# Supplementary material
Source: publisher site journal article supplement (https://www.dovepress.com/article/349441)
Supplement: Supplementary file 1 [file get_supplementary_file.php]

**Supplementary Table 1****Genes positively correlated with ICOS**

| Query    | Statistic | P-value  | FDR (BH) | Event_SD | Event_TD |
|----------|-----------|----------|----------|----------|----------|
| PELP1    | -0.36151  | 2.41E-17 | 3.94E-16 | 515      | 515      |
| ZBTB12   | -0.35751  | 5.67E-17 | 9.16E-16 | 515      | 515      |
| C1orf56  | -0.35304  | 1.46E-16 | 2.32E-15 | 515      | 515      |
| VPS52    | -0.34825  | 3.95E-16 | 6.15E-15 | 515      | 515      |
| CASKIN1  | -0.34484  | 7.94E-16 | 1.21E-14 | 515      | 500      |
| SLC39A7  | -0.34257  | 1.26E-15 | 1.90E-14 | 515      | 515      |
| BAT3     | -0.34106  | 1.71E-15 | 2.56E-14 | 515      | 515      |
| LRP5     | -0.34029  | 1.99E-15 | 2.98E-14 | 515      | 515      |
| EHMT2    | -0.3389   | 2.63E-15 | 3.90E-14 | 515      | 515      |
| NR2F6    | -0.33629  | 4.41E-15 | 6.50E-14 | 515      | 515      |
| TMTC4    | -0.33501  | 5.67E-15 | 8.32E-14 | 515      | 515      |
| FNBP1L   | -0.334    | 6.92E-15 | 1.01E-13 | 515      | 515      |
| KIAA0664 | -0.33248  | 9.30E-15 | 1.35E-13 | 515      | 515      |
| PACSIN3  | -0.33248  | 9.31E-15 | 1.35E-13 | 515      | 515      |
| FXR2     | -0.32927  | 1.73E-14 | 2.47E-13 | 515      | 515      |
| UNC45A   | -0.3287   | 1.93E-14 | 2.75E-13 | 515      | 515      |
| KIAA1549 | -0.32832  | 2.08E-14 | 2.95E-13 | 515      | 515      |
| MOSC1    | -0.327    | 2.67E-14 | 3.78E-13 | 515      | 515      |
| FASN     | -0.32645  | 2.97E-14 | 4.18E-13 | 515      | 515      |
| C2CD4D   | -0.32463  | 4.20E-14 | 5.87E-13 | 515      | 512      |
| ICA1     | -0.32413  | 4.62E-14 | 6.45E-13 | 515      | 515      |
| C17orf28 | -0.32095  | 8.38E-14 | 1.15E-12 | 515      | 515      |
| CREB3L4  | -0.32034  | 9.39E-14 | 1.29E-12 | 515      | 515      |
| OVOL2    | -0.31968  | 1.06E-13 | 1.45E-12 | 515      | 514      |
| GSTP1    | -0.31944  | 1.11E-13 | 1.52E-12 | 515      | 515      |
| RAB40C   | -0.31899  | 1.21E-13 | 1.65E-12 | 515      | 515      |
| WHSC2    | -0.31887  | 1.23E-13 | 1.68E-12 | 515      | 515      |
| TEAD3    | -0.31863  | 1.29E-13 | 1.75E-12 | 515      | 515      |
| DHCR7    | -0.31808  | 1.43E-13 | 1.93E-12 | 515      | 515      |
| STARD10  | -0.3169   | 1.78E-13 | 2.38E-12 | 515      | 515      |
| TNK1     | -0.31605  | 2.07E-13 | 2.77E-12 | 515      | 515      |
| FN3K     | -0.31426  | 2.88E-13 | 3.82E-12 | 515      | 515      |
| OPLAH    | -0.31143  | 4.80E-13 | 6.25E-12 | 515      | 515      |
| GPR125   | -0.30992  | 6.29E-13 | 8.14E-12 | 515      | 515      |
| ZBTB42   | -0.30935  | 6.97E-13 | 8.99E-12 | 515      | 515      |
| CTTN     | -0.30865  | 7.90E-13 | 1.02E-11 | 515      | 515      |
| DDR1     | -0.30845  | 8.18E-13 | 1.05E-11 | 515      | 515      |
| YIPF3    | -0.30734  | 9.96E-13 | 1.27E-11 | 515      | 515      |
| NECAB3   | -0.30723  | 1.02E-12 | 1.29E-11 | 515      | 515      |
| MMP15    | -0.30455  | 1.63E-12 | 2.05E-11 | 515      | 515      |
| PANK1    | -0.3032   | 2.06E-12 | 2.57E-11 | 515      | 515      |
| NMB      | -0.30317  | 2.07E-12 | 2.58E-11 | 515      | 515      |
| KDM5B    | -0.30274  | 2.23E-12 | 2.78E-11 | 515      | 515      |
| IRF2BP1  | -0.3002   | 3.47E-12 | 4.25E-11 | 515      | 515      |
| TMEM9    | -0.30002  | 3.58E-12 | 4.38E-11 | 515      | 515      |
| TACC2    | -0.29926  | 4.08E-12 | 4.98E-11 | 515      | 515      |
| GRTP1    | -0.29827  | 4.84E-12 | 5.87E-11 | 515      | 515      |
| MCAT     | -0.29802  | 5.04E-12 | 6.10E-11 | 515      | 515      |
| FAM174B  | -0.29781  | 5.23E-12 | 6.31E-11 | 515      | 515      |
| MAZ      | -0.29739  | 5.62E-12 | 6.76E-11 | 515      | 515      |

|           |          |          |          |     |     |
|-----------|----------|----------|----------|-----|-----|
| C6orf136  | -0.29707 | 5.93E-12 | 7.11E-11 | 515 | 515 |
| C20orf151 | -0.29636 | 6.70E-12 | 8.02E-11 | 515 | 512 |
| TM7SF2    | -0.29603 | 7.09E-12 | 8.45E-11 | 515 | 515 |
| ARHGAP39  | -0.29478 | 8.76E-12 | 1.04E-10 | 515 | 515 |
| KLF5      | -0.29427 | 9.54E-12 | 1.12E-10 | 515 | 515 |
| C14orf93  | -0.29369 | 1.05E-11 | 1.24E-10 | 515 | 515 |
| KIAA0114  | -0.29353 | 1.08E-11 | 1.27E-10 | 515 | 515 |
| ATP1B1    | -0.29246 | 1.29E-11 | 1.51E-10 | 515 | 515 |
| PDIA3P    | -0.29216 | 1.36E-11 | 1.59E-10 | 515 | 515 |
| MFSD10    | -0.2921  | 1.37E-11 | 1.60E-10 | 515 | 515 |
| MRPS26    | -0.2914  | 1.54E-11 | 1.79E-10 | 515 | 515 |
| ZNF74     | -0.29097 | 1.66E-11 | 1.92E-10 | 515 | 515 |
| ALDH18A1  | -0.29023 | 1.88E-11 | 2.16E-10 | 515 | 515 |
| PATZ1     | -0.2901  | 1.92E-11 | 2.20E-10 | 515 | 515 |
| PTOV1     | -0.28905 | 2.28E-11 | 2.61E-10 | 515 | 515 |
| ABCB6     | -0.28839 | 2.54E-11 | 2.89E-10 | 515 | 515 |
| NFS1      | -0.28829 | 2.58E-11 | 2.94E-10 | 515 | 515 |
| DVL2      | -0.2882  | 2.62E-11 | 2.98E-10 | 515 | 515 |
| TMEM81    | -0.28811 | 2.66E-11 | 3.02E-10 | 515 | 515 |
| MAGED1    | -0.28759 | 2.90E-11 | 3.29E-10 | 515 | 515 |
| GYG2      | -0.28734 | 3.02E-11 | 3.42E-10 | 515 | 515 |
| TNRC18    | -0.28709 | 3.15E-11 | 3.55E-10 | 515 | 515 |
| LYSMD1    | -0.28697 | 3.21E-11 | 3.62E-10 | 515 | 515 |
| OTUD7B    | -0.28637 | 3.54E-11 | 3.97E-10 | 515 | 515 |
| SH3BP5L   | -0.28618 | 3.65E-11 | 4.10E-10 | 515 | 515 |
| PPME1     | -0.28606 | 3.72E-11 | 4.16E-10 | 515 | 515 |
| TH1L      | -0.28582 | 3.87E-11 | 4.32E-10 | 515 | 515 |
| WRNIP1    | -0.28577 | 3.90E-11 | 4.36E-10 | 515 | 515 |
| KIAA1522  | -0.28529 | 4.22E-11 | 4.70E-10 | 515 | 515 |
| PYG02     | -0.28487 | 4.52E-11 | 5.02E-10 | 515 | 515 |
| C10orf57  | -0.28456 | 4.75E-11 | 5.26E-10 | 515 | 515 |
| PIGT      | -0.28434 | 4.93E-11 | 5.44E-10 | 515 | 515 |
| USP21     | -0.28151 | 7.77E-11 | 8.46E-10 | 515 | 515 |
| LSM14B    | -0.28127 | 8.07E-11 | 8.78E-10 | 515 | 515 |
| SLC22A23  | -0.28045 | 9.21E-11 | 9.98E-10 | 515 | 515 |
| JUP       | -0.28001 | 9.88E-11 | 1.07E-09 | 515 | 515 |
| DHRS13    | -0.27998 | 9.93E-11 | 1.07E-09 | 515 | 515 |
| ATP8B1    | -0.27911 | 1.14E-10 | 1.22E-09 | 515 | 515 |
| UBQLN4    | -0.27884 | 1.19E-10 | 1.28E-09 | 515 | 515 |
| CCDC149   | -0.27882 | 1.19E-10 | 1.28E-09 | 515 | 515 |
| PRPF40B   | -0.27841 | 1.27E-10 | 1.36E-09 | 515 | 515 |
| FAM83H    | -0.27826 | 1.30E-10 | 1.39E-09 | 515 | 515 |
| NEDD4L    | -0.27824 | 1.31E-10 | 1.39E-09 | 515 | 515 |
| EI24      | -0.27817 | 1.32E-10 | 1.41E-09 | 515 | 515 |
| SHMT1     | -0.27723 | 1.53E-10 | 1.62E-09 | 515 | 515 |
| LNX1      | -0.27612 | 1.83E-10 | 1.92E-09 | 515 | 515 |
| TXNRD2    | -0.27606 | 1.84E-10 | 1.93E-09 | 515 | 515 |
| PDIA3     | -0.27554 | 2.00E-10 | 2.09E-09 | 515 | 515 |
| MEN1      | -0.27541 | 2.04E-10 | 2.13E-09 | 515 | 515 |
| BFSP1     | -0.27518 | 2.12E-10 | 2.20E-09 | 515 | 515 |
| GPT2      | -0.27459 | 2.32E-10 | 2.41E-09 | 515 | 515 |
| EFCAB4A   | -0.27439 | 2.39E-10 | 2.48E-09 | 515 | 515 |
| CLDN7     | -0.27439 | 2.39E-10 | 2.48E-09 | 515 | 515 |
| ANP32A    | -0.27428 | 2.43E-10 | 2.52E-09 | 515 | 515 |

|           |          |          |          |     |     |
|-----------|----------|----------|----------|-----|-----|
| PUM1      | -0.27367 | 2.68E-10 | 2.76E-09 | 515 | 515 |
| C8orf30A  | -0.27318 | 2.89E-10 | 2.97E-09 | 515 | 515 |
| ACAD10    | -0.27263 | 3.14E-10 | 3.22E-09 | 515 | 515 |
| C1orf66   | -0.27203 | 3.45E-10 | 3.52E-09 | 515 | 515 |
| C1orf172  | -0.27127 | 3.88E-10 | 3.95E-09 | 515 | 515 |
| FURIN     | -0.27123 | 3.90E-10 | 3.97E-09 | 515 | 515 |
| C11orf49  | -0.27073 | 4.21E-10 | 4.27E-09 | 515 | 515 |
| CDK2AP2   | -0.27033 | 4.48E-10 | 4.53E-09 | 515 | 515 |
| IRS2      | -0.27031 | 4.50E-10 | 4.55E-09 | 515 | 515 |
| SAMD1     | -0.27005 | 4.67E-10 | 4.72E-09 | 515 | 515 |
| MED9      | -0.26911 | 5.40E-10 | 5.43E-09 | 515 | 515 |
| GTF3C2    | -0.26814 | 6.25E-10 | 6.25E-09 | 515 | 515 |
| IMPA2     | -0.26789 | 6.50E-10 | 6.50E-09 | 515 | 515 |
| CARKD     | -0.26731 | 7.10E-10 | 7.08E-09 | 515 | 515 |
| C16orf58  | -0.26727 | 7.13E-10 | 7.11E-09 | 515 | 515 |
| GTF2IRD1  | -0.26675 | 7.72E-10 | 7.67E-09 | 515 | 515 |
| PWWP2B    | -0.2665  | 8.01E-10 | 7.95E-09 | 515 | 515 |
| RAB26     | -0.26645 | 8.07E-10 | 8.00E-09 | 515 | 515 |
| CATSPER2F | -0.26633 | 8.22E-10 | 8.14E-09 | 515 | 515 |
| MTA3      | -0.26624 | 8.34E-10 | 8.25E-09 | 515 | 515 |
| CDK16     | -0.26623 | 8.35E-10 | 8.26E-09 | 515 | 515 |
| BSCL2     | -0.26622 | 8.36E-10 | 8.27E-09 | 515 | 515 |
| C8orf55   | -0.26589 | 8.78E-10 | 8.68E-09 | 515 | 515 |
| RNF187    | -0.26573 | 8.99E-10 | 8.87E-09 | 515 | 515 |
| DLG5      | -0.26557 | 9.22E-10 | 9.09E-09 | 515 | 515 |
| ZNF768    | -0.26535 | 9.53E-10 | 9.37E-09 | 515 | 515 |
| ZNF687    | -0.26447 | 1.09E-09 | 1.06E-08 | 515 | 515 |
| NTHL1     | -0.26405 | 1.16E-09 | 1.13E-08 | 515 | 515 |
| SCMH1     | -0.26358 | 1.24E-09 | 1.20E-08 | 515 | 515 |
| MAGEF1    | -0.26346 | 1.26E-09 | 1.22E-08 | 515 | 515 |
| POGK      | -0.2632  | 1.31E-09 | 1.27E-08 | 515 | 515 |
| RAB3D     | -0.26291 | 1.37E-09 | 1.32E-08 | 515 | 515 |
| TRIM27    | -0.26289 | 1.38E-09 | 1.33E-08 | 515 | 515 |
| PEMT      | -0.26267 | 1.42E-09 | 1.37E-08 | 515 | 515 |
| C10orf75  | -0.26257 | 1.44E-09 | 1.39E-08 | 515 | 515 |
| SOX4      | -0.26234 | 1.49E-09 | 1.43E-08 | 515 | 515 |
| KIAA1543  | -0.26219 | 1.53E-09 | 1.46E-08 | 515 | 515 |
| NPW       | -0.26215 | 1.53E-09 | 1.47E-08 | 515 | 496 |
| EBPL      | -0.26197 | 1.58E-09 | 1.51E-08 | 515 | 515 |
| NOL10     | -0.26188 | 1.60E-09 | 1.53E-08 | 515 | 515 |
| PICK1     | -0.26187 | 1.60E-09 | 1.53E-08 | 515 | 515 |
| VAR5      | -0.26176 | 1.63E-09 | 1.55E-08 | 515 | 515 |
| LASS2     | -0.26167 | 1.65E-09 | 1.57E-08 | 515 | 515 |
| THAP4     | -0.26163 | 1.66E-09 | 1.58E-08 | 515 | 515 |
| BANP      | -0.2611  | 1.79E-09 | 1.70E-08 | 515 | 515 |
| JMJD8     | -0.26099 | 1.82E-09 | 1.73E-08 | 515 | 515 |
| ATP7B     | -0.26093 | 1.84E-09 | 1.74E-08 | 515 | 515 |
| PYCR1     | -0.26075 | 1.89E-09 | 1.78E-08 | 515 | 515 |
| OSBPL2    | -0.2605  | 1.96E-09 | 1.85E-08 | 515 | 515 |
| C19orf45  | -0.26044 | 1.97E-09 | 1.86E-08 | 515 | 453 |
| C6orf134  | -0.26025 | 2.03E-09 | 1.91E-08 | 515 | 515 |
| EIF2AK1   | -0.26011 | 2.07E-09 | 1.95E-08 | 515 | 515 |
| LEMD2     | -0.25978 | 2.18E-09 | 2.04E-08 | 515 | 515 |
| FLJ39653  | -0.25974 | 2.19E-09 | 2.05E-08 | 515 | 515 |

|          |          |          |          |     |     |
|----------|----------|----------|----------|-----|-----|
| DCTN1    | -0.25961 | 2.23E-09 | 2.08E-08 | 515 | 515 |
| DCXR     | -0.25947 | 2.28E-09 | 2.13E-08 | 515 | 515 |
| SIX5     | -0.25934 | 2.32E-09 | 2.16E-08 | 515 | 515 |
| NGRN     | -0.2593  | 2.34E-09 | 2.18E-08 | 515 | 515 |
| C8orf51  | -0.25863 | 2.57E-09 | 2.38E-08 | 515 | 515 |
| CAPN5    | -0.25832 | 2.70E-09 | 2.50E-08 | 515 | 515 |
| DGAT1    | -0.25808 | 2.79E-09 | 2.58E-08 | 515 | 515 |
| SRMS     | -0.25792 | 2.86E-09 | 2.64E-08 | 515 | 462 |
| LRRC47   | -0.25773 | 2.93E-09 | 2.70E-08 | 515 | 515 |
| ADSSL1   | -0.25769 | 2.95E-09 | 2.72E-08 | 515 | 515 |
| CD320    | -0.25705 | 3.24E-09 | 2.97E-08 | 515 | 515 |
| UBE2Q1   | -0.25648 | 3.52E-09 | 3.22E-08 | 515 | 515 |
| KRTCAP3  | -0.25635 | 3.59E-09 | 3.27E-08 | 515 | 515 |
| RPP21    | -0.25631 | 3.61E-09 | 3.29E-08 | 515 | 515 |
| HIBCH    | -0.25617 | 3.68E-09 | 3.35E-08 | 515 | 515 |
| AARSD1   | -0.25525 | 4.20E-09 | 3.81E-08 | 515 | 515 |
| AGXT2L1  | -0.25524 | 4.21E-09 | 3.81E-08 | 515 | 233 |
| SPIRE2   | -0.2552  | 4.23E-09 | 3.84E-08 | 515 | 515 |
| SMG7     | -0.25485 | 4.45E-09 | 4.02E-08 | 515 | 515 |
| NIPSNAP1 | -0.25478 | 4.50E-09 | 4.05E-08 | 515 | 515 |
| FAM86C   | -0.25432 | 4.80E-09 | 4.32E-08 | 515 | 515 |
| MPST     | -0.25422 | 4.87E-09 | 4.38E-08 | 515 | 515 |
| FXD4     | -0.25419 | 4.89E-09 | 4.40E-08 | 515 | 363 |
| WNK2     | -0.25388 | 5.12E-09 | 4.59E-08 | 515 | 512 |
| TARS2    | -0.2538  | 5.17E-09 | 4.64E-08 | 515 | 515 |
| MGC70857 | -0.25313 | 5.69E-09 | 5.08E-08 | 515 | 515 |
| AGPHD1   | -0.25298 | 5.81E-09 | 5.19E-08 | 515 | 514 |
| KLHL25   | -0.25292 | 5.86E-09 | 5.23E-08 | 515 | 515 |
| FRAT2    | -0.25265 | 6.09E-09 | 5.42E-08 | 515 | 515 |
| GCAT     | -0.25242 | 6.29E-09 | 5.58E-08 | 515 | 515 |
| GPR56    | -0.2524  | 6.31E-09 | 5.59E-08 | 515 | 515 |
| PRKCSH   | -0.25216 | 6.53E-09 | 5.77E-08 | 515 | 515 |
| DHTKD1   | -0.25209 | 6.60E-09 | 5.83E-08 | 515 | 515 |
| NDUFS2   | -0.25208 | 6.61E-09 | 5.83E-08 | 515 | 515 |
| ITFG3    | -0.25193 | 6.75E-09 | 5.95E-08 | 515 | 515 |
| DVL1     | -0.25171 | 6.96E-09 | 6.12E-08 | 515 | 515 |
| C1orf27  | -0.25169 | 6.98E-09 | 6.13E-08 | 515 | 515 |
| EPN3     | -0.25158 | 7.09E-09 | 6.22E-08 | 515 | 513 |
| OTX1     | -0.25156 | 7.11E-09 | 6.23E-08 | 515 | 515 |
| RAB40B   | -0.25126 | 7.42E-09 | 6.49E-08 | 515 | 515 |
| INHA     | -0.25106 | 7.64E-09 | 6.67E-08 | 515 | 492 |
| PEX11A   | -0.25045 | 8.32E-09 | 7.24E-08 | 515 | 515 |
| CNNM3    | -0.24966 | 9.29E-09 | 8.06E-08 | 515 | 515 |
| NOL3     | -0.24959 | 9.38E-09 | 8.14E-08 | 515 | 515 |
| ULK1     | -0.24951 | 9.49E-09 | 8.22E-08 | 515 | 515 |
| SCRIB    | -0.24949 | 9.52E-09 | 8.24E-08 | 515 | 515 |
| PNKD     | -0.24916 | 9.97E-09 | 8.62E-08 | 515 | 515 |
| ZSCAN2   | -0.24899 | 1.02E-08 | 8.80E-08 | 515 | 515 |
| PIGU     | -0.24886 | 1.04E-08 | 8.95E-08 | 515 | 515 |
| C2orf15  | -0.24874 | 1.06E-08 | 9.10E-08 | 515 | 515 |
| CUTA     | -0.24864 | 1.07E-08 | 9.21E-08 | 515 | 515 |
| RCCD1    | -0.24842 | 1.11E-08 | 9.49E-08 | 515 | 515 |
| GPS2     | -0.24834 | 1.12E-08 | 9.59E-08 | 515 | 515 |
| ALDH4A1  | -0.24833 | 1.12E-08 | 9.60E-08 | 515 | 515 |

|          |          |          |          |     |     |
|----------|----------|----------|----------|-----|-----|
| C6orf132 | -0.24814 | 1.15E-08 | 9.84E-08 | 515 | 515 |
| PPP1R11  | -0.24811 | 1.15E-08 | 9.88E-08 | 515 | 515 |
| TJP3     | -0.24792 | 1.19E-08 | 1.01E-07 | 515 | 515 |
| PEX6     | -0.24776 | 1.21E-08 | 1.03E-07 | 515 | 515 |
| C15orf63 | -0.24766 | 1.23E-08 | 1.05E-07 | 515 | 515 |
| DDX27    | -0.24757 | 1.24E-08 | 1.06E-07 | 515 | 515 |
| SPTBN2   | -0.24751 | 1.25E-08 | 1.07E-07 | 515 | 515 |
| NOL7     | -0.24724 | 1.30E-08 | 1.11E-07 | 515 | 515 |
| SLC35B2  | -0.24713 | 1.32E-08 | 1.12E-07 | 515 | 515 |
| SORBS2   | -0.24684 | 1.38E-08 | 1.16E-07 | 515 | 515 |
| PRPF6    | -0.24657 | 1.43E-08 | 1.21E-07 | 515 | 515 |
| RNF208   | -0.24643 | 1.46E-08 | 1.23E-07 | 515 | 515 |
| ERP29    | -0.24636 | 1.47E-08 | 1.24E-07 | 515 | 515 |
| RAB4A    | -0.24628 | 1.49E-08 | 1.25E-07 | 515 | 515 |
| FOXP4    | -0.24617 | 1.51E-08 | 1.27E-07 | 515 | 515 |
| EIF2B4   | -0.24601 | 1.55E-08 | 1.30E-07 | 515 | 515 |
| PFAS     | -0.24598 | 1.55E-08 | 1.30E-07 | 515 | 515 |
| KLC4     | -0.24595 | 1.56E-08 | 1.31E-07 | 515 | 515 |
| EFNA3    | -0.24591 | 1.57E-08 | 1.31E-07 | 515 | 515 |
| MBTPS1   | -0.24512 | 1.75E-08 | 1.46E-07 | 515 | 515 |
| ADIPOR1  | -0.24496 | 1.79E-08 | 1.49E-07 | 515 | 515 |
| TRAPPC9  | -0.24489 | 1.80E-08 | 1.50E-07 | 515 | 515 |
| SLC25A10 | -0.24481 | 1.82E-08 | 1.52E-07 | 515 | 515 |
| ACACA    | -0.2447  | 1.85E-08 | 1.54E-07 | 515 | 515 |
| KIAA0182 | -0.24468 | 1.86E-08 | 1.54E-07 | 515 | 515 |
| MORC2    | -0.24441 | 1.93E-08 | 1.60E-07 | 515 | 515 |
| MRPS18A  | -0.24434 | 1.95E-08 | 1.61E-07 | 515 | 515 |
| APITD1   | -0.24429 | 1.96E-08 | 1.62E-07 | 515 | 515 |
| RNPEP    | -0.24414 | 2.00E-08 | 1.65E-07 | 515 | 515 |
| IARS2    | -0.24411 | 2.01E-08 | 1.66E-07 | 515 | 515 |
| CNTROB   | -0.24406 | 2.02E-08 | 1.67E-07 | 515 | 515 |
| PRUNE    | -0.24395 | 2.05E-08 | 1.69E-07 | 515 | 515 |
| AGBL5    | -0.24389 | 2.07E-08 | 1.71E-07 | 515 | 515 |
| PYCR2    | -0.24351 | 2.18E-08 | 1.79E-07 | 515 | 515 |
| TRPM5    | -0.24344 | 2.20E-08 | 1.80E-07 | 515 | 408 |
| ZNF219   | -0.24339 | 2.21E-08 | 1.82E-07 | 515 | 515 |
| C9orf7   | -0.24334 | 2.23E-08 | 1.83E-07 | 515 | 515 |
| USP43    | -0.24329 | 2.24E-08 | 1.84E-07 | 515 | 515 |
| RBM15B   | -0.24323 | 2.26E-08 | 1.85E-07 | 515 | 515 |
| UBAP2L   | -0.24308 | 2.31E-08 | 1.89E-07 | 515 | 515 |
| COG7     | -0.24305 | 2.32E-08 | 1.90E-07 | 515 | 515 |
| DDX1     | -0.24291 | 2.36E-08 | 1.93E-07 | 515 | 515 |
| LLGL2    | -0.24269 | 2.44E-08 | 1.99E-07 | 515 | 515 |
| TTC39A   | -0.24262 | 2.46E-08 | 2.01E-07 | 515 | 515 |
| VARs2    | -0.24253 | 2.49E-08 | 2.03E-07 | 515 | 515 |
| RPRD2    | -0.24253 | 2.49E-08 | 2.03E-07 | 515 | 515 |
| KDM1A    | -0.24249 | 2.50E-08 | 2.04E-07 | 515 | 515 |
| PHF14    | -0.24241 | 2.53E-08 | 2.06E-07 | 515 | 515 |
| C22orf27 | -0.24234 | 2.56E-08 | 2.08E-07 | 515 | 515 |
| KLF3     | -0.24227 | 2.58E-08 | 2.10E-07 | 515 | 515 |
| ZNF696   | -0.24211 | 2.64E-08 | 2.14E-07 | 515 | 515 |
| TMED3    | -0.24209 | 2.64E-08 | 2.15E-07 | 515 | 515 |
| NFKBIL1  | -0.24205 | 2.66E-08 | 2.16E-07 | 515 | 515 |
| MYO10    | -0.24186 | 2.73E-08 | 2.21E-07 | 515 | 515 |

|           |          |          |          |     |     |
|-----------|----------|----------|----------|-----|-----|
| YWHAE     | -0.24163 | 2.81E-08 | 2.27E-07 | 515 | 515 |
| ARHGEF16  | -0.24134 | 2.93E-08 | 2.36E-07 | 515 | 515 |
| SMARCD2   | -0.24132 | 2.93E-08 | 2.37E-07 | 515 | 515 |
| MAML3     | -0.24132 | 2.94E-08 | 2.37E-07 | 515 | 515 |
| NUMA1     | -0.24128 | 2.95E-08 | 2.38E-07 | 515 | 515 |
| DPAGT1    | -0.24106 | 3.04E-08 | 2.45E-07 | 515 | 515 |
| INADL     | -0.24102 | 3.06E-08 | 2.46E-07 | 515 | 515 |
| DDB1      | -0.24101 | 3.06E-08 | 2.46E-07 | 515 | 515 |
| MESP1     | -0.24092 | 3.10E-08 | 2.49E-07 | 515 | 515 |
| C15orf61  | -0.24085 | 3.13E-08 | 2.51E-07 | 515 | 515 |
| PPPDE1    | -0.24041 | 3.32E-08 | 2.66E-07 | 515 | 515 |
| TRIM11    | -0.24025 | 3.39E-08 | 2.72E-07 | 515 | 515 |
| RBM4      | -0.23995 | 3.53E-08 | 2.82E-07 | 515 | 515 |
| C21orf125 | -0.23972 | 3.64E-08 | 2.91E-07 | 515 | 498 |
| LTBR      | -0.2397  | 3.65E-08 | 2.92E-07 | 515 | 515 |
| CTPS2     | -0.2396  | 3.70E-08 | 2.95E-07 | 515 | 515 |
| RAI1      | -0.23957 | 3.72E-08 | 2.96E-07 | 515 | 515 |
| KIAA1804  | -0.23947 | 3.77E-08 | 3.00E-07 | 515 | 515 |
| DNMT3A    | -0.2394  | 3.80E-08 | 3.02E-07 | 515 | 515 |
| PCBP1     | -0.23932 | 3.84E-08 | 3.06E-07 | 515 | 515 |
| RPAP1     | -0.2393  | 3.85E-08 | 3.06E-07 | 515 | 515 |
| POLR3H    | -0.23924 | 3.88E-08 | 3.08E-07 | 515 | 515 |
| CLCN2     | -0.23914 | 3.93E-08 | 3.12E-07 | 515 | 515 |
| SLC45A4   | -0.23908 | 3.97E-08 | 3.14E-07 | 515 | 515 |
| BPHL      | -0.23907 | 3.97E-08 | 3.15E-07 | 515 | 515 |
| GFPT1     | -0.23884 | 4.10E-08 | 3.24E-07 | 515 | 515 |
| RNF40     | -0.23882 | 4.11E-08 | 3.24E-07 | 515 | 515 |
| TAF4      | -0.23875 | 4.15E-08 | 3.27E-07 | 515 | 515 |
| RCOR2     | -0.23873 | 4.16E-08 | 3.28E-07 | 515 | 513 |
| MPHOSPH1C | -0.2385  | 4.29E-08 | 3.38E-07 | 515 | 515 |
| TMEM214   | -0.23848 | 4.30E-08 | 3.39E-07 | 515 | 515 |
| IGF1R     | -0.23818 | 4.48E-08 | 3.52E-07 | 515 | 515 |
| ARF1      | -0.23816 | 4.49E-08 | 3.53E-07 | 515 | 515 |
| FKBP2     | -0.23806 | 4.55E-08 | 3.57E-07 | 515 | 515 |
| RMND5A    | -0.23805 | 4.55E-08 | 3.58E-07 | 515 | 515 |
| ZNF205    | -0.23801 | 4.58E-08 | 3.59E-07 | 515 | 515 |
| CMTM4     | -0.23801 | 4.58E-08 | 3.59E-07 | 515 | 515 |
| MYBBP1A   | -0.23801 | 4.58E-08 | 3.59E-07 | 515 | 515 |
| DAK       | -0.23786 | 4.67E-08 | 3.66E-07 | 515 | 515 |
| PGAP2     | -0.23775 | 4.74E-08 | 3.71E-07 | 515 | 515 |
| MRM1      | -0.23758 | 4.85E-08 | 3.79E-07 | 515 | 515 |
| C20orf186 | -0.23756 | 4.86E-08 | 3.79E-07 | 515 | 290 |
| SPINT1    | -0.23752 | 4.88E-08 | 3.81E-07 | 515 | 515 |
| PCYOX1    | -0.23752 | 4.89E-08 | 3.81E-07 | 515 | 515 |
| ESRP2     | -0.2374  | 4.96E-08 | 3.87E-07 | 515 | 515 |
| NUDT8     | -0.2374  | 4.97E-08 | 3.87E-07 | 515 | 515 |
| PPP1R3B   | -0.23732 | 5.02E-08 | 3.91E-07 | 515 | 515 |
| H19       | -0.23725 | 5.07E-08 | 3.94E-07 | 515 | 515 |
| SLC48A1   | -0.23715 | 5.14E-08 | 3.99E-07 | 515 | 515 |
| ATG9A     | -0.23713 | 5.15E-08 | 4.00E-07 | 515 | 515 |
| MSLNL     | -0.23654 | 5.57E-08 | 4.31E-07 | 515 | 388 |
| PLA2G4A   | -0.23641 | 5.66E-08 | 4.38E-07 | 515 | 515 |
| ERGIC3    | -0.23623 | 5.80E-08 | 4.48E-07 | 515 | 515 |
| SUV420H1  | -0.23617 | 5.85E-08 | 4.51E-07 | 515 | 515 |

|           |          |          |          |     |     |
|-----------|----------|----------|----------|-----|-----|
| EIF3CL    | -0.23615 | 5.86E-08 | 4.52E-07 | 515 | 515 |
| PCYT2     | -0.23603 | 5.95E-08 | 4.58E-07 | 515 | 515 |
| BRF1      | -0.23599 | 5.99E-08 | 4.61E-07 | 515 | 515 |
| TMEM189   | -0.23594 | 6.02E-08 | 4.63E-07 | 515 | 515 |
| PUSL1     | -0.23563 | 6.28E-08 | 4.81E-07 | 515 | 515 |
| CUL7      | -0.23548 | 6.41E-08 | 4.91E-07 | 515 | 515 |
| PPP1R16A  | -0.23548 | 6.41E-08 | 4.91E-07 | 515 | 515 |
| BDH1      | -0.23538 | 6.49E-08 | 4.96E-07 | 515 | 515 |
| MCF2L     | -0.23535 | 6.52E-08 | 4.98E-07 | 515 | 515 |
| CCT3      | -0.2349  | 6.91E-08 | 5.27E-07 | 515 | 515 |
| PEX13     | -0.23486 | 6.95E-08 | 5.30E-07 | 515 | 515 |
| SAPS3     | -0.23482 | 6.98E-08 | 5.32E-07 | 515 | 515 |
| SCAMP3    | -0.23481 | 6.99E-08 | 5.33E-07 | 515 | 515 |
| ELP2P     | -0.23479 | 7.01E-08 | 5.34E-07 | 515 | 515 |
| FZD5      | -0.23471 | 7.09E-08 | 5.39E-07 | 515 | 515 |
| BCL9      | -0.23455 | 7.24E-08 | 5.50E-07 | 515 | 515 |
| H1FO      | -0.23428 | 7.50E-08 | 5.68E-07 | 515 | 515 |
| DIS3L2    | -0.23391 | 7.88E-08 | 5.96E-07 | 515 | 515 |
| FAM189B   | -0.23372 | 8.07E-08 | 6.09E-07 | 515 | 515 |
| AHCTF1    | -0.23368 | 8.11E-08 | 6.12E-07 | 515 | 515 |
| ARHGAP32  | -0.23362 | 8.18E-08 | 6.17E-07 | 515 | 515 |
| TTC15     | -0.2335  | 8.31E-08 | 6.26E-07 | 515 | 515 |
| ADPRHL1   | -0.23297 | 8.90E-08 | 6.68E-07 | 515 | 515 |
| CTBP2     | -0.23279 | 9.11E-08 | 6.83E-07 | 515 | 515 |
| EYS       | -0.23209 | 9.98E-08 | 7.46E-07 | 515 | 515 |
| PLCB3     | -0.232   | 1.01E-07 | 7.52E-07 | 515 | 515 |
| CCDC90A   | -0.23169 | 1.05E-07 | 7.82E-07 | 515 | 515 |
| MPDU1     | -0.23155 | 1.07E-07 | 7.95E-07 | 515 | 515 |
| ISYNA1    | -0.23151 | 1.08E-07 | 7.99E-07 | 515 | 515 |
| ProSAPiP1 | -0.23145 | 1.08E-07 | 8.05E-07 | 515 | 515 |
| PGBD2     | -0.23144 | 1.09E-07 | 8.06E-07 | 515 | 515 |
| ERLIN2    | -0.23138 | 1.09E-07 | 8.11E-07 | 515 | 515 |
| INPPL1    | -0.23138 | 1.09E-07 | 8.11E-07 | 515 | 515 |
| PDXDC1    | -0.23127 | 1.11E-07 | 8.21E-07 | 515 | 515 |
| SF3B2     | -0.23117 | 1.12E-07 | 8.31E-07 | 515 | 515 |
| PLA2G12A  | -0.23109 | 1.14E-07 | 8.39E-07 | 515 | 515 |
| AKAP1     | -0.23099 | 1.15E-07 | 8.49E-07 | 515 | 515 |
| ATXN2     | -0.23083 | 1.17E-07 | 8.65E-07 | 515 | 515 |
| COL25A1   | -0.23067 | 1.20E-07 | 8.81E-07 | 515 | 471 |
| TFB2M     | -0.23038 | 1.25E-07 | 9.14E-07 | 515 | 515 |
| RBM47     | -0.23031 | 1.26E-07 | 9.21E-07 | 515 | 515 |
| TRAP1     | -0.23012 | 1.29E-07 | 9.44E-07 | 515 | 515 |
| C6orf130  | -0.22989 | 1.33E-07 | 9.70E-07 | 515 | 515 |
| DHX30     | -0.22959 | 1.38E-07 | 1.01E-06 | 515 | 515 |
| C1orf35   | -0.22946 | 1.40E-07 | 1.02E-06 | 515 | 515 |
| CSNK1E    | -0.22939 | 1.41E-07 | 1.03E-06 | 515 | 515 |
| CNO       | -0.22935 | 1.42E-07 | 1.04E-06 | 515 | 515 |
| SETD6     | -0.22926 | 1.44E-07 | 1.05E-06 | 515 | 515 |
| GLTSCR1   | -0.22925 | 1.44E-07 | 1.05E-06 | 515 | 515 |
| TUFT1     | -0.22918 | 1.45E-07 | 1.06E-06 | 515 | 515 |
| COPG      | -0.22905 | 1.48E-07 | 1.08E-06 | 515 | 515 |
| NOC2L     | -0.22901 | 1.48E-07 | 1.08E-06 | 515 | 515 |
| FAM71E1   | -0.229   | 1.49E-07 | 1.08E-06 | 515 | 515 |
| DBNDD1    | -0.22856 | 1.57E-07 | 1.14E-06 | 515 | 515 |

|           |          |          |          |     |     |
|-----------|----------|----------|----------|-----|-----|
| DCI       | -0.22845 | 1.60E-07 | 1.16E-06 | 515 | 515 |
| FAM164C   | -0.22841 | 1.60E-07 | 1.16E-06 | 515 | 515 |
| HNRNPU    | -0.22832 | 1.62E-07 | 1.17E-06 | 515 | 515 |
| SHARPIN   | -0.22811 | 1.67E-07 | 1.20E-06 | 515 | 515 |
| EPCAM     | -0.22801 | 1.69E-07 | 1.22E-06 | 515 | 515 |
| RHBDD3    | -0.22795 | 1.70E-07 | 1.23E-06 | 515 | 515 |
| AGPAT6    | -0.22792 | 1.71E-07 | 1.23E-06 | 515 | 515 |
| PIGM      | -0.22791 | 1.71E-07 | 1.23E-06 | 515 | 515 |
| ARHGAP8   | -0.2278  | 1.73E-07 | 1.25E-06 | 515 | 515 |
| HDLBP     | -0.22767 | 1.76E-07 | 1.27E-06 | 515 | 515 |
| MARK2     | -0.2276  | 1.78E-07 | 1.28E-06 | 515 | 515 |
| LRRC1     | -0.22756 | 1.79E-07 | 1.28E-06 | 515 | 515 |
| SLC1A5    | -0.22739 | 1.83E-07 | 1.31E-06 | 515 | 515 |
| EDC3      | -0.22688 | 1.95E-07 | 1.39E-06 | 515 | 515 |
| CHKA      | -0.22686 | 1.95E-07 | 1.40E-06 | 515 | 515 |
| NME4      | -0.22675 | 1.98E-07 | 1.41E-06 | 515 | 515 |
| C21orf59  | -0.22671 | 1.99E-07 | 1.42E-06 | 515 | 515 |
| SBK1      | -0.22661 | 2.02E-07 | 1.44E-06 | 515 | 515 |
| PLEKHH3   | -0.22657 | 2.03E-07 | 1.44E-06 | 515 | 515 |
| TRAF4     | -0.22642 | 2.07E-07 | 1.47E-06 | 515 | 515 |
| MRPL24    | -0.22635 | 2.08E-07 | 1.48E-06 | 515 | 515 |
| B4GALT2   | -0.22618 | 2.13E-07 | 1.51E-06 | 515 | 515 |
| SPINK4    | -0.22616 | 2.14E-07 | 1.52E-06 | 515 | 252 |
| ALG8      | -0.22611 | 2.15E-07 | 1.53E-06 | 515 | 515 |
| ZNF76     | -0.22589 | 2.21E-07 | 1.57E-06 | 515 | 515 |
| FAM59A    | -0.22568 | 2.27E-07 | 1.60E-06 | 515 | 515 |
| CCDC120   | -0.22564 | 2.28E-07 | 1.61E-06 | 515 | 515 |
| INTS3     | -0.22561 | 2.29E-07 | 1.62E-06 | 515 | 515 |
| COASY     | -0.22556 | 2.30E-07 | 1.63E-06 | 515 | 515 |
| C14orf1   | -0.22555 | 2.31E-07 | 1.63E-06 | 515 | 515 |
| C15orf56  | -0.22537 | 2.36E-07 | 1.66E-06 | 515 | 514 |
| LOC441177 | -0.22533 | 2.37E-07 | 1.67E-06 | 515 | 177 |
| ATF6B     | -0.22514 | 2.43E-07 | 1.71E-06 | 515 | 515 |
| TMED4     | -0.22498 | 2.48E-07 | 1.74E-06 | 515 | 515 |
| GMEB2     | -0.22496 | 2.48E-07 | 1.75E-06 | 515 | 515 |
| C13orf23  | -0.22484 | 2.52E-07 | 1.77E-06 | 515 | 515 |
| CABYR     | -0.22437 | 2.67E-07 | 1.87E-06 | 515 | 515 |
| ASPSR1    | -0.22434 | 2.68E-07 | 1.88E-06 | 515 | 515 |
| RDH14     | -0.22423 | 2.72E-07 | 1.90E-06 | 515 | 515 |
| SF3B4     | -0.22418 | 2.74E-07 | 1.91E-06 | 515 | 515 |
| DAG1      | -0.22418 | 2.74E-07 | 1.91E-06 | 515 | 515 |
| ATAD3A    | -0.22415 | 2.75E-07 | 1.92E-06 | 515 | 515 |
| PHLPP1    | -0.22414 | 2.75E-07 | 1.92E-06 | 515 | 515 |
| PFDN6     | -0.22407 | 2.78E-07 | 1.93E-06 | 515 | 515 |
| GRAMD2    | -0.22407 | 2.78E-07 | 1.93E-06 | 515 | 515 |
| IL17RE    | -0.22402 | 2.79E-07 | 1.95E-06 | 515 | 515 |
| SLC25A1   | -0.22401 | 2.80E-07 | 1.95E-06 | 515 | 515 |
| RTKN      | -0.22398 | 2.81E-07 | 1.95E-06 | 515 | 515 |
| PER2      | -0.22396 | 2.81E-07 | 1.96E-06 | 515 | 515 |
| ZNF664    | -0.22389 | 2.84E-07 | 1.97E-06 | 515 | 515 |
| MYH14     | -0.22389 | 2.84E-07 | 1.97E-06 | 515 | 515 |
| COG2      | -0.22381 | 2.87E-07 | 1.99E-06 | 515 | 515 |
| S100P     | -0.22379 | 2.87E-07 | 1.99E-06 | 515 | 515 |
| LOC40101C | -0.22379 | 2.88E-07 | 2.00E-06 | 515 | 515 |



|          |          |          |          |     |     |
|----------|----------|----------|----------|-----|-----|
| EN03     | -0.22367 | 2.92E-07 | 2.03E-06 | 515 | 515 |
| ZNF777   | -0.22349 | 2.98E-07 | 2.07E-06 | 515 | 515 |
| MACROD1  | -0.22347 | 2.99E-07 | 2.07E-06 | 515 | 515 |
| ATN1     | -0.22346 | 2.99E-07 | 2.07E-06 | 515 | 515 |
| C6orf176 | -0.2234  | 3.02E-07 | 2.09E-06 | 515 | 359 |
| ESRRA    | -0.22338 | 3.03E-07 | 2.09E-06 | 515 | 515 |
| MLF2     | -0.22336 | 3.03E-07 | 2.10E-06 | 515 | 515 |
| NELF     | -0.22329 | 3.06E-07 | 2.12E-06 | 515 | 515 |
| ACTR3B   | -0.22321 | 3.09E-07 | 2.13E-06 | 515 | 515 |
| UPF1     | -0.22314 | 3.12E-07 | 2.15E-06 | 515 | 515 |
| CBR1     | -0.22306 | 3.15E-07 | 2.17E-06 | 515 | 515 |
| MAGI1    | -0.22297 | 3.18E-07 | 2.19E-06 | 515 | 515 |
| GRHL2    | -0.22296 | 3.19E-07 | 2.19E-06 | 515 | 515 |
| SOX12    | -0.22292 | 3.20E-07 | 2.20E-06 | 515 | 515 |
| SCYL1    | -0.22288 | 3.22E-07 | 2.21E-06 | 515 | 515 |
| ZNF444   | -0.22274 | 3.28E-07 | 2.25E-06 | 515 | 515 |
| MYCNOS   | -0.22255 | 3.36E-07 | 2.30E-06 | 515 | 190 |
| NCSTN    | -0.22244 | 3.40E-07 | 2.33E-06 | 515 | 515 |
| ARHGEF19 | -0.2221  | 3.55E-07 | 2.43E-06 | 515 | 515 |
| NEURL4   | -0.22208 | 3.56E-07 | 2.43E-06 | 515 | 515 |
| TUFM     | -0.22203 | 3.58E-07 | 2.44E-06 | 515 | 515 |
| KAZALD1  | -0.22202 | 3.58E-07 | 2.45E-06 | 515 | 515 |
| COQ9     | -0.22186 | 3.66E-07 | 2.50E-06 | 515 | 515 |
| BAG1     | -0.22174 | 3.71E-07 | 2.53E-06 | 515 | 515 |
| RHBDL1   | -0.22164 | 3.76E-07 | 2.56E-06 | 515 | 514 |
| RRP12    | -0.22163 | 3.76E-07 | 2.56E-06 | 515 | 515 |
| ABCF1    | -0.22138 | 3.88E-07 | 2.64E-06 | 515 | 515 |
| TBL1X    | -0.22132 | 3.91E-07 | 2.66E-06 | 515 | 515 |
| OBSL1    | -0.22115 | 3.99E-07 | 2.71E-06 | 515 | 515 |
| AACS     | -0.22098 | 4.08E-07 | 2.76E-06 | 515 | 515 |
| ALKBH5   | -0.22095 | 4.09E-07 | 2.77E-06 | 515 | 515 |
| TRIM28   | -0.22071 | 4.21E-07 | 2.86E-06 | 515 | 515 |
| DDT      | -0.22051 | 4.32E-07 | 2.92E-06 | 515 | 515 |
| LRRC45   | -0.22015 | 4.51E-07 | 3.04E-06 | 515 | 515 |
| HSPA1A   | -0.22013 | 4.53E-07 | 3.05E-06 | 515 | 515 |
| PTGR2    | -0.2199  | 4.66E-07 | 3.13E-06 | 515 | 515 |
| ENSA     | -0.21982 | 4.70E-07 | 3.16E-06 | 515 | 515 |
| CD151    | -0.21982 | 4.70E-07 | 3.16E-06 | 515 | 515 |
| PEX10    | -0.21934 | 4.99E-07 | 3.34E-06 | 515 | 515 |
| SLC29A2  | -0.21933 | 4.99E-07 | 3.34E-06 | 515 | 515 |
| PTCD1    | -0.21928 | 5.03E-07 | 3.37E-06 | 515 | 515 |
| AAMP     | -0.21927 | 5.03E-07 | 3.37E-06 | 515 | 515 |
| KCNJ11   | -0.21897 | 5.22E-07 | 3.49E-06 | 515 | 514 |
| PAXIP1   | -0.21895 | 5.23E-07 | 3.49E-06 | 515 | 515 |
| ARVCF    | -0.21892 | 5.25E-07 | 3.51E-06 | 515 | 515 |
| VPS72    | -0.2188  | 5.32E-07 | 3.55E-06 | 515 | 515 |
| YTHDF2   | -0.21875 | 5.36E-07 | 3.57E-06 | 515 | 515 |
| RAPGEFL1 | -0.2186  | 5.46E-07 | 3.64E-06 | 515 | 515 |
| SMG5     | -0.21856 | 5.48E-07 | 3.66E-06 | 515 | 515 |
| PIPSL    | -0.21853 | 5.51E-07 | 3.67E-06 | 515 | 515 |
| EPRS     | -0.21849 | 5.53E-07 | 3.68E-06 | 515 | 515 |
| ZDHHC16  | -0.2184  | 5.59E-07 | 3.72E-06 | 515 | 515 |
| SETDB1   | -0.21829 | 5.67E-07 | 3.77E-06 | 515 | 515 |
| PDHX     | -0.21827 | 5.68E-07 | 3.78E-06 | 515 | 515 |

|           |          |          |          |     |     |
|-----------|----------|----------|----------|-----|-----|
| PRCC      | -0.21825 | 5.69E-07 | 3.79E-06 | 515 | 515 |
| NDUFA10   | -0.21822 | 5.71E-07 | 3.80E-06 | 515 | 515 |
| HYOU1     | -0.21819 | 5.74E-07 | 3.81E-06 | 515 | 515 |
| PAK4      | -0.21814 | 5.77E-07 | 3.83E-06 | 515 | 515 |
| G6PC3     | -0.21801 | 5.86E-07 | 3.89E-06 | 515 | 515 |
| SHANK2    | -0.21799 | 5.88E-07 | 3.90E-06 | 515 | 515 |
| SMARCA1   | -0.21795 | 5.91E-07 | 3.91E-06 | 515 | 515 |
| C2orf108  | -0.21793 | 5.92E-07 | 3.92E-06 | 515 | 515 |
| GYLTL1B   | -0.21778 | 6.03E-07 | 3.99E-06 | 515 | 515 |
| WDR72     | -0.21759 | 6.17E-07 | 4.08E-06 | 515 | 505 |
| ODC1      | -0.21754 | 6.21E-07 | 4.10E-06 | 515 | 515 |
| LETM1     | -0.21749 | 6.25E-07 | 4.12E-06 | 515 | 515 |
| ELL3      | -0.21744 | 6.28E-07 | 4.14E-06 | 515 | 515 |
| RPN2      | -0.21731 | 6.38E-07 | 4.20E-06 | 515 | 515 |
| CBX2      | -0.217   | 6.63E-07 | 4.36E-06 | 515 | 515 |
| C2orf34   | -0.21697 | 6.65E-07 | 4.37E-06 | 515 | 515 |
| HSF1      | -0.21694 | 6.68E-07 | 4.39E-06 | 515 | 515 |
| TMEM52    | -0.21686 | 6.75E-07 | 4.43E-06 | 515 | 514 |
| TMEM54    | -0.21684 | 6.76E-07 | 4.43E-06 | 515 | 515 |
| GALE      | -0.2168  | 6.79E-07 | 4.45E-06 | 515 | 515 |
| PODXL2    | -0.21676 | 6.82E-07 | 4.47E-06 | 515 | 515 |
| VAPB      | -0.21654 | 7.01E-07 | 4.58E-06 | 515 | 515 |
| NXPH1     | -0.21651 | 7.04E-07 | 4.60E-06 | 515 | 330 |
| B3GALNT2  | -0.21649 | 7.05E-07 | 4.61E-06 | 515 | 515 |
| PPDPF     | -0.21636 | 7.16E-07 | 4.67E-06 | 515 | 515 |
| PSMD4     | -0.21626 | 7.25E-07 | 4.73E-06 | 515 | 515 |
| SLC44A3   | -0.21619 | 7.31E-07 | 4.76E-06 | 515 | 515 |
| TSTA3     | -0.21618 | 7.32E-07 | 4.77E-06 | 515 | 515 |
| TMEM93    | -0.21571 | 7.74E-07 | 5.03E-06 | 515 | 515 |
| GLTPD2    | -0.21563 | 7.82E-07 | 5.08E-06 | 515 | 340 |
| PKP3      | -0.21555 | 7.90E-07 | 5.13E-06 | 515 | 515 |
| RAB13     | -0.21553 | 7.92E-07 | 5.14E-06 | 515 | 515 |
| POU2F1    | -0.2152  | 8.23E-07 | 5.33E-06 | 515 | 515 |
| PPIB      | -0.21508 | 8.36E-07 | 5.41E-06 | 515 | 515 |
| SPATA5L1  | -0.21497 | 8.46E-07 | 5.48E-06 | 515 | 515 |
| BAT2      | -0.21487 | 8.57E-07 | 5.54E-06 | 515 | 515 |
| C1orf77   | -0.2148  | 8.64E-07 | 5.57E-06 | 515 | 515 |
| KCTD1     | -0.21478 | 8.66E-07 | 5.59E-06 | 515 | 515 |
| LOC388152 | -0.2147  | 8.75E-07 | 5.64E-06 | 515 | 515 |
| ZBTB7B    | -0.21467 | 8.78E-07 | 5.66E-06 | 515 | 515 |
| CRELD1    | -0.21458 | 8.87E-07 | 5.71E-06 | 515 | 515 |
| LRRC26    | -0.21454 | 8.92E-07 | 5.74E-06 | 515 | 475 |
| PRPF8     | -0.21453 | 8.93E-07 | 5.75E-06 | 515 | 515 |
| KIF1C     | -0.21447 | 8.99E-07 | 5.78E-06 | 515 | 515 |
| GPAA1     | -0.21444 | 9.02E-07 | 5.80E-06 | 515 | 515 |
| RGL2      | -0.21443 | 9.03E-07 | 5.80E-06 | 515 | 515 |
| MAGIX     | -0.21418 | 9.31E-07 | 5.97E-06 | 515 | 515 |
| BRSK2     | -0.21403 | 9.47E-07 | 6.06E-06 | 515 | 502 |
| LIG3      | -0.21395 | 9.57E-07 | 6.11E-06 | 515 | 515 |
| MOSPD3    | -0.21392 | 9.60E-07 | 6.13E-06 | 515 | 515 |
| IRF2BP2   | -0.21382 | 9.72E-07 | 6.21E-06 | 515 | 515 |
| NARS2     | -0.21365 | 9.92E-07 | 6.32E-06 | 515 | 515 |
| SCNN1A    | -0.21353 | 1.01E-06 | 6.40E-06 | 515 | 515 |
| LRRC41    | -0.21323 | 1.04E-06 | 6.63E-06 | 515 | 515 |

|           |          |          |          |     |     |
|-----------|----------|----------|----------|-----|-----|
| BYSL      | -0.2131  | 1.06E-06 | 6.72E-06 | 515 | 515 |
| PART1     | -0.21308 | 1.06E-06 | 6.73E-06 | 515 | 357 |
| ICK       | -0.21307 | 1.06E-06 | 6.74E-06 | 515 | 515 |
| MIA3      | -0.21278 | 1.10E-06 | 6.96E-06 | 515 | 515 |
| RAB1B     | -0.21278 | 1.10E-06 | 6.96E-06 | 515 | 515 |
| CDR2L     | -0.21273 | 1.11E-06 | 7.00E-06 | 515 | 515 |
| TUT1      | -0.21273 | 1.11E-06 | 7.00E-06 | 515 | 515 |
| SSH3      | -0.21267 | 1.11E-06 | 7.05E-06 | 515 | 515 |
| C1orf161  | -0.21261 | 1.12E-06 | 7.10E-06 | 515 | 487 |
| RAP1GAP   | -0.21255 | 1.13E-06 | 7.14E-06 | 515 | 515 |
| SNX33     | -0.21238 | 1.15E-06 | 7.28E-06 | 515 | 515 |
| KIF21A    | -0.21234 | 1.16E-06 | 7.31E-06 | 515 | 515 |
| UGDH      | -0.21234 | 1.16E-06 | 7.31E-06 | 515 | 515 |
| CCDC109A  | -0.2123  | 1.16E-06 | 7.34E-06 | 515 | 515 |
| LAMA5     | -0.21224 | 1.17E-06 | 7.38E-06 | 515 | 515 |
| CHML      | -0.21221 | 1.18E-06 | 7.41E-06 | 515 | 515 |
| MFAP1     | -0.21212 | 1.19E-06 | 7.48E-06 | 515 | 515 |
| ACBD6     | -0.21209 | 1.19E-06 | 7.52E-06 | 515 | 515 |
| CACNB3    | -0.21201 | 1.20E-06 | 7.58E-06 | 515 | 515 |
| HSP90AB1  | -0.21189 | 1.22E-06 | 7.68E-06 | 515 | 515 |
| ALX3      | -0.21184 | 1.23E-06 | 7.72E-06 | 515 | 515 |
| PPP1R10   | -0.21177 | 1.24E-06 | 7.78E-06 | 515 | 515 |
| KIAA0284  | -0.21169 | 1.25E-06 | 7.84E-06 | 515 | 515 |
| KIAA1984  | -0.21146 | 1.29E-06 | 8.05E-06 | 515 | 503 |
| PPP2R1A   | -0.21143 | 1.29E-06 | 8.08E-06 | 515 | 515 |
| MAP7      | -0.21133 | 1.31E-06 | 8.17E-06 | 515 | 515 |
| BTBD6     | -0.21131 | 1.31E-06 | 8.19E-06 | 515 | 515 |
| ANKRD9    | -0.21118 | 1.33E-06 | 8.30E-06 | 515 | 515 |
| PCGF2     | -0.21115 | 1.33E-06 | 8.32E-06 | 515 | 515 |
| ATP6V1C2  | -0.21099 | 1.36E-06 | 8.48E-06 | 515 | 515 |
| SFT2D3    | -0.21085 | 1.38E-06 | 8.61E-06 | 515 | 515 |
| EFNA1     | -0.21068 | 1.41E-06 | 8.77E-06 | 515 | 515 |
| COX10     | -0.21067 | 1.41E-06 | 8.78E-06 | 515 | 515 |
| C9orf119  | -0.2106  | 1.42E-06 | 8.85E-06 | 515 | 515 |
| GOLGA2    | -0.21052 | 1.44E-06 | 8.93E-06 | 515 | 515 |
| MVK       | -0.21042 | 1.45E-06 | 9.03E-06 | 515 | 515 |
| CIDEA     | -0.21041 | 1.45E-06 | 9.03E-06 | 515 | 144 |
| DHODH     | -0.2104  | 1.46E-06 | 9.04E-06 | 515 | 515 |
| CADM4     | -0.21034 | 1.47E-06 | 9.10E-06 | 515 | 515 |
| CXXC4     | -0.21016 | 1.50E-06 | 9.29E-06 | 515 | 491 |
| LOC100125 | -0.21002 | 1.52E-06 | 9.44E-06 | 515 | 515 |
| ATG4D     | -0.20996 | 1.53E-06 | 9.51E-06 | 515 | 515 |
| CAMSAP1L1 | -0.20985 | 1.55E-06 | 9.61E-06 | 515 | 515 |
| PRDX5     | -0.2098  | 1.56E-06 | 9.67E-06 | 515 | 515 |
| MCCC2     | -0.20978 | 1.57E-06 | 9.69E-06 | 515 | 515 |
| NCOA6     | -0.20968 | 1.59E-06 | 9.79E-06 | 515 | 515 |
| RREB1     | -0.20962 | 1.60E-06 | 9.86E-06 | 515 | 515 |
| PRDX6     | -0.20953 | 1.61E-06 | 9.95E-06 | 515 | 515 |
| CCDC24    | -0.20939 | 1.64E-06 | 1.01E-05 | 515 | 515 |
| ATPIF1    | -0.20937 | 1.64E-06 | 1.01E-05 | 515 | 515 |
| APOA1BP   | -0.20917 | 1.68E-06 | 1.04E-05 | 515 | 515 |
| PPP1R14B  | -0.20911 | 1.69E-06 | 1.04E-05 | 515 | 515 |
| ALG9      | -0.20899 | 1.72E-06 | 1.06E-05 | 515 | 515 |
| FH        | -0.20875 | 1.77E-06 | 1.08E-05 | 515 | 515 |

|          |          |          |          |     |     |
|----------|----------|----------|----------|-----|-----|
| ZFAND3   | -0.20875 | 1.77E-06 | 1.08E-05 | 515 | 515 |
| MYO1C    | -0.20872 | 1.77E-06 | 1.09E-05 | 515 | 515 |
| DARS2    | -0.20871 | 1.77E-06 | 1.09E-05 | 515 | 515 |
| NDUFV1   | -0.20856 | 1.81E-06 | 1.11E-05 | 515 | 515 |
| C17orf61 | -0.20853 | 1.81E-06 | 1.11E-05 | 515 | 515 |
| DHRS11   | -0.20841 | 1.84E-06 | 1.12E-05 | 515 | 515 |
| ALDH7A1  | -0.20836 | 1.85E-06 | 1.13E-05 | 515 | 515 |
| NDRG3    | -0.20816 | 1.89E-06 | 1.15E-05 | 515 | 515 |
| ZNF517   | -0.20796 | 1.94E-06 | 1.18E-05 | 515 | 515 |
| ACVR2B   | -0.20794 | 1.94E-06 | 1.18E-05 | 515 | 515 |
| LNX2     | -0.2079  | 1.95E-06 | 1.19E-05 | 515 | 515 |
| METT10D  | -0.20775 | 1.98E-06 | 1.21E-05 | 515 | 515 |
| SPDYC    | -0.20772 | 1.99E-06 | 1.21E-05 | 515 | 194 |
| PDIA4    | -0.20756 | 2.03E-06 | 1.23E-05 | 515 | 515 |
| RRP15    | -0.20754 | 2.03E-06 | 1.23E-05 | 515 | 515 |
| CELSR2   | -0.2075  | 2.04E-06 | 1.24E-05 | 515 | 515 |
| TMEM8A   | -0.20738 | 2.07E-06 | 1.26E-05 | 515 | 515 |
| NARS     | -0.20735 | 2.08E-06 | 1.26E-05 | 515 | 515 |
| INTS1    | -0.20733 | 2.08E-06 | 1.26E-05 | 515 | 515 |
| CLN3     | -0.20731 | 2.09E-06 | 1.26E-05 | 515 | 515 |
| EPN2     | -0.20714 | 2.13E-06 | 1.29E-05 | 515 | 515 |
| MTA1     | -0.2071  | 2.14E-06 | 1.29E-05 | 515 | 515 |
| C20orf11 | -0.20701 | 2.16E-06 | 1.31E-05 | 515 | 515 |
| ZFH3     | -0.20698 | 2.17E-06 | 1.31E-05 | 515 | 515 |
| MFS3     | -0.20694 | 2.18E-06 | 1.32E-05 | 515 | 515 |
| SLC3A2   | -0.20692 | 2.18E-06 | 1.32E-05 | 515 | 515 |
| GTPBP5   | -0.2069  | 2.19E-06 | 1.32E-05 | 515 | 515 |
| DOM3Z    | -0.20673 | 2.23E-06 | 1.34E-05 | 515 | 515 |
| ELAC2    | -0.20656 | 2.28E-06 | 1.37E-05 | 515 | 515 |
| PIM3     | -0.20646 | 2.30E-06 | 1.39E-05 | 515 | 515 |
| PPP2R1B  | -0.20635 | 2.33E-06 | 1.40E-05 | 515 | 515 |
| PMF1     | -0.20612 | 2.39E-06 | 1.44E-05 | 515 | 515 |
| FAM36A   | -0.20609 | 2.40E-06 | 1.44E-05 | 515 | 515 |
| OSBPL9   | -0.20595 | 2.44E-06 | 1.46E-05 | 515 | 515 |
| RBM4B    | -0.20576 | 2.50E-06 | 1.49E-05 | 515 | 515 |
| TM9SF4   | -0.20563 | 2.53E-06 | 1.51E-05 | 515 | 515 |
| TRIM45   | -0.2055  | 2.57E-06 | 1.54E-05 | 515 | 515 |
| C10orf58 | -0.20531 | 2.63E-06 | 1.57E-05 | 515 | 515 |
| MECR     | -0.20529 | 2.63E-06 | 1.57E-05 | 515 | 515 |
| SIRT5    | -0.20528 | 2.64E-06 | 1.57E-05 | 515 | 515 |
| ZSCAN16  | -0.20521 | 2.66E-06 | 1.58E-05 | 515 | 515 |
| IFT140   | -0.20521 | 2.66E-06 | 1.58E-05 | 515 | 515 |
| ANKRD39  | -0.20519 | 2.66E-06 | 1.59E-05 | 515 | 515 |
| FBXL19   | -0.20515 | 2.68E-06 | 1.59E-05 | 515 | 515 |
| GPATCH4  | -0.20513 | 2.68E-06 | 1.60E-05 | 515 | 515 |
| RPUSD3   | -0.20509 | 2.69E-06 | 1.60E-05 | 515 | 515 |
| AMN      | -0.20501 | 2.72E-06 | 1.62E-05 | 515 | 511 |
| POLR2A   | -0.20499 | 2.72E-06 | 1.62E-05 | 515 | 515 |
| F11R     | -0.20495 | 2.74E-06 | 1.63E-05 | 515 | 515 |
| HES6     | -0.20495 | 2.74E-06 | 1.63E-05 | 515 | 515 |
| URB1     | -0.20491 | 2.75E-06 | 1.63E-05 | 515 | 515 |
| NUDT15   | -0.20477 | 2.79E-06 | 1.66E-05 | 515 | 515 |
| GAS8     | -0.20467 | 2.83E-06 | 1.68E-05 | 515 | 515 |
| ANKS1A   | -0.20462 | 2.84E-06 | 1.68E-05 | 515 | 515 |

|           |          |          |          |     |     |
|-----------|----------|----------|----------|-----|-----|
| GRAMD4    | -0.20459 | 2.85E-06 | 1.69E-05 | 515 | 515 |
| LSMD1     | -0.2045  | 2.88E-06 | 1.70E-05 | 515 | 515 |
| TLL12     | -0.20447 | 2.89E-06 | 1.71E-05 | 515 | 515 |
| HSD11B1L  | -0.20436 | 2.93E-06 | 1.73E-05 | 515 | 515 |
| MIB2      | -0.20431 | 2.94E-06 | 1.74E-05 | 515 | 515 |
| CLK3      | -0.20426 | 2.96E-06 | 1.75E-05 | 515 | 515 |
| PMS2      | -0.20424 | 2.97E-06 | 1.75E-05 | 515 | 515 |
| GTF2IP1   | -0.20403 | 3.04E-06 | 1.79E-05 | 515 | 515 |
| TLCD1     | -0.20402 | 3.04E-06 | 1.79E-05 | 515 | 515 |
| C1QTNF9   | -0.20398 | 3.06E-06 | 1.80E-05 | 515 | 418 |
| C10orf2   | -0.20391 | 3.08E-06 | 1.81E-05 | 515 | 515 |
| NCRNA0023 | -0.20389 | 3.09E-06 | 1.82E-05 | 515 | 194 |
| POLD2     | -0.20382 | 3.11E-06 | 1.83E-05 | 515 | 515 |
| TFF1      | -0.20374 | 3.14E-06 | 1.85E-05 | 515 | 439 |
| SNRPE     | -0.2037  | 3.15E-06 | 1.85E-05 | 515 | 515 |
| LONP1     | -0.20367 | 3.17E-06 | 1.86E-05 | 515 | 515 |
| DNASE1    | -0.20353 | 3.22E-06 | 1.89E-05 | 515 | 515 |
| CCHCR1    | -0.2034  | 3.27E-06 | 1.91E-05 | 515 | 515 |
| GNRH2     | -0.20339 | 3.27E-06 | 1.91E-05 | 515 | 122 |
| STT3A     | -0.20338 | 3.27E-06 | 1.92E-05 | 515 | 515 |
| PTK2      | -0.20328 | 3.31E-06 | 1.94E-05 | 515 | 515 |
| SLC35C2   | -0.20311 | 3.38E-06 | 1.97E-05 | 515 | 515 |
| MEX3A     | -0.20301 | 3.41E-06 | 1.99E-05 | 515 | 515 |
| IPO4      | -0.20293 | 3.44E-06 | 2.01E-05 | 515 | 515 |
| AAAS      | -0.20275 | 3.51E-06 | 2.04E-05 | 515 | 515 |
| DNAJC11   | -0.20259 | 3.58E-06 | 2.08E-05 | 515 | 515 |
| DGCR2     | -0.20258 | 3.58E-06 | 2.08E-05 | 515 | 515 |
| ACOT13    | -0.20252 | 3.61E-06 | 2.10E-05 | 515 | 515 |
| PHKA1     | -0.20248 | 3.62E-06 | 2.10E-05 | 515 | 515 |
| MNT       | -0.20237 | 3.67E-06 | 2.13E-05 | 515 | 515 |
| PLXNB1    | -0.20229 | 3.70E-06 | 2.15E-05 | 515 | 515 |
| C6orf125  | -0.20221 | 3.73E-06 | 2.16E-05 | 515 | 515 |
| CCDC85C   | -0.20221 | 3.74E-06 | 2.16E-05 | 515 | 515 |
| DLG3      | -0.20219 | 3.74E-06 | 2.17E-05 | 515 | 515 |
| ATP2A2    | -0.20214 | 3.77E-06 | 2.18E-05 | 515 | 515 |
| FAM193A   | -0.20212 | 3.77E-06 | 2.18E-05 | 515 | 515 |
| POGZ      | -0.20211 | 3.78E-06 | 2.18E-05 | 515 | 515 |
| SARS2     | -0.20211 | 3.78E-06 | 2.18E-05 | 515 | 515 |
| IRF6      | -0.20203 | 3.81E-06 | 2.20E-05 | 515 | 515 |
| CPSF3L    | -0.20202 | 3.82E-06 | 2.20E-05 | 515 | 515 |
| TSC2      | -0.20201 | 3.82E-06 | 2.21E-05 | 515 | 515 |
| VAPA      | -0.20199 | 3.83E-06 | 2.21E-05 | 515 | 515 |
| ZFP64     | -0.20185 | 3.89E-06 | 2.24E-05 | 515 | 515 |
| TOB2      | -0.20183 | 3.90E-06 | 2.25E-05 | 515 | 515 |
| QARS      | -0.20158 | 4.01E-06 | 2.30E-05 | 515 | 515 |
| KRTCAP2   | -0.20155 | 4.02E-06 | 2.31E-05 | 515 | 515 |
| DDX54     | -0.20134 | 4.12E-06 | 2.36E-05 | 515 | 515 |
| SORD      | -0.20128 | 4.15E-06 | 2.38E-05 | 515 | 515 |
| RTN3      | -0.20124 | 4.17E-06 | 2.39E-05 | 515 | 515 |
| SDF2L1    | -0.2012  | 4.18E-06 | 2.40E-05 | 515 | 515 |
| CYB561    | -0.20103 | 4.27E-06 | 2.44E-05 | 515 | 515 |
| GFER      | -0.2009  | 4.33E-06 | 2.47E-05 | 515 | 515 |
| CYHR1     | -0.20089 | 4.33E-06 | 2.47E-05 | 515 | 515 |
| C11orf51  | -0.20086 | 4.34E-06 | 2.48E-05 | 515 | 515 |

|           |          |          |          |     |     |
|-----------|----------|----------|----------|-----|-----|
| C1orf229  | -0.20069 | 4.43E-06 | 2.53E-05 | 515 | 509 |
| FLVCR1    | -0.20064 | 4.45E-06 | 2.54E-05 | 515 | 515 |
| CBX8      | -0.20059 | 4.48E-06 | 2.55E-05 | 515 | 515 |
| MRPL38    | -0.20057 | 4.49E-06 | 2.56E-05 | 515 | 515 |
| ENDOG     | -0.20055 | 4.50E-06 | 2.56E-05 | 515 | 515 |
| MLST8     | -0.20034 | 4.61E-06 | 2.62E-05 | 515 | 515 |
| TRAF7     | -0.20033 | 4.61E-06 | 2.62E-05 | 515 | 515 |
| PCIF1     | -0.20023 | 4.66E-06 | 2.65E-05 | 515 | 515 |
| TFCP2     | -0.20022 | 4.67E-06 | 2.65E-05 | 515 | 515 |
| RANBP9    | -0.2002  | 4.68E-06 | 2.66E-05 | 515 | 515 |
| HIST1H2BN | -0.20014 | 4.71E-06 | 2.68E-05 | 515 | 514 |
| PHOX2B    | -0.2001  | 4.73E-06 | 2.69E-05 | 515 | 144 |
| MED11     | -0.2     | 4.78E-06 | 2.71E-05 | 515 | 515 |
| TAF6      | -0.19998 | 4.80E-06 | 2.72E-05 | 515 | 515 |
| PIR       | -0.19981 | 4.89E-06 | 2.77E-05 | 515 | 515 |
| INSL4     | -0.19977 | 4.91E-06 | 2.78E-05 | 515 | 239 |
| LOC151009 | -0.19962 | 4.99E-06 | 2.82E-05 | 515 | 515 |
| FAM168B   | -0.19951 | 5.06E-06 | 2.85E-05 | 515 | 515 |
| MUT       | -0.19936 | 5.14E-06 | 2.90E-05 | 515 | 515 |
| SREBF2    | -0.19901 | 5.34E-06 | 3.00E-05 | 515 | 515 |
| BAHCC1    | -0.19897 | 5.37E-06 | 3.01E-05 | 515 | 515 |
| CTDSP1    | -0.19884 | 5.45E-06 | 3.06E-05 | 515 | 515 |
| SIK2      | -0.19884 | 5.45E-06 | 3.06E-05 | 515 | 515 |
| INPP5A    | -0.19867 | 5.55E-06 | 3.10E-05 | 515 | 515 |
| LGTN      | -0.19861 | 5.58E-06 | 3.12E-05 | 515 | 515 |
| AGR2      | -0.19853 | 5.63E-06 | 3.15E-05 | 515 | 515 |
| SPAG7     | -0.19851 | 5.65E-06 | 3.16E-05 | 515 | 515 |
| TOB1      | -0.19848 | 5.66E-06 | 3.17E-05 | 515 | 515 |
| RPH3AL    | -0.19847 | 5.67E-06 | 3.17E-05 | 515 | 515 |
| C7orf27   | -0.19845 | 5.68E-06 | 3.17E-05 | 515 | 515 |
| GPR172A   | -0.19844 | 5.69E-06 | 3.18E-05 | 515 | 515 |
| H3F3A     | -0.19839 | 5.72E-06 | 3.19E-05 | 515 | 515 |
| LOC80154  | -0.19839 | 5.72E-06 | 3.19E-05 | 515 | 515 |
| TYSND1    | -0.19826 | 5.81E-06 | 3.24E-05 | 515 | 515 |
| BCR       | -0.19822 | 5.83E-06 | 3.25E-05 | 515 | 515 |
| TIGD5     | -0.19811 | 5.90E-06 | 3.29E-05 | 515 | 515 |
| LIPT2     | -0.1981  | 5.91E-06 | 3.29E-05 | 515 | 515 |
| PHF17     | -0.19802 | 5.96E-06 | 3.32E-05 | 515 | 515 |
| MAFK      | -0.19797 | 5.99E-06 | 3.34E-05 | 515 | 515 |
| C20orf70  | -0.19793 | 6.02E-06 | 3.35E-05 | 515 | 433 |
| GOLPH3    | -0.19792 | 6.02E-06 | 3.35E-05 | 515 | 515 |
| GLTPD1    | -0.19789 | 6.05E-06 | 3.36E-05 | 515 | 515 |
| ALDH3A2   | -0.19788 | 6.06E-06 | 3.37E-05 | 515 | 515 |
| POLR1C    | -0.19784 | 6.08E-06 | 3.38E-05 | 515 | 515 |
| ALG3      | -0.19773 | 6.16E-06 | 3.42E-05 | 515 | 515 |
| CBARA1    | -0.1977  | 6.18E-06 | 3.43E-05 | 515 | 515 |
| CHP       | -0.19767 | 6.19E-06 | 3.43E-05 | 515 | 515 |
| HIST1H2BA | -0.19765 | 6.21E-06 | 3.44E-05 | 515 | 76  |
| C14orf79  | -0.19764 | 6.21E-06 | 3.44E-05 | 515 | 515 |
| CDAN1     | -0.19759 | 6.25E-06 | 3.46E-05 | 515 | 515 |
| RAP1GAP2  | -0.19759 | 6.25E-06 | 3.46E-05 | 515 | 515 |
| FLRT1     | -0.19753 | 6.29E-06 | 3.48E-05 | 515 | 512 |
| PRRC1     | -0.19753 | 6.29E-06 | 3.48E-05 | 515 | 515 |
| MRPS18B   | -0.19749 | 6.32E-06 | 3.50E-05 | 515 | 515 |

|           |          |          |          |     |     |
|-----------|----------|----------|----------|-----|-----|
| FBX021    | -0.19747 | 6.33E-06 | 3.50E-05 | 515 | 515 |
| FOXJ3     | -0.19745 | 6.34E-06 | 3.51E-05 | 515 | 515 |
| HGSNAT    | -0.19741 | 6.37E-06 | 3.52E-05 | 515 | 515 |
| POLR3E    | -0.19736 | 6.41E-06 | 3.54E-05 | 515 | 515 |
| BSG       | -0.19733 | 6.43E-06 | 3.55E-05 | 515 | 515 |
| C16orf13  | -0.19731 | 6.44E-06 | 3.56E-05 | 515 | 515 |
| RAB25     | -0.1971  | 6.60E-06 | 3.64E-05 | 515 | 515 |
| ARHGEF11  | -0.19704 | 6.64E-06 | 3.66E-05 | 515 | 515 |
| HSPA1B    | -0.19697 | 6.69E-06 | 3.69E-05 | 515 | 515 |
| SLC44A5   | -0.19695 | 6.70E-06 | 3.69E-05 | 515 | 510 |
| ECHS1     | -0.19695 | 6.70E-06 | 3.69E-05 | 515 | 515 |
| FRS3      | -0.19683 | 6.80E-06 | 3.74E-05 | 515 | 515 |
| P4HB      | -0.19676 | 6.85E-06 | 3.77E-05 | 515 | 515 |
| C11orf2   | -0.19674 | 6.86E-06 | 3.77E-05 | 515 | 515 |
| RGL3      | -0.1967  | 6.89E-06 | 3.79E-05 | 515 | 515 |
| PARD3     | -0.19652 | 7.03E-06 | 3.86E-05 | 515 | 515 |
| NAIF1     | -0.19652 | 7.03E-06 | 3.86E-05 | 515 | 515 |
| C16orf53  | -0.19634 | 7.17E-06 | 3.93E-05 | 515 | 515 |
| TALDO1    | -0.19615 | 7.32E-06 | 4.00E-05 | 515 | 515 |
| PTDSS2    | -0.19609 | 7.37E-06 | 4.03E-05 | 515 | 515 |
| BEND3     | -0.19604 | 7.40E-06 | 4.05E-05 | 515 | 515 |
| CTBP1     | -0.19604 | 7.41E-06 | 4.05E-05 | 515 | 515 |
| CNPY2     | -0.19594 | 7.49E-06 | 4.09E-05 | 515 | 515 |
| SLC41A3   | -0.19594 | 7.49E-06 | 4.09E-05 | 515 | 515 |
| TKT       | -0.19586 | 7.56E-06 | 4.12E-05 | 515 | 515 |
| NDUFS5    | -0.19584 | 7.57E-06 | 4.13E-05 | 515 | 515 |
| PMVK      | -0.1958  | 7.61E-06 | 4.15E-05 | 515 | 515 |
| LCN12     | -0.19572 | 7.67E-06 | 4.18E-05 | 515 | 509 |
| SCAND1    | -0.19561 | 7.76E-06 | 4.22E-05 | 515 | 515 |
| SLC16A14  | -0.19553 | 7.84E-06 | 4.26E-05 | 515 | 515 |
| CHADL     | -0.19549 | 7.86E-06 | 4.27E-05 | 515 | 515 |
| SCAP      | -0.19546 | 7.90E-06 | 4.29E-05 | 515 | 515 |
| CHRM3     | -0.19542 | 7.93E-06 | 4.30E-05 | 515 | 504 |
| GNAS      | -0.19536 | 7.98E-06 | 4.33E-05 | 515 | 515 |
| RCN2      | -0.19532 | 8.02E-06 | 4.35E-05 | 515 | 515 |
| CYTH2     | -0.1953  | 8.03E-06 | 4.35E-05 | 515 | 515 |
| HIP1R     | -0.19517 | 8.15E-06 | 4.41E-05 | 515 | 515 |
| FBRSL1    | -0.19514 | 8.18E-06 | 4.43E-05 | 515 | 515 |
| ZC3H3     | -0.19511 | 8.20E-06 | 4.44E-05 | 515 | 515 |
| AFMID     | -0.19511 | 8.20E-06 | 4.44E-05 | 515 | 515 |
| LOC645332 | -0.1951  | 8.21E-06 | 4.44E-05 | 515 | 515 |
| RNF10     | -0.19498 | 8.32E-06 | 4.49E-05 | 515 | 515 |
| KIF9      | -0.19497 | 8.33E-06 | 4.50E-05 | 515 | 515 |
| CCDC87    | -0.19492 | 8.37E-06 | 4.52E-05 | 515 | 514 |
| ZNF513    | -0.19466 | 8.61E-06 | 4.65E-05 | 515 | 515 |
| CPT2      | -0.19462 | 8.65E-06 | 4.66E-05 | 515 | 515 |
| FIZ1      | -0.19459 | 8.68E-06 | 4.68E-05 | 515 | 515 |
| TSR2      | -0.19451 | 8.75E-06 | 4.71E-05 | 515 | 515 |
| KIAA1598  | -0.19451 | 8.75E-06 | 4.71E-05 | 515 | 515 |
| ZBTB41    | -0.19448 | 8.78E-06 | 4.72E-05 | 515 | 515 |
| GOT2      | -0.19433 | 8.92E-06 | 4.79E-05 | 515 | 515 |
| ZNF446    | -0.19431 | 8.95E-06 | 4.80E-05 | 515 | 515 |
| LRP6      | -0.19422 | 9.03E-06 | 4.84E-05 | 515 | 515 |
| SAFB      | -0.19399 | 9.26E-06 | 4.95E-05 | 515 | 515 |

|           |          |          |          |     |     |
|-----------|----------|----------|----------|-----|-----|
| NCL       | -0.19392 | 9.32E-06 | 4.99E-05 | 515 | 515 |
| LOC100270 | -0.19386 | 9.39E-06 | 5.02E-05 | 515 | 515 |
| LEO1      | -0.19385 | 9.40E-06 | 5.02E-05 | 515 | 515 |
| BRD2      | -0.19382 | 9.43E-06 | 5.04E-05 | 515 | 515 |
| DEGS2     | -0.19364 | 9.62E-06 | 5.13E-05 | 515 | 515 |
| FAM184B   | -0.1935  | 9.76E-06 | 5.20E-05 | 515 | 422 |
| DPM3      | -0.19342 | 9.84E-06 | 5.24E-05 | 515 | 515 |
| ZFPL1     | -0.19342 | 9.84E-06 | 5.24E-05 | 515 | 515 |
| TM9SF1    | -0.19339 | 9.88E-06 | 5.26E-05 | 515 | 515 |
| ST6GALNAC | -0.19334 | 9.93E-06 | 5.28E-05 | 515 | 515 |
| SETD8     | -0.19333 | 9.94E-06 | 5.29E-05 | 515 | 515 |
| KIAA0195  | -0.19306 | 1.02E-05 | 5.44E-05 | 515 | 515 |
| FAM119A   | -0.19297 | 1.03E-05 | 5.48E-05 | 515 | 515 |
| SETD1A    | -0.19288 | 1.04E-05 | 5.53E-05 | 515 | 515 |
| MYCN      | -0.19287 | 1.04E-05 | 5.54E-05 | 515 | 513 |
| HOOK1     | -0.19278 | 1.05E-05 | 5.59E-05 | 515 | 515 |
| COPA      | -0.19267 | 1.07E-05 | 5.65E-05 | 515 | 515 |
| SLC25A23  | -0.1925  | 1.09E-05 | 5.75E-05 | 515 | 515 |
| VPS37D    | -0.19247 | 1.09E-05 | 5.76E-05 | 515 | 515 |
| SENP3     | -0.19246 | 1.09E-05 | 5.77E-05 | 515 | 515 |
| SLC15A1   | -0.19238 | 1.10E-05 | 5.82E-05 | 515 | 470 |
| SAC3D1    | -0.19233 | 1.11E-05 | 5.84E-05 | 515 | 515 |
| LRP11     | -0.19232 | 1.11E-05 | 5.85E-05 | 515 | 515 |
| PIGF      | -0.19232 | 1.11E-05 | 5.85E-05 | 515 | 515 |
| PAFAH1B3  | -0.19228 | 1.11E-05 | 5.87E-05 | 515 | 515 |
| LCLAT1    | -0.19225 | 1.12E-05 | 5.89E-05 | 515 | 515 |
| ZFYVE9    | -0.19219 | 1.12E-05 | 5.92E-05 | 515 | 515 |
| LOC143666 | -0.19201 | 1.15E-05 | 6.03E-05 | 515 | 515 |
| CA14      | -0.19186 | 1.16E-05 | 6.12E-05 | 515 | 514 |
| NDUFS1    | -0.19173 | 1.18E-05 | 6.20E-05 | 515 | 515 |
| RERE      | -0.19173 | 1.18E-05 | 6.20E-05 | 515 | 515 |
| MST1      | -0.19167 | 1.19E-05 | 6.23E-05 | 515 | 515 |
| C4orf14   | -0.19163 | 1.19E-05 | 6.26E-05 | 515 | 515 |
| ATP1A1    | -0.19139 | 1.22E-05 | 6.40E-05 | 515 | 515 |
| IDI2      | -0.19133 | 1.23E-05 | 6.44E-05 | 515 | 515 |
| FAM84A    | -0.19125 | 1.24E-05 | 6.49E-05 | 515 | 515 |
| MDH2      | -0.19125 | 1.24E-05 | 6.49E-05 | 515 | 515 |
| GPT       | -0.19115 | 1.26E-05 | 6.56E-05 | 515 | 510 |
| KIAA0146  | -0.19111 | 1.26E-05 | 6.58E-05 | 515 | 515 |
| PCBD1     | -0.19109 | 1.26E-05 | 6.59E-05 | 515 | 515 |
| TFAP4     | -0.19104 | 1.27E-05 | 6.63E-05 | 515 | 515 |
| GABRR1    | -0.191   | 1.28E-05 | 6.65E-05 | 515 | 304 |
| FZD3      | -0.19099 | 1.28E-05 | 6.65E-05 | 515 | 515 |
| NINL      | -0.19097 | 1.28E-05 | 6.66E-05 | 515 | 515 |
| MTUS1     | -0.19084 | 1.30E-05 | 6.76E-05 | 515 | 515 |
| C6orf48   | -0.19065 | 1.32E-05 | 6.89E-05 | 515 | 515 |
| ECH1      | -0.1905  | 1.35E-05 | 6.99E-05 | 515 | 515 |
| VWA1      | -0.19048 | 1.35E-05 | 7.00E-05 | 515 | 515 |
| HSDL1     | -0.1904  | 1.36E-05 | 7.06E-05 | 515 | 515 |
| SYT7      | -0.19039 | 1.36E-05 | 7.06E-05 | 515 | 515 |
| GNL2      | -0.19036 | 1.37E-05 | 7.08E-05 | 515 | 515 |
| WDR46     | -0.19034 | 1.37E-05 | 7.09E-05 | 515 | 515 |
| C1orf210  | -0.19032 | 1.37E-05 | 7.10E-05 | 515 | 515 |
| YDJC      | -0.19032 | 1.37E-05 | 7.11E-05 | 515 | 515 |



|           |          |          |          |     |     |
|-----------|----------|----------|----------|-----|-----|
| C1orf86   | -0.19024 | 1.38E-05 | 7.15E-05 | 515 | 515 |
| KCNU1     | -0.19024 | 1.38E-05 | 7.16E-05 | 515 | 169 |
| C17orf63  | -0.1901  | 1.40E-05 | 7.26E-05 | 515 | 515 |
| WDR34     | -0.18997 | 1.42E-05 | 7.35E-05 | 515 | 515 |
| CHRNA5    | -0.18997 | 1.42E-05 | 7.35E-05 | 515 | 515 |
| USP22     | -0.1898  | 1.45E-05 | 7.47E-05 | 515 | 515 |
| ACSL3     | -0.1898  | 1.45E-05 | 7.47E-05 | 515 | 515 |
| FAM18B2   | -0.18966 | 1.47E-05 | 7.57E-05 | 515 | 515 |
| MTX1      | -0.18955 | 1.49E-05 | 7.65E-05 | 515 | 515 |
| GGT7      | -0.18947 | 1.50E-05 | 7.71E-05 | 515 | 515 |
| DLX4      | -0.18947 | 1.50E-05 | 7.71E-05 | 515 | 515 |
| MVD       | -0.18945 | 1.50E-05 | 7.72E-05 | 515 | 515 |
| SLC35A2   | -0.18931 | 1.53E-05 | 7.83E-05 | 515 | 515 |
| RAB3IP    | -0.1893  | 1.53E-05 | 7.83E-05 | 515 | 515 |
| SLC7A11   | -0.18928 | 1.53E-05 | 7.85E-05 | 515 | 515 |
| PPP1R3D   | -0.18924 | 1.54E-05 | 7.88E-05 | 515 | 515 |
| RRBP1     | -0.18915 | 1.55E-05 | 7.95E-05 | 515 | 515 |
| FIP1L1    | -0.18915 | 1.55E-05 | 7.95E-05 | 515 | 515 |
| KLHL12    | -0.18914 | 1.55E-05 | 7.95E-05 | 515 | 515 |
| SERINC2   | -0.18913 | 1.56E-05 | 7.96E-05 | 515 | 515 |
| SLC39A4   | -0.18912 | 1.56E-05 | 7.96E-05 | 515 | 515 |
| ZNF692    | -0.1891  | 1.56E-05 | 7.98E-05 | 515 | 515 |
| RNMTL1    | -0.18896 | 1.58E-05 | 8.09E-05 | 515 | 515 |
| PARS2     | -0.1889  | 1.59E-05 | 8.14E-05 | 515 | 515 |
| MANSC1    | -0.18886 | 1.60E-05 | 8.17E-05 | 515 | 515 |
| ENTPD8    | -0.18882 | 1.61E-05 | 8.20E-05 | 515 | 509 |
| MFSD9     | -0.18874 | 1.62E-05 | 8.27E-05 | 515 | 515 |
| IMPDH2    | -0.18854 | 1.66E-05 | 8.43E-05 | 515 | 515 |
| CDC42BPB  | -0.18852 | 1.66E-05 | 8.45E-05 | 515 | 515 |
| FBXO22OS  | -0.18846 | 1.67E-05 | 8.50E-05 | 515 | 515 |
| TBCE      | -0.18838 | 1.68E-05 | 8.57E-05 | 515 | 515 |
| CHMP1B    | -0.18837 | 1.69E-05 | 8.57E-05 | 515 | 515 |
| PRKAB1    | -0.18835 | 1.69E-05 | 8.58E-05 | 515 | 515 |
| C19orf63  | -0.18827 | 1.70E-05 | 8.65E-05 | 515 | 515 |
| TMEM11    | -0.18816 | 1.72E-05 | 8.75E-05 | 515 | 515 |
| MRPL23    | -0.18803 | 1.75E-05 | 8.85E-05 | 515 | 515 |
| NEK8      | -0.18791 | 1.77E-05 | 8.95E-05 | 515 | 515 |
| TMEM223   | -0.18787 | 1.78E-05 | 8.99E-05 | 515 | 515 |
| HAL       | -0.18782 | 1.78E-05 | 9.03E-05 | 515 | 514 |
| NT5M      | -0.18773 | 1.80E-05 | 9.11E-05 | 515 | 515 |
| UBE4B     | -0.18761 | 1.82E-05 | 9.22E-05 | 515 | 515 |
| WBSCR16   | -0.18756 | 1.83E-05 | 9.26E-05 | 515 | 515 |
| GAK       | -0.18752 | 1.84E-05 | 9.30E-05 | 515 | 515 |
| LOC100128 | -0.18749 | 1.85E-05 | 9.32E-05 | 515 | 477 |
| EIF3B     | -0.18735 | 1.87E-05 | 9.45E-05 | 515 | 515 |
| AMIGO3    | -0.18733 | 1.88E-05 | 9.48E-05 | 515 | 515 |
| TLE2      | -0.18726 | 1.89E-05 | 9.53E-05 | 515 | 515 |
| PIK3R2    | -0.18724 | 1.90E-05 | 9.55E-05 | 515 | 515 |
| HS6ST1    | -0.18721 | 1.90E-05 | 9.58E-05 | 515 | 515 |
| PDIA6     | -0.1872  | 1.91E-05 | 9.59E-05 | 515 | 515 |
| TST       | -0.18711 | 1.92E-05 | 9.66E-05 | 515 | 515 |
| WASH3P    | -0.18706 | 1.93E-05 | 9.71E-05 | 515 | 515 |
| MYO5C     | -0.18706 | 1.93E-05 | 9.71E-05 | 515 | 515 |
| IPO9      | -0.18691 | 1.96E-05 | 9.84E-05 | 515 | 515 |

|          |          |          |          |     |     |
|----------|----------|----------|----------|-----|-----|
| ZMYND8   | -0.18689 | 1.97E-05 | 9.87E-05 | 515 | 515 |
| RIOK1    | -0.18688 | 1.97E-05 | 9.87E-05 | 515 | 515 |
| CITED4   | -0.18684 | 1.98E-05 | 9.91E-05 | 515 | 515 |
| TSEN34   | -0.18657 | 2.03E-05 | 0.000102 | 515 | 515 |
| MIF      | -0.18655 | 2.04E-05 | 0.000102 | 515 | 515 |
| EEF1E1   | -0.18651 | 2.05E-05 | 0.000102 | 515 | 515 |
| NCKIPSD  | -0.18644 | 2.06E-05 | 0.000103 | 515 | 515 |
| BZW2     | -0.1863  | 2.09E-05 | 0.000104 | 515 | 515 |
| RNF167   | -0.18626 | 2.10E-05 | 0.000105 | 515 | 515 |
| GLRX5    | -0.18612 | 2.13E-05 | 0.000106 | 515 | 515 |
| BGLAP    | -0.18612 | 2.13E-05 | 0.000106 | 515 | 515 |
| LRRC16A  | -0.18607 | 2.14E-05 | 0.000107 | 515 | 515 |
| MUC2     | -0.18602 | 2.15E-05 | 0.000107 | 515 | 356 |
| MKS1     | -0.18588 | 2.18E-05 | 0.000109 | 515 | 515 |
| SYCP2L   | -0.18575 | 2.22E-05 | 0.00011  | 515 | 478 |
| ERBB3    | -0.18574 | 2.22E-05 | 0.00011  | 515 | 515 |
| TRAF3IP1 | -0.1857  | 2.23E-05 | 0.00011  | 515 | 515 |
| AKR7L    | -0.18559 | 2.25E-05 | 0.000112 | 515 | 514 |
| PRRG2    | -0.18558 | 2.25E-05 | 0.000112 | 515 | 515 |
| AFG3L2   | -0.18556 | 2.26E-05 | 0.000112 | 515 | 515 |
| DNAJB2   | -0.18554 | 2.26E-05 | 0.000112 | 515 | 515 |
| PGD      | -0.18553 | 2.27E-05 | 0.000112 | 515 | 515 |
| LOC93622 | -0.18547 | 2.28E-05 | 0.000113 | 515 | 515 |
| PPIL2    | -0.1854  | 2.30E-05 | 0.000113 | 515 | 515 |
| ADNP     | -0.18527 | 2.33E-05 | 0.000115 | 515 | 515 |
| EIF4G1   | -0.18513 | 2.36E-05 | 0.000116 | 515 | 515 |
| ARFIP2   | -0.18508 | 2.37E-05 | 0.000117 | 515 | 515 |
| SIK1     | -0.185   | 2.39E-05 | 0.000118 | 515 | 515 |
| ZNF48    | -0.1849  | 2.42E-05 | 0.000119 | 515 | 515 |
| HSBP1L1  | -0.18485 | 2.43E-05 | 0.000119 | 515 | 515 |
| HDGF     | -0.1848  | 2.44E-05 | 0.00012  | 515 | 515 |
| SMARCC1  | -0.18465 | 2.48E-05 | 0.000122 | 515 | 515 |
| PRKCZ    | -0.18463 | 2.49E-05 | 0.000122 | 515 | 515 |
| GALNTL6  | -0.18458 | 2.50E-05 | 0.000122 | 515 | 397 |
| GEMIN4   | -0.18458 | 2.50E-05 | 0.000122 | 515 | 515 |
| ACY1     | -0.18453 | 2.51E-05 | 0.000123 | 515 | 515 |
| CYP51A1  | -0.18451 | 2.52E-05 | 0.000123 | 515 | 515 |
| GNRHR2   | -0.18449 | 2.52E-05 | 0.000123 | 515 | 515 |
| C2orf68  | -0.18448 | 2.52E-05 | 0.000123 | 515 | 515 |
| MARK4    | -0.18444 | 2.54E-05 | 0.000124 | 515 | 515 |
| POMGNT1  | -0.18441 | 2.54E-05 | 0.000124 | 515 | 515 |
| CCS      | -0.1844  | 2.55E-05 | 0.000124 | 515 | 515 |
| TSTD1    | -0.18435 | 2.56E-05 | 0.000125 | 515 | 515 |
| RNF220   | -0.1843  | 2.57E-05 | 0.000126 | 515 | 515 |
| PLEKHA8  | -0.18421 | 2.60E-05 | 0.000127 | 515 | 515 |
| C6orf47  | -0.18417 | 2.61E-05 | 0.000127 | 515 | 515 |
| PRPF19   | -0.18403 | 2.64E-05 | 0.000129 | 515 | 515 |
| AIFM1    | -0.18403 | 2.64E-05 | 0.000129 | 515 | 515 |
| BCOR     | -0.18395 | 2.67E-05 | 0.00013  | 515 | 515 |
| PTPRF    | -0.1838  | 2.71E-05 | 0.000132 | 515 | 515 |
| COG3     | -0.18379 | 2.71E-05 | 0.000132 | 515 | 515 |
| CARD14   | -0.18376 | 2.72E-05 | 0.000132 | 515 | 515 |
| MRPL19   | -0.18361 | 2.76E-05 | 0.000134 | 515 | 515 |
| TEX261   | -0.18356 | 2.77E-05 | 0.000135 | 515 | 515 |

|           |          |          |          |     |     |
|-----------|----------|----------|----------|-----|-----|
| SERF2     | -0.18353 | 2.78E-05 | 0.000135 | 515 | 515 |
| FAM18B    | -0.18346 | 2.80E-05 | 0.000136 | 515 | 515 |
| HEATR2    | -0.18343 | 2.81E-05 | 0.000136 | 515 | 515 |
| TMEM41B   | -0.18337 | 2.83E-05 | 0.000137 | 515 | 515 |
| GPRC5C    | -0.18328 | 2.85E-05 | 0.000138 | 515 | 515 |
| ARL8A     | -0.18324 | 2.87E-05 | 0.000139 | 515 | 515 |
| DDRGK1    | -0.1831  | 2.91E-05 | 0.000141 | 515 | 515 |
| EPB41L1   | -0.18304 | 2.93E-05 | 0.000142 | 515 | 515 |
| HOXC5     | -0.18295 | 2.95E-05 | 0.000143 | 515 | 481 |
| SLC14A2   | -0.18293 | 2.96E-05 | 0.000143 | 515 | 434 |
| TCEB3B    | -0.18287 | 2.98E-05 | 0.000144 | 515 | 232 |
| SLC10A4   | -0.18286 | 2.98E-05 | 0.000144 | 515 | 497 |
| BMPRI1A   | -0.18286 | 2.98E-05 | 0.000144 | 515 | 515 |
| LRRC56    | -0.18284 | 2.99E-05 | 0.000144 | 515 | 515 |
| INE2      | -0.18276 | 3.01E-05 | 0.000145 | 515 | 346 |
| CECR4     | -0.18263 | 3.05E-05 | 0.000147 | 515 | 434 |
| SLC5A6    | -0.18238 | 3.13E-05 | 0.000151 | 515 | 515 |
| PXMP2     | -0.18237 | 3.13E-05 | 0.000151 | 515 | 515 |
| NT5C      | -0.18228 | 3.16E-05 | 0.000152 | 515 | 515 |
| FAM53A    | -0.18227 | 3.16E-05 | 0.000152 | 515 | 513 |
| MRPS9     | -0.18208 | 3.23E-05 | 0.000155 | 515 | 515 |
| RCOR3     | -0.18208 | 3.23E-05 | 0.000155 | 515 | 515 |
| PHF16     | -0.18205 | 3.24E-05 | 0.000155 | 515 | 515 |
| SLC38A10  | -0.18205 | 3.24E-05 | 0.000155 | 515 | 515 |
| ARNT      | -0.18204 | 3.24E-05 | 0.000155 | 515 | 515 |
| AS3MT     | -0.18193 | 3.28E-05 | 0.000157 | 515 | 515 |
| FOXK2     | -0.18135 | 3.48E-05 | 0.000166 | 515 | 515 |
| SLC25A15  | -0.18128 | 3.50E-05 | 0.000167 | 515 | 515 |
| VAX1      | -0.1812  | 3.53E-05 | 0.000168 | 515 | 128 |
| ZC3H11A   | -0.18117 | 3.54E-05 | 0.000168 | 515 | 515 |
| HN1L      | -0.18117 | 3.54E-05 | 0.000168 | 515 | 515 |
| KLC2      | -0.18108 | 3.57E-05 | 0.00017  | 515 | 515 |
| ITPA      | -0.181   | 3.60E-05 | 0.000171 | 515 | 515 |
| ADRM1     | -0.18091 | 3.63E-05 | 0.000173 | 515 | 515 |
| RBM10     | -0.18088 | 3.64E-05 | 0.000173 | 515 | 515 |
| C18orf45  | -0.18088 | 3.65E-05 | 0.000173 | 515 | 515 |
| LOC100133 | -0.18082 | 3.67E-05 | 0.000174 | 515 | 512 |
| ZMYND19   | -0.18081 | 3.67E-05 | 0.000174 | 515 | 515 |
| ACP1      | -0.1808  | 3.67E-05 | 0.000174 | 515 | 515 |
| ZNF362    | -0.18078 | 3.68E-05 | 0.000174 | 515 | 515 |
| TRIM16L   | -0.18071 | 3.71E-05 | 0.000175 | 515 | 515 |
| DPP3      | -0.18067 | 3.72E-05 | 0.000176 | 515 | 515 |
| EIF5B     | -0.18067 | 3.72E-05 | 0.000176 | 515 | 515 |
| LAPTM4B   | -0.18061 | 3.74E-05 | 0.000177 | 515 | 515 |
| CCAR1     | -0.1806  | 3.75E-05 | 0.000177 | 515 | 515 |
| STAU1     | -0.18051 | 3.78E-05 | 0.000179 | 515 | 515 |
| FAM46A    | -0.18047 | 3.80E-05 | 0.000179 | 515 | 515 |
| C11orf52  | -0.18042 | 3.82E-05 | 0.00018  | 515 | 515 |
| SPSB2     | -0.18036 | 3.84E-05 | 0.000181 | 515 | 515 |
| PPAP2C    | -0.18033 | 3.85E-05 | 0.000182 | 515 | 515 |
| C4orf42   | -0.18026 | 3.88E-05 | 0.000183 | 515 | 515 |
| LOC100128 | -0.18016 | 3.92E-05 | 0.000185 | 515 | 515 |
| NPRL3     | -0.18015 | 3.92E-05 | 0.000185 | 515 | 515 |
| CABC1     | -0.18004 | 3.97E-05 | 0.000187 | 515 | 515 |

|           |          |          |          |     |     |
|-----------|----------|----------|----------|-----|-----|
| LOC92659  | -0.18003 | 3.97E-05 | 0.000187 | 515 | 515 |
| UBN2      | -0.17998 | 3.99E-05 | 0.000188 | 515 | 515 |
| SLTM      | -0.17998 | 3.99E-05 | 0.000188 | 515 | 515 |
| LRRC8E    | -0.17998 | 3.99E-05 | 0.000188 | 515 | 515 |
| PPP1R13B  | -0.17992 | 4.01E-05 | 0.000189 | 515 | 515 |
| SIP1L3    | -0.1799  | 4.02E-05 | 0.000189 | 515 | 515 |
| C6orf154  | -0.17988 | 4.03E-05 | 0.000189 | 515 | 513 |
| IWS1      | -0.17987 | 4.03E-05 | 0.000189 | 515 | 515 |
| TMEM161A  | -0.17984 | 4.04E-05 | 0.00019  | 515 | 515 |
| MRPS34    | -0.1798  | 4.06E-05 | 0.00019  | 515 | 515 |
| TIMM17B   | -0.17973 | 4.09E-05 | 0.000192 | 515 | 515 |
| B3GALT6   | -0.17973 | 4.09E-05 | 0.000192 | 515 | 515 |
| KRT18     | -0.17967 | 4.11E-05 | 0.000193 | 515 | 515 |
| FKBPL     | -0.17961 | 4.14E-05 | 0.000194 | 515 | 515 |
| CASKIN2   | -0.17952 | 4.18E-05 | 0.000195 | 515 | 515 |
| ATRN      | -0.17948 | 4.19E-05 | 0.000196 | 515 | 515 |
| GMDS      | -0.17942 | 4.22E-05 | 0.000197 | 515 | 515 |
| MSMB      | -0.17934 | 4.25E-05 | 0.000198 | 515 | 478 |
| UBL7      | -0.17932 | 4.26E-05 | 0.000199 | 515 | 515 |
| FLYWCH2   | -0.17928 | 4.28E-05 | 0.000199 | 515 | 515 |
| HUNK      | -0.17925 | 4.29E-05 | 0.0002   | 515 | 515 |
| YARS      | -0.17924 | 4.30E-05 | 0.0002   | 515 | 515 |
| SMPDL3B   | -0.17923 | 4.30E-05 | 0.0002   | 515 | 515 |
| LYPLA2    | -0.1791  | 4.36E-05 | 0.000202 | 515 | 515 |
| DHX34     | -0.17903 | 4.39E-05 | 0.000204 | 515 | 515 |
| DOHH      | -0.17902 | 4.39E-05 | 0.000204 | 515 | 515 |
| GATSL3    | -0.17897 | 4.41E-05 | 0.000205 | 515 | 515 |
| GOLM1     | -0.17895 | 4.42E-05 | 0.000205 | 515 | 515 |
| PARG      | -0.17895 | 4.42E-05 | 0.000205 | 515 | 515 |
| NECAB2    | -0.17893 | 4.43E-05 | 0.000206 | 515 | 459 |
| DBT       | -0.1789  | 4.44E-05 | 0.000206 | 515 | 515 |
| ZNF629    | -0.17882 | 4.48E-05 | 0.000207 | 515 | 515 |
| CBX4      | -0.1788  | 4.49E-05 | 0.000208 | 515 | 515 |
| DTNB      | -0.17864 | 4.56E-05 | 0.000211 | 515 | 515 |
| AGPAT1    | -0.17859 | 4.59E-05 | 0.000212 | 515 | 515 |
| UPF3A     | -0.17855 | 4.60E-05 | 0.000213 | 515 | 515 |
| TRPT1     | -0.17839 | 4.68E-05 | 0.000216 | 515 | 515 |
| PIGP      | -0.17831 | 4.71E-05 | 0.000217 | 515 | 515 |
| MRS2      | -0.17831 | 4.72E-05 | 0.000217 | 515 | 515 |
| LOC643387 | -0.17831 | 4.72E-05 | 0.000217 | 515 | 515 |
| SETD4     | -0.1783  | 4.72E-05 | 0.000217 | 515 | 515 |
| CCDC9     | -0.17827 | 4.74E-05 | 0.000218 | 515 | 515 |
| NUDT9     | -0.17826 | 4.74E-05 | 0.000218 | 515 | 515 |
| STAU2     | -0.17817 | 4.78E-05 | 0.00022  | 515 | 515 |
| ELAVL1    | -0.17816 | 4.79E-05 | 0.00022  | 515 | 515 |
| NKIRAS2   | -0.17815 | 4.79E-05 | 0.00022  | 515 | 515 |
| C1orf226  | -0.17814 | 4.80E-05 | 0.00022  | 515 | 515 |
| ACADVL    | -0.17813 | 4.80E-05 | 0.000221 | 515 | 515 |
| RUSC1     | -0.1781  | 4.82E-05 | 0.000221 | 515 | 515 |
| SH3YL1    | -0.17799 | 4.87E-05 | 0.000223 | 515 | 515 |
| LRPPRC    | -0.17779 | 4.96E-05 | 0.000227 | 515 | 515 |
| TMEM177   | -0.17778 | 4.97E-05 | 0.000228 | 515 | 515 |
| C15orf39  | -0.17774 | 4.99E-05 | 0.000228 | 515 | 515 |
| LYPLA2P1  | -0.17769 | 5.01E-05 | 0.000229 | 515 | 515 |

|          |          |          |          |     |     |
|----------|----------|----------|----------|-----|-----|
| SEMA4G   | -0.17768 | 5.02E-05 | 0.000229 | 515 | 515 |
| SNAP47   | -0.17767 | 5.03E-05 | 0.00023  | 515 | 515 |
| AIMP2    | -0.17767 | 5.03E-05 | 0.00023  | 515 | 515 |
| PFDN2    | -0.17759 | 5.07E-05 | 0.000231 | 515 | 515 |
| HRAS     | -0.17747 | 5.13E-05 | 0.000234 | 515 | 515 |
| SGSM1    | -0.17746 | 5.13E-05 | 0.000234 | 515 | 515 |
| CLVS2    | -0.17736 | 5.18E-05 | 0.000236 | 515 | 47  |
| ZNF281   | -0.17715 | 5.29E-05 | 0.000241 | 515 | 515 |
| KLHL35   | -0.177   | 5.37E-05 | 0.000244 | 515 | 515 |
| EXD3     | -0.17678 | 5.49E-05 | 0.000249 | 515 | 515 |
| EXOSC4   | -0.17669 | 5.54E-05 | 0.000251 | 515 | 515 |
| TOP1MT   | -0.17668 | 5.54E-05 | 0.000251 | 515 | 515 |
| E4F1     | -0.17667 | 5.55E-05 | 0.000251 | 515 | 515 |
| NFYC     | -0.17664 | 5.56E-05 | 0.000252 | 515 | 515 |
| KDELR1   | -0.17662 | 5.57E-05 | 0.000252 | 515 | 515 |
| ADCK5    | -0.17637 | 5.71E-05 | 0.000258 | 515 | 515 |
| SGSM3    | -0.17631 | 5.75E-05 | 0.00026  | 515 | 515 |
| AKR7A3   | -0.17631 | 5.75E-05 | 0.00026  | 515 | 513 |
| FAM110A  | -0.17625 | 5.78E-05 | 0.000261 | 515 | 515 |
| C19orf54 | -0.17625 | 5.78E-05 | 0.000261 | 515 | 515 |
| PIP5K1A  | -0.17622 | 5.80E-05 | 0.000262 | 515 | 515 |
| FAM117B  | -0.17612 | 5.86E-05 | 0.000264 | 515 | 515 |
| DHX9     | -0.17611 | 5.86E-05 | 0.000265 | 515 | 515 |
| GGPS1    | -0.17605 | 5.90E-05 | 0.000266 | 515 | 515 |
| VGLL4    | -0.17603 | 5.91E-05 | 0.000266 | 515 | 515 |
| MED20    | -0.17599 | 5.93E-05 | 0.000267 | 515 | 515 |
| C17orf97 | -0.17593 | 5.97E-05 | 0.000269 | 515 | 515 |
| SS18L1   | -0.17588 | 6.00E-05 | 0.00027  | 515 | 515 |
| UOX      | -0.17585 | 6.01E-05 | 0.000271 | 515 | 299 |
| DUS1L    | -0.17583 | 6.03E-05 | 0.000271 | 515 | 515 |
| MRPL2    | -0.17564 | 6.14E-05 | 0.000276 | 515 | 515 |
| ITIH5L   | -0.17556 | 6.18E-05 | 0.000278 | 515 | 368 |
| KIAA2013 | -0.17555 | 6.20E-05 | 0.000278 | 515 | 515 |
| FBXO46   | -0.17554 | 6.20E-05 | 0.000278 | 515 | 515 |
| RFX1     | -0.17549 | 6.23E-05 | 0.000279 | 515 | 515 |
| PDHA1    | -0.17549 | 6.23E-05 | 0.00028  | 515 | 515 |
| NRTN     | -0.17548 | 6.24E-05 | 0.00028  | 515 | 512 |
| SUPT3H   | -0.1754  | 6.29E-05 | 0.000282 | 515 | 515 |
| SUOX     | -0.17538 | 6.30E-05 | 0.000282 | 515 | 515 |
| SESTD1   | -0.17533 | 6.33E-05 | 0.000283 | 515 | 515 |
| SH2D6    | -0.17529 | 6.35E-05 | 0.000284 | 515 | 406 |
| SUDS3    | -0.17522 | 6.39E-05 | 0.000286 | 515 | 515 |
| SQLE     | -0.1752  | 6.41E-05 | 0.000287 | 515 | 515 |
| TMC01    | -0.17513 | 6.46E-05 | 0.000289 | 515 | 515 |
| SDHA     | -0.17512 | 6.46E-05 | 0.000289 | 515 | 515 |
| HSPB9    | -0.17511 | 6.47E-05 | 0.000289 | 515 | 489 |
| IGSF3    | -0.1751  | 6.47E-05 | 0.000289 | 515 | 515 |
| ATIC     | -0.17508 | 6.49E-05 | 0.00029  | 515 | 515 |
| DGCR11   | -0.17498 | 6.55E-05 | 0.000292 | 515 | 515 |
| OSGIN1   | -0.17492 | 6.59E-05 | 0.000294 | 515 | 515 |
| EFNA4    | -0.17485 | 6.63E-05 | 0.000295 | 515 | 515 |
| ST13     | -0.17485 | 6.63E-05 | 0.000295 | 515 | 515 |
| SNRNP200 | -0.17483 | 6.65E-05 | 0.000296 | 515 | 515 |
| BCAS1    | -0.17472 | 6.72E-05 | 0.000298 | 515 | 513 |

|           |          |          |          |     |     |
|-----------|----------|----------|----------|-----|-----|
| CLDN3     | -0.17471 | 6.72E-05 | 0.000299 | 515 | 515 |
| TMUB1     | -0.17462 | 6.78E-05 | 0.000301 | 515 | 515 |
| SRP9      | -0.17459 | 6.80E-05 | 0.000302 | 515 | 515 |
| DDX51     | -0.17458 | 6.81E-05 | 0.000302 | 515 | 515 |
| CHID1     | -0.17457 | 6.82E-05 | 0.000303 | 515 | 515 |
| ZKSCAN2   | -0.17457 | 6.82E-05 | 0.000303 | 515 | 515 |
| FAM134A   | -0.17455 | 6.83E-05 | 0.000303 | 515 | 515 |
| XPO5      | -0.17454 | 6.83E-05 | 0.000303 | 515 | 515 |
| LZTS2     | -0.17454 | 6.84E-05 | 0.000303 | 515 | 515 |
| PCBP4     | -0.17449 | 6.87E-05 | 0.000304 | 515 | 515 |
| YTHDF1    | -0.17446 | 6.89E-05 | 0.000305 | 515 | 515 |
| RNF215    | -0.17445 | 6.90E-05 | 0.000306 | 515 | 515 |
| ILF3      | -0.17444 | 6.90E-05 | 0.000306 | 515 | 515 |
| MSTO1     | -0.17442 | 6.92E-05 | 0.000306 | 515 | 515 |
| STIP1     | -0.17439 | 6.94E-05 | 0.000307 | 515 | 515 |
| AGAP1     | -0.17432 | 6.98E-05 | 0.000309 | 515 | 515 |
| RBM14     | -0.17421 | 7.06E-05 | 0.000312 | 515 | 515 |
| TJP1      | -0.17403 | 7.18E-05 | 0.000317 | 515 | 515 |
| TTY14     | -0.17403 | 7.19E-05 | 0.000317 | 515 | 205 |
| UBTF      | -0.17396 | 7.23E-05 | 0.000319 | 515 | 515 |
| OPN3      | -0.17391 | 7.27E-05 | 0.00032  | 515 | 515 |
| PTS       | -0.17388 | 7.29E-05 | 0.000321 | 515 | 515 |
| DPH1      | -0.17381 | 7.34E-05 | 0.000323 | 515 | 515 |
| EARS2     | -0.17381 | 7.34E-05 | 0.000323 | 515 | 515 |
| MMACHC    | -0.17374 | 7.39E-05 | 0.000325 | 515 | 515 |
| ATL2      | -0.17374 | 7.39E-05 | 0.000325 | 515 | 515 |
| GNPAT     | -0.17353 | 7.54E-05 | 0.000331 | 515 | 515 |
| KRTAP5-1  | -0.17348 | 7.58E-05 | 0.000333 | 515 | 505 |
| BPIL1     | -0.17347 | 7.59E-05 | 0.000333 | 515 | 410 |
| LOC647979 | -0.17344 | 7.61E-05 | 0.000334 | 515 | 515 |
| PAPOLA    | -0.17337 | 7.66E-05 | 0.000336 | 515 | 515 |
| MPV17     | -0.17336 | 7.66E-05 | 0.000336 | 515 | 515 |
| MRPL48    | -0.17332 | 7.70E-05 | 0.000337 | 515 | 515 |
| HNRNPA2B1 | -0.17317 | 7.81E-05 | 0.000342 | 515 | 515 |
| MAGED2    | -0.17315 | 7.83E-05 | 0.000343 | 515 | 515 |
| KIAA0649  | -0.17314 | 7.83E-05 | 0.000343 | 515 | 515 |
| GKAP1     | -0.17312 | 7.85E-05 | 0.000343 | 515 | 515 |
| DLEU1     | -0.17308 | 7.87E-05 | 0.000344 | 515 | 515 |
| SOX13     | -0.17305 | 7.90E-05 | 0.000345 | 515 | 515 |
| IDH2      | -0.173   | 7.94E-05 | 0.000347 | 515 | 515 |
| TSR1      | -0.17292 | 8.00E-05 | 0.00035  | 515 | 515 |
| RUNDC1    | -0.17289 | 8.02E-05 | 0.00035  | 515 | 515 |
| FAM83E    | -0.17286 | 8.05E-05 | 0.000351 | 515 | 515 |
| FLAD1     | -0.17278 | 8.11E-05 | 0.000354 | 515 | 515 |
| C1orf69   | -0.17277 | 8.11E-05 | 0.000354 | 515 | 515 |
| ARTN      | -0.17268 | 8.19E-05 | 0.000357 | 515 | 512 |
| MED24     | -0.1726  | 8.25E-05 | 0.000359 | 515 | 515 |
| NVL       | -0.17245 | 8.37E-05 | 0.000364 | 515 | 515 |
| BAIAP2L1  | -0.17234 | 8.46E-05 | 0.000368 | 515 | 515 |
| ALKBH4    | -0.1723  | 8.49E-05 | 0.000369 | 515 | 515 |
| WASL      | -0.17222 | 8.56E-05 | 0.000372 | 515 | 515 |
| RAC3      | -0.17215 | 8.62E-05 | 0.000374 | 515 | 515 |
| ABHD14A   | -0.17208 | 8.68E-05 | 0.000377 | 515 | 515 |
| SKIV2L    | -0.172   | 8.74E-05 | 0.000379 | 515 | 515 |

|           |          |          |          |     |     |
|-----------|----------|----------|----------|-----|-----|
| THEM5     | -0.17199 | 8.75E-05 | 0.00038  | 515 | 505 |
| PAICS     | -0.17193 | 8.81E-05 | 0.000382 | 515 | 515 |
| VPS37A    | -0.17182 | 8.89E-05 | 0.000385 | 515 | 515 |
| RNFT2     | -0.17181 | 8.91E-05 | 0.000386 | 515 | 515 |
| FKBP4     | -0.17178 | 8.93E-05 | 0.000386 | 515 | 515 |
| PPAPDC1B  | -0.17178 | 8.93E-05 | 0.000386 | 515 | 515 |
| BPIL3     | -0.17165 | 9.04E-05 | 0.000391 | 515 | 61  |
| RANGRF    | -0.17157 | 9.11E-05 | 0.000394 | 515 | 515 |
| TBL3      | -0.1713  | 9.35E-05 | 0.000403 | 515 | 515 |
| TRPV1     | -0.17122 | 9.42E-05 | 0.000406 | 515 | 515 |
| SYNE2     | -0.17115 | 9.48E-05 | 0.000408 | 515 | 515 |
| MANBAL    | -0.17111 | 9.53E-05 | 0.00041  | 515 | 515 |
| CHD6      | -0.17109 | 9.54E-05 | 0.00041  | 515 | 515 |
| RING1     | -0.1709  | 9.71E-05 | 0.000417 | 515 | 515 |
| TMEM115   | -0.17084 | 9.77E-05 | 0.000419 | 515 | 515 |
| TBRG4     | -0.17081 | 9.80E-05 | 0.000421 | 515 | 515 |
| MIDN      | -0.17077 | 9.84E-05 | 0.000422 | 515 | 515 |
| MAPK8IP1  | -0.17071 | 9.89E-05 | 0.000424 | 515 | 515 |
| CNGB3     | -0.17063 | 9.97E-05 | 0.000427 | 515 | 300 |
| SERHL2    | -0.17061 | 9.98E-05 | 0.000428 | 515 | 515 |
| LOC646762 | -0.17061 | 9.99E-05 | 0.000428 | 515 | 515 |
| ARID1A    | -0.17052 | 0.000101 | 0.000431 | 515 | 515 |
| C20orf4   | -0.17047 | 0.000101 | 0.000433 | 515 | 515 |
| CHCHD8    | -0.1703  | 0.000103 | 0.00044  | 515 | 515 |
| CHPF      | -0.17018 | 0.000104 | 0.000445 | 515 | 515 |
| PITX2     | -0.17011 | 0.000105 | 0.000448 | 515 | 481 |
| SH3BP4    | -0.1701  | 0.000105 | 0.000448 | 515 | 515 |
| ZSCAN29   | -0.17005 | 0.000105 | 0.00045  | 515 | 515 |
| STK19     | -0.17002 | 0.000106 | 0.000451 | 515 | 515 |
| HMBS      | -0.1699  | 0.000107 | 0.000456 | 515 | 515 |
| SYAP1     | -0.1699  | 0.000107 | 0.000456 | 515 | 515 |
| C2CD3     | -0.16977 | 0.000108 | 0.000462 | 515 | 515 |
| KIAA0562  | -0.1697  | 0.000109 | 0.000464 | 515 | 515 |
| PPARGC1A  | -0.16969 | 0.000109 | 0.000465 | 515 | 514 |
| DEDD      | -0.16964 | 0.00011  | 0.000466 | 515 | 515 |
| CYB5D1    | -0.16958 | 0.00011  | 0.000469 | 515 | 515 |
| TM9SF3    | -0.16957 | 0.00011  | 0.000469 | 515 | 515 |
| CHERP     | -0.16956 | 0.00011  | 0.00047  | 515 | 515 |
| LOC148413 | -0.16953 | 0.000111 | 0.00047  | 515 | 515 |
| CCDC64B   | -0.16944 | 0.000112 | 0.000474 | 515 | 514 |
| CLK2P     | -0.16942 | 0.000112 | 0.000475 | 515 | 515 |
| SP9       | -0.16942 | 0.000112 | 0.000475 | 515 | 130 |
| KPTN      | -0.16941 | 0.000112 | 0.000475 | 515 | 515 |
| C17orf85  | -0.16938 | 0.000112 | 0.000477 | 515 | 515 |
| ACIN1     | -0.16936 | 0.000113 | 0.000477 | 515 | 515 |
| GANAB     | -0.16935 | 0.000113 | 0.000477 | 515 | 515 |
| TMEM59L   | -0.16923 | 0.000114 | 0.000482 | 515 | 515 |
| TSPAN13   | -0.16918 | 0.000114 | 0.000485 | 515 | 515 |
| ARIH1     | -0.16914 | 0.000115 | 0.000486 | 515 | 515 |
| LOC399744 | -0.16901 | 0.000116 | 0.000492 | 515 | 515 |
| NRG4      | -0.16896 | 0.000117 | 0.000493 | 515 | 479 |
| FZD8      | -0.16891 | 0.000117 | 0.000496 | 515 | 515 |
| OLIG3     | -0.16884 | 0.000118 | 0.000499 | 515 | 73  |
| UBA1      | -0.16883 | 0.000118 | 0.000499 | 515 | 515 |

|          |          |          |          |     |     |
|----------|----------|----------|----------|-----|-----|
| FA2H     | -0.16881 | 0.000118 | 0.0005   | 515 | 515 |
| GNL3     | -0.16873 | 0.000119 | 0.000503 | 515 | 515 |
| BOLL     | -0.16871 | 0.00012  | 0.000504 | 515 | 235 |
| C2orf79  | -0.16869 | 0.00012  | 0.000504 | 515 | 515 |
| WDR6     | -0.16859 | 0.000121 | 0.000509 | 515 | 515 |
| ACOX1    | -0.16855 | 0.000121 | 0.000511 | 515 | 515 |
| TOMM6    | -0.16854 | 0.000121 | 0.000511 | 515 | 515 |
| KAAG1    | -0.16853 | 0.000122 | 0.000511 | 515 | 351 |
| BOP1     | -0.16851 | 0.000122 | 0.000512 | 515 | 514 |
| MAEA     | -0.16848 | 0.000122 | 0.000513 | 515 | 515 |
| CNST     | -0.16848 | 0.000122 | 0.000513 | 515 | 515 |
| NUP88    | -0.16847 | 0.000122 | 0.000513 | 515 | 515 |
| ZNF579   | -0.16847 | 0.000122 | 0.000513 | 515 | 515 |
| TET1     | -0.16837 | 0.000124 | 0.000518 | 515 | 515 |
| SEC24C   | -0.16837 | 0.000124 | 0.000518 | 515 | 515 |
| STK35    | -0.16832 | 0.000124 | 0.00052  | 515 | 515 |
| WBP1     | -0.16829 | 0.000124 | 0.000521 | 515 | 515 |
| SLC26A1  | -0.16829 | 0.000124 | 0.000521 | 515 | 515 |
| SPATA2   | -0.16824 | 0.000125 | 0.000523 | 515 | 515 |
| PES1     | -0.1682  | 0.000125 | 0.000525 | 515 | 515 |
| NT5DC3   | -0.16814 | 0.000126 | 0.000528 | 515 | 515 |
| PRRT4    | -0.16813 | 0.000126 | 0.000528 | 515 | 469 |
| UBE2G1   | -0.16809 | 0.000127 | 0.00053  | 515 | 515 |
| AKR7A2   | -0.16806 | 0.000127 | 0.000531 | 515 | 515 |
| PDE8A    | -0.16797 | 0.000128 | 0.000535 | 515 | 515 |
| PSMB5    | -0.16796 | 0.000128 | 0.000536 | 515 | 515 |
| TTC17    | -0.16793 | 0.000129 | 0.000537 | 515 | 515 |
| NFRKB    | -0.16792 | 0.000129 | 0.000538 | 515 | 515 |
| TRIM39   | -0.16792 | 0.000129 | 0.000538 | 515 | 515 |
| ZNF598   | -0.16775 | 0.000131 | 0.000546 | 515 | 515 |
| GABRQ    | -0.16774 | 0.000131 | 0.000546 | 515 | 220 |
| KDEL2    | -0.16774 | 0.000131 | 0.000546 | 515 | 515 |
| PUF60    | -0.16773 | 0.000131 | 0.000546 | 515 | 515 |
| MAPK7    | -0.16773 | 0.000131 | 0.000546 | 515 | 515 |
| COPG2    | -0.16771 | 0.000131 | 0.000547 | 515 | 515 |
| GALR3    | -0.16767 | 0.000132 | 0.000549 | 515 | 151 |
| HAPLN2   | -0.16767 | 0.000132 | 0.000549 | 515 | 327 |
| CORO1B   | -0.16766 | 0.000132 | 0.000549 | 515 | 515 |
| XRCC6    | -0.16765 | 0.000132 | 0.000549 | 515 | 515 |
| FGFRL1   | -0.16762 | 0.000132 | 0.00055  | 515 | 515 |
| NLE1     | -0.16762 | 0.000132 | 0.00055  | 515 | 515 |
| MBD6     | -0.1676  | 0.000133 | 0.000552 | 515 | 515 |
| HCG18    | -0.16757 | 0.000133 | 0.000553 | 515 | 515 |
| CLPB     | -0.16754 | 0.000133 | 0.000554 | 515 | 515 |
| STRN4    | -0.16751 | 0.000134 | 0.000555 | 515 | 515 |
| EPS8L2   | -0.16738 | 0.000136 | 0.000562 | 515 | 515 |
| FAM195A  | -0.16732 | 0.000136 | 0.000565 | 515 | 515 |
| OCA2     | -0.16731 | 0.000136 | 0.000565 | 515 | 454 |
| DECR2    | -0.16731 | 0.000136 | 0.000565 | 515 | 515 |
| ZNRF3    | -0.1673  | 0.000137 | 0.000566 | 515 | 515 |
| KCTD3    | -0.16723 | 0.000137 | 0.000569 | 515 | 515 |
| RHOBTB1  | -0.16719 | 0.000138 | 0.00057  | 515 | 515 |
| TMEM183A | -0.16718 | 0.000138 | 0.000571 | 515 | 515 |
| ZNF628   | -0.16713 | 0.000139 | 0.000573 | 515 | 515 |



|           |          |          |          |     |     |
|-----------|----------|----------|----------|-----|-----|
| SLC28A2   | -0.16709 | 0.000139 | 0.000575 | 515 | 271 |
| CSRP2BP   | -0.16704 | 0.00014  | 0.000578 | 515 | 515 |
| SDHC      | -0.16701 | 0.00014  | 0.000579 | 515 | 515 |
| ZNF710    | -0.16697 | 0.000141 | 0.000581 | 515 | 515 |
| GORASP2   | -0.16694 | 0.000141 | 0.000582 | 515 | 515 |
| BCL7A     | -0.16679 | 0.000143 | 0.00059  | 515 | 515 |
| RNPS1     | -0.16655 | 0.000146 | 0.000603 | 515 | 515 |
| SRC       | -0.16649 | 0.000147 | 0.000606 | 515 | 515 |
| PTPN23    | -0.16646 | 0.000148 | 0.000607 | 515 | 515 |
| PRR5-ARHG | -0.16646 | 0.000148 | 0.000607 | 515 | 511 |
| HCN3      | -0.16645 | 0.000148 | 0.000607 | 515 | 515 |
| KIF3B     | -0.16645 | 0.000148 | 0.000607 | 515 | 515 |
| FRAT1     | -0.16634 | 0.000149 | 0.000613 | 515 | 515 |
| LOC29034  | -0.16632 | 0.00015  | 0.000614 | 515 | 91  |
| DLAT      | -0.16629 | 0.00015  | 0.000615 | 515 | 515 |
| UFC1      | -0.16629 | 0.00015  | 0.000615 | 515 | 515 |
| LRBA      | -0.16624 | 0.000151 | 0.000618 | 515 | 515 |
| ZNF213    | -0.1662  | 0.000151 | 0.00062  | 515 | 515 |
| HS1BP3    | -0.16613 | 0.000152 | 0.000624 | 515 | 515 |
| IFT81     | -0.16605 | 0.000153 | 0.000627 | 515 | 515 |
| SPACA4    | -0.16604 | 0.000154 | 0.000628 | 515 | 507 |
| TUG1      | -0.16596 | 0.000155 | 0.000633 | 515 | 515 |
| BCKDHB    | -0.16595 | 0.000155 | 0.000633 | 515 | 515 |
| C1orf53   | -0.16594 | 0.000155 | 0.000633 | 515 | 515 |
| C22orf29  | -0.16589 | 0.000156 | 0.000636 | 515 | 515 |
| SLC5A12   | -0.1658  | 0.000157 | 0.000641 | 515 | 446 |
| LDHD      | -0.16571 | 0.000158 | 0.000645 | 515 | 515 |
| RNF5      | -0.16566 | 0.000159 | 0.000648 | 515 | 515 |
| FARP1     | -0.16565 | 0.000159 | 0.000648 | 515 | 515 |
| TNKS1BP1  | -0.16565 | 0.000159 | 0.000648 | 515 | 515 |
| ALDH6A1   | -0.16564 | 0.000159 | 0.000649 | 515 | 515 |
| NUP133    | -0.16559 | 0.00016  | 0.000652 | 515 | 515 |
| PDS5A     | -0.16556 | 0.000161 | 0.000653 | 515 | 515 |
| DNAL4     | -0.16556 | 0.000161 | 0.000653 | 515 | 515 |
| ALG12     | -0.16548 | 0.000162 | 0.000657 | 515 | 515 |
| CHD3      | -0.16533 | 0.000164 | 0.000666 | 515 | 515 |
| ATP6V1B1  | -0.16533 | 0.000164 | 0.000666 | 515 | 515 |
| FAM41C    | -0.1653  | 0.000165 | 0.000668 | 515 | 515 |
| EIF1AD    | -0.16528 | 0.000165 | 0.000669 | 515 | 515 |
| ERBB2     | -0.16525 | 0.000165 | 0.00067  | 515 | 515 |
| ANP32C    | -0.16509 | 0.000168 | 0.00068  | 515 | 484 |
| SMYD3     | -0.16505 | 0.000168 | 0.000682 | 515 | 515 |
| ID4       | -0.16497 | 0.00017  | 0.000686 | 515 | 515 |
| TFCP2L1   | -0.16493 | 0.00017  | 0.000688 | 515 | 515 |
| PHGR1     | -0.16492 | 0.00017  | 0.000689 | 515 | 192 |
| MRPS5     | -0.16484 | 0.000172 | 0.000694 | 515 | 515 |
| TXNL4A    | -0.16482 | 0.000172 | 0.000695 | 515 | 515 |
| CDC42BPG  | -0.1648  | 0.000172 | 0.000695 | 515 | 515 |
| DCAF12L2  | -0.1648  | 0.000172 | 0.000695 | 515 | 347 |
| SLC37A4   | -0.16475 | 0.000173 | 0.000699 | 515 | 515 |
| TARDBP    | -0.16474 | 0.000173 | 0.000699 | 515 | 515 |
| BAT1      | -0.16469 | 0.000174 | 0.000702 | 515 | 515 |
| NPAS1     | -0.16463 | 0.000175 | 0.000706 | 515 | 511 |
| ZNF16     | -0.16459 | 0.000176 | 0.000708 | 515 | 515 |

|          |          |          |          |     |     |
|----------|----------|----------|----------|-----|-----|
| KIF1B    | -0.16457 | 0.000176 | 0.000709 | 515 | 515 |
| TAF6L    | -0.16448 | 0.000177 | 0.000714 | 515 | 515 |
| GIGYF2   | -0.16445 | 0.000178 | 0.000716 | 515 | 515 |
| CHRAC1   | -0.16439 | 0.000179 | 0.00072  | 515 | 515 |
| MAF1     | -0.16437 | 0.000179 | 0.000721 | 515 | 515 |
| SURF6    | -0.16427 | 0.000181 | 0.000727 | 515 | 515 |
| ATAD3C   | -0.16427 | 0.000181 | 0.000727 | 515 | 515 |
| WDR45L   | -0.16425 | 0.000181 | 0.000728 | 515 | 515 |
| DNAJC21  | -0.16421 | 0.000182 | 0.00073  | 515 | 515 |
| POMT1    | -0.16419 | 0.000182 | 0.000731 | 515 | 515 |
| SLC7A2   | -0.16419 | 0.000182 | 0.000731 | 515 | 515 |
| NOP14    | -0.16417 | 0.000183 | 0.000733 | 515 | 515 |
| IER3IP1  | -0.16413 | 0.000183 | 0.000735 | 515 | 515 |
| PNPLA2   | -0.16403 | 0.000185 | 0.000742 | 515 | 515 |
| SMUG1    | -0.16402 | 0.000185 | 0.000742 | 515 | 515 |
| ZNF384   | -0.164   | 0.000185 | 0.000743 | 515 | 515 |
| CKAP4    | -0.16391 | 0.000187 | 0.000749 | 515 | 515 |
| OMP      | -0.16385 | 0.000188 | 0.000753 | 515 | 309 |
| MBLAC1   | -0.16378 | 0.000189 | 0.000757 | 515 | 515 |
| MRPS21   | -0.16376 | 0.00019  | 0.000758 | 515 | 515 |
| ATP6VOA4 | -0.16376 | 0.00019  | 0.000758 | 515 | 508 |
| C22orf36 | -0.16376 | 0.00019  | 0.000758 | 515 | 515 |
| SLC30A10 | -0.16373 | 0.00019  | 0.00076  | 515 | 202 |
| RRS1     | -0.16372 | 0.00019  | 0.00076  | 515 | 515 |
| C9orf86  | -0.16358 | 0.000193 | 0.000769 | 515 | 515 |
| C19orf73 | -0.1635  | 0.000194 | 0.000774 | 515 | 515 |
| PPP2R2D  | -0.16349 | 0.000194 | 0.000775 | 515 | 515 |
| DYRK1B   | -0.16345 | 0.000195 | 0.000778 | 515 | 515 |
| DHX16    | -0.16332 | 0.000197 | 0.000787 | 515 | 515 |
| CRLF1    | -0.1632  | 0.0002   | 0.000795 | 515 | 515 |
| ZBTB9    | -0.16311 | 0.000201 | 0.000801 | 515 | 515 |
| MRPS17   | -0.16302 | 0.000203 | 0.000807 | 515 | 515 |
| PLS1     | -0.16293 | 0.000205 | 0.000813 | 515 | 515 |
| UBE2O    | -0.16283 | 0.000206 | 0.00082  | 515 | 515 |
| CAMKK1   | -0.16277 | 0.000208 | 0.000824 | 515 | 515 |
| ATP2C2   | -0.16276 | 0.000208 | 0.000824 | 515 | 515 |
| KIF13B   | -0.16265 | 0.00021  | 0.000832 | 515 | 515 |
| TMEM141  | -0.16252 | 0.000212 | 0.000842 | 515 | 515 |
| C18orf22 | -0.16251 | 0.000213 | 0.000842 | 515 | 515 |
| OAZ2     | -0.1625  | 0.000213 | 0.000843 | 515 | 515 |
| GOLPH3L  | -0.16248 | 0.000213 | 0.000844 | 515 | 515 |
| DSTN     | -0.16246 | 0.000213 | 0.000845 | 515 | 515 |
| ARCN1    | -0.16244 | 0.000214 | 0.000847 | 515 | 515 |
| LSM4     | -0.16243 | 0.000214 | 0.000847 | 515 | 515 |
| PSMG3    | -0.16241 | 0.000214 | 0.000848 | 515 | 515 |
| C12orf56 | -0.16231 | 0.000216 | 0.000855 | 515 | 354 |
| CLN6     | -0.16231 | 0.000216 | 0.000855 | 515 | 515 |
| NRSN2    | -0.16225 | 0.000218 | 0.00086  | 515 | 515 |
| SAMD10   | -0.16214 | 0.00022  | 0.000868 | 515 | 515 |
| RFNG     | -0.1621  | 0.000221 | 0.000871 | 515 | 515 |
| PPRC1    | -0.16208 | 0.000221 | 0.000872 | 515 | 515 |
| F2       | -0.16208 | 0.000221 | 0.000872 | 515 | 254 |
| PRMT8    | -0.16197 | 0.000223 | 0.00088  | 515 | 444 |
| RTF1     | -0.16193 | 0.000224 | 0.000883 | 515 | 515 |

|           |          |          |          |     |     |
|-----------|----------|----------|----------|-----|-----|
| ADI1      | -0.16187 | 0.000225 | 0.000888 | 515 | 515 |
| GPN2      | -0.16184 | 0.000226 | 0.00089  | 515 | 515 |
| COMMD4    | -0.16179 | 0.000227 | 0.000893 | 515 | 515 |
| PLA2G10   | -0.16172 | 0.000228 | 0.000898 | 515 | 511 |
| HMGCS1    | -0.16172 | 0.000228 | 0.000899 | 515 | 515 |
| PHF23     | -0.16167 | 0.000229 | 0.000902 | 515 | 515 |
| TIMM13    | -0.16166 | 0.00023  | 0.000903 | 515 | 515 |
| DPM2      | -0.16166 | 0.00023  | 0.000903 | 515 | 515 |
| ZNF428    | -0.16161 | 0.000231 | 0.000906 | 515 | 515 |
| PACS2     | -0.1616  | 0.000231 | 0.000907 | 515 | 515 |
| CABLES1   | -0.16145 | 0.000234 | 0.000919 | 515 | 515 |
| FAM108C1  | -0.16145 | 0.000234 | 0.000919 | 515 | 515 |
| HSPD1     | -0.16139 | 0.000235 | 0.000923 | 515 | 515 |
| SNRNP35   | -0.16137 | 0.000236 | 0.000925 | 515 | 515 |
| DEFB126   | -0.16129 | 0.000237 | 0.000931 | 515 | 104 |
| MARVELD2  | -0.16123 | 0.000239 | 0.000936 | 515 | 515 |
| C20orf112 | -0.16121 | 0.000239 | 0.000937 | 515 | 515 |
| LOC388796 | -0.16121 | 0.000239 | 0.000937 | 515 | 515 |
| GSR       | -0.16121 | 0.000239 | 0.000937 | 515 | 515 |
| COPZ1     | -0.16119 | 0.000239 | 0.000938 | 515 | 515 |
| POU6F2    | -0.16118 | 0.00024  | 0.000939 | 515 | 354 |
| SMARCC2   | -0.16117 | 0.00024  | 0.000939 | 515 | 515 |
| RFX6      | -0.16115 | 0.00024  | 0.000941 | 515 | 202 |
| PRSS8     | -0.16112 | 0.000241 | 0.000944 | 515 | 515 |
| PPM1G     | -0.16106 | 0.000242 | 0.000948 | 515 | 515 |
| ANOS      | -0.16105 | 0.000243 | 0.000949 | 515 | 515 |
| GATAD2B   | -0.16097 | 0.000244 | 0.000956 | 515 | 515 |
| TRAPPC1   | -0.16096 | 0.000245 | 0.000956 | 515 | 515 |
| GALNT11   | -0.16093 | 0.000245 | 0.000958 | 515 | 515 |
| BPNT1     | -0.16093 | 0.000245 | 0.000958 | 515 | 515 |
| CORT      | -0.16092 | 0.000245 | 0.000959 | 515 | 488 |
| AARS      | -0.16086 | 0.000247 | 0.000964 | 515 | 515 |
| FBXW4     | -0.16078 | 0.000249 | 0.00097  | 515 | 515 |
| LOC116437 | -0.16077 | 0.000249 | 0.000971 | 515 | 201 |
| RBM34     | -0.16074 | 0.00025  | 0.000973 | 515 | 515 |
| PAIP1     | -0.16074 | 0.00025  | 0.000973 | 515 | 515 |
| HOOK2     | -0.16071 | 0.00025  | 0.000975 | 515 | 515 |
| C10orf35  | -0.16064 | 0.000252 | 0.000981 | 515 | 515 |
| AKR1C2    | -0.16064 | 0.000252 | 0.000981 | 515 | 515 |
| AFTPH     | -0.16058 | 0.000253 | 0.000986 | 515 | 515 |
| C12orf10  | -0.16058 | 0.000253 | 0.000986 | 515 | 515 |
| CGN       | -0.16048 | 0.000255 | 0.000994 | 515 | 515 |
| TROVE2    | -0.16042 | 0.000257 | 0.000999 | 515 | 515 |
| FGL1      | -0.1601  | 0.000264 | 0.001026 | 515 | 496 |
| PVRL4     | -0.1601  | 0.000264 | 0.001026 | 515 | 515 |
| RNF8      | -0.1601  | 0.000264 | 0.001026 | 515 | 515 |
| MOGS      | -0.16008 | 0.000265 | 0.001027 | 515 | 515 |
| SHC1      | -0.16006 | 0.000265 | 0.00103  | 515 | 515 |
| AARS2     | -0.16004 | 0.000266 | 0.001031 | 515 | 515 |
| CSNK2B    | -0.16001 | 0.000267 | 0.001034 | 515 | 515 |
| TOMM20    | -0.16    | 0.000267 | 0.001034 | 515 | 515 |
| MYADML2   | -0.15992 | 0.000269 | 0.001041 | 515 | 439 |
| LOC348926 | -0.15992 | 0.000269 | 0.001041 | 515 | 515 |
| C11orf53  | -0.1599  | 0.000269 | 0.001042 | 515 | 331 |

|           |          |          |          |     |     |
|-----------|----------|----------|----------|-----|-----|
| CLK2      | -0.15986 | 0.00027  | 0.001046 | 515 | 515 |
| PDCL3     | -0.15981 | 0.000271 | 0.00105  | 515 | 515 |
| SNRPA     | -0.15975 | 0.000273 | 0.001056 | 515 | 515 |
| HPN       | -0.15973 | 0.000273 | 0.001058 | 515 | 515 |
| C1orf131  | -0.15956 | 0.000277 | 0.001073 | 515 | 515 |
| SETD5     | -0.15952 | 0.000278 | 0.001076 | 515 | 515 |
| SSRP1     | -0.15951 | 0.000279 | 0.001077 | 515 | 515 |
| CKB       | -0.15947 | 0.00028  | 0.00108  | 515 | 515 |
| AXIN1     | -0.15945 | 0.00028  | 0.001082 | 515 | 515 |
| TPD52     | -0.15942 | 0.000281 | 0.001085 | 515 | 515 |
| TMEM201   | -0.15933 | 0.000283 | 0.001093 | 515 | 515 |
| CXADR     | -0.15925 | 0.000285 | 0.001101 | 515 | 515 |
| MTFR1     | -0.15911 | 0.000289 | 0.001113 | 515 | 515 |
| TLE6      | -0.15903 | 0.000291 | 0.00112  | 515 | 515 |
| IGF2AS    | -0.1589  | 0.000294 | 0.001132 | 515 | 270 |
| TMEM184B  | -0.15886 | 0.000295 | 0.001136 | 515 | 515 |
| TTC22     | -0.15885 | 0.000296 | 0.001136 | 515 | 515 |
| HIST1H4H  | -0.15884 | 0.000296 | 0.001137 | 515 | 515 |
| SEPHS2    | -0.15883 | 0.000296 | 0.001138 | 515 | 515 |
| SSU72     | -0.15883 | 0.000296 | 0.001138 | 515 | 515 |
| FAM136A   | -0.15881 | 0.000297 | 0.001139 | 515 | 515 |
| SLC7A1    | -0.15881 | 0.000297 | 0.001139 | 515 | 515 |
| ZNF408    | -0.15874 | 0.000299 | 0.001145 | 515 | 515 |
| TRMT61A   | -0.15872 | 0.000299 | 0.001148 | 515 | 515 |
| PDF       | -0.15869 | 0.0003   | 0.001149 | 515 | 515 |
| ATXN7L3   | -0.15865 | 0.000301 | 0.001153 | 515 | 515 |
| SUV420H2  | -0.15862 | 0.000302 | 0.001156 | 515 | 515 |
| PRR12     | -0.15858 | 0.000303 | 0.00116  | 515 | 515 |
| CASZ1     | -0.15854 | 0.000304 | 0.001163 | 515 | 515 |
| CNOT3     | -0.15849 | 0.000305 | 0.001168 | 515 | 515 |
| DNAJC4    | -0.15843 | 0.000307 | 0.001175 | 515 | 515 |
| SYTL5     | -0.15842 | 0.000307 | 0.001175 | 515 | 513 |
| PARN      | -0.15835 | 0.000309 | 0.001182 | 515 | 515 |
| C1orf182  | -0.15833 | 0.00031  | 0.001184 | 515 | 504 |
| RAB17     | -0.15833 | 0.00031  | 0.001184 | 515 | 515 |
| MMAB      | -0.1583  | 0.00031  | 0.001187 | 515 | 515 |
| NT5DC2    | -0.15827 | 0.000311 | 0.001189 | 515 | 515 |
| SEC31A    | -0.15825 | 0.000312 | 0.00119  | 515 | 515 |
| GOLGA3    | -0.15822 | 0.000313 | 0.001192 | 515 | 515 |
| TLL5      | -0.15813 | 0.000315 | 0.001201 | 515 | 515 |
| GBAS      | -0.15805 | 0.000317 | 0.001209 | 515 | 515 |
| SMARCB1   | -0.15804 | 0.000318 | 0.00121  | 515 | 515 |
| FOXRED1   | -0.15798 | 0.000319 | 0.001216 | 515 | 515 |
| NCRNA0018 | -0.15795 | 0.00032  | 0.001218 | 515 | 515 |
| KDM4A     | -0.1579  | 0.000322 | 0.001224 | 515 | 515 |
| CDK11B    | -0.15783 | 0.000324 | 0.00123  | 515 | 515 |
| SLC25A17  | -0.15783 | 0.000324 | 0.00123  | 515 | 515 |
| FAM9A     | -0.1578  | 0.000324 | 0.001233 | 515 | 52  |
| PNMT      | -0.15776 | 0.000326 | 0.001236 | 515 | 481 |
| SORT1     | -0.15765 | 0.000329 | 0.001248 | 515 | 515 |
| MARVELD3  | -0.15761 | 0.00033  | 0.001252 | 515 | 515 |
| ZSWIM1    | -0.15761 | 0.00033  | 0.001252 | 515 | 515 |
| E2F6      | -0.1576  | 0.00033  | 0.001253 | 515 | 515 |
| PDAP1     | -0.15757 | 0.000331 | 0.001255 | 515 | 515 |

|           |          |          |          |     |     |
|-----------|----------|----------|----------|-----|-----|
| KIAA0406  | -0.15733 | 0.000338 | 0.001281 | 515 | 515 |
| SPATA2L   | -0.1573  | 0.000339 | 0.001284 | 515 | 515 |
| C12orf34  | -0.15729 | 0.00034  | 0.001285 | 515 | 515 |
| CNKSRI    | -0.15724 | 0.000341 | 0.00129  | 515 | 515 |
| IGSF9     | -0.1572  | 0.000342 | 0.001294 | 515 | 515 |
| SMPD4     | -0.15717 | 0.000343 | 0.001297 | 515 | 515 |
| HNRNPL    | -0.15717 | 0.000343 | 0.001297 | 515 | 515 |
| INO80B    | -0.15716 | 0.000343 | 0.001297 | 515 | 515 |
| TULP3     | -0.15707 | 0.000346 | 0.001307 | 515 | 515 |
| VAX2      | -0.15703 | 0.000347 | 0.001312 | 515 | 509 |
| SLC37A1   | -0.15703 | 0.000347 | 0.001312 | 515 | 515 |
| GCNT2     | -0.15702 | 0.000348 | 0.001312 | 515 | 515 |
| PPP1R9A   | -0.15698 | 0.000349 | 0.001316 | 515 | 515 |
| ILF2      | -0.15689 | 0.000352 | 0.001326 | 515 | 515 |
| NOLC1     | -0.15688 | 0.000352 | 0.001326 | 515 | 515 |
| NACA2     | -0.15687 | 0.000352 | 0.001328 | 515 | 515 |
| LOC148709 | -0.15683 | 0.000353 | 0.001331 | 515 | 507 |
| NUFIP1    | -0.15676 | 0.000356 | 0.001339 | 515 | 515 |
| AZI1      | -0.15673 | 0.000357 | 0.001343 | 515 | 515 |
| JRKL      | -0.15671 | 0.000357 | 0.001345 | 515 | 515 |
| AP1M2     | -0.15667 | 0.000359 | 0.001349 | 515 | 515 |
| SLC25A33  | -0.15665 | 0.000359 | 0.00135  | 515 | 515 |
| C1QBP     | -0.15663 | 0.00036  | 0.001353 | 515 | 515 |
| LOC723972 | -0.15662 | 0.00036  | 0.001354 | 515 | 515 |
| TRUB2     | -0.15647 | 0.000365 | 0.00137  | 515 | 515 |
| BAT4      | -0.15647 | 0.000365 | 0.00137  | 515 | 515 |
| FAM103A1  | -0.15638 | 0.000368 | 0.00138  | 515 | 515 |
| AGA       | -0.15634 | 0.000369 | 0.001385 | 515 | 515 |
| DGCR8     | -0.15631 | 0.00037  | 0.001388 | 515 | 515 |
| MAP1D     | -0.15626 | 0.000372 | 0.001393 | 515 | 515 |
| BTBD7     | -0.15615 | 0.000375 | 0.001406 | 515 | 515 |
| ST3GAL3   | -0.15615 | 0.000375 | 0.001406 | 515 | 515 |
| AKT1      | -0.15614 | 0.000376 | 0.001407 | 515 | 515 |
| BRAP      | -0.15613 | 0.000376 | 0.001408 | 515 | 515 |
| EPHX1     | -0.156   | 0.00038  | 0.001422 | 515 | 515 |
| ZNF3      | -0.15595 | 0.000382 | 0.001427 | 515 | 515 |
| TTC19     | -0.15594 | 0.000382 | 0.001429 | 515 | 515 |
| HPDL      | -0.15586 | 0.000385 | 0.001438 | 515 | 513 |
| HSPBP1    | -0.1558  | 0.000387 | 0.001445 | 515 | 515 |
| RPL7L1    | -0.15576 | 0.000389 | 0.00145  | 515 | 515 |
| FAAH      | -0.15571 | 0.00039  | 0.001455 | 515 | 515 |
| DCAF4L2   | -0.15569 | 0.000391 | 0.001457 | 515 | 96  |
| SMEK1     | -0.15569 | 0.000391 | 0.001458 | 515 | 515 |
| DSTYK     | -0.15564 | 0.000392 | 0.001463 | 515 | 515 |
| SRRT      | -0.15562 | 0.000393 | 0.001465 | 515 | 515 |
| RNF26     | -0.1556  | 0.000394 | 0.001466 | 515 | 515 |
| NUDC      | -0.15558 | 0.000395 | 0.001469 | 515 | 515 |
| SND1      | -0.15555 | 0.000396 | 0.001472 | 515 | 515 |
| ANKRD54   | -0.15552 | 0.000397 | 0.001475 | 515 | 515 |
| FAM165B   | -0.15537 | 0.000402 | 0.001494 | 515 | 515 |
| POMT2     | -0.15527 | 0.000406 | 0.001507 | 515 | 515 |
| PPP2R5D   | -0.15524 | 0.000406 | 0.00151  | 515 | 515 |
| GPR89A    | -0.15522 | 0.000407 | 0.001512 | 515 | 515 |
| PGAP3     | -0.15522 | 0.000407 | 0.001513 | 515 | 515 |

|           |          |          |          |     |     |
|-----------|----------|----------|----------|-----|-----|
| KIAA0319L | -0.15516 | 0.000409 | 0.00152  | 515 | 515 |
| TBC1D7    | -0.15507 | 0.000412 | 0.00153  | 515 | 515 |
| TRIM24    | -0.15501 | 0.000415 | 0.001539 | 515 | 515 |
| KLHDC9    | -0.15498 | 0.000416 | 0.001542 | 515 | 513 |
| PGRMC2    | -0.15496 | 0.000417 | 0.001545 | 515 | 515 |
| NDUFB11   | -0.15473 | 0.000425 | 0.001574 | 515 | 515 |
| IRX3      | -0.15461 | 0.000429 | 0.001589 | 515 | 515 |
| FAM128B   | -0.15459 | 0.00043  | 0.001591 | 515 | 515 |
| CBS       | -0.15454 | 0.000432 | 0.001598 | 515 | 515 |
| SERHL     | -0.15451 | 0.000433 | 0.001602 | 515 | 515 |
| SCAF1     | -0.15451 | 0.000433 | 0.001602 | 515 | 515 |
| C1orf57   | -0.1545  | 0.000434 | 0.001603 | 515 | 515 |
| ZFP41     | -0.15449 | 0.000434 | 0.001603 | 515 | 515 |
| MUC6      | -0.15445 | 0.000435 | 0.001608 | 515 | 493 |
| GFOD2     | -0.15442 | 0.000437 | 0.001613 | 515 | 515 |
| LAMC1     | -0.15438 | 0.000438 | 0.001617 | 515 | 515 |
| CTNND1    | -0.15438 | 0.000438 | 0.001617 | 515 | 515 |
| SNRPD3    | -0.15428 | 0.000442 | 0.00163  | 515 | 515 |
| EPPK1     | -0.15416 | 0.000446 | 0.001646 | 515 | 515 |
| PC        | -0.15416 | 0.000447 | 0.001646 | 515 | 515 |
| SART1     | -0.15414 | 0.000447 | 0.001649 | 515 | 515 |
| NOP2      | -0.15403 | 0.000451 | 0.001664 | 515 | 515 |
| RAG1AP1   | -0.15401 | 0.000452 | 0.001667 | 515 | 515 |
| AHCY      | -0.15395 | 0.000455 | 0.001675 | 515 | 515 |
| C11orf94  | -0.15387 | 0.000458 | 0.001686 | 515 | 65  |
| PEX14     | -0.15387 | 0.000458 | 0.001686 | 515 | 515 |
| WDR18     | -0.15362 | 0.000468 | 0.00172  | 515 | 515 |
| SPR       | -0.1536  | 0.000469 | 0.001723 | 515 | 515 |
| C12orf73  | -0.15359 | 0.000469 | 0.001725 | 515 | 515 |
| C11orf83  | -0.15358 | 0.000469 | 0.001725 | 515 | 515 |
| SAMD4B    | -0.15353 | 0.000471 | 0.001731 | 515 | 515 |
| RIMKLA    | -0.1535  | 0.000473 | 0.001735 | 515 | 515 |
| SLC5A10   | -0.15348 | 0.000474 | 0.001738 | 515 | 467 |
| LARP1B    | -0.15346 | 0.000474 | 0.001741 | 515 | 515 |
| C18orf2   | -0.15346 | 0.000475 | 0.001741 | 515 | 281 |
| OSBP2     | -0.15345 | 0.000475 | 0.001741 | 515 | 515 |
| WDR60     | -0.15344 | 0.000475 | 0.001742 | 515 | 515 |
| C1orf109  | -0.15334 | 0.000479 | 0.001757 | 515 | 515 |
| LOC145837 | -0.15325 | 0.000483 | 0.00177  | 515 | 508 |
| NAT9      | -0.15315 | 0.000487 | 0.001784 | 515 | 515 |
| KIAA1671  | -0.15307 | 0.000491 | 0.001795 | 515 | 515 |
| KIAA1958  | -0.15305 | 0.000491 | 0.001797 | 515 | 515 |
| FAM83G    | -0.15304 | 0.000492 | 0.001798 | 515 | 515 |
| IL17RC    | -0.15299 | 0.000494 | 0.001806 | 515 | 515 |
| THRAP3    | -0.15297 | 0.000495 | 0.001808 | 515 | 515 |
| HMGCS2    | -0.15292 | 0.000497 | 0.001816 | 515 | 410 |
| DEAF1     | -0.15292 | 0.000497 | 0.001816 | 515 | 515 |
| KIAA0232  | -0.15291 | 0.000497 | 0.001816 | 515 | 515 |
| DOPEY2    | -0.15289 | 0.000498 | 0.00182  | 515 | 515 |
| LOC100190 | -0.15287 | 0.000499 | 0.001823 | 515 | 228 |
| PAK6      | -0.15275 | 0.000504 | 0.00184  | 515 | 515 |
| CXorf27   | -0.15274 | 0.000505 | 0.001841 | 515 | 31  |
| ZNF638    | -0.15271 | 0.000506 | 0.001845 | 515 | 515 |
| KPNA6     | -0.15253 | 0.000514 | 0.001874 | 515 | 515 |

|           |          |          |          |     |     |
|-----------|----------|----------|----------|-----|-----|
| SOCS7     | -0.15251 | 0.000515 | 0.001876 | 515 | 515 |
| C7orf41   | -0.15233 | 0.000523 | 0.001905 | 515 | 515 |
| LRTOMT    | -0.1523  | 0.000524 | 0.001908 | 515 | 515 |
| SHPK      | -0.15226 | 0.000526 | 0.001915 | 515 | 515 |
| CRTC1     | -0.15216 | 0.000531 | 0.001931 | 515 | 515 |
| C22orf41  | -0.15209 | 0.000534 | 0.001941 | 515 | 497 |
| MEIS3P1   | -0.15204 | 0.000536 | 0.001949 | 515 | 515 |
| ZFP42     | -0.15202 | 0.000537 | 0.001951 | 515 | 325 |
| DNMBP     | -0.15197 | 0.000539 | 0.001958 | 515 | 515 |
| TM4SF5    | -0.15196 | 0.00054  | 0.00196  | 515 | 231 |
| HSD17B1   | -0.15194 | 0.00054  | 0.001961 | 515 | 515 |
| USP46     | -0.15189 | 0.000543 | 0.001969 | 515 | 515 |
| LOC100271 | -0.15185 | 0.000545 | 0.001976 | 515 | 127 |
| CTNNA1    | -0.15182 | 0.000546 | 0.00198  | 515 | 515 |
| SLC2A11   | -0.15181 | 0.000547 | 0.001981 | 515 | 515 |
| GCSH      | -0.15181 | 0.000547 | 0.001981 | 515 | 514 |
| SRXN1     | -0.15175 | 0.000549 | 0.001989 | 515 | 515 |
| SLC10A5   | -0.15172 | 0.000551 | 0.001994 | 515 | 513 |
| HDAC11    | -0.15169 | 0.000552 | 0.001999 | 515 | 515 |
| NDUFS8    | -0.15168 | 0.000553 | 0.002    | 515 | 515 |
| C5orf30   | -0.15167 | 0.000553 | 0.002001 | 515 | 515 |
| PFKFB2    | -0.15154 | 0.000559 | 0.002021 | 515 | 515 |
| MCCC1     | -0.15154 | 0.00056  | 0.002022 | 515 | 515 |
| ZNF232    | -0.15144 | 0.000564 | 0.002037 | 515 | 515 |
| DDOST     | -0.1514  | 0.000566 | 0.002043 | 515 | 515 |
| HSP90B3P  | -0.1514  | 0.000566 | 0.002043 | 515 | 513 |
| RHPN1     | -0.15135 | 0.000569 | 0.002052 | 515 | 515 |
| DRG2      | -0.15132 | 0.00057  | 0.002055 | 515 | 515 |
| IGSF8     | -0.15132 | 0.00057  | 0.002056 | 515 | 515 |
| C2orf28   | -0.15126 | 0.000573 | 0.002064 | 515 | 515 |
| MFSD6L    | -0.15123 | 0.000574 | 0.00207  | 515 | 515 |
| ESRP1     | -0.15119 | 0.000576 | 0.002075 | 515 | 515 |
| LUC7L2    | -0.15119 | 0.000577 | 0.002076 | 515 | 515 |
| TCEA1     | -0.15114 | 0.000579 | 0.002083 | 515 | 515 |
| ICMT      | -0.1511  | 0.000581 | 0.002089 | 515 | 515 |
| TIGD3     | -0.15107 | 0.000582 | 0.002094 | 515 | 515 |
| RANGAP1   | -0.15106 | 0.000583 | 0.002095 | 515 | 515 |
| CYB5D2    | -0.15104 | 0.000584 | 0.002099 | 515 | 515 |
| CDYL      | -0.15098 | 0.000587 | 0.002108 | 515 | 515 |
| COL2A1    | -0.15097 | 0.000587 | 0.00211  | 515 | 401 |
| PACSIN2   | -0.15097 | 0.000587 | 0.00211  | 515 | 515 |
| P4HTM     | -0.15097 | 0.000587 | 0.00211  | 515 | 515 |
| ZNF652    | -0.15094 | 0.000589 | 0.002115 | 515 | 515 |
| MAN2A2    | -0.15091 | 0.00059  | 0.002119 | 515 | 515 |
| UCKL1     | -0.1509  | 0.000591 | 0.002121 | 515 | 515 |
| MED25     | -0.15088 | 0.000592 | 0.002124 | 515 | 515 |
| HMGB3     | -0.15087 | 0.000592 | 0.002125 | 515 | 515 |
| MARCKSL1  | -0.15077 | 0.000597 | 0.002142 | 515 | 515 |
| C19orf21  | -0.15076 | 0.000598 | 0.002144 | 515 | 515 |
| GMCL1     | -0.15075 | 0.000598 | 0.002144 | 515 | 515 |
| GTF3C1    | -0.15074 | 0.000599 | 0.002147 | 515 | 515 |
| RAB3GAP2  | -0.15072 | 0.0006   | 0.002149 | 515 | 515 |
| MBOAT7    | -0.1507  | 0.000601 | 0.002153 | 515 | 515 |
| SNX27     | -0.15068 | 0.000602 | 0.002156 | 515 | 515 |

|           |          |          |          |     |     |
|-----------|----------|----------|----------|-----|-----|
| CTU1      | -0.15066 | 0.000603 | 0.002159 | 515 | 515 |
| NOX01     | -0.15064 | 0.000604 | 0.002161 | 515 | 515 |
| EPT1      | -0.15064 | 0.000604 | 0.002161 | 515 | 515 |
| TECR      | -0.15064 | 0.000604 | 0.002162 | 515 | 515 |
| HDDC3     | -0.15061 | 0.000606 | 0.002166 | 515 | 515 |
| RNF5P1    | -0.15059 | 0.000607 | 0.002169 | 515 | 515 |
| WDR13     | -0.15055 | 0.000609 | 0.002175 | 515 | 515 |
| PDCD11    | -0.15053 | 0.00061  | 0.002178 | 515 | 515 |
| SLC6A10P  | -0.1505  | 0.000611 | 0.002183 | 515 | 487 |
| UBIAD1    | -0.15047 | 0.000613 | 0.002188 | 515 | 515 |
| INSR      | -0.1504  | 0.000616 | 0.002199 | 515 | 515 |
| RPL22     | -0.15037 | 0.000618 | 0.002205 | 515 | 515 |
| SLC25A11  | -0.15033 | 0.00062  | 0.002212 | 515 | 515 |
| FKBP9     | -0.1503  | 0.000622 | 0.002217 | 515 | 515 |
| MLEC      | -0.15027 | 0.000623 | 0.002222 | 515 | 515 |
| IFT172    | -0.15027 | 0.000623 | 0.002222 | 515 | 515 |
| C1orf107  | -0.15026 | 0.000624 | 0.002223 | 515 | 515 |
| OSBP      | -0.15024 | 0.000624 | 0.002226 | 515 | 515 |
| KBTBD6    | -0.15014 | 0.00063  | 0.002245 | 515 | 515 |
| LOC389493 | -0.15013 | 0.000631 | 0.002246 | 515 | 378 |
| LRWD1     | -0.15004 | 0.000635 | 0.00226  | 515 | 515 |
| HNRNPA0   | -0.15003 | 0.000636 | 0.002261 | 515 | 515 |
| EPHX3     | -0.15001 | 0.000637 | 0.002265 | 515 | 515 |
| PBX2      | -0.14987 | 0.000644 | 0.00229  | 515 | 515 |
| SATL1     | -0.14986 | 0.000645 | 0.002292 | 515 | 515 |
| HOTAIR    | -0.14984 | 0.000646 | 0.002295 | 515 | 289 |
| PABPC4    | -0.14978 | 0.00065  | 0.002306 | 515 | 515 |
| RNASEN    | -0.14975 | 0.000651 | 0.002311 | 515 | 515 |
| FBX016    | -0.14974 | 0.000651 | 0.002311 | 515 | 515 |
| SAFB2     | -0.14973 | 0.000652 | 0.002312 | 515 | 515 |
| POLDIP2   | -0.14973 | 0.000652 | 0.002312 | 515 | 515 |
| GNB2      | -0.14968 | 0.000655 | 0.002321 | 515 | 515 |
| DCAF8     | -0.14962 | 0.000659 | 0.002332 | 515 | 515 |
| RASSF7    | -0.14954 | 0.000663 | 0.002345 | 515 | 515 |
| EN1       | -0.14953 | 0.000663 | 0.002346 | 515 | 260 |
| DIS3L     | -0.1495  | 0.000665 | 0.002352 | 515 | 515 |
| TMEM205   | -0.1495  | 0.000665 | 0.002352 | 515 | 515 |
| GALK2     | -0.14949 | 0.000666 | 0.002354 | 515 | 515 |
| LRPAP1    | -0.14948 | 0.000666 | 0.002356 | 515 | 515 |
| CCDC12    | -0.14935 | 0.000674 | 0.002381 | 515 | 515 |
| EDC4      | -0.14934 | 0.000674 | 0.002382 | 515 | 515 |
| ZNF358    | -0.14927 | 0.000678 | 0.002395 | 515 | 515 |
| ZBTB45    | -0.14926 | 0.000678 | 0.002396 | 515 | 515 |
| MXI1      | -0.14921 | 0.000682 | 0.002406 | 515 | 515 |
| PDE4D     | -0.1491  | 0.000688 | 0.002428 | 515 | 515 |
| CHCHD1    | -0.14907 | 0.00069  | 0.002433 | 515 | 515 |
| HCFC1     | -0.14904 | 0.000691 | 0.002438 | 515 | 515 |
| HIST1H2BE | -0.14899 | 0.000694 | 0.002447 | 515 | 515 |
| CCT8L2    | -0.14895 | 0.000697 | 0.002456 | 515 | 65  |
| FUK       | -0.14893 | 0.000698 | 0.002459 | 515 | 515 |
| TPR       | -0.14889 | 0.0007   | 0.002467 | 515 | 515 |
| PTP4A1    | -0.14889 | 0.0007   | 0.002467 | 515 | 515 |
| TMEM88B   | -0.14878 | 0.000707 | 0.002488 | 515 | 318 |
| SCO1      | -0.14877 | 0.000707 | 0.002488 | 515 | 515 |



|           |          |          |          |     |     |
|-----------|----------|----------|----------|-----|-----|
| BNIP3     | -0.14871 | 0.000711 | 0.0025   | 515 | 515 |
| ELF3      | -0.1487  | 0.000711 | 0.002502 | 515 | 515 |
| TIMM22    | -0.14869 | 0.000712 | 0.002504 | 515 | 515 |
| ZNRF1     | -0.14867 | 0.000713 | 0.002507 | 515 | 515 |
| MRPS16    | -0.14865 | 0.000715 | 0.002511 | 515 | 515 |
| BANF1     | -0.1486  | 0.000717 | 0.002518 | 515 | 515 |
| SIN3A     | -0.1486  | 0.000718 | 0.002519 | 515 | 515 |
| HSP90B1   | -0.14855 | 0.00072  | 0.002528 | 515 | 515 |
| SEPT5     | -0.14854 | 0.000721 | 0.002529 | 515 | 515 |
| PUS1      | -0.14851 | 0.000723 | 0.002535 | 515 | 515 |
| TCF20     | -0.14851 | 0.000723 | 0.002536 | 515 | 515 |
| TMEM198   | -0.14848 | 0.000725 | 0.002541 | 515 | 515 |
| IP6K2     | -0.14847 | 0.000725 | 0.002543 | 515 | 515 |
| MED12     | -0.14845 | 0.000726 | 0.002546 | 515 | 515 |
| KRT83     | -0.14838 | 0.000731 | 0.00256  | 515 | 385 |
| UBE2J2    | -0.14836 | 0.000732 | 0.002563 | 515 | 515 |
| ALDH3A1   | -0.14831 | 0.000735 | 0.002573 | 515 | 512 |
| FSCN2     | -0.14829 | 0.000736 | 0.002576 | 515 | 513 |
| ARHGEF12  | -0.14829 | 0.000736 | 0.002576 | 515 | 515 |
| F7        | -0.14827 | 0.000737 | 0.002579 | 515 | 477 |
| CAD       | -0.14827 | 0.000737 | 0.002579 | 515 | 515 |
| VPS45     | -0.14827 | 0.000738 | 0.00258  | 515 | 515 |
| SRRM5     | -0.14826 | 0.000738 | 0.002582 | 515 | 515 |
| SUMF1     | -0.14824 | 0.000739 | 0.002585 | 515 | 515 |
| RDH10     | -0.14817 | 0.000744 | 0.002599 | 515 | 515 |
| AKR1C3    | -0.14816 | 0.000744 | 0.0026   | 515 | 515 |
| BCORL1    | -0.14815 | 0.000745 | 0.002602 | 515 | 515 |
| FUS       | -0.14815 | 0.000745 | 0.002602 | 515 | 515 |
| ROBLD3    | -0.14812 | 0.000747 | 0.002607 | 515 | 515 |
| MRFAP1    | -0.14811 | 0.000747 | 0.002609 | 515 | 515 |
| USP5      | -0.14808 | 0.000749 | 0.002614 | 515 | 515 |
| RIPK4     | -0.14807 | 0.00075  | 0.002614 | 515 | 515 |
| LIMCH1    | -0.14806 | 0.00075  | 0.002616 | 515 | 515 |
| PRDM12    | -0.14806 | 0.000751 | 0.002616 | 515 | 471 |
| TMEM184A  | -0.14805 | 0.000751 | 0.002617 | 515 | 515 |
| TMEM63B   | -0.14802 | 0.000753 | 0.002622 | 515 | 515 |
| UBAP2     | -0.14801 | 0.000754 | 0.002626 | 515 | 515 |
| ABCF3     | -0.14798 | 0.000755 | 0.002631 | 515 | 515 |
| PABPN1    | -0.14798 | 0.000756 | 0.002631 | 515 | 515 |
| TMEM57    | -0.14785 | 0.000763 | 0.002654 | 515 | 515 |
| POP5      | -0.14785 | 0.000764 | 0.002654 | 515 | 515 |
| ID1       | -0.14782 | 0.000766 | 0.002661 | 515 | 515 |
| RECQL5    | -0.1478  | 0.000767 | 0.002665 | 515 | 515 |
| HYLS1     | -0.14777 | 0.000769 | 0.002669 | 515 | 515 |
| KIAA0895L | -0.14776 | 0.000769 | 0.002671 | 515 | 515 |
| SMOC1     | -0.14775 | 0.00077  | 0.002673 | 515 | 514 |
| ATPAF1    | -0.1477  | 0.000773 | 0.002682 | 515 | 515 |
| RNF123    | -0.14765 | 0.000777 | 0.002693 | 515 | 515 |
| C11orf36  | -0.14753 | 0.000785 | 0.002718 | 515 | 78  |
| PTPLAD1   | -0.1475  | 0.000787 | 0.002724 | 515 | 515 |
| ENTPD2    | -0.14747 | 0.000788 | 0.00273  | 515 | 514 |
| YTHDC1    | -0.14746 | 0.000789 | 0.00273  | 515 | 515 |
| WFIKKN1   | -0.14745 | 0.000789 | 0.002732 | 515 | 514 |
| SLC39A1   | -0.14744 | 0.00079  | 0.002733 | 515 | 515 |

|           |          |          |          |     |     |
|-----------|----------|----------|----------|-----|-----|
| HSD11B2   | -0.14744 | 0.00079  | 0.002733 | 515 | 515 |
| ZGPAT     | -0.14738 | 0.000795 | 0.002747 | 515 | 515 |
| ZKSCAN3   | -0.14722 | 0.000805 | 0.002779 | 515 | 515 |
| SCAMP4    | -0.14722 | 0.000805 | 0.00278  | 515 | 515 |
| ADSS      | -0.14716 | 0.000809 | 0.002793 | 515 | 515 |
| TARBP2    | -0.14715 | 0.00081  | 0.002795 | 515 | 515 |
| HDAC8     | -0.14714 | 0.00081  | 0.002796 | 515 | 515 |
| HSF2BP    | -0.14713 | 0.000811 | 0.002797 | 515 | 515 |
| TBC1D8    | -0.14712 | 0.000811 | 0.002798 | 515 | 515 |
| LCMT2     | -0.1471  | 0.000813 | 0.002804 | 515 | 515 |
| NOXA1     | -0.14708 | 0.000814 | 0.002806 | 515 | 515 |
| SLC9A3R2  | -0.14705 | 0.000816 | 0.002812 | 515 | 515 |
| ZNF33B    | -0.14696 | 0.000823 | 0.002831 | 515 | 515 |
| EPB41L5   | -0.14679 | 0.000834 | 0.002869 | 515 | 515 |
| HSP90AB2F | -0.14677 | 0.000835 | 0.002872 | 515 | 515 |
| SLC25A6   | -0.14675 | 0.000837 | 0.002878 | 515 | 515 |
| STRA13    | -0.14675 | 0.000837 | 0.002878 | 515 | 515 |
| CCNO      | -0.14671 | 0.000839 | 0.002884 | 515 | 513 |
| USP19     | -0.14669 | 0.000841 | 0.002888 | 515 | 515 |
| HSPA9     | -0.14657 | 0.00085  | 0.002914 | 515 | 515 |
| CSTF1     | -0.14655 | 0.000851 | 0.002917 | 515 | 515 |
| SNHG9     | -0.14654 | 0.000852 | 0.002921 | 515 | 514 |
| PAIP2B    | -0.14652 | 0.000853 | 0.002924 | 515 | 515 |
| BBS1      | -0.14644 | 0.000859 | 0.002941 | 515 | 515 |
| GPHN      | -0.14643 | 0.000859 | 0.002943 | 515 | 515 |
| FAM8A1    | -0.14642 | 0.00086  | 0.002945 | 515 | 515 |
| C10orf47  | -0.14637 | 0.000864 | 0.002957 | 515 | 515 |
| NQO1      | -0.14636 | 0.000865 | 0.002959 | 515 | 515 |
| TMEM97    | -0.14634 | 0.000865 | 0.002962 | 515 | 515 |
| PDCD6     | -0.14633 | 0.000866 | 0.002964 | 515 | 515 |
| ZNF236    | -0.14626 | 0.000872 | 0.002979 | 515 | 515 |
| ATPAF2    | -0.14618 | 0.000877 | 0.002996 | 515 | 515 |
| ZNF512B   | -0.14617 | 0.000878 | 0.002997 | 515 | 515 |
| SYVN1     | -0.14617 | 0.000878 | 0.002997 | 515 | 515 |
| SDF4      | -0.14615 | 0.000879 | 0.003001 | 515 | 515 |
| FLJ46111  | -0.14614 | 0.00088  | 0.003003 | 515 | 501 |
| CKMT1B    | -0.14608 | 0.000884 | 0.003017 | 515 | 513 |
| SUPV3L1   | -0.14608 | 0.000885 | 0.003017 | 515 | 515 |
| HES5      | -0.14607 | 0.000885 | 0.00302  | 515 | 412 |
| WARS2     | -0.14604 | 0.000888 | 0.003027 | 515 | 515 |
| CDK2AP1   | -0.14598 | 0.000892 | 0.00304  | 515 | 515 |
| BMS1      | -0.14596 | 0.000893 | 0.003042 | 515 | 515 |
| PSMB6     | -0.14594 | 0.000895 | 0.003048 | 515 | 515 |
| SIM2      | -0.14593 | 0.000896 | 0.00305  | 515 | 515 |
| GPX2      | -0.14592 | 0.000897 | 0.00305  | 515 | 515 |
| CAPN9     | -0.14581 | 0.000905 | 0.003076 | 515 | 509 |
| C7orf55   | -0.14578 | 0.000907 | 0.003083 | 515 | 515 |
| SPG7      | -0.14576 | 0.000908 | 0.003086 | 515 | 515 |
| CFHR4     | -0.14576 | 0.000908 | 0.003087 | 515 | 124 |
| BRD1      | -0.14572 | 0.000911 | 0.003095 | 515 | 515 |
| SEMA3F    | -0.14571 | 0.000912 | 0.003097 | 515 | 515 |
| POLR2J    | -0.14569 | 0.000914 | 0.003103 | 515 | 515 |
| KRT8      | -0.14567 | 0.000915 | 0.003107 | 515 | 515 |
| TMEM181   | -0.14565 | 0.000917 | 0.003112 | 515 | 515 |

|           |          |          |          |     |     |
|-----------|----------|----------|----------|-----|-----|
| B4GALNT4  | -0.14564 | 0.000917 | 0.003112 | 515 | 512 |
| TCP10L    | -0.14564 | 0.000917 | 0.003113 | 515 | 511 |
| ARHGEF10  | -0.14563 | 0.000918 | 0.003114 | 515 | 515 |
| NHP2L1    | -0.14562 | 0.000919 | 0.003116 | 515 | 515 |
| POFUT1    | -0.14562 | 0.000919 | 0.003116 | 515 | 515 |
| PHOX2A    | -0.14562 | 0.000919 | 0.003116 | 515 | 139 |
| LOC154822 | -0.14558 | 0.000922 | 0.003126 | 515 | 504 |
| KLHL26    | -0.14555 | 0.000924 | 0.003131 | 515 | 515 |
| TUBG1     | -0.14552 | 0.000927 | 0.003139 | 515 | 515 |
| IGHMBP2   | -0.14547 | 0.00093  | 0.003149 | 515 | 515 |
| CSE1L     | -0.14543 | 0.000933 | 0.00316  | 515 | 515 |
| HIC2      | -0.14543 | 0.000933 | 0.00316  | 515 | 515 |
| UGGT1     | -0.14542 | 0.000934 | 0.003161 | 515 | 515 |
| ATP6V1E2  | -0.14539 | 0.000936 | 0.003167 | 515 | 515 |
| FAM128A   | -0.14531 | 0.000942 | 0.003186 | 515 | 515 |
| LOC100130 | -0.14522 | 0.000949 | 0.003209 | 515 | 513 |
| PLAGL2    | -0.14519 | 0.000952 | 0.003216 | 515 | 515 |
| ANKS6     | -0.14519 | 0.000952 | 0.003216 | 515 | 515 |
| TSSK6     | -0.14516 | 0.000954 | 0.003221 | 515 | 515 |
| MRP63     | -0.14508 | 0.000961 | 0.003243 | 515 | 515 |
| ABCC10    | -0.14507 | 0.000962 | 0.003245 | 515 | 515 |
| MFSD6     | -0.14506 | 0.000962 | 0.003246 | 515 | 515 |
| GSTA4     | -0.14504 | 0.000964 | 0.003251 | 515 | 515 |
| GNL1      | -0.14503 | 0.000965 | 0.003254 | 515 | 515 |
| REPIN1    | -0.14487 | 0.000977 | 0.003296 | 515 | 515 |
| LOC100128 | -0.14486 | 0.000978 | 0.003297 | 515 | 515 |
| UQCRC1    | -0.14484 | 0.00098  | 0.003302 | 515 | 515 |
| SLC38A8   | -0.14482 | 0.000981 | 0.003304 | 515 | 232 |
| C1orf43   | -0.1448  | 0.000982 | 0.003309 | 515 | 515 |
| DEXI      | -0.14477 | 0.000985 | 0.003318 | 515 | 515 |
| ZNF605    | -0.14471 | 0.00099  | 0.003332 | 515 | 515 |
| CAPN10    | -0.1447  | 0.000991 | 0.003336 | 515 | 515 |
| LOC100131 | -0.14469 | 0.000992 | 0.003338 | 515 | 427 |
| ZNF821    | -0.14465 | 0.000995 | 0.003348 | 515 | 515 |
| GMPPA     | -0.14459 | 0.001    | 0.003362 | 515 | 515 |
| HIRIP3    | -0.14449 | 0.001008 | 0.00339  | 515 | 515 |
| BCCIP     | -0.14447 | 0.00101  | 0.003393 | 515 | 515 |
| SNHG11    | -0.14446 | 0.001011 | 0.003396 | 515 | 515 |
| PRR3      | -0.14444 | 0.001012 | 0.003401 | 515 | 515 |
| TTC3      | -0.14437 | 0.001018 | 0.003419 | 515 | 515 |
| NR2E3     | -0.14435 | 0.00102  | 0.003424 | 515 | 469 |
| WNT8B     | -0.14433 | 0.001022 | 0.003429 | 515 | 448 |
| NIT1      | -0.14428 | 0.001025 | 0.003439 | 515 | 515 |
| EPHB3     | -0.14427 | 0.001026 | 0.003442 | 515 | 515 |
| HTR3B     | -0.14427 | 0.001026 | 0.003442 | 515 | 141 |
| RXRβ      | -0.14424 | 0.001029 | 0.003448 | 515 | 515 |
| TCF7L2    | -0.14421 | 0.001031 | 0.003455 | 515 | 515 |
| B4GALT3   | -0.14418 | 0.001034 | 0.003465 | 515 | 515 |
| FGF12     | -0.14415 | 0.001036 | 0.003471 | 515 | 513 |
| THAP7     | -0.14402 | 0.001047 | 0.003504 | 515 | 515 |
| EIF3A     | -0.14397 | 0.001052 | 0.003518 | 515 | 515 |
| ACBD3     | -0.14387 | 0.00106  | 0.003545 | 515 | 515 |
| NUCKS1    | -0.14386 | 0.001061 | 0.003546 | 515 | 515 |
| SEC23B    | -0.14383 | 0.001063 | 0.003553 | 515 | 515 |

|          |          |          |          |     |     |
|----------|----------|----------|----------|-----|-----|
| HNRNPUL2 | -0.14381 | 0.001066 | 0.00356  | 515 | 515 |
| DPY30    | -0.1438  | 0.001066 | 0.003562 | 515 | 515 |
| C21orf84 | -0.14377 | 0.001069 | 0.003568 | 515 | 339 |
| RASD1    | -0.14375 | 0.00107  | 0.003574 | 515 | 515 |
| KCNG4    | -0.1437  | 0.001075 | 0.003587 | 515 | 53  |
| PKP4     | -0.14367 | 0.001078 | 0.003597 | 515 | 515 |
| HIST1H1C | -0.14357 | 0.001086 | 0.003624 | 515 | 515 |
| PBXIP1   | -0.14354 | 0.001089 | 0.003631 | 515 | 515 |
| ATP13A1  | -0.14352 | 0.001091 | 0.003636 | 515 | 515 |
| SIX2     | -0.14351 | 0.001092 | 0.003639 | 515 | 509 |
| ARFGAP1  | -0.14346 | 0.001096 | 0.003652 | 515 | 515 |
| HECTD1   | -0.14346 | 0.001096 | 0.003652 | 515 | 515 |
| C7orf11  | -0.14345 | 0.001097 | 0.003652 | 515 | 515 |
| C9orf169 | -0.14345 | 0.001097 | 0.003652 | 515 | 503 |
| GABRG3   | -0.14344 | 0.001098 | 0.003655 | 515 | 196 |
| AP4M1    | -0.14344 | 0.001098 | 0.003655 | 515 | 515 |
| GAS5     | -0.14339 | 0.001102 | 0.003668 | 515 | 515 |
| SDR39U1  | -0.14338 | 0.001103 | 0.003671 | 515 | 515 |
| MCM3APAS | -0.14338 | 0.001104 | 0.003672 | 515 | 515 |
| ZNF764   | -0.14334 | 0.001107 | 0.003681 | 515 | 515 |
| ABCC11   | -0.1432  | 0.001119 | 0.003721 | 515 | 457 |
| NAT10    | -0.14319 | 0.00112  | 0.003723 | 515 | 515 |
| TP53BP1  | -0.14316 | 0.001123 | 0.00373  | 515 | 515 |
| C15orf60 | -0.14313 | 0.001126 | 0.003741 | 515 | 191 |
| INS-IGF2 | -0.14312 | 0.001126 | 0.003741 | 515 | 197 |
| CPLX2    | -0.14307 | 0.001131 | 0.003755 | 515 | 391 |
| PTBP1    | -0.14301 | 0.001137 | 0.003771 | 515 | 515 |
| UAP1     | -0.14301 | 0.001137 | 0.003772 | 515 | 515 |
| MTMR2    | -0.14295 | 0.001143 | 0.00379  | 515 | 515 |
| INCA1    | -0.14292 | 0.001145 | 0.003797 | 515 | 515 |
| RHOBTB2  | -0.14281 | 0.001156 | 0.003829 | 515 | 515 |
| SOD1     | -0.14278 | 0.001158 | 0.003836 | 515 | 515 |
| SMARCD1  | -0.14277 | 0.001159 | 0.003839 | 515 | 515 |
| DSG1     | -0.14267 | 0.001168 | 0.003867 | 515 | 278 |
| ADAMTS20 | -0.14266 | 0.00117  | 0.003871 | 515 | 221 |
| FDX1L    | -0.1426  | 0.001175 | 0.003888 | 515 | 515 |
| KIAA0564 | -0.14246 | 0.001188 | 0.003929 | 515 | 515 |
| PRSS16   | -0.14246 | 0.001189 | 0.003931 | 515 | 515 |
| TSPAN12  | -0.14228 | 0.001206 | 0.003984 | 515 | 515 |
| FZD9     | -0.14223 | 0.001211 | 0.004    | 515 | 494 |
| CIT      | -0.1422  | 0.001214 | 0.004006 | 515 | 515 |
| ZNF467   | -0.14218 | 0.001216 | 0.004012 | 515 | 515 |
| COG8     | -0.14215 | 0.001219 | 0.004019 | 515 | 515 |
| GALNT7   | -0.14212 | 0.001221 | 0.004026 | 515 | 515 |
| COX5A    | -0.14208 | 0.001225 | 0.004038 | 515 | 515 |
| FGA      | -0.14204 | 0.00123  | 0.00405  | 515 | 510 |
| TJP2     | -0.14198 | 0.001236 | 0.004066 | 515 | 515 |
| GTF2H4   | -0.1419  | 0.001244 | 0.00409  | 515 | 515 |
| SPHAR    | -0.14178 | 0.001255 | 0.004128 | 515 | 515 |
| FAM98B   | -0.14175 | 0.001259 | 0.004136 | 515 | 515 |
| GUCY2E   | -0.14173 | 0.00126  | 0.00414  | 515 | 167 |
| FBXO22   | -0.14167 | 0.001266 | 0.004155 | 515 | 515 |
| CRK      | -0.14164 | 0.001269 | 0.004165 | 515 | 515 |
| TARBP1   | -0.14161 | 0.001273 | 0.004175 | 515 | 515 |

|           |          |          |          |     |     |
|-----------|----------|----------|----------|-----|-----|
| BDKRB2    | -0.14161 | 0.001273 | 0.004175 | 515 | 515 |
| EHBP1     | -0.14156 | 0.001278 | 0.004189 | 515 | 515 |
| AURKAIP1  | -0.14155 | 0.001279 | 0.004191 | 515 | 515 |
| WDR74     | -0.14154 | 0.00128  | 0.004195 | 515 | 515 |
| UFSP1     | -0.14151 | 0.001283 | 0.004202 | 515 | 515 |
| IMP4      | -0.1415  | 0.001284 | 0.004205 | 515 | 515 |
| APOA5     | -0.1415  | 0.001284 | 0.004205 | 515 | 244 |
| TOP1P2    | -0.14145 | 0.001289 | 0.00422  | 515 | 515 |
| FLOT1     | -0.14145 | 0.001289 | 0.00422  | 515 | 515 |
| TBC1D22B  | -0.14144 | 0.00129  | 0.004224 | 515 | 515 |
| NCRNA0018 | -0.14143 | 0.001291 | 0.004225 | 515 | 236 |
| GTF2F2    | -0.14143 | 0.001291 | 0.004226 | 515 | 515 |
| CKMT1A    | -0.14142 | 0.001292 | 0.004228 | 515 | 499 |
| CCK       | -0.14141 | 0.001293 | 0.004228 | 515 | 336 |
| TMC4      | -0.14132 | 0.001302 | 0.004257 | 515 | 515 |
| TPRN      | -0.14131 | 0.001303 | 0.004259 | 515 | 515 |
| PNLIPRP3  | -0.1413  | 0.001304 | 0.004262 | 515 | 155 |
| STK3      | -0.14128 | 0.001307 | 0.00427  | 515 | 515 |
| UNC13B    | -0.14127 | 0.001308 | 0.004271 | 515 | 515 |
| MPI       | -0.14115 | 0.00132  | 0.004306 | 515 | 515 |
| NSUN4     | -0.14115 | 0.00132  | 0.004306 | 515 | 515 |
| RPL4      | -0.14111 | 0.001324 | 0.004319 | 515 | 515 |
| KDM6B     | -0.14108 | 0.001328 | 0.004331 | 515 | 515 |
| KIAA1279  | -0.14102 | 0.001335 | 0.004349 | 515 | 515 |
| PRSS27    | -0.141   | 0.001336 | 0.004352 | 515 | 515 |
| CALR      | -0.14099 | 0.001338 | 0.004357 | 515 | 515 |
| ERCC2     | -0.14098 | 0.001338 | 0.004358 | 515 | 515 |
| SLC4A2    | -0.14094 | 0.001343 | 0.004372 | 515 | 515 |
| SLC19A1   | -0.14093 | 0.001343 | 0.004373 | 515 | 515 |
| LOC283404 | -0.14092 | 0.001345 | 0.004377 | 515 | 387 |
| GTPBP3    | -0.14087 | 0.001351 | 0.004392 | 515 | 515 |
| TCTN3     | -0.14085 | 0.001352 | 0.004395 | 515 | 515 |
| SHISA4    | -0.14084 | 0.001353 | 0.004397 | 515 | 515 |
| LOC100130 | -0.14083 | 0.001354 | 0.004401 | 515 | 514 |
| SLC25A13  | -0.1408  | 0.001358 | 0.004412 | 515 | 515 |
| DOLPP1    | -0.14073 | 0.001365 | 0.004432 | 515 | 515 |
| ECE2      | -0.14065 | 0.001375 | 0.00446  | 515 | 515 |
| MAGEA1    | -0.1406  | 0.00138  | 0.004476 | 515 | 216 |
| CDK5RAP1  | -0.14049 | 0.001391 | 0.004509 | 515 | 515 |
| SLC25A4   | -0.14046 | 0.001395 | 0.004518 | 515 | 515 |
| PAH       | -0.14041 | 0.001401 | 0.004535 | 515 | 399 |
| RAB5B     | -0.14037 | 0.001405 | 0.004549 | 515 | 515 |
| SGSM2     | -0.14027 | 0.001416 | 0.004584 | 515 | 515 |
| EVPL      | -0.14022 | 0.001422 | 0.0046   | 515 | 515 |
| POR       | -0.14018 | 0.001427 | 0.004614 | 515 | 515 |
| NBAS      | -0.14018 | 0.001427 | 0.004614 | 515 | 515 |
| FAM10A4   | -0.14014 | 0.001431 | 0.004627 | 515 | 515 |
| YY1AP1    | -0.14009 | 0.001436 | 0.004641 | 515 | 515 |
| EFTUD1    | -0.14006 | 0.001441 | 0.004655 | 515 | 515 |
| ANKRD16   | -0.14005 | 0.001442 | 0.004656 | 515 | 515 |
| DDTL      | -0.13994 | 0.001455 | 0.004696 | 515 | 515 |
| LOC25845  | -0.1399  | 0.001459 | 0.004708 | 515 | 515 |
| GAL3ST1   | -0.13976 | 0.001475 | 0.004756 | 515 | 515 |
| C17orf89  | -0.13976 | 0.001475 | 0.004757 | 515 | 515 |

|           |          |          |          |     |     |
|-----------|----------|----------|----------|-----|-----|
| PCMTD2    | -0.13975 | 0.001476 | 0.004759 | 515 | 515 |
| VDAC2     | -0.13971 | 0.001481 | 0.004772 | 515 | 515 |
| TGIF1     | -0.13971 | 0.001481 | 0.004772 | 515 | 515 |
| HOXC13    | -0.13971 | 0.001481 | 0.004772 | 515 | 348 |
| ESF1      | -0.13967 | 0.001485 | 0.004785 | 515 | 515 |
| TRAK1     | -0.13966 | 0.001487 | 0.004791 | 515 | 515 |
| PEX5      | -0.13964 | 0.001489 | 0.004795 | 515 | 515 |
| DMRTC1    | -0.13952 | 0.001503 | 0.004838 | 515 | 98  |
| SHROOM3   | -0.13948 | 0.001508 | 0.004853 | 515 | 515 |
| CSNK2A1   | -0.13947 | 0.001509 | 0.004856 | 515 | 515 |
| CELSR1    | -0.13946 | 0.00151  | 0.004858 | 515 | 515 |
| PRDM7     | -0.13934 | 0.001525 | 0.004904 | 515 | 189 |
| METR1     | -0.1393  | 0.001529 | 0.004917 | 515 | 515 |
| PBX1      | -0.13928 | 0.001532 | 0.004924 | 515 | 515 |
| SUN1      | -0.13925 | 0.001536 | 0.004934 | 515 | 515 |
| HYI       | -0.13912 | 0.001552 | 0.00498  | 515 | 515 |
| AMBP      | -0.1391  | 0.001553 | 0.004984 | 515 | 487 |
| MRPL12    | -0.13909 | 0.001556 | 0.004989 | 515 | 515 |
| OCRL      | -0.13908 | 0.001556 | 0.004989 | 515 | 515 |
| KIAA0319  | -0.13903 | 0.001562 | 0.005006 | 515 | 513 |
| CENPB     | -0.13901 | 0.001565 | 0.005016 | 515 | 515 |
| SMCR5     | -0.13891 | 0.001577 | 0.005052 | 515 | 346 |
| BAD       | -0.13889 | 0.00158  | 0.005061 | 515 | 515 |
| EPHB4     | -0.13888 | 0.001581 | 0.005064 | 515 | 515 |
| AKT1S1    | -0.13886 | 0.001584 | 0.005071 | 515 | 515 |
| ADAM2     | -0.13885 | 0.001584 | 0.005072 | 515 | 102 |
| KIAA1244  | -0.13885 | 0.001585 | 0.005072 | 515 | 515 |
| BASE      | -0.13884 | 0.001586 | 0.005076 | 515 | 138 |
| OPHN1     | -0.13883 | 0.001587 | 0.005077 | 515 | 515 |
| SLC44A4   | -0.13882 | 0.001589 | 0.005083 | 515 | 515 |
| EIF5A     | -0.1388  | 0.001591 | 0.005088 | 515 | 515 |
| C20orf117 | -0.13879 | 0.001592 | 0.00509  | 515 | 515 |
| CCT6A     | -0.13879 | 0.001592 | 0.00509  | 515 | 515 |
| RPUSD2    | -0.13873 | 0.0016   | 0.005113 | 515 | 515 |
| LOC144776 | -0.13873 | 0.001601 | 0.005114 | 515 | 26  |
| GEMIN8P4  | -0.13869 | 0.001605 | 0.005126 | 515 | 515 |
| SPERT     | -0.13865 | 0.001611 | 0.00514  | 515 | 378 |
| SLC6A8    | -0.13864 | 0.001611 | 0.00514  | 515 | 515 |
| SUMF2     | -0.13862 | 0.001613 | 0.005147 | 515 | 515 |
| CARD18    | -0.1386  | 0.001616 | 0.005155 | 515 | 67  |
| ZNF775    | -0.13859 | 0.001618 | 0.00516  | 515 | 515 |
| C16orf59  | -0.13856 | 0.001622 | 0.00517  | 515 | 515 |
| RPL37     | -0.13854 | 0.001624 | 0.005178 | 515 | 515 |
| ARMC7     | -0.13845 | 0.001636 | 0.005212 | 515 | 515 |
| CHRNA9    | -0.13843 | 0.001639 | 0.00522  | 515 | 413 |
| TMEM107   | -0.13841 | 0.001641 | 0.005225 | 515 | 515 |
| MRPL53    | -0.1384  | 0.001642 | 0.005227 | 515 | 515 |
| GCN1L1    | -0.1384  | 0.001642 | 0.005227 | 515 | 515 |
| PMS2CL    | -0.13839 | 0.001644 | 0.005233 | 515 | 515 |
| AQR       | -0.13835 | 0.001649 | 0.005248 | 515 | 515 |
| SSBP3     | -0.13833 | 0.001651 | 0.005251 | 515 | 515 |
| GRK1      | -0.13831 | 0.001654 | 0.00526  | 515 | 291 |
| TMEM68    | -0.13817 | 0.001672 | 0.005311 | 515 | 515 |
| CA5A      | -0.13816 | 0.001673 | 0.005314 | 515 | 165 |

|          |          |          |          |     |     |
|----------|----------|----------|----------|-----|-----|
| MEA1     | -0.13814 | 0.001676 | 0.005321 | 515 | 515 |
| CUL4A    | -0.13808 | 0.001684 | 0.005347 | 515 | 515 |
| BACE2    | -0.13806 | 0.001686 | 0.005351 | 515 | 515 |
| IGDCC3   | -0.13804 | 0.00169  | 0.00536  | 515 | 413 |
| STK25    | -0.13801 | 0.001693 | 0.005369 | 515 | 515 |
| CYC1     | -0.13789 | 0.001708 | 0.005414 | 515 | 515 |
| SREBF1   | -0.13783 | 0.001717 | 0.00544  | 515 | 515 |
| MRPL9    | -0.13774 | 0.001729 | 0.005474 | 515 | 515 |
| PTPN14   | -0.13774 | 0.00173  | 0.005474 | 515 | 515 |
| ZBED4    | -0.13769 | 0.001736 | 0.005492 | 515 | 515 |
| KAT5     | -0.13766 | 0.00174  | 0.005504 | 515 | 515 |
| GTF2A2   | -0.13766 | 0.001741 | 0.005504 | 515 | 515 |
| GLTP     | -0.13765 | 0.001742 | 0.005504 | 515 | 515 |
| URB2     | -0.13765 | 0.001742 | 0.005504 | 515 | 515 |
| ZXDC     | -0.13765 | 0.001742 | 0.005504 | 515 | 515 |
| PREPL    | -0.13759 | 0.001749 | 0.005525 | 515 | 515 |
| RAB2A    | -0.13758 | 0.001751 | 0.00553  | 515 | 515 |
| TERT     | -0.13756 | 0.001754 | 0.005538 | 515 | 491 |
| HTATSF1  | -0.13753 | 0.001758 | 0.005549 | 515 | 515 |
| DAXX     | -0.13747 | 0.001766 | 0.005572 | 515 | 515 |
| NANOS1   | -0.13745 | 0.001768 | 0.005578 | 515 | 515 |
| MRPS15   | -0.13745 | 0.001769 | 0.005578 | 515 | 515 |
| C12orf52 | -0.13745 | 0.001769 | 0.005579 | 515 | 515 |
| BCL2L10  | -0.13742 | 0.001773 | 0.005588 | 515 | 447 |
| ATOH7    | -0.13736 | 0.001782 | 0.005614 | 515 | 422 |
| SF3A1    | -0.13735 | 0.001783 | 0.005615 | 515 | 515 |
| NPEPL1   | -0.1373  | 0.00179  | 0.005638 | 515 | 515 |
| GPRC5D   | -0.13719 | 0.001806 | 0.005679 | 515 | 513 |
| KCNK15   | -0.13719 | 0.001806 | 0.005679 | 515 | 511 |
| DDAH1    | -0.13714 | 0.001812 | 0.005698 | 515 | 515 |
| C1orf85  | -0.13714 | 0.001812 | 0.005698 | 515 | 515 |
| SH3BGRL2 | -0.1371  | 0.001818 | 0.005715 | 515 | 515 |
| MRPL43   | -0.13701 | 0.00183  | 0.005751 | 515 | 515 |
| RAB6C    | -0.13695 | 0.001839 | 0.005775 | 515 | 515 |
| C9orf152 | -0.13691 | 0.001845 | 0.005791 | 515 | 515 |
| CYP4F3   | -0.13685 | 0.001853 | 0.005814 | 515 | 467 |
| ACN9     | -0.13685 | 0.001854 | 0.005815 | 515 | 515 |
| RIT1     | -0.13683 | 0.001857 | 0.005823 | 515 | 515 |
| 6-Mar    | -0.13683 | 0.001857 | 0.005823 | 515 | 515 |
| TUBB8    | -0.13678 | 0.001863 | 0.005839 | 515 | 515 |
| PCK1     | -0.13678 | 0.001864 | 0.005841 | 515 | 309 |
| CRIPAK   | -0.13675 | 0.001868 | 0.005851 | 515 | 515 |
| SH2D4A   | -0.13674 | 0.00187  | 0.005856 | 515 | 515 |
| RETNLB   | -0.13673 | 0.001871 | 0.00586  | 515 | 130 |
| DUSP23   | -0.13672 | 0.001873 | 0.005864 | 515 | 515 |
| DDAH2    | -0.13668 | 0.001879 | 0.005879 | 515 | 515 |
| IRGQ     | -0.13668 | 0.001879 | 0.005879 | 515 | 515 |
| SPRYD4   | -0.13666 | 0.001882 | 0.005887 | 515 | 515 |
| IQCE     | -0.13665 | 0.001882 | 0.005887 | 515 | 515 |
| C2orf76  | -0.13647 | 0.001909 | 0.005968 | 515 | 515 |
| ZMYM2    | -0.13646 | 0.001911 | 0.005975 | 515 | 515 |
| SSR2     | -0.13643 | 0.001916 | 0.005986 | 515 | 515 |
| SMTN     | -0.13643 | 0.001916 | 0.005986 | 515 | 515 |
| DAZAP1   | -0.13631 | 0.001933 | 0.006034 | 515 | 515 |

|           |          |          |          |     |     |
|-----------|----------|----------|----------|-----|-----|
| DGCR14    | -0.1363  | 0.001934 | 0.006036 | 515 | 515 |
| NAT8L     | -0.13623 | 0.001945 | 0.006068 | 515 | 507 |
| CHD7      | -0.13623 | 0.001945 | 0.006068 | 515 | 515 |
| ZNF771    | -0.1362  | 0.00195  | 0.006083 | 515 | 515 |
| SMCR7     | -0.13617 | 0.001954 | 0.006094 | 515 | 515 |
| ENAH      | -0.13616 | 0.001955 | 0.006097 | 515 | 515 |
| COQ7      | -0.13616 | 0.001956 | 0.006099 | 515 | 515 |
| ASH1L     | -0.13615 | 0.001957 | 0.006102 | 515 | 515 |
| NROB1     | -0.13614 | 0.001959 | 0.006106 | 515 | 249 |
| BCAR1     | -0.13609 | 0.001966 | 0.006124 | 515 | 515 |
| PRMT7     | -0.13606 | 0.001971 | 0.006136 | 515 | 515 |
| ATF7      | -0.13606 | 0.001971 | 0.006136 | 515 | 515 |
| HGS       | -0.13603 | 0.001975 | 0.006149 | 515 | 515 |
| CRTC2     | -0.13595 | 0.001987 | 0.006182 | 515 | 515 |
| COX15     | -0.13593 | 0.001991 | 0.006193 | 515 | 515 |
| CEP63     | -0.1359  | 0.001996 | 0.006206 | 515 | 515 |
| DNAJC5    | -0.13589 | 0.001998 | 0.006212 | 515 | 515 |
| MAST1     | -0.13583 | 0.002006 | 0.006237 | 515 | 514 |
| FAM132A   | -0.13582 | 0.002008 | 0.006241 | 515 | 494 |
| PPL       | -0.13574 | 0.00202  | 0.006278 | 515 | 515 |
| MFF       | -0.13567 | 0.002032 | 0.006312 | 515 | 515 |
| RPAIN     | -0.13561 | 0.002041 | 0.00634  | 515 | 515 |
| MSI2      | -0.13559 | 0.002043 | 0.006346 | 515 | 515 |
| CDON      | -0.13558 | 0.002046 | 0.006353 | 515 | 515 |
| RASL10B   | -0.13556 | 0.002048 | 0.006357 | 515 | 515 |
| DYNC1LI2  | -0.1355  | 0.002058 | 0.006384 | 515 | 515 |
| PCNT      | -0.13549 | 0.00206  | 0.006389 | 515 | 515 |
| GOLGA6L9  | -0.13545 | 0.002066 | 0.006406 | 515 | 515 |
| ATP5G2    | -0.13531 | 0.002088 | 0.00647  | 515 | 515 |
| LOC100132 | -0.1353  | 0.00209  | 0.006477 | 515 | 511 |
| TAF15     | -0.13529 | 0.002092 | 0.006481 | 515 | 515 |
| MEF2D     | -0.13525 | 0.002098 | 0.006498 | 515 | 515 |
| PYROXD2   | -0.13523 | 0.002101 | 0.006507 | 515 | 515 |
| FTSJ3     | -0.13518 | 0.002109 | 0.006528 | 515 | 515 |
| TAT       | -0.13516 | 0.002113 | 0.006539 | 515 | 492 |
| HSF4      | -0.13514 | 0.002116 | 0.006548 | 515 | 515 |
| PIAS4     | -0.13513 | 0.002117 | 0.006548 | 515 | 515 |
| C5orf33   | -0.13511 | 0.002121 | 0.006559 | 515 | 515 |
| NUTF2     | -0.13506 | 0.002129 | 0.006581 | 515 | 515 |
| C10orf41  | -0.13501 | 0.002137 | 0.006599 | 515 | 515 |
| MAGEA2    | -0.13501 | 0.002137 | 0.006599 | 515 | 236 |
| SPCS2     | -0.13498 | 0.002142 | 0.006613 | 515 | 515 |
| GABRG2    | -0.13498 | 0.002143 | 0.006614 | 515 | 147 |
| EBP       | -0.13495 | 0.002147 | 0.006627 | 515 | 515 |
| ACO2      | -0.13475 | 0.00218  | 0.00672  | 515 | 515 |
| NCRNA0009 | -0.1347  | 0.002189 | 0.006745 | 515 | 515 |
| FBXL6     | -0.13463 | 0.002201 | 0.006779 | 515 | 515 |
| PPFIA3    | -0.13457 | 0.00221  | 0.006804 | 515 | 515 |
| ALG1      | -0.13454 | 0.002215 | 0.006817 | 515 | 515 |
| CRYAA     | -0.13447 | 0.002228 | 0.006851 | 515 | 194 |
| PIAS3     | -0.13445 | 0.00223  | 0.006857 | 515 | 515 |
| PUM2      | -0.13445 | 0.002231 | 0.006857 | 515 | 515 |
| D2HGDH    | -0.13443 | 0.002235 | 0.006867 | 515 | 515 |
| POLR2H    | -0.13434 | 0.00225  | 0.006909 | 515 | 515 |



|          |          |          |          |     |     |
|----------|----------|----------|----------|-----|-----|
| JTB      | -0.13431 | 0.002255 | 0.006923 | 515 | 515 |
| RNF186   | -0.13423 | 0.002268 | 0.006955 | 515 | 441 |
| CGREF1   | -0.13423 | 0.002269 | 0.006956 | 515 | 515 |
| FLJ45244 | -0.13419 | 0.002275 | 0.006975 | 515 | 515 |
| FANCE    | -0.13415 | 0.002282 | 0.006995 | 515 | 515 |
| SOCS6    | -0.13414 | 0.002285 | 0.007001 | 515 | 515 |
| G6PD     | -0.13398 | 0.002313 | 0.007081 | 515 | 515 |
| STOX2    | -0.13393 | 0.002322 | 0.007106 | 515 | 513 |
| SLC19A2  | -0.13391 | 0.002325 | 0.007113 | 515 | 515 |
| MANF     | -0.13382 | 0.002342 | 0.007161 | 515 | 515 |
| RAB6A    | -0.13381 | 0.002342 | 0.007162 | 515 | 515 |
| NDUFC2   | -0.1338  | 0.002344 | 0.007165 | 515 | 515 |
| GOLGA5   | -0.13376 | 0.002352 | 0.007186 | 515 | 515 |
| DYNC1I1  | -0.13372 | 0.00236  | 0.007208 | 515 | 515 |
| BTRC     | -0.13371 | 0.002361 | 0.007211 | 515 | 515 |
| TMEM151A | -0.13366 | 0.00237  | 0.007235 | 515 | 458 |
| HARS2    | -0.13351 | 0.002397 | 0.007313 | 515 | 515 |
| OAT      | -0.13347 | 0.002404 | 0.007332 | 515 | 515 |
| ODF4     | -0.13343 | 0.002411 | 0.007351 | 515 | 56  |
| CBFA2T2  | -0.1334  | 0.002417 | 0.007367 | 515 | 515 |
| TRIM37   | -0.13338 | 0.002421 | 0.007377 | 515 | 515 |
| PLA2G6   | -0.13337 | 0.002423 | 0.007382 | 515 | 515 |
| VCX3A    | -0.13335 | 0.002425 | 0.007389 | 515 | 352 |
| ZNF774   | -0.13335 | 0.002427 | 0.007392 | 515 | 515 |
| GLOD4    | -0.13326 | 0.002444 | 0.007438 | 515 | 515 |
| RPS19BP1 | -0.13326 | 0.002444 | 0.007438 | 515 | 515 |
| FBXL8    | -0.13324 | 0.002447 | 0.007448 | 515 | 514 |
| ATOH1    | -0.13323 | 0.002449 | 0.007453 | 515 | 61  |
| UBAC2    | -0.13322 | 0.00245  | 0.007454 | 515 | 515 |
| FAM127B  | -0.13321 | 0.002452 | 0.007458 | 515 | 515 |
| CCDC121  | -0.1332  | 0.002455 | 0.007464 | 515 | 515 |
| ADAT3    | -0.13319 | 0.002457 | 0.007469 | 515 | 515 |
| GEMIN8   | -0.13316 | 0.002462 | 0.007483 | 515 | 515 |
| FDXR     | -0.13313 | 0.002468 | 0.007499 | 515 | 515 |
| ZNF414   | -0.1331  | 0.002473 | 0.00751  | 515 | 515 |
| LBX2     | -0.13301 | 0.002489 | 0.00756  | 515 | 511 |
| FDFT1    | -0.13298 | 0.002495 | 0.007574 | 515 | 515 |
| C8G      | -0.13294 | 0.002502 | 0.007595 | 515 | 461 |
| PLEKHA1  | -0.13294 | 0.002503 | 0.007595 | 515 | 515 |
| UBR3     | -0.13292 | 0.002506 | 0.0076   | 515 | 515 |
| FDPS     | -0.13288 | 0.002515 | 0.007624 | 515 | 515 |
| RABIF    | -0.13285 | 0.002519 | 0.007636 | 515 | 515 |
| HNRNPH3  | -0.13281 | 0.002528 | 0.00766  | 515 | 515 |
| KSR1     | -0.1328  | 0.00253  | 0.007665 | 515 | 515 |
| TDRD5    | -0.13277 | 0.002536 | 0.007679 | 515 | 458 |
| EIF3J    | -0.13276 | 0.002537 | 0.007681 | 515 | 515 |
| TMEM80   | -0.13274 | 0.002541 | 0.007692 | 515 | 515 |
| SCCPDH   | -0.13273 | 0.002544 | 0.007701 | 515 | 515 |
| MRPL37   | -0.13268 | 0.002553 | 0.007725 | 515 | 515 |
| ST7      | -0.13268 | 0.002553 | 0.007725 | 515 | 515 |
| C16orf48 | -0.13266 | 0.002557 | 0.007734 | 515 | 515 |
| ATG2A    | -0.13261 | 0.002567 | 0.007762 | 515 | 515 |
| BRMS1    | -0.13255 | 0.002578 | 0.007794 | 515 | 515 |
| TANC1    | -0.1325  | 0.002587 | 0.007818 | 515 | 515 |

|           |          |          |          |     |     |
|-----------|----------|----------|----------|-----|-----|
| PAF1      | -0.13246 | 0.002595 | 0.00784  | 515 | 515 |
| SLC22A5   | -0.13245 | 0.002597 | 0.007846 | 515 | 515 |
| FBXL18    | -0.13245 | 0.002598 | 0.007847 | 515 | 515 |
| LOC339674 | -0.13244 | 0.0026   | 0.007852 | 515 | 444 |
| CDH15     | -0.13242 | 0.002604 | 0.007861 | 515 | 512 |
| PPFIA1    | -0.13238 | 0.002611 | 0.00788  | 515 | 515 |
| KIAA1239  | -0.13236 | 0.002615 | 0.007891 | 515 | 170 |
| WRAP53    | -0.13231 | 0.002624 | 0.007914 | 515 | 515 |
| CRYBA2    | -0.13231 | 0.002624 | 0.007914 | 515 | 243 |
| GP2       | -0.13231 | 0.002626 | 0.007918 | 515 | 222 |
| ATAD3B    | -0.13229 | 0.002629 | 0.007925 | 515 | 515 |
| MBTD1     | -0.13229 | 0.00263  | 0.007925 | 515 | 515 |
| VIPR2     | -0.13222 | 0.002643 | 0.007959 | 515 | 474 |
| C1orf106  | -0.13221 | 0.002645 | 0.007962 | 515 | 515 |
| TCTA      | -0.13221 | 0.002645 | 0.007963 | 515 | 515 |
| NXNL2     | -0.13215 | 0.002656 | 0.007992 | 515 | 370 |
| SPHK2     | -0.13215 | 0.002657 | 0.007992 | 515 | 515 |
| SFXN4     | -0.13211 | 0.002665 | 0.008014 | 515 | 515 |
| RRP1B     | -0.1321  | 0.002666 | 0.008018 | 515 | 515 |
| SEC16A    | -0.1321  | 0.002668 | 0.008021 | 515 | 515 |
| CTAG1B    | -0.13205 | 0.002677 | 0.008046 | 515 | 192 |
| MRPL55    | -0.132   | 0.002687 | 0.00807  | 515 | 515 |
| AKTIP     | -0.132   | 0.002688 | 0.008074 | 515 | 515 |
| TFAMP1    | -0.13197 | 0.002692 | 0.008084 | 515 | 318 |
| MTPAP     | -0.13197 | 0.002693 | 0.008084 | 515 | 515 |
| DHX33     | -0.13195 | 0.002698 | 0.008096 | 515 | 515 |
| TECPR2    | -0.13194 | 0.002699 | 0.008098 | 515 | 515 |
| C1orf198  | -0.13192 | 0.002703 | 0.008111 | 515 | 515 |
| CYB5R3    | -0.13191 | 0.002705 | 0.008113 | 515 | 515 |
| ATP4B     | -0.1319  | 0.002708 | 0.008121 | 515 | 384 |
| SNRNP48   | -0.13188 | 0.002711 | 0.00813  | 515 | 515 |
| RPS10P7   | -0.13187 | 0.002714 | 0.008137 | 515 | 515 |
| ATP5G1    | -0.13186 | 0.002716 | 0.008141 | 515 | 515 |
| RAVER1    | -0.13184 | 0.002719 | 0.008148 | 515 | 515 |
| CDCA7L    | -0.13184 | 0.00272  | 0.008149 | 515 | 515 |
| KIAA1967  | -0.13183 | 0.002721 | 0.008151 | 515 | 515 |
| SRPK1     | -0.13181 | 0.002726 | 0.00816  | 515 | 515 |
| RHOB      | -0.13179 | 0.00273  | 0.008169 | 515 | 515 |
| BEST4     | -0.13178 | 0.002732 | 0.008175 | 515 | 513 |
| ACAP3     | -0.13176 | 0.002736 | 0.008185 | 515 | 515 |
| C7orf26   | -0.13175 | 0.002738 | 0.008187 | 515 | 515 |
| CPSF1     | -0.13174 | 0.002741 | 0.008196 | 515 | 515 |
| PLEKHG6   | -0.1317  | 0.002749 | 0.008214 | 515 | 515 |
| PHRF1     | -0.13165 | 0.002758 | 0.008239 | 515 | 515 |
| CDH24     | -0.13165 | 0.002759 | 0.008241 | 515 | 515 |
| HNRNPA1   | -0.13164 | 0.002761 | 0.008243 | 515 | 515 |
| CCDC124   | -0.13164 | 0.002761 | 0.008243 | 515 | 515 |
| PRR19     | -0.1316  | 0.00277  | 0.008265 | 515 | 515 |
| GPR81     | -0.13159 | 0.002772 | 0.008269 | 515 | 510 |
| LRP4      | -0.13154 | 0.002781 | 0.008294 | 515 | 515 |
| SLC29A4   | -0.13153 | 0.002784 | 0.008302 | 515 | 515 |
| ALG1L     | -0.13151 | 0.002789 | 0.008315 | 515 | 514 |
| PANX2     | -0.13148 | 0.002794 | 0.008325 | 515 | 515 |
| COQ6      | -0.13145 | 0.0028   | 0.00834  | 515 | 515 |

|           |          |          |          |     |     |
|-----------|----------|----------|----------|-----|-----|
| LOC90246  | -0.13142 | 0.002807 | 0.00836  | 515 | 515 |
| ANKRD11   | -0.13137 | 0.002817 | 0.008384 | 515 | 515 |
| C19orf41  | -0.13137 | 0.002818 | 0.008387 | 515 | 221 |
| DMAP1     | -0.13134 | 0.002823 | 0.008398 | 515 | 515 |
| TESC      | -0.13133 | 0.002826 | 0.008403 | 515 | 515 |
| GRB7      | -0.13132 | 0.002829 | 0.00841  | 515 | 515 |
| YBX2      | -0.13131 | 0.002831 | 0.008414 | 515 | 500 |
| NDUFA5    | -0.13129 | 0.002835 | 0.008421 | 515 | 515 |
| XP07      | -0.13127 | 0.00284  | 0.008434 | 515 | 515 |
| ZNF786    | -0.13124 | 0.002846 | 0.008451 | 515 | 515 |
| CLGN      | -0.13122 | 0.002849 | 0.008457 | 515 | 512 |
| CPS1      | -0.13116 | 0.002863 | 0.008494 | 515 | 514 |
| NRF1      | -0.13115 | 0.002864 | 0.008496 | 515 | 515 |
| CHD4      | -0.13113 | 0.00287  | 0.008512 | 515 | 515 |
| RBBP4     | -0.13108 | 0.002878 | 0.008534 | 515 | 515 |
| CNGA1     | -0.13107 | 0.002881 | 0.00854  | 515 | 510 |
| HIST1H3I  | -0.13106 | 0.002884 | 0.008547 | 515 | 215 |
| CMTM8     | -0.13104 | 0.002889 | 0.008562 | 515 | 515 |
| GPR62     | -0.13102 | 0.002892 | 0.008568 | 515 | 443 |
| NOTUM     | -0.13098 | 0.002901 | 0.008591 | 515 | 514 |
| FUT2      | -0.13097 | 0.002903 | 0.008595 | 515 | 515 |
| KIF5B     | -0.13096 | 0.002905 | 0.008601 | 515 | 515 |
| C7orf4    | -0.13094 | 0.002909 | 0.008612 | 515 | 278 |
| WDR90     | -0.13091 | 0.002915 | 0.008629 | 515 | 515 |
| DID01     | -0.13089 | 0.00292  | 0.008641 | 515 | 515 |
| FBX024    | -0.13087 | 0.002925 | 0.008654 | 515 | 512 |
| SERINC4   | -0.13086 | 0.002928 | 0.008662 | 515 | 499 |
| ST14      | -0.13084 | 0.002933 | 0.008675 | 515 | 515 |
| UTP14A    | -0.13079 | 0.002942 | 0.008702 | 515 | 515 |
| C1orf64   | -0.13071 | 0.002961 | 0.008751 | 515 | 266 |
| RAB11B    | -0.1307  | 0.002962 | 0.008752 | 515 | 515 |
| PLSCR5    | -0.1306  | 0.002984 | 0.008813 | 515 | 55  |
| C1orf89   | -0.13056 | 0.002994 | 0.008844 | 515 | 515 |
| STRBP     | -0.13054 | 0.002999 | 0.008856 | 515 | 515 |
| TMEM87A   | -0.13053 | 0.003    | 0.008858 | 515 | 515 |
| ERAL1     | -0.13046 | 0.003017 | 0.0089   | 515 | 515 |
| POLR1D    | -0.13042 | 0.003025 | 0.008918 | 515 | 515 |
| MYH7B     | -0.13039 | 0.003031 | 0.008935 | 515 | 510 |
| RNF214    | -0.13034 | 0.003042 | 0.008964 | 515 | 515 |
| NFKBIL2   | -0.13027 | 0.003059 | 0.009011 | 515 | 515 |
| ZNF620    | -0.13024 | 0.003065 | 0.009028 | 515 | 515 |
| SCD       | -0.13021 | 0.003073 | 0.009048 | 515 | 515 |
| TC2N      | -0.1302  | 0.003075 | 0.009053 | 515 | 515 |
| ALDOA     | -0.13016 | 0.003084 | 0.009075 | 515 | 515 |
| NRD1      | -0.13014 | 0.003088 | 0.009086 | 515 | 515 |
| MOCS3     | -0.13012 | 0.003094 | 0.009102 | 515 | 515 |
| CHMP4C    | -0.13011 | 0.003096 | 0.009107 | 515 | 515 |
| PARD6A    | -0.13007 | 0.003104 | 0.009126 | 515 | 515 |
| SNRPC     | -0.13002 | 0.003117 | 0.009161 | 515 | 515 |
| SLC35C1   | -0.13001 | 0.003119 | 0.009165 | 515 | 515 |
| NCRNA0016 | -0.13    | 0.003122 | 0.00917  | 515 | 349 |
| HBXIP     | -0.12999 | 0.003123 | 0.009172 | 515 | 515 |
| DYNLRB1   | -0.12997 | 0.003129 | 0.009188 | 515 | 515 |
| PAPPA2    | -0.12997 | 0.003129 | 0.009188 | 515 | 395 |

|           |          |          |          |     |     |
|-----------|----------|----------|----------|-----|-----|
| LOC100144 | -0.12992 | 0.003139 | 0.009215 | 515 | 444 |
| RPTOR     | -0.12992 | 0.003139 | 0.009215 | 515 | 515 |
| HECTD3    | -0.12984 | 0.003158 | 0.009266 | 515 | 515 |
| TSNAX     | -0.12982 | 0.003163 | 0.009277 | 515 | 515 |
| C15orf17  | -0.12979 | 0.00317  | 0.009297 | 515 | 515 |
| CTCF      | -0.12979 | 0.003171 | 0.009298 | 515 | 515 |
| GAR1      | -0.12977 | 0.003174 | 0.009305 | 515 | 515 |
| INTS4     | -0.12976 | 0.003177 | 0.009313 | 515 | 515 |
| TMEM134   | -0.12975 | 0.003179 | 0.009316 | 515 | 515 |
| LINGO1    | -0.12965 | 0.003202 | 0.009377 | 515 | 515 |
| AGRN      | -0.12964 | 0.003207 | 0.009388 | 515 | 515 |
| BRIX1     | -0.12963 | 0.003209 | 0.009392 | 515 | 515 |
| C2orf24   | -0.12958 | 0.003219 | 0.009417 | 515 | 515 |
| C5orf22   | -0.12955 | 0.003227 | 0.009438 | 515 | 515 |
| NCKAP1    | -0.12952 | 0.003233 | 0.009456 | 515 | 515 |
| LMTK2     | -0.12951 | 0.003237 | 0.009463 | 515 | 515 |
| LOC100133 | -0.12951 | 0.003237 | 0.009463 | 515 | 456 |
| NUBP2     | -0.12949 | 0.003242 | 0.009476 | 515 | 515 |
| MAGEA3    | -0.12948 | 0.003243 | 0.009478 | 515 | 273 |
| SLC5A2    | -0.12943 | 0.003257 | 0.009515 | 515 | 409 |
| TMEM59    | -0.12941 | 0.003261 | 0.009524 | 515 | 515 |
| SLC35B1   | -0.12939 | 0.003266 | 0.009538 | 515 | 515 |
| EPN1      | -0.12937 | 0.003271 | 0.009551 | 515 | 515 |
| FOXN1     | -0.12936 | 0.003272 | 0.009552 | 515 | 456 |
| GDAP1     | -0.12932 | 0.003283 | 0.009581 | 515 | 515 |
| FBRS      | -0.12929 | 0.003291 | 0.009599 | 515 | 515 |
| NKX6-2    | -0.12924 | 0.003302 | 0.009626 | 515 | 64  |
| MEPCE     | -0.12923 | 0.003304 | 0.009632 | 515 | 515 |
| SLC06A1   | -0.12923 | 0.003305 | 0.009633 | 515 | 173 |
| BCAT2     | -0.12922 | 0.003306 | 0.009635 | 515 | 515 |
| TSG101    | -0.12921 | 0.003309 | 0.009641 | 515 | 515 |
| RCOR1     | -0.1292  | 0.003312 | 0.009649 | 515 | 515 |
| SOX11     | -0.12917 | 0.00332  | 0.009672 | 515 | 491 |
| TUBB2C    | -0.12913 | 0.003329 | 0.009695 | 515 | 515 |
| PAAF1     | -0.12913 | 0.00333  | 0.009697 | 515 | 515 |
| BARX1     | -0.12912 | 0.003332 | 0.009701 | 515 | 457 |
| ETV4      | -0.12907 | 0.003345 | 0.009737 | 515 | 515 |
| UBE2K     | -0.12906 | 0.003347 | 0.009742 | 515 | 515 |
| USP54     | -0.12903 | 0.003354 | 0.009761 | 515 | 515 |
| PCDHA5    | -0.12897 | 0.003369 | 0.009801 | 515 | 486 |
| CLCA1     | -0.12895 | 0.003373 | 0.00981  | 515 | 135 |
| TMEM129   | -0.12878 | 0.003416 | 0.009928 | 515 | 515 |
| CCNJ      | -0.12875 | 0.003423 | 0.009946 | 515 | 515 |
| KIAA1324  | -0.12866 | 0.003445 | 0.010007 | 515 | 515 |
| CSNK1A1P  | -0.12865 | 0.003448 | 0.010012 | 515 | 298 |
| WBSCR22   | -0.12864 | 0.003453 | 0.010023 | 515 | 515 |
| SPDEF     | -0.12856 | 0.003472 | 0.010074 | 515 | 515 |
| SRGAP1    | -0.12855 | 0.003475 | 0.010081 | 515 | 515 |
| NCOR1     | -0.12854 | 0.003478 | 0.010087 | 515 | 515 |
| TAF8      | -0.12849 | 0.003489 | 0.010115 | 515 | 515 |
| HOXC10    | -0.12846 | 0.003497 | 0.010134 | 515 | 402 |
| TUBB4     | -0.12842 | 0.003507 | 0.010162 | 515 | 515 |
| ATP13A2   | -0.12841 | 0.00351  | 0.010168 | 515 | 515 |
| CDC5L     | -0.12841 | 0.003511 | 0.010168 | 515 | 515 |

|           |          |          |          |     |     |
|-----------|----------|----------|----------|-----|-----|
| ARHGEF5   | -0.12837 | 0.00352  | 0.010194 | 515 | 515 |
| RUVBL1    | -0.12832 | 0.003533 | 0.010226 | 515 | 515 |
| TP53INP2  | -0.12824 | 0.003554 | 0.010278 | 515 | 515 |
| RDBP      | -0.1282  | 0.003566 | 0.010311 | 515 | 515 |
| FAM3B     | -0.12817 | 0.003572 | 0.010327 | 515 | 515 |
| PHPT1     | -0.12811 | 0.00359  | 0.010371 | 515 | 515 |
| CFHR5     | -0.12806 | 0.003602 | 0.010404 | 515 | 152 |
| C1orf122  | -0.12803 | 0.003609 | 0.010422 | 515 | 515 |
| NCRNA0016 | -0.12794 | 0.003633 | 0.010488 | 515 | 205 |
| SF3B3     | -0.1279  | 0.003643 | 0.010514 | 515 | 515 |
| C17orf37  | -0.12782 | 0.003666 | 0.010574 | 515 | 515 |
| EIF4ENIF1 | -0.1278  | 0.003672 | 0.010588 | 515 | 515 |
| DCAF6     | -0.12778 | 0.003677 | 0.0106   | 515 | 515 |
| SSR1      | -0.12778 | 0.003678 | 0.010601 | 515 | 515 |
| KLF15     | -0.12776 | 0.003683 | 0.010613 | 515 | 515 |
| ZMYM3     | -0.12773 | 0.003691 | 0.010635 | 515 | 515 |
| LCN15     | -0.12769 | 0.0037   | 0.010658 | 515 | 100 |
| NKX2-3    | -0.12766 | 0.00371  | 0.010682 | 515 | 355 |
| DACT2     | -0.12758 | 0.00373  | 0.010732 | 515 | 505 |
| EPB41L4B  | -0.12754 | 0.003743 | 0.010764 | 515 | 515 |
| IQCD      | -0.12753 | 0.003744 | 0.010766 | 515 | 515 |
| ZNF643    | -0.12751 | 0.003749 | 0.010779 | 515 | 515 |
| WIBG      | -0.12751 | 0.00375  | 0.010781 | 515 | 515 |
| C19orf26  | -0.1275  | 0.003752 | 0.010785 | 515 | 512 |
| MARK1     | -0.12745 | 0.003767 | 0.010826 | 515 | 515 |
| CASP6     | -0.12735 | 0.003793 | 0.010895 | 515 | 515 |
| SLC16A13  | -0.12735 | 0.003795 | 0.010897 | 515 | 515 |
| DQX1      | -0.12732 | 0.003802 | 0.010913 | 515 | 485 |
| SRPK3     | -0.12732 | 0.003802 | 0.010913 | 515 | 509 |
| ANKRD26   | -0.12726 | 0.003818 | 0.010957 | 515 | 515 |
| ADIPOR2   | -0.12723 | 0.003828 | 0.010983 | 515 | 515 |
| SLC6A2    | -0.12722 | 0.003831 | 0.010992 | 515 | 239 |
| LOC202781 | -0.12721 | 0.003832 | 0.010992 | 515 | 515 |
| GJB7      | -0.12721 | 0.003832 | 0.010992 | 515 | 433 |
| YPEL3     | -0.1271  | 0.003863 | 0.011069 | 515 | 515 |
| AMELY     | -0.1271  | 0.003864 | 0.011071 | 515 | 52  |
| BOLA1     | -0.12696 | 0.003904 | 0.011175 | 515 | 515 |
| TMEM120A  | -0.12694 | 0.00391  | 0.011188 | 515 | 515 |
| GPR98     | -0.12692 | 0.003916 | 0.011203 | 515 | 515 |
| TMEM17    | -0.1269  | 0.003921 | 0.011217 | 515 | 515 |
| PEBP1     | -0.12686 | 0.003931 | 0.011242 | 515 | 515 |
| FAM20B    | -0.12679 | 0.003951 | 0.011292 | 515 | 515 |
| VPS33B    | -0.12676 | 0.003962 | 0.011319 | 515 | 515 |
| COX8A     | -0.12675 | 0.003964 | 0.011323 | 515 | 515 |
| AMELX     | -0.12672 | 0.003973 | 0.011346 | 515 | 32  |
| SNRPA1    | -0.12669 | 0.003981 | 0.011367 | 515 | 515 |
| UBE2V1    | -0.12667 | 0.003985 | 0.011376 | 515 | 515 |
| CA8       | -0.12666 | 0.003989 | 0.011385 | 515 | 509 |
| DLX2      | -0.12661 | 0.004004 | 0.011423 | 515 | 279 |
| UQCRH     | -0.12661 | 0.004004 | 0.011423 | 515 | 515 |
| IPO5      | -0.12658 | 0.004011 | 0.011441 | 515 | 515 |
| TMEM69    | -0.12655 | 0.004022 | 0.011467 | 515 | 515 |
| SOX2      | -0.12652 | 0.00403  | 0.011484 | 515 | 513 |
| COX6A1    | -0.12649 | 0.004039 | 0.01151  | 515 | 515 |

|           |          |          |          |     |     |
|-----------|----------|----------|----------|-----|-----|
| HSPA5     | -0.12648 | 0.004041 | 0.011512 | 515 | 515 |
| ODF2      | -0.12648 | 0.004043 | 0.011516 | 515 | 515 |
| YIPF2     | -0.12642 | 0.004061 | 0.011563 | 515 | 515 |
| MAD1L1    | -0.12639 | 0.004069 | 0.011581 | 515 | 515 |
| NOS1AP    | -0.12631 | 0.004093 | 0.011648 | 515 | 515 |
| EVX1      | -0.12624 | 0.004112 | 0.011697 | 515 | 95  |
| C1orf97   | -0.12622 | 0.004119 | 0.011718 | 515 | 515 |
| FAM173A   | -0.12621 | 0.004123 | 0.011727 | 515 | 515 |
| EVPLL     | -0.12619 | 0.004127 | 0.011735 | 515 | 502 |
| LYRM4     | -0.12617 | 0.004135 | 0.011757 | 515 | 515 |
| PDXP      | -0.12614 | 0.004142 | 0.011773 | 515 | 515 |
| DDX56     | -0.12614 | 0.004144 | 0.011777 | 515 | 515 |
| IDH1      | -0.12611 | 0.004151 | 0.011797 | 515 | 515 |
| C22orf46  | -0.12611 | 0.004152 | 0.011797 | 515 | 515 |
| RALY      | -0.12609 | 0.004159 | 0.011814 | 515 | 515 |
| PCCB      | -0.12608 | 0.00416  | 0.011816 | 515 | 515 |
| MYST4     | -0.12608 | 0.004161 | 0.011817 | 515 | 515 |
| ZFYVE21   | -0.12591 | 0.004211 | 0.011944 | 515 | 515 |
| BCS1L     | -0.1259  | 0.004215 | 0.011948 | 515 | 515 |
| C14orf53  | -0.12588 | 0.00422  | 0.011961 | 515 | 50  |
| NDUFA7    | -0.12587 | 0.004223 | 0.011969 | 515 | 515 |
| GSK3A     | -0.12572 | 0.004269 | 0.012088 | 515 | 515 |
| THEM4     | -0.12572 | 0.00427  | 0.01209  | 515 | 515 |
| DSCR8     | -0.12572 | 0.004271 | 0.012091 | 515 | 131 |
| ZNF713    | -0.12571 | 0.004274 | 0.012097 | 515 | 515 |
| ALPI      | -0.12569 | 0.004279 | 0.01211  | 515 | 85  |
| TMEM145   | -0.12568 | 0.004282 | 0.012116 | 515 | 492 |
| NEUROD4   | -0.12566 | 0.004288 | 0.012129 | 515 | 44  |
| CSAG2     | -0.12566 | 0.004288 | 0.012129 | 515 | 122 |
| MRFAP1L1  | -0.12564 | 0.004295 | 0.012147 | 515 | 515 |
| SLC12A2   | -0.12563 | 0.004299 | 0.012154 | 515 | 515 |
| PAQR7     | -0.12563 | 0.0043   | 0.012154 | 515 | 515 |
| C11orf35  | -0.12561 | 0.004306 | 0.012169 | 515 | 515 |
| DHX15     | -0.12556 | 0.004319 | 0.012206 | 515 | 515 |
| ZNF514    | -0.12556 | 0.004322 | 0.012211 | 515 | 515 |
| WDR20     | -0.12545 | 0.004353 | 0.012296 | 515 | 515 |
| RBPM5     | -0.12542 | 0.004365 | 0.012326 | 515 | 515 |
| ATP6V1H   | -0.12539 | 0.004375 | 0.01235  | 515 | 515 |
| PIWIL1    | -0.12532 | 0.004395 | 0.012401 | 515 | 284 |
| RPL13AP2C | -0.12531 | 0.004399 | 0.012407 | 515 | 515 |
| UGGT2     | -0.12531 | 0.0044   | 0.012408 | 515 | 515 |
| LTBP3     | -0.1253  | 0.004402 | 0.01241  | 515 | 515 |
| SNUPN     | -0.12529 | 0.004406 | 0.012423 | 515 | 515 |
| SLC25A3   | -0.1252  | 0.004434 | 0.01249  | 515 | 515 |
| WEE1      | -0.12516 | 0.004446 | 0.012522 | 515 | 515 |
| MGC23270  | -0.12514 | 0.004451 | 0.012534 | 515 | 515 |
| FAM22A    | -0.12514 | 0.004453 | 0.012536 | 515 | 515 |
| ILDR1     | -0.12511 | 0.004461 | 0.012556 | 515 | 515 |
| XRCC5     | -0.12511 | 0.004462 | 0.012556 | 515 | 515 |
| NONO      | -0.12511 | 0.004463 | 0.012556 | 515 | 515 |
| LOC100132 | -0.12507 | 0.004474 | 0.012586 | 515 | 515 |
| HDAC1     | -0.12507 | 0.004476 | 0.012588 | 515 | 515 |
| TFG       | -0.12506 | 0.004478 | 0.012592 | 515 | 515 |
| SPPL2B    | -0.12504 | 0.004484 | 0.012606 | 515 | 515 |

|           |          |          |          |     |     |
|-----------|----------|----------|----------|-----|-----|
| ARL3      | -0.12501 | 0.004494 | 0.012628 | 515 | 515 |
| NCOA5     | -0.12499 | 0.004502 | 0.012648 | 515 | 515 |
| CRHR2     | -0.12495 | 0.004514 | 0.01268  | 515 | 370 |
| UCK2      | -0.12492 | 0.004523 | 0.012704 | 515 | 515 |
| ZDHH8P1   | -0.12488 | 0.004535 | 0.012736 | 515 | 509 |
| FKBP9L    | -0.12472 | 0.004588 | 0.012877 | 515 | 515 |
| HOXC11    | -0.1247  | 0.004595 | 0.012895 | 515 | 319 |
| LECT2     | -0.1247  | 0.004596 | 0.012895 | 515 | 27  |
| SAP130    | -0.12469 | 0.0046   | 0.012905 | 515 | 515 |
| ABLIM2    | -0.12464 | 0.004616 | 0.012945 | 515 | 515 |
| PIBF1     | -0.12462 | 0.004621 | 0.012957 | 515 | 515 |
| SIRT4     | -0.12461 | 0.004625 | 0.012966 | 515 | 515 |
| MAGEA10   | -0.1246  | 0.00463  | 0.012976 | 515 | 179 |
| LOC647288 | -0.12459 | 0.004633 | 0.012983 | 515 | 515 |
| KBTBD7    | -0.12456 | 0.00464  | 0.013    | 515 | 515 |
| KIAA0895  | -0.12456 | 0.004643 | 0.013005 | 515 | 515 |
| LOC400752 | -0.12452 | 0.004655 | 0.013035 | 515 | 515 |
| UBE2L3    | -0.12448 | 0.004669 | 0.013067 | 515 | 515 |
| NSUN2     | -0.12442 | 0.004687 | 0.013111 | 515 | 515 |
| LOC388789 | -0.1244  | 0.004697 | 0.013135 | 515 | 515 |
| TAOK2     | -0.12439 | 0.004699 | 0.013138 | 515 | 515 |
| LOC100268 | -0.12439 | 0.0047   | 0.013138 | 515 | 509 |
| APOC3     | -0.12436 | 0.004709 | 0.01316  | 515 | 68  |
| CDC73     | -0.12436 | 0.004709 | 0.01316  | 515 | 515 |
| PCSK2     | -0.1243  | 0.00473  | 0.013211 | 515 | 452 |
| FLJ37453  | -0.12426 | 0.004743 | 0.01324  | 515 | 515 |
| EDEM3     | -0.12425 | 0.004745 | 0.013245 | 515 | 515 |
| ZNF695    | -0.12423 | 0.004751 | 0.01326  | 515 | 507 |
| CAPN1     | -0.12423 | 0.004752 | 0.01326  | 515 | 515 |
| HSPE1     | -0.12419 | 0.004768 | 0.013301 | 515 | 515 |
| PRAF2     | -0.12414 | 0.004784 | 0.013343 | 515 | 515 |
| NOTCH3    | -0.12411 | 0.004792 | 0.013363 | 515 | 515 |
| PCSK4     | -0.12408 | 0.004803 | 0.013391 | 515 | 513 |
| SPIN2B    | -0.12408 | 0.004804 | 0.013391 | 515 | 515 |
| DDX49     | -0.12404 | 0.004817 | 0.01342  | 515 | 515 |
| UQCRHL    | -0.12399 | 0.004836 | 0.013465 | 515 | 515 |
| PBLD      | -0.12396 | 0.004845 | 0.013486 | 515 | 515 |
| LOC442454 | -0.12396 | 0.004845 | 0.013486 | 515 | 515 |
| MTFMT     | -0.12394 | 0.004851 | 0.013502 | 515 | 515 |
| C16orf46  | -0.12393 | 0.004856 | 0.013512 | 515 | 515 |
| SNHG7     | -0.12392 | 0.004861 | 0.01352  | 515 | 515 |
| PTGS2     | -0.12388 | 0.004873 | 0.013554 | 515 | 515 |
| SORL1     | -0.12387 | 0.004877 | 0.013561 | 515 | 515 |
| CASP9     | -0.12368 | 0.004944 | 0.013735 | 515 | 515 |
| UCHL5     | -0.12365 | 0.004952 | 0.013752 | 515 | 515 |
| ZBTB17    | -0.12364 | 0.004959 | 0.013768 | 515 | 515 |
| ASPG      | -0.12359 | 0.004974 | 0.013806 | 515 | 433 |
| CRB3      | -0.12355 | 0.004989 | 0.013843 | 515 | 515 |
| THNSL1    | -0.12353 | 0.004996 | 0.013858 | 515 | 515 |
| CUL3      | -0.12351 | 0.005003 | 0.013874 | 515 | 515 |
| TMEM53    | -0.12349 | 0.00501  | 0.013892 | 515 | 515 |
| CCT5      | -0.1234  | 0.005041 | 0.013967 | 515 | 515 |
| USP28     | -0.1234  | 0.005043 | 0.01397  | 515 | 515 |
| ZNF703    | -0.12334 | 0.005065 | 0.014029 | 515 | 515 |

|           |          |          |          |     |     |
|-----------|----------|----------|----------|-----|-----|
| MAPK6     | -0.12327 | 0.00509  | 0.014093 | 515 | 515 |
| PKN2      | -0.12325 | 0.005095 | 0.014102 | 515 | 515 |
| HEATR7A   | -0.1232  | 0.005114 | 0.014143 | 515 | 515 |
| C7orf47   | -0.12317 | 0.005124 | 0.014169 | 515 | 515 |
| NDUFS6    | -0.12316 | 0.005128 | 0.014178 | 515 | 515 |
| PRKRIP1   | -0.12315 | 0.005134 | 0.014191 | 515 | 515 |
| TTC36     | -0.12313 | 0.005141 | 0.014208 | 515 | 348 |
| SEMA4B    | -0.12312 | 0.005143 | 0.014213 | 515 | 515 |
| ROMO1     | -0.12311 | 0.005149 | 0.014225 | 515 | 515 |
| SFPQ      | -0.12298 | 0.005196 | 0.014348 | 515 | 515 |
| HIST1H2AM | -0.12295 | 0.005207 | 0.014374 | 515 | 501 |
| TOP3A     | -0.12292 | 0.005216 | 0.014393 | 515 | 515 |
| KRTAP5-5  | -0.12292 | 0.005218 | 0.014397 | 515 | 73  |
| ZNF282    | -0.12289 | 0.005229 | 0.014427 | 515 | 515 |
| MAMSTR    | -0.12286 | 0.005238 | 0.01445  | 515 | 515 |
| FAM54B    | -0.12282 | 0.005253 | 0.014489 | 515 | 515 |
| DIP2A     | -0.12282 | 0.005255 | 0.014491 | 515 | 515 |
| CCDC137   | -0.1228  | 0.00526  | 0.014505 | 515 | 515 |
| GLI4      | -0.12275 | 0.005281 | 0.014556 | 515 | 515 |
| PDHB      | -0.12272 | 0.005292 | 0.014582 | 515 | 515 |
| SLC22A18  | -0.12272 | 0.005292 | 0.014582 | 515 | 515 |
| DNAJC14   | -0.12272 | 0.005293 | 0.014582 | 515 | 515 |
| C20orf134 | -0.1227  | 0.005298 | 0.014593 | 515 | 515 |
| NCLN      | -0.12262 | 0.005329 | 0.014673 | 515 | 515 |
| PROZ      | -0.12261 | 0.005334 | 0.014681 | 515 | 420 |
| TCF7L1    | -0.12258 | 0.005343 | 0.014701 | 515 | 515 |
| PQLC2     | -0.12258 | 0.005345 | 0.014705 | 515 | 515 |
| FBXW5     | -0.12251 | 0.005371 | 0.014766 | 515 | 515 |
| SLC25A44  | -0.12246 | 0.005391 | 0.014814 | 515 | 515 |
| DNMT3L    | -0.12246 | 0.005391 | 0.014814 | 515 | 86  |
| ALG6      | -0.12246 | 0.005391 | 0.014814 | 515 | 515 |
| ZBTB22    | -0.12245 | 0.005394 | 0.01482  | 515 | 515 |
| DNAJB11   | -0.12242 | 0.005404 | 0.014842 | 515 | 515 |
| FASTKD5   | -0.12241 | 0.00541  | 0.014857 | 515 | 515 |
| PITRM1    | -0.1224  | 0.005411 | 0.014857 | 515 | 515 |
| OVGP1     | -0.12238 | 0.005418 | 0.014876 | 515 | 515 |
| CTF1      | -0.12232 | 0.005444 | 0.01494  | 515 | 515 |
| KIAA0907  | -0.12228 | 0.005456 | 0.014967 | 515 | 515 |
| APEX1     | -0.12224 | 0.005472 | 0.015008 | 515 | 515 |
| LENG9     | -0.12221 | 0.005484 | 0.015039 | 515 | 515 |
| RRP1      | -0.1222  | 0.005488 | 0.015046 | 515 | 515 |
| TOM1      | -0.1222  | 0.005489 | 0.015047 | 515 | 515 |
| FAM3A     | -0.12216 | 0.005505 | 0.015087 | 515 | 515 |
| SMYD5     | -0.12215 | 0.00551  | 0.015098 | 515 | 515 |
| SFXN2     | -0.12211 | 0.005525 | 0.015132 | 515 | 515 |
| LOC729156 | -0.1221  | 0.005526 | 0.015133 | 515 | 308 |
| TULP1     | -0.12209 | 0.00553  | 0.01514  | 515 | 398 |
| KC6       | -0.12209 | 0.005531 | 0.01514  | 515 | 228 |
| GAGE12J   | -0.12207 | 0.005539 | 0.015158 | 515 | 76  |
| NACAP1    | -0.12206 | 0.005543 | 0.015167 | 515 | 515 |
| PTPN3     | -0.12202 | 0.005557 | 0.015202 | 515 | 515 |
| PPP5C     | -0.12202 | 0.00556  | 0.015207 | 515 | 515 |
| DNAJA3    | -0.12198 | 0.005573 | 0.015239 | 515 | 515 |
| SSB       | -0.12198 | 0.005574 | 0.015239 | 515 | 515 |



|           |          |          |          |     |     |
|-----------|----------|----------|----------|-----|-----|
| STK36     | -0.12198 | 0.005576 | 0.015242 | 515 | 515 |
| PSKH1     | -0.12196 | 0.005582 | 0.015256 | 515 | 515 |
| C20orf135 | -0.12196 | 0.005584 | 0.01526  | 515 | 515 |
| FLJ23867  | -0.12193 | 0.005596 | 0.015287 | 515 | 515 |
| CYP2J2    | -0.12187 | 0.005617 | 0.015341 | 515 | 515 |
| JAGN1     | -0.12186 | 0.005623 | 0.015356 | 515 | 515 |
| C16orf88  | -0.12181 | 0.00564  | 0.015401 | 515 | 515 |
| ESM1      | -0.12178 | 0.005652 | 0.015432 | 515 | 515 |
| LAD1      | -0.12177 | 0.005657 | 0.015443 | 515 | 515 |
| MTERFD3   | -0.12175 | 0.005664 | 0.015456 | 515 | 515 |
| GAGE2B    | -0.12171 | 0.005683 | 0.015502 | 515 | 39  |
| RGSL1     | -0.12169 | 0.005688 | 0.015513 | 515 | 59  |
| DDC       | -0.12168 | 0.005695 | 0.01553  | 515 | 494 |
| PCOTH     | -0.12166 | 0.005703 | 0.015548 | 515 | 510 |
| CLPTM1    | -0.12165 | 0.005705 | 0.01555  | 515 | 515 |
| MUTYH     | -0.12165 | 0.005706 | 0.015551 | 515 | 515 |
| PPM1H     | -0.12162 | 0.005719 | 0.01558  | 515 | 515 |
| KLHL30    | -0.12158 | 0.005733 | 0.015616 | 515 | 510 |
| HIST1H2BK | -0.12153 | 0.005754 | 0.015666 | 515 | 515 |
| SLC44A2   | -0.12149 | 0.005769 | 0.015703 | 515 | 515 |
| FGB       | -0.12149 | 0.00577  | 0.015703 | 515 | 449 |
| THRA      | -0.12148 | 0.005774 | 0.015712 | 515 | 515 |
| IGFBP2    | -0.12141 | 0.005802 | 0.01578  | 515 | 515 |
| ART5      | -0.12141 | 0.005803 | 0.015781 | 515 | 483 |
| MTX2      | -0.1214  | 0.005808 | 0.015792 | 515 | 515 |
| NEIL1     | -0.1213  | 0.005846 | 0.015889 | 515 | 515 |
| DKK4      | -0.1213  | 0.005848 | 0.015892 | 515 | 142 |
| TDRKH     | -0.12126 | 0.005863 | 0.015924 | 515 | 515 |
| SOHLH1    | -0.12125 | 0.005867 | 0.015934 | 515 | 198 |
| KAT2A     | -0.1211  | 0.005928 | 0.016081 | 515 | 515 |
| PMM1      | -0.12109 | 0.005934 | 0.016096 | 515 | 515 |
| KIAA0556  | -0.12108 | 0.005939 | 0.016107 | 515 | 515 |
| ABCC8     | -0.12108 | 0.00594  | 0.016107 | 515 | 414 |
| SF3B14    | -0.12106 | 0.005948 | 0.016122 | 515 | 515 |
| OCEL1     | -0.12101 | 0.005966 | 0.016168 | 515 | 515 |
| C2orf51   | -0.12099 | 0.005974 | 0.016187 | 515 | 121 |
| ATP5D     | -0.12094 | 0.005994 | 0.016239 | 515 | 515 |
| HDAC6     | -0.12094 | 0.005997 | 0.016246 | 515 | 515 |
| NFIA      | -0.12092 | 0.006004 | 0.016262 | 515 | 515 |
| IDE       | -0.12092 | 0.006006 | 0.016264 | 515 | 515 |
| NOC4L     | -0.12091 | 0.006007 | 0.016264 | 515 | 515 |
| POLR2E    | -0.1209  | 0.006013 | 0.01628  | 515 | 515 |
| LAMB2     | -0.12088 | 0.00602  | 0.016296 | 515 | 515 |
| EIF2B5    | -0.12087 | 0.006026 | 0.016307 | 515 | 515 |
| U2AF2     | -0.12086 | 0.006029 | 0.016314 | 515 | 515 |
| AIFM2     | -0.1208  | 0.006057 | 0.016371 | 515 | 515 |
| LEP       | -0.12079 | 0.006057 | 0.016371 | 515 | 429 |
| ETS2      | -0.12077 | 0.006069 | 0.016398 | 515 | 515 |
| ZNF286B   | -0.12076 | 0.00607  | 0.016398 | 515 | 514 |
| MEAF6     | -0.12073 | 0.006084 | 0.016433 | 515 | 515 |
| SDF2      | -0.12072 | 0.006087 | 0.01644  | 515 | 515 |
| DCST2     | -0.12068 | 0.006107 | 0.016487 | 515 | 511 |
| SPINT2    | -0.12066 | 0.006113 | 0.016497 | 515 | 515 |
| SCGB1C1   | -0.12063 | 0.006127 | 0.016532 | 515 | 40  |

|           |          |          |          |     |     |
|-----------|----------|----------|----------|-----|-----|
| PTPRU     | -0.12062 | 0.006133 | 0.016544 | 515 | 515 |
| C14orf167 | -0.1206  | 0.006139 | 0.016559 | 515 | 515 |
| FTHL17    | -0.12058 | 0.006149 | 0.016579 | 515 | 58  |
| CSRNP3    | -0.12052 | 0.006174 | 0.016638 | 515 | 475 |
| CENPBD1   | -0.12049 | 0.006186 | 0.016665 | 515 | 515 |
| MAGEA6    | -0.12049 | 0.006187 | 0.016665 | 515 | 290 |
| TRIM16    | -0.12049 | 0.006188 | 0.016665 | 515 | 515 |
| SF1       | -0.12048 | 0.006192 | 0.016674 | 515 | 515 |
| HOXC12    | -0.12047 | 0.006198 | 0.016682 | 515 | 111 |
| OCIAD1    | -0.12047 | 0.006198 | 0.016682 | 515 | 515 |
| UBE3B     | -0.12045 | 0.006203 | 0.016693 | 515 | 515 |
| CSPG4     | -0.12039 | 0.006231 | 0.016762 | 515 | 515 |
| BCAM      | -0.12038 | 0.006233 | 0.016766 | 515 | 515 |
| ADIPOQ    | -0.12035 | 0.006246 | 0.016796 | 515 | 94  |
| TACR3     | -0.12033 | 0.006257 | 0.016822 | 515 | 127 |
| GON4L     | -0.12031 | 0.006263 | 0.016834 | 515 | 515 |
| MRPS28    | -0.1202  | 0.006315 | 0.016967 | 515 | 515 |
| EPHA7     | -0.12015 | 0.006337 | 0.017017 | 515 | 489 |
| TUBGCP4   | -0.12011 | 0.006354 | 0.017059 | 515 | 515 |
| IFT88     | -0.12009 | 0.006362 | 0.017077 | 515 | 515 |
| NARFL     | -0.12004 | 0.006382 | 0.017126 | 515 | 515 |
| ANO7      | -0.12002 | 0.006392 | 0.017148 | 515 | 515 |
| SVOPL     | -0.11997 | 0.006413 | 0.0172   | 515 | 485 |
| GMCL1L    | -0.11996 | 0.006419 | 0.017211 | 515 | 510 |
| ATXN7L3B  | -0.11996 | 0.00642  | 0.017213 | 515 | 515 |
| HMGB3L1   | -0.11992 | 0.006438 | 0.017258 | 515 | 180 |
| EIF5AL1   | -0.11988 | 0.006456 | 0.017298 | 515 | 515 |
| MUC20     | -0.11976 | 0.006509 | 0.017428 | 515 | 515 |
| C19orf77  | -0.1197  | 0.006535 | 0.017492 | 515 | 489 |
| BET1L     | -0.1197  | 0.006535 | 0.017492 | 515 | 515 |
| KLHDC3    | -0.11969 | 0.006541 | 0.017504 | 515 | 515 |
| LOC728613 | -0.11969 | 0.006542 | 0.017505 | 515 | 515 |
| TMC04     | -0.11966 | 0.006552 | 0.01753  | 515 | 515 |
| JPH1      | -0.11966 | 0.006554 | 0.01753  | 515 | 515 |
| TMBIM6    | -0.11965 | 0.006557 | 0.017536 | 515 | 515 |
| SNHG3-RCC | -0.11957 | 0.006595 | 0.017625 | 515 | 514 |
| TBX10     | -0.11955 | 0.006605 | 0.01765  | 515 | 274 |
| JARID2    | -0.11953 | 0.006615 | 0.017675 | 515 | 515 |
| PTK6      | -0.11947 | 0.006643 | 0.017738 | 515 | 515 |
| CALCB     | -0.11943 | 0.00666  | 0.017774 | 515 | 263 |
| C1orf26   | -0.11942 | 0.006665 | 0.017786 | 515 | 515 |
| DOCK1     | -0.11941 | 0.00667  | 0.017798 | 515 | 515 |
| EFNA2     | -0.1194  | 0.006675 | 0.017806 | 515 | 288 |
| HSD17B7   | -0.11932 | 0.006709 | 0.01789  | 515 | 515 |
| SHMT2     | -0.11926 | 0.006739 | 0.017968 | 515 | 515 |
| TMEM120B  | -0.11923 | 0.006752 | 0.017994 | 515 | 515 |
| TSNARE1   | -0.11921 | 0.00676  | 0.018011 | 515 | 515 |
| DAP       | -0.1192  | 0.006765 | 0.01802  | 515 | 515 |
| SI        | -0.11917 | 0.006778 | 0.01805  | 515 | 55  |
| ULK2      | -0.11917 | 0.006779 | 0.01805  | 515 | 515 |
| SLC35E2   | -0.1191  | 0.00681  | 0.018128 | 515 | 515 |
| ADAD2     | -0.1191  | 0.006814 | 0.018135 | 515 | 349 |
| IGF2      | -0.11906 | 0.006832 | 0.018178 | 515 | 515 |
| RPL13P5   | -0.11905 | 0.006836 | 0.018187 | 515 | 515 |

|           |          |          |          |     |     |
|-----------|----------|----------|----------|-----|-----|
| DDX55     | -0.11902 | 0.006852 | 0.018221 | 515 | 515 |
| FANCF     | -0.119   | 0.006859 | 0.018235 | 515 | 515 |
| MLNR      | -0.119   | 0.00686  | 0.018236 | 515 | 249 |
| SLC2A4RG  | -0.11897 | 0.006875 | 0.018275 | 515 | 515 |
| C3orf35   | -0.11896 | 0.006879 | 0.018282 | 515 | 507 |
| SLC47A2   | -0.11893 | 0.006893 | 0.018314 | 515 | 449 |
| ZNF574    | -0.11891 | 0.006902 | 0.018335 | 515 | 515 |
| SOX15     | -0.11889 | 0.006912 | 0.018359 | 515 | 515 |
| FAM160A2  | -0.11887 | 0.00692  | 0.018378 | 515 | 515 |
| ABHD11    | -0.11884 | 0.006936 | 0.018419 | 515 | 515 |
| LOC100009 | -0.11883 | 0.006938 | 0.018421 | 515 | 515 |
| PAX3      | -0.11883 | 0.006941 | 0.018428 | 515 | 147 |
| CXorf66   | -0.11879 | 0.00696  | 0.018472 | 515 | 5   |
| TMEM45B   | -0.11877 | 0.006969 | 0.018493 | 515 | 515 |
| TIMM16    | -0.11877 | 0.006971 | 0.018496 | 515 | 515 |
| AFARP1    | -0.11876 | 0.006972 | 0.018496 | 515 | 463 |
| C17orf100 | -0.11874 | 0.006986 | 0.018528 | 515 | 515 |
| RPS6KC1   | -0.11871 | 0.006998 | 0.018554 | 515 | 515 |
| FAM100A   | -0.1187  | 0.007001 | 0.018558 | 515 | 515 |
| PEX7      | -0.1187  | 0.007005 | 0.018567 | 515 | 515 |
| TEDDM1    | -0.11869 | 0.007007 | 0.018571 | 515 | 323 |
| HAGH      | -0.11865 | 0.007026 | 0.018617 | 515 | 515 |
| SMAD2     | -0.11859 | 0.007055 | 0.018691 | 515 | 515 |
| TMEM33    | -0.11856 | 0.007072 | 0.018731 | 515 | 515 |
| ZRANB1    | -0.11854 | 0.007081 | 0.018749 | 515 | 515 |
| C19orf23  | -0.11851 | 0.007096 | 0.018786 | 515 | 515 |
| C21orf119 | -0.11849 | 0.007103 | 0.018803 | 515 | 515 |
| ZNF704    | -0.11843 | 0.007131 | 0.018872 | 515 | 515 |
| LRR1Q4    | -0.11841 | 0.007141 | 0.018895 | 515 | 467 |
| TTY15     | -0.11841 | 0.007142 | 0.018895 | 515 | 267 |
| BRD9      | -0.1184  | 0.007149 | 0.018909 | 515 | 515 |
| ALS2      | -0.1184  | 0.007149 | 0.018909 | 515 | 515 |
| MRPL28    | -0.11837 | 0.007161 | 0.018936 | 515 | 515 |
| STX6      | -0.11837 | 0.007161 | 0.018936 | 515 | 515 |
| TMEM186   | -0.11836 | 0.00717  | 0.018956 | 515 | 515 |
| GAGE2A    | -0.11835 | 0.007175 | 0.018967 | 515 | 70  |
| LMTK3     | -0.11826 | 0.007215 | 0.019068 | 515 | 515 |
| LANCL2    | -0.11814 | 0.007279 | 0.019224 | 515 | 515 |
| SLC39A6   | -0.11805 | 0.007321 | 0.019324 | 515 | 515 |
| TJAP1     | -0.11805 | 0.007323 | 0.019327 | 515 | 515 |
| TBX6      | -0.11799 | 0.00735  | 0.01939  | 515 | 515 |
| PRR15L    | -0.11799 | 0.00735  | 0.01939  | 515 | 515 |
| HMG1      | -0.11792 | 0.007385 | 0.019476 | 515 | 515 |
| AGBL4     | -0.11787 | 0.007414 | 0.01954  | 515 | 436 |
| FAM196A   | -0.11786 | 0.007419 | 0.01955  | 515 | 513 |
| PKP1      | -0.11784 | 0.007427 | 0.019567 | 515 | 511 |
| NDUFAF3   | -0.11781 | 0.007442 | 0.019599 | 515 | 515 |
| ZNF609    | -0.11781 | 0.007444 | 0.0196   | 515 | 515 |
| TMEM14A   | -0.1178  | 0.007448 | 0.019607 | 515 | 515 |
| TDRG1     | -0.11778 | 0.007459 | 0.019632 | 515 | 103 |
| HERC2     | -0.11775 | 0.007473 | 0.019667 | 515 | 515 |
| LOC388588 | -0.11775 | 0.007474 | 0.019668 | 515 | 515 |
| TPD52L2   | -0.11774 | 0.007477 | 0.019673 | 515 | 515 |
| ADCK4     | -0.1177  | 0.007497 | 0.01972  | 515 | 515 |

|          |          |          |          |     |     |
|----------|----------|----------|----------|-----|-----|
| POLR3A   | -0.1177  | 0.0075   | 0.019726 | 515 | 515 |
| PAPD5    | -0.11769 | 0.007503 | 0.019727 | 515 | 515 |
| MED29    | -0.11769 | 0.007506 | 0.019732 | 515 | 515 |
| GIF      | -0.11767 | 0.007512 | 0.019747 | 515 | 52  |
| ZFYVE19  | -0.11765 | 0.007524 | 0.019772 | 515 | 515 |
| C2orf14  | -0.11762 | 0.007539 | 0.01981  | 515 | 94  |
| FAM22D   | -0.11759 | 0.007554 | 0.019842 | 515 | 515 |
| KIAA1161 | -0.11756 | 0.007569 | 0.019875 | 515 | 515 |
| TM2D3    | -0.11755 | 0.007576 | 0.019891 | 515 | 515 |
| PLK5P    | -0.11753 | 0.007587 | 0.019911 | 515 | 237 |
| ZG16     | -0.11752 | 0.007589 | 0.019916 | 515 | 271 |
| C10orf4  | -0.11748 | 0.007612 | 0.019971 | 515 | 515 |
| PDIK1L   | -0.11743 | 0.007636 | 0.020028 | 515 | 515 |
| FAHD1    | -0.11743 | 0.007639 | 0.020032 | 515 | 515 |
| KCNQ2    | -0.11742 | 0.007641 | 0.020035 | 515 | 292 |
| RCC2     | -0.11742 | 0.007645 | 0.020043 | 515 | 515 |
| OTOL1    | -0.11741 | 0.00765  | 0.020054 | 515 | 35  |
| CXADRP3  | -0.11739 | 0.007659 | 0.020074 | 515 | 389 |
| GUCA2B   | -0.11734 | 0.007686 | 0.020137 | 515 | 160 |
| MYO1D    | -0.1173  | 0.007707 | 0.020191 | 515 | 515 |
| PITPNM1  | -0.11723 | 0.007741 | 0.020268 | 515 | 515 |
| SAMD12   | -0.11722 | 0.007747 | 0.020276 | 515 | 515 |
| ZC3H18   | -0.11721 | 0.007754 | 0.020291 | 515 | 515 |
| C9orf173 | -0.1172  | 0.007756 | 0.020295 | 515 | 467 |
| POLL     | -0.11718 | 0.00777  | 0.020325 | 515 | 515 |
| EXOC3    | -0.11717 | 0.007774 | 0.020334 | 515 | 515 |
| SEPT12   | -0.11717 | 0.007777 | 0.020338 | 515 | 198 |
| RAB11A   | -0.11714 | 0.007789 | 0.020366 | 515 | 515 |
| FAM200B  | -0.11705 | 0.007836 | 0.020478 | 515 | 515 |
| KDM5D    | -0.11703 | 0.007849 | 0.020504 | 515 | 325 |
| ARMC5    | -0.117   | 0.007866 | 0.020547 | 515 | 515 |
| SEC11A   | -0.11696 | 0.007883 | 0.020582 | 515 | 515 |
| HEATR1   | -0.11694 | 0.007898 | 0.020614 | 515 | 515 |
| DCUN1D2  | -0.11689 | 0.007921 | 0.020673 | 515 | 515 |
| NCK2     | -0.11689 | 0.007923 | 0.020675 | 515 | 515 |
| WDR24    | -0.11677 | 0.007987 | 0.020822 | 515 | 515 |
| NAT15    | -0.11674 | 0.008002 | 0.020859 | 515 | 515 |
| ACP6     | -0.1166  | 0.008079 | 0.021047 | 515 | 515 |
| ACOT8    | -0.11659 | 0.008084 | 0.021059 | 515 | 515 |
| RFWD2    | -0.11658 | 0.00809  | 0.021072 | 515 | 515 |
| INHBC    | -0.11655 | 0.008106 | 0.021109 | 515 | 404 |
| CD55     | -0.11655 | 0.00811  | 0.021114 | 515 | 515 |
| RNF2     | -0.11647 | 0.008153 | 0.021218 | 515 | 515 |
| THOC5    | -0.11646 | 0.008159 | 0.02123  | 515 | 515 |
| ADCY6    | -0.11643 | 0.008175 | 0.021266 | 515 | 515 |
| NKAIN1   | -0.11641 | 0.008187 | 0.021294 | 515 | 494 |
| FAM186B  | -0.11639 | 0.008194 | 0.021307 | 515 | 515 |
| TMEM125  | -0.11636 | 0.008214 | 0.021352 | 515 | 515 |
| NDFIP2   | -0.11635 | 0.00822  | 0.021364 | 515 | 515 |
| MTMR4    | -0.11632 | 0.008237 | 0.021398 | 515 | 515 |
| MAOA     | -0.1163  | 0.008245 | 0.021417 | 515 | 515 |
| MATN4    | -0.11628 | 0.008258 | 0.021449 | 515 | 437 |
| NOP58    | -0.11627 | 0.008263 | 0.021455 | 515 | 515 |
| GPR37L1  | -0.11625 | 0.008276 | 0.021485 | 515 | 492 |

|           |          |          |          |     |     |
|-----------|----------|----------|----------|-----|-----|
| ZNF787    | -0.11624 | 0.008279 | 0.021491 | 515 | 515 |
| WDR26     | -0.11624 | 0.008281 | 0.021495 | 515 | 515 |
| UBTD1     | -0.11623 | 0.008284 | 0.021498 | 515 | 515 |
| FBXL15    | -0.11618 | 0.008314 | 0.021565 | 515 | 515 |
| DAGLA     | -0.11613 | 0.008339 | 0.021626 | 515 | 515 |
| CABLES2   | -0.11612 | 0.008344 | 0.021637 | 515 | 515 |
| C21orf45  | -0.11608 | 0.008372 | 0.021702 | 515 | 515 |
| ZBTB4     | -0.11603 | 0.008396 | 0.021752 | 515 | 515 |
| GALNT4    | -0.11603 | 0.008398 | 0.021754 | 515 | 515 |
| TMSB4Y    | -0.116   | 0.008416 | 0.02179  | 515 | 263 |
| PYCRL     | -0.11598 | 0.008424 | 0.021806 | 515 | 515 |
| SFRS8     | -0.11598 | 0.008425 | 0.021806 | 515 | 515 |
| GGCT      | -0.11597 | 0.008432 | 0.021821 | 515 | 515 |
| CHMP4B    | -0.11596 | 0.008437 | 0.02183  | 515 | 515 |
| GLCE      | -0.11594 | 0.008447 | 0.021849 | 515 | 515 |
| C2orf70   | -0.11587 | 0.008489 | 0.021939 | 515 | 426 |
| NOL12     | -0.11583 | 0.008511 | 0.02199  | 515 | 515 |
| MAGEA9B   | -0.11581 | 0.008523 | 0.022017 | 515 | 230 |
| ZNF668    | -0.11579 | 0.008534 | 0.022041 | 515 | 515 |
| PROC      | -0.11578 | 0.008541 | 0.022056 | 515 | 515 |
| CACNA1D   | -0.1157  | 0.008584 | 0.02216  | 515 | 514 |
| USP9Y     | -0.11567 | 0.008605 | 0.022202 | 515 | 307 |
| LOC150786 | -0.11567 | 0.008605 | 0.022202 | 515 | 515 |
| PHGDH     | -0.11566 | 0.008608 | 0.022206 | 515 | 515 |
| C7orf30   | -0.1156  | 0.008645 | 0.022294 | 515 | 515 |
| WDR73     | -0.11554 | 0.008677 | 0.022362 | 515 | 515 |
| PDIA2     | -0.11554 | 0.008677 | 0.022362 | 515 | 478 |
| GNPNAT1   | -0.11553 | 0.008682 | 0.022373 | 515 | 515 |
| INTS6     | -0.11551 | 0.008695 | 0.022396 | 515 | 515 |
| XRRA1     | -0.11549 | 0.008706 | 0.022422 | 515 | 515 |
| ZNF653    | -0.11549 | 0.008709 | 0.022427 | 515 | 515 |
| TSSC4     | -0.11546 | 0.008729 | 0.022474 | 515 | 515 |
| ZIC4      | -0.11544 | 0.008739 | 0.022496 | 515 | 178 |
| ERI3      | -0.11542 | 0.008749 | 0.022518 | 515 | 515 |
| TMPRSS13  | -0.1154  | 0.00876  | 0.022537 | 515 | 515 |
| HEPACAM2  | -0.11539 | 0.008767 | 0.022553 | 515 | 437 |
| ZCCHC14   | -0.11539 | 0.008769 | 0.022555 | 515 | 515 |
| KLK13     | -0.11536 | 0.008786 | 0.022595 | 515 | 477 |
| SAMD13    | -0.11534 | 0.008796 | 0.022614 | 515 | 514 |
| SFRS1     | -0.11532 | 0.008806 | 0.022635 | 515 | 515 |
| RNPEPL1   | -0.1153  | 0.00882  | 0.022667 | 515 | 515 |
| C12orf47  | -0.1153  | 0.00882  | 0.022667 | 515 | 515 |
| LSS       | -0.11527 | 0.008838 | 0.02271  | 515 | 515 |
| LIN28B    | -0.11526 | 0.008842 | 0.022717 | 515 | 160 |
| PSMC5     | -0.11526 | 0.008846 | 0.022723 | 515 | 515 |
| ESX1      | -0.11524 | 0.008854 | 0.02274  | 515 | 65  |
| CHD8      | -0.1152  | 0.00888  | 0.0228   | 515 | 515 |
| MYL6B     | -0.11518 | 0.008893 | 0.02283  | 515 | 515 |
| RPUSD1    | -0.11515 | 0.008906 | 0.022861 | 515 | 515 |
| FADS2     | -0.11508 | 0.008949 | 0.022964 | 515 | 515 |
| LOC221710 | -0.11507 | 0.008954 | 0.022975 | 515 | 515 |
| FAM98A    | -0.11504 | 0.008973 | 0.023017 | 515 | 515 |
| TM4SF20   | -0.11502 | 0.008987 | 0.023049 | 515 | 249 |
| PIGO      | -0.115   | 0.008999 | 0.023068 | 515 | 515 |

|          |          |          |          |     |     |
|----------|----------|----------|----------|-----|-----|
| MRPS11   | -0.11499 | 0.009003 | 0.023073 | 515 | 515 |
| HTR1B    | -0.11499 | 0.009006 | 0.023078 | 515 | 427 |
| C6orf26  | -0.11497 | 0.009016 | 0.023102 | 515 | 515 |
| NACA     | -0.11495 | 0.009031 | 0.023134 | 515 | 515 |
| ZNF252   | -0.11494 | 0.009033 | 0.023135 | 515 | 515 |
| SLC37A3  | -0.11494 | 0.009038 | 0.023139 | 515 | 515 |
| CCDC86   | -0.11493 | 0.009042 | 0.023144 | 515 | 515 |
| SLC9A2   | -0.11493 | 0.009043 | 0.023144 | 515 | 487 |
| NAT14    | -0.11493 | 0.009043 | 0.023144 | 515 | 515 |
| CXADRP2  | -0.11491 | 0.009055 | 0.023172 | 515 | 339 |
| CRABP1   | -0.11488 | 0.00907  | 0.023203 | 515 | 440 |
| COMTD1   | -0.11488 | 0.009073 | 0.023208 | 515 | 515 |
| RSRC2    | -0.11487 | 0.009075 | 0.023209 | 515 | 515 |
| GREB1    | -0.11487 | 0.009078 | 0.023212 | 515 | 515 |
| AURKAPS1 | -0.11486 | 0.009083 | 0.02322  | 515 | 515 |
| KHDRBS1  | -0.11486 | 0.009084 | 0.02322  | 515 | 515 |
| COG1     | -0.11486 | 0.009085 | 0.02322  | 515 | 515 |
| SLC01A2  | -0.11484 | 0.009094 | 0.023237 | 515 | 396 |
| SSX4     | -0.11479 | 0.009126 | 0.023312 | 515 | 197 |
| EDAR     | -0.11476 | 0.009142 | 0.023344 | 515 | 471 |
| PKDREJ   | -0.11474 | 0.009156 | 0.023371 | 515 | 506 |
| ZNF707   | -0.11465 | 0.00921  | 0.023495 | 515 | 515 |
| MTMR12   | -0.11464 | 0.009219 | 0.023516 | 515 | 515 |
| FGF21    | -0.11463 | 0.009223 | 0.023523 | 515 | 115 |
| C8orf56  | -0.11463 | 0.009225 | 0.023526 | 515 | 330 |
| HADHB    | -0.11459 | 0.009246 | 0.023575 | 515 | 515 |
| VPS25    | -0.11456 | 0.009267 | 0.023623 | 515 | 515 |
| CYB5R2   | -0.11455 | 0.00927  | 0.023629 | 515 | 515 |
| CA6      | -0.11455 | 0.009276 | 0.023641 | 515 | 248 |
| FOXRED2  | -0.11453 | 0.009283 | 0.023655 | 515 | 515 |
| MYBPC1   | -0.11446 | 0.009331 | 0.023774 | 515 | 386 |
| IMMT     | -0.11445 | 0.009338 | 0.023786 | 515 | 515 |
| ACCN2    | -0.11439 | 0.009374 | 0.023871 | 515 | 515 |
| GAGE2C   | -0.11438 | 0.009377 | 0.023873 | 515 | 44  |
| STXBP5L  | -0.11437 | 0.009388 | 0.023898 | 515 | 313 |
| DDX42    | -0.11435 | 0.009396 | 0.023913 | 515 | 515 |
| USMG5    | -0.11434 | 0.009404 | 0.023929 | 515 | 515 |
| PRPSAP2  | -0.11433 | 0.00941  | 0.023941 | 515 | 515 |
| EFCAB2   | -0.11431 | 0.009423 | 0.023968 | 515 | 515 |
| MUCL1    | -0.1143  | 0.00943  | 0.023983 | 515 | 340 |
| MED13L   | -0.11428 | 0.009439 | 0.024003 | 515 | 515 |
| SETD1B   | -0.11426 | 0.009456 | 0.02404  | 515 | 515 |
| PWP2     | -0.11426 | 0.009457 | 0.02404  | 515 | 515 |
| TRMT2A   | -0.11425 | 0.009462 | 0.024049 | 515 | 515 |
| HES1     | -0.1142  | 0.00949  | 0.024116 | 515 | 515 |
| ROGDI    | -0.11418 | 0.009503 | 0.024146 | 515 | 515 |
| CDK11A   | -0.11418 | 0.009506 | 0.024149 | 515 | 515 |
| RALBP1   | -0.11417 | 0.009511 | 0.024159 | 515 | 515 |
| EXOSC6   | -0.11413 | 0.009536 | 0.024214 | 515 | 515 |
| FAM13A   | -0.11409 | 0.009563 | 0.024277 | 515 | 515 |
| BRPF3    | -0.11406 | 0.009581 | 0.024321 | 515 | 515 |
| GPR137   | -0.11406 | 0.009583 | 0.024324 | 515 | 515 |
| DVL3     | -0.11397 | 0.009636 | 0.024451 | 515 | 515 |
| CDRT4    | -0.11395 | 0.009653 | 0.024488 | 515 | 515 |

|           |          |          |          |     |     |
|-----------|----------|----------|----------|-----|-----|
| JMJD4     | -0.11392 | 0.009673 | 0.024535 | 515 | 515 |
| ZSCAN20   | -0.11391 | 0.009674 | 0.024535 | 515 | 515 |
| PIN4      | -0.1139  | 0.009686 | 0.024562 | 515 | 515 |
| CYorf15B  | -0.11386 | 0.009707 | 0.024603 | 515 | 273 |
| DDX59     | -0.11386 | 0.009707 | 0.024603 | 515 | 515 |
| ARFGAP2   | -0.11386 | 0.00971  | 0.024608 | 515 | 515 |
| RPS4Y1    | -0.11384 | 0.009719 | 0.024629 | 515 | 379 |
| TSEN2     | -0.11383 | 0.00973  | 0.024651 | 515 | 515 |
| KCNE2     | -0.11383 | 0.009731 | 0.024651 | 515 | 511 |
| ZNF142    | -0.1138  | 0.009745 | 0.024675 | 515 | 515 |
| LRRC14    | -0.11379 | 0.009754 | 0.024691 | 515 | 515 |
| CC2D1A    | -0.11376 | 0.009772 | 0.024727 | 515 | 515 |
| CARTPT    | -0.11372 | 0.009798 | 0.024786 | 515 | 49  |
| ALLC      | -0.11372 | 0.009798 | 0.024786 | 515 | 97  |
| PRMT5     | -0.11372 | 0.0098   | 0.024789 | 515 | 515 |
| C10orf82  | -0.11372 | 0.009801 | 0.024789 | 515 | 262 |
| PANX3     | -0.11371 | 0.009809 | 0.024806 | 515 | 112 |
| C18orf56  | -0.11369 | 0.009819 | 0.024827 | 515 | 515 |
| DCAF16    | -0.11362 | 0.009864 | 0.024939 | 515 | 515 |
| HNRNPR    | -0.11361 | 0.009873 | 0.024959 | 515 | 515 |
| C1orf180  | -0.11359 | 0.009881 | 0.024976 | 515 | 152 |
| ERCC3     | -0.11356 | 0.009903 | 0.025023 | 515 | 515 |
| LOC90784  | -0.11356 | 0.009904 | 0.025023 | 515 | 515 |
| RSAD1     | -0.11354 | 0.009916 | 0.02505  | 515 | 515 |
| PHF3      | -0.11354 | 0.009918 | 0.025053 | 515 | 515 |
| PHB2      | -0.11351 | 0.009938 | 0.025096 | 515 | 515 |
| ACTR5     | -0.11348 | 0.009958 | 0.025138 | 515 | 515 |
| ASB6      | -0.11346 | 0.009971 | 0.025165 | 515 | 515 |
| HIST1H2BE | -0.11341 | 0.01     | 0.025233 | 515 | 513 |
| AVPI1     | -0.11341 | 0.010001 | 0.025233 | 515 | 515 |
| TSEN54    | -0.11339 | 0.010014 | 0.025256 | 515 | 515 |
| NCDN      | -0.11338 | 0.01002  | 0.025269 | 515 | 515 |
| TIMM17A   | -0.11332 | 0.010059 | 0.025358 | 515 | 515 |
| PHF20L1   | -0.11329 | 0.010084 | 0.025413 | 515 | 515 |
| ZNHIT2    | -0.11328 | 0.010087 | 0.025418 | 515 | 475 |
| NDUFB10   | -0.11322 | 0.010129 | 0.025519 | 515 | 515 |
| EP300     | -0.11322 | 0.010132 | 0.025521 | 515 | 515 |
| DGCR6     | -0.11318 | 0.010156 | 0.025567 | 515 | 515 |
| SERBP1    | -0.11309 | 0.010217 | 0.02571  | 515 | 515 |
| NAPRT1    | -0.11309 | 0.010219 | 0.025713 | 515 | 515 |
| NCRNA0016 | -0.11308 | 0.010221 | 0.025715 | 515 | 420 |
| SUCLG2    | -0.11307 | 0.010231 | 0.025735 | 515 | 515 |
| COG4      | -0.11301 | 0.010272 | 0.025828 | 515 | 515 |
| GPR148    | -0.11298 | 0.01029  | 0.025867 | 515 | 37  |
| NFXL1     | -0.11294 | 0.010319 | 0.025934 | 515 | 515 |
| DOCK5     | -0.11293 | 0.010324 | 0.025943 | 515 | 515 |
| SYCE1L    | -0.11293 | 0.010325 | 0.025943 | 515 | 508 |
| SSX8      | -0.11289 | 0.010349 | 0.02599  | 515 | 43  |
| TBR1      | -0.11285 | 0.010377 | 0.026054 | 515 | 195 |
| GK5       | -0.11282 | 0.010401 | 0.026108 | 515 | 515 |
| FREM2     | -0.11278 | 0.01043  | 0.026164 | 515 | 513 |
| CHCHD5    | -0.11277 | 0.010434 | 0.026171 | 515 | 515 |
| EPS15L1   | -0.11276 | 0.01044  | 0.026182 | 515 | 515 |
| GSTO2     | -0.11272 | 0.010465 | 0.026238 | 515 | 515 |

|           |          |          |          |     |     |
|-----------|----------|----------|----------|-----|-----|
| CACYBP    | -0.11269 | 0.010486 | 0.026289 | 515 | 515 |
| FOXI3     | -0.11267 | 0.010504 | 0.026328 | 515 | 351 |
| PALM2     | -0.11262 | 0.01054  | 0.026401 | 515 | 515 |
| C12orf44  | -0.1126  | 0.010553 | 0.026425 | 515 | 515 |
| IMP3      | -0.1126  | 0.010554 | 0.026425 | 515 | 515 |
| GNG3      | -0.11258 | 0.010564 | 0.026446 | 515 | 497 |
| DPCD      | -0.11256 | 0.010576 | 0.026473 | 515 | 515 |
| GTF2I     | -0.11252 | 0.010603 | 0.026532 | 515 | 515 |
| GDPD3     | -0.11252 | 0.010609 | 0.026544 | 515 | 515 |
| NPC1L1    | -0.1125  | 0.010618 | 0.026561 | 515 | 501 |
| TNNI1     | -0.1125  | 0.010624 | 0.026573 | 515 | 513 |
| DET1      | -0.11245 | 0.010656 | 0.026651 | 515 | 515 |
| PSMG4     | -0.11242 | 0.010677 | 0.026693 | 515 | 515 |
| NIPBL     | -0.1124  | 0.010693 | 0.026727 | 515 | 515 |
| GRID2     | -0.11235 | 0.010727 | 0.026808 | 515 | 113 |
| EIF4A1    | -0.1123  | 0.010761 | 0.02688  | 515 | 515 |
| HSD17B10  | -0.11225 | 0.010795 | 0.026954 | 515 | 515 |
| SF4       | -0.11225 | 0.010797 | 0.026956 | 515 | 515 |
| SRCAP     | -0.11224 | 0.010805 | 0.02697  | 515 | 515 |
| ZNF202    | -0.11215 | 0.010865 | 0.027103 | 515 | 515 |
| DIABLO    | -0.11215 | 0.010868 | 0.027107 | 515 | 515 |
| DULLARD   | -0.11214 | 0.010872 | 0.027114 | 515 | 515 |
| CLASP1    | -0.11213 | 0.010885 | 0.027141 | 515 | 515 |
| CRNKL1    | -0.11209 | 0.010913 | 0.027198 | 515 | 515 |
| VPS53     | -0.11208 | 0.010914 | 0.027198 | 515 | 515 |
| RTBDN     | -0.11207 | 0.010925 | 0.027218 | 515 | 413 |
| FAM75A6   | -0.11206 | 0.010933 | 0.027234 | 515 | 15  |
| PCCA      | -0.11204 | 0.010945 | 0.02726  | 515 | 515 |
| SLC4A3    | -0.11204 | 0.010948 | 0.027264 | 515 | 515 |
| SIGMAR1   | -0.11202 | 0.010959 | 0.027286 | 515 | 515 |
| RGS9BP    | -0.112   | 0.010973 | 0.02731  | 515 | 504 |
| NSUN7     | -0.11198 | 0.010988 | 0.02734  | 515 | 515 |
| ZNF34     | -0.11197 | 0.010995 | 0.027356 | 515 | 515 |
| LOC100130 | -0.11197 | 0.010998 | 0.027357 | 515 | 515 |
| C2orf47   | -0.11197 | 0.010998 | 0.027357 | 515 | 515 |
| UBXN1     | -0.11195 | 0.011013 | 0.02739  | 515 | 515 |
| MLYCD     | -0.1119  | 0.011048 | 0.027466 | 515 | 515 |
| MOAP1     | -0.11187 | 0.01107  | 0.027514 | 515 | 515 |
| DHX38     | -0.11186 | 0.011077 | 0.027525 | 515 | 515 |
| C1orf115  | -0.1118  | 0.011119 | 0.027611 | 515 | 515 |
| MGA       | -0.1118  | 0.011119 | 0.027611 | 515 | 515 |
| FASTK     | -0.11175 | 0.011157 | 0.027698 | 515 | 515 |
| DDX3Y     | -0.11172 | 0.011175 | 0.027736 | 515 | 354 |
| METTL13   | -0.11172 | 0.011177 | 0.027738 | 515 | 515 |
| RPL8      | -0.11172 | 0.01118  | 0.027742 | 515 | 515 |
| C20orf20  | -0.11171 | 0.011183 | 0.027747 | 515 | 515 |
| ZAR1      | -0.11163 | 0.011242 | 0.027884 | 515 | 162 |
| EGLN1     | -0.11163 | 0.011244 | 0.027885 | 515 | 515 |
| FGFR3     | -0.11156 | 0.011297 | 0.027999 | 515 | 515 |
| SLC26A6   | -0.11154 | 0.011307 | 0.028016 | 515 | 515 |
| C1orf74   | -0.11149 | 0.011348 | 0.028104 | 515 | 515 |
| LOC284009 | -0.11141 | 0.011406 | 0.028234 | 515 | 359 |
| POLM      | -0.11141 | 0.011406 | 0.028234 | 515 | 515 |
| SRPR      | -0.11141 | 0.011408 | 0.028234 | 515 | 515 |



|           |          |          |          |     |     |
|-----------|----------|----------|----------|-----|-----|
| NDUFB8    | -0.11138 | 0.011425 | 0.02827  | 515 | 515 |
| LOC100240 | -0.11138 | 0.011429 | 0.028274 | 515 | 247 |
| MYPOP     | -0.11134 | 0.011459 | 0.02834  | 515 | 515 |
| TMED6     | -0.11132 | 0.01147  | 0.028361 | 515 | 512 |
| C6orf27   | -0.11132 | 0.011473 | 0.028364 | 515 | 515 |
| TRIOBP    | -0.1113  | 0.011491 | 0.028397 | 515 | 515 |
| GLS2      | -0.11129 | 0.011496 | 0.028404 | 515 | 514 |
| LOC100133 | -0.11125 | 0.011523 | 0.028462 | 515 | 515 |
| SLC38A3   | -0.11122 | 0.011546 | 0.028513 | 515 | 471 |
| DDX10     | -0.11121 | 0.011552 | 0.028521 | 515 | 515 |
| TRIT1     | -0.11121 | 0.011556 | 0.028527 | 515 | 515 |
| GPS1      | -0.11116 | 0.011595 | 0.028609 | 515 | 515 |
| MSI1      | -0.11114 | 0.011606 | 0.028632 | 515 | 510 |
| RALGAPA2  | -0.11114 | 0.011608 | 0.028633 | 515 | 515 |
| ANKS3     | -0.11112 | 0.01162  | 0.028658 | 515 | 515 |
| ZMAT4     | -0.11111 | 0.01163  | 0.028676 | 515 | 360 |
| AQP11     | -0.11111 | 0.011632 | 0.028679 | 515 | 515 |
| CHCHD10   | -0.11107 | 0.011659 | 0.028739 | 515 | 515 |
| ZNF804B   | -0.11105 | 0.011672 | 0.028764 | 515 | 54  |
| NCOR2     | -0.11103 | 0.01169  | 0.028804 | 515 | 515 |
| PTGES2    | -0.11103 | 0.011691 | 0.028804 | 515 | 515 |
| LOC100134 | -0.11102 | 0.011701 | 0.028821 | 515 | 508 |
| OTUB1     | -0.11101 | 0.011703 | 0.028823 | 515 | 515 |
| MS4A13    | -0.111   | 0.011715 | 0.028848 | 515 | 17  |
| AP3D1     | -0.11099 | 0.011717 | 0.028848 | 515 | 515 |
| CHRNB1    | -0.11099 | 0.011718 | 0.028848 | 515 | 515 |
| PARP16    | -0.11096 | 0.011741 | 0.028902 | 515 | 515 |
| NEO1      | -0.11094 | 0.011762 | 0.028945 | 515 | 515 |
| LOC442459 | -0.11093 | 0.011769 | 0.028956 | 515 | 447 |
| RCE1      | -0.11093 | 0.011769 | 0.028956 | 515 | 515 |
| ZNF343    | -0.11092 | 0.011774 | 0.028965 | 515 | 515 |
| CDIPT     | -0.11087 | 0.011814 | 0.029056 | 515 | 515 |
| LOC729082 | -0.11084 | 0.011834 | 0.029101 | 515 | 515 |
| HIST1H2BC | -0.11083 | 0.011845 | 0.029125 | 515 | 441 |
| MCM3      | -0.11081 | 0.011857 | 0.029152 | 515 | 515 |
| WDR59     | -0.11081 | 0.011859 | 0.029153 | 515 | 515 |
| RHPN2     | -0.11079 | 0.011877 | 0.029192 | 515 | 515 |
| ATP11A    | -0.11078 | 0.01188  | 0.029194 | 515 | 515 |
| C20orf96  | -0.11078 | 0.011882 | 0.029195 | 515 | 515 |
| SSTR5     | -0.11078 | 0.011884 | 0.029195 | 515 | 215 |
| RNF103    | -0.11075 | 0.011909 | 0.029242 | 515 | 515 |
| HIST2H3C  | -0.11069 | 0.011951 | 0.029324 | 515 | 488 |
| AP1G1     | -0.11067 | 0.011967 | 0.029355 | 515 | 515 |
| SELENBP1  | -0.11064 | 0.01199  | 0.029403 | 515 | 515 |
| EIF1AY    | -0.11064 | 0.011992 | 0.029404 | 515 | 277 |
| RSL1D1    | -0.11063 | 0.011997 | 0.029413 | 515 | 515 |
| LOC653113 | -0.11063 | 0.012    | 0.029415 | 515 | 515 |
| EEF1G     | -0.11056 | 0.012052 | 0.029529 | 515 | 515 |
| MIPEP     | -0.11053 | 0.012077 | 0.029584 | 515 | 515 |
| ZFAT      | -0.11051 | 0.012094 | 0.029618 | 515 | 515 |
| C6orf126  | -0.11047 | 0.012123 | 0.029681 | 515 | 389 |
| LOC401052 | -0.11041 | 0.012168 | 0.029784 | 515 | 515 |
| SENP8     | -0.11041 | 0.012168 | 0.029784 | 515 | 515 |
| TSPO2     | -0.11037 | 0.012198 | 0.029854 | 515 | 397 |

|           |          |          |          |     |     |
|-----------|----------|----------|----------|-----|-----|
| FBXW9     | -0.11035 | 0.012216 | 0.029893 | 515 | 515 |
| EML2      | -0.11035 | 0.012219 | 0.029894 | 515 | 515 |
| RHOA      | -0.11034 | 0.012223 | 0.0299   | 515 | 515 |
| ZMPSTE24  | -0.11034 | 0.012226 | 0.029901 | 515 | 515 |
| CBX1      | -0.11032 | 0.012237 | 0.029923 | 515 | 515 |
| LGALS7    | -0.11032 | 0.012238 | 0.029923 | 515 | 455 |
| PIGQ      | -0.11031 | 0.012249 | 0.029945 | 515 | 515 |
| N6AMT2    | -0.1103  | 0.012256 | 0.029958 | 515 | 515 |
| FAM200A   | -0.11029 | 0.012262 | 0.02997  | 515 | 515 |
| DMRTC2    | -0.11027 | 0.012282 | 0.030015 | 515 | 192 |
| SFRS2B    | -0.11026 | 0.012286 | 0.030022 | 515 | 515 |
| GAGE2D    | -0.11022 | 0.012323 | 0.0301   | 515 | 80  |
| SEMA6C    | -0.1102  | 0.012332 | 0.03012  | 515 | 515 |
| SRP14     | -0.1101  | 0.012413 | 0.030312 | 515 | 515 |
| LGSN      | -0.1101  | 0.012416 | 0.030313 | 515 | 504 |
| ATAD2B    | -0.11007 | 0.012436 | 0.030352 | 515 | 515 |
| PAFAH2    | -0.11007 | 0.012437 | 0.030352 | 515 | 515 |
| MSH5      | -0.11007 | 0.012439 | 0.030352 | 515 | 515 |
| LEFTY1    | -0.11005 | 0.012455 | 0.030378 | 515 | 504 |
| NDUFC1    | -0.10994 | 0.012548 | 0.030591 | 515 | 515 |
| HIST3H2A  | -0.10991 | 0.012569 | 0.030631 | 515 | 505 |
| HIST1H2AC | -0.10989 | 0.012589 | 0.030671 | 515 | 515 |
| CABIN1    | -0.10987 | 0.012599 | 0.030691 | 515 | 515 |
| SNTA1     | -0.10983 | 0.01263  | 0.030764 | 515 | 515 |
| POU4F1    | -0.10979 | 0.012669 | 0.030844 | 515 | 424 |
| AMACR     | -0.10973 | 0.012717 | 0.030951 | 515 | 515 |
| TIMM44    | -0.10972 | 0.012725 | 0.030961 | 515 | 515 |
| BRF2      | -0.10966 | 0.012774 | 0.031069 | 515 | 515 |
| C8orf74   | -0.10964 | 0.012788 | 0.031092 | 515 | 59  |
| AKR1C1    | -0.10964 | 0.012792 | 0.031097 | 515 | 515 |
| FLJ39582  | -0.10963 | 0.012796 | 0.031104 | 515 | 515 |
| FBXW8     | -0.10963 | 0.012798 | 0.031104 | 515 | 515 |
| ANKRD42   | -0.10961 | 0.012815 | 0.031142 | 515 | 515 |
| UNK       | -0.10961 | 0.012817 | 0.031143 | 515 | 515 |
| KRT10     | -0.10956 | 0.012853 | 0.03122  | 515 | 515 |
| WFDC5     | -0.1095  | 0.012904 | 0.03131  | 515 | 236 |
| NME3      | -0.10949 | 0.012916 | 0.031331 | 515 | 515 |
| ZNF33A    | -0.10947 | 0.012932 | 0.031359 | 515 | 515 |
| BAIAP3    | -0.10946 | 0.012937 | 0.03136  | 515 | 515 |
| B3GAT3    | -0.10946 | 0.012937 | 0.03136  | 515 | 515 |
| TMEM8B    | -0.10946 | 0.012938 | 0.03136  | 515 | 515 |
| GBF1      | -0.10944 | 0.01295  | 0.031387 | 515 | 515 |
| PTPN20A   | -0.10941 | 0.012981 | 0.031455 | 515 | 28  |
| C22orf32  | -0.1094  | 0.012984 | 0.031455 | 515 | 515 |
| MAGEA12   | -0.10938 | 0.013005 | 0.031486 | 515 | 282 |
| HIF3A     | -0.10934 | 0.013038 | 0.031561 | 515 | 515 |
| LOC100271 | -0.10931 | 0.013061 | 0.031606 | 515 | 485 |
| ALCAM     | -0.10929 | 0.013079 | 0.031633 | 515 | 515 |
| PIWIL3    | -0.10928 | 0.013091 | 0.031659 | 515 | 139 |
| PDCD7     | -0.10919 | 0.01316  | 0.031813 | 515 | 515 |
| METTL12   | -0.10919 | 0.013166 | 0.031821 | 515 | 515 |
| LOC440905 | -0.10906 | 0.013272 | 0.032067 | 515 | 462 |
| TRMT61B   | -0.10906 | 0.013275 | 0.032069 | 515 | 515 |
| XRCC1     | -0.10905 | 0.013281 | 0.032076 | 515 | 515 |

|           |          |          |          |     |     |
|-----------|----------|----------|----------|-----|-----|
| DCLRE1A   | -0.10904 | 0.01329  | 0.032093 | 515 | 515 |
| ELMO3     | -0.10895 | 0.013367 | 0.03226  | 515 | 515 |
| ANKRD5    | -0.10894 | 0.01338  | 0.032283 | 515 | 515 |
| KLHL1     | -0.10892 | 0.013391 | 0.032306 | 515 | 39  |
| GGA1      | -0.10892 | 0.013395 | 0.032312 | 515 | 515 |
| GPKOW     | -0.10892 | 0.013396 | 0.032312 | 515 | 515 |
| MAD2L1BP  | -0.10888 | 0.013425 | 0.032377 | 515 | 515 |
| C8orf47   | -0.10884 | 0.013463 | 0.032457 | 515 | 507 |
| APRT      | -0.10881 | 0.013491 | 0.032509 | 515 | 515 |
| MMS19     | -0.10878 | 0.013517 | 0.032564 | 515 | 515 |
| BCDIN3D   | -0.10878 | 0.013517 | 0.032564 | 515 | 515 |
| CHAC1     | -0.10876 | 0.01353  | 0.032588 | 515 | 515 |
| DNAJC3    | -0.10872 | 0.013563 | 0.032655 | 515 | 515 |
| LOC648691 | -0.10872 | 0.013565 | 0.032655 | 515 | 186 |
| UPK2      | -0.10868 | 0.013599 | 0.032732 | 515 | 470 |
| TMX2      | -0.10867 | 0.013604 | 0.032742 | 515 | 515 |
| C5orf51   | -0.10867 | 0.013608 | 0.032747 | 515 | 515 |
| RPLP1     | -0.10863 | 0.013643 | 0.032815 | 515 | 515 |
| OR8B4     | -0.10859 | 0.013675 | 0.032885 | 515 | 5   |
| TFF3      | -0.10855 | 0.013713 | 0.032965 | 515 | 515 |
| APOA1     | -0.1085  | 0.013757 | 0.033066 | 515 | 479 |
| NCRNA0011 | -0.10844 | 0.013813 | 0.033188 | 515 | 515 |
| MRPS25    | -0.10843 | 0.013816 | 0.033189 | 515 | 515 |
| FLJ45445  | -0.1084  | 0.013844 | 0.033251 | 515 | 515 |
| OAZ3      | -0.10839 | 0.013857 | 0.033279 | 515 | 515 |
| FOXA1     | -0.10838 | 0.013862 | 0.033282 | 515 | 515 |
| BCAP31    | -0.10836 | 0.013883 | 0.033321 | 515 | 515 |
| FOXO4     | -0.10832 | 0.013913 | 0.033379 | 515 | 515 |
| COX5B     | -0.10826 | 0.013968 | 0.033495 | 515 | 515 |
| FUZ       | -0.10826 | 0.013972 | 0.033501 | 515 | 515 |
| PBOV1     | -0.10825 | 0.013981 | 0.033512 | 515 | 231 |
| TAB1      | -0.10822 | 0.014008 | 0.033571 | 515 | 515 |
| FAM173B   | -0.1082  | 0.014018 | 0.033593 | 515 | 515 |
| BANF2     | -0.10818 | 0.014043 | 0.033645 | 515 | 83  |
| FECH      | -0.10811 | 0.014101 | 0.033772 | 515 | 515 |
| TXN2      | -0.10806 | 0.014146 | 0.03387  | 515 | 515 |
| KRTAP13-2 | -0.10804 | 0.014169 | 0.033922 | 515 | 57  |
| HPX       | -0.10803 | 0.014175 | 0.033927 | 515 | 514 |
| NENF      | -0.108   | 0.014205 | 0.033991 | 515 | 515 |
| LOC440563 | -0.10799 | 0.014212 | 0.034003 | 515 | 386 |
| HIST1H3J  | -0.10797 | 0.014225 | 0.034023 | 515 | 352 |
| VCP       | -0.10797 | 0.014225 | 0.034023 | 515 | 515 |
| RAPGEF3   | -0.10795 | 0.014243 | 0.034061 | 515 | 515 |
| PRAMEF2   | -0.10792 | 0.014278 | 0.034141 | 515 | 36  |
| CBY1      | -0.10789 | 0.014298 | 0.034184 | 515 | 515 |
| ZSCAN21   | -0.10786 | 0.014324 | 0.034234 | 515 | 515 |
| RPUSD4    | -0.10784 | 0.014342 | 0.034269 | 515 | 515 |
| CEACAM16  | -0.10779 | 0.014394 | 0.034371 | 515 | 223 |
| WIZ       | -0.10772 | 0.014459 | 0.034517 | 515 | 515 |
| FOXH1     | -0.10768 | 0.014489 | 0.03458  | 515 | 491 |
| C10orf88  | -0.10766 | 0.014508 | 0.034622 | 515 | 515 |
| KCNG2     | -0.10756 | 0.014603 | 0.034824 | 515 | 491 |
| RUVBL2    | -0.10755 | 0.014609 | 0.034834 | 515 | 515 |
| RBMY1B    | -0.10753 | 0.014634 | 0.034887 | 515 | 8   |

|           |          |          |          |     |     |
|-----------|----------|----------|----------|-----|-----|
| C11orf84  | -0.10751 | 0.014646 | 0.034909 | 515 | 515 |
| MAVS      | -0.10744 | 0.014715 | 0.035064 | 515 | 515 |
| RBM8A     | -0.10743 | 0.01472  | 0.035071 | 515 | 515 |
| EXOSC10   | -0.10737 | 0.014781 | 0.035204 | 515 | 515 |
| WDR77     | -0.10734 | 0.014805 | 0.035238 | 515 | 515 |
| TMED10P1  | -0.10729 | 0.01485  | 0.035335 | 515 | 515 |
| DPH2      | -0.10727 | 0.014874 | 0.035383 | 515 | 515 |
| TTY4C     | -0.10724 | 0.014903 | 0.035444 | 515 | 47  |
| HAPLN1    | -0.10722 | 0.014916 | 0.035469 | 515 | 501 |
| NEB       | -0.10722 | 0.014916 | 0.035469 | 515 | 515 |
| CHD1L     | -0.10717 | 0.014964 | 0.035562 | 515 | 515 |
| PHYH      | -0.1071  | 0.01503  | 0.035697 | 515 | 515 |
| BAT2L2    | -0.10708 | 0.015053 | 0.035738 | 515 | 515 |
| NMU       | -0.10705 | 0.015077 | 0.03579  | 515 | 487 |
| CPSF7     | -0.10705 | 0.01508  | 0.035794 | 515 | 515 |
| URGCP     | -0.10703 | 0.015101 | 0.035836 | 515 | 515 |
| GAGE4     | -0.10699 | 0.015139 | 0.035913 | 515 | 100 |
| ZC3H4     | -0.10697 | 0.015158 | 0.035945 | 515 | 515 |
| C22orf30  | -0.10695 | 0.015174 | 0.035977 | 515 | 515 |
| SC65      | -0.10694 | 0.015188 | 0.036008 | 515 | 515 |
| UPK1B     | -0.10692 | 0.015207 | 0.036043 | 515 | 388 |
| SP5       | -0.10692 | 0.015208 | 0.036043 | 515 | 513 |
| GPD2      | -0.10689 | 0.015234 | 0.0361   | 515 | 515 |
| CNNM2     | -0.10688 | 0.015241 | 0.036111 | 515 | 515 |
| CHST10    | -0.10688 | 0.015248 | 0.036119 | 515 | 515 |
| C15orf44  | -0.10685 | 0.015275 | 0.036179 | 515 | 515 |
| GNG5      | -0.10683 | 0.015292 | 0.036215 | 515 | 515 |
| CECR2     | -0.10678 | 0.015342 | 0.036322 | 515 | 514 |
| SEC13     | -0.10677 | 0.015353 | 0.036337 | 515 | 515 |
| EIF3I     | -0.10675 | 0.015366 | 0.03636  | 515 | 515 |
| LOC285359 | -0.10674 | 0.015379 | 0.036383 | 515 | 515 |
| RPIA      | -0.1067  | 0.015419 | 0.03646  | 515 | 515 |
| ZNF672    | -0.10669 | 0.015424 | 0.036464 | 515 | 515 |
| PA2G4P4   | -0.10668 | 0.015436 | 0.036485 | 515 | 515 |
| GAN       | -0.10665 | 0.015465 | 0.036546 | 515 | 515 |
| TXNDC12   | -0.1066  | 0.015509 | 0.036638 | 515 | 515 |
| RAB1A     | -0.10659 | 0.015523 | 0.036666 | 515 | 515 |
| C6orf108  | -0.10658 | 0.015537 | 0.036686 | 515 | 515 |
| LOC222699 | -0.10658 | 0.015537 | 0.036686 | 515 | 515 |
| KANK1     | -0.10657 | 0.015544 | 0.036698 | 515 | 515 |
| MLPH      | -0.10655 | 0.01556  | 0.036729 | 515 | 515 |
| CNFN      | -0.10653 | 0.015577 | 0.036755 | 515 | 515 |
| SCN4A     | -0.10643 | 0.015676 | 0.036962 | 515 | 502 |
| C19orf48  | -0.10641 | 0.015699 | 0.037012 | 515 | 515 |
| LOC152024 | -0.10641 | 0.015703 | 0.037017 | 515 | 255 |
| MRPL21    | -0.10638 | 0.015734 | 0.037082 | 515 | 515 |
| TMED2     | -0.10637 | 0.015739 | 0.037088 | 515 | 515 |
| PLCXD1    | -0.10636 | 0.015747 | 0.037103 | 515 | 515 |
| MTMR7     | -0.10635 | 0.015762 | 0.037129 | 515 | 515 |
| FLJ42627  | -0.10632 | 0.015787 | 0.037184 | 515 | 515 |
| RPL37A    | -0.10632 | 0.015792 | 0.037193 | 515 | 515 |
| ANKRD52   | -0.10631 | 0.015796 | 0.037197 | 515 | 515 |
| MSLN      | -0.1063  | 0.015811 | 0.037229 | 515 | 513 |
| DERL2     | -0.10629 | 0.015818 | 0.037241 | 515 | 515 |

|           |          |          |          |     |     |
|-----------|----------|----------|----------|-----|-----|
| ARMCX5    | -0.1062  | 0.015908 | 0.037426 | 515 | 515 |
| NDUFV2    | -0.10618 | 0.015929 | 0.037468 | 515 | 515 |
| C11orf48  | -0.10617 | 0.015935 | 0.037475 | 515 | 515 |
| GATAD1    | -0.10614 | 0.015965 | 0.037543 | 515 | 515 |
| HPCA      | -0.10613 | 0.015974 | 0.037558 | 515 | 506 |
| PAN2      | -0.10611 | 0.015995 | 0.037603 | 515 | 515 |
| SPG21     | -0.10611 | 0.015998 | 0.037607 | 515 | 515 |
| MNAT1     | -0.1061  | 0.016012 | 0.037634 | 515 | 515 |
| STK24     | -0.10605 | 0.016057 | 0.037728 | 515 | 515 |
| NT5C2     | -0.106   | 0.016105 | 0.037829 | 515 | 515 |
| UGT2B28   | -0.106   | 0.016106 | 0.037829 | 515 | 164 |
| PFN2      | -0.106   | 0.016111 | 0.037836 | 515 | 515 |
| RHOV      | -0.10599 | 0.016119 | 0.037852 | 515 | 515 |
| TMEM63A   | -0.10599 | 0.016122 | 0.037854 | 515 | 515 |
| C1orf31   | -0.10594 | 0.01617  | 0.037957 | 515 | 515 |
| STRA8     | -0.10593 | 0.01618  | 0.037977 | 515 | 102 |
| GPATCH2   | -0.1059  | 0.016207 | 0.038036 | 515 | 515 |
| CELF3     | -0.10587 | 0.016236 | 0.038099 | 515 | 364 |
| C7orf36   | -0.10585 | 0.016258 | 0.038147 | 515 | 515 |
| PIK3C2G   | -0.10584 | 0.016268 | 0.038164 | 515 | 390 |
| SMARCE1   | -0.10584 | 0.016274 | 0.038173 | 515 | 515 |
| RPL6      | -0.10567 | 0.016446 | 0.038538 | 515 | 515 |
| TP53I13   | -0.10565 | 0.016464 | 0.038565 | 515 | 515 |
| FAM71D    | -0.10563 | 0.016485 | 0.038607 | 515 | 515 |
| IRX5      | -0.10563 | 0.016486 | 0.038607 | 515 | 514 |
| PCDHA8    | -0.10562 | 0.016491 | 0.038611 | 515 | 443 |
| SUPT6H    | -0.10562 | 0.016493 | 0.038611 | 515 | 515 |
| ZNF511    | -0.10559 | 0.016528 | 0.038687 | 515 | 515 |
| PITPNC1   | -0.10559 | 0.01653  | 0.038688 | 515 | 515 |
| KRTAP17-1 | -0.10558 | 0.016537 | 0.038702 | 515 | 29  |
| ATP8B5P   | -0.10554 | 0.016578 | 0.038782 | 515 | 515 |
| ZDHHC4    | -0.10551 | 0.01661  | 0.038843 | 515 | 515 |
| PNCK      | -0.10551 | 0.016612 | 0.038844 | 515 | 472 |
| GULP1     | -0.1055  | 0.016615 | 0.038846 | 515 | 515 |
| FAM177A1  | -0.1055  | 0.016623 | 0.038858 | 515 | 515 |
| WIPI2     | -0.10546 | 0.016662 | 0.038933 | 515 | 515 |
| ATP5I     | -0.10543 | 0.01669  | 0.038995 | 515 | 515 |
| WNT4      | -0.10541 | 0.01671  | 0.039024 | 515 | 515 |
| CC2D1B    | -0.10541 | 0.01671  | 0.039024 | 515 | 515 |
| RNF121    | -0.10537 | 0.016752 | 0.039111 | 515 | 515 |
| NME2P1    | -0.10534 | 0.016786 | 0.039177 | 515 | 515 |
| LAS1L     | -0.10534 | 0.016788 | 0.039178 | 515 | 515 |
| HTR2C     | -0.10528 | 0.016847 | 0.039307 | 515 | 230 |
| DVWA      | -0.10527 | 0.016856 | 0.039323 | 515 | 398 |
| NUDT22    | -0.10525 | 0.016875 | 0.039358 | 515 | 515 |
| SSX2      | -0.10525 | 0.016882 | 0.039366 | 515 | 113 |
| ARV1      | -0.10522 | 0.016914 | 0.039431 | 515 | 515 |
| TMEM179B  | -0.10521 | 0.016922 | 0.039444 | 515 | 515 |
| PTPN11    | -0.10517 | 0.016963 | 0.03953  | 515 | 515 |
| FMO9P     | -0.10516 | 0.016978 | 0.039556 | 515 | 199 |
| LRP1B     | -0.10514 | 0.016996 | 0.039591 | 515 | 357 |
| C6orf89   | -0.10513 | 0.017003 | 0.039593 | 515 | 515 |
| EXOSC1    | -0.10513 | 0.017003 | 0.039593 | 515 | 515 |
| HMGCL     | -0.10508 | 0.017057 | 0.039707 | 515 | 515 |

|          |          |          |          |     |     |
|----------|----------|----------|----------|-----|-----|
| HM13     | -0.10505 | 0.017094 | 0.039781 | 515 | 515 |
| YLPM1    | -0.10502 | 0.017123 | 0.039839 | 515 | 515 |
| EIF4B    | -0.10496 | 0.017187 | 0.039983 | 515 | 515 |
| HOXD11   | -0.10491 | 0.017238 | 0.040094 | 515 | 238 |
| UBFD1    | -0.10488 | 0.017267 | 0.04015  | 515 | 515 |
| PSME4    | -0.10486 | 0.017293 | 0.040196 | 515 | 515 |
| PCDHA9   | -0.10484 | 0.017317 | 0.040244 | 515 | 434 |
| NDST4    | -0.10483 | 0.017319 | 0.040244 | 515 | 106 |
| C17orf76 | -0.10483 | 0.017325 | 0.040252 | 515 | 515 |
| TOX3     | -0.10479 | 0.017364 | 0.040324 | 515 | 510 |
| CTAG2    | -0.10473 | 0.017435 | 0.040471 | 515 | 147 |
| GSS      | -0.10469 | 0.017477 | 0.040558 | 515 | 515 |
| DHX29    | -0.10464 | 0.017528 | 0.040668 | 515 | 515 |
| GTPBP4   | -0.10458 | 0.017596 | 0.040817 | 515 | 515 |
| TAC3     | -0.10456 | 0.017616 | 0.040852 | 515 | 227 |
| UPF3B    | -0.10451 | 0.017673 | 0.040972 | 515 | 515 |
| EDARADD  | -0.10451 | 0.017674 | 0.040972 | 515 | 515 |
| TMEM211  | -0.10441 | 0.017781 | 0.041182 | 515 | 195 |
| PEX16    | -0.10432 | 0.017875 | 0.041391 | 515 | 515 |
| HUWE1    | -0.10429 | 0.017911 | 0.041459 | 515 | 515 |
| LDOC1L   | -0.10426 | 0.017947 | 0.041533 | 515 | 515 |
| MORN2    | -0.10424 | 0.017971 | 0.041583 | 515 | 515 |
| KLK12    | -0.1042  | 0.018013 | 0.041672 | 515 | 416 |
| TRIM3    | -0.10418 | 0.01803  | 0.041707 | 515 | 515 |
| ZFY      | -0.10417 | 0.018047 | 0.041735 | 515 | 359 |
| ZNF165   | -0.10413 | 0.018091 | 0.041833 | 515 | 515 |
| HIRA     | -0.10412 | 0.018104 | 0.041854 | 515 | 515 |
| ALX1     | -0.10411 | 0.018108 | 0.041858 | 515 | 276 |
| TM2D1    | -0.10411 | 0.018118 | 0.041867 | 515 | 515 |
| HEATR5B  | -0.10409 | 0.018136 | 0.041903 | 515 | 515 |
| MAPK3    | -0.10407 | 0.018157 | 0.041941 | 515 | 515 |
| HOXD13   | -0.10405 | 0.018181 | 0.041988 | 515 | 192 |
| NPM3     | -0.10403 | 0.018207 | 0.042037 | 515 | 515 |
| NANOS3   | -0.10401 | 0.018224 | 0.042067 | 515 | 499 |
| C11orf71 | -0.10399 | 0.018246 | 0.042098 | 515 | 515 |
| ARFGEF2  | -0.10399 | 0.018252 | 0.042108 | 515 | 515 |
| USP47    | -0.10398 | 0.018262 | 0.042127 | 515 | 515 |
| PCDHA2   | -0.10396 | 0.018283 | 0.042161 | 515 | 500 |
| APOM     | -0.10395 | 0.018295 | 0.042183 | 515 | 515 |
| RHBDF1   | -0.10394 | 0.018297 | 0.042183 | 515 | 515 |
| R3HDM2   | -0.10393 | 0.01831  | 0.042202 | 515 | 515 |
| B4GALT4  | -0.1039  | 0.018345 | 0.042274 | 515 | 515 |
| CTH      | -0.1039  | 0.018347 | 0.042274 | 515 | 515 |
| NUP35    | -0.10389 | 0.018354 | 0.042285 | 515 | 515 |
| PSG5     | -0.1038  | 0.018461 | 0.042497 | 515 | 95  |
| RNF113B  | -0.10378 | 0.018485 | 0.042537 | 515 | 182 |
| KIF16B   | -0.10378 | 0.018485 | 0.042537 | 515 | 515 |
| ARPP19   | -0.10377 | 0.018491 | 0.042546 | 515 | 515 |
| PIGV     | -0.10371 | 0.018567 | 0.042705 | 515 | 515 |
| FNTB     | -0.10365 | 0.018629 | 0.042835 | 515 | 515 |
| DYNC2LI1 | -0.1036  | 0.018688 | 0.04296  | 515 | 515 |
| PCDH1    | -0.10356 | 0.018735 | 0.043057 | 515 | 515 |
| SLC27A4  | -0.10356 | 0.018739 | 0.043063 | 515 | 515 |
| ALMS1    | -0.10355 | 0.018745 | 0.043072 | 515 | 515 |

|           |          |          |          |     |     |
|-----------|----------|----------|----------|-----|-----|
| NUDT14    | -0.10355 | 0.018747 | 0.043072 | 515 | 515 |
| ATXN10    | -0.10352 | 0.018777 | 0.043129 | 515 | 515 |
| AUP1      | -0.10349 | 0.018813 | 0.043208 | 515 | 515 |
| PYY       | -0.10348 | 0.018831 | 0.043245 | 515 | 257 |
| TRIB3     | -0.10346 | 0.018852 | 0.043287 | 515 | 515 |
| EIF3L     | -0.10338 | 0.018944 | 0.043469 | 515 | 515 |
| AHI1      | -0.10334 | 0.018988 | 0.043554 | 515 | 515 |
| RLN3      | -0.10333 | 0.018999 | 0.043573 | 515 | 325 |
| PCNXL3    | -0.10327 | 0.019069 | 0.043725 | 515 | 515 |
| FOXA3     | -0.10326 | 0.019086 | 0.043755 | 515 | 515 |
| SYCP1     | -0.1032  | 0.019147 | 0.043875 | 515 | 25  |
| KRBA1     | -0.10318 | 0.019174 | 0.043926 | 515 | 515 |
| TMEM222   | -0.10316 | 0.019197 | 0.043973 | 515 | 515 |
| DHRS7B    | -0.10315 | 0.019214 | 0.044002 | 515 | 515 |
| ERGIC1    | -0.10315 | 0.019214 | 0.044002 | 515 | 515 |
| BARHL2    | -0.10314 | 0.019219 | 0.044008 | 515 | 75  |
| RHOT2     | -0.10313 | 0.019233 | 0.044036 | 515 | 515 |
| HIST1H2AL | -0.1031  | 0.019265 | 0.044093 | 515 | 368 |
| WWC1      | -0.10305 | 0.019334 | 0.044228 | 515 | 515 |
| TMEM208   | -0.10305 | 0.019335 | 0.044228 | 515 | 515 |
| C16orf3   | -0.103   | 0.019388 | 0.044345 | 515 | 485 |
| PHKG2     | -0.10296 | 0.01943  | 0.044437 | 515 | 515 |
| RFXANK    | -0.10295 | 0.019449 | 0.044474 | 515 | 515 |
| IFITM5    | -0.10293 | 0.019476 | 0.044526 | 515 | 282 |
| PCBP2     | -0.10291 | 0.019498 | 0.044572 | 515 | 515 |
| TBL1Y     | -0.10288 | 0.019527 | 0.044631 | 515 | 157 |
| SFRS6     | -0.10285 | 0.019566 | 0.0447   | 515 | 515 |
| CCDC58    | -0.10284 | 0.019574 | 0.044715 | 515 | 515 |
| SLC39A9   | -0.10283 | 0.019592 | 0.044751 | 515 | 515 |
| LRRTM3    | -0.10282 | 0.019601 | 0.044765 | 515 | 183 |
| MTHFS     | -0.1028  | 0.019625 | 0.044814 | 515 | 515 |
| SLC25A35  | -0.10268 | 0.019767 | 0.045105 | 515 | 515 |
| C14orf2   | -0.10268 | 0.019768 | 0.045105 | 515 | 515 |
| UTY       | -0.10267 | 0.019782 | 0.045126 | 515 | 291 |
| BCAR4     | -0.10265 | 0.019808 | 0.04517  | 515 | 205 |
| MYO19     | -0.10265 | 0.019809 | 0.04517  | 515 | 515 |
| FGF11     | -0.10265 | 0.01981  | 0.04517  | 515 | 515 |
| SETMAR    | -0.10263 | 0.019835 | 0.045212 | 515 | 515 |
| PKM2      | -0.10261 | 0.019859 | 0.045262 | 515 | 515 |
| LAMP1     | -0.10257 | 0.019899 | 0.045342 | 515 | 515 |
| LY6G6D    | -0.10257 | 0.019902 | 0.045343 | 515 | 71  |
| CDH8      | -0.10254 | 0.019945 | 0.045426 | 515 | 437 |
| C8orf42   | -0.10251 | 0.019976 | 0.045492 | 515 | 515 |
| C5orf27   | -0.10247 | 0.020021 | 0.045577 | 515 | 488 |
| SNHG8     | -0.10247 | 0.020027 | 0.045587 | 515 | 515 |
| ATXN2L    | -0.10245 | 0.02005  | 0.045628 | 515 | 515 |
| SLC25A21  | -0.10244 | 0.02006  | 0.045647 | 515 | 510 |
| ALKBH2    | -0.10243 | 0.020072 | 0.045663 | 515 | 515 |
| UCHL1     | -0.10239 | 0.020117 | 0.045761 | 515 | 515 |
| SH2B1     | -0.10237 | 0.020148 | 0.045815 | 515 | 515 |
| CRIP2     | -0.10236 | 0.020163 | 0.045839 | 515 | 515 |
| SCXB      | -0.10233 | 0.020197 | 0.045912 | 515 | 495 |
| TP53BP2   | -0.10232 | 0.020202 | 0.045918 | 515 | 515 |
| SIX4      | -0.10228 | 0.02026  | 0.046033 | 515 | 515 |

|           |          |          |          |     |     |
|-----------|----------|----------|----------|-----|-----|
| CENPV     | -0.10224 | 0.0203   | 0.046115 | 515 | 515 |
| CHTF18    | -0.10224 | 0.020303 | 0.046115 | 515 | 515 |
| OGFOD2    | -0.10223 | 0.020322 | 0.046148 | 515 | 515 |
| GIT1      | -0.10219 | 0.020372 | 0.046242 | 515 | 515 |
| CYP4F11   | -0.10215 | 0.020413 | 0.046324 | 515 | 481 |
| SHB       | -0.10209 | 0.020488 | 0.046468 | 515 | 515 |
| RAB3B     | -0.10209 | 0.020494 | 0.046475 | 515 | 439 |
| FKBP1B    | -0.10209 | 0.020496 | 0.046475 | 515 | 515 |
| GNAZ      | -0.10207 | 0.020511 | 0.046503 | 515 | 515 |
| PCP2      | -0.10205 | 0.020536 | 0.046544 | 515 | 490 |
| EXTL2     | -0.10201 | 0.020585 | 0.046645 | 515 | 515 |
| ECSIT     | -0.10201 | 0.020595 | 0.046663 | 515 | 515 |
| CAPZA3    | -0.10199 | 0.020611 | 0.046692 | 515 | 173 |
| UBE2M     | -0.10197 | 0.020638 | 0.046749 | 515 | 515 |
| CHMP2A    | -0.10184 | 0.020801 | 0.047096 | 515 | 515 |
| NOL4      | -0.10183 | 0.020815 | 0.047123 | 515 | 417 |
| GNPTG     | -0.10183 | 0.020818 | 0.047125 | 515 | 515 |
| 5-Mar     | -0.10182 | 0.020829 | 0.047139 | 515 | 515 |
| TSSC1     | -0.10179 | 0.020861 | 0.047201 | 515 | 515 |
| SIRT3     | -0.10178 | 0.020875 | 0.047227 | 515 | 515 |
| ULK3      | -0.10175 | 0.020913 | 0.047297 | 515 | 515 |
| C14orf184 | -0.10174 | 0.02093  | 0.047325 | 515 | 441 |
| TEX264    | -0.10174 | 0.02093  | 0.047325 | 515 | 515 |
| PPOX      | -0.1017  | 0.020979 | 0.047424 | 515 | 515 |
| CYP2D6    | -0.10169 | 0.020995 | 0.04745  | 515 | 507 |
| GXYLT1    | -0.10164 | 0.021056 | 0.047562 | 515 | 515 |
| CCDC34    | -0.10159 | 0.02112  | 0.047688 | 515 | 515 |
| POLR3B    | -0.10155 | 0.021169 | 0.047783 | 515 | 515 |
| LOC100130 | -0.10155 | 0.021175 | 0.047791 | 515 | 503 |
| TCTN2     | -0.10154 | 0.02119  | 0.047821 | 515 | 515 |
| C2orf3    | -0.10153 | 0.021194 | 0.047824 | 515 | 515 |
| PRB3      | -0.10152 | 0.021206 | 0.047846 | 515 | 415 |
| CMBL      | -0.10148 | 0.021257 | 0.047949 | 515 | 515 |
| CPSF6     | -0.10147 | 0.021279 | 0.04799  | 515 | 515 |
| KIDINS220 | -0.10146 | 0.021283 | 0.047992 | 515 | 515 |
| CYorf15A  | -0.1014  | 0.021365 | 0.048167 | 515 | 274 |
| ABHD4     | -0.1014  | 0.02137  | 0.048173 | 515 | 515 |
| CLCNKA    | -0.10136 | 0.021418 | 0.048254 | 515 | 491 |
| CDS1      | -0.10135 | 0.021429 | 0.048273 | 515 | 515 |
| BSDC1     | -0.10135 | 0.021433 | 0.048277 | 515 | 515 |
| ARHGEF35  | -0.10133 | 0.021457 | 0.048313 | 515 | 515 |
| TAS2R38   | -0.10132 | 0.021462 | 0.048321 | 515 | 145 |
| LOC284788 | -0.10128 | 0.021521 | 0.048443 | 515 | 97  |
| ZXDB      | -0.10128 | 0.021526 | 0.048447 | 515 | 515 |
| MTNR1A    | -0.10121 | 0.021608 | 0.048615 | 515 | 354 |
| LOC441869 | -0.10119 | 0.021635 | 0.04867  | 515 | 515 |
| L2HGDH    | -0.10119 | 0.021639 | 0.048673 | 515 | 515 |
| UBE2V2    | -0.10117 | 0.021665 | 0.048722 | 515 | 515 |
| C10orf71  | -0.1011  | 0.02175  | 0.04889  | 515 | 224 |
| CCDC61    | -0.1011  | 0.021752 | 0.048891 | 515 | 515 |
| LOC100132 | -0.10107 | 0.021795 | 0.048975 | 515 | 505 |
| BAIAP2    | -0.10106 | 0.021812 | 0.049008 | 515 | 515 |
| CENPJ     | -0.10102 | 0.021858 | 0.049101 | 515 | 515 |
| MRPS2     | -0.10101 | 0.021866 | 0.049114 | 515 | 515 |



|           |          |          |          |     |     |
|-----------|----------|----------|----------|-----|-----|
| CCDC142   | -0.10098 | 0.021913 | 0.049197 | 515 | 515 |
| CLEC2L    | -0.10094 | 0.021967 | 0.049307 | 515 | 362 |
| YIF1A     | -0.10091 | 0.022003 | 0.049382 | 515 | 515 |
| ALG11     | -0.10091 | 0.022009 | 0.049389 | 515 | 515 |
| DYX1C1    | -0.1009  | 0.022013 | 0.049394 | 515 | 515 |
| CCT7      | -0.1009  | 0.022023 | 0.049409 | 515 | 515 |
| IGF2BP1   | -0.10088 | 0.022049 | 0.049464 | 515 | 450 |
| MRPL51    | -0.10087 | 0.022061 | 0.049478 | 515 | 515 |
| CCDC43    | -0.10082 | 0.022126 | 0.049602 | 515 | 515 |
| FLJ35024  | -0.10081 | 0.02214  | 0.049627 | 515 | 493 |
| USP10     | -0.1008  | 0.022143 | 0.04963  | 515 | 515 |
| TAS1R1    | -0.10078 | 0.022175 | 0.049696 | 515 | 492 |
| TADA2B    | -0.10078 | 0.022178 | 0.049697 | 515 | 515 |
| CEBPD     | -0.10072 | 0.022259 | 0.049867 | 515 | 515 |
| TAF11     | -0.10069 | 0.022302 | 0.049952 | 515 | 515 |
| CEP76     | -0.10066 | 0.022334 | 0.050014 | 515 | 515 |
| C1QTNF9B  | -0.10065 | 0.022351 | 0.050046 | 515 | 422 |
| UBE4A     | -0.10063 | 0.02237  | 0.050077 | 515 | 515 |
| B9D1      | -0.10062 | 0.022384 | 0.050102 | 515 | 515 |
| CHAD      | -0.10062 | 0.022389 | 0.050107 | 515 | 513 |
| LOC100188 | -0.10057 | 0.022461 | 0.050247 | 515 | 285 |
| CACNG8    | -0.10053 | 0.022514 | 0.050353 | 515 | 109 |
| THPO      | -0.10051 | 0.022536 | 0.050398 | 515 | 507 |
| LOC442308 | -0.10049 | 0.022562 | 0.05045  | 515 | 341 |
| MAFG      | -0.10046 | 0.022611 | 0.050541 | 515 | 515 |
| DAZ1      | -0.10045 | 0.022613 | 0.050541 | 515 | 116 |
| DFFA      | -0.10045 | 0.022624 | 0.05056  | 515 | 515 |
| ZSWIM7    | -0.10039 | 0.022695 | 0.050691 | 515 | 515 |
| C9orf23   | -0.10038 | 0.022716 | 0.050727 | 515 | 515 |
| KCNMB3    | -0.10037 | 0.022728 | 0.050746 | 515 | 515 |
| GRAMD1A   | -0.10037 | 0.02273  | 0.050746 | 515 | 515 |
| ANXA13    | -0.10033 | 0.022776 | 0.050837 | 515 | 403 |
| ISOC1     | -0.10032 | 0.022796 | 0.05087  | 515 | 515 |
| MBD3      | -0.10024 | 0.0229   | 0.05108  | 515 | 515 |
| DMRTB1    | -0.10021 | 0.022942 | 0.051144 | 515 | 40  |
| NMRAL1    | -0.10017 | 0.022996 | 0.051253 | 515 | 515 |
| MYO15A    | -0.10016 | 0.023018 | 0.051297 | 515 | 515 |
| CHL1      | -0.1001  | 0.023091 | 0.051436 | 515 | 515 |
| ALDH3B1   | -0.10007 | 0.023139 | 0.051515 | 515 | 515 |
| ADH4      | -0.10004 | 0.023187 | 0.051616 | 515 | 300 |
| ZMYM4     | -0.09997 | 0.023283 | 0.051807 | 515 | 515 |
| TCEB2     | -0.09996 | 0.023295 | 0.051828 | 515 | 515 |
| AMAC1L3   | -0.09995 | 0.02331  | 0.051851 | 515 | 281 |
| LOC84989  | -0.09994 | 0.023323 | 0.051873 | 515 | 513 |
| ANKS4B    | -0.09992 | 0.023342 | 0.051908 | 515 | 387 |
| CPSF3     | -0.09988 | 0.0234   | 0.05202  | 515 | 515 |
| CTCF      | -0.09984 | 0.023454 | 0.052112 | 515 | 515 |
| LHPP      | -0.09979 | 0.02353  | 0.052275 | 515 | 515 |
| MED16     | -0.09977 | 0.023556 | 0.052319 | 515 | 515 |
| METTL3    | -0.09976 | 0.023567 | 0.052329 | 515 | 515 |
| RHBDD2    | -0.09976 | 0.023574 | 0.052338 | 515 | 515 |
| ACADS     | -0.09976 | 0.023577 | 0.052338 | 515 | 515 |
| YIPF4     | -0.09974 | 0.023602 | 0.052382 | 515 | 515 |
| RER1      | -0.0997  | 0.02365  | 0.052472 | 515 | 515 |

|           |          |          |          |     |     |
|-----------|----------|----------|----------|-----|-----|
| TUBAL3    | -0.0997  | 0.023661 | 0.05249  | 515 | 470 |
| ATP5SL    | -0.09969 | 0.023671 | 0.052502 | 515 | 515 |
| ABT1      | -0.09968 | 0.023689 | 0.052529 | 515 | 515 |
| NOL6      | -0.09966 | 0.023705 | 0.052559 | 515 | 515 |
| CSAG1     | -0.09965 | 0.02373  | 0.052605 | 515 | 290 |
| RBP3      | -0.09964 | 0.023732 | 0.052605 | 515 | 118 |
| COPS5     | -0.09964 | 0.023735 | 0.052605 | 515 | 515 |
| C1orf201  | -0.09962 | 0.023766 | 0.052659 | 515 | 515 |
| U2AF1     | -0.09962 | 0.023771 | 0.052659 | 515 | 515 |
| TMEM99    | -0.09959 | 0.023806 | 0.052724 | 515 | 515 |
| GOSR1     | -0.09954 | 0.023882 | 0.052881 | 515 | 515 |
| HIST2H2BE | -0.09951 | 0.023926 | 0.052965 | 515 | 515 |
| DKKL1     | -0.09949 | 0.023954 | 0.05301  | 515 | 485 |
| PRR5      | -0.09946 | 0.02399  | 0.053074 | 515 | 515 |
| MRPL30    | -0.09945 | 0.02401  | 0.053111 | 515 | 515 |
| LCMT1     | -0.09944 | 0.024023 | 0.053134 | 515 | 515 |
| CDK13     | -0.09941 | 0.024071 | 0.053234 | 515 | 515 |
| CT47A2    | -0.09937 | 0.024117 | 0.053329 | 515 | 16  |
| LMX1A     | -0.09935 | 0.024153 | 0.053397 | 515 | 181 |
| PSG9      | -0.09933 | 0.024175 | 0.053441 | 515 | 110 |
| DHCR24    | -0.09933 | 0.024178 | 0.053441 | 515 | 515 |
| RAB3A     | -0.09932 | 0.024201 | 0.053469 | 515 | 515 |
| GLRX2     | -0.09926 | 0.024284 | 0.053647 | 515 | 515 |
| LOC728606 | -0.09925 | 0.024298 | 0.053669 | 515 | 298 |
| MRPL45    | -0.09923 | 0.024317 | 0.053702 | 515 | 515 |
| TCOF1     | -0.09921 | 0.024356 | 0.053768 | 515 | 515 |
| ZP2       | -0.09917 | 0.024409 | 0.053863 | 515 | 194 |
| EIF3IP1   | -0.09914 | 0.024458 | 0.053953 | 515 | 397 |
| TRMT112   | -0.09911 | 0.024502 | 0.054033 | 515 | 515 |
| CDK10     | -0.09902 | 0.024622 | 0.054284 | 515 | 515 |
| ENTPD6    | -0.09901 | 0.024638 | 0.054313 | 515 | 515 |
| ATF4      | -0.09897 | 0.024704 | 0.054454 | 515 | 515 |
| NUDT13    | -0.09897 | 0.024707 | 0.054454 | 515 | 515 |
| ZNF747    | -0.09896 | 0.024721 | 0.054474 | 515 | 515 |
| GGT6      | -0.09892 | 0.024773 | 0.054563 | 515 | 509 |
| PMM2      | -0.0989  | 0.024805 | 0.054628 | 515 | 515 |
| MGST1     | -0.09888 | 0.024833 | 0.054683 | 515 | 515 |
| COLEC11   | -0.09885 | 0.024876 | 0.054766 | 515 | 513 |
| DIP2B     | -0.09884 | 0.024886 | 0.054781 | 515 | 515 |
| MAPKAPK5  | -0.09883 | 0.024909 | 0.05482  | 515 | 515 |
| MTA2      | -0.09881 | 0.02493  | 0.054849 | 515 | 515 |
| NDOR1     | -0.09878 | 0.024975 | 0.054938 | 515 | 515 |
| COL9A3    | -0.09878 | 0.02498  | 0.054938 | 515 | 513 |
| PRKAA1    | -0.09878 | 0.024984 | 0.054938 | 515 | 515 |
| GEMIN6    | -0.09874 | 0.025038 | 0.055044 | 515 | 515 |
| C2orf29   | -0.0987  | 0.025093 | 0.055157 | 515 | 515 |
| OR56B4    | -0.0987  | 0.025096 | 0.055157 | 515 | 263 |
| MEST      | -0.0987  | 0.0251   | 0.055157 | 515 | 515 |
| FLJ90757  | -0.09868 | 0.025129 | 0.055215 | 515 | 515 |
| TAX1BP3   | -0.09867 | 0.025148 | 0.055241 | 515 | 515 |
| RP9       | -0.09867 | 0.02515  | 0.055241 | 515 | 515 |
| C16orf55  | -0.09865 | 0.025177 | 0.055288 | 515 | 515 |
| GNAT1     | -0.09863 | 0.0252   | 0.055333 | 515 | 136 |
| FAM114A1  | -0.09859 | 0.025258 | 0.055454 | 515 | 515 |

|           |          |          |          |     |     |
|-----------|----------|----------|----------|-----|-----|
| CCDC47    | -0.09859 | 0.025267 | 0.055468 | 515 | 515 |
| EPB49     | -0.09857 | 0.025285 | 0.055501 | 515 | 515 |
| C11orf10  | -0.09857 | 0.025288 | 0.055501 | 515 | 515 |
| EPS8L1    | -0.09856 | 0.025307 | 0.055538 | 515 | 515 |
| PLUNC     | -0.09854 | 0.025343 | 0.055599 | 515 | 491 |
| GABRA3    | -0.09851 | 0.025384 | 0.055681 | 515 | 304 |
| MLL2      | -0.09848 | 0.025427 | 0.05577  | 515 | 515 |
| RABEP2    | -0.09847 | 0.025437 | 0.055785 | 515 | 515 |
| CHST12    | -0.09845 | 0.025464 | 0.05584  | 515 | 515 |
| MFSD2B    | -0.09843 | 0.025498 | 0.055877 | 515 | 515 |
| JAG2      | -0.09839 | 0.025556 | 0.055985 | 515 | 515 |
| DLX6      | -0.09838 | 0.02557  | 0.056009 | 515 | 366 |
| C16orf42  | -0.09838 | 0.025572 | 0.056009 | 515 | 515 |
| VSIG10    | -0.09837 | 0.025593 | 0.056049 | 515 | 515 |
| LASS1     | -0.09836 | 0.025608 | 0.056074 | 515 | 502 |
| DMWD      | -0.09834 | 0.025634 | 0.056125 | 515 | 515 |
| NSFL1C    | -0.09833 | 0.025654 | 0.056163 | 515 | 515 |
| B4GALNT2  | -0.0983  | 0.025702 | 0.056255 | 515 | 409 |
| C6orf106  | -0.09827 | 0.025735 | 0.056311 | 515 | 515 |
| ANKRD57   | -0.09827 | 0.025741 | 0.056317 | 515 | 515 |
| PRH2      | -0.09826 | 0.02575  | 0.056329 | 515 | 511 |
| PMCHL2    | -0.09825 | 0.025765 | 0.056351 | 515 | 19  |
| DNAJA4    | -0.09824 | 0.025787 | 0.056394 | 515 | 515 |
| SGTA      | -0.09824 | 0.025791 | 0.056395 | 515 | 515 |
| ALDH3B2   | -0.09823 | 0.025798 | 0.056405 | 515 | 514 |
| LOC642852 | -0.09823 | 0.025804 | 0.056406 | 515 | 515 |
| SFRS15    | -0.09823 | 0.025804 | 0.056406 | 515 | 515 |
| HCFC1R1   | -0.09822 | 0.025813 | 0.056419 | 515 | 515 |
| FAM185A   | -0.09822 | 0.025817 | 0.05642  | 515 | 515 |
| OTUD7A    | -0.09821 | 0.025835 | 0.056449 | 515 | 496 |
| CFDP1     | -0.09821 | 0.02584  | 0.056453 | 515 | 515 |
| LOC100101 | -0.09816 | 0.025904 | 0.056587 | 515 | 504 |
| PCSK1     | -0.09814 | 0.025944 | 0.056669 | 515 | 510 |
| CLPX      | -0.09813 | 0.025962 | 0.056701 | 515 | 515 |
| EFNA5     | -0.09811 | 0.025984 | 0.056742 | 515 | 515 |
| CYB5R1    | -0.09809 | 0.026015 | 0.056799 | 515 | 515 |
| RAB22A    | -0.09808 | 0.026032 | 0.056829 | 515 | 515 |
| SIRT1     | -0.09807 | 0.026051 | 0.056847 | 515 | 515 |
| WHSC1     | -0.09807 | 0.026052 | 0.056847 | 515 | 515 |
| MTIF2     | -0.09806 | 0.026054 | 0.056847 | 515 | 515 |
| RBMY1J    | -0.09804 | 0.026089 | 0.056906 | 515 | 16  |
| FOXE3     | -0.09803 | 0.026115 | 0.056948 | 515 | 358 |
| SCAND2    | -0.09795 | 0.026236 | 0.057186 | 515 | 515 |
| CEP70     | -0.09793 | 0.026262 | 0.057231 | 515 | 515 |
| SEPHS1    | -0.09787 | 0.026352 | 0.057397 | 515 | 515 |
| SLMO2     | -0.09778 | 0.026493 | 0.057685 | 515 | 515 |
| HNRNPA1L2 | -0.09769 | 0.02663  | 0.057956 | 515 | 515 |
| HLCS      | -0.09765 | 0.026699 | 0.058089 | 515 | 515 |
| RAD1      | -0.09765 | 0.026699 | 0.058089 | 515 | 515 |
| KRT7      | -0.09763 | 0.026723 | 0.058128 | 515 | 515 |
| HDGFL1    | -0.09761 | 0.026761 | 0.058192 | 515 | 30  |
| LOC653566 | -0.09756 | 0.026833 | 0.05833  | 515 | 515 |
| AGAP3     | -0.09754 | 0.026873 | 0.058396 | 515 | 515 |
| C6orf195  | -0.0975  | 0.026935 | 0.058507 | 515 | 308 |

|           |          |          |          |     |     |
|-----------|----------|----------|----------|-----|-----|
| PCGF3     | -0.09749 | 0.026954 | 0.058535 | 515 | 515 |
| NOM01     | -0.09747 | 0.026985 | 0.05859  | 515 | 515 |
| PABPC3    | -0.09745 | 0.027002 | 0.05862  | 515 | 515 |
| FARSA     | -0.09745 | 0.027012 | 0.058629 | 515 | 515 |
| NBPF6     | -0.0974  | 0.027081 | 0.058766 | 515 | 71  |
| TFR2      | -0.09739 | 0.027112 | 0.058827 | 515 | 515 |
| KRTAP5-1C | -0.09736 | 0.027148 | 0.0589   | 515 | 341 |
| PUS7      | -0.0973  | 0.02724  | 0.059079 | 515 | 515 |
| KLHL23    | -0.09723 | 0.027352 | 0.059278 | 515 | 515 |
| TAF5L     | -0.09721 | 0.027391 | 0.059354 | 515 | 515 |
| C7orf51   | -0.09713 | 0.027519 | 0.059593 | 515 | 507 |
| PDX1      | -0.09711 | 0.027545 | 0.059644 | 515 | 277 |
| LGR4      | -0.0971  | 0.027559 | 0.059662 | 515 | 515 |
| TRIM49L   | -0.09706 | 0.027635 | 0.0598   | 515 | 51  |
| OR56A3    | -0.09706 | 0.027635 | 0.0598   | 515 | 76  |
| C12orf51  | -0.09704 | 0.027658 | 0.059835 | 515 | 515 |
| HNRNPD    | -0.09703 | 0.027671 | 0.059852 | 515 | 515 |
| ESPNP     | -0.09697 | 0.02778  | 0.060067 | 515 | 419 |
| TOMM70A   | -0.09696 | 0.027788 | 0.060078 | 515 | 515 |
| NUDT19    | -0.09696 | 0.027796 | 0.060089 | 515 | 515 |
| TARSL2    | -0.09692 | 0.027858 | 0.060188 | 515 | 515 |
| ACAT1     | -0.09692 | 0.02786  | 0.060188 | 515 | 515 |
| C17orf70  | -0.09688 | 0.027926 | 0.060315 | 515 | 515 |
| LOC146336 | -0.09685 | 0.027968 | 0.060388 | 515 | 217 |
| REG3G     | -0.0968  | 0.028054 | 0.060569 | 515 | 26  |
| CYP2W1    | -0.0968  | 0.028057 | 0.060569 | 515 | 336 |
| TRRAP     | -0.09679 | 0.028067 | 0.060576 | 515 | 515 |
| ZC3H14    | -0.09678 | 0.028083 | 0.060604 | 515 | 515 |
| ZNF2      | -0.09677 | 0.028104 | 0.060638 | 515 | 515 |
| FAM109A   | -0.09668 | 0.02824  | 0.060897 | 515 | 515 |
| NUCB2     | -0.09668 | 0.028245 | 0.060902 | 515 | 515 |
| LGI1      | -0.09668 | 0.028253 | 0.060911 | 515 | 140 |
| FLNB      | -0.09668 | 0.028255 | 0.060911 | 515 | 515 |
| AKR1B10   | -0.09667 | 0.028261 | 0.060916 | 515 | 474 |
| GJA10     | -0.09666 | 0.028278 | 0.06094  | 515 | 83  |
| IQCC      | -0.09664 | 0.02832  | 0.061024 | 515 | 515 |
| PRAME     | -0.09663 | 0.028334 | 0.061043 | 515 | 495 |
| MRPS14    | -0.09661 | 0.028364 | 0.061098 | 515 | 515 |
| HDGFRP2   | -0.09653 | 0.028501 | 0.061375 | 515 | 515 |
| CATSPERB  | -0.0965  | 0.028546 | 0.061452 | 515 | 506 |
| KIF1A     | -0.09648 | 0.028578 | 0.061514 | 515 | 488 |
| FLJ36000  | -0.09647 | 0.028594 | 0.061543 | 515 | 79  |
| POP7      | -0.09644 | 0.028644 | 0.061611 | 515 | 515 |
| SLC11A2   | -0.09642 | 0.028679 | 0.061679 | 515 | 515 |
| NLRX1     | -0.09641 | 0.028693 | 0.061702 | 515 | 515 |
| BCAN      | -0.09639 | 0.02872  | 0.061752 | 515 | 504 |
| SHFM1     | -0.09638 | 0.028748 | 0.061798 | 515 | 515 |
| AMBRA1    | -0.09638 | 0.02875  | 0.061798 | 515 | 515 |
| DHX37     | -0.09637 | 0.028762 | 0.061818 | 515 | 515 |
| BTBD2     | -0.09636 | 0.028774 | 0.061837 | 515 | 515 |
| PSMD1     | -0.09636 | 0.028783 | 0.061848 | 515 | 515 |
| RBBP5     | -0.09635 | 0.028796 | 0.06187  | 515 | 515 |
| TNKS      | -0.0963  | 0.028884 | 0.06202  | 515 | 515 |
| PSPC1     | -0.09626 | 0.028935 | 0.062116 | 515 | 515 |

|           |          |          |          |     |     |
|-----------|----------|----------|----------|-----|-----|
| TREH      | -0.09612 | 0.029171 | 0.062561 | 515 | 335 |
| GPATCH3   | -0.0961  | 0.029207 | 0.062626 | 515 | 515 |
| FAM157B   | -0.09606 | 0.029286 | 0.062788 | 515 | 473 |
| DHX57     | -0.09605 | 0.029299 | 0.062809 | 515 | 515 |
| CECR5     | -0.09602 | 0.029344 | 0.062895 | 515 | 515 |
| ATP5B     | -0.09602 | 0.029345 | 0.062895 | 515 | 515 |
| OR52B2    | -0.09602 | 0.029355 | 0.062902 | 515 | 31  |
| LOC285696 | -0.09597 | 0.029428 | 0.063031 | 515 | 374 |
| GATSL2    | -0.09594 | 0.029477 | 0.063116 | 515 | 232 |
| FAM104B   | -0.09593 | 0.029493 | 0.063137 | 515 | 515 |
| EIF2B2    | -0.0959  | 0.029554 | 0.063261 | 515 | 515 |
| PVR       | -0.09589 | 0.02957  | 0.063287 | 515 | 515 |
| FTCD      | -0.09588 | 0.02959  | 0.063324 | 515 | 407 |
| EIF3H     | -0.09586 | 0.029618 | 0.063376 | 515 | 515 |
| TMEM106C  | -0.09585 | 0.029635 | 0.063399 | 515 | 515 |
| LENEP     | -0.09583 | 0.029663 | 0.06344  | 515 | 284 |
| DGKK      | -0.09581 | 0.029712 | 0.063538 | 515 | 90  |
| PLEKHH1   | -0.09578 | 0.029764 | 0.063636 | 515 | 515 |
| SLC9A8    | -0.09575 | 0.029811 | 0.063721 | 515 | 515 |
| ARL1      | -0.09574 | 0.029832 | 0.063753 | 515 | 515 |
| C21orf130 | -0.09573 | 0.029848 | 0.063779 | 515 | 435 |
| TRIM43    | -0.09566 | 0.029956 | 0.063977 | 515 | 56  |
| LARP4B    | -0.09566 | 0.029962 | 0.063983 | 515 | 515 |
| MGC34034  | -0.09564 | 0.029995 | 0.064039 | 515 | 58  |
| GOLGA4    | -0.09552 | 0.0302   | 0.064423 | 515 | 515 |
| QDPR      | -0.09545 | 0.030331 | 0.064688 | 515 | 515 |
| CCDC51    | -0.09543 | 0.030359 | 0.064733 | 515 | 515 |
| HNRNPK    | -0.09543 | 0.03037  | 0.06475  | 515 | 515 |
| AHSA1     | -0.09538 | 0.030443 | 0.064893 | 515 | 515 |
| OR56A1    | -0.09535 | 0.030501 | 0.064996 | 515 | 25  |
| TMEM102   | -0.09535 | 0.030501 | 0.064996 | 515 | 515 |
| BRD3      | -0.09529 | 0.030614 | 0.0652   | 515 | 515 |
| CPLX1     | -0.09528 | 0.030616 | 0.0652   | 515 | 514 |
| PHIP      | -0.09528 | 0.030617 | 0.0652   | 515 | 515 |
| RBBP6     | -0.09527 | 0.030635 | 0.06521  | 515 | 515 |
| ZNF286A   | -0.09527 | 0.030638 | 0.06521  | 515 | 515 |
| BPTF      | -0.09524 | 0.030702 | 0.065325 | 515 | 515 |
| ZBTB8A    | -0.09522 | 0.030723 | 0.065363 | 515 | 515 |
| HNRNPH2   | -0.09522 | 0.030728 | 0.065368 | 515 | 515 |
| UQCRB     | -0.09522 | 0.030737 | 0.06538  | 515 | 515 |
| OR8A1     | -0.09521 | 0.030746 | 0.065393 | 515 | 54  |
| C2orf52   | -0.09519 | 0.030778 | 0.065442 | 515 | 510 |
| KLK14     | -0.09519 | 0.030783 | 0.065442 | 515 | 430 |
| C21orf57  | -0.09519 | 0.03079  | 0.065442 | 515 | 515 |
| GPBP1L1   | -0.09513 | 0.030895 | 0.065632 | 515 | 515 |
| PRDX2     | -0.0951  | 0.030947 | 0.065722 | 515 | 515 |
| WNT3      | -0.09508 | 0.030977 | 0.065771 | 515 | 515 |
| PLEKHM3   | -0.09507 | 0.030996 | 0.065798 | 515 | 515 |
| AP2A2     | -0.09505 | 0.031029 | 0.065853 | 515 | 515 |
| LOC113230 | -0.09505 | 0.031038 | 0.065865 | 515 | 515 |
| C18orf55  | -0.09504 | 0.031042 | 0.065867 | 515 | 515 |
| CALCA     | -0.09503 | 0.031071 | 0.065915 | 515 | 420 |
| TPH2      | -0.09502 | 0.031092 | 0.065952 | 515 | 127 |
| HIST1H1T  | -0.09501 | 0.031103 | 0.065968 | 515 | 273 |

|           |          |          |          |     |     |
|-----------|----------|----------|----------|-----|-----|
| ZNF193    | -0.09501 | 0.03111  | 0.065976 | 515 | 515 |
| GABARAPL3 | -0.09497 | 0.031171 | 0.06609  | 515 | 475 |
| TADA1     | -0.09497 | 0.031174 | 0.06609  | 515 | 515 |
| RBM1A1    | -0.09497 | 0.031182 | 0.066101 | 515 | 48  |
| MCRS1     | -0.09496 | 0.031195 | 0.066121 | 515 | 515 |
| CTAGE1    | -0.09493 | 0.03124  | 0.06621  | 515 | 512 |
| TBCD      | -0.09493 | 0.03125  | 0.066225 | 515 | 515 |
| RBM26     | -0.0949  | 0.0313   | 0.066309 | 515 | 515 |
| ZNF407    | -0.0949  | 0.031307 | 0.066317 | 515 | 515 |
| RPS6KL1   | -0.09489 | 0.031319 | 0.066336 | 515 | 515 |
| SHROOM2   | -0.09485 | 0.031389 | 0.066469 | 515 | 515 |
| TDP2      | -0.09483 | 0.031421 | 0.06653  | 515 | 515 |
| C1orf25   | -0.09479 | 0.031489 | 0.066665 | 515 | 515 |
| SRP68     | -0.09478 | 0.031517 | 0.066706 | 515 | 515 |
| C19orf52  | -0.09474 | 0.031579 | 0.066821 | 515 | 515 |
| KIAA0090  | -0.09467 | 0.031713 | 0.067063 | 515 | 515 |
| PA2G4     | -0.09467 | 0.031713 | 0.067063 | 515 | 515 |
| C17orf90  | -0.09466 | 0.031736 | 0.06709  | 515 | 515 |
| GRIPAP1   | -0.09465 | 0.031743 | 0.067099 | 515 | 515 |
| SYDE2     | -0.09465 | 0.031752 | 0.067099 | 515 | 515 |
| PSG4      | -0.09463 | 0.031781 | 0.067143 | 515 | 129 |
| ANKRD17   | -0.09461 | 0.031831 | 0.067234 | 515 | 515 |
| CTDP1     | -0.0946  | 0.031847 | 0.067255 | 515 | 515 |
| GLRB      | -0.09459 | 0.031861 | 0.067277 | 515 | 515 |
| LRAT      | -0.09457 | 0.031889 | 0.067329 | 515 | 514 |
| TMEM104   | -0.09457 | 0.031902 | 0.067348 | 515 | 515 |
| GPR39     | -0.09453 | 0.031965 | 0.067461 | 515 | 514 |
| PRKRA     | -0.09446 | 0.032088 | 0.067706 | 515 | 515 |
| CATSPER3  | -0.09446 | 0.032098 | 0.06772  | 515 | 510 |
| ARHGEF17  | -0.09445 | 0.032107 | 0.067732 | 515 | 515 |
| FXR1      | -0.09444 | 0.032128 | 0.067769 | 515 | 515 |
| ZNF593    | -0.09439 | 0.032222 | 0.067938 | 515 | 515 |
| IDH3B     | -0.09437 | 0.032269 | 0.068022 | 515 | 515 |
| NIF3L1    | -0.09435 | 0.032298 | 0.068076 | 515 | 515 |
| DHRS4L1   | -0.09433 | 0.032335 | 0.068148 | 515 | 512 |
| INTS7     | -0.09432 | 0.032355 | 0.068175 | 515 | 515 |
| HADH      | -0.09432 | 0.032358 | 0.068175 | 515 | 515 |
| RBM1F     | -0.09429 | 0.032405 | 0.068252 | 515 | 6   |
| EDF1      | -0.09429 | 0.03241  | 0.068255 | 515 | 515 |
| SNTG1     | -0.09427 | 0.032436 | 0.068301 | 515 | 27  |
| DNAH14    | -0.09427 | 0.032445 | 0.068305 | 515 | 515 |
| ALG14     | -0.09427 | 0.032447 | 0.068305 | 515 | 515 |
| HOXA13    | -0.09424 | 0.032507 | 0.068424 | 515 | 218 |
| IMMP1L    | -0.09422 | 0.032531 | 0.06846  | 515 | 515 |
| C1orf223  | -0.09419 | 0.032598 | 0.068594 | 515 | 359 |
| CIAO1     | -0.09416 | 0.032642 | 0.068678 | 515 | 515 |
| LRRC24    | -0.09414 | 0.03269  | 0.068771 | 515 | 497 |
| DALRD3    | -0.09413 | 0.03271  | 0.068807 | 515 | 515 |
| GRID2IP   | -0.09408 | 0.032789 | 0.06896  | 515 | 512 |
| NME1-NME2 | -0.09408 | 0.032801 | 0.068978 | 515 | 514 |
| DYNC1H1   | -0.09407 | 0.032817 | 0.069    | 515 | 515 |
| CNP       | -0.09407 | 0.032819 | 0.069    | 515 | 515 |
| OR10AD1   | -0.09405 | 0.032857 | 0.069072 | 515 | 422 |
| TOMM40    | -0.09405 | 0.032861 | 0.069073 | 515 | 515 |

|           |          |          |          |     |     |
|-----------|----------|----------|----------|-----|-----|
| ING5      | -0.09402 | 0.032912 | 0.069175 | 515 | 515 |
| HOXD10    | -0.09399 | 0.032956 | 0.069244 | 515 | 439 |
| TM9SF2    | -0.09398 | 0.032978 | 0.069276 | 515 | 515 |
| C17orf39  | -0.09398 | 0.032989 | 0.069292 | 515 | 515 |
| C3orf33   | -0.09389 | 0.033147 | 0.069595 | 515 | 515 |
| PLOD3     | -0.09386 | 0.033217 | 0.069735 | 515 | 515 |
| C6orf153  | -0.09379 | 0.03334  | 0.069971 | 515 | 515 |
| LRRC20    | -0.09377 | 0.033371 | 0.070027 | 515 | 515 |
| LRFN2     | -0.09377 | 0.033382 | 0.070044 | 515 | 346 |
| WDR12     | -0.09376 | 0.033404 | 0.070069 | 515 | 515 |
| HGD       | -0.09375 | 0.033408 | 0.070069 | 515 | 511 |
| ETV2      | -0.09373 | 0.033459 | 0.070168 | 515 | 508 |
| MDFI      | -0.09368 | 0.033542 | 0.070332 | 515 | 515 |
| THUMP2    | -0.09368 | 0.033544 | 0.070332 | 515 | 515 |
| LSR       | -0.09367 | 0.033571 | 0.070373 | 515 | 515 |
| THOC6     | -0.09365 | 0.033609 | 0.070446 | 515 | 515 |
| C2CD2     | -0.09364 | 0.033617 | 0.070457 | 515 | 515 |
| ACADM     | -0.09364 | 0.033632 | 0.070473 | 515 | 515 |
| TMCO6     | -0.09357 | 0.033752 | 0.070709 | 515 | 515 |
| SAP18     | -0.09356 | 0.033778 | 0.070756 | 515 | 515 |
| CLRN3     | -0.09354 | 0.033819 | 0.07082  | 515 | 467 |
| KCMF1     | -0.0935  | 0.033892 | 0.070964 | 515 | 515 |
| SLC6A19   | -0.0935  | 0.033898 | 0.070969 | 515 | 156 |
| USP36     | -0.09347 | 0.03395  | 0.071035 | 515 | 515 |
| SPAST     | -0.09345 | 0.033985 | 0.071092 | 515 | 515 |
| GORASP1   | -0.09344 | 0.034    | 0.071117 | 515 | 515 |
| SRM       | -0.09343 | 0.034028 | 0.071153 | 515 | 515 |
| DNAH17    | -0.0934  | 0.034088 | 0.071263 | 515 | 515 |
| C14orf147 | -0.0934  | 0.034093 | 0.071266 | 515 | 515 |
| DUSP8     | -0.09336 | 0.034164 | 0.071407 | 515 | 515 |
| MEIS2     | -0.09335 | 0.03418  | 0.071434 | 515 | 515 |
| PUS3      | -0.09332 | 0.034245 | 0.071562 | 515 | 515 |
| MRPL40    | -0.09328 | 0.03431  | 0.071691 | 515 | 515 |
| SFRS16    | -0.09322 | 0.034426 | 0.071888 | 515 | 515 |
| ASAP3     | -0.09319 | 0.034492 | 0.072002 | 515 | 515 |
| RNF24     | -0.09312 | 0.034618 | 0.072236 | 515 | 515 |
| CHMP1A    | -0.09309 | 0.034695 | 0.072388 | 515 | 515 |
| WASH2P    | -0.09307 | 0.03473  | 0.072424 | 515 | 515 |
| RPS2      | -0.09302 | 0.03482  | 0.072574 | 515 | 515 |
| HFE2      | -0.093   | 0.03487  | 0.07267  | 515 | 295 |
| TOP2B     | -0.09299 | 0.034885 | 0.072693 | 515 | 515 |
| LARS      | -0.09296 | 0.03495  | 0.072807 | 515 | 515 |
| UBE2H     | -0.0929  | 0.035054 | 0.073    | 515 | 515 |
| SYT17     | -0.09289 | 0.03508  | 0.073048 | 515 | 515 |
| MLN       | -0.09287 | 0.035121 | 0.073095 | 515 | 6   |
| ILVBL     | -0.09283 | 0.03519  | 0.07323  | 515 | 515 |
| FLJ12825  | -0.09282 | 0.03521  | 0.073265 | 515 | 493 |
| PRDX1     | -0.09281 | 0.035241 | 0.073321 | 515 | 515 |
| ANGPTL3   | -0.09274 | 0.035379 | 0.073577 | 515 | 316 |
| YAP1      | -0.0927  | 0.035458 | 0.073727 | 515 | 515 |
| DLL3      | -0.09264 | 0.035583 | 0.073955 | 515 | 451 |
| RAD21     | -0.09263 | 0.035588 | 0.073955 | 515 | 515 |
| ST3GAL4   | -0.09263 | 0.03559  | 0.073955 | 515 | 515 |
| KIAA0753  | -0.09263 | 0.035602 | 0.073973 | 515 | 515 |

|           |          |          |          |     |     |
|-----------|----------|----------|----------|-----|-----|
| DSCR6     | -0.09257 | 0.035712 | 0.074178 | 515 | 503 |
| TAF1D     | -0.0925  | 0.035857 | 0.074455 | 515 | 515 |
| C15orf58  | -0.09245 | 0.035965 | 0.074673 | 515 | 515 |
| CTAGE4    | -0.09241 | 0.036027 | 0.074786 | 515 | 514 |
| SLK       | -0.09241 | 0.036042 | 0.07481  | 515 | 515 |
| MCHR2     | -0.09235 | 0.036159 | 0.075029 | 515 | 126 |
| CPAMD8    | -0.09231 | 0.036247 | 0.075195 | 515 | 515 |
| MED17     | -0.09229 | 0.036288 | 0.075257 | 515 | 515 |
| ATP5A1    | -0.09224 | 0.036378 | 0.075435 | 515 | 515 |
| DDX23     | -0.09219 | 0.036491 | 0.075661 | 515 | 515 |
| RNF170    | -0.09218 | 0.036512 | 0.075689 | 515 | 515 |
| ZNF84     | -0.09209 | 0.036678 | 0.076018 | 515 | 515 |
| FAM86B1   | -0.09209 | 0.036682 | 0.076019 | 515 | 515 |
| RHOD      | -0.09208 | 0.036702 | 0.076053 | 515 | 515 |
| ORMDL2    | -0.09203 | 0.036819 | 0.076279 | 515 | 515 |
| NBEA      | -0.092   | 0.036882 | 0.076401 | 515 | 515 |
| ZCCHC3    | -0.09199 | 0.036901 | 0.076432 | 515 | 515 |
| FAM24B    | -0.09195 | 0.036973 | 0.076566 | 515 | 515 |
| CCDC52    | -0.09192 | 0.037043 | 0.076696 | 515 | 515 |
| NRBP2     | -0.09191 | 0.037056 | 0.076715 | 515 | 515 |
| LOC728758 | -0.0919  | 0.037071 | 0.076727 | 515 | 515 |
| GGNBP2    | -0.0919  | 0.037074 | 0.076727 | 515 | 515 |
| ACPT      | -0.0919  | 0.037087 | 0.076747 | 515 | 112 |
| KRTAP5-4  | -0.09189 | 0.037099 | 0.076764 | 515 | 104 |
| AHDC1     | -0.09188 | 0.037126 | 0.07681  | 515 | 515 |
| CAPN13    | -0.09183 | 0.037224 | 0.076983 | 515 | 512 |
| HMGA1     | -0.09181 | 0.037275 | 0.077079 | 515 | 515 |
| GAGE2E    | -0.09179 | 0.0373   | 0.077124 | 515 | 28  |
| C1orf125  | -0.09177 | 0.037347 | 0.077199 | 515 | 373 |
| TMEM62    | -0.09177 | 0.037348 | 0.077199 | 515 | 515 |
| GDPD1     | -0.09177 | 0.037354 | 0.077204 | 515 | 515 |
| NRN1L     | -0.09176 | 0.037365 | 0.077217 | 515 | 478 |
| PPIE      | -0.09176 | 0.037368 | 0.077217 | 515 | 515 |
| RNASE10   | -0.09174 | 0.037415 | 0.077306 | 515 | 382 |
| DAZ3      | -0.09172 | 0.037456 | 0.077381 | 515 | 9   |
| NBR2      | -0.09164 | 0.037614 | 0.077692 | 515 | 515 |
| DCAF13    | -0.09164 | 0.037614 | 0.077692 | 515 | 515 |
| SNORA65   | -0.09163 | 0.037635 | 0.077727 | 515 | 84  |
| C8orf40   | -0.09163 | 0.037647 | 0.077745 | 515 | 515 |
| FKBP8     | -0.09162 | 0.037669 | 0.077781 | 515 | 515 |
| C11orf24  | -0.09161 | 0.037679 | 0.077792 | 515 | 515 |
| MYST1     | -0.09159 | 0.037719 | 0.077844 | 515 | 515 |
| FIBP      | -0.09159 | 0.037735 | 0.07787  | 515 | 515 |
| MDC1      | -0.09158 | 0.03775  | 0.077892 | 515 | 515 |
| WHSC1L1   | -0.09157 | 0.037759 | 0.077903 | 515 | 515 |
| OR8B2     | -0.09156 | 0.037795 | 0.077957 | 515 | 13  |
| TSPYL3    | -0.09153 | 0.037849 | 0.078057 | 515 | 515 |
| BHLHE23   | -0.0915  | 0.037905 | 0.078157 | 515 | 7   |
| SBK2      | -0.09148 | 0.037955 | 0.078243 | 515 | 173 |
| FAM83C    | -0.09147 | 0.037982 | 0.078291 | 515 | 294 |
| ATP9A     | -0.09141 | 0.038096 | 0.078515 | 515 | 515 |
| CCDC56    | -0.09141 | 0.038099 | 0.078515 | 515 | 515 |
| DUSP4     | -0.09137 | 0.038195 | 0.078682 | 515 | 515 |
| PTBP2     | -0.09137 | 0.038195 | 0.078682 | 515 | 515 |



|           |          |          |          |     |     |
|-----------|----------|----------|----------|-----|-----|
| RPL21     | -0.09137 | 0.038198 | 0.078682 | 515 | 490 |
| SAT2      | -0.09134 | 0.038252 | 0.078774 | 515 | 515 |
| SIPA1L2   | -0.09131 | 0.038308 | 0.078873 | 515 | 515 |
| ARFGAP3   | -0.0913  | 0.038346 | 0.078943 | 515 | 515 |
| CGA       | -0.09124 | 0.038463 | 0.079159 | 515 | 272 |
| ANP32D    | -0.09124 | 0.038468 | 0.079161 | 515 | 209 |
| DHFR      | -0.09121 | 0.038532 | 0.079272 | 515 | 515 |
| TMEM187   | -0.0912  | 0.038541 | 0.07928  | 515 | 515 |
| CKAP5     | -0.09118 | 0.038585 | 0.079362 | 515 | 515 |
| ALOX12B   | -0.09117 | 0.038612 | 0.079393 | 515 | 452 |
| APOF      | -0.09116 | 0.038646 | 0.079443 | 515 | 198 |
| UNC5D     | -0.09116 | 0.038647 | 0.079443 | 515 | 291 |
| DNMT3B    | -0.09115 | 0.038649 | 0.079443 | 515 | 515 |
| PELI2     | -0.09113 | 0.038695 | 0.079522 | 515 | 515 |
| PRKY      | -0.09106 | 0.038858 | 0.079816 | 515 | 474 |
| NIPA1     | -0.09104 | 0.038899 | 0.079892 | 515 | 515 |
| SEC61G    | -0.09103 | 0.03892  | 0.079927 | 515 | 515 |
| COPB2     | -0.091   | 0.038987 | 0.080041 | 515 | 515 |
| OR14A16   | -0.09096 | 0.039058 | 0.080154 | 515 | 5   |
| STK11IP   | -0.09095 | 0.039097 | 0.080225 | 515 | 515 |
| PNN       | -0.09094 | 0.039113 | 0.080251 | 515 | 515 |
| SMAD9     | -0.09092 | 0.039153 | 0.080307 | 515 | 515 |
| HEBP2     | -0.09091 | 0.039184 | 0.080341 | 515 | 515 |
| MRPL10    | -0.09091 | 0.039186 | 0.080341 | 515 | 515 |
| LRRC57    | -0.09088 | 0.039237 | 0.080429 | 515 | 515 |
| ARG2      | -0.09087 | 0.039253 | 0.08045  | 515 | 515 |
| PEX11G    | -0.09085 | 0.039302 | 0.08053  | 515 | 515 |
| MYT1      | -0.09083 | 0.039352 | 0.080624 | 515 | 469 |
| KIAA1609  | -0.09083 | 0.039359 | 0.080629 | 515 | 515 |
| GDF9      | -0.09079 | 0.039429 | 0.08074  | 515 | 512 |
| MEGF8     | -0.09077 | 0.039473 | 0.080808 | 515 | 515 |
| YES1      | -0.09077 | 0.039474 | 0.080808 | 515 | 515 |
| GOLGA6L1C | -0.09077 | 0.03948  | 0.080813 | 515 | 515 |
| ZMYND12   | -0.09076 | 0.039507 | 0.080859 | 515 | 515 |
| VPRBP     | -0.09074 | 0.039543 | 0.080923 | 515 | 515 |
| MYCL1     | -0.09072 | 0.039585 | 0.080992 | 515 | 515 |
| C10orf91  | -0.09072 | 0.039588 | 0.080992 | 515 | 494 |
| FAM55B    | -0.0907  | 0.03964  | 0.081089 | 515 | 261 |
| ZIC1      | -0.09067 | 0.039701 | 0.081206 | 515 | 246 |
| NLGN4Y    | -0.09065 | 0.039732 | 0.081245 | 515 | 331 |
| RORC      | -0.09061 | 0.039832 | 0.081408 | 515 | 515 |
| COPS6     | -0.0906  | 0.039858 | 0.08144  | 515 | 515 |
| MUC1      | -0.0906  | 0.03986  | 0.08144  | 515 | 515 |
| BLCAP     | -0.09059 | 0.03987  | 0.081447 | 515 | 515 |
| WDR3      | -0.09059 | 0.039873 | 0.081447 | 515 | 515 |
| NPB       | -0.09059 | 0.039876 | 0.081447 | 515 | 465 |
| MPZL1     | -0.09056 | 0.039937 | 0.081546 | 515 | 515 |
| YRDC      | -0.0905  | 0.040062 | 0.081788 | 515 | 515 |
| KIAA1257  | -0.09049 | 0.040102 | 0.081849 | 515 | 515 |
| PGS1      | -0.09048 | 0.040111 | 0.08186  | 515 | 515 |
| KDM1B     | -0.09047 | 0.040147 | 0.081916 | 515 | 515 |
| PGRMC1    | -0.09047 | 0.040147 | 0.081916 | 515 | 515 |
| KCNK1     | -0.09044 | 0.040212 | 0.082032 | 515 | 515 |
| DSCR4     | -0.09042 | 0.040253 | 0.082108 | 515 | 57  |

|           |          |          |          |     |     |
|-----------|----------|----------|----------|-----|-----|
| MRPS24    | -0.09039 | 0.040322 | 0.082232 | 515 | 515 |
| C10orf113 | -0.09038 | 0.040336 | 0.082243 | 515 | 90  |
| NOB1      | -0.09036 | 0.040393 | 0.082352 | 515 | 515 |
| C12orf27  | -0.09032 | 0.040463 | 0.082478 | 515 | 388 |
| PGBD3     | -0.09025 | 0.040624 | 0.082739 | 515 | 515 |
| ZNF746    | -0.09023 | 0.040673 | 0.08282  | 515 | 515 |
| ATOX8     | -0.09022 | 0.040701 | 0.08287  | 515 | 515 |
| C12orf53  | -0.09019 | 0.040753 | 0.082946 | 515 | 513 |
| EXOSC5    | -0.09019 | 0.040755 | 0.082946 | 515 | 515 |
| ZC3H7A    | -0.0901  | 0.040969 | 0.083364 | 515 | 515 |
| ALOX12P2  | -0.09006 | 0.041065 | 0.083543 | 515 | 484 |
| AKR1E2    | -0.09006 | 0.041065 | 0.083543 | 515 | 512 |
| AHCYL1    | -0.09005 | 0.041087 | 0.083561 | 515 | 515 |
| PRG1      | -0.09    | 0.04118  | 0.083734 | 515 | 103 |
| GPAM      | -0.09    | 0.041196 | 0.08375  | 515 | 515 |
| IGFALS    | -0.08999 | 0.041212 | 0.083774 | 515 | 511 |
| STK31     | -0.08997 | 0.04126  | 0.083848 | 515 | 514 |
| ZDHHC9    | -0.08991 | 0.041396 | 0.084095 | 515 | 515 |
| LOC158572 | -0.08989 | 0.041432 | 0.084159 | 515 | 515 |
| CEP250    | -0.08989 | 0.041445 | 0.08417  | 515 | 515 |
| UBXN8     | -0.08987 | 0.04148  | 0.084232 | 515 | 515 |
| LOC84931  | -0.08984 | 0.041547 | 0.08436  | 515 | 256 |
| MAST2     | -0.08982 | 0.041608 | 0.084442 | 515 | 515 |
| CCDC27    | -0.08975 | 0.041763 | 0.084721 | 515 | 125 |
| MUC5B     | -0.08973 | 0.041797 | 0.084778 | 515 | 515 |
| SMAD6     | -0.08969 | 0.041902 | 0.084968 | 515 | 515 |
| USP7      | -0.0896  | 0.042095 | 0.085326 | 515 | 515 |
| LOH12CR2  | -0.0896  | 0.042108 | 0.085343 | 515 | 515 |
| GRSF1     | -0.08959 | 0.042125 | 0.085369 | 515 | 515 |
| CYP2A7    | -0.08958 | 0.042152 | 0.085401 | 515 | 261 |
| HRSP12    | -0.08958 | 0.042153 | 0.085401 | 515 | 515 |
| USP39     | -0.08954 | 0.042235 | 0.085548 | 515 | 515 |
| NUP153    | -0.08951 | 0.042306 | 0.085674 | 515 | 515 |
| E2F1      | -0.08948 | 0.042382 | 0.085777 | 515 | 515 |
| BRWD1     | -0.08945 | 0.042453 | 0.085911 | 515 | 515 |
| GTF3C5    | -0.08943 | 0.042488 | 0.085973 | 515 | 515 |
| HHAT      | -0.0894  | 0.042567 | 0.086126 | 515 | 515 |
| GALNT2    | -0.0894  | 0.042575 | 0.086133 | 515 | 515 |
| UCN       | -0.08939 | 0.042593 | 0.08616  | 515 | 502 |
| C1orf95   | -0.08935 | 0.042685 | 0.08632  | 515 | 491 |
| TBX18     | -0.08934 | 0.042709 | 0.086351 | 515 | 471 |
| GPC2      | -0.08931 | 0.042782 | 0.086472 | 515 | 514 |
| KRT38     | -0.08929 | 0.042821 | 0.086543 | 515 | 121 |
| SIRT7     | -0.08928 | 0.042853 | 0.086586 | 515 | 515 |
| CCND3     | -0.08928 | 0.042855 | 0.086586 | 515 | 515 |
| ZFP62     | -0.08928 | 0.042855 | 0.086586 | 515 | 515 |
| ZNF321    | -0.08926 | 0.042896 | 0.086659 | 515 | 515 |
| OXCT2     | -0.08923 | 0.042962 | 0.086773 | 515 | 509 |
| AQP5      | -0.08921 | 0.043006 | 0.086847 | 515 | 509 |
| ASB17     | -0.08917 | 0.043112 | 0.087042 | 515 | 30  |
| SNRPF     | -0.08911 | 0.043234 | 0.087253 | 515 | 515 |
| RICH2     | -0.08911 | 0.043252 | 0.087282 | 515 | 515 |
| SEC23IP   | -0.08907 | 0.043337 | 0.087419 | 515 | 515 |
| BRP44     | -0.08904 | 0.043412 | 0.087552 | 515 | 515 |

|           |          |          |          |     |     |
|-----------|----------|----------|----------|-----|-----|
| TUBG2     | -0.08901 | 0.043481 | 0.087673 | 515 | 515 |
| MCEE      | -0.08899 | 0.043519 | 0.08774  | 515 | 515 |
| HNRNPM    | -0.08898 | 0.043551 | 0.087788 | 515 | 515 |
| C9orf172  | -0.08894 | 0.043641 | 0.087961 | 515 | 513 |
| C6orf41   | -0.08891 | 0.043724 | 0.0881   | 515 | 513 |
| ZNF212    | -0.08887 | 0.043825 | 0.088268 | 515 | 515 |
| SERPINC1  | -0.08882 | 0.043938 | 0.088487 | 515 | 415 |
| MTHFSD    | -0.08874 | 0.04412  | 0.088824 | 515 | 515 |
| STK32C    | -0.08874 | 0.044123 | 0.088824 | 515 | 515 |
| OS9       | -0.08869 | 0.044235 | 0.089023 | 515 | 515 |
| C9orf96   | -0.08869 | 0.044245 | 0.089025 | 515 | 514 |
| ACLY      | -0.08868 | 0.044266 | 0.089057 | 515 | 515 |
| LRRC8B    | -0.08858 | 0.0445   | 0.089484 | 515 | 515 |
| FAM149A   | -0.08857 | 0.044526 | 0.089526 | 515 | 515 |
| LOC341056 | -0.08855 | 0.044579 | 0.089624 | 515 | 514 |
| TSPAN3    | -0.08855 | 0.044584 | 0.089625 | 515 | 515 |
| GNAI1     | -0.08852 | 0.044644 | 0.089728 | 515 | 515 |
| AMMECR1L  | -0.08852 | 0.044644 | 0.089728 | 515 | 515 |
| MAPK13    | -0.08851 | 0.044679 | 0.089774 | 515 | 515 |
| FAAH2     | -0.08851 | 0.04468  | 0.089774 | 515 | 515 |
| OSCP1     | -0.08849 | 0.044734 | 0.089872 | 515 | 515 |
| HIST1H4K  | -0.08848 | 0.044742 | 0.08988  | 515 | 184 |
| RCC1      | -0.08847 | 0.044763 | 0.089913 | 515 | 515 |
| PEX1      | -0.08844 | 0.044851 | 0.09008  | 515 | 515 |
| UBL4B     | -0.08843 | 0.044861 | 0.090092 | 515 | 360 |
| SPPL3     | -0.08842 | 0.044885 | 0.090129 | 515 | 515 |
| ABLIM1    | -0.08842 | 0.044889 | 0.090129 | 515 | 515 |
| SLC7A5    | -0.0884  | 0.044938 | 0.090201 | 515 | 515 |
| NDUFB4    | -0.08838 | 0.045004 | 0.090305 | 515 | 515 |
| PACS1     | -0.08834 | 0.045089 | 0.090432 | 515 | 515 |
| C18orf32  | -0.08833 | 0.04511  | 0.090447 | 515 | 515 |
| NANS      | -0.08829 | 0.045205 | 0.090627 | 515 | 515 |
| SRRM2     | -0.08827 | 0.045259 | 0.090717 | 515 | 515 |
| TMEM20    | -0.08826 | 0.045291 | 0.090773 | 515 | 515 |
| VWA5B2    | -0.08824 | 0.045333 | 0.090848 | 515 | 492 |
| FARSB     | -0.08823 | 0.045363 | 0.090898 | 515 | 515 |
| GNGT1     | -0.0882  | 0.045426 | 0.090989 | 515 | 356 |
| CAMK2G    | -0.08816 | 0.045539 | 0.091197 | 515 | 515 |
| RBM46     | -0.08814 | 0.04558  | 0.091258 | 515 | 306 |
| WFS1      | -0.08814 | 0.045584 | 0.091258 | 515 | 515 |
| SLC7A10   | -0.08814 | 0.045587 | 0.091258 | 515 | 459 |
| C17orf77  | -0.08812 | 0.045631 | 0.091327 | 515 | 43  |
| C12orf50  | -0.08809 | 0.045707 | 0.09147  | 515 | 172 |
| CASP14    | -0.08807 | 0.04575  | 0.091539 | 515 | 90  |
| IVNS1ABP  | -0.08807 | 0.045763 | 0.091554 | 515 | 515 |
| TIRAP     | -0.08801 | 0.045894 | 0.091778 | 515 | 515 |
| ERCC6     | -0.088   | 0.045921 | 0.091824 | 515 | 515 |
| SPRN      | -0.08799 | 0.045946 | 0.091864 | 515 | 515 |
| NADK      | -0.08793 | 0.046109 | 0.092163 | 515 | 515 |
| TRIM33    | -0.0879  | 0.046182 | 0.0923   | 515 | 515 |
| GRLF1     | -0.08789 | 0.046192 | 0.09231  | 515 | 515 |
| ARHGAP1   | -0.08788 | 0.046223 | 0.092363 | 515 | 515 |
| KLHL21    | -0.08788 | 0.046237 | 0.092372 | 515 | 515 |
| DAZ2      | -0.08784 | 0.046329 | 0.092538 | 515 | 23  |

|           |          |          |          |     |     |
|-----------|----------|----------|----------|-----|-----|
| SIAE      | -0.08781 | 0.046389 | 0.092639 | 515 | 515 |
| TRIM40    | -0.0878  | 0.046433 | 0.092717 | 515 | 207 |
| DIRC2     | -0.08779 | 0.046456 | 0.092745 | 515 | 515 |
| TBC1D10B  | -0.08779 | 0.046461 | 0.092746 | 515 | 515 |
| LPAR1     | -0.08777 | 0.046496 | 0.092807 | 515 | 515 |
| RBPMS     | -0.08769 | 0.046707 | 0.09317  | 515 | 515 |
| B3GALT4   | -0.08769 | 0.046712 | 0.09317  | 515 | 515 |
| THSD4     | -0.08768 | 0.046716 | 0.09317  | 515 | 515 |
| SLC25A39  | -0.08765 | 0.046812 | 0.093344 | 515 | 515 |
| CHCHD2    | -0.08759 | 0.046949 | 0.093598 | 515 | 515 |
| RPS24     | -0.08746 | 0.047293 | 0.094236 | 515 | 515 |
| PCLO      | -0.0874  | 0.047433 | 0.094487 | 515 | 515 |
| MLXIPL    | -0.08738 | 0.047487 | 0.094585 | 515 | 513 |
| SLC30A8   | -0.08737 | 0.047516 | 0.094635 | 515 | 348 |
| XAB2      | -0.08735 | 0.047566 | 0.094724 | 515 | 515 |
| C14orf176 | -0.08735 | 0.047574 | 0.09473  | 515 | 511 |
| HTN1      | -0.08734 | 0.047593 | 0.09476  | 515 | 5   |
| FAM9B     | -0.08732 | 0.04764  | 0.094835 | 515 | 146 |
| C6orf127  | -0.0873  | 0.047695 | 0.094924 | 515 | 248 |
| FGG       | -0.08728 | 0.047732 | 0.094988 | 515 | 507 |
| UTP20     | -0.08727 | 0.047771 | 0.095047 | 515 | 515 |
| ITFG2     | -0.08726 | 0.047788 | 0.095063 | 515 | 515 |
| BCL7C     | -0.08725 | 0.047808 | 0.095093 | 515 | 515 |
| SFRS4     | -0.08724 | 0.04785  | 0.095166 | 515 | 515 |
| SIGIRR    | -0.08723 | 0.047874 | 0.095199 | 515 | 515 |
| HOXC9     | -0.08723 | 0.047876 | 0.095199 | 515 | 482 |
| UNC93B1   | -0.08721 | 0.047917 | 0.095271 | 515 | 515 |
| CPE       | -0.08721 | 0.047933 | 0.095293 | 515 | 515 |
| ART1      | -0.08711 | 0.048189 | 0.095737 | 515 | 254 |
| ARF5      | -0.08708 | 0.048258 | 0.095854 | 515 | 515 |
| LIN7C     | -0.08707 | 0.048293 | 0.095915 | 515 | 515 |
| CBR3      | -0.08705 | 0.048342 | 0.096002 | 515 | 515 |
| GCNT3     | -0.08704 | 0.048368 | 0.096036 | 515 | 515 |
| RALGAPB   | -0.08701 | 0.048439 | 0.096137 | 515 | 515 |
| ENTPD7    | -0.08694 | 0.048616 | 0.09644  | 515 | 515 |
| CCDC57    | -0.08691 | 0.048691 | 0.096571 | 515 | 515 |
| C6orf226  | -0.08689 | 0.048756 | 0.096679 | 515 | 515 |
| PHF8      | -0.08688 | 0.048778 | 0.096705 | 515 | 515 |
| SEPT14    | -0.08684 | 0.048866 | 0.096861 | 515 | 108 |
| CSNK1D    | -0.08681 | 0.048962 | 0.09703  | 515 | 515 |
| GABRB1    | -0.08675 | 0.049124 | 0.097341 | 515 | 157 |
| FAM158A   | -0.08674 | 0.049131 | 0.097347 | 515 | 515 |
| LOC100130 | -0.08668 | 0.049298 | 0.09762  | 515 | 142 |
| UHRF1BP1  | -0.08667 | 0.049329 | 0.097672 | 515 | 515 |
| ZNF398    | -0.08667 | 0.049336 | 0.097675 | 515 | 515 |
| TAF1C     | -0.08666 | 0.049348 | 0.097679 | 515 | 515 |
| SOHLH2    | -0.08663 | 0.049435 | 0.097814 | 515 | 484 |
| CFC1B     | -0.08663 | 0.049442 | 0.097816 | 515 | 125 |
| GLRA2     | -0.08658 | 0.049569 | 0.09803  | 515 | 71  |
| DBN1      | -0.08653 | 0.049701 | 0.098262 | 515 | 515 |
| HMG20B    | -0.08652 | 0.049721 | 0.098292 | 515 | 515 |
| TMEM170B  | -0.0865  | 0.049785 | 0.098408 | 515 | 515 |
| LOC100133 | -0.08646 | 0.049868 | 0.098557 | 515 | 515 |
| FAM83F    | -0.08646 | 0.04987  | 0.098557 | 515 | 504 |

|           |          |          |          |     |     |
|-----------|----------|----------|----------|-----|-----|
| TMED10    | -0.08646 | 0.049892 | 0.09858  | 515 | 515 |
| NOP56     | -0.08644 | 0.049929 | 0.098644 | 515 | 515 |
| EFHD1     | -0.08644 | 0.049934 | 0.098644 | 515 | 515 |
| RAB15     | -0.08643 | 0.049949 | 0.098665 | 515 | 515 |
| SSSCA1    | -0.08638 | 0.050083 | 0.09887  | 515 | 515 |
| SRCIN1    | -0.0863  | 0.050312 | 0.099263 | 515 | 514 |
| RALGPS1   | -0.08627 | 0.050392 | 0.099401 | 515 | 515 |
| UBXN2B    | -0.08623 | 0.050485 | 0.099546 | 515 | 515 |
| C1orf124  | -0.08614 | 0.050742 | 0.099973 | 515 | 515 |
| LCE3A     | -0.08611 | 0.050819 | 0.100091 | 515 | 21  |
| CTXN1     | -0.08607 | 0.050912 | 0.100259 | 515 | 515 |
| SEH1L     | -0.08606 | 0.050962 | 0.100328 | 515 | 515 |
| INA       | -0.08604 | 0.051017 | 0.100427 | 515 | 494 |
| ZNF248    | -0.08599 | 0.051132 | 0.100627 | 515 | 515 |
| FBXO25    | -0.08598 | 0.051174 | 0.100696 | 515 | 515 |
| C17orf107 | -0.08596 | 0.051213 | 0.100762 | 515 | 515 |
| ZNF335    | -0.08596 | 0.051232 | 0.100775 | 515 | 515 |
| PAQR9     | -0.08596 | 0.051235 | 0.100775 | 515 | 137 |
| GDF1      | -0.08593 | 0.051313 | 0.100912 | 515 | 372 |
| COPS7A    | -0.0859  | 0.051382 | 0.101034 | 515 | 515 |
| DDX25     | -0.0859  | 0.051395 | 0.101041 | 515 | 306 |
| OR2M3     | -0.08588 | 0.051429 | 0.101088 | 515 | 7   |
| NR2C2AP   | -0.08588 | 0.051436 | 0.101091 | 515 | 515 |
| MON1A     | -0.08586 | 0.051487 | 0.101162 | 515 | 515 |
| DCTN6     | -0.08582 | 0.051604 | 0.101373 | 515 | 515 |
| DGAT2     | -0.08581 | 0.051626 | 0.101396 | 515 | 515 |
| MESDC2    | -0.08578 | 0.05172  | 0.10156  | 515 | 515 |
| PDDC1     | -0.08575 | 0.051809 | 0.101725 | 515 | 515 |
| HEY1      | -0.08571 | 0.051902 | 0.101857 | 515 | 515 |
| CASC3     | -0.08569 | 0.051973 | 0.101986 | 515 | 515 |
| ACTN4     | -0.08568 | 0.051992 | 0.102015 | 515 | 515 |
| UBOX5     | -0.08566 | 0.052038 | 0.102095 | 515 | 515 |
| HSD17B8   | -0.08565 | 0.052061 | 0.102128 | 515 | 515 |
| FAM125A   | -0.08564 | 0.052087 | 0.10217  | 515 | 515 |
| PROM2     | -0.0856  | 0.052208 | 0.102398 | 515 | 515 |
| LOC440040 | -0.08557 | 0.052277 | 0.102505 | 515 | 178 |
| ANKZF1    | -0.08557 | 0.052278 | 0.102505 | 515 | 515 |
| TRIP11    | -0.08556 | 0.052311 | 0.10256  | 515 | 515 |
| CYP27C1   | -0.08555 | 0.052335 | 0.102597 | 515 | 514 |
| CXXC5     | -0.08554 | 0.052365 | 0.102645 | 515 | 515 |
| CALML6    | -0.08554 | 0.052376 | 0.102656 | 515 | 391 |
| GRM4      | -0.08552 | 0.052425 | 0.102729 | 515 | 453 |
| TP53I11   | -0.08552 | 0.052436 | 0.102733 | 515 | 515 |
| PHF2      | -0.0855  | 0.052496 | 0.10284  | 515 | 515 |
| MLH3      | -0.08545 | 0.052629 | 0.103081 | 515 | 515 |
| LRRC59    | -0.08544 | 0.052663 | 0.103128 | 515 | 515 |
| ZNF280A   | -0.08536 | 0.052871 | 0.103515 | 515 | 231 |
| ZDHHC1    | -0.08534 | 0.052942 | 0.103633 | 515 | 515 |
| LOC389332 | -0.08532 | 0.052999 | 0.103734 | 515 | 251 |
| LARS2     | -0.0853  | 0.05303  | 0.103786 | 515 | 515 |
| ATG4B     | -0.08529 | 0.053077 | 0.10386  | 515 | 515 |
| ZNF837    | -0.08529 | 0.053078 | 0.10386  | 515 | 513 |
| PAGE2     | -0.08525 | 0.053184 | 0.104026 | 515 | 104 |
| SLC30A3   | -0.08524 | 0.053199 | 0.104045 | 515 | 497 |

|           |          |          |          |     |     |
|-----------|----------|----------|----------|-----|-----|
| OR56A5    | -0.08523 | 0.053245 | 0.104125 | 515 | 50  |
| GAGE10    | -0.08519 | 0.05336  | 0.104319 | 515 | 49  |
| EIF6      | -0.08517 | 0.053414 | 0.104415 | 515 | 515 |
| PROKR1    | -0.08514 | 0.053479 | 0.104531 | 515 | 293 |
| RPP38     | -0.08512 | 0.053537 | 0.104634 | 515 | 515 |
| GARS      | -0.0851  | 0.053607 | 0.104751 | 515 | 515 |
| GAGE1     | -0.08508 | 0.053663 | 0.10485  | 515 | 58  |
| TIMELESS  | -0.08506 | 0.05371  | 0.104911 | 515 | 515 |
| POLR2F    | -0.08502 | 0.053838 | 0.10512  | 515 | 515 |
| ABHD2     | -0.08497 | 0.05398  | 0.105367 | 515 | 515 |
| LSM1      | -0.08493 | 0.054084 | 0.105539 | 515 | 515 |
| NPLOC4    | -0.08492 | 0.0541   | 0.105559 | 515 | 515 |
| CT47B1    | -0.0849  | 0.054161 | 0.105657 | 515 | 46  |
| PALM3     | -0.08489 | 0.054185 | 0.105691 | 515 | 513 |
| RPL7      | -0.08489 | 0.054189 | 0.105691 | 515 | 515 |
| KRT31     | -0.08489 | 0.0542   | 0.105702 | 515 | 132 |
| PPY2      | -0.08489 | 0.054207 | 0.105707 | 515 | 203 |
| TDG       | -0.08488 | 0.054218 | 0.105717 | 515 | 515 |
| ZNF778    | -0.08486 | 0.05427  | 0.105809 | 515 | 515 |
| HDAC5     | -0.08485 | 0.054302 | 0.10586  | 515 | 515 |
| CCDC30    | -0.0848  | 0.054465 | 0.106137 | 515 | 515 |
| ZDHHC12   | -0.08478 | 0.05452  | 0.106235 | 515 | 515 |
| NDEL1     | -0.08477 | 0.054532 | 0.106248 | 515 | 515 |
| ZNF541    | -0.08477 | 0.054544 | 0.106255 | 515 | 512 |
| NIPAL1    | -0.08477 | 0.054548 | 0.106255 | 515 | 515 |
| RPS26P11  | -0.08475 | 0.054591 | 0.106321 | 515 | 424 |
| FAM131A   | -0.08472 | 0.05468  | 0.106484 | 515 | 515 |
| XKR8      | -0.08472 | 0.054695 | 0.106501 | 515 | 515 |
| AKR1C4    | -0.08471 | 0.05472  | 0.10653  | 515 | 249 |
| RBMY2FP   | -0.0847  | 0.054744 | 0.106559 | 515 | 20  |
| TLN2      | -0.0847  | 0.054746 | 0.106559 | 515 | 515 |
| NDUFB9    | -0.08465 | 0.05488  | 0.106768 | 515 | 515 |
| PMPCA     | -0.08463 | 0.054942 | 0.106859 | 515 | 515 |
| PABPC1    | -0.08454 | 0.055207 | 0.107269 | 515 | 515 |
| MINA      | -0.08448 | 0.055387 | 0.107588 | 515 | 515 |
| AGXT      | -0.08444 | 0.055505 | 0.107786 | 515 | 138 |
| PABPC1P2  | -0.08438 | 0.055677 | 0.108078 | 515 | 296 |
| PRINS     | -0.08435 | 0.055748 | 0.108195 | 515 | 437 |
| TREML3    | -0.08434 | 0.05577  | 0.108226 | 515 | 488 |
| TERF1     | -0.08434 | 0.055795 | 0.108258 | 515 | 515 |
| SFRS9     | -0.08433 | 0.055797 | 0.108258 | 515 | 515 |
| HDAC2     | -0.08432 | 0.055831 | 0.108292 | 515 | 515 |
| RAB11FIP3 | -0.08429 | 0.055917 | 0.108448 | 515 | 515 |
| PRPF3     | -0.08418 | 0.056252 | 0.109013 | 515 | 515 |
| CIB4      | -0.08416 | 0.056305 | 0.109095 | 515 | 166 |
| GLYR1     | -0.08416 | 0.056319 | 0.109111 | 515 | 515 |
| DUSP16    | -0.08414 | 0.056371 | 0.109191 | 515 | 515 |
| VPS28     | -0.0841  | 0.056481 | 0.109372 | 515 | 515 |
| NPHP4     | -0.08409 | 0.056524 | 0.109434 | 515 | 515 |
| SECISBP2L | -0.08407 | 0.056569 | 0.10951  | 515 | 515 |
| PP14571   | -0.08407 | 0.056578 | 0.109519 | 515 | 501 |
| MT1IP     | -0.08401 | 0.056765 | 0.109848 | 515 | 152 |
| DEFB132   | -0.08397 | 0.056869 | 0.110028 | 515 | 6   |
| TANC2     | -0.08394 | 0.056944 | 0.11014  | 515 | 515 |

|           |          |          |          |     |     |
|-----------|----------|----------|----------|-----|-----|
| MAPK1IP1L | -0.08394 | 0.056949 | 0.11014  | 515 | 515 |
| PER1      | -0.08394 | 0.056958 | 0.110147 | 515 | 515 |
| KRTAP5-8  | -0.08391 | 0.05706  | 0.110323 | 515 | 340 |
| COG6      | -0.08387 | 0.057167 | 0.110476 | 515 | 515 |
| NAA40     | -0.08386 | 0.057206 | 0.110539 | 515 | 515 |
| LOC220429 | -0.08385 | 0.057211 | 0.110539 | 515 | 493 |
| HK1       | -0.08384 | 0.057241 | 0.110586 | 515 | 515 |
| AQP7      | -0.08383 | 0.057275 | 0.110642 | 515 | 502 |
| ZIC3      | -0.08381 | 0.057348 | 0.110741 | 515 | 125 |
| CCNY      | -0.08381 | 0.057355 | 0.110743 | 515 | 515 |
| VPS35     | -0.0838  | 0.057363 | 0.110747 | 515 | 515 |
| SCRN3     | -0.08376 | 0.057486 | 0.110975 | 515 | 515 |
| PDCL2     | -0.08375 | 0.057521 | 0.11102  | 515 | 110 |
| BRE       | -0.08374 | 0.057552 | 0.11107  | 515 | 515 |
| WASH5P    | -0.08372 | 0.057617 | 0.111173 | 515 | 515 |
| STUB1     | -0.0837  | 0.057667 | 0.111249 | 515 | 515 |
| ZNHIT1    | -0.0837  | 0.057681 | 0.111259 | 515 | 515 |
| ZNF146    | -0.0837  | 0.057683 | 0.111259 | 515 | 515 |
| TTY2      | -0.08367 | 0.057754 | 0.111374 | 515 | 76  |
| LY6G6C    | -0.08367 | 0.05776  | 0.111375 | 515 | 365 |
| SYT14     | -0.08367 | 0.057772 | 0.111387 | 515 | 330 |
| C14orf162 | -0.08365 | 0.057826 | 0.11148  | 515 | 260 |
| CELF1     | -0.08363 | 0.057887 | 0.111576 | 515 | 515 |
| GPR133    | -0.08363 | 0.057887 | 0.111576 | 515 | 515 |
| THAP3     | -0.08359 | 0.058015 | 0.111784 | 515 | 515 |
| ZW10      | -0.08359 | 0.058019 | 0.111784 | 515 | 515 |
| TPI1      | -0.08358 | 0.058023 | 0.111784 | 515 | 515 |
| VKORC1    | -0.08358 | 0.058042 | 0.111809 | 515 | 515 |
| ANO3      | -0.08357 | 0.058056 | 0.111816 | 515 | 505 |
| INTS5     | -0.08353 | 0.058173 | 0.11203  | 515 | 515 |
| NLRP8     | -0.08352 | 0.058225 | 0.112099 | 515 | 87  |
| SCML2     | -0.0835  | 0.058267 | 0.112158 | 515 | 515 |
| RMND5B    | -0.0835  | 0.058268 | 0.112158 | 515 | 515 |
| GPRC5A    | -0.08349 | 0.058301 | 0.112213 | 515 | 515 |
| GPX6      | -0.08349 | 0.05831  | 0.112218 | 515 | 19  |
| HSBP1     | -0.08348 | 0.058346 | 0.112276 | 515 | 515 |
| TOP3B     | -0.08347 | 0.058372 | 0.112306 | 515 | 515 |
| RGS12     | -0.08345 | 0.058414 | 0.112376 | 515 | 515 |
| DNAJC17   | -0.08344 | 0.058443 | 0.11241  | 515 | 515 |
| TMEM41A   | -0.08344 | 0.058456 | 0.112412 | 515 | 515 |
| APH1A     | -0.08341 | 0.058547 | 0.112559 | 515 | 515 |
| FSTL4     | -0.08341 | 0.058549 | 0.112559 | 515 | 507 |
| FLJ42875  | -0.0834  | 0.058564 | 0.112578 | 515 | 505 |
| YKT6      | -0.08337 | 0.05866  | 0.11273  | 515 | 515 |
| CTAGE5    | -0.08335 | 0.058731 | 0.112843 | 515 | 515 |
| THOP1     | -0.08334 | 0.058751 | 0.112868 | 515 | 515 |
| LETMD1    | -0.08333 | 0.05879  | 0.112926 | 515 | 515 |
| ABL1      | -0.08333 | 0.058804 | 0.11294  | 515 | 515 |
| DPF2      | -0.08329 | 0.058907 | 0.113096 | 515 | 515 |
| TMEM168   | -0.08329 | 0.05892  | 0.113109 | 515 | 515 |
| C8orf75   | -0.08326 | 0.058997 | 0.113235 | 515 | 409 |
| SAMD5     | -0.08322 | 0.059141 | 0.113478 | 515 | 515 |
| RRP9      | -0.0832  | 0.059188 | 0.113547 | 515 | 515 |
| TMEM14B   | -0.08319 | 0.059231 | 0.113609 | 515 | 515 |

|          |          |          |          |     |     |
|----------|----------|----------|----------|-----|-----|
| ZDHC11   | -0.08318 | 0.059256 | 0.113624 | 515 | 515 |
| RILPL1   | -0.08317 | 0.059281 | 0.11366  | 515 | 515 |
| SNORA11  | -0.08316 | 0.059306 | 0.113698 | 515 | 21  |
| PSKH2    | -0.08313 | 0.059404 | 0.113875 | 515 | 13  |
| UGT2B11  | -0.08312 | 0.059434 | 0.113921 | 515 | 240 |
| SSX5     | -0.08311 | 0.059455 | 0.11395  | 515 | 111 |
| RAB5A    | -0.0831  | 0.059484 | 0.113995 | 515 | 515 |
| PCDHA13  | -0.08306 | 0.059619 | 0.114198 | 515 | 485 |
| PRSS48   | -0.08306 | 0.05963  | 0.114208 | 515 | 66  |
| FAM197Y2 | -0.083   | 0.059794 | 0.114513 | 515 | 13  |
| GZF1     | -0.08299 | 0.059845 | 0.114599 | 515 | 515 |
| LASS4    | -0.08294 | 0.059983 | 0.114819 | 515 | 515 |
| MYOM1    | -0.08294 | 0.059994 | 0.11483  | 515 | 515 |
| BECN1    | -0.08289 | 0.060153 | 0.115078 | 515 | 515 |
| IYD      | -0.08284 | 0.060306 | 0.115304 | 515 | 511 |
| EEF1D    | -0.08282 | 0.060371 | 0.115385 | 515 | 515 |
| ROM1     | -0.08279 | 0.060469 | 0.11555  | 515 | 515 |
| PAX4     | -0.08272 | 0.060678 | 0.115894 | 515 | 33  |
| ANAPC7   | -0.08271 | 0.060712 | 0.115948 | 515 | 515 |
| CARD10   | -0.08266 | 0.060854 | 0.116197 | 515 | 515 |
| INO80E   | -0.08265 | 0.060885 | 0.116234 | 515 | 515 |
| CBX3     | -0.08264 | 0.060928 | 0.116298 | 515 | 515 |
| BAG3     | -0.08264 | 0.06093  | 0.116298 | 515 | 515 |
| GAST     | -0.08261 | 0.061013 | 0.116432 | 515 | 74  |
| CEP72    | -0.08261 | 0.061018 | 0.116432 | 515 | 515 |
| TAF1L    | -0.08259 | 0.061071 | 0.116522 | 515 | 515 |
| TSKU     | -0.08259 | 0.061092 | 0.116551 | 515 | 515 |
| C15orf40 | -0.08257 | 0.061135 | 0.116623 | 515 | 515 |
| MED19    | -0.08254 | 0.061224 | 0.116782 | 515 | 515 |
| UQCR10   | -0.08242 | 0.061624 | 0.117455 | 515 | 515 |
| RNF183   | -0.08238 | 0.06174  | 0.11763  | 515 | 499 |
| MTCH1    | -0.08238 | 0.061752 | 0.117642 | 515 | 515 |
| HNRNPUL1 | -0.08234 | 0.06186  | 0.117803 | 515 | 515 |
| ASAH2    | -0.08233 | 0.061904 | 0.117876 | 515 | 506 |
| PPA2     | -0.08231 | 0.061958 | 0.117959 | 515 | 515 |
| MRPL36   | -0.08227 | 0.062092 | 0.118188 | 515 | 515 |
| ZC3HAV1L | -0.08227 | 0.062103 | 0.118197 | 515 | 515 |
| MOB2     | -0.08225 | 0.062158 | 0.118292 | 515 | 515 |
| RALYL    | -0.08225 | 0.062171 | 0.118305 | 515 | 84  |
| HIST1H4E | -0.08224 | 0.062181 | 0.118313 | 515 | 412 |
| YOD1     | -0.08216 | 0.062455 | 0.118777 | 515 | 515 |
| SPATA20  | -0.08215 | 0.062477 | 0.118807 | 515 | 515 |
| SORCS3   | -0.08215 | 0.062487 | 0.118813 | 515 | 224 |
| ZNF7     | -0.0821  | 0.06265  | 0.119057 | 515 | 515 |
| CIB2     | -0.08209 | 0.062676 | 0.119097 | 515 | 515 |
| XKRY2    | -0.08208 | 0.062685 | 0.119102 | 515 | 47  |
| GSK3B    | -0.08206 | 0.062754 | 0.119199 | 515 | 515 |
| WAC      | -0.08198 | 0.063025 | 0.119645 | 515 | 515 |
| GPR179   | -0.08197 | 0.06307  | 0.119709 | 515 | 503 |
| MAP2K3   | -0.08194 | 0.063161 | 0.119858 | 515 | 515 |
| POU3F3   | -0.08193 | 0.0632   | 0.119916 | 515 | 99  |
| DNAJB7   | -0.08192 | 0.063204 | 0.119916 | 515 | 487 |
| MTCH2    | -0.08192 | 0.063221 | 0.119926 | 515 | 515 |
| OBP2B    | -0.08191 | 0.063253 | 0.119975 | 515 | 149 |



|           |          |          |          |     |     |
|-----------|----------|----------|----------|-----|-----|
| TAS2R1    | -0.0819  | 0.063283 | 0.12001  | 515 | 78  |
| KLHL22    | -0.08189 | 0.063298 | 0.120027 | 515 | 515 |
| DHPS      | -0.08186 | 0.063411 | 0.120207 | 515 | 515 |
| COX6C     | -0.08183 | 0.063493 | 0.12034  | 515 | 515 |
| DCAF11    | -0.0818  | 0.06359  | 0.120466 | 515 | 515 |
| ZSWIM5    | -0.0818  | 0.063608 | 0.120489 | 515 | 514 |
| MPL       | -0.08179 | 0.063627 | 0.120513 | 515 | 515 |
| TTC30A    | -0.08179 | 0.063642 | 0.12053  | 515 | 515 |
| IQCF1     | -0.08174 | 0.063798 | 0.120769 | 515 | 218 |
| ZER1      | -0.08173 | 0.063834 | 0.120817 | 515 | 515 |
| FUT1      | -0.08168 | 0.063985 | 0.121065 | 515 | 515 |
| CCDC21    | -0.08168 | 0.064002 | 0.121086 | 515 | 515 |
| IMMP2L    | -0.08163 | 0.064157 | 0.121368 | 515 | 515 |
| CDK3      | -0.08161 | 0.064219 | 0.121457 | 515 | 515 |
| ACYP1     | -0.08161 | 0.064229 | 0.121458 | 515 | 515 |
| VPS39     | -0.08157 | 0.064365 | 0.121691 | 515 | 515 |
| PHACTR4   | -0.08156 | 0.064404 | 0.121742 | 515 | 515 |
| EIF2AK4   | -0.08153 | 0.064489 | 0.121881 | 515 | 515 |
| UTP14C    | -0.08147 | 0.064669 | 0.122174 | 515 | 515 |
| FBN3      | -0.08146 | 0.064731 | 0.122281 | 515 | 487 |
| ALDH5A1   | -0.08142 | 0.064835 | 0.122453 | 515 | 515 |
| C17orf106 | -0.08142 | 0.064844 | 0.122458 | 515 | 515 |
| WDR92     | -0.08142 | 0.064862 | 0.12248  | 515 | 515 |
| C19orf44  | -0.0814  | 0.064903 | 0.122547 | 515 | 515 |
| CHPT1     | -0.08139 | 0.064955 | 0.122612 | 515 | 515 |
| PFKL      | -0.08139 | 0.064962 | 0.122612 | 515 | 515 |
| SULT1A3   | -0.08137 | 0.065013 | 0.122685 | 515 | 515 |
| HYAL3     | -0.08135 | 0.065085 | 0.122809 | 515 | 515 |
| DKC1      | -0.08132 | 0.065166 | 0.122951 | 515 | 515 |
| C8orf22   | -0.08132 | 0.065187 | 0.122967 | 515 | 39  |
| HEATR4    | -0.0813  | 0.065239 | 0.12303  | 515 | 497 |
| GET4      | -0.08128 | 0.065306 | 0.123145 | 515 | 515 |
| PPCS      | -0.08127 | 0.065349 | 0.123203 | 515 | 515 |
| TTC23L    | -0.08125 | 0.065409 | 0.123289 | 515 | 506 |
| USP40     | -0.08125 | 0.065417 | 0.123289 | 515 | 515 |
| EHMT1     | -0.08121 | 0.065536 | 0.123462 | 515 | 515 |
| TMEM89    | -0.0812  | 0.06558  | 0.123521 | 515 | 163 |
| PRKDC     | -0.08118 | 0.065637 | 0.123617 | 515 | 515 |
| USP27X    | -0.0811  | 0.0659   | 0.124078 | 515 | 515 |
| HSPA2     | -0.08107 | 0.066012 | 0.124253 | 515 | 515 |
| USP11     | -0.08105 | 0.066069 | 0.124348 | 515 | 515 |
| LOC731789 | -0.08104 | 0.066122 | 0.124438 | 515 | 301 |
| VCX       | -0.08102 | 0.066186 | 0.124535 | 515 | 195 |
| LRDD      | -0.08094 | 0.066442 | 0.124968 | 515 | 515 |
| C4orf40   | -0.08093 | 0.0665   | 0.125055 | 515 | 18  |
| C7orf13   | -0.08088 | 0.066669 | 0.125359 | 515 | 515 |
| TLX2      | -0.08087 | 0.066675 | 0.125359 | 515 | 351 |
| PHOSPHO2  | -0.08086 | 0.066734 | 0.12546  | 515 | 515 |
| DOLK      | -0.08083 | 0.066814 | 0.125598 | 515 | 515 |
| ZBED1     | -0.08078 | 0.066976 | 0.125862 | 515 | 515 |
| UBN1      | -0.08078 | 0.06698  | 0.125862 | 515 | 515 |
| SPSB3     | -0.08078 | 0.066993 | 0.125874 | 515 | 515 |
| MRPL27    | -0.08076 | 0.067056 | 0.125981 | 515 | 515 |
| AAGAB     | -0.08075 | 0.067084 | 0.126014 | 515 | 515 |

|           |          |          |          |     |     |
|-----------|----------|----------|----------|-----|-----|
| PPIAL4C   | -0.08075 | 0.067086 | 0.126014 | 515 | 515 |
| ACRV1     | -0.08073 | 0.067149 | 0.126121 | 515 | 381 |
| HDHD3     | -0.08071 | 0.067224 | 0.126249 | 515 | 515 |
| MIPOL1    | -0.0807  | 0.067257 | 0.126299 | 515 | 515 |
| AMIG01    | -0.08069 | 0.067303 | 0.126362 | 515 | 515 |
| LOC100128 | -0.08068 | 0.067321 | 0.126383 | 515 | 515 |
| MAGEB1    | -0.08066 | 0.067392 | 0.126506 | 515 | 100 |
| PARP1     | -0.08062 | 0.067553 | 0.12676  | 515 | 515 |
| TMEM105   | -0.08059 | 0.067642 | 0.126916 | 515 | 514 |
| PCM1      | -0.08055 | 0.067767 | 0.127125 | 515 | 515 |
| UBR4      | -0.08053 | 0.067842 | 0.127254 | 515 | 515 |
| XK        | -0.08049 | 0.067968 | 0.127479 | 515 | 515 |
| OR9A2     | -0.08046 | 0.068074 | 0.127665 | 515 | 21  |
| CYP11B2   | -0.08043 | 0.068196 | 0.127883 | 515 | 6   |
| EWSR1     | -0.08041 | 0.068241 | 0.127944 | 515 | 515 |
| TRAF2     | -0.08041 | 0.068252 | 0.127952 | 515 | 515 |
| SFRS13A   | -0.08039 | 0.068332 | 0.128079 | 515 | 515 |
| DNAJC2    | -0.08038 | 0.068344 | 0.128087 | 515 | 515 |
| WDR33     | -0.08037 | 0.068379 | 0.128117 | 515 | 515 |
| MAGEB18   | -0.08037 | 0.068411 | 0.128165 | 515 | 32  |
| BDKRB1    | -0.08036 | 0.068442 | 0.128199 | 515 | 511 |
| ARMC6     | -0.08035 | 0.068452 | 0.128206 | 515 | 515 |
| TRUB1     | -0.08032 | 0.068551 | 0.128355 | 515 | 515 |
| GSTTP1    | -0.08031 | 0.068593 | 0.128423 | 515 | 11  |
| BRD7      | -0.08027 | 0.068724 | 0.128655 | 515 | 515 |
| NCRNA0017 | -0.0802  | 0.068987 | 0.129111 | 515 | 515 |
| RABGAP1   | -0.0802  | 0.068993 | 0.129111 | 515 | 515 |
| RBM28     | -0.08018 | 0.069043 | 0.129181 | 515 | 515 |
| ATP5EP2   | -0.08015 | 0.069166 | 0.129373 | 515 | 515 |
| BAT5      | -0.08013 | 0.069241 | 0.129491 | 515 | 515 |
| KLB       | -0.0801  | 0.069317 | 0.129595 | 515 | 512 |
| EBNA1BP2  | -0.08008 | 0.069412 | 0.129713 | 515 | 515 |
| MTUS2     | -0.08006 | 0.069469 | 0.129795 | 515 | 501 |
| C1orf203  | -0.08004 | 0.069539 | 0.129904 | 515 | 515 |
| LRRC7     | -0.08004 | 0.06954  | 0.129904 | 515 | 253 |
| TRHR      | -0.08003 | 0.069565 | 0.129925 | 515 | 68  |
| ANAPC11   | -0.08002 | 0.069621 | 0.130019 | 515 | 515 |
| SLC30A9   | -0.08    | 0.06968  | 0.130117 | 515 | 515 |
| SPATA5    | -0.07998 | 0.069748 | 0.130226 | 515 | 515 |
| DSCR10    | -0.07998 | 0.069756 | 0.130226 | 515 | 49  |
| SLC24A1   | -0.07998 | 0.069765 | 0.130226 | 515 | 515 |
| CAPN12    | -0.07997 | 0.069778 | 0.130226 | 515 | 515 |
| PTGR1     | -0.07997 | 0.069798 | 0.130243 | 515 | 515 |
| VEGFA     | -0.07997 | 0.0698   | 0.130243 | 515 | 515 |
| PLCE1     | -0.07995 | 0.069849 | 0.130309 | 515 | 515 |
| ZNF681    | -0.07993 | 0.069914 | 0.130395 | 515 | 515 |
| MRPL17    | -0.07984 | 0.070255 | 0.130971 | 515 | 515 |
| PLEKHJ1   | -0.07984 | 0.070256 | 0.130971 | 515 | 515 |
| LOC100132 | -0.07982 | 0.070306 | 0.13104  | 515 | 349 |
| SYBU      | -0.07981 | 0.07036  | 0.131104 | 515 | 515 |
| RP9P      | -0.07978 | 0.070464 | 0.131254 | 515 | 515 |
| LRRC27    | -0.07973 | 0.070629 | 0.131447 | 515 | 515 |
| ZNF395    | -0.07972 | 0.07065  | 0.131473 | 515 | 515 |
| NYX       | -0.0797  | 0.070726 | 0.131589 | 515 | 102 |

|           |          |          |          |     |     |
|-----------|----------|----------|----------|-----|-----|
| RTEL1     | -0.0797  | 0.07074  | 0.131597 | 515 | 515 |
| FOXA2     | -0.07969 | 0.070758 | 0.131612 | 515 | 513 |
| C1orf104  | -0.07966 | 0.070881 | 0.131829 | 515 | 515 |
| BHLHB9    | -0.07964 | 0.070942 | 0.131931 | 515 | 515 |
| LOC440356 | -0.07964 | 0.070959 | 0.13195  | 515 | 402 |
| C4orf10   | -0.07963 | 0.070986 | 0.131978 | 515 | 515 |
| MALL      | -0.07963 | 0.070987 | 0.131978 | 515 | 515 |
| PCDHGA7   | -0.07961 | 0.071064 | 0.132096 | 515 | 512 |
| KLRG2     | -0.0796  | 0.071097 | 0.132146 | 515 | 493 |
| TTC8      | -0.07958 | 0.071151 | 0.132226 | 515 | 515 |
| MIB1      | -0.07958 | 0.071154 | 0.132226 | 515 | 515 |
| CLCN6     | -0.07955 | 0.071257 | 0.132394 | 515 | 515 |
| RARA      | -0.07954 | 0.071297 | 0.132443 | 515 | 515 |
| KIAA1267  | -0.07948 | 0.07151  | 0.132825 | 515 | 515 |
| CREB3L2   | -0.07948 | 0.071524 | 0.13284  | 515 | 515 |
| AGPAT2    | -0.07945 | 0.071614 | 0.132983 | 515 | 515 |
| ALPPL2    | -0.07943 | 0.07169  | 0.133098 | 515 | 441 |
| DDX41     | -0.07938 | 0.071867 | 0.13339  | 515 | 515 |
| ZDHHC7    | -0.07931 | 0.072119 | 0.133796 | 515 | 515 |
| C6orf52   | -0.07929 | 0.072188 | 0.133912 | 515 | 501 |
| SERF1A    | -0.07929 | 0.0722   | 0.133921 | 515 | 515 |
| ARPC1A    | -0.07928 | 0.072232 | 0.133953 | 515 | 515 |
| FNDC5     | -0.07925 | 0.072352 | 0.13414  | 515 | 515 |
| PLCB1     | -0.07921 | 0.072496 | 0.13435  | 515 | 515 |
| WDR89     | -0.07921 | 0.072498 | 0.13435  | 515 | 515 |
| RBM42     | -0.07918 | 0.07259  | 0.134496 | 515 | 515 |
| PRDM15    | -0.07916 | 0.072666 | 0.134611 | 515 | 515 |
| OGDH      | -0.07915 | 0.072704 | 0.134668 | 515 | 515 |
| B3GALT1   | -0.07908 | 0.072968 | 0.135095 | 515 | 330 |
| MRPL46    | -0.07907 | 0.073006 | 0.135153 | 515 | 515 |
| USP34     | -0.07903 | 0.073162 | 0.135404 | 515 | 515 |
| SLC22A24  | -0.07894 | 0.073475 | 0.135883 | 515 | 11  |
| LOC100271 | -0.07891 | 0.073582 | 0.136056 | 515 | 515 |
| ZNF330    | -0.07889 | 0.073657 | 0.136157 | 515 | 515 |
| C1orf159  | -0.0788  | 0.073993 | 0.136674 | 515 | 515 |
| C3orf30   | -0.07875 | 0.074162 | 0.136937 | 515 | 304 |
| TPD52L1   | -0.07874 | 0.074212 | 0.137017 | 515 | 515 |
| USE1      | -0.07873 | 0.074256 | 0.13705  | 515 | 515 |
| ITFG1     | -0.0787  | 0.07434  | 0.13719  | 515 | 515 |
| CBX5      | -0.07869 | 0.074376 | 0.137232 | 515 | 515 |
| NR4A1     | -0.07868 | 0.074445 | 0.137346 | 515 | 515 |
| KDM5C     | -0.07863 | 0.074606 | 0.137605 | 515 | 515 |
| MUC4      | -0.07859 | 0.074768 | 0.137865 | 515 | 515 |
| GRPEL1    | -0.07857 | 0.074844 | 0.137992 | 515 | 515 |
| POLG2     | -0.07856 | 0.07486  | 0.13801  | 515 | 515 |
| ZBED3     | -0.07855 | 0.0749   | 0.138071 | 515 | 514 |
| IRAK1     | -0.07854 | 0.074944 | 0.138128 | 515 | 515 |
| FADS1     | -0.07854 | 0.074945 | 0.138128 | 515 | 515 |
| HRG       | -0.07853 | 0.075001 | 0.138203 | 515 | 281 |
| CPT1A     | -0.07853 | 0.075002 | 0.138203 | 515 | 515 |
| SHBG      | -0.07852 | 0.075007 | 0.138203 | 515 | 477 |
| ZNF784    | -0.07848 | 0.075189 | 0.138476 | 515 | 515 |
| CBLC      | -0.07846 | 0.075228 | 0.138535 | 515 | 515 |
| GAGE8     | -0.07846 | 0.075246 | 0.138555 | 515 | 54  |

|           |          |          |          |     |     |
|-----------|----------|----------|----------|-----|-----|
| RSF1      | -0.07845 | 0.075288 | 0.13862  | 515 | 515 |
| C21orf33  | -0.07841 | 0.075449 | 0.138904 | 515 | 515 |
| POU5F1B   | -0.07839 | 0.075519 | 0.139019 | 515 | 502 |
| PPP1CB    | -0.07838 | 0.075555 | 0.139074 | 515 | 515 |
| IAPP      | -0.07832 | 0.075775 | 0.139439 | 515 | 127 |
| GCKR      | -0.07823 | 0.076107 | 0.14     | 515 | 429 |
| TRIM9     | -0.07822 | 0.076134 | 0.140035 | 515 | 513 |
| GLB1L2    | -0.07822 | 0.076164 | 0.140078 | 515 | 515 |
| TBC1D14   | -0.07821 | 0.07619  | 0.140113 | 515 | 515 |
| SPNS1     | -0.07819 | 0.076245 | 0.140201 | 515 | 515 |
| SPEM1     | -0.07815 | 0.076413 | 0.14047  | 515 | 102 |
| CLDN8     | -0.07812 | 0.076519 | 0.140639 | 515 | 477 |
| CRY1      | -0.07811 | 0.076556 | 0.140696 | 515 | 515 |
| GAGE12D   | -0.07809 | 0.076625 | 0.14081  | 515 | 80  |
| PTMA      | -0.07805 | 0.076775 | 0.141058 | 515 | 515 |
| SCAMP2    | -0.07803 | 0.076856 | 0.141169 | 515 | 515 |
| C19orf39  | -0.07798 | 0.077042 | 0.141457 | 515 | 515 |
| C7orf68   | -0.07792 | 0.077289 | 0.141885 | 515 | 515 |
| TOM1L1    | -0.07791 | 0.077303 | 0.141885 | 515 | 515 |
| RB1CC1    | -0.0779  | 0.077352 | 0.141962 | 515 | 515 |
| MKRN1     | -0.07787 | 0.077486 | 0.142195 | 515 | 515 |
| LPIN3     | -0.07785 | 0.077542 | 0.14226  | 515 | 515 |
| ZNF323    | -0.07784 | 0.077604 | 0.14232  | 515 | 515 |
| SLC30A5   | -0.07782 | 0.077663 | 0.142403 | 515 | 515 |
| FXYD3     | -0.07778 | 0.077836 | 0.142679 | 515 | 514 |
| LOC729375 | -0.07777 | 0.077872 | 0.142713 | 515 | 515 |
| OR6V1     | -0.07775 | 0.077921 | 0.142784 | 515 | 9   |
| LYPD4     | -0.07768 | 0.078192 | 0.143214 | 515 | 119 |
| DDHD2     | -0.07768 | 0.078214 | 0.143243 | 515 | 515 |
| ABCD3     | -0.07764 | 0.078353 | 0.143457 | 515 | 515 |
| AATK      | -0.07755 | 0.078714 | 0.144092 | 515 | 515 |
| C13orf1   | -0.07754 | 0.078747 | 0.144126 | 515 | 515 |
| EPS8L3    | -0.07745 | 0.079084 | 0.144677 | 515 | 309 |
| SCOC      | -0.07744 | 0.079123 | 0.144708 | 515 | 515 |
| PFDN4     | -0.07742 | 0.079199 | 0.14482  | 515 | 515 |
| SLC39A5   | -0.07733 | 0.079564 | 0.145368 | 515 | 410 |
| RAE1      | -0.07732 | 0.079597 | 0.145414 | 515 | 515 |
| GIGYF1    | -0.07731 | 0.079644 | 0.145475 | 515 | 515 |
| PLAC4     | -0.07727 | 0.079806 | 0.145716 | 515 | 477 |
| PAGE1     | -0.07726 | 0.079848 | 0.145767 | 515 | 106 |
| LOC284023 | -0.07723 | 0.079937 | 0.145889 | 515 | 515 |
| STRAP     | -0.07722 | 0.079988 | 0.145969 | 515 | 515 |
| NUP214    | -0.07722 | 0.08     | 0.145977 | 515 | 515 |
| DACH2     | -0.07718 | 0.080156 | 0.146222 | 515 | 304 |
| GOLGA6L5  | -0.07717 | 0.080171 | 0.146236 | 515 | 515 |
| ADAD1     | -0.07717 | 0.080193 | 0.14625  | 515 | 21  |
| RBM39     | -0.07716 | 0.080222 | 0.146276 | 515 | 515 |
| PRPF4B    | -0.07713 | 0.080334 | 0.146441 | 515 | 515 |
| C21orf71  | -0.07713 | 0.080353 | 0.146461 | 515 | 393 |
| UBE3A     | -0.07712 | 0.080361 | 0.146463 | 515 | 515 |
| ZBTB44    | -0.07709 | 0.08049  | 0.146672 | 515 | 515 |
| LMAN1     | -0.07704 | 0.080694 | 0.147004 | 515 | 515 |
| LRRC23    | -0.07704 | 0.080695 | 0.147004 | 515 | 515 |
| C2CD4B    | -0.07703 | 0.080745 | 0.147068 | 515 | 515 |

|           |          |          |          |     |     |
|-----------|----------|----------|----------|-----|-----|
| MZF1      | -0.07699 | 0.080886 | 0.147261 | 515 | 515 |
| DLX5      | -0.07699 | 0.080887 | 0.147261 | 515 | 504 |
| C21orf58  | -0.07699 | 0.080895 | 0.147261 | 515 | 515 |
| TMEM85    | -0.07698 | 0.080915 | 0.147283 | 515 | 515 |
| PLD6      | -0.07698 | 0.080922 | 0.147283 | 515 | 515 |
| CNTNAP5   | -0.07695 | 0.081056 | 0.14749  | 515 | 118 |
| PGAM2     | -0.07694 | 0.081082 | 0.147521 | 515 | 514 |
| TMEM44    | -0.07692 | 0.081154 | 0.147639 | 515 | 515 |
| EFCAB3    | -0.07688 | 0.081317 | 0.147895 | 515 | 292 |
| VPS37B    | -0.07688 | 0.081339 | 0.147921 | 515 | 515 |
| LOC283267 | -0.07686 | 0.081406 | 0.148016 | 515 | 515 |
| NAA25     | -0.07685 | 0.081447 | 0.148063 | 515 | 515 |
| NSF       | -0.07684 | 0.081494 | 0.148135 | 515 | 515 |
| ZDHHC23   | -0.07682 | 0.08156  | 0.148242 | 515 | 515 |
| NME2      | -0.07678 | 0.081739 | 0.148555 | 515 | 515 |
| EIF4EBP2  | -0.07675 | 0.081849 | 0.148727 | 515 | 515 |
| EIF2S2    | -0.07674 | 0.081896 | 0.148799 | 515 | 515 |
| FAM50B    | -0.07672 | 0.08196  | 0.148901 | 515 | 515 |
| SOX14     | -0.07671 | 0.082005 | 0.148956 | 515 | 138 |
| PORCN     | -0.07668 | 0.082134 | 0.149149 | 515 | 515 |
| ACADSB    | -0.07667 | 0.082151 | 0.149168 | 515 | 515 |
| NCRNA0008 | -0.07665 | 0.082235 | 0.14928  | 515 | 515 |
| TMEM135   | -0.07662 | 0.08236  | 0.149493 | 515 | 515 |
| CLIC6     | -0.07661 | 0.082388 | 0.149528 | 515 | 515 |
| KIF22     | -0.0766  | 0.082463 | 0.149639 | 515 | 515 |
| KIT       | -0.07657 | 0.082561 | 0.149777 | 515 | 515 |
| HOXC8     | -0.07653 | 0.082734 | 0.150073 | 515 | 467 |
| OR2A7     | -0.07653 | 0.08274  | 0.150073 | 515 | 514 |
| TET3      | -0.07651 | 0.082811 | 0.150175 | 515 | 515 |
| VGFB      | -0.0765  | 0.082844 | 0.150207 | 515 | 498 |
| SUPT5H    | -0.07648 | 0.082912 | 0.150262 | 515 | 515 |
| OCLN      | -0.07648 | 0.082947 | 0.150286 | 515 | 515 |
| HIST1H4D  | -0.07646 | 0.082998 | 0.150351 | 515 | 283 |
| HTR1A     | -0.07644 | 0.083075 | 0.150462 | 515 | 32  |
| EIF3C     | -0.07643 | 0.08315  | 0.150584 | 515 | 509 |
| PBRM1     | -0.07642 | 0.083183 | 0.150625 | 515 | 515 |
| FOXD3     | -0.07641 | 0.083197 | 0.150628 | 515 | 384 |
| LOC64933C | -0.0764  | 0.083252 | 0.150714 | 515 | 515 |
| LIN9      | -0.07638 | 0.083343 | 0.150852 | 515 | 515 |
| APOO      | -0.07633 | 0.083553 | 0.151206 | 515 | 515 |
| NT5C3L    | -0.07632 | 0.083582 | 0.151243 | 515 | 515 |
| METT5D1   | -0.07632 | 0.083593 | 0.15125  | 515 | 515 |
| SUPT16H   | -0.0763  | 0.083668 | 0.151373 | 515 | 515 |
| NFE2      | -0.07628 | 0.083753 | 0.151498 | 515 | 514 |
| HNRNPAB   | -0.07627 | 0.083771 | 0.151518 | 515 | 515 |
| TMEM131   | -0.07626 | 0.083835 | 0.151615 | 515 | 515 |
| IFRD2     | -0.07626 | 0.08384  | 0.151615 | 515 | 515 |
| TYW1      | -0.07625 | 0.083853 | 0.151624 | 515 | 515 |
| NHSL1     | -0.07624 | 0.0839   | 0.151681 | 515 | 515 |
| EXD2      | -0.07623 | 0.083951 | 0.15176  | 515 | 515 |
| NEUROD1   | -0.0762  | 0.084072 | 0.151952 | 515 | 204 |
| LOC10013C | -0.07614 | 0.084317 | 0.152325 | 515 | 515 |
| TTC27     | -0.07613 | 0.08435  | 0.152371 | 515 | 515 |
| RNF151    | -0.07613 | 0.084361 | 0.152372 | 515 | 183 |

|           |          |          |          |     |     |
|-----------|----------|----------|----------|-----|-----|
| RPL23P8   | -0.0761  | 0.084466 | 0.152525 | 515 | 515 |
| FAM174A   | -0.07609 | 0.084526 | 0.152593 | 515 | 515 |
| GUCY1B2   | -0.07606 | 0.084655 | 0.152798 | 515 | 505 |
| LOC643486 | -0.07603 | 0.084747 | 0.15295  | 515 | 78  |
| MEX3B     | -0.07595 | 0.085095 | 0.153523 | 515 | 515 |
| MST1P2    | -0.07592 | 0.085215 | 0.153669 | 515 | 515 |
| C14orf39  | -0.07589 | 0.085353 | 0.153864 | 515 | 363 |
| SIL1      | -0.07585 | 0.085515 | 0.154114 | 515 | 515 |
| RPL19P12  | -0.07585 | 0.085524 | 0.154116 | 515 | 515 |
| SMURF1    | -0.07583 | 0.085582 | 0.154148 | 515 | 515 |
| TCHHL1    | -0.07583 | 0.085588 | 0.154148 | 515 | 91  |
| ERC1      | -0.07581 | 0.085667 | 0.154262 | 515 | 515 |
| LOC728640 | -0.07579 | 0.08574  | 0.154357 | 515 | 515 |
| UGT3A1    | -0.07579 | 0.085743 | 0.154357 | 515 | 187 |
| KDM4B     | -0.07578 | 0.085788 | 0.154406 | 515 | 515 |
| KRT33A    | -0.07578 | 0.085793 | 0.154406 | 515 | 36  |
| OBP2A     | -0.07575 | 0.085919 | 0.154605 | 515 | 264 |
| TRAPPC4   | -0.07572 | 0.086059 | 0.154802 | 515 | 515 |
| CCDC157   | -0.07565 | 0.086343 | 0.155244 | 515 | 514 |
| AKAP9     | -0.07558 | 0.086613 | 0.155671 | 515 | 515 |
| PHB       | -0.07552 | 0.086862 | 0.156034 | 515 | 515 |
| OPRD1     | -0.0755  | 0.086958 | 0.156178 | 515 | 137 |
| DNAJC28   | -0.07549 | 0.086991 | 0.156197 | 515 | 515 |
| PPIL1     | -0.07549 | 0.087007 | 0.156211 | 515 | 515 |
| GPR89C    | -0.07548 | 0.087026 | 0.156232 | 515 | 515 |
| CUEDC2    | -0.07543 | 0.087236 | 0.156566 | 515 | 515 |
| C17orf73  | -0.07539 | 0.087416 | 0.156833 | 515 | 154 |
| FAM63A    | -0.07534 | 0.087615 | 0.157148 | 515 | 515 |
| PCGF1     | -0.07533 | 0.087682 | 0.157253 | 515 | 515 |
| CBLN1     | -0.07528 | 0.087908 | 0.157616 | 515 | 393 |
| ZNF554    | -0.07526 | 0.087984 | 0.157724 | 515 | 515 |
| RELA      | -0.07524 | 0.088078 | 0.157879 | 515 | 515 |
| KRTAP19-5 | -0.07523 | 0.088097 | 0.157898 | 515 | 6   |
| SUGT1     | -0.07522 | 0.088144 | 0.157955 | 515 | 515 |
| PAK3      | -0.0752  | 0.088232 | 0.158084 | 515 | 471 |
| C15orf23  | -0.07519 | 0.088261 | 0.158121 | 515 | 515 |
| GRWD1     | -0.07515 | 0.088436 | 0.158407 | 515 | 515 |
| ALPK3     | -0.07514 | 0.088469 | 0.158452 | 515 | 515 |
| OR4A47    | -0.07514 | 0.088494 | 0.158468 | 515 | 12  |
| MAMDC4    | -0.07513 | 0.088534 | 0.158511 | 515 | 515 |
| COQ4      | -0.07511 | 0.088621 | 0.158652 | 515 | 515 |
| PPAN      | -0.07508 | 0.088738 | 0.158799 | 515 | 515 |
| PRR23A    | -0.07508 | 0.088743 | 0.158799 | 515 | 9   |
| POLE      | -0.07504 | 0.088914 | 0.159077 | 515 | 515 |
| NXPH4     | -0.07503 | 0.088952 | 0.159131 | 515 | 514 |
| BTBD16    | -0.07499 | 0.089119 | 0.159402 | 515 | 451 |
| G6PC2     | -0.07498 | 0.08915  | 0.159442 | 515 | 173 |
| C8orf33   | -0.07498 | 0.089181 | 0.159469 | 515 | 515 |
| FAM131C   | -0.07496 | 0.089241 | 0.159563 | 515 | 455 |
| TMEM147   | -0.07495 | 0.089308 | 0.159668 | 515 | 515 |
| ETFDH     | -0.07494 | 0.089344 | 0.159717 | 515 | 515 |
| SUMO1P3   | -0.07489 | 0.08955  | 0.16003  | 515 | 515 |
| TMEM84    | -0.07489 | 0.089562 | 0.160036 | 515 | 437 |
| LRRTM4    | -0.07487 | 0.089638 | 0.160158 | 515 | 426 |

|           |          |          |          |     |     |
|-----------|----------|----------|----------|-----|-----|
| PLEKHB1   | -0.07486 | 0.089692 | 0.160229 | 515 | 515 |
| ZNF580    | -0.07482 | 0.089835 | 0.160466 | 515 | 515 |
| BIK       | -0.07482 | 0.089872 | 0.160518 | 515 | 515 |
| C3orf18   | -0.07478 | 0.090028 | 0.160769 | 515 | 515 |
| BPY2      | -0.07472 | 0.090287 | 0.161202 | 515 | 20  |
| QSOX1     | -0.07471 | 0.090314 | 0.161236 | 515 | 515 |
| HILS1     | -0.07471 | 0.090336 | 0.161261 | 515 | 208 |
| INTS4L1   | -0.07467 | 0.090516 | 0.16151  | 515 | 515 |
| ASH2L     | -0.07466 | 0.090539 | 0.161537 | 515 | 515 |
| LOC150776 | -0.07463 | 0.090674 | 0.161756 | 515 | 515 |
| DNTTIP2   | -0.07463 | 0.090678 | 0.161756 | 515 | 515 |
| COIL      | -0.07459 | 0.090844 | 0.162037 | 515 | 515 |
| RNF126P1  | -0.07457 | 0.090917 | 0.162144 | 515 | 490 |
| AQP6      | -0.07457 | 0.09092  | 0.162144 | 515 | 481 |
| LHX8      | -0.07455 | 0.091023 | 0.162313 | 515 | 170 |
| VPS13D    | -0.07453 | 0.091099 | 0.162412 | 515 | 515 |
| PIGC      | -0.07453 | 0.0911   | 0.162412 | 515 | 515 |
| FAM166A   | -0.07453 | 0.091111 | 0.162412 | 515 | 327 |
| INTS4L2   | -0.07445 | 0.091452 | 0.162963 | 515 | 514 |
| C4orf23   | -0.07444 | 0.091513 | 0.163057 | 515 | 515 |
| AKAP8L    | -0.07442 | 0.091579 | 0.163158 | 515 | 515 |
| RBM23     | -0.07441 | 0.091633 | 0.16324  | 515 | 515 |
| TCEA3     | -0.07441 | 0.091644 | 0.163242 | 515 | 515 |
| DOCK9     | -0.07439 | 0.0917   | 0.163302 | 515 | 515 |
| ACTL7B    | -0.07434 | 0.091919 | 0.163648 | 515 | 131 |
| CLDN23    | -0.07433 | 0.091981 | 0.16373  | 515 | 515 |
| SCRT1     | -0.07431 | 0.09206  | 0.16384  | 515 | 348 |
| BSND      | -0.07428 | 0.092204 | 0.164053 | 515 | 276 |
| C11orf57  | -0.07427 | 0.092234 | 0.164088 | 515 | 515 |
| FBXO28    | -0.07425 | 0.09231  | 0.164165 | 515 | 515 |
| MRPL14    | -0.07425 | 0.092319 | 0.164165 | 515 | 515 |
| SNRPB     | -0.07425 | 0.092324 | 0.164165 | 515 | 515 |
| THAP9     | -0.07424 | 0.092366 | 0.164224 | 515 | 515 |
| SNORA76   | -0.07424 | 0.092383 | 0.16424  | 515 | 140 |
| C12orf39  | -0.07423 | 0.0924   | 0.164257 | 515 | 241 |
| LDB1      | -0.07422 | 0.092474 | 0.164373 | 515 | 515 |
| BMP8B     | -0.07421 | 0.092487 | 0.164381 | 515 | 515 |
| LDLRAD2   | -0.0742  | 0.092562 | 0.164471 | 515 | 515 |
| VPS24     | -0.07418 | 0.092623 | 0.164564 | 515 | 515 |
| DNAJC5G   | -0.07415 | 0.092752 | 0.164749 | 515 | 177 |
| RDH13     | -0.07414 | 0.092835 | 0.164882 | 515 | 515 |
| MYST2     | -0.07413 | 0.092843 | 0.164882 | 515 | 515 |
| GAGE13    | -0.07413 | 0.092864 | 0.164899 | 515 | 32  |
| CEBPZ     | -0.07412 | 0.092901 | 0.164941 | 515 | 515 |
| BIRC8     | -0.07412 | 0.092913 | 0.164947 | 515 | 4   |
| PAWR      | -0.07406 | 0.093158 | 0.165353 | 515 | 515 |
| OTOP3     | -0.07406 | 0.093186 | 0.165377 | 515 | 62  |
| POLR2L    | -0.07406 | 0.093188 | 0.165377 | 515 | 515 |
| TAPT1     | -0.07405 | 0.093222 | 0.165422 | 515 | 515 |
| DEFB131   | -0.07404 | 0.093273 | 0.165499 | 515 | 18  |
| C21orf56  | -0.07402 | 0.093352 | 0.165576 | 515 | 514 |
| H2AFX     | -0.07402 | 0.093358 | 0.165576 | 515 | 515 |
| RAB10     | -0.074   | 0.09343  | 0.165674 | 515 | 515 |
| PSMD3     | -0.07399 | 0.093498 | 0.16578  | 515 | 515 |

|           |          |          |          |     |     |
|-----------|----------|----------|----------|-----|-----|
| OVOL1     | -0.07396 | 0.093597 | 0.165926 | 515 | 514 |
| OXT       | -0.07394 | 0.093689 | 0.166075 | 515 | 324 |
| HIST1H3B  | -0.07393 | 0.093767 | 0.166184 | 515 | 329 |
| PRR14     | -0.07392 | 0.093779 | 0.16619  | 515 | 515 |
| CMPK1     | -0.07388 | 0.093958 | 0.166493 | 515 | 515 |
| ZP3       | -0.07387 | 0.093998 | 0.166548 | 515 | 515 |
| ATP5J2    | -0.07377 | 0.094443 | 0.167262 | 515 | 515 |
| TRIM17    | -0.07376 | 0.094527 | 0.167397 | 515 | 513 |
| DGUOK     | -0.07375 | 0.094539 | 0.167404 | 515 | 515 |
| MGST3     | -0.07372 | 0.094684 | 0.1676   | 515 | 515 |
| ZNF740    | -0.07372 | 0.094695 | 0.167604 | 515 | 515 |
| PABPC1L2A | -0.07371 | 0.094713 | 0.167623 | 515 | 74  |
| HIST1H2AK | -0.07368 | 0.094852 | 0.167824 | 515 | 481 |
| NACC1     | -0.07367 | 0.094911 | 0.167913 | 515 | 515 |
| OPRK1     | -0.07366 | 0.094933 | 0.167923 | 515 | 389 |
| TSG1      | -0.07366 | 0.094974 | 0.167981 | 515 | 101 |
| DLST      | -0.07364 | 0.095027 | 0.168058 | 515 | 515 |
| EBAG9     | -0.07356 | 0.095401 | 0.16869  | 515 | 515 |
| C5orf47   | -0.07355 | 0.095456 | 0.168774 | 515 | 343 |
| STAP2     | -0.07354 | 0.095499 | 0.168825 | 515 | 515 |
| ANAPC16   | -0.07353 | 0.095559 | 0.168893 | 515 | 515 |
| RGNEF     | -0.07352 | 0.095575 | 0.168893 | 515 | 515 |
| DCDC2     | -0.07351 | 0.095619 | 0.168956 | 515 | 512 |
| KRTAP5-7  | -0.07351 | 0.095627 | 0.168956 | 515 | 238 |
| C8orf83   | -0.07351 | 0.095642 | 0.168967 | 515 | 515 |
| GPRC6A    | -0.07351 | 0.095653 | 0.168971 | 515 | 145 |
| MSH2      | -0.07349 | 0.095701 | 0.169041 | 515 | 515 |
| CES2      | -0.07345 | 0.095916 | 0.16939  | 515 | 515 |
| SSX6      | -0.07341 | 0.096074 | 0.16964  | 515 | 224 |
| ZC3H7B    | -0.07334 | 0.09639  | 0.170125 | 515 | 515 |
| SMC3      | -0.07334 | 0.096391 | 0.170125 | 515 | 515 |
| SF3A2     | -0.07328 | 0.096662 | 0.170558 | 515 | 515 |
| LOC154449 | -0.07327 | 0.096701 | 0.17061  | 515 | 31  |
| FABP1     | -0.07327 | 0.096709 | 0.17061  | 515 | 120 |
| TUBGCP2   | -0.07324 | 0.096855 | 0.170853 | 515 | 515 |
| MAFA      | -0.07324 | 0.096878 | 0.170863 | 515 | 237 |
| GJA9      | -0.07323 | 0.096918 | 0.17092  | 515 | 514 |
| SST       | -0.07322 | 0.096936 | 0.170936 | 515 | 223 |
| TASP1     | -0.07319 | 0.097101 | 0.171196 | 515 | 515 |
| ACBD5     | -0.07317 | 0.097192 | 0.171327 | 515 | 515 |
| ELP3      | -0.07316 | 0.09723  | 0.171379 | 515 | 515 |
| CLDN4     | -0.07314 | 0.097324 | 0.171514 | 515 | 515 |
| RPGRIP1L  | -0.07309 | 0.097528 | 0.171859 | 515 | 515 |
| GIP       | -0.07308 | 0.097579 | 0.171925 | 515 | 145 |
| GLB1      | -0.07308 | 0.097604 | 0.171946 | 515 | 515 |
| SCP2      | -0.07302 | 0.09786  | 0.172368 | 515 | 515 |
| RPLP0     | -0.07301 | 0.097913 | 0.172445 | 515 | 515 |
| ZNF318    | -0.073   | 0.097946 | 0.172489 | 515 | 515 |
| SS18      | -0.07299 | 0.097993 | 0.172555 | 515 | 515 |
| FAM186A   | -0.07296 | 0.098149 | 0.17277  | 515 | 505 |
| PABPC1L2E | -0.07294 | 0.098229 | 0.172864 | 515 | 113 |
| HNRNPF    | -0.07294 | 0.098257 | 0.1729   | 515 | 515 |
| CALR3     | -0.07291 | 0.098363 | 0.173028 | 515 | 286 |
| PPY       | -0.07291 | 0.098365 | 0.173028 | 515 | 59  |



|           |          |          |          |     |     |
|-----------|----------|----------|----------|-----|-----|
| DDX19A    | -0.07291 | 0.098397 | 0.17307  | 515 | 515 |
| TPMT      | -0.0729  | 0.098424 | 0.173102 | 515 | 515 |
| TXLNA     | -0.07289 | 0.098481 | 0.173186 | 515 | 515 |
| ZNF280B   | -0.07287 | 0.098562 | 0.173299 | 515 | 515 |
| CBWD2     | -0.07286 | 0.098625 | 0.173394 | 515 | 515 |
| F3        | -0.07283 | 0.098744 | 0.173572 | 515 | 515 |
| CD276     | -0.07281 | 0.098847 | 0.173723 | 515 | 515 |
| LGALS7B   | -0.0728  | 0.098874 | 0.173747 | 515 | 394 |
| RAET1G    | -0.07279 | 0.098916 | 0.173798 | 515 | 506 |
| CALML3    | -0.07278 | 0.098966 | 0.17384  | 515 | 393 |
| ARSD      | -0.07276 | 0.099054 | 0.173947 | 515 | 515 |
| ISPD      | -0.07276 | 0.099061 | 0.173947 | 515 | 515 |
| TMC7      | -0.07275 | 0.09913  | 0.173997 | 515 | 515 |
| ARHGDIG   | -0.07275 | 0.099133 | 0.173997 | 515 | 337 |
| C19orf30  | -0.07272 | 0.099251 | 0.174189 | 515 | 59  |
| NTN3      | -0.0727  | 0.099331 | 0.174293 | 515 | 390 |
| AASDHPPT  | -0.0727  | 0.099337 | 0.174293 | 515 | 515 |
| TPRA1     | -0.0727  | 0.099337 | 0.174293 | 515 | 515 |
| MAGEB2    | -0.07264 | 0.099612 | 0.174719 | 515 | 212 |
| FAM171A2  | -0.07264 | 0.099615 | 0.174719 | 515 | 513 |
| IDH3G     | -0.07264 | 0.099629 | 0.174729 | 515 | 515 |
| KREMEN1   | -0.07264 | 0.099639 | 0.174732 | 515 | 515 |
| PARD6B    | -0.07262 | 0.09974  | 0.174893 | 515 | 515 |
| TBX15     | -0.0726  | 0.0998   | 0.174982 | 515 | 514 |
| GIPC1     | -0.07259 | 0.099849 | 0.175053 | 515 | 515 |
| RANBP2    | -0.07258 | 0.09991  | 0.175143 | 515 | 515 |
| TRIM13    | -0.07258 | 0.099918 | 0.175143 | 515 | 515 |
| FLJ35776  | -0.07255 | 0.100035 | 0.175302 | 515 | 515 |
| MEX3D     | -0.07255 | 0.100069 | 0.175347 | 515 | 515 |
| MAP1LC3A  | -0.07254 | 0.100087 | 0.175363 | 515 | 515 |
| OR2B6     | -0.07251 | 0.100227 | 0.175577 | 515 | 347 |
| MYH10     | -0.0725  | 0.100274 | 0.175628 | 515 | 515 |
| ZNF770    | -0.07249 | 0.100329 | 0.175694 | 515 | 515 |
| PDE11A    | -0.07247 | 0.100414 | 0.175813 | 515 | 501 |
| UBTFL1    | -0.07244 | 0.10055  | 0.176019 | 515 | 33  |
| CD24      | -0.07241 | 0.100703 | 0.176217 | 515 | 515 |
| SRY       | -0.0724  | 0.100741 | 0.176261 | 515 | 65  |
| DYNLL1    | -0.07235 | 0.101001 | 0.17667  | 515 | 515 |
| RANBP1    | -0.07225 | 0.101464 | 0.177402 | 515 | 515 |
| SYF2      | -0.07224 | 0.101497 | 0.177444 | 515 | 515 |
| CRELD2    | -0.07224 | 0.101533 | 0.177491 | 515 | 515 |
| SPDYE3    | -0.07222 | 0.10159  | 0.177576 | 515 | 515 |
| KRT28     | -0.07215 | 0.101939 | 0.178139 | 515 | 41  |
| TMEM143   | -0.07214 | 0.102001 | 0.178201 | 515 | 515 |
| RPL11     | -0.07213 | 0.102045 | 0.178263 | 515 | 515 |
| CYCSP52   | -0.07212 | 0.102086 | 0.178303 | 515 | 146 |
| RRN3      | -0.07211 | 0.102131 | 0.178366 | 515 | 515 |
| ESCO1     | -0.07206 | 0.102384 | 0.17873  | 515 | 515 |
| DNA2      | -0.072   | 0.102667 | 0.179166 | 515 | 515 |
| INF2      | -0.072   | 0.10267  | 0.179166 | 515 | 515 |
| LARGE     | -0.07199 | 0.102722 | 0.179226 | 515 | 515 |
| TRIM42    | -0.07197 | 0.102806 | 0.179345 | 515 | 11  |
| RMST      | -0.07197 | 0.102808 | 0.179345 | 515 | 249 |
| NCRNA002C | -0.07195 | 0.102897 | 0.179411 | 515 | 515 |

|           |          |          |          |     |     |
|-----------|----------|----------|----------|-----|-----|
| CIB1      | -0.07195 | 0.1029   | 0.179411 | 515 | 515 |
| C14orf68  | -0.07195 | 0.102909 | 0.179411 | 515 | 292 |
| FLJ25363  | -0.07194 | 0.102964 | 0.179492 | 515 | 42  |
| PYGB      | -0.07188 | 0.103231 | 0.179909 | 515 | 515 |
| FBX042    | -0.07186 | 0.103346 | 0.180095 | 515 | 515 |
| ABO       | -0.07184 | 0.103436 | 0.18022  | 515 | 511 |
| SPRED2    | -0.07183 | 0.1035   | 0.180316 | 515 | 515 |
| HMGCR     | -0.07182 | 0.103544 | 0.180376 | 515 | 515 |
| POLR1B    | -0.07181 | 0.103585 | 0.180431 | 515 | 515 |
| GBX1      | -0.07179 | 0.103651 | 0.180499 | 515 | 142 |
| C1orf128  | -0.07178 | 0.103717 | 0.180583 | 515 | 515 |
| ERN2      | -0.07176 | 0.103823 | 0.180753 | 515 | 498 |
| ZNF691    | -0.07168 | 0.104224 | 0.181386 | 515 | 515 |
| RPS21     | -0.07167 | 0.104237 | 0.181394 | 515 | 515 |
| C14orf153 | -0.07165 | 0.104357 | 0.181571 | 515 | 515 |
| SIAH1     | -0.07163 | 0.104454 | 0.181676 | 515 | 515 |
| EP400     | -0.0716  | 0.104567 | 0.181857 | 515 | 515 |
| PAK1IP1   | -0.07159 | 0.104632 | 0.181942 | 515 | 515 |
| ZNF396    | -0.07159 | 0.104634 | 0.181942 | 515 | 515 |
| MURC      | -0.07158 | 0.10468  | 0.182007 | 515 | 515 |
| C4orf6    | -0.07158 | 0.104706 | 0.182027 | 515 | 313 |
| FLJ42393  | -0.07158 | 0.10471  | 0.182027 | 515 | 304 |
| C1orf58   | -0.07156 | 0.104763 | 0.182085 | 515 | 515 |
| ARHGAP12  | -0.07156 | 0.104771 | 0.182085 | 515 | 515 |
| EIF2B1    | -0.07155 | 0.104818 | 0.182135 | 515 | 515 |
| KRBA2     | -0.07153 | 0.10493  | 0.182298 | 515 | 515 |
| MRPS30    | -0.07152 | 0.10499  | 0.182371 | 515 | 515 |
| PLIN1     | -0.07149 | 0.105112 | 0.182535 | 515 | 499 |
| SUGT1L1   | -0.07148 | 0.105175 | 0.182628 | 515 | 515 |
| PTGFRN    | -0.07148 | 0.105195 | 0.182648 | 515 | 515 |
| GOLGB1    | -0.07147 | 0.105223 | 0.18268  | 515 | 515 |
| MTG1      | -0.07146 | 0.105258 | 0.182725 | 515 | 515 |
| SALL2     | -0.07144 | 0.105371 | 0.182905 | 515 | 515 |
| MOSPD1    | -0.07142 | 0.105467 | 0.18304  | 515 | 515 |
| HIST1H2BC | -0.07141 | 0.105534 | 0.183125 | 515 | 515 |
| MLLT11    | -0.0714  | 0.105582 | 0.183176 | 515 | 515 |
| ZNF117    | -0.07139 | 0.105606 | 0.183202 | 515 | 515 |
| RG9MTD2   | -0.07138 | 0.105671 | 0.183298 | 515 | 515 |
| ERMP1     | -0.07137 | 0.105697 | 0.183328 | 515 | 515 |
| TRIM60    | -0.07136 | 0.105745 | 0.183395 | 515 | 7   |
| TMEM56    | -0.07135 | 0.105787 | 0.183452 | 515 | 515 |
| SIX1      | -0.07134 | 0.105873 | 0.183585 | 515 | 515 |
| BTBD12    | -0.07129 | 0.106088 | 0.183881 | 515 | 515 |
| TCEB3     | -0.07129 | 0.10609  | 0.183881 | 515 | 515 |
| C2orf16   | -0.07129 | 0.106108 | 0.183897 | 515 | 515 |
| EXPH5     | -0.07128 | 0.106152 | 0.183942 | 515 | 515 |
| LOC152217 | -0.07123 | 0.106377 | 0.1843   | 515 | 515 |
| CASP2     | -0.07118 | 0.106632 | 0.184694 | 515 | 515 |
| ZNF623    | -0.07114 | 0.106837 | 0.184984 | 515 | 515 |
| PIN1L     | -0.0711  | 0.107039 | 0.185237 | 515 | 353 |
| NLRP5     | -0.07109 | 0.10709  | 0.185278 | 515 | 112 |
| LOC100132 | -0.07103 | 0.107384 | 0.185722 | 515 | 359 |
| TMEM229A  | -0.071   | 0.107547 | 0.185973 | 515 | 338 |
| C14orf104 | -0.07098 | 0.107643 | 0.186122 | 515 | 515 |

|           |          |          |          |     |     |
|-----------|----------|----------|----------|-----|-----|
| BASP1     | -0.07097 | 0.107683 | 0.186158 | 515 | 515 |
| C14orf102 | -0.07094 | 0.107817 | 0.186375 | 515 | 515 |
| CYP2A6    | -0.07091 | 0.107966 | 0.186616 | 515 | 418 |
| PRAMEF1   | -0.0709  | 0.108013 | 0.186665 | 515 | 30  |
| KBTBD11   | -0.0709  | 0.108037 | 0.18667  | 515 | 515 |
| GAS2      | -0.0709  | 0.108042 | 0.18667  | 515 | 513 |
| ACOX3     | -0.07083 | 0.108366 | 0.187177 | 515 | 515 |
| SOLH      | -0.07083 | 0.108378 | 0.187183 | 515 | 515 |
| CALY      | -0.07083 | 0.108392 | 0.187191 | 515 | 310 |
| NDUFA6    | -0.07081 | 0.108467 | 0.187303 | 515 | 515 |
| RECQL4    | -0.07071 | 0.10898  | 0.18802  | 515 | 515 |
| CEACAM18  | -0.07071 | 0.108995 | 0.18802  | 515 | 20  |
| HIST3H3   | -0.0707  | 0.109037 | 0.188076 | 515 | 190 |
| GBX2      | -0.07068 | 0.109112 | 0.18819  | 515 | 295 |
| QTRT1     | -0.07068 | 0.109154 | 0.188246 | 515 | 515 |
| SNF8      | -0.07067 | 0.109192 | 0.188295 | 515 | 515 |
| ZNF496    | -0.07066 | 0.10924  | 0.188362 | 515 | 515 |
| ANO10     | -0.07064 | 0.109327 | 0.188495 | 515 | 515 |
| C19orf22  | -0.07064 | 0.109342 | 0.188505 | 515 | 515 |
| COX7B2    | -0.07058 | 0.109619 | 0.188943 | 515 | 115 |
| SCRN1     | -0.07058 | 0.109649 | 0.18897  | 515 | 515 |
| C1orf157  | -0.07056 | 0.109722 | 0.189062 | 515 | 68  |
| MXD4      | -0.07052 | 0.109937 | 0.189367 | 515 | 515 |
| ZNF341    | -0.07052 | 0.109937 | 0.189367 | 515 | 515 |
| CCDC23    | -0.07052 | 0.109953 | 0.189378 | 515 | 515 |
| PTCD3     | -0.07051 | 0.109972 | 0.189395 | 515 | 515 |
| ABCB8     | -0.07051 | 0.109991 | 0.189412 | 515 | 515 |
| GDF15     | -0.0705  | 0.110051 | 0.189482 | 515 | 515 |
| SPATS2    | -0.07043 | 0.110407 | 0.190079 | 515 | 515 |
| BFAR      | -0.07042 | 0.110457 | 0.190115 | 515 | 515 |
| CTSL2     | -0.07038 | 0.110658 | 0.190412 | 515 | 515 |
| SCN8A     | -0.07037 | 0.110704 | 0.190459 | 515 | 511 |
| OR8D2     | -0.07035 | 0.110798 | 0.190588 | 515 | 19  |
| NEK4      | -0.07032 | 0.110938 | 0.190812 | 515 | 515 |
| ZNF839    | -0.07032 | 0.110968 | 0.190848 | 515 | 515 |
| CYP1A1    | -0.0703  | 0.111046 | 0.190966 | 515 | 343 |
| SILV      | -0.07028 | 0.111155 | 0.191104 | 515 | 515 |
| FTSJ2     | -0.07026 | 0.111242 | 0.191237 | 515 | 515 |
| MPP7      | -0.07023 | 0.111418 | 0.191456 | 515 | 515 |
| CA5BP     | -0.07022 | 0.111463 | 0.191517 | 515 | 515 |
| AFM       | -0.07021 | 0.111526 | 0.191606 | 515 | 67  |
| WDR5      | -0.07021 | 0.111536 | 0.191606 | 515 | 515 |
| COMT      | -0.0702  | 0.111543 | 0.191606 | 515 | 515 |
| NAA30     | -0.07018 | 0.11165  | 0.191757 | 515 | 515 |
| TMEM38A   | -0.07018 | 0.111668 | 0.19177  | 515 | 515 |
| CLSTN1    | -0.07017 | 0.111734 | 0.19185  | 515 | 515 |
| PSMB4     | -0.07013 | 0.111923 | 0.192076 | 515 | 515 |
| PRICKLE3  | -0.07013 | 0.111937 | 0.192085 | 515 | 515 |
| KRAS      | -0.07013 | 0.111948 | 0.192087 | 515 | 515 |
| ADCK1     | -0.0701  | 0.112081 | 0.192249 | 515 | 515 |
| VPS36     | -0.07008 | 0.112164 | 0.192331 | 515 | 515 |
| TCF25     | -0.07008 | 0.112175 | 0.192331 | 515 | 515 |
| GABRA4    | -0.07008 | 0.112181 | 0.192331 | 515 | 122 |
| EIF4G3    | -0.07007 | 0.112235 | 0.192382 | 515 | 515 |

|         |          |          |          |     |     |
|---------|----------|----------|----------|-----|-----|
| TRIP4   | -0.06999 | 0.112645 | 0.193017 | 515 | 515 |
| COX7A2  | -0.06998 | 0.112684 | 0.193057 | 515 | 515 |
| LMAN2   | -0.06996 | 0.112792 | 0.193219 | 515 | 515 |
| CELSR3  | -0.06989 | 0.11315  | 0.193725 | 515 | 515 |
| MKKS    | -0.06988 | 0.113191 | 0.19377  | 515 | 515 |
| YIPF6   | -0.06986 | 0.1133   | 0.193928 | 515 | 515 |
| ENPP4   | -0.06983 | 0.113476 | 0.194191 | 515 | 515 |
| XYLB    | -0.06981 | 0.113551 | 0.194285 | 515 | 515 |
| GUCY2D  | -0.0698  | 0.113615 | 0.194345 | 515 | 501 |
| SPANXE  | -0.0698  | 0.113624 | 0.194345 | 515 | 83  |
| SYN3    | -0.06976 | 0.113812 | 0.194617 | 515 | 493 |
| XPNPEP3 | -0.06975 | 0.113869 | 0.194698 | 515 | 515 |
| LRRC61  | -0.06975 | 0.113893 | 0.194722 | 515 | 515 |
| CHRN2   | -0.06974 | 0.113922 | 0.194753 | 515 | 496 |
| POFUT2  | -0.06974 | 0.113951 | 0.194753 | 515 | 515 |
| MAP2K7  | -0.06974 | 0.113962 | 0.194753 | 515 | 515 |
| MAP4K3  | -0.06973 | 0.11398  | 0.194753 | 515 | 515 |
| ERO1LB  | -0.06969 | 0.114211 | 0.19507  | 515 | 515 |
| RETSAT  | -0.06962 | 0.114589 | 0.195627 | 515 | 515 |
| RPRD1A  | -0.06957 | 0.114839 | 0.19601  | 515 | 515 |
| ANXA9   | -0.06955 | 0.114912 | 0.196112 | 515 | 515 |
| SELO    | -0.06955 | 0.114941 | 0.196144 | 515 | 515 |
| MAP4K2  | -0.06953 | 0.115024 | 0.196236 | 515 | 515 |
| NPAS3   | -0.06948 | 0.115279 | 0.196654 | 515 | 513 |
| GLYATL1 | -0.06946 | 0.11542  | 0.196861 | 515 | 345 |
| CLRN2   | -0.06944 | 0.115487 | 0.196942 | 515 | 22  |
| TIPIN   | -0.06943 | 0.115534 | 0.197006 | 515 | 515 |
| ANG     | -0.06942 | 0.115632 | 0.197139 | 515 | 515 |
| ZNF174  | -0.06941 | 0.115668 | 0.197183 | 515 | 515 |
| PLOD1   | -0.06937 | 0.115862 | 0.197496 | 515 | 515 |
| OTUD5   | -0.06936 | 0.11591  | 0.197563 | 515 | 515 |
| NHP2    | -0.06935 | 0.115956 | 0.197606 | 515 | 515 |
| HEXIM2  | -0.06934 | 0.116017 | 0.197693 | 515 | 515 |
| SULT6B1 | -0.06932 | 0.116116 | 0.197846 | 515 | 16  |
| RAVER2  | -0.0693  | 0.116239 | 0.198021 | 515 | 515 |
| IER3    | -0.06929 | 0.11628  | 0.198074 | 515 | 515 |
| TBC1D12 | -0.06927 | 0.116428 | 0.198293 | 515 | 515 |
| HIF1AN  | -0.06925 | 0.116513 | 0.198421 | 515 | 515 |
| HAX1    | -0.06924 | 0.116542 | 0.198453 | 515 | 515 |
| PPIP5K1 | -0.06924 | 0.116569 | 0.198482 | 515 | 515 |
| AFP     | -0.06923 | 0.116597 | 0.198496 | 515 | 197 |
| DDX11   | -0.06923 | 0.116626 | 0.198512 | 515 | 515 |
| GRHL3   | -0.06921 | 0.116699 | 0.198601 | 515 | 515 |
| OST4    | -0.0692  | 0.116791 | 0.198742 | 515 | 515 |
| RAD52   | -0.06918 | 0.116859 | 0.198824 | 515 | 515 |
| MPV17L2 | -0.06917 | 0.116945 | 0.19894  | 515 | 515 |
| PPIG    | -0.06916 | 0.116963 | 0.19894  | 515 | 515 |
| CLPTMIL | -0.06916 | 0.116967 | 0.19894  | 515 | 515 |
| STC2    | -0.06912 | 0.117186 | 0.199223 | 515 | 515 |
| ZNF497  | -0.0691  | 0.117282 | 0.19934  | 515 | 515 |
| PRKAR1A | -0.0691  | 0.117323 | 0.199392 | 515 | 515 |
| TFAP2B  | -0.06909 | 0.117341 | 0.199406 | 515 | 256 |
| OR51F2  | -0.06906 | 0.117496 | 0.199619 | 515 | 6   |
| SNAPC5  | -0.06904 | 0.117645 | 0.199837 | 515 | 515 |

|           |          |          |          |     |     |
|-----------|----------|----------|----------|-----|-----|
| AK7       | -0.06902 | 0.117729 | 0.199947 | 515 | 515 |
| SRF       | -0.069   | 0.117828 | 0.200087 | 515 | 515 |
| HOXD9     | -0.069   | 0.117832 | 0.200087 | 515 | 505 |
| MAGEB16   | -0.069   | 0.117858 | 0.200098 | 515 | 65  |
| GUCA2A    | -0.06899 | 0.117874 | 0.200108 | 515 | 283 |
| TLX3      | -0.06898 | 0.11792  | 0.200168 | 515 | 97  |
| BMPR1B    | -0.06898 | 0.117963 | 0.200225 | 515 | 515 |
| C17orf102 | -0.06896 | 0.118059 | 0.200354 | 515 | 208 |
| LOC100130 | -0.06895 | 0.118078 | 0.200369 | 515 | 181 |
| NDUFA8    | -0.06893 | 0.118187 | 0.20052  | 515 | 515 |
| PAX9      | -0.06893 | 0.118213 | 0.200547 | 515 | 515 |
| IRS4      | -0.06893 | 0.11823  | 0.200559 | 515 | 246 |
| HNF1A     | -0.06891 | 0.118334 | 0.200717 | 515 | 514 |
| CHPF2     | -0.0689  | 0.118349 | 0.200727 | 515 | 515 |
| USP30     | -0.06889 | 0.118445 | 0.200855 | 515 | 515 |
| BMP6      | -0.06888 | 0.118487 | 0.200906 | 515 | 515 |
| SGK196    | -0.06888 | 0.118495 | 0.200906 | 515 | 514 |
| TRIM49    | -0.06887 | 0.11853  | 0.200949 | 515 | 206 |
| ZNF326    | -0.06887 | 0.118547 | 0.200951 | 515 | 515 |
| FOXP2     | -0.06887 | 0.118552 | 0.200951 | 515 | 514 |
| CCDC72    | -0.06885 | 0.118656 | 0.201077 | 515 | 515 |
| SPANXN1   | -0.06882 | 0.118799 | 0.201268 | 515 | 7   |
| KRT34     | -0.0688  | 0.118932 | 0.201459 | 515 | 145 |
| DUSP21    | -0.0688  | 0.118932 | 0.201459 | 515 | 10  |
| REX02     | -0.06878 | 0.119004 | 0.201553 | 515 | 515 |
| NEIL2     | -0.06877 | 0.119071 | 0.201625 | 515 | 515 |
| BAIAP2L2  | -0.06873 | 0.119286 | 0.201939 | 515 | 514 |
| PPT2      | -0.0687  | 0.119426 | 0.202089 | 515 | 515 |
| PHF12     | -0.0687  | 0.119434 | 0.202089 | 515 | 515 |
| SCNN1B    | -0.0687  | 0.119435 | 0.202089 | 515 | 515 |
| NAF1      | -0.06868 | 0.11953  | 0.202204 | 515 | 515 |
| DUSP12    | -0.06868 | 0.119541 | 0.202204 | 515 | 515 |
| PRICKLE4  | -0.06867 | 0.119625 | 0.202294 | 515 | 515 |
| PCDHA11   | -0.06861 | 0.119939 | 0.202787 | 515 | 509 |
| EIF2C1    | -0.0686  | 0.119962 | 0.202807 | 515 | 515 |
| TFAP2C    | -0.06857 | 0.120146 | 0.203085 | 515 | 515 |
| LOC402644 | -0.06855 | 0.120259 | 0.203241 | 515 | 93  |
| SP1       | -0.06842 | 0.12095  | 0.204289 | 515 | 515 |
| EPHA8     | -0.06842 | 0.120989 | 0.204338 | 515 | 318 |
| NFATC4    | -0.06841 | 0.121029 | 0.204387 | 515 | 515 |
| MDGA2     | -0.06839 | 0.121135 | 0.204549 | 515 | 182 |
| PSAPL1    | -0.06837 | 0.121256 | 0.204702 | 515 | 424 |
| TLE3      | -0.06836 | 0.121304 | 0.204719 | 515 | 515 |
| BCKDHA    | -0.06836 | 0.121307 | 0.204719 | 515 | 515 |
| QPRT      | -0.06835 | 0.121372 | 0.20481  | 515 | 515 |
| TIGD2     | -0.06834 | 0.121427 | 0.20487  | 515 | 515 |
| IGSF11    | -0.06832 | 0.121486 | 0.204935 | 515 | 492 |
| HIBADH    | -0.06832 | 0.121525 | 0.204983 | 515 | 515 |
| C19orf47  | -0.0683  | 0.12161  | 0.205109 | 515 | 515 |
| AP1S1     | -0.06827 | 0.121792 | 0.205363 | 515 | 515 |
| RPL23AP32 | -0.06827 | 0.121805 | 0.205369 | 515 | 391 |
| PRKCI     | -0.06824 | 0.121962 | 0.205611 | 515 | 515 |
| ARSH      | -0.06823 | 0.122014 | 0.205669 | 515 | 431 |
| TBC1D3P2  | -0.06821 | 0.122135 | 0.205838 | 515 | 111 |

|           |          |          |          |     |     |
|-----------|----------|----------|----------|-----|-----|
| MCM3AP    | -0.06819 | 0.122242 | 0.206001 | 515 | 515 |
| DHRS12    | -0.06818 | 0.122258 | 0.20601  | 515 | 515 |
| PRTN3     | -0.06818 | 0.122277 | 0.206013 | 515 | 326 |
| CCDC77    | -0.06818 | 0.122281 | 0.206013 | 515 | 515 |
| DNAJB3    | -0.06812 | 0.122579 | 0.206462 | 515 | 156 |
| DGKQ      | -0.06811 | 0.122666 | 0.206558 | 515 | 515 |
| PDXDC2    | -0.0681  | 0.122725 | 0.206623 | 515 | 515 |
| LOC149134 | -0.06808 | 0.122823 | 0.206735 | 515 | 509 |
| DLX6AS    | -0.06806 | 0.122954 | 0.206903 | 515 | 287 |
| DMD       | -0.06804 | 0.123029 | 0.206977 | 515 | 515 |
| OR2B3     | -0.06803 | 0.123079 | 0.207045 | 515 | 4   |
| BCAS3     | -0.06801 | 0.123208 | 0.207226 | 515 | 515 |
| TRIM8     | -0.06795 | 0.123525 | 0.207707 | 515 | 515 |
| CCL27     | -0.06794 | 0.123581 | 0.207785 | 515 | 153 |
| FAM48A    | -0.06792 | 0.123684 | 0.207939 | 515 | 515 |
| DSG4      | -0.06792 | 0.123705 | 0.207957 | 515 | 171 |
| HTT       | -0.06791 | 0.123744 | 0.207985 | 515 | 515 |
| CRCP      | -0.06791 | 0.123753 | 0.207985 | 515 | 515 |
| TLL1      | -0.0679  | 0.123812 | 0.208068 | 515 | 515 |
| ELOVL3    | -0.0679  | 0.123828 | 0.208077 | 515 | 500 |
| DNAJC16   | -0.06789 | 0.123882 | 0.208133 | 515 | 515 |
| EIF4EBP1  | -0.06787 | 0.123995 | 0.208305 | 515 | 515 |
| CT47A1    | -0.06787 | 0.124012 | 0.208316 | 515 | 10  |
| ATP6V0E2  | -0.06786 | 0.124025 | 0.20832  | 515 | 515 |
| ZNF57     | -0.06784 | 0.124165 | 0.208538 | 515 | 515 |
| C20orf24  | -0.06784 | 0.124183 | 0.20855  | 515 | 515 |
| KRTAP10-6 | -0.06783 | 0.124195 | 0.208553 | 515 | 23  |
| NUDT16L1  | -0.06782 | 0.124259 | 0.208642 | 515 | 515 |
| NSDHL     | -0.06782 | 0.124289 | 0.208676 | 515 | 515 |
| EEFSEC    | -0.0678  | 0.12438  | 0.208811 | 515 | 515 |
| FAM50A    | -0.06779 | 0.124452 | 0.208891 | 515 | 515 |
| ADAMTS19  | -0.06779 | 0.124457 | 0.208891 | 515 | 196 |
| BUD31     | -0.06779 | 0.124459 | 0.208891 | 515 | 515 |
| LBXCOR1   | -0.06778 | 0.124513 | 0.208964 | 515 | 490 |
| PLAC2     | -0.06776 | 0.124575 | 0.209051 | 515 | 515 |
| EZR       | -0.06776 | 0.124599 | 0.209074 | 515 | 515 |
| L3MBTL    | -0.06776 | 0.12461  | 0.209075 | 515 | 515 |
| CNTD2     | -0.06775 | 0.124642 | 0.209111 | 515 | 512 |
| MAEL      | -0.06772 | 0.124815 | 0.209366 | 515 | 433 |
| TMEM196   | -0.06772 | 0.124833 | 0.209379 | 515 | 85  |
| DIP2C     | -0.06769 | 0.125017 | 0.209634 | 515 | 515 |
| RASSF10   | -0.06767 | 0.12508  | 0.209722 | 515 | 511 |
| IDH3A     | -0.06767 | 0.1251   | 0.209738 | 515 | 515 |
| LOC647309 | -0.06765 | 0.125205 | 0.209864 | 515 | 288 |
| PGAM5     | -0.06764 | 0.125259 | 0.209934 | 515 | 515 |
| PARK7     | -0.06763 | 0.125332 | 0.209986 | 515 | 515 |
| ZNF30     | -0.0676  | 0.125475 | 0.210155 | 515 | 515 |
| PEX11B    | -0.0676  | 0.12548  | 0.210155 | 515 | 515 |
| TEAD4     | -0.0676  | 0.1255   | 0.210162 | 515 | 515 |
| LPCAT4    | -0.06759 | 0.125555 | 0.210237 | 515 | 515 |
| ASAP2     | -0.06755 | 0.125773 | 0.210566 | 515 | 515 |
| FEV       | -0.06751 | 0.126014 | 0.210917 | 515 | 212 |
| IL17D     | -0.0675  | 0.126061 | 0.210959 | 515 | 511 |
| NUDT3     | -0.06748 | 0.126192 | 0.211144 | 515 | 515 |

|           |          |          |          |     |     |
|-----------|----------|----------|----------|-----|-----|
| TCF15     | -0.06745 | 0.126361 | 0.211376 | 515 | 494 |
| PPM1B     | -0.06745 | 0.126362 | 0.211376 | 515 | 515 |
| RPRM      | -0.06743 | 0.126443 | 0.211494 | 515 | 486 |
| OBFC2B    | -0.06741 | 0.12654  | 0.211638 | 515 | 515 |
| CYP17A1   | -0.0674  | 0.126616 | 0.211724 | 515 | 421 |
| KIAA0495  | -0.06739 | 0.12668  | 0.211791 | 515 | 515 |
| ZBTB39    | -0.06738 | 0.126743 | 0.21187  | 515 | 515 |
| GSTA1     | -0.06737 | 0.126762 | 0.211884 | 515 | 507 |
| RBBP7     | -0.06737 | 0.126774 | 0.211888 | 515 | 515 |
| FUBP3     | -0.06735 | 0.126924 | 0.212067 | 515 | 515 |
| LOC90110  | -0.06734 | 0.126975 | 0.212134 | 515 | 515 |
| GOLGA2B   | -0.06733 | 0.126989 | 0.212141 | 515 | 515 |
| PDE3A     | -0.06731 | 0.127101 | 0.212309 | 515 | 515 |
| SNRNP70   | -0.06731 | 0.127129 | 0.212338 | 515 | 515 |
| IL28RA    | -0.06729 | 0.127226 | 0.212464 | 515 | 515 |
| LOC283332 | -0.06729 | 0.127238 | 0.212467 | 515 | 82  |
| CSTL1     | -0.06729 | 0.127257 | 0.212481 | 515 | 234 |
| C20orf71  | -0.06728 | 0.127309 | 0.21255  | 515 | 16  |
| OR1J2     | -0.06725 | 0.12746  | 0.212766 | 515 | 252 |
| KCNJ4     | -0.06722 | 0.127614 | 0.21297  | 515 | 223 |
| IER5L     | -0.06722 | 0.12765  | 0.212992 | 515 | 515 |
| ACVR1B    | -0.06722 | 0.127659 | 0.212992 | 515 | 515 |
| FBXL14    | -0.0672  | 0.127761 | 0.213121 | 515 | 515 |
| ATP6AP1   | -0.0672  | 0.127768 | 0.213121 | 515 | 515 |
| FGD1      | -0.06719 | 0.127788 | 0.213136 | 515 | 515 |
| SURF2     | -0.06718 | 0.127883 | 0.213259 | 515 | 515 |
| LOC100288 | -0.06717 | 0.127897 | 0.213264 | 515 | 515 |
| MAGEC1    | -0.06716 | 0.127954 | 0.213343 | 515 | 280 |
| TCHP      | -0.06716 | 0.127997 | 0.213395 | 515 | 515 |
| LOC645323 | -0.06712 | 0.128226 | 0.213724 | 515 | 391 |
| MOGAT3    | -0.06707 | 0.128472 | 0.214117 | 515 | 85  |
| TEX101    | -0.06706 | 0.128523 | 0.214183 | 515 | 137 |
| ZNF250    | -0.06706 | 0.128537 | 0.214188 | 515 | 515 |
| C14orf80  | -0.06705 | 0.128622 | 0.214312 | 515 | 515 |
| HOXA11AS  | -0.06702 | 0.128791 | 0.214554 | 515 | 314 |
| UGT2B4    | -0.06702 | 0.128799 | 0.214554 | 515 | 442 |
| C9orf100  | -0.06701 | 0.128844 | 0.214612 | 515 | 515 |
| BTBD9     | -0.067   | 0.128887 | 0.214648 | 515 | 515 |
| ZNF468    | -0.06698 | 0.12903  | 0.21485  | 515 | 515 |
| FARS2     | -0.06697 | 0.129055 | 0.214873 | 515 | 515 |
| C11orf1   | -0.06696 | 0.129125 | 0.214954 | 515 | 515 |
| IVD       | -0.06696 | 0.129141 | 0.214962 | 515 | 515 |
| CYP2B6    | -0.06695 | 0.12918  | 0.21501  | 515 | 456 |
| SSNA1     | -0.06693 | 0.12927  | 0.215141 | 515 | 515 |
| MSRB2     | -0.0669  | 0.129488 | 0.215486 | 515 | 515 |
| RPL10L    | -0.06687 | 0.129658 | 0.215715 | 515 | 133 |
| HOXC6     | -0.06685 | 0.12973  | 0.215799 | 515 | 511 |
| KRTAP8-1  | -0.06685 | 0.129752 | 0.215818 | 515 | 8   |
| DNAJC25-G | -0.06684 | 0.129804 | 0.215886 | 515 | 96  |
| RGMB      | -0.06683 | 0.129864 | 0.215968 | 515 | 515 |
| ARHGEF7   | -0.06682 | 0.129935 | 0.216069 | 515 | 515 |
| HOXD8     | -0.06681 | 0.129959 | 0.21609  | 515 | 511 |
| NAV2      | -0.06681 | 0.129991 | 0.216126 | 515 | 515 |
| EMD       | -0.0668  | 0.130059 | 0.21622  | 515 | 515 |

|           |          |          |          |     |     |
|-----------|----------|----------|----------|-----|-----|
| MTOR      | -0.06677 | 0.130185 | 0.216394 | 515 | 515 |
| HKR1      | -0.06675 | 0.130329 | 0.216561 | 515 | 515 |
| PVRL2     | -0.06675 | 0.130342 | 0.216564 | 515 | 515 |
| C1QL4     | -0.06674 | 0.130415 | 0.216668 | 515 | 326 |
| WASH7P    | -0.06672 | 0.13051  | 0.216796 | 515 | 515 |
| TMEM160   | -0.0667  | 0.130611 | 0.21694  | 515 | 515 |
| ANKRD19   | -0.06667 | 0.130819 | 0.217234 | 515 | 515 |
| KIAA0240  | -0.06666 | 0.130824 | 0.217234 | 515 | 515 |
| WIPF2     | -0.06666 | 0.130843 | 0.217234 | 515 | 515 |
| MRPL42    | -0.06666 | 0.130855 | 0.217237 | 515 | 515 |
| HIST1H3A  | -0.06664 | 0.130975 | 0.2174   | 515 | 306 |
| SSX7      | -0.06662 | 0.131066 | 0.217534 | 515 | 17  |
| PCDHA1    | -0.06661 | 0.131121 | 0.217606 | 515 | 484 |
| TARS      | -0.06657 | 0.131355 | 0.217977 | 515 | 515 |
| VDAC3     | -0.06654 | 0.131572 | 0.218246 | 515 | 515 |
| LRRC37B2  | -0.0665  | 0.131759 | 0.218518 | 515 | 515 |
| DCAF8L1   | -0.06648 | 0.131916 | 0.218689 | 515 | 101 |
| BTBD17    | -0.06646 | 0.131992 | 0.218796 | 515 | 155 |
| TDGF1     | -0.06645 | 0.13209  | 0.218923 | 515 | 456 |
| SNORD15A  | -0.06644 | 0.132131 | 0.218973 | 515 | 74  |
| FRMPD2L1  | -0.06644 | 0.132147 | 0.218982 | 515 | 65  |
| QRFPR     | -0.06642 | 0.132236 | 0.219075 | 515 | 232 |
| MRPL35    | -0.06641 | 0.132312 | 0.219133 | 515 | 515 |
| MAP3K6    | -0.06641 | 0.132323 | 0.219133 | 515 | 515 |
| CLDN6     | -0.0664  | 0.132355 | 0.219151 | 515 | 490 |
| HEPHL1    | -0.06639 | 0.132408 | 0.219177 | 515 | 423 |
| KLK8      | -0.06639 | 0.132414 | 0.219177 | 515 | 325 |
| CTAGE9    | -0.06637 | 0.132538 | 0.219356 | 515 | 515 |
| VANGL1    | -0.06637 | 0.132565 | 0.219383 | 515 | 515 |
| PLXNA2    | -0.06635 | 0.132627 | 0.219449 | 515 | 515 |
| GJD4      | -0.06635 | 0.13266  | 0.219485 | 515 | 245 |
| MRPL16    | -0.06631 | 0.132862 | 0.219782 | 515 | 515 |
| FAM133B   | -0.06631 | 0.132883 | 0.219782 | 515 | 515 |
| PSEN2     | -0.06628 | 0.133057 | 0.220015 | 515 | 515 |
| NDUFS3    | -0.06628 | 0.133083 | 0.220041 | 515 | 515 |
| MYOM3     | -0.06622 | 0.133397 | 0.220522 | 515 | 493 |
| SERPINB12 | -0.06622 | 0.133435 | 0.220549 | 515 | 49  |
| POLRMT    | -0.0662  | 0.133543 | 0.220709 | 515 | 515 |
| TMPPE     | -0.06617 | 0.133731 | 0.221001 | 515 | 515 |
| CUL5      | -0.06601 | 0.134646 | 0.22235  | 515 | 515 |
| ATP5H     | -0.066   | 0.134695 | 0.222411 | 515 | 515 |
| FAM26D    | -0.06598 | 0.134855 | 0.222638 | 515 | 75  |
| ACTR1B    | -0.06596 | 0.134932 | 0.222728 | 515 | 515 |
| KLHL17    | -0.06593 | 0.135101 | 0.222989 | 515 | 515 |
| LOC440925 | -0.06592 | 0.135184 | 0.223108 | 515 | 511 |
| PQBP1     | -0.06589 | 0.135336 | 0.223322 | 515 | 515 |
| ZNF480    | -0.06587 | 0.135487 | 0.223528 | 515 | 515 |
| ADM2      | -0.06586 | 0.135522 | 0.223555 | 515 | 515 |
| FAM96B    | -0.06586 | 0.135556 | 0.223593 | 515 | 515 |
| GPATCH1   | -0.06582 | 0.135767 | 0.223921 | 515 | 515 |
| OR2J2     | -0.06582 | 0.135789 | 0.223939 | 515 | 21  |
| LSM2      | -0.06581 | 0.135817 | 0.223968 | 515 | 515 |
| PL-5283   | -0.0658  | 0.135889 | 0.224067 | 515 | 515 |
| POLDIP3   | -0.0658  | 0.135914 | 0.224067 | 515 | 515 |



|           |          |          |          |     |     |
|-----------|----------|----------|----------|-----|-----|
| SCLY      | -0.0658  | 0.13592  | 0.224067 | 515 | 515 |
| ZNF251    | -0.06579 | 0.13595  | 0.224094 | 515 | 515 |
| AES       | -0.06578 | 0.136017 | 0.224186 | 515 | 515 |
| RPL14     | -0.06574 | 0.136271 | 0.22453  | 515 | 515 |
| NCRNA0015 | -0.06573 | 0.136328 | 0.224607 | 515 | 22  |
| FAM86A    | -0.0657  | 0.1365   | 0.224834 | 515 | 515 |
| PRAMEF11  | -0.06561 | 0.137063 | 0.225705 | 515 | 24  |
| LOC347376 | -0.0656  | 0.137101 | 0.22573  | 515 | 261 |
| SYMPK     | -0.0656  | 0.137114 | 0.225735 | 515 | 515 |
| CENPF     | -0.06558 | 0.137195 | 0.225849 | 515 | 515 |
| C14orf156 | -0.06558 | 0.137228 | 0.225884 | 515 | 515 |
| PABPC1L   | -0.06555 | 0.1374   | 0.226122 | 515 | 515 |
| LOC643763 | -0.06555 | 0.137427 | 0.226122 | 515 | 348 |
| AHSG      | -0.06554 | 0.137429 | 0.226122 | 515 | 267 |
| WDR43     | -0.06553 | 0.137533 | 0.226274 | 515 | 515 |
| SNRPD1    | -0.0655  | 0.13771  | 0.226547 | 515 | 515 |
| C21orf70  | -0.06549 | 0.137743 | 0.226582 | 515 | 515 |
| OLFM3     | -0.06548 | 0.137826 | 0.2267   | 515 | 146 |
| KRT9      | -0.06547 | 0.137864 | 0.226745 | 515 | 109 |
| FOXN4     | -0.06544 | 0.138081 | 0.227026 | 515 | 335 |
| ZNF526    | -0.06541 | 0.138218 | 0.227177 | 515 | 515 |
| TESK1     | -0.06539 | 0.138343 | 0.227345 | 515 | 515 |
| C11orf54  | -0.06537 | 0.138455 | 0.227492 | 515 | 515 |
| OR5P3     | -0.06536 | 0.138546 | 0.227603 | 515 | 54  |
| ARFGEF1   | -0.06534 | 0.138656 | 0.227745 | 515 | 515 |
| HNRNPA3P1 | -0.06531 | 0.138827 | 0.227915 | 515 | 515 |
| GPD1L     | -0.06531 | 0.138831 | 0.227915 | 515 | 515 |
| FBXO34    | -0.06531 | 0.138862 | 0.227935 | 515 | 515 |
| DKFZP434L | -0.0653  | 0.13891  | 0.227973 | 515 | 269 |
| RBAK      | -0.06529 | 0.138985 | 0.228063 | 515 | 515 |
| METAP1    | -0.06524 | 0.139262 | 0.228452 | 515 | 515 |
| CST9      | -0.06524 | 0.139268 | 0.228452 | 515 | 27  |
| SNORA71A  | -0.06522 | 0.139412 | 0.228633 | 515 | 55  |
| PARM1     | -0.06519 | 0.139581 | 0.228871 | 515 | 515 |
| BRD4      | -0.06517 | 0.139708 | 0.229042 | 515 | 515 |
| FUT6      | -0.06515 | 0.139798 | 0.229171 | 515 | 513 |
| LAGE3     | -0.06515 | 0.139847 | 0.229233 | 515 | 515 |
| KANK4     | -0.06514 | 0.139904 | 0.229306 | 515 | 514 |
| STX3      | -0.0651  | 0.140149 | 0.229638 | 515 | 515 |
| ALDH9A1   | -0.0651  | 0.140152 | 0.229638 | 515 | 515 |
| ATF6      | -0.06509 | 0.140204 | 0.229687 | 515 | 515 |
| TELO2     | -0.06508 | 0.140217 | 0.229689 | 515 | 515 |
| GSPT1     | -0.06505 | 0.140415 | 0.229956 | 515 | 515 |
| HSFY2     | -0.06496 | 0.140955 | 0.230784 | 515 | 105 |
| C3orf27   | -0.06496 | 0.140969 | 0.230787 | 515 | 130 |
| GOT1      | -0.06494 | 0.141107 | 0.230956 | 515 | 515 |
| CREB3L1   | -0.06493 | 0.141192 | 0.231078 | 515 | 515 |
| MGC16025  | -0.06491 | 0.141263 | 0.231155 | 515 | 366 |
| RAGE      | -0.06487 | 0.141507 | 0.231498 | 515 | 515 |
| AP3S2     | -0.06487 | 0.14155  | 0.23155  | 515 | 515 |
| TEKT5     | -0.06484 | 0.141695 | 0.23173  | 515 | 484 |
| E2F3      | -0.06484 | 0.141695 | 0.23173  | 515 | 515 |
| RPL13     | -0.06482 | 0.14186  | 0.231937 | 515 | 515 |
| ACAD9     | -0.06482 | 0.141868 | 0.231937 | 515 | 515 |

|           |          |          |          |     |     |
|-----------|----------|----------|----------|-----|-----|
| LRTM1     | -0.06475 | 0.142254 | 0.232548 | 515 | 84  |
| SPIN1     | -0.06473 | 0.142368 | 0.232691 | 515 | 515 |
| C17orf55  | -0.06473 | 0.142376 | 0.232691 | 515 | 514 |
| CPNE1     | -0.06468 | 0.142705 | 0.23319  | 515 | 515 |
| MRPL3     | -0.06467 | 0.142766 | 0.233259 | 515 | 515 |
| C8orf38   | -0.06466 | 0.142818 | 0.233318 | 515 | 515 |
| NUDT5     | -0.06465 | 0.142863 | 0.233373 | 515 | 515 |
| TFDP3     | -0.06464 | 0.142971 | 0.233531 | 515 | 133 |
| TCERG1    | -0.06463 | 0.142991 | 0.233531 | 515 | 515 |
| MLL4      | -0.06463 | 0.143007 | 0.233531 | 515 | 515 |
| TTC28     | -0.06462 | 0.143096 | 0.233658 | 515 | 515 |
| KCNQ1     | -0.06461 | 0.143144 | 0.233716 | 515 | 515 |
| PMPCB     | -0.06459 | 0.143235 | 0.23382  | 515 | 515 |
| PRKAG1    | -0.06459 | 0.143243 | 0.23382  | 515 | 515 |
| RIMS4     | -0.06458 | 0.143317 | 0.233917 | 515 | 507 |
| CNOT2     | -0.06457 | 0.14339  | 0.233984 | 515 | 515 |
| POLR2B    | -0.06455 | 0.143493 | 0.234131 | 515 | 515 |
| DLI       | -0.06455 | 0.143503 | 0.234131 | 515 | 515 |
| SIN3B     | -0.06454 | 0.143564 | 0.234192 | 515 | 515 |
| KPNB1     | -0.06453 | 0.143634 | 0.234268 | 515 | 515 |
| RPP40     | -0.0645  | 0.14385  | 0.234545 | 515 | 515 |
| PIP4K2C   | -0.06449 | 0.143873 | 0.234563 | 515 | 515 |
| RBM1E     | -0.06448 | 0.143926 | 0.23463  | 515 | 16  |
| MYST3     | -0.06445 | 0.144155 | 0.23492  | 515 | 515 |
| MRS2P2    | -0.06445 | 0.144157 | 0.23492  | 515 | 482 |
| ZNF592    | -0.06443 | 0.144256 | 0.235033 | 515 | 515 |
| PRLH      | -0.06439 | 0.144491 | 0.235397 | 515 | 20  |
| NDUFAB1   | -0.06439 | 0.144527 | 0.235419 | 515 | 515 |
| POLR2I    | -0.06439 | 0.144528 | 0.235419 | 515 | 515 |
| XG        | -0.06434 | 0.14481  | 0.235859 | 515 | 485 |
| PTH2      | -0.06434 | 0.144848 | 0.235901 | 515 | 18  |
| AMMECR1   | -0.06431 | 0.144993 | 0.236118 | 515 | 515 |
| SNAPIN    | -0.06431 | 0.14502  | 0.236144 | 515 | 515 |
| NCRNA0021 | -0.06429 | 0.145124 | 0.236243 | 515 | 515 |
| FAM69B    | -0.06428 | 0.145187 | 0.236319 | 515 | 515 |
| FEM1B     | -0.06427 | 0.145267 | 0.236431 | 515 | 515 |
| EPOR      | -0.06424 | 0.145446 | 0.236664 | 515 | 515 |
| SELV      | -0.06422 | 0.145593 | 0.236845 | 515 | 79  |
| ZSCAN10   | -0.06415 | 0.146031 | 0.2375   | 515 | 210 |
| NUP98     | -0.06414 | 0.146047 | 0.237507 | 515 | 515 |
| KRT81     | -0.06413 | 0.14614  | 0.237619 | 515 | 515 |
| FAM57A    | -0.06413 | 0.146155 | 0.237624 | 515 | 515 |
| LMNA      | -0.0641  | 0.146307 | 0.237851 | 515 | 515 |
| PXMP4     | -0.06408 | 0.146479 | 0.238088 | 515 | 515 |
| DAP3      | -0.06405 | 0.146655 | 0.23834  | 515 | 515 |
| LUC7L3    | -0.06401 | 0.146928 | 0.238764 | 515 | 515 |
| LARP1     | -0.06399 | 0.147025 | 0.238883 | 515 | 515 |
| MYCBP     | -0.06399 | 0.147052 | 0.238907 | 515 | 515 |
| WFDC12    | -0.06398 | 0.147065 | 0.238909 | 515 | 353 |
| DOCK6     | -0.06397 | 0.147157 | 0.239039 | 515 | 515 |
| CNGA3     | -0.06396 | 0.147226 | 0.239131 | 515 | 487 |
| KIAA0913  | -0.06395 | 0.147272 | 0.239187 | 515 | 515 |
| STOX1     | -0.06395 | 0.147299 | 0.239192 | 515 | 515 |
| PRAC      | -0.06392 | 0.147493 | 0.239449 | 515 | 27  |

|          |          |          |          |     |     |
|----------|----------|----------|----------|-----|-----|
| ZNF610   | -0.0639  | 0.147573 | 0.23954  | 515 | 515 |
| OFD1     | -0.06389 | 0.147629 | 0.239611 | 515 | 515 |
| ESYT2    | -0.06389 | 0.147671 | 0.23966  | 515 | 515 |
| CST11    | -0.06387 | 0.147799 | 0.239829 | 515 | 49  |
| ZNF646   | -0.06386 | 0.147845 | 0.239883 | 515 | 515 |
| FEM1A    | -0.06385 | 0.147902 | 0.23993  | 515 | 515 |
| RBMV2EP  | -0.06385 | 0.147904 | 0.23993  | 515 | 15  |
| LM07     | -0.06384 | 0.14796  | 0.239992 | 515 | 515 |
| PDZD3    | -0.06381 | 0.148157 | 0.240273 | 515 | 407 |
| GNB5     | -0.06381 | 0.148186 | 0.2403   | 515 | 515 |
| NBPF22P  | -0.06379 | 0.148303 | 0.240467 | 515 | 125 |
| MSMP     | -0.06379 | 0.148313 | 0.240467 | 515 | 515 |
| FAM157A  | -0.06371 | 0.148798 | 0.241175 | 515 | 514 |
| ASXL1    | -0.0637  | 0.148868 | 0.241269 | 515 | 515 |
| CDH1     | -0.06366 | 0.14912  | 0.241634 | 515 | 515 |
| EIF2A    | -0.06366 | 0.149151 | 0.241649 | 515 | 515 |
| ADAMTS13 | -0.06365 | 0.149212 | 0.241711 | 515 | 515 |
| GP9      | -0.06365 | 0.149213 | 0.241711 | 515 | 272 |
| PI4K2B   | -0.06364 | 0.149256 | 0.241761 | 515 | 515 |
| OR1F1    | -0.06361 | 0.149433 | 0.242028 | 515 | 142 |
| ACTL8    | -0.06361 | 0.149452 | 0.242039 | 515 | 261 |
| TTC12    | -0.06358 | 0.149635 | 0.242316 | 515 | 515 |
| DND1     | -0.06357 | 0.14967  | 0.242353 | 515 | 515 |
| C20orf30 | -0.0635  | 0.150177 | 0.243063 | 515 | 515 |
| PCDHA7   | -0.06347 | 0.150376 | 0.243359 | 515 | 509 |
| LIN28A   | -0.06343 | 0.150601 | 0.243702 | 515 | 165 |
| SNORA27  | -0.06343 | 0.150624 | 0.24372  | 515 | 61  |
| INSL6    | -0.06341 | 0.150702 | 0.243827 | 515 | 97  |
| CHD2     | -0.06339 | 0.150835 | 0.244022 | 515 | 515 |
| TBC1D28  | -0.06337 | 0.150972 | 0.244194 | 515 | 24  |
| TMEM150A | -0.06337 | 0.151011 | 0.244194 | 515 | 515 |
| POLR1A   | -0.06337 | 0.151015 | 0.244194 | 515 | 515 |
| PTPMT1   | -0.06335 | 0.151099 | 0.244291 | 515 | 515 |
| PCDHB17  | -0.06334 | 0.151154 | 0.24436  | 515 | 499 |
| C7orf53  | -0.06334 | 0.151201 | 0.244416 | 515 | 514 |
| CADM2    | -0.06333 | 0.151243 | 0.244465 | 515 | 421 |
| KIFC3    | -0.06331 | 0.151359 | 0.244593 | 515 | 515 |
| ZNF254   | -0.06329 | 0.151517 | 0.244808 | 515 | 515 |
| MED8     | -0.06326 | 0.151716 | 0.245077 | 515 | 515 |
| OR8B3    | -0.06326 | 0.15172  | 0.245077 | 515 | 5   |
| ZNF630   | -0.06324 | 0.151806 | 0.245156 | 515 | 513 |
| GREM2    | -0.06323 | 0.151879 | 0.245255 | 515 | 512 |
| EYA2     | -0.06323 | 0.151894 | 0.245258 | 515 | 515 |
| LONP2    | -0.06323 | 0.151919 | 0.245259 | 515 | 515 |
| FSTL5    | -0.06322 | 0.151938 | 0.245259 | 515 | 251 |
| ACTRT1   | -0.06322 | 0.15195  | 0.245259 | 515 | 60  |
| TAAR8    | -0.06322 | 0.151956 | 0.245259 | 515 | 10  |
| FAIM     | -0.06322 | 0.151979 | 0.245278 | 515 | 515 |
| IMPAD1   | -0.0632  | 0.15206  | 0.245369 | 515 | 515 |
| SUMO1    | -0.0632  | 0.152106 | 0.245423 | 515 | 515 |
| C9orf106 | -0.06319 | 0.152125 | 0.245433 | 515 | 354 |
| GPR89B   | -0.06319 | 0.152147 | 0.245436 | 515 | 515 |
| MYEF2    | -0.06316 | 0.152356 | 0.245727 | 515 | 515 |
| CD3EAP   | -0.06315 | 0.152446 | 0.245852 | 515 | 515 |

|           |          |          |          |     |     |
|-----------|----------|----------|----------|-----|-----|
| C10orf32  | -0.06313 | 0.152571 | 0.246014 | 515 | 515 |
| WFDC2     | -0.06309 | 0.152824 | 0.246362 | 515 | 515 |
| OR8G2     | -0.06308 | 0.152845 | 0.246376 | 515 | 14  |
| RIPPLY2   | -0.06308 | 0.15286  | 0.246381 | 515 | 103 |
| DSP       | -0.06307 | 0.152933 | 0.246458 | 515 | 515 |
| NCRNA0011 | -0.06302 | 0.15326  | 0.246925 | 515 | 55  |
| OR52E6    | -0.063   | 0.153373 | 0.247054 | 515 | 42  |
| KLHL24    | -0.06299 | 0.153444 | 0.247103 | 515 | 515 |
| AQP2      | -0.06299 | 0.153462 | 0.247112 | 515 | 365 |
| GNMT      | -0.06293 | 0.153838 | 0.247637 | 515 | 507 |
| AKAP8     | -0.06291 | 0.153954 | 0.247804 | 515 | 515 |
| MEP1B     | -0.06287 | 0.154257 | 0.248232 | 515 | 186 |
| PRLHR     | -0.06283 | 0.154539 | 0.248665 | 515 | 82  |
| CAPRIN1   | -0.06282 | 0.154607 | 0.248749 | 515 | 515 |
| FLJ44635  | -0.06281 | 0.154615 | 0.248749 | 515 | 515 |
| HIST1H3H  | -0.0628  | 0.154681 | 0.248814 | 515 | 510 |
| ARRB1     | -0.06279 | 0.15477  | 0.248886 | 515 | 515 |
| TFF2      | -0.06273 | 0.15515  | 0.249427 | 515 | 242 |
| KCNE4     | -0.06266 | 0.155641 | 0.250137 | 515 | 515 |
| C9orf140  | -0.06265 | 0.155706 | 0.250194 | 515 | 515 |
| ANKRD43   | -0.06265 | 0.155722 | 0.250194 | 515 | 500 |
| PPIA      | -0.06265 | 0.155726 | 0.250194 | 515 | 515 |
| PAPOLB    | -0.06262 | 0.155871 | 0.250365 | 515 | 244 |
| C20orf144 | -0.06262 | 0.15592  | 0.250424 | 515 | 195 |
| SCGN      | -0.06261 | 0.155988 | 0.250493 | 515 | 228 |
| ZNF238    | -0.06253 | 0.156473 | 0.251111 | 515 | 515 |
| GCM2      | -0.0625  | 0.156693 | 0.251406 | 515 | 80  |
| DTYMK     | -0.0625  | 0.156695 | 0.251406 | 515 | 515 |
| TBC1D17   | -0.06249 | 0.156749 | 0.251473 | 515 | 515 |
| OR9A4     | -0.06248 | 0.156791 | 0.25152  | 515 | 100 |
| TAF2      | -0.06248 | 0.156833 | 0.251552 | 515 | 515 |
| PRAMEF8   | -0.06247 | 0.156858 | 0.251567 | 515 | 75  |
| CDC16     | -0.06247 | 0.156881 | 0.251583 | 515 | 515 |
| MRPS36    | -0.06246 | 0.156931 | 0.251623 | 515 | 515 |
| UBR1      | -0.06242 | 0.15719  | 0.252019 | 515 | 515 |
| ZC3HC1    | -0.06242 | 0.157229 | 0.25206  | 515 | 515 |
| HINT2     | -0.06241 | 0.157298 | 0.252096 | 515 | 515 |
| RASAL1    | -0.06241 | 0.157301 | 0.252096 | 515 | 513 |
| TMPRSS12  | -0.06238 | 0.15746  | 0.25231  | 515 | 188 |
| PSD3      | -0.06238 | 0.157522 | 0.252369 | 515 | 515 |
| KCNV1     | -0.06232 | 0.157916 | 0.252939 | 515 | 322 |
| RNF145    | -0.06226 | 0.158319 | 0.253463 | 515 | 515 |
| CINP      | -0.0622  | 0.158679 | 0.253978 | 515 | 515 |
| PAX7      | -0.06219 | 0.158769 | 0.254072 | 515 | 345 |
| TMEM79    | -0.06215 | 0.159009 | 0.254384 | 515 | 515 |
| TDGF3     | -0.06215 | 0.159063 | 0.25443  | 515 | 267 |
| CACNA2D2  | -0.06214 | 0.159127 | 0.254473 | 515 | 515 |
| MMP8      | -0.06214 | 0.159128 | 0.254473 | 515 | 457 |
| TMEM30B   | -0.06212 | 0.159204 | 0.254553 | 515 | 515 |
| C11orf42  | -0.06212 | 0.15923  | 0.254553 | 515 | 316 |
| PTK7      | -0.06211 | 0.15932  | 0.254677 | 515 | 515 |
| EID2      | -0.06208 | 0.159526 | 0.254946 | 515 | 515 |
| C8orf73   | -0.06207 | 0.159598 | 0.255041 | 515 | 515 |
| MGST2     | -0.06206 | 0.159638 | 0.255064 | 515 | 515 |

|           |          |          |          |     |     |
|-----------|----------|----------|----------|-----|-----|
| PI4KB     | -0.06205 | 0.159728 | 0.255121 | 515 | 515 |
| LOC388946 | -0.06204 | 0.159738 | 0.255121 | 515 | 18  |
| RPL23     | -0.06204 | 0.159792 | 0.255187 | 515 | 515 |
| UBE2R2    | -0.06203 | 0.15983  | 0.25519  | 515 | 515 |
| CORO2A    | -0.06202 | 0.159937 | 0.255317 | 515 | 515 |
| THADA     | -0.062   | 0.160047 | 0.25543  | 515 | 515 |
| MKI67IP   | -0.06198 | 0.160143 | 0.255564 | 515 | 515 |
| PITPNM3   | -0.06196 | 0.160329 | 0.255821 | 515 | 515 |
| MAP2K5    | -0.06194 | 0.160431 | 0.255961 | 515 | 515 |
| ETFA      | -0.06193 | 0.160504 | 0.256058 | 515 | 515 |
| FLJ22536  | -0.06192 | 0.160578 | 0.256135 | 515 | 512 |
| PPP1R1B   | -0.0619  | 0.160734 | 0.256364 | 515 | 513 |
| GADD45G   | -0.06189 | 0.160818 | 0.256458 | 515 | 515 |
| SERPINB5  | -0.06188 | 0.160835 | 0.256464 | 515 | 489 |
| CREG2     | -0.06185 | 0.161071 | 0.2568   | 515 | 428 |
| TTR       | -0.06184 | 0.161098 | 0.256822 | 515 | 277 |
| SCNN1G    | -0.06184 | 0.161152 | 0.256874 | 515 | 515 |
| CASC4     | -0.06184 | 0.161156 | 0.256874 | 515 | 515 |
| RPS20     | -0.06181 | 0.161303 | 0.257086 | 515 | 515 |
| CEP164    | -0.06181 | 0.161316 | 0.257086 | 515 | 515 |
| C20orf12  | -0.06179 | 0.161484 | 0.257334 | 515 | 515 |
| TAF5      | -0.06177 | 0.161625 | 0.257538 | 515 | 515 |
| TRMT6     | -0.06172 | 0.161934 | 0.25799  | 515 | 515 |
| WDR93     | -0.06168 | 0.162179 | 0.258318 | 515 | 508 |
| WDR35     | -0.06168 | 0.162235 | 0.258366 | 515 | 515 |
| STRC      | -0.06167 | 0.162288 | 0.25843  | 515 | 501 |
| ZNF263    | -0.06164 | 0.162476 | 0.258709 | 515 | 515 |
| PDE6C     | -0.06164 | 0.162492 | 0.258713 | 515 | 140 |
| PPBPL2    | -0.06162 | 0.162652 | 0.258906 | 515 | 60  |
| COX7A2L   | -0.0616  | 0.162736 | 0.258979 | 515 | 515 |
| MRPL20    | -0.06155 | 0.163115 | 0.25954  | 515 | 515 |
| LOC100286 | -0.06152 | 0.163303 | 0.259778 | 515 | 515 |
| C1orf163  | -0.06151 | 0.163371 | 0.259865 | 515 | 515 |
| NDUFV3    | -0.0615  | 0.16345  | 0.259962 | 515 | 515 |
| PLEKHG2   | -0.06148 | 0.163571 | 0.260121 | 515 | 515 |
| SPATA17   | -0.06147 | 0.16365  | 0.260204 | 515 | 510 |
| TTY1B     | -0.06144 | 0.163873 | 0.260494 | 515 | 7   |
| ARL2      | -0.06144 | 0.163884 | 0.260494 | 515 | 515 |
| C22orf40  | -0.06143 | 0.163906 | 0.260509 | 515 | 515 |
| PIRT      | -0.06142 | 0.163977 | 0.26058  | 515 | 140 |
| UCP1      | -0.06138 | 0.164244 | 0.2609   | 515 | 98  |
| SUCLA2    | -0.06133 | 0.164612 | 0.261443 | 515 | 515 |
| LOC100130 | -0.06129 | 0.164865 | 0.261782 | 515 | 499 |
| UPF2      | -0.06126 | 0.165105 | 0.262144 | 515 | 515 |
| PRDM10    | -0.06125 | 0.165139 | 0.262176 | 515 | 515 |
| SMARCA4   | -0.0612  | 0.165488 | 0.262647 | 515 | 515 |
| SLC35F1   | -0.0612  | 0.165509 | 0.26266  | 515 | 506 |
| EFHA1     | -0.06117 | 0.165721 | 0.262933 | 515 | 515 |
| ZBTB3     | -0.06113 | 0.165982 | 0.263243 | 515 | 515 |
| HSP90AB4F | -0.06111 | 0.166132 | 0.26346  | 515 | 400 |
| ACCN5     | -0.0611  | 0.166208 | 0.263538 | 515 | 140 |
| RAF1      | -0.06102 | 0.16676  | 0.26433  | 515 | 515 |
| ODZ1      | -0.06102 | 0.166791 | 0.264347 | 515 | 514 |
| MGC12982  | -0.06101 | 0.166815 | 0.264354 | 515 | 515 |

|           |          |          |          |     |     |
|-----------|----------|----------|----------|-----|-----|
| TMEM25    | -0.06099 | 0.16696  | 0.264542 | 515 | 515 |
| XPOT      | -0.06096 | 0.16716  | 0.264796 | 515 | 515 |
| KIAA1737  | -0.06095 | 0.167257 | 0.264928 | 515 | 515 |
| PRAMEF12  | -0.06093 | 0.167411 | 0.265152 | 515 | 35  |
| GADD45GIF | -0.06092 | 0.167493 | 0.26526  | 515 | 515 |
| C21orf88  | -0.0609  | 0.167628 | 0.265433 | 515 | 297 |
| GRIA2     | -0.06089 | 0.167637 | 0.265433 | 515 | 278 |
| CA12      | -0.06088 | 0.167767 | 0.26561  | 515 | 515 |
| CSAG3     | -0.06085 | 0.167928 | 0.265821 | 515 | 323 |
| TMEM216   | -0.06085 | 0.167956 | 0.265825 | 515 | 515 |
| SNX22     | -0.06084 | 0.168033 | 0.265884 | 515 | 515 |
| PSG2      | -0.06081 | 0.168195 | 0.266077 | 515 | 29  |
| PPM1L     | -0.06081 | 0.168234 | 0.266096 | 515 | 515 |
| GLB1L     | -0.0608  | 0.168286 | 0.266158 | 515 | 515 |
| MAPK1     | -0.0608  | 0.168328 | 0.266203 | 515 | 515 |
| UGT1A4    | -0.06079 | 0.168377 | 0.266259 | 515 | 77  |
| HPS6      | -0.06074 | 0.168717 | 0.266706 | 515 | 515 |
| CDX2      | -0.06073 | 0.168819 | 0.266832 | 515 | 334 |
| PRDX3     | -0.06072 | 0.168869 | 0.266885 | 515 | 515 |
| LOC219347 | -0.06064 | 0.169421 | 0.267614 | 515 | 515 |
| PTMS      | -0.06061 | 0.169645 | 0.267925 | 515 | 515 |
| UNG       | -0.06058 | 0.169827 | 0.26817  | 515 | 515 |
| LOC441294 | -0.06057 | 0.169926 | 0.268299 | 515 | 514 |
| C17orf69  | -0.06057 | 0.169936 | 0.268299 | 515 | 515 |
| SPACA5    | -0.06056 | 0.17     | 0.268366 | 515 | 196 |
| C14orf179 | -0.06056 | 0.170005 | 0.268366 | 515 | 515 |
| E2F5      | -0.06055 | 0.17009  | 0.268461 | 515 | 515 |
| C17orf81  | -0.06054 | 0.170105 | 0.268461 | 515 | 515 |
| KIF12     | -0.06054 | 0.170163 | 0.268532 | 515 | 512 |
| LOC100133 | -0.06051 | 0.170312 | 0.268723 | 515 | 140 |
| EIF2S3    | -0.06049 | 0.170462 | 0.26894  | 515 | 515 |
| ACMSD     | -0.06048 | 0.17057  | 0.269028 | 515 | 402 |
| SGK2      | -0.06048 | 0.170586 | 0.269028 | 515 | 512 |
| ELOVL1    | -0.06047 | 0.170599 | 0.269028 | 515 | 515 |
| LRCH4     | -0.06047 | 0.170615 | 0.269032 | 515 | 515 |
| MRPL52    | -0.06044 | 0.170826 | 0.269343 | 515 | 515 |
| psiTPTE22 | -0.0604  | 0.171151 | 0.269792 | 515 | 515 |
| COX17     | -0.06038 | 0.171266 | 0.269888 | 515 | 515 |
| ZMYND17   | -0.06033 | 0.17161  | 0.270409 | 515 | 515 |
| KRTAP1-3  | -0.06025 | 0.172213 | 0.271316 | 515 | 23  |
| ORAOV1    | -0.06023 | 0.172329 | 0.271478 | 515 | 515 |
| RPRML     | -0.06023 | 0.172356 | 0.271499 | 515 | 382 |
| GABRA1    | -0.06022 | 0.172407 | 0.271559 | 515 | 80  |
| TBL2      | -0.06021 | 0.172503 | 0.271667 | 515 | 515 |
| ZDHHC8    | -0.06019 | 0.172644 | 0.271824 | 515 | 515 |
| SOX3      | -0.06013 | 0.173049 | 0.272419 | 515 | 173 |
| FAM150A   | -0.06006 | 0.173513 | 0.273063 | 515 | 483 |
| CTNNA3    | -0.06006 | 0.173562 | 0.273098 | 515 | 276 |
| SULT2A1   | -0.06003 | 0.173734 | 0.273347 | 515 | 22  |
| MESDC1    | -0.06003 | 0.173793 | 0.273418 | 515 | 515 |
| KRTAP4-1  | -0.05993 | 0.174485 | 0.274355 | 515 | 349 |
| HOXA11    | -0.05988 | 0.174832 | 0.274836 | 515 | 359 |
| CCDC127   | -0.05983 | 0.175167 | 0.275319 | 515 | 515 |
| IGSF1     | -0.0597  | 0.176119 | 0.276598 | 515 | 480 |

|           |          |          |          |     |     |
|-----------|----------|----------|----------|-----|-----|
| LOC285692 | -0.0597  | 0.176144 | 0.276616 | 515 | 46  |
| C8orf86   | -0.0597  | 0.176163 | 0.276624 | 515 | 59  |
| TMEM65    | -0.05968 | 0.176272 | 0.276752 | 515 | 515 |
| OTUB2     | -0.05967 | 0.176377 | 0.276894 | 515 | 515 |
| PCSK9     | -0.05965 | 0.176538 | 0.277125 | 515 | 514 |
| SLC6A18   | -0.05964 | 0.176561 | 0.27714  | 515 | 134 |
| PRC1      | -0.05958 | 0.177012 | 0.277761 | 515 | 515 |
| VEGFB     | -0.05956 | 0.177158 | 0.277924 | 515 | 515 |
| CTNNA2    | -0.05954 | 0.177296 | 0.278097 | 515 | 336 |
| CRYBB2    | -0.05953 | 0.177355 | 0.278146 | 515 | 402 |
| LPHN1     | -0.05951 | 0.177519 | 0.27827  | 515 | 515 |
| B3GNTL1   | -0.05951 | 0.177523 | 0.27827  | 515 | 515 |
| IP07      | -0.05951 | 0.177532 | 0.27827  | 515 | 515 |
| LOC344967 | -0.0595  | 0.177615 | 0.278379 | 515 | 509 |
| CTPS      | -0.05948 | 0.177727 | 0.27849  | 515 | 515 |
| FBXW10    | -0.05947 | 0.177818 | 0.278593 | 515 | 461 |
| CHST14    | -0.05947 | 0.177821 | 0.278593 | 515 | 515 |
| PAGE4     | -0.05945 | 0.177934 | 0.278749 | 515 | 61  |
| LRFN4     | -0.05943 | 0.178133 | 0.279011 | 515 | 515 |
| ARHGAP36  | -0.05943 | 0.178144 | 0.279011 | 515 | 150 |
| C12orf65  | -0.05942 | 0.178168 | 0.279027 | 515 | 515 |
| NAA11     | -0.05941 | 0.178225 | 0.279073 | 515 | 59  |
| KIAA1383  | -0.0594  | 0.178307 | 0.279179 | 515 | 515 |
| MTHFD2L   | -0.05939 | 0.178407 | 0.279292 | 515 | 515 |
| PSORS1C3  | -0.05938 | 0.178468 | 0.279336 | 515 | 351 |
| ZNF131    | -0.05938 | 0.178477 | 0.279336 | 515 | 515 |
| NFKBIB    | -0.05937 | 0.178536 | 0.279401 | 515 | 515 |
| KIFC2     | -0.0593  | 0.179093 | 0.280023 | 515 | 515 |
| FAM47A    | -0.0593  | 0.179098 | 0.280023 | 515 | 54  |
| C17orf80  | -0.05929 | 0.179166 | 0.280085 | 515 | 515 |
| WDR19     | -0.05927 | 0.179282 | 0.280233 | 515 | 515 |
| TTC32     | -0.05927 | 0.179309 | 0.280243 | 515 | 515 |
| JAKMIP3   | -0.05926 | 0.179358 | 0.280276 | 515 | 504 |
| MTMR15    | -0.05925 | 0.179428 | 0.280341 | 515 | 515 |
| DEPDC6    | -0.05923 | 0.179593 | 0.280577 | 515 | 515 |
| KRTAP9-2  | -0.05922 | 0.17968  | 0.280669 | 515 | 4   |
| ASCL1     | -0.05921 | 0.179754 | 0.280741 | 515 | 466 |
| DOCK7     | -0.05918 | 0.179968 | 0.281031 | 515 | 515 |
| PIP5K1P1  | -0.05916 | 0.180102 | 0.281175 | 515 | 485 |
| C3orf65   | -0.05914 | 0.180212 | 0.281295 | 515 | 173 |
| TBC1D2    | -0.05914 | 0.180221 | 0.281295 | 515 | 515 |
| CD2BP2    | -0.05914 | 0.18027  | 0.281342 | 515 | 515 |
| C11orf87  | -0.05913 | 0.180293 | 0.281342 | 515 | 307 |
| TMEM182   | -0.05913 | 0.180293 | 0.281342 | 515 | 515 |
| DLX1      | -0.0591  | 0.180563 | 0.28174  | 515 | 367 |
| RACGAP1P  | -0.05905 | 0.180913 | 0.282198 | 515 | 478 |
| REXO4     | -0.05905 | 0.180933 | 0.282198 | 515 | 515 |
| INO80D    | -0.05903 | 0.181084 | 0.282377 | 515 | 515 |
| IMPDH1    | -0.05902 | 0.181126 | 0.282398 | 515 | 515 |
| C1orf177  | -0.05901 | 0.181167 | 0.282441 | 515 | 466 |
| ATP5E     | -0.05894 | 0.181697 | 0.283223 | 515 | 515 |
| MYLPF     | -0.05892 | 0.181833 | 0.283413 | 515 | 389 |
| UGT1A3    | -0.05892 | 0.181851 | 0.283418 | 515 | 153 |
| DGKD      | -0.05889 | 0.182083 | 0.28365  | 515 | 515 |

|           |          |          |          |     |     |
|-----------|----------|----------|----------|-----|-----|
| SGCZ      | -0.05889 | 0.182085 | 0.28365  | 515 | 50  |
| RHCE      | -0.05889 | 0.182124 | 0.283688 | 515 | 509 |
| ST6GALNAC | -0.05888 | 0.182182 | 0.283757 | 515 | 515 |
| MAGEC2    | -0.05886 | 0.182335 | 0.283973 | 515 | 232 |
| KRTAP2-2  | -0.05885 | 0.18239  | 0.284037 | 515 | 38  |
| PCDHGB5   | -0.05883 | 0.182513 | 0.284164 | 515 | 515 |
| ZFR       | -0.05882 | 0.182589 | 0.284194 | 515 | 515 |
| STAMBP    | -0.05882 | 0.18259  | 0.284194 | 515 | 515 |
| C16orf80  | -0.05881 | 0.182666 | 0.284289 | 515 | 515 |
| TXNL1     | -0.05881 | 0.182696 | 0.284313 | 515 | 515 |
| LY6K      | -0.0588  | 0.1828   | 0.284453 | 515 | 513 |
| SP8       | -0.05876 | 0.183039 | 0.28476  | 515 | 355 |
| OR8D1     | -0.05875 | 0.183149 | 0.284899 | 515 | 21  |
| ZMAT5     | -0.05875 | 0.183158 | 0.284899 | 515 | 515 |
| MYO18B    | -0.05874 | 0.183228 | 0.284986 | 515 | 378 |
| PEX19     | -0.05872 | 0.183383 | 0.285111 | 515 | 515 |
| P2RX3     | -0.05871 | 0.183399 | 0.285111 | 515 | 166 |
| PFKM      | -0.05871 | 0.183408 | 0.285111 | 515 | 515 |
| PSCA      | -0.05869 | 0.183594 | 0.285357 | 515 | 504 |
| USP37     | -0.05867 | 0.183736 | 0.285514 | 515 | 515 |
| POLB      | -0.05867 | 0.183739 | 0.285514 | 515 | 515 |
| VPS26B    | -0.05865 | 0.183867 | 0.28567  | 515 | 515 |
| SLMO1     | -0.05864 | 0.183939 | 0.285758 | 515 | 515 |
| SLAIN2    | -0.05861 | 0.184147 | 0.286059 | 515 | 515 |
| PRODH     | -0.05861 | 0.184178 | 0.286084 | 515 | 515 |
| B3GNT9    | -0.05858 | 0.184389 | 0.286347 | 515 | 515 |
| THOC2     | -0.05858 | 0.18442  | 0.286373 | 515 | 515 |
| DISP1     | -0.05858 | 0.184446 | 0.28639  | 515 | 515 |
| GHITM     | -0.05857 | 0.184479 | 0.286397 | 515 | 515 |
| ARHGEF38  | -0.05857 | 0.184479 | 0.286397 | 515 | 513 |
| FAM123C   | -0.05856 | 0.184581 | 0.286534 | 515 | 175 |
| LOC100132 | -0.05855 | 0.184612 | 0.28656  | 515 | 512 |
| C19orf29  | -0.05854 | 0.184679 | 0.286627 | 515 | 515 |
| C20orf54  | -0.05852 | 0.184842 | 0.286827 | 515 | 515 |
| KRTAP10-1 | -0.05851 | 0.184967 | 0.287    | 515 | 10  |
| PPEF1     | -0.0585  | 0.184991 | 0.287014 | 515 | 512 |
| CN5H6.4   | -0.0585  | 0.185039 | 0.287064 | 515 | 511 |
| GAPDH     | -0.05849 | 0.185052 | 0.287064 | 515 | 515 |
| VPS11     | -0.05848 | 0.18516  | 0.287209 | 515 | 515 |
| KRTAP19-8 | -0.05844 | 0.185474 | 0.287607 | 515 | 4   |
| DPYSL5    | -0.05842 | 0.185599 | 0.287772 | 515 | 203 |
| ADAMTS18  | -0.05842 | 0.185609 | 0.287772 | 515 | 497 |
| HAP1      | -0.05834 | 0.186191 | 0.288563 | 515 | 499 |
| DDX52     | -0.05829 | 0.18657  | 0.289104 | 515 | 515 |
| TMEM18    | -0.05828 | 0.186695 | 0.289276 | 515 | 515 |
| C16orf91  | -0.0582  | 0.187253 | 0.29005  | 515 | 515 |
| AATF      | -0.05818 | 0.187409 | 0.290225 | 515 | 515 |
| MIER3     | -0.05818 | 0.187451 | 0.290268 | 515 | 515 |
| BAP1      | -0.05817 | 0.187519 | 0.290327 | 515 | 515 |
| TERF2     | -0.05814 | 0.187712 | 0.290536 | 515 | 515 |
| BOLA2     | -0.05811 | 0.187954 | 0.290889 | 515 | 515 |
| MCCD1     | -0.05811 | 0.187978 | 0.290904 | 515 | 143 |
| CNOT7     | -0.0581  | 0.188038 | 0.290974 | 515 | 515 |
| SLC16A11  | -0.0581  | 0.188075 | 0.291008 | 515 | 515 |



|           |          |          |          |     |     |
|-----------|----------|----------|----------|-----|-----|
| C10orf40  | -0.05808 | 0.188223 | 0.291191 | 515 | 36  |
| CDHR5     | -0.05805 | 0.188448 | 0.291465 | 515 | 448 |
| KCNJ6     | -0.05804 | 0.188458 | 0.291465 | 515 | 382 |
| LOC285629 | -0.05804 | 0.188474 | 0.291468 | 515 | 500 |
| ZNF19     | -0.05803 | 0.18858  | 0.291609 | 515 | 515 |
| C10orf90  | -0.05802 | 0.188625 | 0.291655 | 515 | 290 |
| C1orf111  | -0.05802 | 0.188669 | 0.291702 | 515 | 435 |
| NOBOX     | -0.05801 | 0.1887   | 0.291727 | 515 | 10  |
| MCM7      | -0.05799 | 0.18891  | 0.291997 | 515 | 515 |
| SLC29A1   | -0.05795 | 0.189192 | 0.292352 | 515 | 515 |
| CROCC     | -0.05793 | 0.189307 | 0.292506 | 515 | 515 |
| REG1A     | -0.05792 | 0.189443 | 0.292672 | 515 | 221 |
| CXXC1     | -0.0579  | 0.189559 | 0.292806 | 515 | 515 |
| PKD1L2    | -0.05789 | 0.189618 | 0.292875 | 515 | 498 |
| NDUFA4L2  | -0.05788 | 0.189696 | 0.292904 | 515 | 515 |
| MRPL15    | -0.05787 | 0.189768 | 0.29297  | 515 | 515 |
| LMNB2     | -0.05786 | 0.189892 | 0.293073 | 515 | 515 |
| HIST1H2BL | -0.05782 | 0.190168 | 0.293384 | 515 | 438 |
| HIST1H2AH | -0.05781 | 0.190237 | 0.293453 | 515 | 286 |
| RBM45     | -0.05781 | 0.190256 | 0.293453 | 515 | 515 |
| RNF44     | -0.0578  | 0.190308 | 0.293509 | 515 | 515 |
| CSNK1A1L  | -0.05778 | 0.190504 | 0.293743 | 515 | 483 |
| PPP1R7    | -0.05775 | 0.190735 | 0.294032 | 515 | 515 |
| COX6B2    | -0.05774 | 0.190755 | 0.29404  | 515 | 492 |
| C2orf64   | -0.05771 | 0.19105  | 0.294471 | 515 | 515 |
| CCNI2     | -0.0576  | 0.191903 | 0.295672 | 515 | 513 |
| CMAS      | -0.05759 | 0.19194  | 0.295686 | 515 | 515 |
| TSPAN1    | -0.05759 | 0.191956 | 0.295686 | 515 | 515 |
| TEX13A    | -0.05752 | 0.192486 | 0.296411 | 515 | 12  |
| ARRDC1    | -0.05746 | 0.192937 | 0.297036 | 515 | 515 |
| C8orf77   | -0.05745 | 0.193021 | 0.297118 | 515 | 510 |
| UBL4A     | -0.05744 | 0.19315  | 0.29725  | 515 | 515 |
| SPANXN5   | -0.05741 | 0.193309 | 0.297428 | 515 | 15  |
| ORMDL3    | -0.05741 | 0.193332 | 0.297429 | 515 | 515 |
| RPS8      | -0.05741 | 0.193341 | 0.297429 | 515 | 515 |
| HSFY1     | -0.05738 | 0.193591 | 0.297746 | 515 | 4   |
| FAM120C   | -0.05736 | 0.193722 | 0.297924 | 515 | 515 |
| KCNH5     | -0.05734 | 0.193918 | 0.298202 | 515 | 136 |
| C9orf163  | -0.05724 | 0.194642 | 0.299154 | 515 | 509 |
| CT62      | -0.05716 | 0.195315 | 0.299929 | 515 | 330 |
| GMPR2     | -0.05716 | 0.195326 | 0.299929 | 515 | 515 |
| CSPP1     | -0.05714 | 0.195459 | 0.300111 | 515 | 515 |
| VGLL2     | -0.05713 | 0.195512 | 0.300169 | 515 | 149 |
| C6orf129  | -0.05712 | 0.195581 | 0.300251 | 515 | 515 |
| CRYBA1    | -0.05709 | 0.19581  | 0.300522 | 515 | 94  |
| SMG6      | -0.05709 | 0.195875 | 0.300588 | 515 | 515 |
| MORF4L2   | -0.05706 | 0.196041 | 0.300796 | 515 | 515 |
| NCRNA0017 | -0.05704 | 0.196224 | 0.300984 | 515 | 514 |
| CCDC106   | -0.05703 | 0.196289 | 0.30106  | 515 | 515 |
| LOC100128 | -0.05703 | 0.196352 | 0.301108 | 515 | 513 |
| CDT1      | -0.05699 | 0.196638 | 0.301457 | 515 | 515 |
| C20orf3   | -0.05693 | 0.197091 | 0.302059 | 515 | 515 |
| OVCA2     | -0.05684 | 0.197822 | 0.303017 | 515 | 515 |
| DMRTA2    | -0.05682 | 0.19798  | 0.303212 | 515 | 435 |

|           |          |          |          |     |     |
|-----------|----------|----------|----------|-----|-----|
| C20orf152 | -0.0568  | 0.198127 | 0.30336  | 515 | 432 |
| LOC100128 | -0.0568  | 0.198137 | 0.30336  | 515 | 515 |
| TNPO2     | -0.05678 | 0.198261 | 0.303502 | 515 | 515 |
| B4GALT5   | -0.05678 | 0.198275 | 0.303502 | 515 | 515 |
| LPGAT1    | -0.05672 | 0.198797 | 0.304114 | 515 | 515 |
| CCT8      | -0.05671 | 0.19884  | 0.304157 | 515 | 515 |
| SNAPC4    | -0.05668 | 0.199068 | 0.304436 | 515 | 515 |
| CWC22     | -0.05666 | 0.199246 | 0.304684 | 515 | 515 |
| MAP3K11   | -0.05664 | 0.199358 | 0.304832 | 515 | 515 |
| TTC35     | -0.05661 | 0.199635 | 0.305203 | 515 | 515 |
| FGF22     | -0.05661 | 0.199642 | 0.305203 | 515 | 140 |
| PIP4K2B   | -0.05661 | 0.199661 | 0.305203 | 515 | 515 |
| ZNF500    | -0.0566  | 0.199734 | 0.305268 | 515 | 515 |
| TATDN1    | -0.05657 | 0.199953 | 0.305508 | 515 | 515 |
| PSMC3IP   | -0.0565  | 0.200498 | 0.306247 | 515 | 515 |
| ZC3H13    | -0.05646 | 0.200813 | 0.306635 | 515 | 515 |
| OTX2      | -0.05646 | 0.200857 | 0.306678 | 515 | 140 |
| GCLC      | -0.05645 | 0.200885 | 0.306698 | 515 | 515 |
| C5orf60   | -0.05644 | 0.200955 | 0.306781 | 515 | 221 |
| CTNNBIP1  | -0.05642 | 0.201133 | 0.307006 | 515 | 515 |
| ARL6IP4   | -0.05639 | 0.201369 | 0.30733  | 515 | 515 |
| ZNF69     | -0.05638 | 0.201471 | 0.307451 | 515 | 515 |
| PIGX      | -0.05635 | 0.20173  | 0.30782  | 515 | 515 |
| TRAPPC6A  | -0.05635 | 0.201743 | 0.30782  | 515 | 515 |
| KHSRP     | -0.05624 | 0.202591 | 0.309018 | 515 | 515 |
| DDIT4L    | -0.05623 | 0.202701 | 0.309139 | 515 | 515 |
| PRAMEF6   | -0.05621 | 0.202823 | 0.309302 | 515 | 13  |
| SPDYA     | -0.0562  | 0.202943 | 0.309445 | 515 | 515 |
| BEYLA     | -0.05619 | 0.203033 | 0.309551 | 515 | 6   |
| MESP2     | -0.05617 | 0.203152 | 0.309709 | 515 | 504 |
| GUCY2C    | -0.05615 | 0.203327 | 0.309953 | 515 | 493 |
| LIN7B     | -0.05613 | 0.203511 | 0.310186 | 515 | 515 |
| RPL3      | -0.0561  | 0.203754 | 0.310533 | 515 | 515 |
| NPHS2     | -0.05608 | 0.20387  | 0.310686 | 515 | 62  |
| MS4A5     | -0.05602 | 0.204351 | 0.3113   | 515 | 5   |
| TIMM8B    | -0.05599 | 0.204599 | 0.311606 | 515 | 515 |
| PSMC3     | -0.05599 | 0.204599 | 0.311606 | 515 | 515 |
| FAM134C   | -0.05597 | 0.204812 | 0.311835 | 515 | 515 |
| C1orf55   | -0.05594 | 0.205001 | 0.312026 | 515 | 515 |
| MAGEA11   | -0.05592 | 0.205196 | 0.312277 | 515 | 147 |
| PKD1      | -0.05591 | 0.205233 | 0.31231  | 515 | 515 |
| SCRN2     | -0.0559  | 0.205321 | 0.312421 | 515 | 515 |
| OR56A4    | -0.05588 | 0.205469 | 0.312622 | 515 | 19  |
| PDCD2L    | -0.05586 | 0.205665 | 0.312881 | 515 | 515 |
| EMG1      | -0.05586 | 0.20567  | 0.312881 | 515 | 515 |
| ZBTB48    | -0.05585 | 0.205753 | 0.312946 | 515 | 515 |
| LOC727896 | -0.05585 | 0.20576  | 0.312946 | 515 | 515 |
| UGT2B7    | -0.05584 | 0.205844 | 0.31305  | 515 | 429 |
| SYT10     | -0.05582 | 0.205972 | 0.313162 | 515 | 118 |
| GAL3ST2   | -0.05581 | 0.206078 | 0.313263 | 515 | 398 |
| MRAP2     | -0.0558  | 0.206149 | 0.313347 | 515 | 499 |
| HIST1H2BE | -0.05578 | 0.206314 | 0.313574 | 515 | 132 |
| PPP2R5A   | -0.05576 | 0.2065   | 0.313818 | 515 | 515 |
| TSPY2     | -0.05574 | 0.206681 | 0.314028 | 515 | 28  |

|           |          |          |          |     |     |
|-----------|----------|----------|----------|-----|-----|
| KIAA0467  | -0.05572 | 0.206784 | 0.314121 | 515 | 515 |
| PNPT1     | -0.05569 | 0.207033 | 0.314473 | 515 | 515 |
| ADRA2C    | -0.05568 | 0.207145 | 0.314574 | 515 | 512 |
| TXN       | -0.05565 | 0.207404 | 0.31492  | 515 | 515 |
| TRMU      | -0.05563 | 0.207509 | 0.31503  | 515 | 515 |
| MAP3K10   | -0.05558 | 0.207982 | 0.315605 | 515 | 515 |
| PSG10     | -0.05556 | 0.208076 | 0.3157   | 515 | 20  |
| USP8      | -0.05549 | 0.208681 | 0.316449 | 515 | 515 |
| EIF2C2    | -0.05549 | 0.208714 | 0.316451 | 515 | 515 |
| AIMP1     | -0.05546 | 0.208962 | 0.316804 | 515 | 515 |
| HMGXB4    | -0.05544 | 0.209089 | 0.316947 | 515 | 515 |
| RPL30     | -0.05544 | 0.209123 | 0.316974 | 515 | 515 |
| PLEKHA5   | -0.05541 | 0.209308 | 0.317186 | 515 | 515 |
| PTH2R     | -0.05541 | 0.20931  | 0.317186 | 515 | 443 |
| ZCCHC13   | -0.0554  | 0.209432 | 0.317323 | 515 | 6   |
| HADHA     | -0.05537 | 0.20971  | 0.317696 | 515 | 515 |
| KIAA1530  | -0.05535 | 0.209868 | 0.317911 | 515 | 515 |
| CLUL1     | -0.05534 | 0.20994  | 0.317984 | 515 | 507 |
| RFC1      | -0.05532 | 0.21006  | 0.318081 | 515 | 515 |
| SLC2A4    | -0.05528 | 0.210393 | 0.318562 | 515 | 515 |
| FAM110C   | -0.05527 | 0.210501 | 0.318677 | 515 | 500 |
| DNALI1    | -0.05527 | 0.210529 | 0.318696 | 515 | 515 |
| CLOCK     | -0.05524 | 0.210755 | 0.318941 | 515 | 515 |
| HIST1H2AE | -0.05521 | 0.211029 | 0.319259 | 515 | 218 |
| CRY2      | -0.0552  | 0.211119 | 0.319371 | 515 | 515 |
| PDZK1P1   | -0.05517 | 0.211327 | 0.319636 | 515 | 513 |
| OR2F2     | -0.05515 | 0.211465 | 0.319822 | 515 | 6   |
| C9orf27   | -0.05513 | 0.211701 | 0.32013  | 515 | 6   |
| NR4A2     | -0.05511 | 0.211792 | 0.320243 | 515 | 515 |
| TPO       | -0.05508 | 0.212087 | 0.320631 | 515 | 327 |
| MAN2C1    | -0.05508 | 0.212097 | 0.320631 | 515 | 515 |
| RIBC1     | -0.05507 | 0.21217  | 0.320694 | 515 | 514 |
| CCDC64    | -0.05505 | 0.212355 | 0.3209   | 515 | 515 |
| RPL29     | -0.05504 | 0.212421 | 0.320976 | 515 | 515 |
| MORN1     | -0.05503 | 0.212532 | 0.321096 | 515 | 515 |
| WFDC8     | -0.05499 | 0.212816 | 0.321476 | 515 | 63  |
| SNAP29    | -0.05499 | 0.212837 | 0.321483 | 515 | 515 |
| SLC25A38  | -0.05496 | 0.213117 | 0.321858 | 515 | 515 |
| ADAM9     | -0.05494 | 0.213204 | 0.321964 | 515 | 515 |
| MED4      | -0.05493 | 0.213308 | 0.322073 | 515 | 515 |
| GPI       | -0.05493 | 0.21333  | 0.322082 | 515 | 515 |
| ZNF670    | -0.05491 | 0.213535 | 0.322342 | 515 | 515 |
| NOMO2     | -0.05488 | 0.213767 | 0.32262  | 515 | 515 |
| AGAP4     | -0.05487 | 0.213795 | 0.322638 | 515 | 515 |
| SIX6      | -0.05486 | 0.213936 | 0.322812 | 515 | 110 |
| LYZL2     | -0.05486 | 0.213943 | 0.322812 | 515 | 55  |
| FBXL21    | -0.05485 | 0.213985 | 0.322851 | 515 | 127 |
| PF4       | -0.05485 | 0.214006 | 0.322859 | 515 | 394 |
| GBAP1     | -0.05483 | 0.214126 | 0.32299  | 515 | 515 |
| RPL29P2   | -0.05482 | 0.214223 | 0.323064 | 515 | 293 |
| CDRT15    | -0.0548  | 0.214392 | 0.323271 | 515 | 70  |
| TAC1      | -0.05479 | 0.214513 | 0.323428 | 515 | 146 |
| C12orf36  | -0.05477 | 0.214652 | 0.323613 | 515 | 359 |
| KLHDC4    | -0.05477 | 0.214679 | 0.32363  | 515 | 515 |

|           |          |          |          |     |     |
|-----------|----------|----------|----------|-----|-----|
| KIAA1468  | -0.05476 | 0.214751 | 0.323713 | 515 | 515 |
| LOC100192 | -0.05471 | 0.215142 | 0.324254 | 515 | 165 |
| OR14C36   | -0.05467 | 0.215519 | 0.324773 | 515 | 6   |
| FGGY      | -0.05465 | 0.215682 | 0.324945 | 515 | 515 |
| PRDM9     | -0.05464 | 0.215744 | 0.325001 | 515 | 116 |
| TRPM4     | -0.05464 | 0.215751 | 0.325001 | 515 | 515 |
| PRRT1     | -0.05464 | 0.215787 | 0.325004 | 515 | 515 |
| FAM109B   | -0.05463 | 0.215802 | 0.325004 | 515 | 515 |
| OR8B12    | -0.05458 | 0.21623  | 0.325501 | 515 | 8   |
| IRGC      | -0.05458 | 0.216265 | 0.32553  | 515 | 179 |
| CDK20     | -0.05457 | 0.216334 | 0.325566 | 515 | 515 |
| IREB2     | -0.05457 | 0.216342 | 0.325566 | 515 | 515 |
| NPHP1     | -0.05455 | 0.216512 | 0.325754 | 515 | 515 |
| TGM6      | -0.05451 | 0.216841 | 0.326194 | 515 | 11  |
| PPP1R1A   | -0.05451 | 0.216853 | 0.326194 | 515 | 474 |
| TMEM116   | -0.05446 | 0.217295 | 0.32676  | 515 | 515 |
| MRPS33    | -0.05445 | 0.217401 | 0.326828 | 515 | 515 |
| IQCF6     | -0.05444 | 0.217463 | 0.326889 | 515 | 84  |
| HSD17B12  | -0.05444 | 0.217485 | 0.326898 | 515 | 515 |
| SCAPER    | -0.05442 | 0.217646 | 0.327115 | 515 | 515 |
| LOC392196 | -0.05437 | 0.218033 | 0.327647 | 515 | 53  |
| TBX20     | -0.05431 | 0.218585 | 0.328378 | 515 | 161 |
| SEMA4C    | -0.05423 | 0.219243 | 0.329243 | 515 | 515 |
| OR13C5    | -0.05421 | 0.219381 | 0.329425 | 515 | 21  |
| C9orf9    | -0.05418 | 0.219662 | 0.329791 | 515 | 515 |
| TLK2      | -0.05417 | 0.219697 | 0.329801 | 515 | 515 |
| DCX       | -0.05415 | 0.219871 | 0.329988 | 515 | 220 |
| TUBGCP5   | -0.05415 | 0.219934 | 0.330017 | 515 | 515 |
| FER1L6    | -0.05414 | 0.219951 | 0.330017 | 515 | 404 |
| HMX2      | -0.05412 | 0.220205 | 0.330315 | 515 | 176 |
| LY6G5C    | -0.0541  | 0.220333 | 0.330484 | 515 | 515 |
| TNFRSF1A  | -0.05405 | 0.220803 | 0.33103  | 515 | 515 |
| C12orf57  | -0.05404 | 0.22082  | 0.33103  | 515 | 515 |
| GABARAP   | -0.05404 | 0.220854 | 0.331041 | 515 | 515 |
| NAPG      | -0.05404 | 0.220876 | 0.331049 | 515 | 515 |
| MARS2     | -0.05403 | 0.220931 | 0.331079 | 515 | 515 |
| SLC35B3   | -0.05401 | 0.22113  | 0.331306 | 515 | 515 |
| VENTXP7   | -0.05399 | 0.221285 | 0.331513 | 515 | 16  |
| SAMM50    | -0.05396 | 0.221506 | 0.331819 | 515 | 515 |
| MMD2      | -0.05393 | 0.221822 | 0.332218 | 515 | 49  |
| STXBP4    | -0.05392 | 0.221905 | 0.332317 | 515 | 515 |
| OR2J3     | -0.0539  | 0.22201  | 0.332425 | 515 | 51  |
| FBXL22    | -0.05387 | 0.222282 | 0.332807 | 515 | 515 |
| BCL2L13   | -0.05387 | 0.22231  | 0.332825 | 515 | 515 |
| C20orf199 | -0.05385 | 0.222447 | 0.332955 | 515 | 515 |
| VPS37C    | -0.05383 | 0.222687 | 0.333185 | 515 | 515 |
| ACAT2     | -0.05382 | 0.222699 | 0.333185 | 515 | 515 |
| CDKAL1    | -0.05382 | 0.222701 | 0.333185 | 515 | 515 |
| CDH4      | -0.05381 | 0.222856 | 0.333292 | 515 | 452 |
| MGC72080  | -0.0538  | 0.222877 | 0.333298 | 515 | 515 |
| CALML5    | -0.0537  | 0.223746 | 0.334472 | 515 | 310 |
| TTC39C    | -0.05369 | 0.223847 | 0.334599 | 515 | 515 |
| AP1G2     | -0.05368 | 0.223967 | 0.3347   | 515 | 515 |
| NNT       | -0.05368 | 0.223968 | 0.3347   | 515 | 515 |

|           |          |          |          |     |     |
|-----------|----------|----------|----------|-----|-----|
| PCSK6     | -0.05368 | 0.223982 | 0.3347   | 515 | 515 |
| TAX1BP1   | -0.05367 | 0.224028 | 0.334735 | 515 | 515 |
| LOC387646 | -0.05367 | 0.224039 | 0.334735 | 515 | 514 |
| NUP50     | -0.05362 | 0.22445  | 0.335252 | 515 | 515 |
| C20orf43  | -0.05362 | 0.224452 | 0.335252 | 515 | 515 |
| NEU1      | -0.05361 | 0.224543 | 0.335363 | 515 | 515 |
| LOC100131 | -0.05359 | 0.224764 | 0.335619 | 515 | 502 |
| HTATIP2   | -0.05353 | 0.225233 | 0.336143 | 515 | 515 |
| STK16     | -0.05352 | 0.225346 | 0.336251 | 515 | 515 |
| RPL23A    | -0.05352 | 0.225348 | 0.336251 | 515 | 515 |
| C3orf77   | -0.05351 | 0.225443 | 0.336355 | 515 | 28  |
| OTOR      | -0.0535  | 0.225512 | 0.336433 | 515 | 145 |
| ZNF133    | -0.05349 | 0.225565 | 0.336487 | 515 | 515 |
| PRSS41    | -0.05349 | 0.225617 | 0.33651  | 515 | 136 |
| FASTKD2   | -0.05343 | 0.226084 | 0.33716  | 515 | 515 |
| SLCO1B1   | -0.05343 | 0.226102 | 0.337162 | 515 | 221 |
| GPR137C   | -0.05343 | 0.226149 | 0.337204 | 515 | 515 |
| PFKFB1    | -0.05342 | 0.226164 | 0.337204 | 515 | 426 |
| C11orf30  | -0.05341 | 0.226255 | 0.337315 | 515 | 515 |
| FAM75A3   | -0.05338 | 0.22657  | 0.337684 | 515 | 45  |
| DRG1      | -0.05336 | 0.226746 | 0.337845 | 515 | 515 |
| ATP2B3    | -0.05334 | 0.226851 | 0.337953 | 515 | 277 |
| MMP17     | -0.05334 | 0.226905 | 0.338006 | 515 | 515 |
| PGK2      | -0.05333 | 0.226966 | 0.338072 | 515 | 164 |
| ASB10     | -0.0533  | 0.227232 | 0.338444 | 515 | 67  |
| SRRM1     | -0.05328 | 0.22745  | 0.338717 | 515 | 515 |
| CHRNA3    | -0.05327 | 0.227502 | 0.33877  | 515 | 508 |
| HOOK3     | -0.05323 | 0.227814 | 0.339159 | 515 | 515 |
| PSG7      | -0.05323 | 0.227855 | 0.339194 | 515 | 20  |
| GAB4      | -0.05323 | 0.227888 | 0.339218 | 515 | 72  |
| FAM73A    | -0.05322 | 0.22795  | 0.339285 | 515 | 515 |
| C20orf7   | -0.05321 | 0.228022 | 0.339367 | 515 | 515 |
| MAGEA4    | -0.0532  | 0.228077 | 0.339425 | 515 | 194 |
| GKN1      | -0.05319 | 0.228187 | 0.339552 | 515 | 65  |
| FUBP1     | -0.05318 | 0.228319 | 0.339682 | 515 | 515 |
| LOC284900 | -0.05312 | 0.228792 | 0.34026  | 515 | 515 |
| CTU2      | -0.05312 | 0.228846 | 0.340315 | 515 | 515 |
| PREB      | -0.05311 | 0.228951 | 0.340446 | 515 | 515 |
| CABP2     | -0.05309 | 0.229123 | 0.340651 | 515 | 8   |
| POTEF     | -0.05307 | 0.2293   | 0.340877 | 515 | 513 |
| NAT2      | -0.05304 | 0.229513 | 0.341104 | 515 | 491 |
| DGCR6L    | -0.05303 | 0.229639 | 0.34124  | 515 | 515 |
| KRTAP5-2  | -0.05302 | 0.22969  | 0.341276 | 515 | 352 |
| SNORA15   | -0.05302 | 0.229697 | 0.341276 | 515 | 18  |
| LOC339240 | -0.05301 | 0.229813 | 0.341372 | 515 | 190 |
| TUBB4Q    | -0.053   | 0.229914 | 0.341497 | 515 | 462 |
| NRXN3     | -0.05299 | 0.229958 | 0.341532 | 515 | 515 |
| OR52I1    | -0.05295 | 0.23034  | 0.342003 | 515 | 101 |
| FAM22F    | -0.05292 | 0.230557 | 0.342273 | 515 | 485 |
| STK38     | -0.05291 | 0.23067  | 0.342416 | 515 | 515 |
| ROPN1     | -0.05288 | 0.230968 | 0.342781 | 515 | 401 |
| PPP2R2C   | -0.05287 | 0.231015 | 0.342826 | 515 | 511 |
| UBE2MP1   | -0.05278 | 0.231845 | 0.343879 | 515 | 515 |
| ZDHHC5    | -0.05277 | 0.231903 | 0.343918 | 515 | 515 |

|           |          |          |          |     |     |
|-----------|----------|----------|----------|-----|-----|
| EXD1      | -0.05277 | 0.231906 | 0.343918 | 515 | 406 |
| SCYL3     | -0.05277 | 0.231934 | 0.343935 | 515 | 515 |
| PGLS      | -0.05275 | 0.232043 | 0.344045 | 515 | 515 |
| CTNND2    | -0.05275 | 0.232108 | 0.344116 | 515 | 473 |
| SHOX      | -0.05273 | 0.23229  | 0.344334 | 515 | 19  |
| OR52L1    | -0.05267 | 0.2328   | 0.345039 | 515 | 48  |
| DHRX      | -0.05266 | 0.232911 | 0.345179 | 515 | 515 |
| BARX2     | -0.05262 | 0.233221 | 0.345586 | 515 | 514 |
| USP3      | -0.05258 | 0.233624 | 0.346158 | 515 | 515 |
| GUCY2GP   | -0.05254 | 0.233963 | 0.346558 | 515 | 144 |
| ABCA17P   | -0.05253 | 0.234059 | 0.346649 | 515 | 499 |
| DNAJC30   | -0.05252 | 0.234138 | 0.346714 | 515 | 515 |
| AGAP8     | -0.05251 | 0.234219 | 0.346755 | 515 | 515 |
| SCFD2     | -0.0525  | 0.234262 | 0.346755 | 515 | 515 |
| NELL1     | -0.0525  | 0.23427  | 0.346755 | 515 | 383 |
| CNIH2     | -0.0525  | 0.234325 | 0.346812 | 515 | 514 |
| CDC34     | -0.05248 | 0.234464 | 0.346991 | 515 | 515 |
| INGX      | -0.05246 | 0.23468  | 0.347259 | 515 | 409 |
| LOC100134 | -0.05244 | 0.23487  | 0.34749  | 515 | 491 |
| KLK9      | -0.05241 | 0.235108 | 0.347779 | 515 | 129 |
| TMEM91    | -0.05241 | 0.235118 | 0.347779 | 515 | 515 |
| SNX5      | -0.05238 | 0.235341 | 0.347954 | 515 | 515 |
| ZHX3      | -0.05237 | 0.235498 | 0.348134 | 515 | 515 |
| FUNDC1    | -0.05235 | 0.235635 | 0.348288 | 515 | 515 |
| UBE2T     | -0.05235 | 0.235636 | 0.348288 | 515 | 515 |
| ONECUT3   | -0.05231 | 0.235994 | 0.348739 | 515 | 72  |
| KCTD21    | -0.05231 | 0.236034 | 0.348773 | 515 | 515 |
| ANKRD13B  | -0.05228 | 0.236231 | 0.349011 | 515 | 515 |
| RPS6KA2   | -0.05227 | 0.23639  | 0.349169 | 515 | 515 |
| ATP5J     | -0.05225 | 0.23654  | 0.349365 | 515 | 515 |
| C17orf95  | -0.05223 | 0.236722 | 0.349583 | 515 | 515 |
| RICTOR    | -0.05223 | 0.236768 | 0.349613 | 515 | 515 |
| HIST1H1E  | -0.05222 | 0.236806 | 0.349613 | 515 | 496 |
| NFYA      | -0.05222 | 0.23681  | 0.349613 | 515 | 515 |
| FMR1NB    | -0.0522  | 0.236967 | 0.349737 | 515 | 123 |
| DLX3      | -0.05219 | 0.237065 | 0.349856 | 515 | 503 |
| SPP2      | -0.05217 | 0.237249 | 0.350076 | 515 | 339 |
| OR2K2     | -0.05217 | 0.237275 | 0.350089 | 515 | 138 |
| HGFAC     | -0.05216 | 0.237355 | 0.350155 | 515 | 423 |
| BBS4      | -0.05211 | 0.237774 | 0.350748 | 515 | 515 |
| UGT2B10   | -0.05209 | 0.238    | 0.351003 | 515 | 185 |
| HIST2H2AA | -0.05207 | 0.238204 | 0.351174 | 515 | 515 |
| UBXN2A    | -0.05206 | 0.23825  | 0.351217 | 515 | 515 |
| ANKRD33   | -0.05204 | 0.238406 | 0.351394 | 515 | 328 |
| UBE2Q2P1  | -0.05203 | 0.23856  | 0.351569 | 515 | 515 |
| RPL10A    | -0.05202 | 0.238614 | 0.351623 | 515 | 515 |
| DUXA      | -0.05202 | 0.238659 | 0.351664 | 515 | 86  |
| MAP2K4    | -0.05199 | 0.238851 | 0.351895 | 515 | 515 |
| TEAD2     | -0.05199 | 0.238874 | 0.351902 | 515 | 515 |
| SLC28A1   | -0.05198 | 0.238947 | 0.351984 | 515 | 417 |
| PLEKHA6   | -0.05197 | 0.239046 | 0.352103 | 515 | 515 |
| NCAPD2    | -0.05196 | 0.239114 | 0.352179 | 515 | 515 |
| CCDC45    | -0.05191 | 0.239643 | 0.352854 | 515 | 515 |
| C19orf46  | -0.0519  | 0.239743 | 0.352949 | 515 | 515 |

|           |          |          |          |     |     |
|-----------|----------|----------|----------|-----|-----|
| DPPA2     | -0.05188 | 0.239865 | 0.353076 | 515 | 47  |
| LOC654342 | -0.05187 | 0.239935 | 0.353153 | 515 | 515 |
| OPN5      | -0.05186 | 0.240057 | 0.353262 | 515 | 93  |
| NXF4      | -0.05186 | 0.240079 | 0.353262 | 515 | 42  |
| ARID2     | -0.05185 | 0.240134 | 0.353316 | 515 | 515 |
| OPRM1     | -0.05184 | 0.240262 | 0.353367 | 515 | 114 |
| RAB41     | -0.05181 | 0.240502 | 0.353628 | 515 | 465 |
| OXSM      | -0.05181 | 0.240527 | 0.353634 | 515 | 515 |
| TSPAN6    | -0.0518  | 0.240618 | 0.353741 | 515 | 515 |
| NDUFA4    | -0.05177 | 0.240904 | 0.35411  | 515 | 515 |
| SLC35F4   | -0.05173 | 0.241253 | 0.354571 | 515 | 204 |
| PIK3C2A   | -0.05172 | 0.241378 | 0.354712 | 515 | 515 |
| OR7A5     | -0.05172 | 0.241384 | 0.354712 | 515 | 195 |
| DEPDC4    | -0.05167 | 0.241832 | 0.355344 | 515 | 515 |
| AVEN      | -0.05166 | 0.241876 | 0.355378 | 515 | 515 |
| BHMT      | -0.05165 | 0.241968 | 0.355439 | 515 | 421 |
| C20orf185 | -0.05163 | 0.242169 | 0.355682 | 515 | 7   |
| GHDC      | -0.05162 | 0.242224 | 0.355736 | 515 | 515 |
| KCNK2     | -0.05158 | 0.242631 | 0.35623  | 515 | 452 |
| INHBB     | -0.05156 | 0.242762 | 0.356344 | 515 | 515 |
| TFAP2D    | -0.05156 | 0.242816 | 0.356396 | 515 | 279 |
| BSPRY     | -0.05155 | 0.242906 | 0.356502 | 515 | 515 |
| KATNAL2   | -0.05154 | 0.243025 | 0.356651 | 515 | 515 |
| DNAJC19   | -0.05153 | 0.243059 | 0.356675 | 515 | 515 |
| SPATA6    | -0.05151 | 0.243246 | 0.356871 | 515 | 515 |
| C1orf105  | -0.05148 | 0.243488 | 0.357123 | 515 | 245 |
| SH2D7     | -0.05148 | 0.243536 | 0.357155 | 515 | 351 |
| ATMIN     | -0.05148 | 0.243547 | 0.357155 | 515 | 515 |
| CALML4    | -0.05147 | 0.243607 | 0.357212 | 515 | 515 |
| ZKSCAN1   | -0.05147 | 0.243622 | 0.357212 | 515 | 515 |
| C16orf93  | -0.05143 | 0.243976 | 0.357705 | 515 | 515 |
| MRT04     | -0.05142 | 0.244038 | 0.35777  | 515 | 515 |
| MYOG      | -0.05141 | 0.244197 | 0.357951 | 515 | 78  |
| C10orf12  | -0.0514  | 0.244265 | 0.357991 | 515 | 515 |
| DCPS      | -0.05138 | 0.244445 | 0.358209 | 515 | 515 |
| DAB2IP    | -0.05136 | 0.244596 | 0.358404 | 515 | 515 |
| EFR3B     | -0.05136 | 0.244654 | 0.358436 | 515 | 515 |
| C14orf101 | -0.05135 | 0.244771 | 0.358582 | 515 | 515 |
| LOC643719 | -0.05133 | 0.244927 | 0.358757 | 515 | 494 |
| EEF1A2    | -0.05127 | 0.245419 | 0.359425 | 515 | 512 |
| KCNJ3     | -0.05127 | 0.245485 | 0.359469 | 515 | 232 |
| CADPS2    | -0.05126 | 0.245521 | 0.359495 | 515 | 515 |
| C17orf93  | -0.05124 | 0.2457   | 0.359704 | 515 | 223 |
| LOC100130 | -0.05122 | 0.245914 | 0.359992 | 515 | 510 |
| KIAA0368  | -0.0512  | 0.246108 | 0.360222 | 515 | 515 |
| C17orf75  | -0.0512  | 0.246125 | 0.360222 | 515 | 515 |
| DCAKD     | -0.05117 | 0.246343 | 0.360514 | 515 | 515 |
| C10orf108 | -0.05115 | 0.246552 | 0.360768 | 515 | 500 |
| ATP2A1    | -0.05113 | 0.246743 | 0.360994 | 515 | 513 |
| HBQ1      | -0.05112 | 0.246819 | 0.361078 | 515 | 241 |
| CELF4     | -0.05112 | 0.246887 | 0.361125 | 515 | 513 |
| ISG20L2   | -0.0511  | 0.247019 | 0.361281 | 515 | 515 |
| ERF       | -0.05108 | 0.247215 | 0.361446 | 515 | 515 |
| SLC16A5   | -0.05107 | 0.247327 | 0.361557 | 515 | 515 |

|           |          |          |          |     |     |
|-----------|----------|----------|----------|-----|-----|
| UCMA      | -0.05103 | 0.247672 | 0.361982 | 515 | 33  |
| MAGEB10   | -0.05102 | 0.247753 | 0.362073 | 515 | 24  |
| ABHD1     | -0.05099 | 0.248081 | 0.362447 | 515 | 506 |
| HIST1H4L  | -0.05095 | 0.248439 | 0.362846 | 515 | 81  |
| HSCB      | -0.05094 | 0.248486 | 0.362853 | 515 | 515 |
| OR6W1P    | -0.05094 | 0.248528 | 0.362882 | 515 | 29  |
| CSPG4PY2  | -0.05094 | 0.248556 | 0.362882 | 515 | 10  |
| HIST2H2AE | -0.05094 | 0.248564 | 0.362882 | 515 | 289 |
| GDAP2     | -0.05093 | 0.248633 | 0.362909 | 515 | 515 |
| PDZK1     | -0.05093 | 0.248657 | 0.362917 | 515 | 512 |
| RPS6KB2   | -0.05091 | 0.248759 | 0.36304  | 515 | 515 |
| CRISP1    | -0.0509  | 0.248915 | 0.363171 | 515 | 9   |
| CRAMP1L   | -0.05089 | 0.249017 | 0.363267 | 515 | 515 |
| RIMKLB    | -0.05089 | 0.24903  | 0.363267 | 515 | 515 |
| FAM188B   | -0.05085 | 0.249362 | 0.363654 | 515 | 515 |
| RIMBP2    | -0.05082 | 0.249625 | 0.363985 | 515 | 468 |
| MYEOV2    | -0.05081 | 0.249741 | 0.364127 | 515 | 515 |
| ZNF697    | -0.0508  | 0.249827 | 0.364226 | 515 | 515 |
| GH2       | -0.05079 | 0.249906 | 0.364314 | 515 | 108 |
| C14orf19  | -0.05079 | 0.249949 | 0.364334 | 515 | 506 |
| SEMG2     | -0.05079 | 0.249955 | 0.364334 | 515 | 29  |
| OR51I1    | -0.05077 | 0.25012  | 0.364533 | 515 | 82  |
| SLC25A37  | -0.05077 | 0.250129 | 0.364533 | 515 | 515 |
| OR5H1     | -0.05076 | 0.25016  | 0.364552 | 515 | 4   |
| ZNF320    | -0.05075 | 0.250278 | 0.364697 | 515 | 515 |
| CHAF1B    | -0.05075 | 0.250324 | 0.364712 | 515 | 515 |
| BAZ1B     | -0.05067 | 0.251042 | 0.365529 | 515 | 515 |
| USP48     | -0.05067 | 0.251057 | 0.365529 | 515 | 515 |
| HOXB13    | -0.05066 | 0.25116  | 0.365606 | 515 | 333 |
| OR11H6    | -0.05066 | 0.25117  | 0.365606 | 515 | 48  |
| PLEKHG4B  | -0.05066 | 0.251176 | 0.365606 | 515 | 514 |
| SLC35A3   | -0.05065 | 0.251197 | 0.36561  | 515 | 515 |
| BRDT      | -0.05063 | 0.251437 | 0.365879 | 515 | 349 |
| HMGB4     | -0.0506  | 0.251685 | 0.366187 | 515 | 54  |
| GAL3ST3   | -0.05059 | 0.251758 | 0.36624  | 515 | 229 |
| ZCCHC8    | -0.05059 | 0.251806 | 0.366257 | 515 | 515 |
| DDX31     | -0.05058 | 0.251898 | 0.366337 | 515 | 515 |
| IPO13     | -0.05055 | 0.252123 | 0.366611 | 515 | 515 |
| GJD2      | -0.05055 | 0.252174 | 0.366632 | 515 | 23  |
| LRP3      | -0.05054 | 0.252293 | 0.366779 | 515 | 515 |
| KHDRBS3   | -0.05053 | 0.252365 | 0.366834 | 515 | 515 |
| FGF19     | -0.05052 | 0.252402 | 0.366856 | 515 | 336 |
| C13orf35  | -0.05052 | 0.252468 | 0.366875 | 515 | 273 |
| LOC100130 | -0.05052 | 0.25247  | 0.366875 | 515 | 515 |
| TSPAN8    | -0.05051 | 0.252581 | 0.366983 | 515 | 513 |
| PDZD2     | -0.05046 | 0.252966 | 0.36741  | 515 | 515 |
| NKAIN3    | -0.05042 | 0.253367 | 0.367939 | 515 | 152 |
| SLC26A11  | -0.05042 | 0.253413 | 0.367978 | 515 | 515 |
| NBPF3     | -0.05041 | 0.253444 | 0.367996 | 515 | 515 |
| LRIT1     | -0.05038 | 0.253719 | 0.368369 | 515 | 73  |
| C14orf169 | -0.05038 | 0.253777 | 0.368426 | 515 | 515 |
| C1orf14   | -0.05038 | 0.253795 | 0.368426 | 515 | 54  |
| C6orf94   | -0.05037 | 0.253854 | 0.368485 | 515 | 127 |
| VCY       | -0.05037 | 0.25388  | 0.368496 | 515 | 24  |



|          |          |          |          |     |     |
|----------|----------|----------|----------|-----|-----|
| SPDYE2   | -0.05036 | 0.253997 | 0.368612 | 515 | 374 |
| KIF6     | -0.05031 | 0.254391 | 0.36913  | 515 | 509 |
| SEPN1    | -0.0503  | 0.254492 | 0.369223 | 515 | 515 |
| GFM1     | -0.05026 | 0.254916 | 0.369692 | 515 | 515 |
| VWCE     | -0.05026 | 0.254926 | 0.369692 | 515 | 514 |
| ANO4     | -0.05022 | 0.255314 | 0.370201 | 515 | 472 |
| KCNT1    | -0.05021 | 0.255339 | 0.370211 | 515 | 439 |
| POTED    | -0.05021 | 0.255406 | 0.37028  | 515 | 6   |
| CLNS1A   | -0.05018 | 0.255692 | 0.37064  | 515 | 515 |
| GCC1     | -0.05017 | 0.25571  | 0.37064  | 515 | 515 |
| INTS8    | -0.05014 | 0.255994 | 0.370998 | 515 | 515 |
| C15orf32 | -0.05011 | 0.256312 | 0.371433 | 515 | 33  |
| FAM136B  | -0.05008 | 0.256567 | 0.371775 | 515 | 214 |
| FAM27B   | -0.05006 | 0.256771 | 0.372041 | 515 | 57  |
| DDX53    | -0.05006 | 0.256806 | 0.372041 | 515 | 139 |
| TCEB3C   | -0.04999 | 0.2575   | 0.372749 | 515 | 89  |
| TOM1L2   | -0.04997 | 0.257631 | 0.372911 | 515 | 515 |
| PMP2     | -0.04995 | 0.257819 | 0.373156 | 515 | 189 |
| VCX3B    | -0.04995 | 0.257861 | 0.373184 | 515 | 158 |
| AGXT2    | -0.04994 | 0.257983 | 0.373312 | 515 | 98  |
| OSTCL    | -0.04993 | 0.258071 | 0.373412 | 515 | 514 |
| UMPS     | -0.04991 | 0.258241 | 0.373551 | 515 | 515 |
| ZNF217   | -0.04988 | 0.258486 | 0.373769 | 515 | 515 |
| NLRP13   | -0.04987 | 0.258647 | 0.373975 | 515 | 50  |
| CTSF     | -0.04986 | 0.258747 | 0.374081 | 515 | 515 |
| CCDC25   | -0.04985 | 0.258757 | 0.374081 | 515 | 515 |
| C6orf147 | -0.04982 | 0.259044 | 0.374441 | 515 | 515 |
| PPP3CA   | -0.04976 | 0.259642 | 0.375252 | 515 | 515 |
| LUC7L    | -0.04975 | 0.259779 | 0.375377 | 515 | 515 |
| ATP5G3   | -0.04975 | 0.259786 | 0.375377 | 515 | 515 |
| SLC6A9   | -0.04974 | 0.259862 | 0.375406 | 515 | 515 |
| TMED1    | -0.04973 | 0.259951 | 0.375508 | 515 | 515 |
| RBM19    | -0.04973 | 0.259981 | 0.375523 | 515 | 515 |
| HARS     | -0.0497  | 0.260196 | 0.375808 | 515 | 515 |
| MNX1     | -0.04968 | 0.260463 | 0.376138 | 515 | 502 |
| PIGH     | -0.04965 | 0.260692 | 0.376441 | 515 | 515 |
| TMC5     | -0.04964 | 0.260821 | 0.376602 | 515 | 515 |
| PTPRN    | -0.04963 | 0.260895 | 0.376654 | 515 | 470 |
| SLC24A2  | -0.04962 | 0.261046 | 0.376818 | 515 | 364 |
| IDUA     | -0.0496  | 0.261232 | 0.377031 | 515 | 515 |
| CREBBP   | -0.04958 | 0.261363 | 0.377166 | 515 | 515 |
| RPL13AP3 | -0.04958 | 0.261435 | 0.377205 | 515 | 514 |
| IFNA8    | -0.04957 | 0.261447 | 0.377205 | 515 | 15  |
| C17orf58 | -0.04956 | 0.261608 | 0.377356 | 515 | 515 |
| PAFAH1B1 | -0.04955 | 0.261696 | 0.377455 | 515 | 515 |
| POLR3K   | -0.04955 | 0.261722 | 0.377455 | 515 | 515 |
| MSH6     | -0.04954 | 0.261733 | 0.377455 | 515 | 515 |
| ATF1     | -0.04954 | 0.261762 | 0.377469 | 515 | 515 |
| PLD2     | -0.04953 | 0.261906 | 0.377623 | 515 | 515 |
| MAGEA8   | -0.04951 | 0.262036 | 0.377756 | 515 | 291 |
| CCNL2    | -0.04951 | 0.26208  | 0.377791 | 515 | 515 |
| PKN3     | -0.04947 | 0.262449 | 0.378242 | 515 | 515 |
| CBWD6    | -0.04943 | 0.262806 | 0.378676 | 515 | 515 |
| LASS3    | -0.04943 | 0.262808 | 0.378676 | 515 | 259 |

|           |          |          |          |     |     |
|-----------|----------|----------|----------|-----|-----|
| ASCC2     | -0.04942 | 0.26294  | 0.37884  | 515 | 515 |
| SH2D3A    | -0.04941 | 0.263026 | 0.378937 | 515 | 515 |
| WDR4      | -0.0494  | 0.263088 | 0.378999 | 515 | 515 |
| C2CD2L    | -0.0494  | 0.263136 | 0.379022 | 515 | 515 |
| ZNF280D   | -0.04938 | 0.263296 | 0.379189 | 515 | 515 |
| NSUN6     | -0.04937 | 0.263463 | 0.379401 | 515 | 515 |
| CMIP      | -0.04936 | 0.263509 | 0.37944  | 515 | 515 |
| DIRAS2    | -0.04936 | 0.26356  | 0.379487 | 515 | 456 |
| IL17C     | -0.04931 | 0.26402  | 0.380095 | 515 | 455 |
| TECRL     | -0.04928 | 0.264332 | 0.380462 | 515 | 10  |
| TENC1     | -0.04925 | 0.264548 | 0.380717 | 515 | 515 |
| DNAJC12   | -0.04923 | 0.264746 | 0.380948 | 515 | 514 |
| PEX5L     | -0.04921 | 0.264985 | 0.381244 | 515 | 458 |
| ITPK1     | -0.04921 | 0.264998 | 0.381244 | 515 | 515 |
| WDR83     | -0.0492  | 0.26504  | 0.38126  | 515 | 515 |
| TAF12     | -0.04915 | 0.265508 | 0.381879 | 515 | 515 |
| C2orf82   | -0.04913 | 0.265747 | 0.382167 | 515 | 417 |
| SEC61A1   | -0.04913 | 0.26579  | 0.382202 | 515 | 515 |
| RAD23A    | -0.04911 | 0.265975 | 0.382441 | 515 | 515 |
| BHLHA15   | -0.04909 | 0.266108 | 0.38257  | 515 | 512 |
| ROCK2     | -0.04909 | 0.266188 | 0.382627 | 515 | 515 |
| PAX1      | -0.049   | 0.267057 | 0.383749 | 515 | 199 |
| SNORA75   | -0.04899 | 0.267162 | 0.383858 | 515 | 23  |
| MRPS35    | -0.04898 | 0.267172 | 0.383858 | 515 | 515 |
| SLC34A3   | -0.04897 | 0.267273 | 0.383948 | 515 | 496 |
| C1orf91   | -0.04893 | 0.267747 | 0.384574 | 515 | 515 |
| C15orf28  | -0.0489  | 0.267971 | 0.38484  | 515 | 493 |
| YY1       | -0.04886 | 0.268363 | 0.385292 | 515 | 515 |
| NISCH     | -0.04885 | 0.268454 | 0.385395 | 515 | 515 |
| USP26     | -0.04884 | 0.268557 | 0.385516 | 515 | 144 |
| KCNK16    | -0.04883 | 0.268661 | 0.38561  | 515 | 220 |
| WBP4      | -0.04882 | 0.268802 | 0.385783 | 515 | 515 |
| PAR4      | -0.04876 | 0.269374 | 0.386466 | 515 | 24  |
| CCDC140   | -0.04875 | 0.269503 | 0.386624 | 515 | 31  |
| USP42     | -0.04874 | 0.26953  | 0.386635 | 515 | 515 |
| KRTAP5-9  | -0.04873 | 0.269621 | 0.386737 | 515 | 457 |
| CLDN10    | -0.04871 | 0.269886 | 0.387007 | 515 | 505 |
| MPPED2    | -0.04867 | 0.270304 | 0.387526 | 515 | 511 |
| OR4N3P    | -0.04866 | 0.270364 | 0.387552 | 515 | 15  |
| SLC7A8    | -0.04866 | 0.27039  | 0.387563 | 515 | 515 |
| RRP8      | -0.04861 | 0.270827 | 0.388132 | 515 | 515 |
| NCRNA0023 | -0.0486  | 0.270911 | 0.388225 | 515 | 405 |
| MYO6      | -0.0486  | 0.27098  | 0.388296 | 515 | 515 |
| LOC285548 | -0.04855 | 0.271447 | 0.388855 | 515 | 270 |
| FOXG1     | -0.04854 | 0.271508 | 0.388887 | 515 | 208 |
| CAMK2B    | -0.04853 | 0.271605 | 0.388998 | 515 | 503 |
| TRIAP1    | -0.04853 | 0.271681 | 0.38905  | 515 | 515 |
| PRR24     | -0.04853 | 0.271681 | 0.38905  | 515 | 515 |
| PCDHB6    | -0.04852 | 0.271707 | 0.38906  | 515 | 515 |
| ENAM      | -0.04852 | 0.271736 | 0.389073 | 515 | 470 |
| CYP4A22   | -0.04849 | 0.272006 | 0.389375 | 515 | 186 |
| ABCC4     | -0.04848 | 0.272099 | 0.389481 | 515 | 515 |
| GFRA4     | -0.04842 | 0.272716 | 0.390228 | 515 | 46  |
| HNRNPA3   | -0.04842 | 0.272719 | 0.390228 | 515 | 515 |

|           |          |          |          |     |     |
|-----------|----------|----------|----------|-----|-----|
| UGT2B15   | -0.04839 | 0.273023 | 0.390609 | 515 | 461 |
| PER4      | -0.04837 | 0.27322  | 0.390862 | 515 | 12  |
| RPA1      | -0.04835 | 0.273449 | 0.391133 | 515 | 515 |
| FAM113A   | -0.04835 | 0.27347  | 0.391135 | 515 | 515 |
| PIGZ      | -0.04833 | 0.273592 | 0.391245 | 515 | 515 |
| PDGFA     | -0.04831 | 0.273826 | 0.391393 | 515 | 515 |
| PATE1     | -0.0483  | 0.273893 | 0.391433 | 515 | 14  |
| WWC3      | -0.04827 | 0.274201 | 0.391733 | 515 | 515 |
| PRR23C    | -0.04827 | 0.274201 | 0.391733 | 515 | 7   |
| TBC1D26   | -0.04827 | 0.274253 | 0.391779 | 515 | 251 |
| SMAD4     | -0.04826 | 0.274312 | 0.391836 | 515 | 515 |
| APOA2     | -0.04819 | 0.275036 | 0.392698 | 515 | 157 |
| C15orf42  | -0.04819 | 0.275053 | 0.392698 | 515 | 515 |
| LOC285194 | -0.04818 | 0.27511  | 0.39275  | 515 | 12  |
| NDUFB1    | -0.04817 | 0.275177 | 0.392819 | 515 | 515 |
| ZAN       | -0.04817 | 0.27526  | 0.392909 | 515 | 98  |
| COPS7B    | -0.04813 | 0.275628 | 0.393293 | 515 | 515 |
| PHLDB3    | -0.04812 | 0.275747 | 0.393408 | 515 | 515 |
| CCT2      | -0.04811 | 0.275814 | 0.393446 | 515 | 515 |
| TSPY3     | -0.0481  | 0.275922 | 0.393521 | 515 | 15  |
| B3GNT1    | -0.0481  | 0.275926 | 0.393521 | 515 | 515 |
| FAM129B   | -0.04806 | 0.276317 | 0.394024 | 515 | 515 |
| MS4A6E    | -0.04805 | 0.2764   | 0.394085 | 515 | 224 |
| PHKA2     | -0.04805 | 0.276426 | 0.394095 | 515 | 515 |
| DHRS2     | -0.04805 | 0.276451 | 0.394102 | 515 | 508 |
| KRT13     | -0.048   | 0.276873 | 0.394619 | 515 | 483 |
| CSNK2A1P  | -0.048   | 0.27696  | 0.394687 | 515 | 515 |
| HEATR5A   | -0.04798 | 0.277126 | 0.394867 | 515 | 515 |
| MYLK3     | -0.04797 | 0.277201 | 0.394917 | 515 | 514 |
| FANCI     | -0.04796 | 0.277304 | 0.395036 | 515 | 515 |
| SEPT7L    | -0.04793 | 0.277634 | 0.395478 | 515 | 362 |
| OXAL1L    | -0.04792 | 0.277741 | 0.395602 | 515 | 515 |
| FLJ43860  | -0.04791 | 0.277806 | 0.395662 | 515 | 178 |
| CCKAR     | -0.04788 | 0.278142 | 0.396004 | 515 | 129 |
| SERPINF2  | -0.04787 | 0.27823  | 0.396101 | 515 | 515 |
| C6orf218  | -0.04779 | 0.279046 | 0.397122 | 515 | 250 |
| H2AFV     | -0.04778 | 0.279132 | 0.397216 | 515 | 515 |
| F8A1      | -0.04774 | 0.279512 | 0.397671 | 515 | 515 |
| BCL9L     | -0.04773 | 0.279618 | 0.397737 | 515 | 515 |
| COX6B1    | -0.04772 | 0.279695 | 0.397791 | 515 | 515 |
| CLCNKB    | -0.04771 | 0.279804 | 0.397917 | 515 | 503 |
| GJB1      | -0.04769 | 0.279998 | 0.398136 | 515 | 507 |
| JMJD7-PLA | -0.04765 | 0.280413 | 0.398698 | 515 | 515 |
| PBK       | -0.04765 | 0.280443 | 0.398713 | 515 | 515 |
| C5orf13   | -0.04763 | 0.280594 | 0.398896 | 515 | 515 |
| EIF4H     | -0.04761 | 0.280854 | 0.399154 | 515 | 515 |
| TTY10     | -0.04757 | 0.281233 | 0.399614 | 515 | 122 |
| NYNRIN    | -0.04757 | 0.281277 | 0.399614 | 515 | 515 |
| FOLR1     | -0.04756 | 0.28138  | 0.399732 | 515 | 514 |
| MPP5      | -0.04755 | 0.281491 | 0.399839 | 515 | 515 |
| HN1       | -0.04755 | 0.281495 | 0.399839 | 515 | 515 |
| FZD10     | -0.04753 | 0.281602 | 0.399961 | 515 | 512 |
| RPS17     | -0.04751 | 0.281815 | 0.400207 | 515 | 515 |
| KIAA1210  | -0.04747 | 0.282238 | 0.400694 | 515 | 382 |

|           |          |          |          |     |     |
|-----------|----------|----------|----------|-----|-----|
| POTEB     | -0.04746 | 0.282367 | 0.40082  | 515 | 11  |
| ATPBD4    | -0.04745 | 0.282439 | 0.400836 | 515 | 515 |
| RAC1      | -0.04742 | 0.282787 | 0.401245 | 515 | 515 |
| CDC123    | -0.04741 | 0.282893 | 0.401339 | 515 | 515 |
| PRAMEF14  | -0.04741 | 0.282915 | 0.401342 | 515 | 19  |
| C11orf95  | -0.04739 | 0.283098 | 0.401549 | 515 | 515 |
| HMX1      | -0.04738 | 0.283169 | 0.401617 | 515 | 75  |
| SULT1A2   | -0.04738 | 0.283198 | 0.401629 | 515 | 515 |
| PPP2R3B   | -0.04737 | 0.283322 | 0.401748 | 515 | 515 |
| ERH       | -0.04735 | 0.283439 | 0.401885 | 515 | 515 |
| LYPLA1    | -0.04735 | 0.283525 | 0.401979 | 515 | 515 |
| COPB1     | -0.04733 | 0.283722 | 0.402173 | 515 | 515 |
| LOC400940 | -0.0473  | 0.283941 | 0.402454 | 515 | 238 |
| SCG2      | -0.04729 | 0.28407  | 0.402609 | 515 | 515 |
| NUP210L   | -0.04726 | 0.284404 | 0.403054 | 515 | 481 |
| PRDM11    | -0.04725 | 0.284512 | 0.403178 | 515 | 514 |
| ASCC1     | -0.04724 | 0.284594 | 0.403266 | 515 | 515 |
| F12       | -0.04723 | 0.284661 | 0.403303 | 515 | 515 |
| HPVC1     | -0.04719 | 0.285104 | 0.403759 | 515 | 5   |
| EPAS1     | -0.04718 | 0.285218 | 0.403892 | 515 | 515 |
| MCM4      | -0.04717 | 0.285327 | 0.404018 | 515 | 515 |
| AHCYL2    | -0.04715 | 0.285548 | 0.404251 | 515 | 515 |
| PASD1     | -0.04714 | 0.285575 | 0.404251 | 515 | 94  |
| AMAC1L2   | -0.04714 | 0.285592 | 0.404251 | 515 | 421 |
| AN09      | -0.04714 | 0.285627 | 0.40427  | 515 | 515 |
| LOC100134 | -0.0471  | 0.285996 | 0.404736 | 515 | 515 |
| GSTM3     | -0.0471  | 0.286076 | 0.404821 | 515 | 515 |
| LOC644145 | -0.04709 | 0.286106 | 0.404834 | 515 | 14  |
| KTN1      | -0.04703 | 0.286705 | 0.405652 | 515 | 515 |
| MON1B     | -0.04703 | 0.286725 | 0.405652 | 515 | 515 |
| CSTF2     | -0.04703 | 0.286766 | 0.405682 | 515 | 515 |
| C17orf53  | -0.04702 | 0.286807 | 0.405712 | 515 | 515 |
| FOXP1     | -0.04701 | 0.286993 | 0.405941 | 515 | 515 |
| IDI1      | -0.047   | 0.28701  | 0.405941 | 515 | 515 |
| LMO1      | -0.04698 | 0.287219 | 0.406179 | 515 | 353 |
| GMNN      | -0.04697 | 0.287322 | 0.406296 | 515 | 515 |
| SH3GL1    | -0.04697 | 0.287361 | 0.406322 | 515 | 515 |
| GALK1     | -0.04696 | 0.287508 | 0.406502 | 515 | 515 |
| BTBD3     | -0.04694 | 0.287624 | 0.406608 | 515 | 515 |
| NOP16     | -0.04694 | 0.287674 | 0.406634 | 515 | 515 |
| FAM155B   | -0.04694 | 0.287711 | 0.406639 | 515 | 508 |
| WDTC1     | -0.04693 | 0.287727 | 0.406639 | 515 | 515 |
| OR2W5     | -0.04693 | 0.287821 | 0.406727 | 515 | 15  |
| OR8G5     | -0.04692 | 0.28783  | 0.406727 | 515 | 35  |
| TDRD10    | -0.04691 | 0.288004 | 0.406927 | 515 | 515 |
| LHX3      | -0.04691 | 0.288013 | 0.406927 | 515 | 148 |
| KRTAP9-9  | -0.0469  | 0.288093 | 0.40696  | 515 | 5   |
| C18orf26  | -0.0469  | 0.288097 | 0.40696  | 515 | 111 |
| ZNF397    | -0.0469  | 0.288121 | 0.406966 | 515 | 515 |
| MTERFD2   | -0.04688 | 0.288337 | 0.407212 | 515 | 515 |
| TDRD1     | -0.04685 | 0.288584 | 0.407533 | 515 | 445 |
| PCDH8     | -0.04684 | 0.288657 | 0.407604 | 515 | 253 |
| PGC       | -0.04683 | 0.288759 | 0.407639 | 515 | 509 |
| FBX036    | -0.04682 | 0.288933 | 0.407795 | 515 | 515 |

|          |          |          |          |     |     |
|----------|----------|----------|----------|-----|-----|
| KIF3A    | -0.04682 | 0.288933 | 0.407795 | 515 | 515 |
| OR11H12  | -0.04681 | 0.289048 | 0.407899 | 515 | 32  |
| PSG8     | -0.0468  | 0.289138 | 0.407954 | 515 | 69  |
| C19orf24 | -0.04679 | 0.289183 | 0.407975 | 515 | 515 |
| OSBPL1A  | -0.04677 | 0.289429 | 0.40829  | 515 | 515 |
| STX5     | -0.04676 | 0.289572 | 0.408437 | 515 | 515 |
| LRSAM1   | -0.04673 | 0.28985  | 0.408743 | 515 | 515 |
| KLK15    | -0.04668 | 0.290334 | 0.409338 | 515 | 99  |
| LPPR1    | -0.04665 | 0.290679 | 0.409709 | 515 | 498 |
| C3orf47  | -0.04664 | 0.290725 | 0.409746 | 515 | 515 |
| FAM90A7  | -0.04664 | 0.290782 | 0.409785 | 515 | 121 |
| UGT2A1   | -0.04664 | 0.290805 | 0.409785 | 515 | 255 |
| SLC22A25 | -0.04663 | 0.290839 | 0.409791 | 515 | 86  |
| VAMP2    | -0.04659 | 0.2913   | 0.410382 | 515 | 515 |
| LLGL1    | -0.04658 | 0.291443 | 0.410497 | 515 | 515 |
| LQK1     | -0.04657 | 0.291517 | 0.41053  | 515 | 515 |
| FAM86B2  | -0.04657 | 0.291528 | 0.41053  | 515 | 457 |
| ZFATAS   | -0.04654 | 0.291765 | 0.410805 | 515 | 132 |
| KRT19    | -0.04652 | 0.29202  | 0.411049 | 515 | 515 |
| YME1L1   | -0.04651 | 0.292077 | 0.411071 | 515 | 515 |
| FAM47C   | -0.0465  | 0.292264 | 0.411288 | 515 | 153 |
| PIGN     | -0.04649 | 0.292337 | 0.411329 | 515 | 515 |
| SH3RF1   | -0.04649 | 0.292342 | 0.411329 | 515 | 515 |
| STT3B    | -0.04644 | 0.292814 | 0.411847 | 515 | 515 |
| DDA1     | -0.04642 | 0.293052 | 0.41211  | 515 | 515 |
| SLC25A16 | -0.04642 | 0.293063 | 0.41211  | 515 | 515 |
| HNRNPC   | -0.04641 | 0.293173 | 0.412207 | 515 | 515 |
| RC3H1    | -0.04634 | 0.293879 | 0.413055 | 515 | 515 |
| TRIM46   | -0.04633 | 0.293968 | 0.413151 | 515 | 515 |
| DGCR9    | -0.04633 | 0.294004 | 0.413173 | 515 | 512 |
| LPPR2    | -0.04632 | 0.294077 | 0.413221 | 515 | 515 |
| EEF2K    | -0.04631 | 0.294198 | 0.413358 | 515 | 515 |
| ACVR2A   | -0.0463  | 0.294328 | 0.413511 | 515 | 515 |
| DYNC1I2  | -0.04629 | 0.294375 | 0.413519 | 515 | 515 |
| RPAP3    | -0.04626 | 0.294681 | 0.413891 | 515 | 515 |
| FGF9     | -0.04625 | 0.294794 | 0.414021 | 515 | 508 |
| PAQR4    | -0.04624 | 0.294888 | 0.414095 | 515 | 515 |
| SPEN     | -0.04621 | 0.295196 | 0.414469 | 515 | 515 |
| SDHAF2   | -0.04619 | 0.295454 | 0.414714 | 515 | 515 |
| ZNF644   | -0.04618 | 0.295523 | 0.414782 | 515 | 515 |
| AUH      | -0.04618 | 0.295589 | 0.414846 | 515 | 515 |
| NEURL    | -0.04616 | 0.295778 | 0.415082 | 515 | 512 |
| HSP90AA1 | -0.04609 | 0.296503 | 0.415924 | 515 | 515 |
| TMEM207  | -0.04608 | 0.296647 | 0.416038 | 515 | 85  |
| SNORA79  | -0.04607 | 0.296716 | 0.416049 | 515 | 5   |
| CETN1    | -0.04606 | 0.296808 | 0.416147 | 515 | 5   |
| SNHG6    | -0.04604 | 0.297048 | 0.416426 | 515 | 515 |
| CDK5RAP3 | -0.04603 | 0.297123 | 0.416501 | 515 | 515 |
| EIF4A3   | -0.04599 | 0.297554 | 0.417055 | 515 | 515 |
| PCID2    | -0.04598 | 0.297653 | 0.417141 | 515 | 515 |
| ENTPD4   | -0.04598 | 0.297667 | 0.417141 | 515 | 515 |
| FOLH1B   | -0.04597 | 0.297777 | 0.417242 | 515 | 242 |
| FAM167A  | -0.04596 | 0.297866 | 0.417279 | 515 | 515 |
| HOXB1    | -0.04596 | 0.297904 | 0.417303 | 515 | 108 |

|           |          |          |          |     |     |
|-----------|----------|----------|----------|-----|-----|
| VSTM2A    | -0.04595 | 0.297952 | 0.417336 | 515 | 99  |
| TRIM68    | -0.04595 | 0.297969 | 0.417336 | 515 | 515 |
| MECOM     | -0.04594 | 0.298046 | 0.417385 | 515 | 515 |
| FAM160A1  | -0.04594 | 0.298046 | 0.417385 | 515 | 515 |
| NOSTRIN   | -0.04593 | 0.298192 | 0.417561 | 515 | 515 |
| USH1C     | -0.04593 | 0.298229 | 0.417579 | 515 | 442 |
| KRT78     | -0.04592 | 0.298262 | 0.417579 | 515 | 399 |
| P4HA1     | -0.04592 | 0.298272 | 0.417579 | 515 | 515 |
| DAGLB     | -0.04592 | 0.298289 | 0.417579 | 515 | 515 |
| C14orf70  | -0.04588 | 0.298727 | 0.418105 | 515 | 30  |
| SSX1      | -0.04584 | 0.299135 | 0.418618 | 515 | 119 |
| ORC2L     | -0.04582 | 0.299347 | 0.418885 | 515 | 515 |
| EXOC7     | -0.04579 | 0.299611 | 0.419196 | 515 | 515 |
| CRIPT     | -0.04579 | 0.299657 | 0.419202 | 515 | 515 |
| SMYD2     | -0.04579 | 0.299713 | 0.41925  | 515 | 515 |
| RPL31     | -0.04577 | 0.299894 | 0.419364 | 515 | 515 |
| ZNF37A    | -0.04576 | 0.29997  | 0.419405 | 515 | 515 |
| B4GALT1   | -0.04576 | 0.299971 | 0.419405 | 515 | 515 |
| BLOC1S3   | -0.04575 | 0.300088 | 0.419538 | 515 | 515 |
| ZNF99     | -0.04574 | 0.300219 | 0.419664 | 515 | 140 |
| SNORA26   | -0.04572 | 0.300349 | 0.419817 | 515 | 20  |
| SETD2     | -0.0457  | 0.300654 | 0.420176 | 515 | 515 |
| ADAM32    | -0.04569 | 0.300756 | 0.420259 | 515 | 487 |
| AXIN2     | -0.04568 | 0.300803 | 0.420259 | 515 | 515 |
| EXOC8     | -0.04568 | 0.300812 | 0.420259 | 515 | 515 |
| RORB      | -0.04568 | 0.300813 | 0.420259 | 515 | 492 |
| RPS4Y2    | -0.04567 | 0.300952 | 0.420424 | 515 | 72  |
| ZNF669    | -0.04563 | 0.301357 | 0.420901 | 515 | 515 |
| C9orf64   | -0.04561 | 0.301615 | 0.421203 | 515 | 515 |
| GNE       | -0.0456  | 0.301685 | 0.421213 | 515 | 515 |
| NME1      | -0.04558 | 0.301834 | 0.421342 | 515 | 515 |
| PDGFRL    | -0.04558 | 0.301851 | 0.421342 | 515 | 515 |
| STAT3     | -0.04558 | 0.301883 | 0.421342 | 515 | 515 |
| UQCRQ     | -0.04557 | 0.301942 | 0.421394 | 515 | 515 |
| NKAIN2    | -0.04557 | 0.301974 | 0.42141  | 515 | 443 |
| NCRNA0005 | -0.04557 | 0.30202  | 0.421416 | 515 | 50  |
| NOL9      | -0.04554 | 0.302314 | 0.421708 | 515 | 515 |
| RAG1      | -0.04553 | 0.302372 | 0.42176  | 515 | 515 |
| RAB9BP1   | -0.04553 | 0.30243  | 0.421811 | 515 | 6   |
| LOC100133 | -0.04552 | 0.302511 | 0.421894 | 515 | 510 |
| HRH3      | -0.04551 | 0.302664 | 0.422049 | 515 | 130 |
| GRIA4     | -0.04547 | 0.303086 | 0.422549 | 515 | 441 |
| TNFRSF10C | -0.04544 | 0.303373 | 0.42292  | 515 | 515 |
| RNF148    | -0.04543 | 0.303475 | 0.422978 | 515 | 506 |
| SLC26A5   | -0.04543 | 0.303479 | 0.422978 | 515 | 447 |
| HNF1B     | -0.04541 | 0.303686 | 0.42315  | 515 | 514 |
| CCDC38    | -0.0454  | 0.303848 | 0.423316 | 515 | 81  |
| ZNF285    | -0.04539 | 0.30395  | 0.423399 | 515 | 515 |
| C15orf62  | -0.04535 | 0.304357 | 0.423831 | 515 | 515 |
| CARS2     | -0.04535 | 0.304385 | 0.423831 | 515 | 515 |
| C19orf33  | -0.04534 | 0.304429 | 0.423853 | 515 | 513 |
| NOMO3     | -0.04534 | 0.304445 | 0.423853 | 515 | 515 |
| DDX6      | -0.04532 | 0.30465  | 0.424108 | 515 | 515 |
| IFNA10    | -0.04531 | 0.304747 | 0.424184 | 515 | 4   |

|           |          |          |          |     |     |
|-----------|----------|----------|----------|-----|-----|
| C8orf39   | -0.04521 | 0.305806 | 0.425481 | 515 | 513 |
| TMEM72    | -0.04519 | 0.30608  | 0.425786 | 515 | 279 |
| ANKMY2    | -0.04518 | 0.306129 | 0.425811 | 515 | 515 |
| LLEP1     | -0.04516 | 0.306393 | 0.426149 | 515 | 8   |
| CES8      | -0.04514 | 0.30658  | 0.426319 | 515 | 515 |
| NSUN5     | -0.04514 | 0.306583 | 0.426319 | 515 | 515 |
| PPPDE2    | -0.04512 | 0.306819 | 0.426563 | 515 | 515 |
| RPL19     | -0.0451  | 0.306985 | 0.42674  | 515 | 515 |
| INTS10    | -0.0451  | 0.306989 | 0.42674  | 515 | 515 |
| CKS1B     | -0.04507 | 0.307331 | 0.427089 | 515 | 515 |
| MOSC2     | -0.04507 | 0.307332 | 0.427089 | 515 | 515 |
| MS4A10    | -0.04507 | 0.307347 | 0.427089 | 515 | 137 |
| KCNH2     | -0.04505 | 0.307549 | 0.427281 | 515 | 514 |
| CCDC151   | -0.04498 | 0.308307 | 0.428274 | 515 | 514 |
| MLLT1     | -0.04498 | 0.308351 | 0.428306 | 515 | 515 |
| FLOT2     | -0.04497 | 0.308413 | 0.428322 | 515 | 515 |
| TPP2      | -0.04497 | 0.308428 | 0.428322 | 515 | 515 |
| ZNF445    | -0.04494 | 0.308679 | 0.428466 | 515 | 515 |
| TGIF2LY   | -0.04494 | 0.308681 | 0.428466 | 515 | 46  |
| LOC92249  | -0.04492 | 0.308904 | 0.42862  | 515 | 515 |
| LOC440173 | -0.04492 | 0.30892  | 0.42862  | 515 | 461 |
| ZNF560    | -0.04484 | 0.309793 | 0.429663 | 515 | 227 |
| C12orf23  | -0.04484 | 0.309801 | 0.429663 | 515 | 515 |
| MYLIP     | -0.04484 | 0.30984  | 0.429687 | 515 | 515 |
| MAP2      | -0.04482 | 0.309988 | 0.429863 | 515 | 515 |
| C6orf64   | -0.04482 | 0.310068 | 0.429915 | 515 | 515 |
| TBC1D19   | -0.0448  | 0.31026  | 0.430059 | 515 | 515 |
| CCDC155   | -0.04479 | 0.310302 | 0.430059 | 515 | 363 |
| LOC150197 | -0.04479 | 0.310364 | 0.430116 | 515 | 503 |
| OR2T2     | -0.04473 | 0.311042 | 0.430906 | 515 | 9   |
| ALG5      | -0.04471 | 0.311234 | 0.431111 | 515 | 515 |
| MTSS1L    | -0.04468 | 0.311555 | 0.431497 | 515 | 515 |
| ARX       | -0.04467 | 0.311635 | 0.431548 | 515 | 494 |
| TUBB      | -0.04463 | 0.312122 | 0.432101 | 515 | 515 |
| DNAL1     | -0.04463 | 0.312124 | 0.432101 | 515 | 515 |
| NFX1      | -0.04462 | 0.312158 | 0.432101 | 515 | 515 |
| C8orf76   | -0.04461 | 0.31225  | 0.432183 | 515 | 515 |
| FLJ32063  | -0.04461 | 0.312266 | 0.432183 | 515 | 85  |
| PSG3      | -0.0446  | 0.312408 | 0.432319 | 515 | 138 |
| LCA5L     | -0.0446  | 0.312408 | 0.432319 | 515 | 515 |
| WASF3     | -0.04459 | 0.312536 | 0.432465 | 515 | 515 |
| TCTN1     | -0.04458 | 0.312639 | 0.432571 | 515 | 515 |
| KRTAP10-1 | -0.04454 | 0.313011 | 0.433003 | 515 | 13  |
| TYW1B     | -0.04453 | 0.313212 | 0.433251 | 515 | 515 |
| ESRRG     | -0.04452 | 0.313243 | 0.433264 | 515 | 506 |
| C21orf131 | -0.04451 | 0.313338 | 0.433341 | 515 | 13  |
| CTNS      | -0.04451 | 0.313399 | 0.433391 | 515 | 515 |
| ECT2      | -0.0445  | 0.313491 | 0.433405 | 515 | 515 |
| ZFYVE27   | -0.0445  | 0.31351  | 0.433405 | 515 | 515 |
| CCKBR     | -0.0445  | 0.313535 | 0.433405 | 515 | 289 |
| C20orf56  | -0.04444 | 0.314167 | 0.434155 | 515 | 505 |
| ZNF622    | -0.04444 | 0.31417  | 0.434155 | 515 | 515 |
| PELI3     | -0.04442 | 0.314321 | 0.434274 | 515 | 515 |
| TMEM178   | -0.04441 | 0.314479 | 0.434432 | 515 | 515 |

|           |          |          |          |     |     |
|-----------|----------|----------|----------|-----|-----|
| SLC7A9    | -0.04438 | 0.314828 | 0.434855 | 515 | 462 |
| ZNF642    | -0.04438 | 0.314856 | 0.434863 | 515 | 515 |
| DYM       | -0.04436 | 0.31504  | 0.435057 | 515 | 515 |
| SPNS2     | -0.04435 | 0.315107 | 0.435089 | 515 | 515 |
| CEP350    | -0.04432 | 0.315437 | 0.435485 | 515 | 515 |
| POLI      | -0.04432 | 0.31545  | 0.435485 | 515 | 515 |
| GSTZ1     | -0.04432 | 0.315458 | 0.435485 | 515 | 515 |
| KCNC2     | -0.04426 | 0.316097 | 0.436246 | 515 | 233 |
| PTGES     | -0.04425 | 0.316191 | 0.436346 | 515 | 515 |
| ARPP21    | -0.04423 | 0.316394 | 0.436595 | 515 | 185 |
| GOLGA8C   | -0.04419 | 0.316857 | 0.437084 | 515 | 371 |
| LOC100129 | -0.04415 | 0.317334 | 0.437711 | 515 | 515 |
| TIGD7     | -0.04413 | 0.317576 | 0.438014 | 515 | 515 |
| OR10S1    | -0.0441  | 0.317922 | 0.438432 | 515 | 5   |
| ADAM15    | -0.04407 | 0.318188 | 0.438707 | 515 | 515 |
| CCNB1IP1  | -0.04401 | 0.318912 | 0.439585 | 515 | 515 |
| C11orf61  | -0.04398 | 0.319186 | 0.439871 | 515 | 515 |
| TOMM34    | -0.04397 | 0.319278 | 0.439967 | 515 | 515 |
| LFNG      | -0.04393 | 0.319711 | 0.440443 | 515 | 515 |
| LYPLAL1   | -0.04393 | 0.319785 | 0.440514 | 515 | 515 |
| ZNF565    | -0.04392 | 0.319808 | 0.440515 | 515 | 515 |
| FLJ13197  | -0.04391 | 0.319945 | 0.440674 | 515 | 513 |
| ATP5L2    | -0.0439  | 0.320112 | 0.440843 | 515 | 377 |
| HOXD12    | -0.04389 | 0.320182 | 0.440909 | 515 | 85  |
| C1orf93   | -0.04387 | 0.320418 | 0.441105 | 515 | 515 |
| GPR35     | -0.04386 | 0.320497 | 0.44116  | 515 | 515 |
| SPIN3     | -0.04383 | 0.320814 | 0.441506 | 515 | 515 |
| TMPRSS7   | -0.04378 | 0.321365 | 0.442234 | 515 | 434 |
| BAGE      | -0.04378 | 0.321412 | 0.442268 | 515 | 104 |
| ARMCX2    | -0.04376 | 0.321654 | 0.442549 | 515 | 515 |
| ZDHC13    | -0.04376 | 0.32166  | 0.442549 | 515 | 515 |
| CDK5      | -0.04368 | 0.322452 | 0.443455 | 515 | 515 |
| S100A14   | -0.04368 | 0.322521 | 0.443519 | 515 | 515 |
| ZNRD1     | -0.04363 | 0.323063 | 0.444143 | 515 | 515 |
| HSDL2     | -0.04362 | 0.323139 | 0.444216 | 515 | 515 |
| MED18     | -0.04361 | 0.323256 | 0.444346 | 515 | 515 |
| ZNF137    | -0.0436  | 0.323368 | 0.444427 | 515 | 515 |
| MUC17     | -0.0436  | 0.323399 | 0.444427 | 515 | 119 |
| XYLT2     | -0.04359 | 0.32349  | 0.444515 | 515 | 515 |
| TTC13     | -0.04358 | 0.323578 | 0.444539 | 515 | 515 |
| SCARNA22  | -0.04358 | 0.323596 | 0.444539 | 515 | 16  |
| OR1F2P    | -0.04354 | 0.324022 | 0.445032 | 515 | 77  |
| R3HCC1    | -0.04353 | 0.324192 | 0.445235 | 515 | 515 |
| PINX1     | -0.04349 | 0.324602 | 0.445719 | 515 | 515 |
| HPD       | -0.04349 | 0.324611 | 0.445719 | 515 | 471 |
| IQCH      | -0.04346 | 0.324946 | 0.446117 | 515 | 515 |
| ROPN1B    | -0.04344 | 0.325167 | 0.446336 | 515 | 472 |
| ZNF184    | -0.04343 | 0.325329 | 0.44652  | 515 | 515 |
| KIAA0892  | -0.04335 | 0.326134 | 0.447564 | 515 | 515 |
| SPANXB2   | -0.04332 | 0.326479 | 0.447944 | 515 | 100 |
| NKPD1     | -0.04331 | 0.326622 | 0.448091 | 515 | 508 |
| MTP18     | -0.04323 | 0.327474 | 0.449049 | 515 | 515 |
| LOC732275 | -0.04323 | 0.327479 | 0.449049 | 515 | 20  |
| ZNF503    | -0.04321 | 0.327798 | 0.449385 | 515 | 515 |



|          |          |          |          |     |     |
|----------|----------|----------|----------|-----|-----|
| C22orf39 | -0.04317 | 0.328236 | 0.449799 | 515 | 515 |
| UCKL1AS  | -0.04316 | 0.328263 | 0.449807 | 515 | 513 |
| PPP4C    | -0.04314 | 0.328546 | 0.450163 | 515 | 515 |
| NRARP    | -0.04313 | 0.328674 | 0.450307 | 515 | 515 |
| ARID4B   | -0.04312 | 0.328733 | 0.450346 | 515 | 515 |
| NLK      | -0.04309 | 0.32905  | 0.450669 | 515 | 515 |
| KRTAP7-1 | -0.04307 | 0.329291 | 0.450967 | 515 | 22  |
| ST6GAL2  | -0.04304 | 0.329633 | 0.451374 | 515 | 510 |
| CAPN7    | -0.04303 | 0.329751 | 0.451505 | 515 | 515 |
| SCNM1    | -0.04301 | 0.329983 | 0.451729 | 515 | 515 |
| PAQR6    | -0.04297 | 0.33039  | 0.452225 | 515 | 515 |
| ARHGEF4  | -0.04297 | 0.330497 | 0.452341 | 515 | 515 |
| PDK2     | -0.04294 | 0.330791 | 0.452619 | 515 | 515 |
| MAPK8    | -0.04293 | 0.330928 | 0.452744 | 515 | 515 |
| SCRT2    | -0.04291 | 0.331098 | 0.452915 | 515 | 65  |
| C11orf93 | -0.0429  | 0.331187 | 0.453002 | 515 | 514 |
| PAGE2B   | -0.04287 | 0.331513 | 0.453327 | 515 | 173 |
| GBA2     | -0.04282 | 0.332152 | 0.454076 | 515 | 515 |
| FOXD4L5  | -0.04281 | 0.332196 | 0.454106 | 515 | 114 |
| RGPD3    | -0.04281 | 0.332253 | 0.454152 | 515 | 515 |
| CD46     | -0.04278 | 0.332613 | 0.454551 | 515 | 515 |
| C5orf42  | -0.04273 | 0.333149 | 0.455221 | 515 | 515 |
| C10orf99 | -0.04273 | 0.333193 | 0.45525  | 515 | 120 |
| TTY6B    | -0.0427  | 0.333536 | 0.455602 | 515 | 6   |
| NOTO     | -0.0427  | 0.333541 | 0.455602 | 515 | 220 |
| KNCN     | -0.04268 | 0.333689 | 0.455679 | 515 | 157 |
| RASGEF1C | -0.04268 | 0.33369  | 0.455679 | 515 | 370 |
| PRDM4    | -0.04268 | 0.333738 | 0.455679 | 515 | 515 |
| ABCG8    | -0.04266 | 0.333941 | 0.455899 | 515 | 138 |
| INTS2    | -0.04264 | 0.334139 | 0.456106 | 515 | 515 |
| STK40    | -0.04262 | 0.334392 | 0.45639  | 515 | 515 |
| SCARB1   | -0.04262 | 0.334436 | 0.456419 | 515 | 515 |
| YTHDF3   | -0.0426  | 0.334625 | 0.456584 | 515 | 515 |
| ACTR6    | -0.04259 | 0.334738 | 0.456706 | 515 | 515 |
| L3MBTL2  | -0.04257 | 0.334979 | 0.456973 | 515 | 515 |
| UBE2NL   | -0.04254 | 0.335342 | 0.457374 | 515 | 493 |
| PRPSAP1  | -0.04251 | 0.335646 | 0.457679 | 515 | 515 |
| LZTR1    | -0.04251 | 0.335657 | 0.457679 | 515 | 515 |
| PCDHB2   | -0.0425  | 0.335721 | 0.457735 | 515 | 515 |
| P2RY2    | -0.04249 | 0.335883 | 0.457925 | 515 | 515 |
| CCBL1    | -0.04248 | 0.33598  | 0.457994 | 515 | 515 |
| SLC16A4  | -0.04246 | 0.336195 | 0.458194 | 515 | 515 |
| KISS1R   | -0.04241 | 0.336787 | 0.458845 | 515 | 491 |
| PNKP     | -0.04241 | 0.336788 | 0.458845 | 515 | 515 |
| ZNF750   | -0.04241 | 0.336814 | 0.45885  | 515 | 515 |
| TKTL1    | -0.0424  | 0.336909 | 0.458948 | 515 | 402 |
| TTY6     | -0.04239 | 0.336972 | 0.459002 | 515 | 8   |
| CCNK     | -0.04236 | 0.337324 | 0.459388 | 515 | 515 |
| CLEC2A   | -0.04233 | 0.337672 | 0.459798 | 515 | 96  |
| LRFN3    | -0.04233 | 0.337737 | 0.459856 | 515 | 515 |
| CACNA1S  | -0.04229 | 0.338122 | 0.460255 | 515 | 242 |
| RRM1     | -0.04228 | 0.338232 | 0.460347 | 515 | 515 |
| COQ3     | -0.04228 | 0.338236 | 0.460347 | 515 | 515 |
| CLCN3    | -0.04227 | 0.338415 | 0.460538 | 515 | 515 |

|           |          |          |          |     |     |
|-----------|----------|----------|----------|-----|-----|
| SRD5A3    | -0.04227 | 0.338422 | 0.460538 | 515 | 515 |
| EGFL8     | -0.04226 | 0.338522 | 0.460642 | 515 | 510 |
| FABP5L3   | -0.04225 | 0.338655 | 0.46076  | 515 | 370 |
| EVI5L     | -0.04221 | 0.339038 | 0.461247 | 515 | 515 |
| FRG1B     | -0.04221 | 0.339059 | 0.461247 | 515 | 515 |
| DKFZp686A | -0.04216 | 0.33963  | 0.461804 | 515 | 75  |
| DPH5      | -0.04214 | 0.33993  | 0.462087 | 515 | 515 |
| DDX50     | -0.04213 | 0.340017 | 0.462173 | 515 | 515 |
| SOS1      | -0.04211 | 0.340202 | 0.462362 | 515 | 515 |
| FUT3      | -0.04211 | 0.34027  | 0.462423 | 515 | 515 |
| GPR32     | -0.04208 | 0.340516 | 0.462695 | 515 | 33  |
| MAGEA5    | -0.04207 | 0.34064  | 0.462831 | 515 | 287 |
| RPLP2     | -0.04206 | 0.340795 | 0.463011 | 515 | 515 |
| LOC100129 | -0.04205 | 0.340932 | 0.463133 | 515 | 57  |
| FKRP      | -0.04203 | 0.341101 | 0.463328 | 515 | 515 |
| GOLGA6L1  | -0.04203 | 0.341121 | 0.463328 | 515 | 183 |
| VIPR1     | -0.04203 | 0.341158 | 0.463346 | 515 | 515 |
| PCDHGA1   | -0.04201 | 0.341347 | 0.463517 | 515 | 505 |
| TAF1      | -0.04201 | 0.341353 | 0.463517 | 515 | 515 |
| C9orf142  | -0.04199 | 0.341559 | 0.463765 | 515 | 515 |
| POU3F4    | -0.04198 | 0.341739 | 0.463975 | 515 | 58  |
| GLRA3     | -0.04198 | 0.34176  | 0.463975 | 515 | 440 |
| UNKL      | -0.04196 | 0.341889 | 0.464118 | 515 | 515 |
| PRM3      | -0.04196 | 0.341973 | 0.464201 | 515 | 8   |
| FN3KRP    | -0.04193 | 0.342244 | 0.464443 | 515 | 515 |
| FAM90A1   | -0.04189 | 0.342718 | 0.464967 | 515 | 514 |
| SNHG3     | -0.04189 | 0.342724 | 0.464967 | 515 | 515 |
| C8orf45   | -0.04188 | 0.342919 | 0.465172 | 515 | 515 |
| NSUN5P1   | -0.04188 | 0.342921 | 0.465172 | 515 | 515 |
| IFT122    | -0.04187 | 0.342969 | 0.465205 | 515 | 515 |
| MYPN      | -0.04186 | 0.343106 | 0.465328 | 515 | 328 |
| NUP188    | -0.04184 | 0.343291 | 0.465547 | 515 | 515 |
| TSPY4     | -0.04184 | 0.343376 | 0.465599 | 515 | 13  |
| LGALS13   | -0.04183 | 0.343426 | 0.465604 | 515 | 18  |
| FGFBP3    | -0.04183 | 0.34349  | 0.46566  | 515 | 515 |
| QSER1     | -0.04181 | 0.34363  | 0.465786 | 515 | 515 |
| COL18A1   | -0.0418  | 0.343757 | 0.465895 | 515 | 515 |
| BMS1P5    | -0.0418  | 0.343788 | 0.465905 | 515 | 515 |
| MRPS27    | -0.04179 | 0.343903 | 0.466029 | 515 | 515 |
| CYP4F2    | -0.04176 | 0.344228 | 0.466279 | 515 | 135 |
| PIK3R3    | -0.04176 | 0.344268 | 0.466303 | 515 | 515 |
| RAB18     | -0.04173 | 0.344558 | 0.466632 | 515 | 515 |
| EPHA5     | -0.04171 | 0.34482  | 0.466924 | 515 | 328 |
| PNLIPRP1  | -0.0417  | 0.344979 | 0.467078 | 515 | 42  |
| PLXNB2    | -0.04168 | 0.345199 | 0.46731  | 515 | 515 |
| RPF1      | -0.04167 | 0.34524  | 0.467334 | 515 | 515 |
| NDRG1     | -0.04161 | 0.345991 | 0.468141 | 515 | 515 |
| DCUN1D4   | -0.04157 | 0.346475 | 0.468656 | 515 | 515 |
| TEX19     | -0.04155 | 0.346636 | 0.468717 | 515 | 422 |
| KRTAP10-1 | -0.04155 | 0.346637 | 0.468717 | 515 | 7   |
| OR2M4     | -0.04155 | 0.346727 | 0.46876  | 515 | 7   |
| CYP2R1    | -0.04153 | 0.346945 | 0.469007 | 515 | 515 |
| JUB       | -0.04147 | 0.347652 | 0.469868 | 515 | 515 |
| UTP11L    | -0.04145 | 0.347805 | 0.470029 | 515 | 515 |

|           |          |          |          |     |     |
|-----------|----------|----------|----------|-----|-----|
| C6orf168  | -0.04142 | 0.348203 | 0.470485 | 515 | 515 |
| VPS4A     | -0.0414  | 0.348413 | 0.470737 | 515 | 515 |
| GBA       | -0.04139 | 0.348595 | 0.470919 | 515 | 515 |
| TIGD1     | -0.04134 | 0.349103 | 0.471478 | 515 | 515 |
| IGSF5     | -0.04133 | 0.349192 | 0.471496 | 515 | 418 |
| C14orf174 | -0.04128 | 0.349801 | 0.472165 | 515 | 514 |
| REP15     | -0.04125 | 0.350212 | 0.472601 | 515 | 515 |
| CYP3A4    | -0.04125 | 0.350218 | 0.472601 | 515 | 278 |
| ATXN7L2   | -0.04124 | 0.350292 | 0.472669 | 515 | 515 |
| BCL2L2    | -0.04123 | 0.350456 | 0.472794 | 515 | 515 |
| GORAB     | -0.04121 | 0.350633 | 0.47297  | 515 | 515 |
| TCF3      | -0.04121 | 0.350641 | 0.47297  | 515 | 515 |
| SDK1      | -0.04121 | 0.350657 | 0.47297  | 515 | 515 |
| LOC100133 | -0.0412  | 0.350825 | 0.4731   | 515 | 514 |
| COX7C     | -0.04115 | 0.351307 | 0.473507 | 515 | 515 |
| OIP5      | -0.04115 | 0.35137  | 0.473515 | 515 | 515 |
| PECI      | -0.04113 | 0.351573 | 0.473725 | 515 | 515 |
| CEBPG     | -0.04113 | 0.351601 | 0.473731 | 515 | 515 |
| LOC440957 | -0.0411  | 0.351964 | 0.474188 | 515 | 515 |
| INCENP    | -0.04102 | 0.352925 | 0.475355 | 515 | 515 |
| RABGGTA   | -0.04099 | 0.353243 | 0.475719 | 515 | 515 |
| ERI2      | -0.04096 | 0.353538 | 0.476021 | 515 | 515 |
| APPL2     | -0.04096 | 0.353603 | 0.476074 | 515 | 515 |
| LIAS      | -0.04092 | 0.354047 | 0.476545 | 515 | 515 |
| ZBTB8B    | -0.04089 | 0.354392 | 0.476977 | 515 | 362 |
| DPY19L4   | -0.04089 | 0.354448 | 0.47702  | 515 | 515 |
| PRAMEF9   | -0.04085 | 0.354871 | 0.477525 | 515 | 9   |
| LOC285419 | -0.0408  | 0.355453 | 0.478117 | 515 | 503 |
| MAPK15    | -0.04078 | 0.355756 | 0.478395 | 515 | 510 |
| CNTN5     | -0.04073 | 0.356271 | 0.478975 | 515 | 414 |
| DHRS1     | -0.04073 | 0.356283 | 0.478975 | 515 | 515 |
| GNL3L     | -0.04068 | 0.356851 | 0.479608 | 515 | 515 |
| HS6ST3    | -0.04063 | 0.357424 | 0.48025  | 515 | 463 |
| FBXO11    | -0.04063 | 0.357502 | 0.48029  | 515 | 515 |
| C20orf29  | -0.04061 | 0.357678 | 0.480481 | 515 | 515 |
| CRISP3    | -0.04061 | 0.357699 | 0.480481 | 515 | 352 |
| SUCLG1    | -0.04061 | 0.357716 | 0.480481 | 515 | 515 |
| POU5F1    | -0.0406  | 0.357812 | 0.480544 | 515 | 506 |
| LEUTX     | -0.04058 | 0.358073 | 0.480863 | 515 | 10  |
| ACE2      | -0.04056 | 0.358291 | 0.48112  | 515 | 514 |
| SNORA39   | -0.04051 | 0.358913 | 0.481894 | 515 | 504 |
| C7orf54   | -0.04051 | 0.358939 | 0.481896 | 515 | 473 |
| PEX26     | -0.04049 | 0.359134 | 0.482126 | 515 | 515 |
| OMA1      | -0.04043 | 0.359841 | 0.482977 | 515 | 515 |
| RPS7      | -0.04043 | 0.359886 | 0.483006 | 515 | 515 |
| SSFA2     | -0.04042 | 0.36     | 0.483126 | 515 | 515 |
| MMEL1     | -0.04039 | 0.360297 | 0.483456 | 515 | 476 |
| GNG13     | -0.04039 | 0.360342 | 0.483456 | 515 | 337 |
| FLJ30679  | -0.04037 | 0.360559 | 0.483682 | 515 | 308 |
| XRCC6BP1  | -0.04035 | 0.360814 | 0.483958 | 515 | 515 |
| KCNK3     | -0.04035 | 0.360842 | 0.483964 | 515 | 515 |
| C3orf24   | -0.04034 | 0.360936 | 0.484025 | 515 | 150 |
| GATS      | -0.04032 | 0.361186 | 0.484295 | 515 | 515 |
| ADRA2B    | -0.0403  | 0.361455 | 0.484526 | 515 | 509 |

|           |          |          |          |     |     |
|-----------|----------|----------|----------|-----|-----|
| KRTDAP    | -0.04027 | 0.361759 | 0.484836 | 515 | 94  |
| RPS16     | -0.04026 | 0.361851 | 0.484926 | 515 | 515 |
| TAGLN2    | -0.04024 | 0.362165 | 0.485282 | 515 | 515 |
| CDKN1C    | -0.04023 | 0.362233 | 0.485341 | 515 | 515 |
| RGS7      | -0.04022 | 0.362308 | 0.485409 | 515 | 406 |
| MTHFR     | -0.0402  | 0.362581 | 0.485677 | 515 | 515 |
| HCG9      | -0.04018 | 0.362784 | 0.485872 | 515 | 181 |
| C17orf68  | -0.04018 | 0.362848 | 0.485904 | 515 | 515 |
| ITSN1     | -0.04012 | 0.363501 | 0.486648 | 515 | 515 |
| KIAA0415  | -0.04011 | 0.36364  | 0.486769 | 515 | 515 |
| BRD8      | -0.04007 | 0.364187 | 0.487423 | 515 | 515 |
| LOC646471 | -0.04006 | 0.364283 | 0.487499 | 515 | 515 |
| POLR3D    | -0.04005 | 0.3644   | 0.487618 | 515 | 515 |
| FAM71C    | -0.04004 | 0.364496 | 0.487643 | 515 | 77  |
| TCEAL4    | -0.04004 | 0.364505 | 0.487643 | 515 | 515 |
| WNT7B     | -0.04004 | 0.364533 | 0.487643 | 515 | 515 |
| HAUS4     | -0.03999 | 0.365055 | 0.488271 | 515 | 515 |
| DISP2     | -0.03996 | 0.365442 | 0.488723 | 515 | 515 |
| C1orf213  | -0.03995 | 0.365546 | 0.488774 | 515 | 515 |
| GABRD     | -0.03995 | 0.365553 | 0.488774 | 515 | 513 |
| POM121L2  | -0.03995 | 0.365626 | 0.488806 | 515 | 328 |
| LOC100132 | -0.03994 | 0.365693 | 0.488863 | 515 | 515 |
| FLJ10661  | -0.03987 | 0.366541 | 0.489898 | 515 | 515 |
| GJC3      | -0.03986 | 0.366656 | 0.489986 | 515 | 412 |
| GPR149    | -0.03985 | 0.366787 | 0.490129 | 515 | 40  |
| BAT2L1    | -0.03984 | 0.3669   | 0.490244 | 515 | 515 |
| C2orf56   | -0.03984 | 0.366923 | 0.490244 | 515 | 515 |
| KIAA0174  | -0.03983 | 0.36698  | 0.490288 | 515 | 515 |
| COX4NB    | -0.03981 | 0.367236 | 0.490597 | 515 | 515 |
| CHCHD4    | -0.0398  | 0.367399 | 0.490782 | 515 | 515 |
| C2orf44   | -0.03978 | 0.367629 | 0.491024 | 515 | 515 |
| GCDH      | -0.03976 | 0.367817 | 0.491196 | 515 | 515 |
| ETFB      | -0.03976 | 0.367832 | 0.491196 | 515 | 515 |
| AKR1B15   | -0.03971 | 0.368436 | 0.491871 | 515 | 381 |
| AVP       | -0.0397  | 0.368601 | 0.491993 | 515 | 43  |
| RFPL3     | -0.03969 | 0.368667 | 0.492011 | 515 | 150 |
| PPF1BP2   | -0.03969 | 0.368687 | 0.492011 | 515 | 515 |
| SETD3     | -0.03967 | 0.36893  | 0.492301 | 515 | 515 |
| NBPF1     | -0.03965 | 0.369192 | 0.492617 | 515 | 515 |
| JPH3      | -0.03964 | 0.369306 | 0.492737 | 515 | 498 |
| KRTAP9-4  | -0.03963 | 0.36944  | 0.492868 | 515 | 6   |
| JUND      | -0.03963 | 0.369489 | 0.492868 | 515 | 515 |
| RNF126    | -0.03963 | 0.369496 | 0.492868 | 515 | 515 |
| ZNF524    | -0.03963 | 0.369503 | 0.492868 | 515 | 515 |
| FAH       | -0.03962 | 0.36957  | 0.492924 | 515 | 515 |
| LIPF      | -0.03961 | 0.369688 | 0.493049 | 515 | 98  |
| 11-Mar    | -0.03958 | 0.369991 | 0.493387 | 515 | 88  |
| C8orf4    | -0.03958 | 0.370072 | 0.493462 | 515 | 515 |
| NAA16     | -0.03957 | 0.370198 | 0.493564 | 515 | 515 |
| C1orf9    | -0.03955 | 0.370425 | 0.493834 | 515 | 515 |
| DYTN      | -0.03954 | 0.370501 | 0.493861 | 515 | 20  |
| FAM71E2   | -0.03954 | 0.370519 | 0.493861 | 515 | 248 |
| ADAP1     | -0.03952 | 0.370758 | 0.494063 | 515 | 515 |
| IL17RD    | -0.03952 | 0.370776 | 0.494063 | 515 | 515 |

|           |          |          |          |     |     |
|-----------|----------|----------|----------|-----|-----|
| POM121    | -0.03951 | 0.370898 | 0.494138 | 515 | 515 |
| SPA17     | -0.03951 | 0.3709   | 0.494138 | 515 | 515 |
| NRL       | -0.0395  | 0.37097  | 0.494165 | 515 | 515 |
| PTPLA     | -0.03949 | 0.371192 | 0.494395 | 515 | 515 |
| CCDC55    | -0.03946 | 0.371517 | 0.494728 | 515 | 515 |
| YPEL1     | -0.03945 | 0.371673 | 0.494871 | 515 | 515 |
| C12orf12  | -0.03943 | 0.37181  | 0.49501  | 515 | 25  |
| ECEL1     | -0.03942 | 0.371932 | 0.495037 | 515 | 504 |
| NCRNA0011 | -0.03942 | 0.371981 | 0.49505  | 515 | 15  |
| SNX4      | -0.0394  | 0.37228  | 0.495382 | 515 | 515 |
| TMEM88    | -0.03937 | 0.372574 | 0.495741 | 515 | 515 |
| ZNF607    | -0.03936 | 0.372708 | 0.495886 | 515 | 515 |
| B3GNT3    | -0.03934 | 0.372919 | 0.496134 | 515 | 515 |
| THRSP     | -0.03934 | 0.372961 | 0.496156 | 515 | 321 |
| KRTAP3-2  | -0.03933 | 0.373138 | 0.496358 | 515 | 78  |
| AGL       | -0.03926 | 0.373991 | 0.497196 | 515 | 515 |
| DHX35     | -0.03925 | 0.374072 | 0.49727  | 515 | 515 |
| RABL5     | -0.03919 | 0.374823 | 0.498168 | 515 | 515 |
| LRP5L     | -0.03917 | 0.375043 | 0.498429 | 515 | 515 |
| KSR2      | -0.03915 | 0.375301 | 0.498738 | 515 | 513 |
| ABHD8     | -0.03914 | 0.375355 | 0.498776 | 515 | 515 |
| WBSCR27   | -0.0391  | 0.375854 | 0.49924  | 515 | 515 |
| HIST1H4J  | -0.03905 | 0.376483 | 0.499943 | 515 | 515 |
| CIZ1      | -0.03903 | 0.376702 | 0.5002   | 515 | 515 |
| SEC1      | -0.03903 | 0.376797 | 0.500288 | 515 | 513 |
| LOC91149  | -0.03902 | 0.376818 | 0.500288 | 515 | 143 |
| TXNRD1    | -0.03899 | 0.377279 | 0.500821 | 515 | 515 |
| PPCDC     | -0.03898 | 0.377295 | 0.500821 | 515 | 515 |
| TMIE      | -0.03896 | 0.377654 | 0.501265 | 515 | 513 |
| SPRY3     | -0.03894 | 0.37789  | 0.501512 | 515 | 515 |
| ENOPH1    | -0.03893 | 0.377986 | 0.501605 | 515 | 515 |
| C3orf74   | -0.03892 | 0.37806  | 0.50167  | 515 | 155 |
| HSPB1     | -0.0389  | 0.378316 | 0.501978 | 515 | 515 |
| ASAH2B    | -0.03886 | 0.378818 | 0.50247  | 515 | 503 |
| PRPF31    | -0.03885 | 0.378927 | 0.502521 | 515 | 515 |
| NBEAL1    | -0.03883 | 0.379199 | 0.502755 | 515 | 515 |
| SLURP1    | -0.03883 | 0.379204 | 0.502755 | 515 | 132 |
| ZWINT     | -0.0388  | 0.379611 | 0.503194 | 515 | 515 |
| MID1      | -0.03878 | 0.379803 | 0.503382 | 515 | 515 |
| PIGG      | -0.03875 | 0.380179 | 0.503847 | 515 | 515 |
| TBC1D24   | -0.03873 | 0.380412 | 0.504123 | 515 | 515 |
| HES4      | -0.03872 | 0.380514 | 0.504224 | 515 | 515 |
| PSMD2     | -0.0387  | 0.380796 | 0.504472 | 515 | 515 |
| TCFL5     | -0.0387  | 0.380807 | 0.504472 | 515 | 515 |
| LOC100133 | -0.03869 | 0.380938 | 0.504551 | 515 | 103 |
| NPY1R     | -0.03863 | 0.381693 | 0.505417 | 515 | 508 |
| QRFP      | -0.03862 | 0.381788 | 0.50551  | 515 | 424 |
| MRPL47    | -0.0386  | 0.382    | 0.505723 | 515 | 515 |
| VTCN1     | -0.03859 | 0.382162 | 0.505871 | 515 | 512 |
| SPANXA2   | -0.03854 | 0.38275  | 0.506549 | 515 | 69  |
| VPS26A    | -0.03854 | 0.382811 | 0.506596 | 515 | 515 |
| PPP1R13L  | -0.03853 | 0.382878 | 0.506651 | 515 | 515 |
| TRIM77    | -0.03853 | 0.382941 | 0.506695 | 515 | 7   |
| CELF5     | -0.03852 | 0.382962 | 0.506695 | 515 | 496 |

|           |          |          |          |     |     |
|-----------|----------|----------|----------|-----|-----|
| COX8C     | -0.03851 | 0.38314  | 0.506897 | 515 | 170 |
| HCG11     | -0.0385  | 0.383265 | 0.506974 | 515 | 515 |
| POU4F2    | -0.0385  | 0.383275 | 0.506974 | 515 | 72  |
| NASP      | -0.03847 | 0.38361  | 0.507317 | 515 | 515 |
| NKX2-4    | -0.03846 | 0.383812 | 0.507517 | 515 | 111 |
| ACOT12    | -0.03844 | 0.384003 | 0.507703 | 515 | 97  |
| GRIN2B    | -0.03842 | 0.384233 | 0.50794  | 515 | 115 |
| ZNF720    | -0.0384  | 0.38448  | 0.508164 | 515 | 515 |
| C6orf138  | -0.03839 | 0.384679 | 0.508316 | 515 | 512 |
| CLTCL1    | -0.03835 | 0.385121 | 0.508811 | 515 | 515 |
| EEF2      | -0.03834 | 0.385281 | 0.508971 | 515 | 515 |
| RET       | -0.03833 | 0.385349 | 0.509012 | 515 | 515 |
| IRAK1BP1  | -0.03827 | 0.386117 | 0.509756 | 515 | 515 |
| COL9A2    | -0.03827 | 0.386146 | 0.50976  | 515 | 515 |
| ABCF2     | -0.03826 | 0.38624  | 0.509784 | 515 | 515 |
| ZNF618    | -0.03825 | 0.386342 | 0.509884 | 515 | 515 |
| LOC100128 | -0.03824 | 0.386537 | 0.510109 | 515 | 226 |
| CSTF3     | -0.03821 | 0.386803 | 0.510426 | 515 | 515 |
| TNFRSF21  | -0.03821 | 0.386842 | 0.510444 | 515 | 515 |
| ZFP91-CNT | -0.0382  | 0.386927 | 0.510522 | 515 | 165 |
| ATE1      | -0.03819 | 0.387049 | 0.510634 | 515 | 515 |
| RPP25     | -0.03819 | 0.387088 | 0.510634 | 515 | 515 |
| TAZ       | -0.03816 | 0.387491 | 0.511064 | 515 | 515 |
| CPA2      | -0.03813 | 0.387813 | 0.511387 | 515 | 179 |
| PRSS45    | -0.03812 | 0.388037 | 0.511604 | 515 | 446 |
| GABRA6    | -0.03811 | 0.388123 | 0.51166  | 515 | 36  |
| PHF13     | -0.03809 | 0.388308 | 0.511872 | 515 | 515 |
| PPP4R1    | -0.03801 | 0.389316 | 0.512932 | 515 | 515 |
| SERP1     | -0.03799 | 0.389558 | 0.513215 | 515 | 515 |
| CIC       | -0.03798 | 0.389706 | 0.513342 | 515 | 515 |
| PRDM16    | -0.03794 | 0.390199 | 0.513889 | 515 | 515 |
| TAF10     | -0.03794 | 0.390238 | 0.513901 | 515 | 515 |
| SHISA6    | -0.03794 | 0.39027  | 0.513901 | 515 | 337 |
| C17orf78  | -0.03793 | 0.390353 | 0.513957 | 515 | 260 |
| UGT1A1    | -0.03786 | 0.39122  | 0.515031 | 515 | 215 |
| C17orf101 | -0.03782 | 0.391731 | 0.515568 | 515 | 515 |
| USP53     | -0.03778 | 0.392181 | 0.516032 | 515 | 515 |
| BNIP1     | -0.03777 | 0.392318 | 0.516102 | 515 | 514 |
| CRP       | -0.03775 | 0.392566 | 0.516257 | 515 | 284 |
| IQCF5     | -0.03775 | 0.392591 | 0.516257 | 515 | 13  |
| MRPL41    | -0.03771 | 0.393135 | 0.516904 | 515 | 515 |
| PRTFDC1   | -0.03769 | 0.393372 | 0.517149 | 515 | 515 |
| SSX2IP    | -0.03767 | 0.393548 | 0.517312 | 515 | 515 |
| C4orf52   | -0.03767 | 0.393595 | 0.51733  | 515 | 515 |
| RGMA      | -0.03767 | 0.393614 | 0.51733  | 515 | 514 |
| KRTAP5-3  | -0.03765 | 0.393916 | 0.517631 | 515 | 31  |
| SLC6A3    | -0.03761 | 0.394375 | 0.51816  | 515 | 486 |
| MAN2B2    | -0.0376  | 0.394508 | 0.518267 | 515 | 515 |
| ELF5      | -0.03755 | 0.395146 | 0.5189   | 515 | 506 |
| TUBA3E    | -0.03753 | 0.395318 | 0.519024 | 515 | 349 |
| DYSFIP1   | -0.03751 | 0.395573 | 0.519257 | 515 | 273 |
| TBC1D16   | -0.03746 | 0.396249 | 0.520076 | 515 | 515 |
| NF1       | -0.03746 | 0.396309 | 0.52012  | 515 | 515 |
| PLEC      | -0.03742 | 0.396766 | 0.520651 | 515 | 515 |

|           |          |          |          |     |     |
|-----------|----------|----------|----------|-----|-----|
| ANXA2P3   | -0.03741 | 0.396853 | 0.520717 | 515 | 511 |
| C22orf42  | -0.03733 | 0.397887 | 0.521882 | 515 | 14  |
| CELA3B    | -0.0373  | 0.398304 | 0.522319 | 515 | 84  |
| VSIG8     | -0.03729 | 0.398406 | 0.522358 | 515 | 431 |
| WDR52     | -0.03722 | 0.399296 | 0.523318 | 515 | 515 |
| PITPNM2   | -0.03716 | 0.400066 | 0.524224 | 515 | 515 |
| SNHG10    | -0.03715 | 0.400205 | 0.524338 | 515 | 515 |
| HMP19     | -0.03714 | 0.40029  | 0.524384 | 515 | 404 |
| GGN       | -0.03713 | 0.400456 | 0.524563 | 515 | 512 |
| RPL26     | -0.03712 | 0.400619 | 0.524708 | 515 | 515 |
| MARK3     | -0.03709 | 0.400876 | 0.524941 | 515 | 515 |
| GRIN2D    | -0.03708 | 0.401019 | 0.525094 | 515 | 515 |
| SSX3      | -0.03705 | 0.401472 | 0.525619 | 515 | 69  |
| PCDHGA8   | -0.03704 | 0.401517 | 0.525643 | 515 | 510 |
| RRP7A     | -0.03704 | 0.401612 | 0.525727 | 515 | 515 |
| COPS2     | -0.03704 | 0.401634 | 0.525727 | 515 | 515 |
| C20orf197 | -0.03703 | 0.40173  | 0.525819 | 515 | 504 |
| LOC151534 | -0.03696 | 0.402648 | 0.526952 | 515 | 515 |
| AMTN      | -0.03694 | 0.402809 | 0.527121 | 515 | 230 |
| PGP       | -0.03694 | 0.402883 | 0.527121 | 515 | 515 |
| TMEM14C   | -0.03691 | 0.40326  | 0.527476 | 515 | 515 |
| ORM2      | -0.0369  | 0.403378 | 0.52757  | 515 | 488 |
| HRC       | -0.0369  | 0.403384 | 0.52757  | 515 | 513 |
| C1orf84   | -0.03689 | 0.403528 | 0.527688 | 515 | 515 |
| AQP3      | -0.03686 | 0.403915 | 0.528126 | 515 | 515 |
| FLJ25758  | -0.03683 | 0.404236 | 0.528462 | 515 | 56  |
| ACTL6A    | -0.03682 | 0.404321 | 0.528518 | 515 | 515 |
| TOR1AIP2  | -0.03682 | 0.404438 | 0.528636 | 515 | 515 |
| HYAL1     | -0.0368  | 0.404675 | 0.528877 | 515 | 515 |
| SLC17A1   | -0.03678 | 0.404875 | 0.52907  | 515 | 123 |
| SLC45A2   | -0.03676 | 0.405112 | 0.529344 | 515 | 395 |
| RGPD4     | -0.03676 | 0.405174 | 0.529391 | 515 | 515 |
| LGR5      | -0.03675 | 0.405207 | 0.5294   | 515 | 508 |
| E2F8      | -0.03675 | 0.405274 | 0.529452 | 515 | 515 |
| DENR      | -0.03672 | 0.405645 | 0.529867 | 515 | 515 |
| WBP2      | -0.03665 | 0.406546 | 0.530778 | 515 | 515 |
| HIST1H1B  | -0.03663 | 0.406772 | 0.530992 | 515 | 388 |
| COX19     | -0.03663 | 0.406838 | 0.531038 | 515 | 515 |
| TPRXL     | -0.03662 | 0.406877 | 0.531038 | 515 | 429 |
| PNMA2     | -0.03662 | 0.406887 | 0.531038 | 515 | 515 |
| PCDHA12   | -0.03661 | 0.407107 | 0.531256 | 515 | 507 |
| C1orf170  | -0.03659 | 0.407259 | 0.531385 | 515 | 514 |
| NUDT16    | -0.03658 | 0.407388 | 0.531499 | 515 | 515 |
| SNRNP25   | -0.03658 | 0.407399 | 0.531499 | 515 | 515 |
| ITPKB     | -0.03657 | 0.407563 | 0.531678 | 515 | 515 |
| TMEM92    | -0.03655 | 0.407867 | 0.532005 | 515 | 515 |
| PPP1R15B  | -0.03653 | 0.408066 | 0.53223  | 515 | 515 |
| GHRHR     | -0.03651 | 0.408337 | 0.532514 | 515 | 106 |
| MLL3      | -0.03649 | 0.408558 | 0.532732 | 515 | 515 |
| DSEL      | -0.03649 | 0.408618 | 0.532741 | 515 | 515 |
| KRTAP10-9 | -0.03648 | 0.408675 | 0.532781 | 515 | 4   |
| MYO5B     | -0.03646 | 0.408967 | 0.53299  | 515 | 515 |
| MAGED4    | -0.03646 | 0.408984 | 0.53299  | 515 | 515 |
| PAX2      | -0.03646 | 0.409028 | 0.532998 | 515 | 159 |

|           |          |          |          |     |     |
|-----------|----------|----------|----------|-----|-----|
| KRT17     | -0.03644 | 0.409244 | 0.533244 | 515 | 515 |
| CCDC41    | -0.03643 | 0.409336 | 0.533329 | 515 | 515 |
| NANP      | -0.03643 | 0.409412 | 0.533393 | 515 | 515 |
| SLFNL1    | -0.03642 | 0.409505 | 0.533481 | 515 | 514 |
| PHKB      | -0.03642 | 0.409568 | 0.533527 | 515 | 515 |
| LOC100131 | -0.03641 | 0.409674 | 0.533595 | 515 | 515 |
| OXGR1     | -0.0364  | 0.409727 | 0.53363  | 515 | 399 |
| ECD       | -0.03637 | 0.410131 | 0.534122 | 515 | 515 |
| TMEM30C   | -0.03635 | 0.410443 | 0.534424 | 515 | 10  |
| GLTSCR2   | -0.03633 | 0.410603 | 0.534563 | 515 | 515 |
| MORN4     | -0.03633 | 0.410663 | 0.534605 | 515 | 515 |
| PF4V1     | -0.03633 | 0.41069  | 0.534605 | 515 | 315 |
| PPP3R1    | -0.03631 | 0.410877 | 0.534815 | 515 | 515 |
| SCARNA12  | -0.03631 | 0.410949 | 0.53485  | 515 | 504 |
| EIF3D     | -0.0363  | 0.411002 | 0.534872 | 515 | 515 |
| CDRT15P   | -0.03627 | 0.411434 | 0.53535  | 515 | 510 |
| RBBP9     | -0.03627 | 0.411473 | 0.53535  | 515 | 515 |
| UGT1A5    | -0.03627 | 0.411476 | 0.53535  | 515 | 71  |
| C19orf57  | -0.03626 | 0.411535 | 0.535356 | 515 | 515 |
| STOML2    | -0.03626 | 0.411567 | 0.535364 | 515 | 515 |
| PSTK      | -0.03625 | 0.411648 | 0.5354   | 515 | 515 |
| SLC2A10   | -0.03624 | 0.411864 | 0.535646 | 515 | 515 |
| KIAA1107  | -0.03622 | 0.412062 | 0.535763 | 515 | 515 |
| LMLN      | -0.03621 | 0.412156 | 0.535852 | 515 | 515 |
| VPS54     | -0.03619 | 0.412421 | 0.536126 | 515 | 515 |
| APLN      | -0.03617 | 0.412704 | 0.536389 | 515 | 515 |
| ZNF716    | -0.03614 | 0.413092 | 0.536743 | 515 | 126 |
| ZACN      | -0.03614 | 0.41311  | 0.536743 | 515 | 348 |
| PSRC1     | -0.03614 | 0.413167 | 0.536782 | 515 | 515 |
| ZNF259    | -0.03613 | 0.413255 | 0.536861 | 515 | 515 |
| EXOC4     | -0.03612 | 0.413425 | 0.537012 | 515 | 515 |
| SDR9C7    | -0.03611 | 0.413492 | 0.537064 | 515 | 105 |
| UCHL3     | -0.03606 | 0.41413  | 0.537719 | 515 | 515 |
| CTXN2     | -0.03605 | 0.414263 | 0.53782  | 515 | 232 |
| GNAT3     | -0.03603 | 0.414602 | 0.538191 | 515 | 37  |
| CIDECP    | -0.03602 | 0.414642 | 0.538208 | 515 | 515 |
| ZAR1L     | -0.03601 | 0.414823 | 0.538373 | 515 | 260 |
| CPSF2     | -0.036   | 0.414869 | 0.538398 | 515 | 515 |
| TCEB1     | -0.03599 | 0.415078 | 0.538599 | 515 | 515 |
| LMAN2L    | -0.03594 | 0.415756 | 0.539329 | 515 | 515 |
| B4GALT7   | -0.03591 | 0.416034 | 0.539595 | 515 | 515 |
| PLAG1     | -0.0359  | 0.416189 | 0.53976  | 515 | 515 |
| ATRIP     | -0.03589 | 0.416335 | 0.53988  | 515 | 515 |
| C1orf68   | -0.03589 | 0.416404 | 0.539935 | 515 | 7   |
| NCRNA0010 | -0.03587 | 0.416591 | 0.540107 | 515 | 515 |
| COX16     | -0.03577 | 0.417956 | 0.541351 | 515 | 515 |
| OPN1SW    | -0.03576 | 0.418062 | 0.541452 | 515 | 449 |
| TRPC4AP   | -0.03573 | 0.418405 | 0.541826 | 515 | 515 |
| NLRP10    | -0.03571 | 0.418712 | 0.542153 | 515 | 65  |
| ZNF91     | -0.0357  | 0.418894 | 0.542318 | 515 | 515 |
| LOC284379 | -0.03569 | 0.418999 | 0.542419 | 515 | 50  |
| KL        | -0.03568 | 0.419028 | 0.542421 | 515 | 515 |
| C9orf114  | -0.03567 | 0.419242 | 0.542663 | 515 | 515 |
| LIMD1     | -0.03564 | 0.419614 | 0.543075 | 515 | 515 |



|          |          |          |          |     |     |
|----------|----------|----------|----------|-----|-----|
| VN1R4    | -0.03564 | 0.419615 | 0.543075 | 515 | 7   |
| CISD3    | -0.03562 | 0.419916 | 0.54336  | 515 | 515 |
| PIP5KL1  | -0.03561 | 0.41998  | 0.543408 | 515 | 515 |
| KRT37    | -0.03558 | 0.420411 | 0.54386  | 515 | 72  |
| RNF169   | -0.03557 | 0.420577 | 0.544039 | 515 | 515 |
| NPRL2    | -0.03556 | 0.420615 | 0.544053 | 515 | 515 |
| C5orf43  | -0.03556 | 0.420672 | 0.544092 | 515 | 515 |
| FAT1     | -0.03554 | 0.420919 | 0.544376 | 515 | 515 |
| SVOP     | -0.03553 | 0.421008 | 0.544386 | 515 | 223 |
| CYTSA    | -0.03552 | 0.421138 | 0.544518 | 515 | 515 |
| GAMT     | -0.03549 | 0.421516 | 0.544972 | 515 | 515 |
| KIAA0947 | -0.03549 | 0.421561 | 0.544995 | 515 | 515 |
| C13orf37 | -0.03547 | 0.421868 | 0.545299 | 515 | 515 |
| C7orf50  | -0.03546 | 0.421921 | 0.545314 | 515 | 515 |
| RBPJL    | -0.03543 | 0.422348 | 0.54573  | 515 | 146 |
| N4BP3    | -0.03543 | 0.422397 | 0.545757 | 515 | 515 |
| MUTED    | -0.0354  | 0.422755 | 0.546094 | 515 | 515 |
| DPH3B    | -0.0354  | 0.422767 | 0.546094 | 515 | 515 |
| HERC2P4  | -0.0354  | 0.422815 | 0.546121 | 515 | 403 |
| SOX6     | -0.03539 | 0.422848 | 0.546129 | 515 | 515 |
| MED1     | -0.03533 | 0.423609 | 0.546948 | 515 | 515 |
| OLFM4    | -0.03531 | 0.42397  | 0.547338 | 515 | 429 |
| TRMT5    | -0.03531 | 0.423976 | 0.547338 | 515 | 515 |
| ASB16    | -0.03529 | 0.424236 | 0.547638 | 515 | 515 |
| PRR15    | -0.03528 | 0.424389 | 0.5478   | 515 | 513 |
| SERGEF   | -0.03527 | 0.424521 | 0.5479   | 515 | 515 |
| FAF1     | -0.03526 | 0.424642 | 0.547992 | 515 | 515 |
| PDZD8    | -0.03526 | 0.424657 | 0.547992 | 515 | 515 |
| DSPP     | -0.03525 | 0.424689 | 0.547992 | 515 | 157 |
| MRPS12   | -0.03525 | 0.424706 | 0.547992 | 515 | 515 |
| STX16    | -0.03525 | 0.42473  | 0.547992 | 515 | 515 |
| KCTD15   | -0.03524 | 0.424802 | 0.54805  | 515 | 515 |
| INSL5    | -0.03523 | 0.425039 | 0.548209 | 515 | 85  |
| CRYBB3   | -0.03521 | 0.425218 | 0.548373 | 515 | 380 |
| PDP2     | -0.03521 | 0.425245 | 0.548373 | 515 | 515 |
| COBLL1   | -0.03515 | 0.42603  | 0.549245 | 515 | 515 |
| SYT13    | -0.03509 | 0.426852 | 0.550269 | 515 | 473 |
| ECHDC2   | -0.03505 | 0.427356 | 0.550883 | 515 | 515 |
| TLL2     | -0.03503 | 0.427639 | 0.551176 | 515 | 513 |
| HCG4P6   | -0.03502 | 0.427703 | 0.551209 | 515 | 499 |
| OR10Q1   | -0.03502 | 0.427719 | 0.551209 | 515 | 74  |
| C11orf80 | -0.03501 | 0.427915 | 0.55139  | 515 | 515 |
| TRIM71   | -0.03499 | 0.428211 | 0.5517   | 515 | 321 |
| CHGB     | -0.03496 | 0.428546 | 0.552025 | 515 | 493 |
| CRYM     | -0.03494 | 0.428745 | 0.55221  | 515 | 512 |
| FRMPD4   | -0.03493 | 0.428894 | 0.552366 | 515 | 253 |
| FAM45A   | -0.03491 | 0.429197 | 0.552679 | 515 | 515 |
| FAM60A   | -0.03491 | 0.429252 | 0.552686 | 515 | 515 |
| PSIMCT-1 | -0.0349  | 0.429311 | 0.55269  | 515 | 507 |
| CD2AP    | -0.03489 | 0.429498 | 0.55286  | 515 | 515 |
| SLC20A2  | -0.03488 | 0.429623 | 0.552939 | 515 | 515 |
| CABP4    | -0.03488 | 0.429643 | 0.552939 | 515 | 512 |
| LPIN2    | -0.03487 | 0.429679 | 0.552951 | 515 | 515 |
| SPRY1    | -0.03487 | 0.429769 | 0.55303  | 515 | 515 |

|           |          |          |          |     |     |
|-----------|----------|----------|----------|-----|-----|
| ALS2CR11  | -0.03486 | 0.429829 | 0.553072 | 515 | 506 |
| NSUN5P2   | -0.03486 | 0.429857 | 0.553073 | 515 | 515 |
| CARS      | -0.03486 | 0.429929 | 0.553094 | 515 | 515 |
| RGAG1     | -0.03481 | 0.430593 | 0.553841 | 515 | 455 |
| CCNF      | -0.03479 | 0.430769 | 0.554032 | 515 | 515 |
| CIAPIN1   | -0.03478 | 0.430892 | 0.554155 | 515 | 515 |
| REPS2     | -0.03477 | 0.431088 | 0.554353 | 515 | 515 |
| OR1L4     | -0.03477 | 0.431102 | 0.554353 | 515 | 34  |
| TIMM50    | -0.03476 | 0.431199 | 0.554443 | 515 | 515 |
| OR1J4     | -0.03474 | 0.431511 | 0.554737 | 515 | 178 |
| ASAP1IT1  | -0.03473 | 0.431657 | 0.55487  | 515 | 42  |
| LRRC8A    | -0.03472 | 0.43167  | 0.55487  | 515 | 515 |
| LIFR      | -0.0347  | 0.43196  | 0.555154 | 515 | 515 |
| NPSR1     | -0.0347  | 0.431975 | 0.555154 | 515 | 291 |
| ZNF785    | -0.03468 | 0.432279 | 0.555438 | 515 | 515 |
| ADAM3A    | -0.03459 | 0.433438 | 0.556561 | 515 | 25  |
| ENO1      | -0.03459 | 0.433446 | 0.556561 | 515 | 515 |
| WWP2      | -0.03459 | 0.433458 | 0.556561 | 515 | 515 |
| COQ5      | -0.03459 | 0.43346  | 0.556561 | 515 | 515 |
| AMPH      | -0.03458 | 0.433643 | 0.556761 | 515 | 512 |
| KIAA0100  | -0.03456 | 0.433898 | 0.557017 | 515 | 515 |
| USP35     | -0.03453 | 0.434231 | 0.557337 | 515 | 515 |
| RNASE11   | -0.03452 | 0.434355 | 0.557353 | 515 | 11  |
| SLC39A11  | -0.03451 | 0.434573 | 0.557573 | 515 | 515 |
| CDHR2     | -0.03451 | 0.434582 | 0.557573 | 515 | 401 |
| SECISBP2  | -0.03446 | 0.435172 | 0.558294 | 515 | 515 |
| GNB1      | -0.03445 | 0.435359 | 0.558497 | 515 | 515 |
| PERP      | -0.03444 | 0.435387 | 0.558498 | 515 | 515 |
| DCAF4L1   | -0.03443 | 0.435552 | 0.558674 | 515 | 507 |
| RPL18     | -0.03443 | 0.435633 | 0.558742 | 515 | 515 |
| ZDHHC22   | -0.03442 | 0.43577  | 0.558881 | 515 | 287 |
| PRB1      | -0.03441 | 0.435884 | 0.558992 | 515 | 79  |
| KRTAP10-1 | -0.0344  | 0.435953 | 0.559045 | 515 | 10  |
| CXorf48   | -0.03438 | 0.436247 | 0.55935  | 515 | 267 |
| GUF1      | -0.03437 | 0.436415 | 0.55953  | 515 | 515 |
| COL11A2   | -0.03435 | 0.436623 | 0.559686 | 515 | 512 |
| PTP4A3    | -0.03435 | 0.436649 | 0.559686 | 515 | 515 |
| LOC100130 | -0.03432 | 0.437068 | 0.560187 | 515 | 105 |
| LOC55908  | -0.0343  | 0.437301 | 0.560413 | 515 | 297 |
| CCND1     | -0.03429 | 0.4374   | 0.560463 | 515 | 515 |
| MRPS7     | -0.03421 | 0.438551 | 0.561583 | 515 | 515 |
| BRI3BP    | -0.0342  | 0.438625 | 0.561642 | 515 | 515 |
| PGPEP1L   | -0.03418 | 0.43891  | 0.561971 | 515 | 181 |
| KIAA1310  | -0.03417 | 0.439086 | 0.56216  | 515 | 515 |
| ZNF70     | -0.03413 | 0.439585 | 0.562608 | 515 | 515 |
| RPN1      | -0.03413 | 0.439651 | 0.562608 | 515 | 515 |
| CDK8      | -0.03413 | 0.439661 | 0.562608 | 515 | 515 |
| RNF20     | -0.03411 | 0.439882 | 0.562855 | 515 | 515 |
| CDY2B     | -0.03409 | 0.440137 | 0.563109 | 515 | 20  |
| NEDD8     | -0.03406 | 0.44051  | 0.563478 | 515 | 515 |
| NCOA1     | -0.03405 | 0.440659 | 0.563633 | 515 | 515 |
| TTC30B    | -0.03403 | 0.440909 | 0.563845 | 515 | 515 |
| SSPO      | -0.03403 | 0.440999 | 0.563905 | 515 | 510 |
| MOBK13    | -0.03402 | 0.441013 | 0.563905 | 515 | 515 |

|           |          |          |          |     |     |
|-----------|----------|----------|----------|-----|-----|
| GPR160    | -0.03402 | 0.441051 | 0.563918 | 515 | 515 |
| MB        | -0.03401 | 0.441201 | 0.564073 | 515 | 514 |
| OR13J1    | -0.03399 | 0.441482 | 0.564397 | 515 | 196 |
| MATN2     | -0.03396 | 0.441875 | 0.56479  | 515 | 515 |
| C20orf165 | -0.03387 | 0.443103 | 0.566143 | 515 | 507 |
| RBM12B    | -0.03387 | 0.443133 | 0.566145 | 515 | 515 |
| CSNK1G1   | -0.03386 | 0.443274 | 0.56629  | 515 | 515 |
| KCNK7     | -0.03378 | 0.444281 | 0.567426 | 515 | 508 |
| CFHR2     | -0.03378 | 0.444306 | 0.567426 | 515 | 42  |
| A1CF      | -0.03375 | 0.44471  | 0.567892 | 515 | 127 |
| FLJ44606  | -0.03375 | 0.444732 | 0.567892 | 515 | 515 |
| LOC221122 | -0.03374 | 0.444868 | 0.567999 | 515 | 157 |
| IL19      | -0.03373 | 0.444931 | 0.568044 | 515 | 267 |
| GPX5      | -0.03369 | 0.44549  | 0.568539 | 515 | 40  |
| CT47A6    | -0.03365 | 0.446045 | 0.569061 | 515 | 9   |
| MUC13     | -0.03365 | 0.446065 | 0.569061 | 515 | 504 |
| EMILIN3   | -0.03365 | 0.446079 | 0.569061 | 515 | 503 |
| ALPP      | -0.03365 | 0.446099 | 0.569061 | 515 | 472 |
| CYP4A11   | -0.03364 | 0.446148 | 0.569088 | 515 | 317 |
| LOC285045 | -0.03363 | 0.446383 | 0.569315 | 515 | 69  |
| USP9X     | -0.03359 | 0.446914 | 0.569919 | 515 | 515 |
| ELAVL3    | -0.03356 | 0.447293 | 0.570188 | 515 | 261 |
| ACPL2     | -0.03356 | 0.447302 | 0.570188 | 515 | 515 |
| FADD      | -0.03354 | 0.447614 | 0.570485 | 515 | 515 |
| KRI1      | -0.03353 | 0.447698 | 0.570555 | 515 | 515 |
| MST1P9    | -0.03352 | 0.447861 | 0.570727 | 515 | 514 |
| LOC100272 | -0.03351 | 0.447971 | 0.570794 | 515 | 515 |
| SLC5A5    | -0.0335  | 0.448125 | 0.570917 | 515 | 491 |
| DFNB59    | -0.03349 | 0.448171 | 0.570935 | 515 | 515 |
| AFG3L1    | -0.03348 | 0.448312 | 0.571047 | 515 | 515 |
| TRA2A     | -0.03347 | 0.448443 | 0.571104 | 515 | 515 |
| FGF4      | -0.03346 | 0.448649 | 0.571331 | 515 | 18  |
| EFHC1     | -0.03339 | 0.449547 | 0.572219 | 515 | 515 |
| ZCWPW2    | -0.03335 | 0.450076 | 0.572745 | 515 | 515 |
| HTR5A     | -0.03334 | 0.450213 | 0.572847 | 515 | 37  |
| SAG       | -0.03334 | 0.450265 | 0.572878 | 515 | 103 |
| SNORA77   | -0.03333 | 0.450443 | 0.573    | 515 | 6   |
| SIVA1     | -0.03332 | 0.450471 | 0.573    | 515 | 515 |
| SLC46A1   | -0.03332 | 0.450505 | 0.573    | 515 | 515 |
| TFE3      | -0.03329 | 0.450913 | 0.573337 | 515 | 515 |
| DEFB1     | -0.03328 | 0.45104  | 0.573461 | 515 | 502 |
| C8orf59   | -0.03327 | 0.451204 | 0.573598 | 515 | 515 |
| DOT1L     | -0.03325 | 0.451443 | 0.573828 | 515 | 515 |
| PTRH2     | -0.03325 | 0.451518 | 0.573886 | 515 | 515 |
| GYS1      | -0.03322 | 0.451911 | 0.57424  | 515 | 515 |
| ACTR1A    | -0.03316 | 0.452699 | 0.574986 | 515 | 515 |
| PMS2L5    | -0.03315 | 0.45282  | 0.575103 | 515 | 515 |
| GRB14     | -0.03315 | 0.452854 | 0.575109 | 515 | 515 |
| TTLL7     | -0.03315 | 0.452913 | 0.575111 | 515 | 512 |
| PLD3      | -0.03314 | 0.452944 | 0.575114 | 515 | 515 |
| C4orf48   | -0.03311 | 0.453384 | 0.575526 | 515 | 514 |
| NKAP      | -0.03308 | 0.453759 | 0.575966 | 515 | 515 |
| LOC388428 | -0.03306 | 0.454069 | 0.576323 | 515 | 122 |
| MGC4473   | -0.033   | 0.454893 | 0.577149 | 515 | 300 |

|           |          |          |          |     |     |
|-----------|----------|----------|----------|-----|-----|
| SLC2A1    | -0.033   | 0.454925 | 0.577153 | 515 | 515 |
| NAE1      | -0.03296 | 0.455396 | 0.577606 | 515 | 515 |
| USP24     | -0.03296 | 0.455427 | 0.577606 | 515 | 515 |
| CLTC      | -0.03293 | 0.455796 | 0.578001 | 515 | 515 |
| TSC22D1   | -0.03288 | 0.456508 | 0.578793 | 515 | 515 |
| TRIM72    | -0.03287 | 0.456616 | 0.578868 | 515 | 299 |
| MAGOHB    | -0.03285 | 0.456928 | 0.579215 | 515 | 515 |
| RNF6      | -0.03284 | 0.457119 | 0.579422 | 515 | 515 |
| BOLA3     | -0.03283 | 0.457209 | 0.57947  | 515 | 515 |
| ADD1      | -0.03279 | 0.457796 | 0.580067 | 515 | 515 |
| SPZ1      | -0.03278 | 0.457924 | 0.580111 | 515 | 45  |
| OR7E91P   | -0.03274 | 0.458403 | 0.580644 | 515 | 397 |
| YIPF7     | -0.03272 | 0.458797 | 0.581032 | 515 | 130 |
| SV2C      | -0.03271 | 0.458941 | 0.581179 | 515 | 279 |
| OR2T33    | -0.03266 | 0.459582 | 0.581695 | 515 | 21  |
| SKP2      | -0.03265 | 0.459677 | 0.581778 | 515 | 515 |
| ZNF735    | -0.03265 | 0.459729 | 0.581808 | 515 | 19  |
| OR7E156P  | -0.03263 | 0.46003  | 0.582152 | 515 | 51  |
| C11orf34  | -0.03262 | 0.460107 | 0.58217  | 515 | 254 |
| DCAF10    | -0.03262 | 0.460132 | 0.58217  | 515 | 515 |
| COL9A1    | -0.0326  | 0.460344 | 0.582327 | 515 | 412 |
| C4orf44   | -0.03255 | 0.461142 | 0.583042 | 515 | 509 |
| TYR       | -0.03253 | 0.461334 | 0.58321  | 515 | 82  |
| SLC16A8   | -0.03252 | 0.461452 | 0.583323 | 515 | 505 |
| C10orf95  | -0.03252 | 0.46149  | 0.583335 | 515 | 515 |
| ICT1      | -0.03251 | 0.461645 | 0.583456 | 515 | 515 |
| RBM38     | -0.0325  | 0.461744 | 0.583535 | 515 | 515 |
| MEMO1     | -0.0325  | 0.461766 | 0.583535 | 515 | 515 |
| FAM83A    | -0.03247 | 0.462194 | 0.583916 | 515 | 515 |
| EXOSC7    | -0.03247 | 0.462195 | 0.583916 | 515 | 515 |
| NSMCE1    | -0.03247 | 0.462213 | 0.583916 | 515 | 515 |
| GATAD2A   | -0.03243 | 0.462782 | 0.584497 | 515 | 515 |
| RAD23B    | -0.03243 | 0.46279  | 0.584497 | 515 | 515 |
| KLHDC2    | -0.0324  | 0.463117 | 0.584873 | 515 | 515 |
| KIAA1841  | -0.0324  | 0.463182 | 0.584918 | 515 | 515 |
| OR2T8     | -0.03239 | 0.463267 | 0.584988 | 515 | 62  |
| SMYD4     | -0.03239 | 0.46333  | 0.585031 | 515 | 515 |
| CUL9      | -0.03237 | 0.46352  | 0.58516  | 515 | 515 |
| LOC729234 | -0.03237 | 0.463607 | 0.585233 | 515 | 515 |
| ABHD12    | -0.03235 | 0.463815 | 0.585458 | 515 | 515 |
| OR8S1     | -0.03235 | 0.463873 | 0.585495 | 515 | 85  |
| WDR5B     | -0.03233 | 0.46408  | 0.585628 | 515 | 515 |
| RNF25     | -0.03233 | 0.464096 | 0.585628 | 515 | 515 |
| CDH18     | -0.03233 | 0.464096 | 0.585628 | 515 | 231 |
| SFRS17A   | -0.03233 | 0.46413  | 0.585635 | 515 | 515 |
| HIST1H3C  | -0.03232 | 0.464246 | 0.585743 | 515 | 307 |
| C8orf84   | -0.03231 | 0.464398 | 0.585861 | 515 | 515 |
| XAGE5     | -0.03228 | 0.464776 | 0.586227 | 515 | 28  |
| SYT5      | -0.03228 | 0.464797 | 0.586227 | 515 | 442 |
| ATG2B     | -0.03228 | 0.464826 | 0.586227 | 515 | 515 |
| VAV2      | -0.03228 | 0.464834 | 0.586227 | 515 | 515 |
| EIF4EBP3  | -0.03226 | 0.465115 | 0.586544 | 515 | 515 |
| SKIV2L2   | -0.03225 | 0.465237 | 0.58666  | 515 | 515 |
| RFC3      | -0.03223 | 0.465478 | 0.586853 | 515 | 515 |

|          |          |          |          |     |     |
|----------|----------|----------|----------|-----|-----|
| RMI1     | -0.03222 | 0.465606 | 0.58694  | 515 | 515 |
| MDM4     | -0.0322  | 0.465857 | 0.58722  | 515 | 515 |
| HOXB8    | -0.0322  | 0.465903 | 0.587241 | 515 | 474 |
| ISOC2    | -0.03218 | 0.466141 | 0.587505 | 515 | 515 |
| ZBTB80S  | -0.03216 | 0.466461 | 0.587796 | 515 | 515 |
| PRB2     | -0.03214 | 0.466697 | 0.588038 | 515 | 102 |
| CDNF     | -0.03214 | 0.466762 | 0.588048 | 515 | 515 |
| MAPK4    | -0.03214 | 0.46681  | 0.588051 | 515 | 498 |
| SPAG16   | -0.03211 | 0.467121 | 0.588405 | 515 | 515 |
| TAAR9    | -0.0321  | 0.467281 | 0.58857  | 515 | 8   |
| RHOT1    | -0.03209 | 0.467456 | 0.588716 | 515 | 515 |
| SDCBP2   | -0.03208 | 0.467565 | 0.588742 | 515 | 515 |
| PI4KAP2  | -0.03208 | 0.467634 | 0.588755 | 515 | 515 |
| SLC25A29 | -0.03207 | 0.467705 | 0.58877  | 515 | 515 |
| FOXO3B   | -0.03206 | 0.467806 | 0.588796 | 515 | 515 |
| TP53I3   | -0.03206 | 0.467814 | 0.588796 | 515 | 515 |
| DPPA3    | -0.03205 | 0.467963 | 0.588946 | 515 | 159 |
| HAO1     | -0.03205 | 0.468023 | 0.588984 | 515 | 125 |
| LYPD6B   | -0.03203 | 0.46822  | 0.589168 | 515 | 507 |
| CUZD1    | -0.03203 | 0.468228 | 0.589168 | 515 | 515 |
| ALKBH7   | -0.03201 | 0.468536 | 0.589519 | 515 | 515 |
| CLEC1B   | -0.032   | 0.468701 | 0.589627 | 515 | 85  |
| NCAPG2   | -0.032   | 0.46871  | 0.589627 | 515 | 515 |
| KIF4B    | -0.03199 | 0.468776 | 0.589673 | 515 | 512 |
| TOP1P1   | -0.03197 | 0.469082 | 0.589914 | 515 | 515 |
| KILLIN   | -0.03195 | 0.469352 | 0.590211 | 515 | 515 |
| HIST1H4B | -0.0319  | 0.470095 | 0.590966 | 515 | 273 |
| GOLGA6L6 | -0.03189 | 0.470274 | 0.591147 | 515 | 273 |
| FGF23    | -0.03186 | 0.470602 | 0.591522 | 515 | 182 |
| CDH9     | -0.03184 | 0.470871 | 0.591823 | 515 | 40  |
| PITX3    | -0.0318  | 0.471486 | 0.592411 | 515 | 288 |
| SDC1     | -0.03178 | 0.47176  | 0.592717 | 515 | 515 |
| MAP2K2   | -0.03176 | 0.472087 | 0.593054 | 515 | 515 |
| GPR50    | -0.03175 | 0.472194 | 0.59315  | 515 | 166 |
| KLK11    | -0.03173 | 0.472505 | 0.593467 | 515 | 508 |
| NBPF4    | -0.03172 | 0.472647 | 0.593608 | 515 | 253 |
| ANP32E   | -0.03171 | 0.472773 | 0.593728 | 515 | 515 |
| ARHGEF33 | -0.03169 | 0.472957 | 0.593885 | 515 | 510 |
| HNRPDL   | -0.03169 | 0.473006 | 0.593897 | 515 | 515 |
| CHST5    | -0.03167 | 0.47331  | 0.594142 | 515 | 487 |
| FLJ39609 | -0.03165 | 0.47356  | 0.594381 | 515 | 139 |
| OGDHL    | -0.03165 | 0.473591 | 0.594383 | 515 | 479 |
| SLAIN1   | -0.03161 | 0.474129 | 0.594945 | 515 | 515 |
| GNA11    | -0.0316  | 0.47423  | 0.595035 | 515 | 515 |
| LRIG1    | -0.0316  | 0.474322 | 0.595052 | 515 | 515 |
| LRRC66   | -0.0316  | 0.474333 | 0.595052 | 515 | 500 |
| FZR1     | -0.03158 | 0.4746   | 0.595312 | 515 | 515 |
| CHRND    | -0.03157 | 0.474713 | 0.5954   | 515 | 99  |
| TBC1D20  | -0.03157 | 0.474729 | 0.5954   | 515 | 515 |
| EIF3E    | -0.03154 | 0.475103 | 0.595794 | 515 | 515 |
| PET112L  | -0.03153 | 0.475309 | 0.595977 | 515 | 515 |
| CACNA1H  | -0.03152 | 0.475363 | 0.595983 | 515 | 515 |
| STH      | -0.03151 | 0.475563 | 0.596184 | 515 | 28  |
| PPP1R3F  | -0.0315  | 0.47565  | 0.596256 | 515 | 515 |

|           |          |          |          |     |     |
|-----------|----------|----------|----------|-----|-----|
| ABCA7     | -0.03148 | 0.475957 | 0.596602 | 515 | 515 |
| ACTR3C    | -0.03147 | 0.476098 | 0.596706 | 515 | 515 |
| RFK       | -0.03147 | 0.476099 | 0.596706 | 515 | 515 |
| KISS1     | -0.03139 | 0.477261 | 0.597975 | 515 | 492 |
| SCGB1D2   | -0.03138 | 0.47731  | 0.597999 | 515 | 77  |
| RPS3      | -0.03138 | 0.477351 | 0.598013 | 515 | 515 |
| DLG1      | -0.03136 | 0.477579 | 0.598153 | 515 | 515 |
| ZNF711    | -0.03136 | 0.477623 | 0.598166 | 515 | 515 |
| SLC7A3    | -0.03134 | 0.477851 | 0.598302 | 515 | 287 |
| STX10     | -0.03134 | 0.477927 | 0.598322 | 515 | 515 |
| PLEKHG5   | -0.03132 | 0.478206 | 0.598558 | 515 | 515 |
| ATP5C1    | -0.03131 | 0.478361 | 0.598676 | 515 | 515 |
| LOC650293 | -0.03131 | 0.47839  | 0.598676 | 515 | 48  |
| ACPP      | -0.0313  | 0.478449 | 0.598713 | 515 | 515 |
| ATP5L     | -0.0313  | 0.478494 | 0.598731 | 515 | 515 |
| NDUFA1    | -0.03129 | 0.478585 | 0.59877  | 515 | 515 |
| PROK1     | -0.03128 | 0.4787   | 0.598877 | 515 | 318 |
| B3GALT5   | -0.03126 | 0.478991 | 0.599056 | 515 | 391 |
| PSMG1     | -0.03125 | 0.479141 | 0.5992   | 515 | 515 |
| CLCC1     | -0.03123 | 0.479402 | 0.599402 | 515 | 515 |
| RBM9      | -0.03121 | 0.4798   | 0.599781 | 515 | 515 |
| SLC41A1   | -0.0312  | 0.479867 | 0.599781 | 515 | 515 |
| NHLRC1    | -0.0312  | 0.479915 | 0.599781 | 515 | 515 |
| ZNF827    | -0.0312  | 0.479947 | 0.599781 | 515 | 515 |
| KLHL38    | -0.03119 | 0.479963 | 0.599781 | 515 | 477 |
| GAS2L1    | -0.03119 | 0.480053 | 0.599857 | 515 | 515 |
| ELF2      | -0.03118 | 0.480131 | 0.599916 | 515 | 515 |
| OR7C1     | -0.03117 | 0.48029  | 0.600077 | 515 | 234 |
| C1orf185  | -0.03116 | 0.480423 | 0.600206 | 515 | 29  |
| ANGPT2    | -0.03114 | 0.480718 | 0.600487 | 515 | 515 |
| DEPDC7    | -0.03112 | 0.48098  | 0.600714 | 515 | 514 |
| RNF144A   | -0.03111 | 0.481081 | 0.600803 | 515 | 515 |
| LOC100131 | -0.03108 | 0.481639 | 0.60135  | 515 | 515 |
| OR1Q1     | -0.03107 | 0.481737 | 0.601434 | 515 | 156 |
| LOC643923 | -0.03106 | 0.481865 | 0.601519 | 515 | 47  |
| SCAMP1    | -0.03105 | 0.482023 | 0.601679 | 515 | 515 |
| FXN       | -0.03103 | 0.482217 | 0.601846 | 515 | 515 |
| SLC4A4    | -0.03103 | 0.482306 | 0.601918 | 515 | 515 |
| ATAD1     | -0.03102 | 0.482473 | 0.60209  | 515 | 515 |
| DEPDC5    | -0.03098 | 0.48292  | 0.602538 | 515 | 515 |
| TAS1R2    | -0.03098 | 0.482953 | 0.602538 | 515 | 58  |
| PCDHB5    | -0.03098 | 0.483007 | 0.602568 | 515 | 515 |
| TUSC2     | -0.03095 | 0.48344  | 0.603032 | 515 | 515 |
| C3orf23   | -0.03094 | 0.48356  | 0.603108 | 515 | 515 |
| AK2       | -0.03093 | 0.483739 | 0.603257 | 515 | 515 |
| FOXM1     | -0.03092 | 0.483801 | 0.603257 | 515 | 515 |
| PRMT3     | -0.0309  | 0.484148 | 0.603542 | 515 | 515 |
| UBAP1     | -0.03089 | 0.484318 | 0.603638 | 515 | 515 |
| TTC33     | -0.03086 | 0.484754 | 0.604069 | 515 | 515 |
| MSL1      | -0.03084 | 0.485028 | 0.604372 | 515 | 515 |
| ASB3      | -0.03081 | 0.485417 | 0.604719 | 515 | 515 |
| POLD3     | -0.03081 | 0.485427 | 0.604719 | 515 | 515 |
| RAB34     | -0.03077 | 0.485999 | 0.605243 | 515 | 515 |
| DLK1      | -0.03075 | 0.486211 | 0.605432 | 515 | 238 |

|           |          |          |          |     |     |
|-----------|----------|----------|----------|-----|-----|
| REEP6     | -0.03075 | 0.486243 | 0.605433 | 515 | 515 |
| PFN3      | -0.03073 | 0.486492 | 0.605692 | 515 | 36  |
| OR2B2     | -0.03072 | 0.486659 | 0.605763 | 515 | 36  |
| C20orf177 | -0.03072 | 0.486734 | 0.60578  | 515 | 515 |
| G6PC      | -0.03071 | 0.486819 | 0.605811 | 515 | 89  |
| PWRN2     | -0.03071 | 0.486844 | 0.605811 | 515 | 25  |
| DYNLL2    | -0.0307  | 0.486922 | 0.605864 | 515 | 515 |
| TRMT12    | -0.0307  | 0.48698  | 0.605872 | 515 | 515 |
| CCDC54    | -0.03069 | 0.487164 | 0.606013 | 515 | 290 |
| NTS       | -0.03067 | 0.487364 | 0.606187 | 515 | 447 |
| REV1      | -0.03063 | 0.487974 | 0.606833 | 515 | 515 |
| C12orf54  | -0.03062 | 0.488115 | 0.606971 | 515 | 264 |
| ZNF8      | -0.03059 | 0.488559 | 0.607484 | 515 | 515 |
| RHCG      | -0.03058 | 0.488703 | 0.607626 | 515 | 432 |
| NUDT7     | -0.03057 | 0.488749 | 0.607646 | 515 | 515 |
| CWC15     | -0.03055 | 0.489018 | 0.607905 | 515 | 515 |
| RAET1L    | -0.03055 | 0.489109 | 0.60798  | 515 | 253 |
| PRSS50    | -0.03052 | 0.489453 | 0.608297 | 515 | 498 |
| LOC285627 | -0.03052 | 0.489575 | 0.608388 | 515 | 66  |
| PIH1D1    | -0.03051 | 0.48959  | 0.608388 | 515 | 515 |
| HSFX2     | -0.03051 | 0.489689 | 0.60845  | 515 | 515 |
| ZMYND11   | -0.03051 | 0.4897   | 0.60845  | 515 | 515 |
| SPACA1    | -0.03049 | 0.490004 | 0.608627 | 515 | 22  |
| TMEM60    | -0.03048 | 0.490011 | 0.608627 | 515 | 515 |
| KIAA1217  | -0.03047 | 0.490169 | 0.60873  | 515 | 515 |
| OR7G2     | -0.03047 | 0.490271 | 0.608819 | 515 | 5   |
| POTEC     | -0.03045 | 0.490527 | 0.609028 | 515 | 16  |
| ACCN1     | -0.03045 | 0.490532 | 0.609028 | 515 | 467 |
| C17orf47  | -0.03044 | 0.490593 | 0.609066 | 515 | 502 |
| NCBP2     | -0.03043 | 0.490788 | 0.609232 | 515 | 515 |
| MLLT3     | -0.03043 | 0.490851 | 0.609232 | 515 | 515 |
| ZNF397OS  | -0.03042 | 0.490869 | 0.609232 | 515 | 515 |
| CSH2      | -0.03042 | 0.490879 | 0.609232 | 515 | 60  |
| TRIM67    | -0.03042 | 0.490995 | 0.609301 | 515 | 498 |
| BCYRN1    | -0.03038 | 0.491493 | 0.60988  | 515 | 13  |
| FAM163A   | -0.03038 | 0.491524 | 0.609881 | 515 | 489 |
| RSC1A1    | -0.03035 | 0.491891 | 0.610224 | 515 | 515 |
| SPRY4     | -0.03034 | 0.492069 | 0.610368 | 515 | 515 |
| ARMC9     | -0.03032 | 0.492343 | 0.610671 | 515 | 515 |
| TOP1      | -0.03032 | 0.492407 | 0.610711 | 515 | 515 |
| KIF14     | -0.03031 | 0.492512 | 0.610804 | 515 | 515 |
| MRPL49    | -0.03028 | 0.492908 | 0.611257 | 515 | 515 |
| PPIC      | -0.03026 | 0.49316  | 0.611532 | 515 | 515 |
| SEC63     | -0.03023 | 0.493688 | 0.612035 | 515 | 515 |
| ABCC2     | -0.03021 | 0.493887 | 0.612244 | 515 | 515 |
| UGT1A9    | -0.0302  | 0.494082 | 0.612371 | 515 | 266 |
| TTC38     | -0.03018 | 0.494306 | 0.612567 | 515 | 515 |
| LRP10     | -0.03018 | 0.494332 | 0.612567 | 515 | 515 |
| TIGD6     | -0.03018 | 0.494421 | 0.612639 | 515 | 515 |
| SLITRK6   | -0.03016 | 0.494625 | 0.612816 | 515 | 511 |
| FNDC4     | -0.03015 | 0.494728 | 0.612906 | 515 | 515 |
| TIAF1     | -0.03015 | 0.494777 | 0.612927 | 515 | 515 |
| ENDOU     | -0.03013 | 0.495014 | 0.613147 | 515 | 459 |
| CAGE1     | -0.0301  | 0.495444 | 0.613527 | 515 | 387 |

|           |          |          |          |     |     |
|-----------|----------|----------|----------|-----|-----|
| SMN2      | -0.0301  | 0.495518 | 0.613581 | 515 | 515 |
| VPS18     | -0.03009 | 0.495631 | 0.613683 | 515 | 515 |
| C21orf122 | -0.03006 | 0.496113 | 0.614205 | 515 | 515 |
| C9orf43   | -0.03005 | 0.496248 | 0.614285 | 515 | 512 |
| C11orf59  | -0.03005 | 0.496271 | 0.614285 | 515 | 515 |
| C2orf53   | -0.03004 | 0.496326 | 0.614315 | 515 | 6   |
| INTS9     | -0.03004 | 0.496389 | 0.614355 | 515 | 515 |
| ZCCHC16   | -0.03003 | 0.496533 | 0.614446 | 515 | 69  |
| EVC2      | -0.02998 | 0.497194 | 0.61495  | 515 | 515 |
| MGC15885  | -0.02998 | 0.497203 | 0.61495  | 515 | 54  |
| CSN2      | -0.02998 | 0.497203 | 0.61495  | 515 | 44  |
| EGFL7     | -0.02998 | 0.497292 | 0.614977 | 515 | 515 |
| SYT14L    | -0.02996 | 0.497458 | 0.615144 | 515 | 69  |
| KCNQ10T1  | -0.02996 | 0.497504 | 0.615163 | 515 | 515 |
| C20orf201 | -0.02988 | 0.498693 | 0.616557 | 515 | 336 |
| CCDC6     | -0.02987 | 0.498853 | 0.616631 | 515 | 515 |
| OSBPL5    | -0.02987 | 0.498876 | 0.616631 | 515 | 515 |
| TSEN15    | -0.02986 | 0.498922 | 0.616645 | 515 | 515 |
| MPRIP     | -0.02985 | 0.499148 | 0.616788 | 515 | 515 |
| C10orf137 | -0.02982 | 0.499494 | 0.617051 | 515 | 515 |
| PPP2R2A   | -0.02982 | 0.499559 | 0.617093 | 515 | 515 |
| C1orf135  | -0.02978 | 0.500075 | 0.617693 | 515 | 515 |
| DDX47     | -0.02977 | 0.500221 | 0.617835 | 515 | 515 |
| OTUD3     | -0.02976 | 0.500419 | 0.618003 | 515 | 515 |
| DMP1      | -0.02974 | 0.500713 | 0.618213 | 515 | 357 |
| RPL9      | -0.02969 | 0.501425 | 0.61894  | 515 | 515 |
| TNFRSF10E | -0.02968 | 0.501562 | 0.61907  | 515 | 515 |
| FAM55A    | -0.02967 | 0.501734 | 0.619206 | 515 | 127 |
| NET1      | -0.02965 | 0.502026 | 0.619451 | 515 | 515 |
| NUP85     | -0.02964 | 0.502057 | 0.619452 | 515 | 515 |
| C7orf28A  | -0.02962 | 0.502452 | 0.619854 | 515 | 515 |
| WTIP      | -0.02961 | 0.502487 | 0.619854 | 515 | 515 |
| ZNF24     | -0.0296  | 0.502684 | 0.620033 | 515 | 515 |
| NAP1L4    | -0.0296  | 0.502747 | 0.620074 | 515 | 515 |
| SAE1      | -0.02959 | 0.502848 | 0.62016  | 515 | 515 |
| ADAL      | -0.02955 | 0.503489 | 0.620835 | 515 | 515 |
| TFAP2A    | -0.02953 | 0.503647 | 0.620992 | 515 | 515 |
| KIAA0528  | -0.02953 | 0.503758 | 0.621028 | 515 | 515 |
| ADO       | -0.0295  | 0.504077 | 0.621292 | 515 | 515 |
| VSIG2     | -0.0295  | 0.504124 | 0.621312 | 515 | 512 |
| DCAF12L1  | -0.02937 | 0.505982 | 0.623096 | 515 | 167 |
| GMPPB     | -0.02937 | 0.506041 | 0.623096 | 515 | 515 |
| GATSL1    | -0.02936 | 0.506188 | 0.623188 | 515 | 512 |
| SOX1      | -0.02934 | 0.506479 | 0.623428 | 515 | 157 |
| PTH       | -0.02934 | 0.506496 | 0.623428 | 515 | 52  |
| OR13H1    | -0.02931 | 0.506857 | 0.623834 | 515 | 59  |
| DAB1      | -0.02926 | 0.507667 | 0.624677 | 515 | 303 |
| SEC14L5   | -0.02922 | 0.508276 | 0.625311 | 515 | 512 |
| RABAC1    | -0.02917 | 0.508993 | 0.625961 | 515 | 515 |
| SHE       | -0.02913 | 0.50947  | 0.626471 | 515 | 515 |
| GTF2IRD2  | -0.02912 | 0.509704 | 0.62672  | 515 | 515 |
| CLUAP1    | -0.02911 | 0.50976  | 0.626751 | 515 | 515 |
| OR52M1    | -0.02909 | 0.510082 | 0.626992 | 515 | 13  |
| NPM2      | -0.02909 | 0.510142 | 0.627027 | 515 | 512 |



|           |          |          |          |     |     |
|-----------|----------|----------|----------|-----|-----|
| HIST1H4I  | -0.02908 | 0.510231 | 0.627091 | 515 | 402 |
| SPAG11A   | -0.02904 | 0.510819 | 0.627706 | 515 | 22  |
| LRRC10B   | -0.02903 | 0.510964 | 0.627767 | 515 | 513 |
| RIPPLY1   | -0.02902 | 0.511088 | 0.627842 | 515 | 268 |
| C2CD4A    | -0.02899 | 0.511611 | 0.628369 | 515 | 515 |
| TBCK      | -0.02896 | 0.511914 | 0.628664 | 515 | 515 |
| TRDN      | -0.02896 | 0.51203  | 0.628768 | 515 | 182 |
| ZNF615    | -0.02893 | 0.512477 | 0.629279 | 515 | 515 |
| ZNF507    | -0.02892 | 0.512547 | 0.629325 | 515 | 515 |
| ATP1B2    | -0.02892 | 0.51258  | 0.629328 | 515 | 515 |
| CCDC96    | -0.02883 | 0.51387  | 0.630756 | 515 | 515 |
| FAM41AY1  | -0.02882 | 0.514081 | 0.630939 | 515 | 10  |
| LOC286467 | -0.02878 | 0.514629 | 0.631494 | 515 | 482 |
| GUSB      | -0.02872 | 0.515463 | 0.632401 | 515 | 515 |
| REG4      | -0.0287  | 0.515765 | 0.632732 | 515 | 382 |
| PRAMEF22  | -0.0287  | 0.515828 | 0.63277  | 515 | 10  |
| PDE9A     | -0.02867 | 0.516174 | 0.633039 | 515 | 515 |
| SLITRK1   | -0.02867 | 0.516272 | 0.633083 | 515 | 184 |
| LOC145474 | -0.02865 | 0.516557 | 0.633393 | 515 | 234 |
| SLC4A5    | -0.02864 | 0.516721 | 0.633477 | 515 | 515 |
| SAP30BP   | -0.02863 | 0.516846 | 0.633553 | 515 | 515 |
| AIF1L     | -0.02862 | 0.516981 | 0.63368  | 515 | 515 |
| FAM160B2  | -0.0286  | 0.517231 | 0.633948 | 515 | 515 |
| TGS1      | -0.02857 | 0.517693 | 0.63428  | 515 | 515 |
| SERPINA7  | -0.02856 | 0.517864 | 0.634412 | 515 | 92  |
| TTY9B     | -0.02849 | 0.518811 | 0.635261 | 515 | 24  |
| NHLRC2    | -0.02848 | 0.518972 | 0.635407 | 515 | 515 |
| CAMTA2    | -0.02848 | 0.519026 | 0.635407 | 515 | 515 |
| COQ10A    | -0.02846 | 0.519268 | 0.635554 | 515 | 515 |
| SYS1-DBND | -0.02845 | 0.519465 | 0.635711 | 515 | 470 |
| HSPC157   | -0.02844 | 0.519539 | 0.635762 | 515 | 515 |
| FAM89B    | -0.02841 | 0.519995 | 0.636186 | 515 | 515 |
| CANT1     | -0.02841 | 0.520034 | 0.636186 | 515 | 515 |
| PSMD12    | -0.02837 | 0.520678 | 0.63688  | 515 | 515 |
| APLP2     | -0.02836 | 0.520708 | 0.63688  | 515 | 515 |
| EXOSC8    | -0.02835 | 0.520899 | 0.63699  | 515 | 515 |
| MTNR1B    | -0.02835 | 0.520901 | 0.63699  | 515 | 56  |
| NT5C1A    | -0.02834 | 0.521037 | 0.637088 | 515 | 300 |
| OR5B3     | -0.02831 | 0.52148  | 0.637475 | 515 | 5   |
| PLA2G4F   | -0.02828 | 0.521877 | 0.637803 | 515 | 513 |
| KCTD2     | -0.02828 | 0.521922 | 0.63782  | 515 | 515 |
| MAK16     | -0.02827 | 0.522136 | 0.638043 | 515 | 515 |
| CHIA      | -0.02825 | 0.522359 | 0.638276 | 515 | 492 |
| SEPT9     | -0.02825 | 0.522398 | 0.638285 | 515 | 515 |
| MAP3K9    | -0.02824 | 0.522493 | 0.638361 | 515 | 515 |
| ERCC6L    | -0.02822 | 0.5228   | 0.638697 | 515 | 515 |
| TSPAN11   | -0.02821 | 0.523028 | 0.638873 | 515 | 515 |
| RAD9A     | -0.02819 | 0.523287 | 0.639136 | 515 | 515 |
| IL1F8     | -0.02817 | 0.523537 | 0.639324 | 515 | 128 |
| B3GNT4    | -0.02816 | 0.523754 | 0.639512 | 515 | 511 |
| FAM75A2   | -0.02813 | 0.524107 | 0.639863 | 515 | 84  |
| GCLM      | -0.02812 | 0.524299 | 0.64006  | 515 | 515 |
| PRKAB2    | -0.0281  | 0.524599 | 0.640348 | 515 | 515 |
| GTF2H5    | -0.02808 | 0.52487  | 0.640639 | 515 | 515 |

|           |          |          |          |     |     |
|-----------|----------|----------|----------|-----|-----|
| RPRD1B    | -0.02807 | 0.525081 | 0.640779 | 515 | 515 |
| GALNT13   | -0.02805 | 0.525278 | 0.640941 | 515 | 507 |
| LIPI      | -0.02801 | 0.525869 | 0.641544 | 515 | 174 |
| DGCR10    | -0.028   | 0.52606  | 0.641699 | 515 | 458 |
| PRSS53    | -0.02799 | 0.526161 | 0.641783 | 515 | 515 |
| SESN2     | -0.02799 | 0.526288 | 0.64186  | 515 | 515 |
| NAPEPLD   | -0.02798 | 0.526396 | 0.641887 | 515 | 515 |
| FEZF1     | -0.02798 | 0.526406 | 0.641887 | 515 | 462 |
| CACNG7    | -0.02798 | 0.526406 | 0.641887 | 515 | 107 |
| KIAA1429  | -0.02795 | 0.526877 | 0.642343 | 515 | 515 |
| PCDHGB4   | -0.02794 | 0.526942 | 0.642384 | 515 | 515 |
| CTAGE6    | -0.02792 | 0.527274 | 0.642652 | 515 | 505 |
| C19orf61  | -0.02792 | 0.527281 | 0.642652 | 515 | 515 |
| MTL5      | -0.02791 | 0.527438 | 0.642748 | 515 | 515 |
| CXorf61   | -0.0279  | 0.527498 | 0.642748 | 515 | 342 |
| F2RL3     | -0.02786 | 0.528149 | 0.643451 | 515 | 515 |
| C7orf59   | -0.02786 | 0.52818  | 0.643451 | 515 | 515 |
| NCRNA0011 | -0.02785 | 0.528249 | 0.643467 | 515 | 66  |
| COL4A5    | -0.02784 | 0.528404 | 0.643557 | 515 | 515 |
| FAM47B    | -0.02784 | 0.52842  | 0.643557 | 515 | 19  |
| NQO2      | -0.02783 | 0.528556 | 0.643674 | 515 | 515 |
| KHNYN     | -0.02783 | 0.528584 | 0.643674 | 515 | 515 |
| PRM1      | -0.02783 | 0.528612 | 0.643674 | 515 | 8   |
| C21orf129 | -0.02781 | 0.528854 | 0.643784 | 515 | 330 |
| WDR45     | -0.02781 | 0.528915 | 0.643784 | 515 | 515 |
| RSPH6A    | -0.02781 | 0.528928 | 0.643784 | 515 | 163 |
| AIP       | -0.0278  | 0.529007 | 0.643827 | 515 | 515 |
| ABHD14B   | -0.0278  | 0.529028 | 0.643827 | 515 | 515 |
| CREBZF    | -0.02778 | 0.52927  | 0.644004 | 515 | 515 |
| RNASE9    | -0.02778 | 0.529349 | 0.644061 | 515 | 5   |
| STXBP1    | -0.02776 | 0.529657 | 0.644356 | 515 | 515 |
| C3orf37   | -0.02775 | 0.529742 | 0.644422 | 515 | 515 |
| SALL3     | -0.02775 | 0.529803 | 0.644456 | 515 | 247 |
| FRMD1     | -0.0277  | 0.53058  | 0.645322 | 515 | 260 |
| ZNF77     | -0.02769 | 0.530709 | 0.645441 | 515 | 515 |
| ZCCHC4    | -0.02768 | 0.530819 | 0.645534 | 515 | 515 |
| DNAJB12   | -0.02766 | 0.531086 | 0.645781 | 515 | 515 |
| LOC100128 | -0.02765 | 0.531201 | 0.645842 | 515 | 515 |
| SCN1B     | -0.02762 | 0.531763 | 0.646369 | 515 | 515 |
| ZNF90     | -0.02758 | 0.532379 | 0.646947 | 515 | 515 |
| MUC15     | -0.02757 | 0.532398 | 0.646947 | 515 | 511 |
| SPIRE1    | -0.02757 | 0.532401 | 0.646947 | 515 | 515 |
| SHISA9    | -0.02755 | 0.532682 | 0.647132 | 515 | 375 |
| SLC6A11   | -0.02754 | 0.532842 | 0.647246 | 515 | 323 |
| AMOTL2    | -0.02754 | 0.532958 | 0.647349 | 515 | 515 |
| OPTC      | -0.02752 | 0.533164 | 0.647559 | 515 | 43  |
| WEE2      | -0.02751 | 0.533401 | 0.64768  | 515 | 376 |
| SYT4      | -0.0275  | 0.533462 | 0.647686 | 515 | 315 |
| LEPREL2   | -0.0275  | 0.533508 | 0.647686 | 515 | 515 |
| ZWILCH    | -0.0275  | 0.533528 | 0.647686 | 515 | 515 |
| CRCT1     | -0.02749 | 0.533671 | 0.647821 | 515 | 117 |
| TIMM8A    | -0.02748 | 0.533788 | 0.647924 | 515 | 515 |
| KDM3B     | -0.02744 | 0.534386 | 0.648531 | 515 | 515 |
| C19orf6   | -0.02742 | 0.534661 | 0.648784 | 515 | 515 |

|           |          |          |          |     |     |
|-----------|----------|----------|----------|-----|-----|
| LY6G6E    | -0.02742 | 0.534691 | 0.648784 | 515 | 48  |
| RPL31P11  | -0.02742 | 0.534736 | 0.648792 | 515 | 511 |
| C6orf221  | -0.02742 | 0.534763 | 0.648792 | 515 | 64  |
| ELOVL2    | -0.02741 | 0.534888 | 0.648886 | 515 | 513 |
| F2RL1     | -0.02741 | 0.534905 | 0.648886 | 515 | 515 |
| NEK2      | -0.02739 | 0.535063 | 0.649038 | 515 | 515 |
| BIRC6     | -0.02735 | 0.535732 | 0.64977  | 515 | 515 |
| VENTXP1   | -0.02731 | 0.536376 | 0.650473 | 515 | 23  |
| C17orf74  | -0.0273  | 0.536425 | 0.650492 | 515 | 118 |
| HSPH1     | -0.0273  | 0.536527 | 0.650577 | 515 | 515 |
| SEMA3E    | -0.02729 | 0.536701 | 0.650747 | 515 | 511 |
| CDH26     | -0.02728 | 0.536824 | 0.650858 | 515 | 514 |
| KLF16     | -0.02725 | 0.537158 | 0.651105 | 515 | 515 |
| GAB2      | -0.02723 | 0.537452 | 0.651382 | 515 | 515 |
| CCDC92    | -0.02721 | 0.537796 | 0.651719 | 515 | 515 |
| UBL3      | -0.0272  | 0.537945 | 0.651822 | 515 | 515 |
| CDC25A    | -0.02717 | 0.538451 | 0.652139 | 515 | 515 |
| SLC4A1AP  | -0.02717 | 0.538468 | 0.652139 | 515 | 515 |
| PRDX4     | -0.02716 | 0.538555 | 0.652166 | 515 | 515 |
| UROS      | -0.02715 | 0.538654 | 0.652213 | 515 | 515 |
| WSCD1     | -0.02715 | 0.53866  | 0.652213 | 515 | 515 |
| OR5V1     | -0.02715 | 0.53875  | 0.652283 | 515 | 11  |
| ZCCHC2    | -0.02712 | 0.539187 | 0.652733 | 515 | 515 |
| PRY2      | -0.02712 | 0.539228 | 0.652743 | 515 | 66  |
| HIST1H3F  | -0.0271  | 0.539433 | 0.652952 | 515 | 208 |
| ANAPC2    | -0.0271  | 0.539512 | 0.653008 | 515 | 515 |
| C7orf28B  | -0.02709 | 0.539583 | 0.653053 | 515 | 515 |
| FBF1      | -0.02709 | 0.539617 | 0.653055 | 515 | 515 |
| SLC27A5   | -0.02708 | 0.539727 | 0.65311  | 515 | 515 |
| HES7      | -0.02707 | 0.539888 | 0.653264 | 515 | 415 |
| C14orf126 | -0.02706 | 0.540018 | 0.65333  | 515 | 515 |
| HNF4A     | -0.02705 | 0.540147 | 0.65338  | 515 | 436 |
| TPRKB     | -0.02704 | 0.540386 | 0.653573 | 515 | 515 |
| CHRD      | -0.02704 | 0.540404 | 0.653573 | 515 | 515 |
| ASB8      | -0.02703 | 0.540589 | 0.653718 | 515 | 515 |
| ZNF606    | -0.02701 | 0.540782 | 0.653911 | 515 | 515 |
| POTEA     | -0.02701 | 0.540827 | 0.653926 | 515 | 6   |
| TRIM41    | -0.02697 | 0.541364 | 0.654457 | 515 | 515 |
| UNC93A    | -0.02695 | 0.54175  | 0.654883 | 515 | 279 |
| NUP155    | -0.02694 | 0.541914 | 0.655002 | 515 | 515 |
| MRAP      | -0.02692 | 0.542185 | 0.655251 | 515 | 111 |
| VKORC1L1  | -0.02692 | 0.542223 | 0.655257 | 515 | 515 |
| RPS10     | -0.02691 | 0.542291 | 0.655299 | 515 | 515 |
| TRIM62    | -0.02688 | 0.542812 | 0.65585  | 515 | 515 |
| MRPL1     | -0.02684 | 0.543315 | 0.656379 | 515 | 515 |
| HMX3      | -0.02684 | 0.543433 | 0.656481 | 515 | 38  |
| TRIML1    | -0.02683 | 0.543495 | 0.656514 | 515 | 52  |
| GLIPR1L1  | -0.02679 | 0.54407  | 0.657052 | 515 | 254 |
| TSPAN15   | -0.02679 | 0.544183 | 0.657109 | 515 | 515 |
| SMS       | -0.02678 | 0.544231 | 0.657127 | 515 | 515 |
| IQCF2     | -0.02675 | 0.544679 | 0.65755  | 515 | 8   |
| KRTAP4-7  | -0.02675 | 0.544757 | 0.657604 | 515 | 20  |
| THAP8     | -0.02673 | 0.545042 | 0.657869 | 515 | 515 |
| XAGE2     | -0.02669 | 0.545586 | 0.658326 | 515 | 337 |

|           |          |          |          |     |     |
|-----------|----------|----------|----------|-----|-----|
| CHCHD7    | -0.02668 | 0.545717 | 0.658343 | 515 | 515 |
| LHX4      | -0.02668 | 0.545772 | 0.658343 | 515 | 504 |
| IBSP      | -0.02668 | 0.545774 | 0.658343 | 515 | 481 |
| OBSCN     | -0.02667 | 0.545851 | 0.658368 | 515 | 515 |
| GABRA2    | -0.02665 | 0.546289 | 0.658738 | 515 | 266 |
| PTX4      | -0.02664 | 0.546389 | 0.658818 | 515 | 243 |
| ASB4      | -0.02662 | 0.546753 | 0.659217 | 515 | 462 |
| DARS      | -0.02658 | 0.547208 | 0.659686 | 515 | 515 |
| LOC728723 | -0.02657 | 0.547471 | 0.659946 | 515 | 515 |
| KRTAP13-4 | -0.02657 | 0.547491 | 0.659946 | 515 | 9   |
| BARHL1    | -0.02651 | 0.548284 | 0.660665 | 515 | 61  |
| TECPR1    | -0.0265  | 0.548425 | 0.660785 | 515 | 515 |
| VWA2      | -0.0265  | 0.548545 | 0.660818 | 515 | 515 |
| TCEAL5    | -0.02649 | 0.548577 | 0.660818 | 515 | 511 |
| NDUFA2    | -0.02648 | 0.548748 | 0.660969 | 515 | 515 |
| NAALADL2  | -0.02648 | 0.548768 | 0.660969 | 515 | 515 |
| HSPA4L    | -0.02648 | 0.548837 | 0.661012 | 515 | 515 |
| RASEF     | -0.02647 | 0.548883 | 0.661028 | 515 | 515 |
| UGT1A7    | -0.02644 | 0.549469 | 0.661494 | 515 | 78  |
| ENPP1     | -0.02642 | 0.549729 | 0.661697 | 515 | 515 |
| OR2T6     | -0.02641 | 0.549803 | 0.661697 | 515 | 4   |
| SLC7A4    | -0.0264  | 0.549935 | 0.661742 | 515 | 501 |
| CCDC71    | -0.0264  | 0.54994  | 0.661742 | 515 | 515 |
| OR6B3     | -0.02634 | 0.550851 | 0.662679 | 515 | 14  |
| SNRPG     | -0.02632 | 0.551233 | 0.663019 | 515 | 515 |
| NANOS2    | -0.0263  | 0.551576 | 0.663352 | 515 | 74  |
| OR6C6     | -0.02629 | 0.551702 | 0.663463 | 515 | 4   |
| LYG2      | -0.02628 | 0.551829 | 0.663576 | 515 | 259 |
| SYT2      | -0.02627 | 0.551967 | 0.663662 | 515 | 515 |
| STX1A     | -0.02626 | 0.552091 | 0.663771 | 515 | 515 |
| BBS5      | -0.02624 | 0.552357 | 0.663971 | 515 | 515 |
| LOC339535 | -0.02622 | 0.552704 | 0.664349 | 515 | 451 |
| MBD3L2    | -0.0262  | 0.552956 | 0.664611 | 515 | 11  |
| NGDN      | -0.0262  | 0.553073 | 0.664633 | 515 | 515 |
| GPR144    | -0.02619 | 0.553191 | 0.664734 | 515 | 70  |
| FAM83D    | -0.02617 | 0.553553 | 0.665089 | 515 | 515 |
| TMPRSS4   | -0.02615 | 0.553837 | 0.665273 | 515 | 515 |
| FERMT1    | -0.02614 | 0.553913 | 0.665322 | 515 | 515 |
| CD99L2    | -0.02614 | 0.553972 | 0.665352 | 515 | 515 |
| CYP4Z2P   | -0.02613 | 0.554082 | 0.665445 | 515 | 383 |
| SLC36A4   | -0.02612 | 0.554255 | 0.665532 | 515 | 515 |
| UCK1      | -0.0261  | 0.55459  | 0.665774 | 515 | 515 |
| POLR2K    | -0.02607 | 0.555035 | 0.666228 | 515 | 515 |
| OCIAD2    | -0.02606 | 0.555133 | 0.666306 | 515 | 515 |
| WRN       | -0.02602 | 0.555821 | 0.666971 | 515 | 515 |
| HIST2H2AC | -0.026   | 0.556033 | 0.667146 | 515 | 512 |
| TMEM175   | -0.02599 | 0.556177 | 0.667278 | 515 | 515 |
| CARM1     | -0.02593 | 0.55706  | 0.668055 | 515 | 515 |
| LOC253724 | -0.02593 | 0.557073 | 0.668055 | 515 | 514 |
| RNF39     | -0.02591 | 0.557389 | 0.668372 | 515 | 515 |
| PATE3     | -0.0259  | 0.557632 | 0.668583 | 515 | 46  |
| SLC26A3   | -0.02588 | 0.557957 | 0.668853 | 515 | 110 |
| DKFZP434K | -0.02587 | 0.558022 | 0.668891 | 515 | 110 |
| MAN1B1    | -0.02587 | 0.558084 | 0.668925 | 515 | 515 |

|           |          |          |          |     |     |
|-----------|----------|----------|----------|-----|-----|
| RYK       | -0.02586 | 0.558172 | 0.66899  | 515 | 515 |
| TAS2R7    | -0.02586 | 0.558246 | 0.669039 | 515 | 11  |
| WNK3      | -0.02585 | 0.558401 | 0.669154 | 515 | 508 |
| EPC2      | -0.02585 | 0.558413 | 0.669154 | 515 | 515 |
| CYP8B1    | -0.02584 | 0.558443 | 0.669154 | 515 | 460 |
| SNORA32   | -0.02583 | 0.558626 | 0.669334 | 515 | 13  |
| CIDEC     | -0.02579 | 0.559187 | 0.669845 | 515 | 403 |
| CD63      | -0.02578 | 0.559421 | 0.670084 | 515 | 515 |
| HSD3B1    | -0.02577 | 0.559489 | 0.670126 | 515 | 92  |
| TAF13     | -0.02576 | 0.559668 | 0.67026  | 515 | 515 |
| RPL5      | -0.02574 | 0.560032 | 0.670617 | 515 | 515 |
| FLII      | -0.02574 | 0.560033 | 0.670617 | 515 | 515 |
| SLC26A8   | -0.02573 | 0.560103 | 0.67062  | 515 | 477 |
| FKBP3     | -0.02573 | 0.560103 | 0.67062  | 515 | 515 |
| C8orf71   | -0.02573 | 0.560238 | 0.670694 | 515 | 22  |
| SLBP      | -0.02572 | 0.560265 | 0.670694 | 515 | 515 |
| DUSP9     | -0.02571 | 0.560507 | 0.670903 | 515 | 493 |
| DDX21     | -0.02569 | 0.560708 | 0.671076 | 515 | 515 |
| FTO       | -0.02567 | 0.561119 | 0.671414 | 515 | 515 |
| WRB       | -0.0256  | 0.562216 | 0.672547 | 515 | 515 |
| PLCH1     | -0.02557 | 0.562574 | 0.672894 | 515 | 515 |
| WDR86     | -0.02556 | 0.562693 | 0.672955 | 515 | 514 |
| UBR5      | -0.02556 | 0.562731 | 0.67296  | 515 | 515 |
| KPNA7     | -0.02555 | 0.562903 | 0.673068 | 515 | 511 |
| USP29     | -0.02553 | 0.563172 | 0.673327 | 515 | 14  |
| GLYATL3   | -0.02553 | 0.563257 | 0.673389 | 515 | 107 |
| ANXA10    | -0.02552 | 0.563336 | 0.673442 | 515 | 357 |
| NEIL3     | -0.02551 | 0.563498 | 0.673596 | 515 | 515 |
| RRP7B     | -0.02551 | 0.563584 | 0.673629 | 515 | 515 |
| LOC349114 | -0.0255  | 0.563681 | 0.673654 | 515 | 515 |
| CRYZ      | -0.02548 | 0.563973 | 0.673922 | 515 | 515 |
| AKIRIN1   | -0.02548 | 0.564062 | 0.673988 | 515 | 515 |
| SHH       | -0.02547 | 0.564099 | 0.673992 | 515 | 493 |
| TOX4      | -0.02546 | 0.564298 | 0.674155 | 515 | 515 |
| PRR7      | -0.02543 | 0.564792 | 0.674619 | 515 | 514 |
| CS        | -0.02541 | 0.565009 | 0.674837 | 515 | 515 |
| ST70T3    | -0.02538 | 0.565479 | 0.675255 | 515 | 476 |
| BCL6      | -0.02536 | 0.565809 | 0.675469 | 515 | 515 |
| OR2C3     | -0.02534 | 0.56621  | 0.675747 | 515 | 75  |
| PDILT     | -0.02532 | 0.566418 | 0.675914 | 515 | 19  |
| EGLN2     | -0.02531 | 0.566669 | 0.676082 | 515 | 515 |
| SPAG5     | -0.0253  | 0.566728 | 0.676082 | 515 | 515 |
| VN1R1     | -0.0253  | 0.566767 | 0.676088 | 515 | 514 |
| C2orf61   | -0.02529 | 0.566852 | 0.67615  | 515 | 319 |
| GTF2E2    | -0.02526 | 0.567406 | 0.67673  | 515 | 515 |
| YWHAZ     | -0.02523 | 0.567748 | 0.676976 | 515 | 515 |
| TRPM3     | -0.02523 | 0.567879 | 0.677092 | 515 | 350 |
| GTF2F1    | -0.02518 | 0.568533 | 0.677588 | 515 | 515 |
| SNORA42   | -0.02518 | 0.568597 | 0.677625 | 515 | 13  |
| MYOD1     | -0.02517 | 0.568775 | 0.677745 | 515 | 45  |
| TFIP11    | -0.02517 | 0.5688   | 0.677745 | 515 | 515 |
| SASS6     | -0.02517 | 0.5688   | 0.677745 | 515 | 515 |
| FRMD7     | -0.02516 | 0.568914 | 0.677806 | 515 | 176 |
| GCFC1     | -0.02516 | 0.568971 | 0.677806 | 515 | 515 |

|           |          |          |          |     |     |
|-----------|----------|----------|----------|-----|-----|
| FRMD8     | -0.02515 | 0.568997 | 0.677806 | 515 | 515 |
| NPFFR2    | -0.02512 | 0.569571 | 0.678285 | 515 | 346 |
| KEAP1     | -0.02511 | 0.569593 | 0.678285 | 515 | 515 |
| C9orf93   | -0.02511 | 0.569689 | 0.67836  | 515 | 515 |
| SNORA13   | -0.0251  | 0.569776 | 0.678422 | 515 | 5   |
| SMC1B     | -0.0251  | 0.569852 | 0.678473 | 515 | 478 |
| RPS25     | -0.02508 | 0.570147 | 0.678784 | 515 | 515 |
| ENPP5     | -0.02507 | 0.570215 | 0.678824 | 515 | 515 |
| C1orf113  | -0.02505 | 0.570517 | 0.679144 | 515 | 515 |
| WDR70     | -0.02505 | 0.57065  | 0.679192 | 515 | 515 |
| WFIKKN2   | -0.02505 | 0.57066  | 0.679192 | 515 | 441 |
| ANKRD13D  | -0.02504 | 0.570802 | 0.679286 | 515 | 515 |
| SNORA5B   | -0.02504 | 0.570807 | 0.679286 | 515 | 25  |
| SMC1A     | -0.02502 | 0.570988 | 0.67945  | 515 | 515 |
| MIP       | -0.02502 | 0.571012 | 0.67945  | 515 | 364 |
| SENP2     | -0.02501 | 0.571277 | 0.679683 | 515 | 515 |
| NCRNA0005 | -0.02497 | 0.571755 | 0.680212 | 515 | 49  |
| BTF3L4    | -0.02497 | 0.571848 | 0.680259 | 515 | 515 |
| ANKRD23   | -0.02497 | 0.571882 | 0.680259 | 515 | 515 |
| SPTBN5    | -0.02497 | 0.571897 | 0.680259 | 515 | 514 |
| TSFM      | -0.02491 | 0.572798 | 0.681128 | 515 | 515 |
| PRKAA2    | -0.02489 | 0.57298  | 0.68125  | 515 | 515 |
| PRSS22    | -0.02487 | 0.573363 | 0.681445 | 515 | 515 |
| SPANXN4   | -0.02487 | 0.573381 | 0.681445 | 515 | 6   |
| C11orf20  | -0.02485 | 0.573744 | 0.681642 | 515 | 453 |
| CLINT1    | -0.0248  | 0.574436 | 0.682188 | 515 | 515 |
| OR52D1    | -0.02478 | 0.574754 | 0.68252  | 515 | 76  |
| TMEM164   | -0.02473 | 0.575484 | 0.683265 | 515 | 515 |
| PCDHA6    | -0.02469 | 0.576141 | 0.683964 | 515 | 504 |
| SNHG4     | -0.02468 | 0.576244 | 0.684046 | 515 | 515 |
| PKHD1     | -0.02468 | 0.576286 | 0.684055 | 515 | 501 |
| GDI1      | -0.02467 | 0.576445 | 0.684203 | 515 | 515 |
| CYP26A1   | -0.02465 | 0.576827 | 0.684616 | 515 | 432 |
| EIF2AK3   | -0.02461 | 0.5774   | 0.685173 | 515 | 515 |
| SNORA49   | -0.02461 | 0.577434 | 0.685173 | 515 | 36  |
| EVX2      | -0.0246  | 0.577606 | 0.685296 | 515 | 26  |
| MOS       | -0.02456 | 0.57813  | 0.685837 | 515 | 19  |
| EXO1      | -0.02454 | 0.578474 | 0.686161 | 515 | 515 |
| CHUK      | -0.02453 | 0.57861  | 0.686161 | 515 | 515 |
| FLJ42289  | -0.02453 | 0.578611 | 0.686161 | 515 | 514 |
| C6orf146  | -0.02453 | 0.578674 | 0.686161 | 515 | 40  |
| LOC728190 | -0.02453 | 0.578684 | 0.686161 | 515 | 515 |
| LANCL3    | -0.02452 | 0.578747 | 0.686161 | 515 | 495 |
| VN1R5     | -0.02451 | 0.578941 | 0.686351 | 515 | 171 |
| LOC100303 | -0.02447 | 0.579492 | 0.686922 | 515 | 515 |
| KCNA7     | -0.02443 | 0.580149 | 0.687541 | 515 | 350 |
| ZADH2     | -0.02441 | 0.580464 | 0.68787  | 515 | 515 |
| SNORA37   | -0.02441 | 0.580516 | 0.687892 | 515 | 22  |
| OR2T4     | -0.02438 | 0.580939 | 0.68827  | 515 | 12  |
| ASAH1     | -0.02434 | 0.581502 | 0.688733 | 515 | 515 |
| CAP2      | -0.02431 | 0.581974 | 0.689169 | 515 | 515 |
| IQCK      | -0.0243  | 0.582207 | 0.689323 | 515 | 515 |
| C1D       | -0.02429 | 0.582335 | 0.689393 | 515 | 515 |
| RXFP4     | -0.02426 | 0.582787 | 0.689838 | 515 | 340 |

|           |          |          |          |     |     |
|-----------|----------|----------|----------|-----|-----|
| EPHA4     | -0.02426 | 0.582814 | 0.689838 | 515 | 515 |
| KNG1      | -0.02425 | 0.582929 | 0.689933 | 515 | 253 |
| ZFAND2B   | -0.02422 | 0.583442 | 0.690458 | 515 | 515 |
| RPL13AP6  | -0.02419 | 0.583939 | 0.690924 | 515 | 514 |
| SPRY2     | -0.02418 | 0.584014 | 0.690971 | 515 | 515 |
| LGALS4    | -0.02413 | 0.584838 | 0.691741 | 515 | 497 |
| LONRF2    | -0.02412 | 0.584942 | 0.691812 | 515 | 514 |
| LOC150185 | -0.02411 | 0.585194 | 0.691999 | 515 | 37  |
| PRSS38    | -0.02408 | 0.58554  | 0.692326 | 515 | 47  |
| FAM195B   | -0.02405 | 0.586026 | 0.692791 | 515 | 515 |
| LPAR3     | -0.02403 | 0.586418 | 0.693078 | 515 | 505 |
| GEMIN7    | -0.02403 | 0.586419 | 0.693078 | 515 | 515 |
| H3F3C     | -0.02402 | 0.586476 | 0.693105 | 515 | 515 |
| LSM7      | -0.024   | 0.58686  | 0.693436 | 515 | 515 |
| HORMAD1   | -0.02398 | 0.587187 | 0.693781 | 515 | 438 |
| SEMG1     | -0.02397 | 0.587282 | 0.693835 | 515 | 72  |
| HLTF      | -0.02394 | 0.587801 | 0.694342 | 515 | 515 |
| PSPH      | -0.02392 | 0.588147 | 0.694628 | 515 | 515 |
| XRCC3     | -0.0239  | 0.588401 | 0.694804 | 515 | 515 |
| HS3ST6    | -0.02387 | 0.588824 | 0.695222 | 515 | 415 |
| RNF133    | -0.02386 | 0.588969 | 0.695353 | 515 | 483 |
| UGT1A8    | -0.02383 | 0.589444 | 0.695848 | 515 | 123 |
| PCDH19    | -0.0238  | 0.589904 | 0.696086 | 515 | 512 |
| POLR3C    | -0.02376 | 0.590594 | 0.696689 | 515 | 515 |
| PCDHA4    | -0.02376 | 0.590624 | 0.696689 | 515 | 508 |
| SPINK5    | -0.02374 | 0.590863 | 0.69693  | 515 | 513 |
| KLHL8     | -0.02374 | 0.590953 | 0.696954 | 515 | 515 |
| STAC2     | -0.02369 | 0.591696 | 0.697686 | 515 | 500 |
| OR2Z1     | -0.02368 | 0.591824 | 0.697737 | 515 | 13  |
| FAHD2B    | -0.02366 | 0.59209  | 0.697984 | 515 | 515 |
| RSPH1     | -0.02366 | 0.592141 | 0.697984 | 515 | 513 |
| DLGAP4    | -0.02366 | 0.592181 | 0.69799  | 515 | 515 |
| AGK       | -0.02365 | 0.592371 | 0.69809  | 515 | 515 |
| CEL       | -0.02364 | 0.592551 | 0.698115 | 515 | 511 |
| FUNDC2P2  | -0.02363 | 0.592567 | 0.698115 | 515 | 484 |
| ITPR3     | -0.02362 | 0.592739 | 0.698195 | 515 | 515 |
| THOC3     | -0.02361 | 0.592974 | 0.69843  | 515 | 515 |
| LOC36003C | -0.02358 | 0.59343  | 0.698926 | 515 | 20  |
| KIR3DP1   | -0.02357 | 0.593607 | 0.699011 | 515 | 50  |
| C19orf10  | -0.02356 | 0.593735 | 0.69908  | 515 | 515 |
| H1FX      | -0.02352 | 0.594358 | 0.699667 | 515 | 515 |
| GUSBL2    | -0.02352 | 0.594374 | 0.699667 | 515 | 515 |
| CXorf51   | -0.02347 | 0.595122 | 0.700348 | 515 | 21  |
| PDE7B     | -0.02345 | 0.595412 | 0.700641 | 515 | 515 |
| BHMT2     | -0.02342 | 0.595912 | 0.701147 | 515 | 514 |
| ENGASE    | -0.02338 | 0.596493 | 0.701521 | 515 | 515 |
| MTIF3     | -0.02338 | 0.59651  | 0.701521 | 515 | 515 |
| ATP6AP1L  | -0.02337 | 0.596751 | 0.701639 | 515 | 515 |
| LOC100129 | -0.02335 | 0.596958 | 0.701799 | 515 | 515 |
| MRPL33    | -0.02333 | 0.59734  | 0.702166 | 515 | 515 |
| PYY2      | -0.02332 | 0.597426 | 0.702226 | 515 | 470 |
| CDC42BPA  | -0.02332 | 0.597527 | 0.702262 | 515 | 515 |
| FAM107B   | -0.02331 | 0.59765  | 0.702366 | 515 | 515 |
| KIFC1     | -0.02327 | 0.598307 | 0.702931 | 515 | 515 |

|           |          |          |          |     |     |
|-----------|----------|----------|----------|-----|-----|
| HIST1H2AE | -0.02326 | 0.598471 | 0.703022 | 515 | 494 |
| C3orf49   | -0.02326 | 0.598491 | 0.703022 | 515 | 216 |
| TRAPPC5   | -0.02325 | 0.59857  | 0.703075 | 515 | 515 |
| NCRNA0011 | -0.02324 | 0.598744 | 0.703221 | 515 | 94  |
| SLC25A31  | -0.02324 | 0.598765 | 0.703221 | 515 | 89  |
| C15orf50  | -0.02323 | 0.598874 | 0.703267 | 515 | 291 |
| SLC1A6    | -0.02322 | 0.599033 | 0.703411 | 515 | 207 |
| NUAK2     | -0.0232  | 0.599365 | 0.703719 | 515 | 515 |
| NEUROD2   | -0.0232  | 0.599415 | 0.703736 | 515 | 173 |
| TAS2R14   | -0.02319 | 0.599576 | 0.703884 | 515 | 505 |
| DEFB119   | -0.02318 | 0.599762 | 0.703983 | 515 | 10  |
| S100A1    | -0.02317 | 0.599802 | 0.703983 | 515 | 515 |
| TTY7      | -0.02315 | 0.600206 | 0.704395 | 515 | 8   |
| LOC407835 | -0.02314 | 0.600258 | 0.704395 | 515 | 515 |
| PRAMEF4   | -0.02314 | 0.600392 | 0.704511 | 515 | 26  |
| APEH      | -0.02311 | 0.600786 | 0.704776 | 515 | 515 |
| CHEK1     | -0.02309 | 0.601095 | 0.705088 | 515 | 515 |
| HSPC072   | -0.02308 | 0.601349 | 0.705303 | 515 | 240 |
| SP2       | -0.02307 | 0.601493 | 0.70543  | 515 | 515 |
| TMEM180   | -0.02296 | 0.603192 | 0.707021 | 515 | 515 |
| SLC5A11   | -0.02296 | 0.603238 | 0.707021 | 515 | 383 |
| CYCS      | -0.02296 | 0.603239 | 0.707021 | 515 | 515 |
| MKNK2     | -0.02295 | 0.603322 | 0.707077 | 515 | 515 |
| HSPC159   | -0.02291 | 0.603899 | 0.707587 | 515 | 515 |
| SNORA29   | -0.02287 | 0.604515 | 0.708102 | 515 | 36  |
| CLEC16A   | -0.02287 | 0.60458  | 0.708137 | 515 | 515 |
| LOH12CR1  | -0.02286 | 0.604672 | 0.708165 | 515 | 515 |
| CNOT1     | -0.02286 | 0.604676 | 0.708165 | 515 | 515 |
| STX19     | -0.0228  | 0.605749 | 0.709174 | 515 | 514 |
| TBC1D3B   | -0.02279 | 0.605801 | 0.709192 | 515 | 515 |
| SCARNA7   | -0.02279 | 0.605917 | 0.709286 | 515 | 450 |
| ZNF676    | -0.02277 | 0.606168 | 0.709497 | 515 | 424 |
| LOC200030 | -0.02276 | 0.606306 | 0.709618 | 515 | 515 |
| SDHAP3    | -0.02274 | 0.606654 | 0.709941 | 515 | 515 |
| C2orf43   | -0.02273 | 0.606852 | 0.710131 | 515 | 515 |
| MGRN1     | -0.02272 | 0.606946 | 0.710158 | 515 | 515 |
| NAA35     | -0.0227  | 0.607323 | 0.710475 | 515 | 515 |
| SLITRK5   | -0.02268 | 0.607547 | 0.710653 | 515 | 500 |
| INO80C    | -0.02264 | 0.608258 | 0.711444 | 515 | 515 |
| NRSN1     | -0.02263 | 0.608449 | 0.711584 | 515 | 136 |
| UGT1A10   | -0.02262 | 0.608562 | 0.711675 | 515 | 200 |
| MGC2752   | -0.0226  | 0.608856 | 0.711939 | 515 | 515 |
| PIGW      | -0.02258 | 0.609123 | 0.712164 | 515 | 515 |
| METTL5    | -0.02258 | 0.609246 | 0.71223  | 515 | 515 |
| CAPN6     | -0.02257 | 0.609386 | 0.712304 | 515 | 500 |
| LOC441455 | -0.02256 | 0.609434 | 0.71231  | 515 | 513 |
| GNB1L     | -0.02256 | 0.6095   | 0.712313 | 515 | 515 |
| C16orf89  | -0.02254 | 0.609782 | 0.712593 | 515 | 515 |
| SLC24A5   | -0.02254 | 0.609811 | 0.712593 | 515 | 487 |
| POM121C   | -0.02252 | 0.610157 | 0.712872 | 515 | 515 |
| RPS18     | -0.0225  | 0.61043  | 0.713025 | 515 | 515 |
| OTOP1     | -0.0225  | 0.610486 | 0.713048 | 515 | 36  |
| TMX4      | -0.02249 | 0.61055  | 0.713053 | 515 | 515 |
| UROC1     | -0.02249 | 0.610562 | 0.713053 | 515 | 344 |



|           |          |          |          |     |     |
|-----------|----------|----------|----------|-----|-----|
| HNRNPCL1  | -0.02246 | 0.611041 | 0.713529 | 515 | 10  |
| RAX2      | -0.02246 | 0.611097 | 0.713553 | 515 | 43  |
| C21orf2   | -0.02245 | 0.611287 | 0.71365  | 515 | 515 |
| CFHR3     | -0.02241 | 0.611809 | 0.714177 | 515 | 490 |
| CRYGB     | -0.02241 | 0.611925 | 0.71427  | 515 | 13  |
| ZNF10     | -0.0224  | 0.612003 | 0.71432  | 515 | 515 |
| TMC1      | -0.02237 | 0.612456 | 0.714723 | 515 | 325 |
| ALG1L2    | -0.02236 | 0.612694 | 0.714959 | 515 | 357 |
| PRMT1     | -0.02235 | 0.612858 | 0.715094 | 515 | 515 |
| RNF152    | -0.02235 | 0.612882 | 0.715094 | 515 | 515 |
| FOLH1     | -0.02233 | 0.613229 | 0.715415 | 515 | 515 |
| CHGA      | -0.0223  | 0.613587 | 0.715708 | 515 | 385 |
| REX01     | -0.02229 | 0.613797 | 0.715828 | 515 | 515 |
| OR10J1    | -0.02225 | 0.61441  | 0.716459 | 515 | 5   |
| SPTBN1    | -0.02223 | 0.61472  | 0.716779 | 515 | 515 |
| GC        | -0.02222 | 0.614869 | 0.716911 | 515 | 98  |
| PDIA5     | -0.02221 | 0.614997 | 0.717019 | 515 | 515 |
| ZDHHC24   | -0.0222  | 0.61516  | 0.717111 | 515 | 515 |
| CPNE6     | -0.0222  | 0.615181 | 0.717111 | 515 | 215 |
| HINFP     | -0.02219 | 0.615371 | 0.717287 | 515 | 515 |
| EMX2      | -0.02217 | 0.615725 | 0.717615 | 515 | 187 |
| FAM47E    | -0.02216 | 0.61586  | 0.71769  | 515 | 514 |
| DCAF8L2   | -0.02215 | 0.616084 | 0.717908 | 515 | 107 |
| POLR2J4   | -0.02214 | 0.616181 | 0.71798  | 515 | 515 |
| KLHL7     | -0.02212 | 0.616467 | 0.71826  | 515 | 515 |
| TMEM98    | -0.02212 | 0.616493 | 0.71826  | 515 | 515 |
| C12orf76  | -0.02211 | 0.616664 | 0.718261 | 515 | 515 |
| FLJ43859  | -0.02211 | 0.616674 | 0.718261 | 515 | 12  |
| HS3ST5    | -0.02209 | 0.61701  | 0.718527 | 515 | 460 |
| AKD1      | -0.02208 | 0.617099 | 0.718588 | 515 | 515 |
| PLK1S1    | -0.02201 | 0.618232 | 0.71974  | 515 | 515 |
| ZNF443    | -0.02199 | 0.618537 | 0.720022 | 515 | 515 |
| TFAP2E    | -0.02198 | 0.618696 | 0.720112 | 515 | 515 |
| B3GNT8    | -0.02197 | 0.618808 | 0.72016  | 515 | 515 |
| USP17L2   | -0.02197 | 0.618809 | 0.72016  | 515 | 118 |
| CNPY3     | -0.02197 | 0.618849 | 0.720165 | 515 | 515 |
| KIAA1328  | -0.02195 | 0.61915  | 0.720474 | 515 | 515 |
| PTTG1IP   | -0.02194 | 0.619328 | 0.720638 | 515 | 515 |
| NFIB      | -0.02192 | 0.619711 | 0.721042 | 515 | 515 |
| PSMD7     | -0.02188 | 0.620391 | 0.72175  | 515 | 515 |
| ENTPD5    | -0.02183 | 0.621122 | 0.722474 | 515 | 515 |
| GOLGA1    | -0.02181 | 0.621481 | 0.7228   | 515 | 515 |
| NKX6-1    | -0.02178 | 0.621973 | 0.723253 | 515 | 349 |
| SNRPB2    | -0.02177 | 0.622127 | 0.72339  | 515 | 515 |
| KCNMB4    | -0.02176 | 0.622272 | 0.723516 | 515 | 515 |
| PRSS54    | -0.02174 | 0.622534 | 0.723737 | 515 | 35  |
| C16orf11  | -0.02173 | 0.622684 | 0.723869 | 515 | 103 |
| KLHL31    | -0.0217  | 0.62327  | 0.724382 | 515 | 513 |
| HIST1H3E  | -0.02169 | 0.623382 | 0.724427 | 515 | 510 |
| REPS1     | -0.02168 | 0.623543 | 0.724573 | 515 | 515 |
| HIST2H2BA | -0.02167 | 0.623748 | 0.724655 | 515 | 513 |
| BRCC3     | -0.02165 | 0.623955 | 0.724799 | 515 | 515 |
| HCN1      | -0.02162 | 0.624513 | 0.725289 | 515 | 380 |
| PSMD14    | -0.0216  | 0.624747 | 0.725465 | 515 | 515 |

|           |          |          |          |     |     |
|-----------|----------|----------|----------|-----|-----|
| LOC100144 | -0.02159 | 0.624938 | 0.725645 | 515 | 514 |
| RNF222    | -0.02157 | 0.625318 | 0.72596  | 515 | 399 |
| FAM199X   | -0.02156 | 0.625509 | 0.72609  | 515 | 515 |
| CYP3A5    | -0.02155 | 0.625539 | 0.72609  | 515 | 514 |
| LGALS8    | -0.02154 | 0.625716 | 0.726211 | 515 | 515 |
| KLF14     | -0.02153 | 0.625944 | 0.726308 | 515 | 374 |
| C10orf120 | -0.02153 | 0.625945 | 0.726308 | 515 | 14  |
| RNU11     | -0.02151 | 0.626242 | 0.726527 | 515 | 47  |
| GLOD5     | -0.02148 | 0.626678 | 0.726948 | 515 | 507 |
| TCP10     | -0.02147 | 0.626838 | 0.727049 | 515 | 34  |
| BRS3      | -0.02145 | 0.627147 | 0.727324 | 515 | 96  |
| EBF4      | -0.02145 | 0.627205 | 0.727348 | 515 | 515 |
| MEIG1     | -0.02144 | 0.627417 | 0.727552 | 515 | 449 |
| UGT2A3    | -0.02141 | 0.62783  | 0.727946 | 515 | 140 |
| PIGS      | -0.02141 | 0.627884 | 0.727967 | 515 | 515 |
| SLC25A2   | -0.0214  | 0.628065 | 0.728131 | 515 | 379 |
| SFN       | -0.02139 | 0.628233 | 0.728165 | 515 | 515 |
| TAS2R13   | -0.02139 | 0.628237 | 0.728165 | 515 | 228 |
| NUDT17    | -0.02138 | 0.628354 | 0.728216 | 515 | 515 |
| FAM176B   | -0.02135 | 0.628843 | 0.728571 | 515 | 515 |
| RPSAP9    | -0.02134 | 0.62893  | 0.72863  | 515 | 515 |
| RGPD6     | -0.02133 | 0.629172 | 0.728841 | 515 | 515 |
| SEPT2     | -0.02131 | 0.629502 | 0.729039 | 515 | 515 |
| LOC100134 | -0.0213  | 0.629686 | 0.729194 | 515 | 515 |
| EPS8      | -0.02129 | 0.629857 | 0.729323 | 515 | 515 |
| KDM2A     | -0.02126 | 0.630259 | 0.729704 | 515 | 515 |
| IGBP1     | -0.02125 | 0.630492 | 0.729889 | 515 | 515 |
| SLC9A1    | -0.02123 | 0.630695 | 0.730082 | 515 | 515 |
| PITPNA    | -0.02123 | 0.630739 | 0.730091 | 515 | 515 |
| HOXA10    | -0.02121 | 0.631014 | 0.730325 | 515 | 510 |
| RND2      | -0.0212  | 0.631249 | 0.730513 | 515 | 514 |
| FAM64A    | -0.02116 | 0.631838 | 0.730982 | 515 | 515 |
| NDUFA12   | -0.02116 | 0.631905 | 0.731017 | 515 | 515 |
| CLIC3     | -0.02114 | 0.632158 | 0.731213 | 515 | 514 |
| WDR61     | -0.02113 | 0.632341 | 0.73131  | 515 | 515 |
| RAD51C    | -0.02112 | 0.632551 | 0.731468 | 515 | 515 |
| GPR27     | -0.0211  | 0.632797 | 0.73171  | 515 | 429 |
| CLDN22    | -0.02107 | 0.633365 | 0.732275 | 515 | 4   |
| PDXK      | -0.02102 | 0.634086 | 0.732946 | 515 | 515 |
| KIAA0101  | -0.021   | 0.634485 | 0.733238 | 515 | 515 |
| LOC441666 | -0.02099 | 0.634625 | 0.733313 | 515 | 511 |
| ETAA1     | -0.02099 | 0.63466  | 0.733313 | 515 | 515 |
| C20orf72  | -0.02097 | 0.634949 | 0.733562 | 515 | 515 |
| CHRM2     | -0.02092 | 0.635791 | 0.734493 | 515 | 211 |
| SYNPR     | -0.02087 | 0.636543 | 0.735146 | 515 | 166 |
| ADH5      | -0.02086 | 0.636783 | 0.735256 | 515 | 515 |
| ENOSF1    | -0.02082 | 0.63733  | 0.735718 | 515 | 515 |
| RFPL4B    | -0.02081 | 0.637536 | 0.73587  | 515 | 187 |
| TMED8     | -0.02078 | 0.638086 | 0.736463 | 515 | 515 |
| SNORA12   | -0.02074 | 0.638657 | 0.737037 | 515 | 79  |
| RAB3GAP1  | -0.02069 | 0.639395 | 0.737803 | 515 | 515 |
| SYPL1     | -0.02063 | 0.640424 | 0.738794 | 515 | 515 |
| NPY5R     | -0.02061 | 0.64069  | 0.738999 | 515 | 286 |
| C17orf104 | -0.0206  | 0.6409   | 0.739198 | 515 | 515 |

|           |          |          |          |     |     |
|-----------|----------|----------|----------|-----|-----|
| EIF3F     | -0.02059 | 0.641079 | 0.739362 | 515 | 515 |
| PMCHL1    | -0.02059 | 0.641165 | 0.739419 | 515 | 18  |
| SUMO2     | -0.02058 | 0.641299 | 0.73953  | 515 | 515 |
| LOC339568 | -0.02055 | 0.641799 | 0.739937 | 515 | 6   |
| RHBDL2    | -0.02053 | 0.642112 | 0.740212 | 515 | 515 |
| ASNS      | -0.02049 | 0.642768 | 0.740797 | 515 | 515 |
| PROKR2    | -0.02048 | 0.642838 | 0.740835 | 515 | 73  |
| AEN       | -0.02047 | 0.643069 | 0.741026 | 515 | 515 |
| CDH12     | -0.02046 | 0.643152 | 0.741026 | 515 | 463 |
| RPL12     | -0.02044 | 0.643502 | 0.741301 | 515 | 515 |
| GRK4      | -0.02042 | 0.643769 | 0.741524 | 515 | 515 |
| FHIT      | -0.02039 | 0.644388 | 0.74198  | 515 | 515 |
| LOC157381 | -0.02038 | 0.644486 | 0.74205  | 515 | 459 |
| CWC27     | -0.02037 | 0.644596 | 0.742134 | 515 | 515 |
| NKRF      | -0.02036 | 0.644869 | 0.742405 | 515 | 515 |
| TWF1      | -0.02035 | 0.644972 | 0.742481 | 515 | 515 |
| TUBBP5    | -0.02034 | 0.645146 | 0.742596 | 515 | 510 |
| HIST1H2AJ | -0.02033 | 0.645265 | 0.742647 | 515 | 353 |
| APP       | -0.02031 | 0.645588 | 0.742902 | 515 | 515 |
| KRTAP20-4 | -0.02031 | 0.645598 | 0.742902 | 515 | 5   |
| RBM12     | -0.0203  | 0.645802 | 0.743094 | 515 | 515 |
| 4-Mar     | -0.02029 | 0.64601  | 0.743206 | 515 | 500 |
| DBNDD2    | -0.02028 | 0.646093 | 0.743221 | 515 | 515 |
| MKLN1     | -0.02028 | 0.646098 | 0.743221 | 515 | 515 |
| ALKBH1    | -0.02028 | 0.646171 | 0.743262 | 515 | 515 |
| NKIRAS1   | -0.02025 | 0.646667 | 0.743661 | 515 | 515 |
| SCNN1D    | -0.02022 | 0.647046 | 0.74392  | 515 | 514 |
| MYO9A     | -0.02022 | 0.647092 | 0.74392  | 515 | 515 |
| SIKE1     | -0.02022 | 0.647149 | 0.74392  | 515 | 515 |
| PROSC     | -0.02021 | 0.647181 | 0.74392  | 515 | 515 |
| FANK1     | -0.02021 | 0.647189 | 0.74392  | 515 | 514 |
| LINGO4    | -0.02021 | 0.647195 | 0.74392  | 515 | 497 |
| TLE1      | -0.02021 | 0.647227 | 0.74392  | 515 | 515 |
| VLDLR     | -0.02021 | 0.647319 | 0.743953 | 515 | 515 |
| IQGAP3    | -0.02021 | 0.64733  | 0.743953 | 515 | 515 |
| ANGEL2    | -0.02017 | 0.647872 | 0.74428  | 515 | 515 |
| ATP6V1G1  | -0.02017 | 0.647892 | 0.74428  | 515 | 515 |
| TRH       | -0.02017 | 0.647977 | 0.744311 | 515 | 365 |
| TUBA3C    | -0.02016 | 0.648151 | 0.744414 | 515 | 176 |
| LCE2D     | -0.02015 | 0.648177 | 0.744414 | 515 | 7   |
| C5orf35   | -0.02015 | 0.648195 | 0.744414 | 515 | 515 |
| PNMA5     | -0.02015 | 0.648228 | 0.744414 | 515 | 426 |
| PPAT      | -0.02015 | 0.648253 | 0.744414 | 515 | 515 |
| CENPO     | -0.02013 | 0.648499 | 0.744612 | 515 | 515 |
| ATP6VOC   | -0.02012 | 0.648748 | 0.744855 | 515 | 515 |
| RTL1      | -0.02011 | 0.648946 | 0.744996 | 515 | 156 |
| AKNAD1    | -0.0201  | 0.649033 | 0.745054 | 515 | 401 |
| FGD4      | -0.02008 | 0.649377 | 0.745277 | 515 | 515 |
| OR52R1    | -0.02003 | 0.650215 | 0.74611  | 515 | 11  |
| LHFPL5    | -0.02002 | 0.650399 | 0.746278 | 515 | 432 |
| HDHD2     | -0.02001 | 0.650498 | 0.74635  | 515 | 515 |
| PPARA     | -0.01998 | 0.650966 | 0.7468   | 515 | 515 |
| TGIF2     | -0.01994 | 0.651643 | 0.74745  | 515 | 515 |
| TMEM101   | -0.01994 | 0.651719 | 0.74745  | 515 | 515 |

|           |          |          |          |     |     |
|-----------|----------|----------|----------|-----|-----|
| ABAT      | -0.01993 | 0.651782 | 0.747479 | 515 | 515 |
| DMRT1     | -0.01993 | 0.6519   | 0.747572 | 515 | 246 |
| NARF      | -0.01991 | 0.652173 | 0.747809 | 515 | 515 |
| DNM1L     | -0.01991 | 0.652181 | 0.747809 | 515 | 515 |
| SET       | -0.0199  | 0.652339 | 0.747876 | 515 | 515 |
| CCDC144NL | -0.01988 | 0.652665 | 0.748148 | 515 | 242 |
| LHX5      | -0.01986 | 0.653011 | 0.748502 | 515 | 240 |
| TAS2R39   | -0.01984 | 0.653373 | 0.748831 | 515 | 14  |
| OCLM      | -0.01983 | 0.653448 | 0.748874 | 515 | 509 |
| KCNJ9     | -0.01981 | 0.653724 | 0.749141 | 515 | 212 |
| C14orf105 | -0.01981 | 0.653756 | 0.749141 | 515 | 334 |
| LOC100287 | -0.0198  | 0.653974 | 0.749349 | 515 | 513 |
| CDCA3     | -0.01979 | 0.654053 | 0.749396 | 515 | 515 |
| KIAA1370  | -0.01979 | 0.654171 | 0.749483 | 515 | 515 |
| MRPL18    | -0.01975 | 0.654705 | 0.749825 | 515 | 515 |
| SLMAP     | -0.01975 | 0.654802 | 0.749825 | 515 | 515 |
| POLG      | -0.01971 | 0.655445 | 0.750432 | 515 | 515 |
| CRISPLD1  | -0.0197  | 0.655512 | 0.750443 | 515 | 515 |
| PRR13     | -0.01966 | 0.656234 | 0.75107  | 515 | 515 |
| CNIH4     | -0.01966 | 0.656265 | 0.75107  | 515 | 515 |
| MICALL1   | -0.01965 | 0.656454 | 0.7512   | 515 | 515 |
| C19orf53  | -0.01964 | 0.656572 | 0.751248 | 515 | 515 |
| CEP290    | -0.01964 | 0.65663  | 0.751272 | 515 | 515 |
| WBSCR26   | -0.01961 | 0.656978 | 0.751585 | 515 | 506 |
| HTRA2     | -0.01957 | 0.657641 | 0.752049 | 515 | 515 |
| SBF1P1    | -0.01957 | 0.657647 | 0.752049 | 515 | 412 |
| MRE11A    | -0.01955 | 0.658042 | 0.752328 | 515 | 515 |
| TTPA      | -0.01954 | 0.65815  | 0.752337 | 515 | 341 |
| SUN3      | -0.01954 | 0.658201 | 0.752337 | 515 | 320 |
| DKFZP686I | -0.01951 | 0.658723 | 0.752848 | 515 | 515 |
| ABCC1     | -0.0195  | 0.658864 | 0.75288  | 515 | 515 |
| COPE      | -0.01949 | 0.658972 | 0.75296  | 515 | 515 |
| OLA1      | -0.01946 | 0.65949  | 0.753466 | 515 | 515 |
| ZNF594    | -0.01944 | 0.659778 | 0.753577 | 515 | 515 |
| KIAA1919  | -0.01944 | 0.65979  | 0.753577 | 515 | 515 |
| SNX16     | -0.01944 | 0.659814 | 0.753577 | 515 | 515 |
| C14orf178 | -0.01939 | 0.660671 | 0.7542   | 515 | 305 |
| KPNA1     | -0.01939 | 0.660681 | 0.7542   | 515 | 515 |
| GLRA4     | -0.01939 | 0.660718 | 0.7542   | 515 | 59  |
| TMEM50B   | -0.01939 | 0.660736 | 0.7542   | 515 | 515 |
| OR1E2     | -0.01937 | 0.661017 | 0.754477 | 515 | 7   |
| SART3     | -0.01936 | 0.661197 | 0.754511 | 515 | 515 |
| ELAVL2    | -0.01932 | 0.661823 | 0.755052 | 515 | 442 |
| C17orf98  | -0.01928 | 0.6625   | 0.75561  | 515 | 131 |
| TPPP      | -0.01927 | 0.662618 | 0.7557   | 515 | 515 |
| ZNF18     | -0.01923 | 0.663241 | 0.756325 | 515 | 515 |
| C20orf94  | -0.01922 | 0.663455 | 0.756483 | 515 | 515 |
| TNFRSF19  | -0.01921 | 0.663617 | 0.756624 | 515 | 515 |
| NARG2     | -0.01919 | 0.66393  | 0.756938 | 515 | 515 |
| PAR1      | -0.01917 | 0.664268 | 0.757232 | 515 | 315 |
| LPA       | -0.01917 | 0.664305 | 0.757232 | 515 | 166 |
| CUEDC1    | -0.01916 | 0.664513 | 0.757364 | 515 | 515 |
| MOBK1A    | -0.01915 | 0.664531 | 0.757364 | 515 | 515 |
| GUSBP1    | -0.01914 | 0.664847 | 0.757594 | 515 | 515 |

|           |          |          |          |     |     |
|-----------|----------|----------|----------|-----|-----|
| LRG1      | -0.01913 | 0.664956 | 0.757659 | 515 | 515 |
| CCNJL     | -0.01912 | 0.665031 | 0.757659 | 515 | 515 |
| EPO       | -0.01911 | 0.665194 | 0.75773  | 515 | 336 |
| SLC9A4    | -0.0191  | 0.665362 | 0.757824 | 515 | 256 |
| KBTBD4    | -0.01909 | 0.665604 | 0.758025 | 515 | 515 |
| SHROOM1   | -0.01908 | 0.665796 | 0.758157 | 515 | 515 |
| RAPH1     | -0.01906 | 0.666134 | 0.75837  | 515 | 515 |
| OR7E5P    | -0.01903 | 0.666541 | 0.758616 | 515 | 43  |
| NSMCE4A   | -0.01901 | 0.666944 | 0.758989 | 515 | 515 |
| GABRG1    | -0.019   | 0.667042 | 0.759057 | 515 | 168 |
| TOMM22    | -0.019   | 0.667115 | 0.759097 | 515 | 515 |
| C2orf63   | -0.01899 | 0.667256 | 0.759171 | 515 | 515 |
| RALGAPA1  | -0.01897 | 0.667624 | 0.759503 | 515 | 515 |
| TET2      | -0.01896 | 0.667666 | 0.759507 | 515 | 515 |
| PKLR      | -0.0189  | 0.668722 | 0.760622 | 515 | 248 |
| TRIML2    | -0.01888 | 0.669117 | 0.760924 | 515 | 153 |
| TXNDC2    | -0.01887 | 0.66929  | 0.761052 | 515 | 438 |
| TAS2R30   | -0.01886 | 0.669376 | 0.761107 | 515 | 134 |
| TAB3      | -0.01883 | 0.669935 | 0.761583 | 515 | 515 |
| LOC401387 | -0.01874 | 0.671393 | 0.762965 | 515 | 356 |
| C17orf82  | -0.01872 | 0.67177  | 0.763351 | 515 | 510 |
| LOC100129 | -0.01871 | 0.671841 | 0.763357 | 515 | 515 |
| MAPT      | -0.01871 | 0.671852 | 0.763357 | 515 | 515 |
| WSB1      | -0.01868 | 0.672354 | 0.763711 | 515 | 515 |
| KGFLP1    | -0.01867 | 0.672512 | 0.763847 | 515 | 270 |
| C8orf85   | -0.01866 | 0.672653 | 0.76392  | 515 | 504 |
| DHX32     | -0.01865 | 0.672774 | 0.764014 | 515 | 515 |
| LGALS9B   | -0.01865 | 0.672877 | 0.764087 | 515 | 339 |
| GOLGA8E   | -0.01864 | 0.67295  | 0.764127 | 515 | 48  |
| SMAP1     | -0.01864 | 0.673047 | 0.764194 | 515 | 515 |
| SRI       | -0.01863 | 0.67311  | 0.764221 | 515 | 515 |
| MBIP      | -0.01863 | 0.673148 | 0.764221 | 515 | 515 |
| HINT3     | -0.01861 | 0.673469 | 0.764499 | 515 | 515 |
| LOC348021 | -0.01857 | 0.674224 | 0.765112 | 515 | 19  |
| OR5C1     | -0.01855 | 0.674489 | 0.765264 | 515 | 54  |
| MST1R     | -0.01855 | 0.674516 | 0.765264 | 515 | 515 |
| RIBC2     | -0.01855 | 0.674564 | 0.765264 | 515 | 514 |
| TMEM61    | -0.01851 | 0.675081 | 0.765722 | 515 | 512 |
| C9orf71   | -0.01851 | 0.675083 | 0.765722 | 515 | 137 |
| C3orf67   | -0.01849 | 0.675498 | 0.765976 | 515 | 514 |
| FLJ43950  | -0.01847 | 0.675785 | 0.76608  | 515 | 91  |
| NDUFB2    | -0.01847 | 0.675795 | 0.76608  | 515 | 515 |
| RFPL1     | -0.01845 | 0.67618  | 0.766358 | 515 | 339 |
| FBLIM1    | -0.01844 | 0.676342 | 0.766455 | 515 | 515 |
| KCNQ4     | -0.01843 | 0.676554 | 0.766627 | 515 | 502 |
| ANAPC1    | -0.01841 | 0.6769   | 0.766913 | 515 | 515 |
| CALN1     | -0.0184  | 0.677015 | 0.766956 | 515 | 238 |
| ATRX      | -0.0184  | 0.677061 | 0.766961 | 515 | 515 |
| ISX       | -0.01839 | 0.677096 | 0.766961 | 515 | 204 |
| PTCH1     | -0.01838 | 0.677244 | 0.767085 | 515 | 515 |
| HCRT      | -0.01835 | 0.677745 | 0.767523 | 515 | 116 |
| SLC35A4   | -0.01834 | 0.677976 | 0.76774  | 515 | 515 |
| MED15     | -0.01832 | 0.67839  | 0.768166 | 515 | 515 |
| SGK223    | -0.01829 | 0.678879 | 0.768632 | 515 | 515 |

|           |          |          |          |     |     |
|-----------|----------|----------|----------|-----|-----|
| ZNF587    | -0.01828 | 0.679007 | 0.768734 | 515 | 515 |
| HEXIM1    | -0.01827 | 0.679102 | 0.768779 | 515 | 515 |
| DYRK1A    | -0.01826 | 0.679296 | 0.768913 | 515 | 515 |
| SLC38A11  | -0.01826 | 0.679319 | 0.768913 | 515 | 446 |
| FABP9     | -0.01825 | 0.679501 | 0.769008 | 515 | 9   |
| AURKA     | -0.01822 | 0.679927 | 0.769417 | 515 | 515 |
| SNORA2B   | -0.01822 | 0.67997  | 0.769417 | 515 | 11  |
| TULP4     | -0.01822 | 0.679996 | 0.769417 | 515 | 515 |
| DEFB125   | -0.01821 | 0.680114 | 0.769476 | 515 | 5   |
| VSTM2L    | -0.01818 | 0.680562 | 0.769927 | 515 | 515 |
| ZSCAN22   | -0.01817 | 0.680743 | 0.770045 | 515 | 515 |
| DNAJC7    | -0.01817 | 0.68085  | 0.770122 | 515 | 515 |
| AMN1      | -0.01815 | 0.681074 | 0.770332 | 515 | 515 |
| FAM149B1  | -0.01815 | 0.681186 | 0.770371 | 515 | 515 |
| CPN1      | -0.01814 | 0.681353 | 0.770517 | 515 | 100 |
| ING2      | -0.01807 | 0.682508 | 0.771561 | 515 | 515 |
| TH        | -0.01803 | 0.683062 | 0.7721   | 515 | 320 |
| ONECUT2   | -0.01802 | 0.683278 | 0.772213 | 515 | 499 |
| ANP32B    | -0.01802 | 0.683354 | 0.772255 | 515 | 515 |
| RAN       | -0.01801 | 0.683446 | 0.772269 | 515 | 515 |
| UQCRC2    | -0.01801 | 0.683508 | 0.772269 | 515 | 515 |
| EXTL3     | -0.01801 | 0.683521 | 0.772269 | 515 | 515 |
| ACTL9     | -0.018   | 0.683652 | 0.772374 | 515 | 45  |
| LOC284232 | -0.01799 | 0.683784 | 0.772435 | 515 | 515 |
| C1orf123  | -0.01798 | 0.683958 | 0.772588 | 515 | 515 |
| HIST2H3D  | -0.01797 | 0.684131 | 0.772669 | 515 | 428 |
| KRTAP10-7 | -0.01796 | 0.684255 | 0.772749 | 515 | 11  |
| GPR61     | -0.01796 | 0.684348 | 0.772786 | 515 | 298 |
| QRICH1    | -0.01794 | 0.684613 | 0.773023 | 515 | 515 |
| CYB5RL    | -0.01793 | 0.684862 | 0.77326  | 515 | 515 |
| HIST1H2AC | -0.01791 | 0.685194 | 0.773548 | 515 | 307 |
| AMT       | -0.0179  | 0.685267 | 0.773586 | 515 | 515 |
| NDUFAF4   | -0.01789 | 0.685522 | 0.77379  | 515 | 515 |
| GRXCR1    | -0.01788 | 0.685631 | 0.773866 | 515 | 13  |
| SARNP     | -0.01783 | 0.686467 | 0.774634 | 515 | 515 |
| FITM2     | -0.01779 | 0.687102 | 0.775292 | 515 | 515 |
| ILKAP     | -0.01778 | 0.687208 | 0.77534  | 515 | 515 |
| CST9L     | -0.01766 | 0.689263 | 0.777307 | 515 | 6   |
| C7orf45   | -0.01764 | 0.689608 | 0.777609 | 515 | 136 |
| SELS      | -0.01763 | 0.689828 | 0.777734 | 515 | 515 |
| C9orf79   | -0.0176  | 0.690275 | 0.778141 | 515 | 190 |
| UBE2S     | -0.01759 | 0.690498 | 0.778348 | 515 | 515 |
| ZNF239    | -0.01758 | 0.690608 | 0.778385 | 515 | 515 |
| RHBG      | -0.01757 | 0.6908   | 0.778557 | 515 | 488 |
| PQLC1     | -0.01755 | 0.691153 | 0.778911 | 515 | 515 |
| TRPM6     | -0.01753 | 0.691425 | 0.779126 | 515 | 498 |
| SFRP1     | -0.01753 | 0.691461 | 0.779126 | 515 | 513 |
| NXNL1     | -0.01752 | 0.69166  | 0.779299 | 515 | 49  |
| ADH1C     | -0.01751 | 0.691869 | 0.779405 | 515 | 506 |
| HOMEZ     | -0.0175  | 0.69193  | 0.779405 | 515 | 515 |
| WWP1      | -0.01744 | 0.692884 | 0.780246 | 515 | 515 |
| GPR119    | -0.01743 | 0.693092 | 0.780363 | 515 | 37  |
| DYNLT3    | -0.01741 | 0.693502 | 0.780721 | 515 | 515 |
| CACNG1    | -0.01735 | 0.694384 | 0.781582 | 515 | 276 |

|           |          |          |          |     |     |
|-----------|----------|----------|----------|-----|-----|
| PPIF      | -0.01732 | 0.694978 | 0.782075 | 515 | 515 |
| RDX       | -0.01731 | 0.69521  | 0.782278 | 515 | 515 |
| DDI2      | -0.01729 | 0.695485 | 0.782497 | 515 | 515 |
| POTEE     | -0.01728 | 0.695663 | 0.782626 | 515 | 507 |
| SLC17A2   | -0.01724 | 0.696247 | 0.783172 | 515 | 38  |
| HIST3H2BE | -0.01724 | 0.696338 | 0.783172 | 515 | 430 |
| PDSS2     | -0.01723 | 0.696484 | 0.783249 | 515 | 515 |
| GSTM2P1   | -0.01723 | 0.696491 | 0.783249 | 515 | 350 |
| GTF3C6    | -0.01722 | 0.696636 | 0.783294 | 515 | 515 |
| PPP1CA    | -0.01722 | 0.696649 | 0.783294 | 515 | 515 |
| MAP1S     | -0.01722 | 0.696693 | 0.783299 | 515 | 515 |
| SOSTDC1   | -0.0172  | 0.696937 | 0.783513 | 515 | 482 |
| SNORA51   | -0.0172  | 0.696961 | 0.783513 | 515 | 15  |
| LOC729668 | -0.01719 | 0.697134 | 0.783664 | 515 | 363 |
| GOLGA8DP  | -0.01718 | 0.697333 | 0.783759 | 515 | 205 |
| HIST2H4A  | -0.01718 | 0.697337 | 0.783759 | 515 | 515 |
| GGCX      | -0.01717 | 0.697507 | 0.783826 | 515 | 515 |
| FAM177B   | -0.01714 | 0.697966 | 0.784069 | 515 | 494 |
| TNRC6A    | -0.01713 | 0.698152 | 0.784146 | 515 | 515 |
| RPL36A    | -0.01711 | 0.698464 | 0.784453 | 515 | 515 |
| NEFM      | -0.0171  | 0.698588 | 0.784548 | 515 | 387 |
| SNAR-G1   | -0.01709 | 0.698759 | 0.784639 | 515 | 8   |
| CROCCL1   | -0.01709 | 0.698769 | 0.784639 | 515 | 515 |
| STIM2     | -0.01709 | 0.698827 | 0.784639 | 515 | 515 |
| SPANXC    | -0.01708 | 0.698914 | 0.784693 | 515 | 100 |
| FAM138D   | -0.01707 | 0.699099 | 0.784857 | 515 | 30  |
| C6orf10   | -0.01707 | 0.699142 | 0.784861 | 515 | 65  |
| IGFBPL1   | -0.01706 | 0.699265 | 0.784955 | 515 | 493 |
| ALS2CR4   | -0.01705 | 0.69954  | 0.785089 | 515 | 515 |
| ECHDC3    | -0.01705 | 0.699569 | 0.785089 | 515 | 515 |
| NCRNA0008 | -0.01704 | 0.699581 | 0.785089 | 515 | 515 |
| NXF1      | -0.01703 | 0.699841 | 0.785293 | 515 | 515 |
| KRTAP11-1 | -0.01701 | 0.700163 | 0.78561  | 515 | 11  |
| CERK      | -0.01695 | 0.701136 | 0.786349 | 515 | 515 |
| ITGB1     | -0.01694 | 0.701318 | 0.786509 | 515 | 515 |
| SFTA2     | -0.01694 | 0.701402 | 0.786558 | 515 | 514 |
| IK        | -0.01693 | 0.701466 | 0.786586 | 515 | 515 |
| CANX      | -0.01693 | 0.701574 | 0.786663 | 515 | 515 |
| PRL       | -0.01689 | 0.702159 | 0.787275 | 515 | 187 |
| MCM8      | -0.01688 | 0.702272 | 0.787357 | 515 | 515 |
| IPP       | -0.01688 | 0.70231  | 0.787357 | 515 | 515 |
| FEN1      | -0.01688 | 0.702388 | 0.7874   | 515 | 515 |
| HSD17B2   | -0.01687 | 0.702552 | 0.787494 | 515 | 504 |
| KATNB1    | -0.01685 | 0.702886 | 0.787788 | 515 | 515 |
| TAC01     | -0.01684 | 0.703081 | 0.787912 | 515 | 515 |
| KRTAP19-3 | -0.01681 | 0.703578 | 0.788247 | 515 | 5   |
| ABP1      | -0.0168  | 0.703732 | 0.788355 | 515 | 515 |
| PTPRA     | -0.0168  | 0.703754 | 0.788355 | 515 | 515 |
| ZNF28     | -0.01679 | 0.703902 | 0.788428 | 515 | 515 |
| ZNF556    | -0.01678 | 0.703937 | 0.788428 | 515 | 202 |
| CFHR1     | -0.01678 | 0.703983 | 0.788436 | 515 | 278 |
| CROCCL2   | -0.01678 | 0.704084 | 0.788504 | 515 | 515 |
| FLYWCH1   | -0.01675 | 0.704513 | 0.788808 | 515 | 515 |
| CLIP1     | -0.01671 | 0.705123 | 0.789359 | 515 | 515 |

|           |          |          |          |     |     |
|-----------|----------|----------|----------|-----|-----|
| TP53RK    | -0.0167  | 0.705312 | 0.78944  | 515 | 515 |
| TM4SF4    | -0.0167  | 0.705314 | 0.78944  | 515 | 483 |
| COMMD6    | -0.01669 | 0.70557  | 0.789673 | 515 | 515 |
| C11orf31  | -0.01669 | 0.705602 | 0.789673 | 515 | 515 |
| PRAMEF16  | -0.01663 | 0.706507 | 0.790509 | 515 | 30  |
| PPP1R3A   | -0.01662 | 0.706692 | 0.790673 | 515 | 46  |
| STL       | -0.01659 | 0.707246 | 0.791114 | 515 | 476 |
| COBRA1    | -0.01656 | 0.707655 | 0.791528 | 515 | 515 |
| SDCCAG1   | -0.01655 | 0.707849 | 0.791656 | 515 | 515 |
| IFNA7     | -0.01653 | 0.708164 | 0.791829 | 515 | 5   |
| TTC31     | -0.01649 | 0.708873 | 0.792507 | 515 | 515 |
| CLDN9     | -0.01648 | 0.709087 | 0.792566 | 515 | 514 |
| COL20A1   | -0.01648 | 0.7091   | 0.792566 | 515 | 116 |
| CYP3A43   | -0.01648 | 0.709138 | 0.792566 | 515 | 215 |
| C1orf50   | -0.01646 | 0.709346 | 0.792754 | 515 | 515 |
| MAPK8IP3  | -0.01644 | 0.709675 | 0.793007 | 515 | 515 |
| LZIC      | -0.01644 | 0.709797 | 0.793036 | 515 | 515 |
| PAPD7     | -0.01641 | 0.710168 | 0.793319 | 515 | 515 |
| PSG11     | -0.01641 | 0.710169 | 0.793319 | 515 | 21  |
| FNTA      | -0.01638 | 0.710699 | 0.793778 | 515 | 515 |
| NUDCD3    | -0.01638 | 0.710809 | 0.793856 | 515 | 515 |
| PSPN      | -0.01637 | 0.71094  | 0.793959 | 515 | 314 |
| MASTL     | -0.01634 | 0.711478 | 0.794427 | 515 | 515 |
| WDR87     | -0.0163  | 0.712054 | 0.794981 | 515 | 372 |
| PLEKHA9   | -0.01625 | 0.712938 | 0.795572 | 515 | 515 |
| DMPK      | -0.01625 | 0.712942 | 0.795572 | 515 | 515 |
| LOC100128 | -0.01624 | 0.713144 | 0.795631 | 515 | 170 |
| GPR142    | -0.01622 | 0.713449 | 0.795827 | 515 | 252 |
| TSN       | -0.01621 | 0.713602 | 0.795934 | 515 | 515 |
| GLG1      | -0.01621 | 0.713625 | 0.795934 | 515 | 515 |
| TSPY1     | -0.01621 | 0.713665 | 0.795934 | 515 | 15  |
| PDRG1     | -0.01618 | 0.714133 | 0.796316 | 515 | 515 |
| TES       | -0.01618 | 0.714139 | 0.796316 | 515 | 515 |
| C15orf37  | -0.01618 | 0.714167 | 0.796316 | 515 | 515 |
| LRRC29    | -0.01617 | 0.714275 | 0.796392 | 515 | 515 |
| NDUFA3    | -0.01615 | 0.714703 | 0.796647 | 515 | 515 |
| OTP       | -0.0161  | 0.715467 | 0.797358 | 515 | 244 |
| ASTN1     | -0.0161  | 0.715543 | 0.797361 | 515 | 436 |
| KRTAP3-3  | -0.01609 | 0.715688 | 0.797455 | 515 | 29  |
| GFRA3     | -0.01609 | 0.715706 | 0.797455 | 515 | 514 |
| KIAA1109  | -0.01603 | 0.716719 | 0.798405 | 515 | 515 |
| POU1F1    | -0.01598 | 0.717471 | 0.799109 | 515 | 153 |
| TRIM64    | -0.01597 | 0.717626 | 0.799203 | 515 | 11  |
| GDE1      | -0.01597 | 0.717657 | 0.799203 | 515 | 515 |
| SPTLC2    | -0.01597 | 0.717675 | 0.799203 | 515 | 515 |
| ENY2      | -0.01592 | 0.718511 | 0.799829 | 515 | 515 |
| ZNF572    | -0.01592 | 0.718523 | 0.799829 | 515 | 515 |
| SPINT4    | -0.01592 | 0.718558 | 0.799829 | 515 | 22  |
| C6orf217  | -0.01589 | 0.718992 | 0.800223 | 515 | 479 |
| TXNRD3IT1 | -0.01586 | 0.719482 | 0.800567 | 515 | 515 |
| PILRB     | -0.01586 | 0.719494 | 0.800567 | 515 | 515 |
| WDR31     | -0.01586 | 0.719515 | 0.800567 | 515 | 515 |
| CCDC40    | -0.01586 | 0.719541 | 0.800567 | 515 | 515 |
| LOC619207 | -0.01586 | 0.719625 | 0.800616 | 515 | 513 |



|           |          |          |          |     |     |
|-----------|----------|----------|----------|-----|-----|
| SNED1     | -0.01582 | 0.720155 | 0.801028 | 515 | 515 |
| UMOD      | -0.01582 | 0.720199 | 0.801031 | 515 | 41  |
| SAV1      | -0.0158  | 0.720573 | 0.801403 | 515 | 515 |
| AGAP6     | -0.01577 | 0.721021 | 0.801856 | 515 | 515 |
| C10orf118 | -0.01576 | 0.721168 | 0.801947 | 515 | 515 |
| ALOXE3    | -0.01576 | 0.721183 | 0.801947 | 515 | 494 |
| HCN4      | -0.01573 | 0.721797 | 0.802496 | 515 | 472 |
| CCNB3     | -0.01572 | 0.721982 | 0.802613 | 515 | 507 |
| LOC285456 | -0.0157  | 0.722274 | 0.802893 | 515 | 426 |
| KLK6      | -0.01569 | 0.722383 | 0.802924 | 515 | 430 |
| HS6ST2    | -0.01569 | 0.722477 | 0.802946 | 515 | 515 |
| SNORA14A  | -0.01568 | 0.722563 | 0.802946 | 515 | 8   |
| SMC5      | -0.01568 | 0.722632 | 0.802978 | 515 | 515 |
| HMG5      | -0.01566 | 0.722865 | 0.803193 | 515 | 515 |
| TCAM1P    | -0.01566 | 0.723013 | 0.803305 | 515 | 434 |
| SUSD4     | -0.01565 | 0.723087 | 0.803305 | 515 | 515 |
| CATSPER2  | -0.01564 | 0.723234 | 0.803379 | 515 | 515 |
| SEBOX     | -0.01564 | 0.723353 | 0.803466 | 515 | 85  |
| TP53      | -0.01561 | 0.723772 | 0.803775 | 515 | 515 |
| CDH16     | -0.01561 | 0.723792 | 0.803775 | 515 | 325 |
| AUTS2     | -0.01559 | 0.724185 | 0.804012 | 515 | 515 |
| NF2       | -0.01558 | 0.72427  | 0.804012 | 515 | 515 |
| EEF1DP3   | -0.01558 | 0.724299 | 0.804012 | 515 | 480 |
| GAGE12F   | -0.01553 | 0.72513  | 0.804814 | 515 | 8   |
| GSTT2     | -0.01548 | 0.726022 | 0.805674 | 515 | 514 |
| OR5H2     | -0.01548 | 0.726026 | 0.805674 | 515 | 22  |
| HHIPL2    | -0.01546 | 0.726308 | 0.805853 | 515 | 498 |
| KRT25     | -0.01544 | 0.726719 | 0.806227 | 515 | 18  |
| KIAA1731  | -0.01544 | 0.726736 | 0.806227 | 515 | 515 |
| LOC644165 | -0.01543 | 0.726766 | 0.806227 | 515 | 513 |
| AOX2P     | -0.01542 | 0.72695  | 0.806366 | 515 | 107 |
| RTN4R     | -0.01538 | 0.727615 | 0.806901 | 515 | 515 |
| NP1P      | -0.01535 | 0.728268 | 0.807446 | 515 | 515 |
| HIST1H2BF | -0.01533 | 0.728567 | 0.807732 | 515 | 379 |
| VPS4B     | -0.01532 | 0.728761 | 0.807767 | 515 | 515 |
| TPTE2P3   | -0.01531 | 0.728918 | 0.807897 | 515 | 156 |
| SRRM4     | -0.01528 | 0.729441 | 0.808297 | 515 | 338 |
| TMCO3     | -0.01524 | 0.73     | 0.808782 | 515 | 515 |
| MPP3      | -0.01524 | 0.730129 | 0.808881 | 515 | 515 |
| FTSJ1     | -0.01521 | 0.7305   | 0.809129 | 515 | 515 |
| B3GNT6    | -0.01517 | 0.731226 | 0.809806 | 515 | 501 |
| MRPS10    | -0.01517 | 0.731248 | 0.809806 | 515 | 515 |
| BMS1P4    | -0.01517 | 0.731302 | 0.809821 | 515 | 511 |
| LACRT     | -0.01513 | 0.731968 | 0.810469 | 515 | 5   |
| GALNS     | -0.01512 | 0.732036 | 0.810499 | 515 | 515 |
| PAN3      | -0.01511 | 0.732354 | 0.810806 | 515 | 515 |
| GLYAT     | -0.0151  | 0.73249  | 0.81088  | 515 | 70  |
| TBC1D3H   | -0.0151  | 0.732502 | 0.81088  | 515 | 514 |
| LIPE      | -0.01506 | 0.733198 | 0.811415 | 515 | 515 |
| ADH7      | -0.01505 | 0.733228 | 0.811415 | 515 | 375 |
| CIRH1A    | -0.01505 | 0.733298 | 0.811447 | 515 | 515 |
| NKX1-2    | -0.01503 | 0.733631 | 0.811681 | 515 | 228 |
| SLC3A1    | -0.01498 | 0.734487 | 0.812447 | 515 | 511 |
| ZNHIT3    | -0.01496 | 0.7349   | 0.812825 | 515 | 515 |

|           |          |          |          |     |     |
|-----------|----------|----------|----------|-----|-----|
| AGAP5     | -0.01495 | 0.735009 | 0.81289  | 515 | 515 |
| PROM1     | -0.01494 | 0.735225 | 0.813038 | 515 | 514 |
| NDUFS4    | -0.01493 | 0.735416 | 0.813162 | 515 | 515 |
| CYP2D7P1  | -0.01492 | 0.735572 | 0.813287 | 515 | 505 |
| ZNF828    | -0.01491 | 0.735737 | 0.813425 | 515 | 515 |
| IL1RL2    | -0.0149  | 0.735787 | 0.813436 | 515 | 514 |
| OR6C2     | -0.0149  | 0.735844 | 0.813454 | 515 | 24  |
| CABP7     | -0.01487 | 0.736299 | 0.813739 | 515 | 512 |
| TMEM209   | -0.01487 | 0.736397 | 0.813749 | 515 | 515 |
| LOC145845 | -0.01484 | 0.736844 | 0.814109 | 515 | 32  |
| PPBP      | -0.01484 | 0.736909 | 0.814135 | 515 | 465 |
| FAM154A   | -0.0148  | 0.737539 | 0.814697 | 515 | 289 |
| BAZ2B     | -0.01478 | 0.73789  | 0.814904 | 515 | 515 |
| SPAG11B   | -0.01475 | 0.738359 | 0.815287 | 515 | 45  |
| SLC35E4   | -0.01474 | 0.738594 | 0.815456 | 515 | 515 |
| TMEM219   | -0.01474 | 0.73864  | 0.815461 | 515 | 515 |
| GYS2      | -0.01474 | 0.738682 | 0.815463 | 515 | 377 |
| TTC21B    | -0.01472 | 0.738871 | 0.815627 | 515 | 515 |
| ZNF678    | -0.01471 | 0.73907  | 0.815752 | 515 | 515 |
| PRAMEF5   | -0.01471 | 0.739107 | 0.815752 | 515 | 10  |
| PLXNA3    | -0.0147  | 0.739223 | 0.815808 | 515 | 515 |
| OTUD6A    | -0.0147  | 0.739279 | 0.815808 | 515 | 19  |
| LOC284632 | -0.0147  | 0.73928  | 0.815808 | 515 | 151 |
| LINGO2    | -0.01468 | 0.73956  | 0.816072 | 515 | 353 |
| GAL       | -0.01466 | 0.740016 | 0.816394 | 515 | 435 |
| LOC150381 | -0.01462 | 0.74066  | 0.81697  | 515 | 514 |
| FAM3D     | -0.01462 | 0.740708 | 0.816977 | 515 | 503 |
| LOC91948  | -0.01458 | 0.741291 | 0.81753  | 515 | 216 |
| LARP4     | -0.01455 | 0.741924 | 0.818094 | 515 | 515 |
| C15orf24  | -0.01453 | 0.74219  | 0.818289 | 515 | 515 |
| TMPRSS11A | -0.01452 | 0.742361 | 0.818289 | 515 | 225 |
| IL25      | -0.01451 | 0.74247  | 0.818289 | 515 | 109 |
| SPG11     | -0.01447 | 0.743171 | 0.818926 | 515 | 515 |
| CNGA2     | -0.01446 | 0.743415 | 0.819104 | 515 | 20  |
| PSMA7     | -0.01442 | 0.744106 | 0.819657 | 515 | 515 |
| ALS2CL    | -0.01441 | 0.744265 | 0.819657 | 515 | 515 |
| OR2A12    | -0.01441 | 0.744278 | 0.819657 | 515 | 16  |
| OR13C2    | -0.01441 | 0.744306 | 0.819657 | 515 | 26  |
| ZNF518A   | -0.01441 | 0.744326 | 0.819657 | 515 | 515 |
| METTL11A  | -0.0144  | 0.744409 | 0.819703 | 515 | 515 |
| 9-Mar     | -0.01439 | 0.744515 | 0.819752 | 515 | 515 |
| RPS27     | -0.01438 | 0.744703 | 0.819891 | 515 | 515 |
| AQP12A    | -0.01437 | 0.744892 | 0.820054 | 515 | 56  |
| HIGD2B    | -0.01436 | 0.745022 | 0.820107 | 515 | 226 |
| SCARNA4   | -0.01436 | 0.74516  | 0.820213 | 515 | 14  |
| DCLK3     | -0.01434 | 0.745419 | 0.820419 | 515 | 507 |
| NLRP11    | -0.01432 | 0.745793 | 0.820775 | 515 | 381 |
| BUB1B     | -0.01431 | 0.745961 | 0.820915 | 515 | 515 |
| PPIAL4E   | -0.0143  | 0.746078 | 0.820953 | 515 | 27  |
| LYPD6     | -0.01427 | 0.74663  | 0.821379 | 515 | 505 |
| FHDC1     | -0.01425 | 0.747065 | 0.821762 | 515 | 515 |
| TUBB3     | -0.01424 | 0.747143 | 0.821762 | 515 | 515 |
| ADAMTS7   | -0.01421 | 0.747686 | 0.822197 | 515 | 515 |
| SNORA24   | -0.01414 | 0.748855 | 0.823273 | 515 | 138 |

|           |          |          |          |     |     |
|-----------|----------|----------|----------|-----|-----|
| MSH3      | -0.01414 | 0.748886 | 0.823273 | 515 | 515 |
| BREA2     | -0.01411 | 0.749332 | 0.823718 | 515 | 500 |
| CCDC83    | -0.0141  | 0.74964  | 0.823919 | 515 | 90  |
| NPDC1     | -0.01406 | 0.750229 | 0.824477 | 515 | 515 |
| DPY19L2P1 | -0.01406 | 0.750287 | 0.824495 | 515 | 411 |
| SUV39H2   | -0.01401 | 0.751024 | 0.825169 | 515 | 515 |
| COX4I1    | -0.01401 | 0.751103 | 0.82521  | 515 | 515 |
| OR13D1    | -0.01398 | 0.751556 | 0.825623 | 515 | 47  |
| TPI1P3    | -0.01398 | 0.751562 | 0.825623 | 515 | 376 |
| VDAC1     | -0.01396 | 0.751963 | 0.826019 | 515 | 515 |
| LOC729991 | -0.01394 | 0.752274 | 0.82627  | 515 | 515 |
| THNSL2    | -0.01393 | 0.752467 | 0.826391 | 515 | 515 |
| GRIK1     | -0.01384 | 0.75398  | 0.827779 | 515 | 347 |
| KRTAP4-4  | -0.01383 | 0.754228 | 0.828006 | 515 | 11  |
| LOC388242 | -0.01379 | 0.754913 | 0.828576 | 515 | 514 |
| CNOT6     | -0.01378 | 0.755111 | 0.828748 | 515 | 515 |
| ERRFI1    | -0.01375 | 0.755604 | 0.829152 | 515 | 515 |
| KCNIP3    | -0.01371 | 0.756288 | 0.829767 | 515 | 515 |
| UBE2E3    | -0.01366 | 0.757049 | 0.830465 | 515 | 515 |
| CDK12     | -0.01366 | 0.757096 | 0.830471 | 515 | 515 |
| MAML1     | -0.01365 | 0.757308 | 0.830658 | 515 | 515 |
| ASZ1      | -0.01364 | 0.757447 | 0.830702 | 515 | 234 |
| TBC1D3C   | -0.01364 | 0.75755  | 0.830711 | 515 | 490 |
| POM121L1C | -0.01363 | 0.757681 | 0.830747 | 515 | 497 |
| NFIC      | -0.01361 | 0.758042 | 0.831036 | 515 | 515 |
| GPATCH8   | -0.0136  | 0.758109 | 0.831036 | 515 | 515 |
| C2orf67   | -0.01359 | 0.758299 | 0.831188 | 515 | 515 |
| HRASLS5   | -0.01359 | 0.758333 | 0.831188 | 515 | 510 |
| TLL4      | -0.01357 | 0.758652 | 0.831447 | 515 | 515 |
| C2orf78   | -0.01355 | 0.758976 | 0.831712 | 515 | 56  |
| C2orf57   | -0.01352 | 0.759476 | 0.832168 | 515 | 119 |
| VCX2      | -0.01347 | 0.760419 | 0.832881 | 515 | 48  |
| AMBN      | -0.01346 | 0.76059  | 0.833023 | 515 | 73  |
| ZNF300    | -0.01344 | 0.760833 | 0.833244 | 515 | 515 |
| PCDHGB1   | -0.01343 | 0.761053 | 0.833394 | 515 | 512 |
| TBKBP1    | -0.01343 | 0.761149 | 0.833452 | 515 | 515 |
| CAPNS1    | -0.01342 | 0.761271 | 0.833495 | 515 | 515 |
| ITGB4     | -0.01341 | 0.761353 | 0.833539 | 515 | 515 |
| GRINL1A   | -0.01338 | 0.761961 | 0.834068 | 515 | 515 |
| OR1C1     | -0.01337 | 0.762082 | 0.834109 | 515 | 15  |
| MYF5      | -0.01337 | 0.762169 | 0.834158 | 515 | 7   |
| GALR1     | -0.01335 | 0.762544 | 0.834422 | 515 | 107 |
| LONRF3    | -0.01334 | 0.762577 | 0.834422 | 515 | 515 |
| WDR25     | -0.01333 | 0.762835 | 0.834659 | 515 | 515 |
| GINS4     | -0.0133  | 0.763282 | 0.835023 | 515 | 515 |
| RHOXF2B   | -0.0133  | 0.763382 | 0.835028 | 515 | 141 |
| C11orf41  | -0.01326 | 0.763956 | 0.83534  | 515 | 515 |
| TMEM151B  | -0.01326 | 0.76399  | 0.83534  | 515 | 514 |
| TNRC6B    | -0.01326 | 0.764026 | 0.83534  | 515 | 515 |
| BDNF      | -0.01325 | 0.76415  | 0.835412 | 515 | 514 |
| CUX1      | -0.01324 | 0.764363 | 0.835598 | 515 | 515 |
| ZNF487    | -0.01324 | 0.764447 | 0.835599 | 515 | 515 |
| CDK7      | -0.01321 | 0.764855 | 0.835954 | 515 | 515 |
| TMEM108   | -0.0132  | 0.765026 | 0.83605  | 515 | 515 |

|           |          |          |          |     |     |
|-----------|----------|----------|----------|-----|-----|
| IL22RA1   | -0.01319 | 0.765195 | 0.836123 | 515 | 510 |
| C3orf39   | -0.01319 | 0.765259 | 0.836123 | 515 | 515 |
| MLL5      | -0.01319 | 0.765316 | 0.836137 | 515 | 515 |
| MUS81     | -0.01316 | 0.765834 | 0.83652  | 515 | 515 |
| SLC10A1   | -0.01315 | 0.765951 | 0.836603 | 515 | 247 |
| LSM5      | -0.01314 | 0.76609  | 0.836708 | 515 | 515 |
| OR9K2     | -0.01312 | 0.766399 | 0.837    | 515 | 7   |
| EIF2B3    | -0.0131  | 0.76682  | 0.837368 | 515 | 515 |
| DCST1     | -0.01308 | 0.767073 | 0.83745  | 515 | 358 |
| PSMD11    | -0.01308 | 0.767112 | 0.83745  | 515 | 515 |
| ZFP112    | -0.01308 | 0.767146 | 0.83745  | 515 | 515 |
| HMG3      | -0.01307 | 0.767283 | 0.837554 | 515 | 515 |
| TRIM65    | -0.01306 | 0.767526 | 0.837774 | 515 | 515 |
| ARL16     | -0.01305 | 0.767713 | 0.837931 | 515 | 515 |
| ABCB4     | -0.01304 | 0.76779  | 0.83797  | 515 | 515 |
| LCOR      | -0.01303 | 0.768077 | 0.838114 | 515 | 515 |
| ZNF271    | -0.01302 | 0.768095 | 0.838114 | 515 | 515 |
| SIRT6     | -0.01301 | 0.768321 | 0.838191 | 515 | 515 |
| TRABD     | -0.01301 | 0.768328 | 0.838191 | 515 | 515 |
| XBP1      | -0.01299 | 0.768613 | 0.838365 | 515 | 515 |
| ARMC10    | -0.01298 | 0.76884  | 0.838567 | 515 | 515 |
| CXorf58   | -0.01297 | 0.768971 | 0.838664 | 515 | 392 |
| SLC22A20  | -0.01287 | 0.770772 | 0.840399 | 515 | 512 |
| TMEM150C  | -0.01285 | 0.771178 | 0.840696 | 515 | 515 |
| ZSCAN1    | -0.01285 | 0.771193 | 0.840696 | 515 | 383 |
| SC5DL     | -0.01279 | 0.772092 | 0.841517 | 515 | 515 |
| NCRNA0020 | -0.01278 | 0.772261 | 0.841655 | 515 | 253 |
| ZYG11A    | -0.01278 | 0.772358 | 0.841688 | 515 | 503 |
| C18orf10  | -0.01277 | 0.772493 | 0.84177  | 515 | 515 |
| WNK4      | -0.01275 | 0.772769 | 0.841984 | 515 | 508 |
| OR6C75    | -0.01275 | 0.772774 | 0.841984 | 515 | 6   |
| SNRNP27   | -0.01269 | 0.773963 | 0.842958 | 515 | 515 |
| KTI12     | -0.01266 | 0.774487 | 0.843355 | 515 | 515 |
| CCBP2     | -0.01264 | 0.774677 | 0.843506 | 515 | 515 |
| OR4K1     | -0.01263 | 0.774983 | 0.843728 | 515 | 4   |
| HIPK4     | -0.01263 | 0.775007 | 0.843728 | 515 | 500 |
| EPB41     | -0.0126  | 0.775401 | 0.844065 | 515 | 515 |
| TMEM189-U | -0.01258 | 0.775851 | 0.844417 | 515 | 196 |
| ASFMR1    | -0.01255 | 0.776359 | 0.844766 | 515 | 322 |
| ZNF124    | -0.01255 | 0.776384 | 0.844766 | 515 | 515 |
| MAN1A2    | -0.01254 | 0.776476 | 0.84482  | 515 | 515 |
| WBP11P1   | -0.01251 | 0.777    | 0.845215 | 515 | 515 |
| AFF4      | -0.01251 | 0.777081 | 0.845215 | 515 | 515 |
| LOC728554 | -0.0125  | 0.777173 | 0.845255 | 515 | 515 |
| RGR       | -0.0125  | 0.777213 | 0.845255 | 515 | 64  |
| DEFB115   | -0.01249 | 0.777296 | 0.845299 | 515 | 4   |
| LCE2C     | -0.01249 | 0.777426 | 0.845394 | 515 | 12  |
| HOXA9     | -0.01247 | 0.777674 | 0.84557  | 515 | 504 |
| TMEM165   | -0.01247 | 0.777685 | 0.84557  | 515 | 515 |
| LOC92973  | -0.01244 | 0.778308 | 0.846124 | 515 | 511 |
| HIST1H4C  | -0.01242 | 0.778509 | 0.84625  | 515 | 363 |
| PRSS55    | -0.0124  | 0.778903 | 0.846632 | 515 | 104 |
| FAM81A    | -0.01238 | 0.779192 | 0.846821 | 515 | 514 |
| UBB       | -0.01238 | 0.779242 | 0.846821 | 515 | 515 |

|           |          |          |          |     |     |
|-----------|----------|----------|----------|-----|-----|
| YARS2     | -0.01234 | 0.779903 | 0.84735  | 515 | 515 |
| HDAC10    | -0.01232 | 0.780305 | 0.847695 | 515 | 515 |
| LOC286359 | -0.01231 | 0.780559 | 0.847878 | 515 | 50  |
| MAFF      | -0.0123  | 0.780687 | 0.847925 | 515 | 515 |
| VPS16     | -0.01226 | 0.781386 | 0.848532 | 515 | 515 |
| CHRNA10   | -0.01226 | 0.781418 | 0.848532 | 515 | 515 |
| OR7E37P   | -0.01225 | 0.781472 | 0.848532 | 515 | 294 |
| TROAP     | -0.01225 | 0.78158  | 0.848532 | 515 | 515 |
| FASTKD1   | -0.01225 | 0.781585 | 0.848532 | 515 | 515 |
| INS       | -0.01221 | 0.782166 | 0.849071 | 515 | 10  |
| GCNT7     | -0.01219 | 0.78262  | 0.849333 | 515 | 363 |
| SIAH2     | -0.01213 | 0.783665 | 0.85019  | 515 | 515 |
| IRX4      | -0.0121  | 0.784079 | 0.850425 | 515 | 183 |
| LOC80054  | -0.0121  | 0.784101 | 0.850425 | 515 | 515 |
| SLC23A3   | -0.0121  | 0.78418  | 0.850425 | 515 | 511 |
| TMPRSS15  | -0.01208 | 0.784452 | 0.850627 | 515 | 203 |
| NPPB      | -0.01207 | 0.784574 | 0.850627 | 515 | 105 |
| PACRGL    | -0.01207 | 0.784579 | 0.850627 | 515 | 515 |
| AK1       | -0.01205 | 0.785018 | 0.850938 | 515 | 515 |
| TPCN1     | -0.01204 | 0.785246 | 0.851074 | 515 | 515 |
| H2BFM     | -0.01203 | 0.785336 | 0.851079 | 515 | 64  |
| ZNF425    | -0.012   | 0.785811 | 0.851501 | 515 | 515 |
| RAB3C     | -0.01199 | 0.786041 | 0.851704 | 515 | 378 |
| HERC4     | -0.01199 | 0.786106 | 0.851728 | 515 | 515 |
| KRTAP10-5 | -0.01198 | 0.786275 | 0.851866 | 515 | 9   |
| OR4N4     | -0.01195 | 0.786674 | 0.852206 | 515 | 35  |
| SEMA6D    | -0.01191 | 0.787367 | 0.852817 | 515 | 515 |
| TRNAU1AP  | -0.01191 | 0.78742  | 0.852829 | 515 | 515 |
| TMEM179   | -0.01188 | 0.787975 | 0.853306 | 515 | 133 |
| ANKRD45   | -0.01187 | 0.78808  | 0.853306 | 515 | 513 |
| HSPA4     | -0.01187 | 0.788086 | 0.853306 | 515 | 515 |
| MSL3L2    | -0.01187 | 0.788111 | 0.853306 | 515 | 515 |
| FANCL     | -0.01187 | 0.788177 | 0.853306 | 515 | 515 |
| HAVCR1    | -0.01187 | 0.788188 | 0.853306 | 515 | 432 |
| TF        | -0.01187 | 0.788222 | 0.853306 | 515 | 511 |
| C21orf63  | -0.01186 | 0.788259 | 0.853306 | 515 | 515 |
| NCAPD3    | -0.01186 | 0.788288 | 0.853306 | 515 | 515 |
| ACCSL     | -0.01185 | 0.788423 | 0.853406 | 515 | 51  |
| NKX2-5    | -0.01185 | 0.788503 | 0.85344  | 515 | 159 |
| SLC25A27  | -0.01184 | 0.788586 | 0.85344  | 515 | 515 |
| HEY2      | -0.01184 | 0.788604 | 0.85344  | 515 | 515 |
| SH2D5     | -0.01183 | 0.788813 | 0.853551 | 515 | 461 |
| PSORS1C1  | -0.01182 | 0.788941 | 0.853644 | 515 | 502 |
| USP50     | -0.01176 | 0.790119 | 0.854641 | 515 | 66  |
| GPX4      | -0.01174 | 0.790331 | 0.854777 | 515 | 515 |
| GALP      | -0.01173 | 0.79061  | 0.855032 | 515 | 60  |
| DLK2      | -0.01172 | 0.790699 | 0.855082 | 515 | 511 |
| LEKR1     | -0.01171 | 0.79095  | 0.855262 | 515 | 514 |
| NBR1      | -0.0117  | 0.791107 | 0.855339 | 515 | 515 |
| AGR3      | -0.01169 | 0.791277 | 0.855476 | 515 | 511 |
| OR4F4     | -0.01167 | 0.791705 | 0.855754 | 515 | 8   |
| ME1       | -0.01165 | 0.791926 | 0.8559   | 515 | 515 |
| C2orf62   | -0.01163 | 0.792246 | 0.856107 | 515 | 499 |
| UNC119B   | -0.01163 | 0.792349 | 0.856172 | 515 | 515 |

|           |          |          |          |     |     |
|-----------|----------|----------|----------|-----|-----|
| CRNN      | -0.01162 | 0.792537 | 0.856329 | 515 | 90  |
| C9orf150  | -0.01157 | 0.793288 | 0.857002 | 515 | 515 |
| EHF       | -0.01156 | 0.793463 | 0.857098 | 515 | 515 |
| ZNF98     | -0.01156 | 0.793463 | 0.857098 | 515 | 399 |
| SPINK9    | -0.01156 | 0.793566 | 0.857162 | 515 | 103 |
| TSPYL2    | -0.01155 | 0.793797 | 0.857273 | 515 | 515 |
| GNA14     | -0.01153 | 0.794067 | 0.857473 | 515 | 515 |
| C1orf21   | -0.01153 | 0.794144 | 0.857486 | 515 | 515 |
| FAM46B    | -0.01151 | 0.794485 | 0.857646 | 515 | 515 |
| NBEAL2    | -0.0115  | 0.794539 | 0.857658 | 515 | 515 |
| ATP4A     | -0.01149 | 0.794715 | 0.857801 | 515 | 149 |
| NCKAP5L   | -0.01149 | 0.79484  | 0.85789  | 515 | 515 |
| ALAD      | -0.01147 | 0.795082 | 0.858105 | 515 | 515 |
| BSX       | -0.01143 | 0.795801 | 0.858695 | 515 | 25  |
| OR1M1     | -0.01142 | 0.796001 | 0.858818 | 515 | 38  |
| LOC375190 | -0.0114  | 0.796303 | 0.859098 | 515 | 515 |
| GLT8D1    | -0.01137 | 0.796931 | 0.859683 | 515 | 515 |
| SUZ12P    | -0.01135 | 0.79713  | 0.859851 | 515 | 515 |
| SLC35E3   | -0.01134 | 0.797376 | 0.859977 | 515 | 515 |
| NAGLU     | -0.01131 | 0.797936 | 0.860391 | 515 | 515 |
| BBC3      | -0.0113  | 0.798049 | 0.860391 | 515 | 515 |
| TPTE      | -0.01129 | 0.798271 | 0.860571 | 515 | 340 |
| LRRC42    | -0.01126 | 0.798754 | 0.860999 | 515 | 515 |
| KCTD18    | -0.01125 | 0.799046 | 0.861127 | 515 | 515 |
| LRRC48    | -0.01123 | 0.799324 | 0.861273 | 515 | 515 |
| SFRS11    | -0.01123 | 0.799353 | 0.861273 | 515 | 515 |
| USP13     | -0.0112  | 0.799749 | 0.861607 | 515 | 515 |
| TBC1D3    | -0.0112  | 0.799872 | 0.861693 | 515 | 515 |
| CAPS      | -0.01119 | 0.799972 | 0.861711 | 515 | 514 |
| APCS      | -0.01119 | 0.800062 | 0.861711 | 515 | 70  |
| CXorf1    | -0.01116 | 0.800457 | 0.862091 | 515 | 79  |
| CDKN2AIPN | -0.01113 | 0.801012 | 0.862503 | 515 | 515 |
| RGS6      | -0.01112 | 0.801248 | 0.862672 | 515 | 457 |
| CCDC129   | -0.01109 | 0.801706 | 0.86311  | 515 | 430 |
| MED27     | -0.01108 | 0.80197  | 0.863254 | 515 | 515 |
| DNAH5     | -0.01105 | 0.802499 | 0.863591 | 515 | 515 |
| IFNA13    | -0.01103 | 0.802795 | 0.863817 | 515 | 94  |
| DSG3      | -0.01102 | 0.803067 | 0.864063 | 515 | 390 |
| DBX2      | -0.01101 | 0.80318  | 0.864138 | 515 | 94  |
| ING1      | -0.01099 | 0.803426 | 0.864357 | 515 | 515 |
| LOC255025 | -0.01098 | 0.803765 | 0.864675 | 515 | 9   |
| METAP2    | -0.01096 | 0.804002 | 0.864836 | 515 | 515 |
| LOC644172 | -0.01095 | 0.804255 | 0.865016 | 515 | 508 |
| DPM1      | -0.01092 | 0.804682 | 0.865382 | 515 | 515 |
| TRIM6-TRI | -0.0109  | 0.80508  | 0.865716 | 515 | 56  |
| DCAF12    | -0.01089 | 0.805276 | 0.86588  | 515 | 515 |
| FBLL1     | -0.01089 | 0.805337 | 0.8659   | 515 | 410 |
| C14orf143 | -0.01086 | 0.805746 | 0.866153 | 515 | 515 |
| WDYHV1    | -0.01085 | 0.805995 | 0.866314 | 515 | 515 |
| KCNK18    | -0.01081 | 0.806652 | 0.866814 | 515 | 7   |
| LOC643008 | -0.01081 | 0.806665 | 0.866814 | 515 | 514 |
| AGPAT5    | -0.0108  | 0.806917 | 0.867039 | 515 | 515 |
| OR51A7    | -0.01079 | 0.806988 | 0.867069 | 515 | 7   |
| CLEC18C   | -0.01073 | 0.807997 | 0.867966 | 515 | 310 |

|          |          |          |          |     |     |
|----------|----------|----------|----------|-----|-----|
| MAP9     | -0.01072 | 0.808286 | 0.868071 | 515 | 515 |
| C4orf17  | -0.01072 | 0.808311 | 0.868071 | 515 | 68  |
| C3orf14  | -0.01071 | 0.808503 | 0.86823  | 515 | 515 |
| COLEC10  | -0.0107  | 0.808662 | 0.868354 | 515 | 476 |
| UMODL1   | -0.01068 | 0.808991 | 0.868542 | 515 | 500 |
| KIF23    | -0.01068 | 0.809011 | 0.868542 | 515 | 515 |
| KRTAP4-3 | -0.01067 | 0.809147 | 0.868641 | 515 | 7   |
| UBQLNL   | -0.01067 | 0.809203 | 0.868654 | 515 | 515 |
| SDAD1    | -0.01065 | 0.809408 | 0.868828 | 515 | 515 |
| TMEM5    | -0.01061 | 0.810246 | 0.869634 | 515 | 515 |
| RNASE8   | -0.0106  | 0.810326 | 0.869674 | 515 | 17  |
| CCDC160  | -0.0106  | 0.810385 | 0.86969  | 515 | 489 |
| FLJ36777 | -0.01058 | 0.810699 | 0.869935 | 515 | 497 |
| EIF1     | -0.01058 | 0.810701 | 0.869935 | 515 | 515 |
| TSSK3    | -0.01052 | 0.811668 | 0.870833 | 515 | 515 |
| TTC4     | -0.01049 | 0.812306 | 0.871348 | 515 | 515 |
| REM2     | -0.01049 | 0.812317 | 0.871348 | 515 | 515 |
| KCTD13   | -0.01049 | 0.812366 | 0.871348 | 515 | 515 |
| PHACTR3  | -0.01047 | 0.812589 | 0.871467 | 515 | 511 |
| SLC35E1  | -0.01047 | 0.812608 | 0.871467 | 515 | 515 |
| C5orf54  | -0.01046 | 0.812805 | 0.871583 | 515 | 515 |
| TRIM54   | -0.01046 | 0.812882 | 0.871583 | 515 | 487 |
| NHLH2    | -0.01046 | 0.81289  | 0.871583 | 515 | 360 |
| FAM46D   | -0.01045 | 0.812953 | 0.871604 | 515 | 162 |
| HDAC4    | -0.0104  | 0.813775 | 0.872111 | 515 | 515 |
| C5orf52  | -0.01038 | 0.814156 | 0.872472 | 515 | 47  |
| DUSP27   | -0.01038 | 0.814273 | 0.872509 | 515 | 408 |
| C4orf35  | -0.01038 | 0.814277 | 0.872509 | 515 | 7   |
| MDK      | -0.01035 | 0.814744 | 0.872915 | 515 | 515 |
| ZFPM1    | -0.01033 | 0.81508  | 0.873181 | 515 | 515 |
| TMEM31   | -0.01031 | 0.815425 | 0.873363 | 515 | 379 |
| CCDC97   | -0.01029 | 0.815728 | 0.873641 | 515 | 515 |
| SLC23A2  | -0.01026 | 0.816405 | 0.874218 | 515 | 515 |
| GRB10    | -0.01025 | 0.816483 | 0.874218 | 515 | 515 |
| EPHA6    | -0.01024 | 0.816689 | 0.874342 | 515 | 378 |
| TMEM167A | -0.01022 | 0.816978 | 0.874558 | 515 | 515 |
| ACBD4    | -0.01022 | 0.817071 | 0.874612 | 515 | 515 |
| MSGN1    | -0.01021 | 0.817152 | 0.874652 | 515 | 29  |
| CDH17    | -0.0102  | 0.817373 | 0.874775 | 515 | 505 |
| GPR107   | -0.01019 | 0.817549 | 0.874872 | 515 | 515 |
| C7orf46  | -0.01018 | 0.817766 | 0.874921 | 515 | 515 |
| OCM2     | -0.01018 | 0.817799 | 0.874921 | 515 | 12  |
| PNLIPRP2 | -0.01017 | 0.81797  | 0.875058 | 515 | 70  |
| RHAG     | -0.01015 | 0.818342 | 0.875396 | 515 | 47  |
| HIPK2    | -0.01011 | 0.818893 | 0.875841 | 515 | 515 |
| CCDC101  | -0.01009 | 0.819291 | 0.876083 | 515 | 515 |
| MAL2     | -0.01009 | 0.819376 | 0.876083 | 515 | 515 |
| YWHAG    | -0.01008 | 0.819402 | 0.876083 | 515 | 515 |
| LYZL6    | -0.01008 | 0.819406 | 0.876083 | 515 | 22  |
| CHORDC1  | -0.01008 | 0.81941  | 0.876083 | 515 | 515 |
| SLC13A2  | -0.01006 | 0.819784 | 0.876342 | 515 | 380 |
| CCDC117  | -0.01005 | 0.819953 | 0.876476 | 515 | 515 |
| FLJ45340 | -0.01004 | 0.820262 | 0.87676  | 515 | 515 |
| C12orf66 | -0.01003 | 0.820333 | 0.876789 | 515 | 515 |

|           |          |          |          |     |     |
|-----------|----------|----------|----------|-----|-----|
| USP17L6P  | -0.01    | 0.820913 | 0.877174 | 515 | 10  |
| GMPS      | -0.00996 | 0.821578 | 0.877592 | 515 | 515 |
| SMYD1     | -0.00996 | 0.821585 | 0.877592 | 515 | 68  |
| RNMT      | -0.00994 | 0.821883 | 0.877775 | 515 | 515 |
| UPF0639   | -0.00994 | 0.821915 | 0.877775 | 515 | 420 |
| PTN       | -0.00991 | 0.822408 | 0.878119 | 515 | 515 |
| ZZZ3      | -0.00991 | 0.822413 | 0.878119 | 515 | 515 |
| GALNT12   | -0.00989 | 0.822766 | 0.878403 | 515 | 515 |
| LCN9      | -0.00985 | 0.823474 | 0.878889 | 515 | 8   |
| CECR7     | -0.00985 | 0.823485 | 0.878889 | 515 | 495 |
| PCDHB11   | -0.0098  | 0.824442 | 0.879816 | 515 | 515 |
| ACAN      | -0.00976 | 0.825105 | 0.880148 | 515 | 513 |
| NOM1      | -0.00976 | 0.825152 | 0.88015  | 515 | 515 |
| RBX1      | -0.00965 | 0.827029 | 0.881823 | 515 | 515 |
| TGOLN2    | -0.00964 | 0.827187 | 0.881944 | 515 | 515 |
| TMED9     | -0.00964 | 0.827275 | 0.881991 | 515 | 515 |
| C5orf48   | -0.00964 | 0.82733  | 0.882003 | 515 | 19  |
| GPLD1     | -0.00963 | 0.827462 | 0.882037 | 515 | 513 |
| SNORA11D  | -0.0096  | 0.82798  | 0.882375 | 515 | 6   |
| RNF219    | -0.00958 | 0.828318 | 0.882633 | 515 | 515 |
| KHDC1L    | -0.00956 | 0.828701 | 0.882906 | 515 | 363 |
| OR13F1    | -0.00953 | 0.829238 | 0.883395 | 515 | 7   |
| AK5       | -0.00953 | 0.829255 | 0.883395 | 515 | 448 |
| B9D2      | -0.00952 | 0.829362 | 0.883462 | 515 | 515 |
| AGFG1     | -0.00951 | 0.829579 | 0.883557 | 515 | 515 |
| CAPNS2    | -0.00951 | 0.829582 | 0.883557 | 515 | 434 |
| FAM84B    | -0.00951 | 0.829583 | 0.883557 | 515 | 515 |
| RPL13A    | -0.0095  | 0.829637 | 0.883567 | 515 | 515 |
| TCEA2     | -0.0095  | 0.829772 | 0.883664 | 515 | 515 |
| SLC6A17   | -0.00949 | 0.829898 | 0.883751 | 515 | 493 |
| C21orf90  | -0.00949 | 0.829953 | 0.883762 | 515 | 399 |
| TLL6      | -0.00946 | 0.830399 | 0.884096 | 515 | 482 |
| OR2A4     | -0.00945 | 0.830595 | 0.884231 | 515 | 514 |
| NEUROG1   | -0.00945 | 0.830615 | 0.884231 | 515 | 13  |
| PTRH1     | -0.0094  | 0.831421 | 0.884854 | 515 | 515 |
| DDX28     | -0.0094  | 0.831518 | 0.88491  | 515 | 515 |
| C5orf32   | -0.00937 | 0.831986 | 0.885314 | 515 | 515 |
| MRPL4     | -0.00936 | 0.832183 | 0.885477 | 515 | 515 |
| SNTB1     | -0.00934 | 0.83254  | 0.885717 | 515 | 515 |
| ACOT11    | -0.00934 | 0.832542 | 0.885717 | 515 | 515 |
| C19orf20  | -0.00932 | 0.832813 | 0.88591  | 515 | 515 |
| TMEM106B  | -0.00928 | 0.833627 | 0.88652  | 515 | 515 |
| WDR88     | -0.00927 | 0.833806 | 0.886542 | 515 | 505 |
| HUS1      | -0.00923 | 0.834532 | 0.887111 | 515 | 515 |
| CNTD1     | -0.00923 | 0.834562 | 0.887111 | 515 | 515 |
| PMS1      | -0.00922 | 0.834685 | 0.887158 | 515 | 515 |
| BAG5      | -0.00922 | 0.834696 | 0.887158 | 515 | 515 |
| ITIH2     | -0.00921 | 0.834909 | 0.887306 | 515 | 474 |
| KCNJ14    | -0.0092  | 0.835032 | 0.887327 | 515 | 515 |
| LOC150568 | -0.00913 | 0.836224 | 0.888404 | 515 | 62  |
| CMC1      | -0.00912 | 0.836338 | 0.888479 | 515 | 515 |
| GPC5      | -0.00908 | 0.837133 | 0.889272 | 515 | 489 |
| CDH22     | -0.00907 | 0.837254 | 0.889309 | 515 | 345 |
| FAM106C   | -0.00907 | 0.837395 | 0.889412 | 515 | 462 |



|           |          |          |          |     |     |
|-----------|----------|----------|----------|-----|-----|
| FAM108B1  | -0.00906 | 0.837501 | 0.889477 | 515 | 515 |
| DIS3      | -0.00903 | 0.837986 | 0.889851 | 515 | 515 |
| HIGD1C    | -0.00902 | 0.838271 | 0.890036 | 515 | 11  |
| CHEK2     | -0.00897 | 0.839038 | 0.890587 | 515 | 515 |
| ZNF576    | -0.00893 | 0.839708 | 0.89108  | 515 | 515 |
| ZKSCAN5   | -0.00893 | 0.839723 | 0.89108  | 515 | 515 |
| CEACAM19  | -0.00892 | 0.839996 | 0.891322 | 515 | 515 |
| UBQLN2    | -0.0089  | 0.840345 | 0.891645 | 515 | 515 |
| FLJ40852  | -0.00885 | 0.841216 | 0.89238  | 515 | 515 |
| GPR152    | -0.00884 | 0.841398 | 0.892526 | 515 | 390 |
| IL1RAPL2  | -0.00883 | 0.841597 | 0.89267  | 515 | 374 |
| PLEKHA7   | -0.00881 | 0.84193  | 0.892948 | 515 | 515 |
| MORC1     | -0.0088  | 0.842018 | 0.892993 | 515 | 87  |
| C1orf100  | -0.00877 | 0.84263  | 0.893548 | 515 | 52  |
| FIS1      | -0.00877 | 0.8427   | 0.893575 | 515 | 515 |
| UBE2DNL   | -0.00874 | 0.843194 | 0.894004 | 515 | 18  |
| USH2A     | -0.00872 | 0.843508 | 0.894289 | 515 | 472 |
| GOLGA6D   | -0.00871 | 0.843654 | 0.894397 | 515 | 32  |
| MRPS23    | -0.00869 | 0.844098 | 0.894725 | 515 | 515 |
| TUBB1     | -0.00867 | 0.844309 | 0.894901 | 515 | 515 |
| TAAR1     | -0.00867 | 0.844363 | 0.894911 | 515 | 114 |
| C14orf128 | -0.00864 | 0.844865 | 0.895291 | 515 | 515 |
| LYSMD4    | -0.00864 | 0.844936 | 0.895291 | 515 | 515 |
| ANKHD1-EI | -0.00858 | 0.845935 | 0.896202 | 515 | 515 |
| SPINK8    | -0.00858 | 0.84594  | 0.896202 | 515 | 42  |
| SCN9A     | -0.00857 | 0.846098 | 0.896227 | 515 | 515 |
| DPF1      | -0.00857 | 0.846153 | 0.896238 | 515 | 477 |
| C7orf70   | -0.00856 | 0.846332 | 0.89638  | 515 | 515 |
| CACNB2    | -0.00855 | 0.846515 | 0.896526 | 515 | 515 |
| DDIT3     | -0.00854 | 0.846619 | 0.896577 | 515 | 515 |
| FOXR2     | -0.00854 | 0.846782 | 0.896666 | 515 | 41  |
| ARHGAP5   | -0.00852 | 0.847009 | 0.896789 | 515 | 515 |
| C9orf16   | -0.00851 | 0.847197 | 0.896836 | 515 | 515 |
| DEFA1B    | -0.0085  | 0.847323 | 0.896907 | 515 | 318 |
| POLR2J3   | -0.0085  | 0.84749  | 0.897037 | 515 | 515 |
| H2BFWT    | -0.00848 | 0.84778  | 0.897295 | 515 | 66  |
| DPY19L2P4 | -0.00846 | 0.848071 | 0.897508 | 515 | 405 |
| BTD       | -0.00844 | 0.848424 | 0.897787 | 515 | 515 |
| TNRC6C    | -0.00842 | 0.84887  | 0.898038 | 515 | 515 |
| CGB8      | -0.00842 | 0.848904 | 0.898038 | 515 | 167 |
| C22orf33  | -0.00841 | 0.848959 | 0.898038 | 515 | 30  |
| MC1R      | -0.00841 | 0.849021 | 0.898038 | 515 | 515 |
| ATHL1     | -0.0084  | 0.849136 | 0.898112 | 515 | 515 |
| OPA3      | -0.00839 | 0.84932  | 0.898225 | 515 | 515 |
| PSME3     | -0.00839 | 0.849364 | 0.898225 | 515 | 515 |
| PLCG1     | -0.00839 | 0.849377 | 0.898225 | 515 | 515 |
| MBTPS2    | -0.00837 | 0.849747 | 0.898568 | 515 | 515 |
| INO80     | -0.00835 | 0.850011 | 0.898642 | 515 | 515 |
| SPANXN3   | -0.00835 | 0.850093 | 0.898642 | 515 | 44  |
| CLCN1     | -0.00835 | 0.850097 | 0.898642 | 515 | 397 |
| HSD17B13  | -0.00835 | 0.850131 | 0.898642 | 515 | 514 |
| DLGAP1    | -0.0083  | 0.850917 | 0.899187 | 515 | 486 |
| KDELR3    | -0.00829 | 0.851151 | 0.89934  | 515 | 515 |
| MGC14436  | -0.00828 | 0.851306 | 0.899456 | 515 | 417 |

|           |          |          |          |     |     |
|-----------|----------|----------|----------|-----|-----|
| RAD21L1   | -0.00824 | 0.852065 | 0.900067 | 515 | 153 |
| MOGAT1    | -0.00822 | 0.852437 | 0.900413 | 515 | 175 |
| OR52E8    | -0.00821 | 0.852486 | 0.900417 | 515 | 4   |
| CYP4Z1    | -0.00817 | 0.853233 | 0.901035 | 515 | 431 |
| LDHC      | -0.00817 | 0.853251 | 0.901035 | 515 | 360 |
| CAB39L    | -0.00809 | 0.854675 | 0.902299 | 515 | 515 |
| SLC2A7    | -0.00809 | 0.854761 | 0.902343 | 515 | 147 |
| LOC100170 | -0.00804 | 0.85557  | 0.903006 | 515 | 513 |
| C4orf19   | -0.00802 | 0.855958 | 0.903272 | 515 | 514 |
| HSPG2     | -0.008   | 0.856262 | 0.903546 | 515 | 515 |
| FRG2C     | -0.00797 | 0.85688  | 0.904007 | 515 | 268 |
| NAPB      | -0.00794 | 0.857348 | 0.904358 | 515 | 515 |
| PRAMEF20  | -0.00793 | 0.857528 | 0.904496 | 515 | 18  |
| LRRC28    | -0.00792 | 0.857615 | 0.904496 | 515 | 515 |
| SSBP4     | -0.00792 | 0.857771 | 0.904612 | 515 | 515 |
| GTF2IRD2E | -0.0079  | 0.858016 | 0.904776 | 515 | 515 |
| SNORA50   | -0.00787 | 0.858516 | 0.905208 | 515 | 8   |
| CCDC123   | -0.00787 | 0.858659 | 0.90531  | 515 | 515 |
| C13orf39  | -0.00786 | 0.85885  | 0.905371 | 515 | 197 |
| METTL2A   | -0.00784 | 0.859107 | 0.905577 | 515 | 515 |
| SNORA10   | -0.00784 | 0.859138 | 0.905577 | 515 | 104 |
| C16orf73  | -0.00783 | 0.859367 | 0.905682 | 515 | 327 |
| GSTM4     | -0.00782 | 0.859419 | 0.905682 | 515 | 515 |
| DSG2      | -0.0078  | 0.859757 | 0.905752 | 515 | 515 |
| KIF26B    | -0.00779 | 0.859962 | 0.905872 | 515 | 515 |
| LDLRAD1   | -0.00778 | 0.860265 | 0.906143 | 515 | 466 |
| GNG4      | -0.00776 | 0.860583 | 0.90643  | 515 | 512 |
| TMPRSS2   | -0.00775 | 0.860668 | 0.906448 | 515 | 515 |
| GATC      | -0.00775 | 0.860721 | 0.906448 | 515 | 515 |
| BEST2     | -0.00774 | 0.860853 | 0.906524 | 515 | 165 |
| AQPEP     | -0.00773 | 0.861052 | 0.906638 | 515 | 465 |
| GRIK2     | -0.00772 | 0.861191 | 0.906707 | 515 | 494 |
| MMP26     | -0.00772 | 0.861284 | 0.906739 | 515 | 28  |
| AACSL     | -0.00766 | 0.862303 | 0.907513 | 515 | 339 |
| OTOS      | -0.00766 | 0.862337 | 0.907513 | 515 | 103 |
| DHRS7C    | -0.0076  | 0.86334  | 0.908329 | 515 | 10  |
| TAS2R20   | -0.00759 | 0.86365  | 0.908464 | 515 | 515 |
| RANBP10   | -0.00757 | 0.864015 | 0.908704 | 515 | 515 |
| GAD2      | -0.00755 | 0.864273 | 0.908881 | 515 | 40  |
| ALDH2     | -0.00753 | 0.864559 | 0.909045 | 515 | 515 |
| CCDC104   | -0.00753 | 0.864601 | 0.909045 | 515 | 515 |
| SMR3B     | -0.00752 | 0.864873 | 0.909225 | 515 | 27  |
| IQCF3     | -0.00751 | 0.865039 | 0.909351 | 515 | 29  |
| PRR4      | -0.0075  | 0.865151 | 0.909373 | 515 | 515 |
| SAR1A     | -0.0075  | 0.865219 | 0.909396 | 515 | 515 |
| C19orf36  | -0.00748 | 0.865562 | 0.909662 | 515 | 514 |
| GUSBL1    | -0.00743 | 0.866338 | 0.91029  | 515 | 515 |
| SCARNA18  | -0.00743 | 0.866342 | 0.91029  | 515 | 8   |
| PRH1      | -0.00743 | 0.866461 | 0.910346 | 515 | 515 |
| TUBA1C    | -0.00742 | 0.866539 | 0.910346 | 515 | 515 |
| C5orf55   | -0.00742 | 0.866565 | 0.910346 | 515 | 515 |
| PCNA      | -0.00741 | 0.866734 | 0.910463 | 515 | 515 |
| LRP8      | -0.0074  | 0.866982 | 0.91058  | 515 | 515 |
| C8orf58   | -0.00739 | 0.867142 | 0.9107   | 515 | 515 |

|           |          |          |          |     |     |
|-----------|----------|----------|----------|-----|-----|
| SGSH      | -0.00738 | 0.867234 | 0.910748 | 515 | 515 |
| HPS4      | -0.00735 | 0.867759 | 0.911203 | 515 | 515 |
| PIK3R4    | -0.00735 | 0.867804 | 0.911203 | 515 | 515 |
| HIST1H3G  | -0.00732 | 0.868408 | 0.911694 | 515 | 358 |
| RABGGTB   | -0.00731 | 0.868631 | 0.91188  | 515 | 515 |
| ZNF22     | -0.0073  | 0.868773 | 0.911922 | 515 | 515 |
| FOXD1     | -0.0073  | 0.868784 | 0.911922 | 515 | 498 |
| TCAP      | -0.00727 | 0.86927  | 0.912334 | 515 | 505 |
| GLRA1     | -0.00726 | 0.869533 | 0.91254  | 515 | 76  |
| FAM123B   | -0.00722 | 0.870161 | 0.913103 | 515 | 515 |
| UHRF1     | -0.00719 | 0.870671 | 0.913542 | 515 | 515 |
| LOC645752 | -0.00718 | 0.870905 | 0.91374  | 515 | 269 |
| TINAGL1   | -0.00716 | 0.871286 | 0.914043 | 515 | 515 |
| ANXA11    | -0.00714 | 0.871518 | 0.914238 | 515 | 515 |
| QPCTL     | -0.00714 | 0.871654 | 0.914299 | 515 | 515 |
| DPRX      | -0.00714 | 0.871667 | 0.914299 | 515 | 45  |
| EP400NL   | -0.00712 | 0.871936 | 0.914533 | 515 | 515 |
| SNORA59B  | -0.00712 | 0.872007 | 0.91456  | 515 | 150 |
| STYXL1    | -0.00711 | 0.872098 | 0.914607 | 515 | 515 |
| NUP160    | -0.0071  | 0.872391 | 0.914818 | 515 | 515 |
| ASRGL1    | -0.00708 | 0.87263  | 0.91502  | 515 | 515 |
| OR2A5     | -0.00708 | 0.872721 | 0.91502  | 515 | 21  |
| KCNG3     | -0.00706 | 0.872991 | 0.915207 | 515 | 500 |
| DPY19L3   | -0.00704 | 0.873427 | 0.915495 | 515 | 515 |
| C9orf4    | -0.00703 | 0.873522 | 0.915495 | 515 | 143 |
| CCDC134   | -0.00703 | 0.873574 | 0.915495 | 515 | 515 |
| ACSM4     | -0.00701 | 0.873837 | 0.915662 | 515 | 55  |
| TNP01     | -0.00701 | 0.873921 | 0.915664 | 515 | 515 |
| PCMTD1    | -0.00699 | 0.874302 | 0.915813 | 515 | 515 |
| EML5      | -0.00695 | 0.874905 | 0.916349 | 515 | 515 |
| KCNV2     | -0.00692 | 0.875527 | 0.916678 | 515 | 349 |
| SLC39A3   | -0.00692 | 0.87554  | 0.916678 | 515 | 515 |
| KRIT1     | -0.00691 | 0.875766 | 0.916767 | 515 | 515 |
| SLC39A13  | -0.0069  | 0.875914 | 0.916781 | 515 | 515 |
| CCDC150   | -0.00689 | 0.876058 | 0.916827 | 515 | 514 |
| C7orf49   | -0.00689 | 0.876096 | 0.916827 | 515 | 515 |
| RNF32     | -0.00687 | 0.876342 | 0.916989 | 515 | 515 |
| TNP2      | -0.00685 | 0.87671  | 0.917182 | 515 | 9   |
| LDHB      | -0.00684 | 0.876902 | 0.917335 | 515 | 515 |
| NHEG1     | -0.00681 | 0.877405 | 0.917688 | 515 | 45  |
| DUT       | -0.00681 | 0.877442 | 0.917688 | 515 | 515 |
| PRB4      | -0.00677 | 0.878117 | 0.918173 | 515 | 54  |
| REG3A     | -0.00675 | 0.878557 | 0.918526 | 515 | 57  |
| NAA20     | -0.00675 | 0.878571 | 0.918526 | 515 | 515 |
| CNTNAP2   | -0.00669 | 0.879677 | 0.919433 | 515 | 505 |
| PRPF18    | -0.00668 | 0.879716 | 0.919433 | 515 | 515 |
| EPX       | -0.00668 | 0.87979  | 0.919433 | 515 | 394 |
| GALR2     | -0.00664 | 0.880517 | 0.920103 | 515 | 465 |
| AP3B2     | -0.00663 | 0.880636 | 0.920133 | 515 | 492 |
| FGFR2     | -0.00662 | 0.880835 | 0.920293 | 515 | 515 |
| ZNF498    | -0.00662 | 0.880898 | 0.920311 | 515 | 515 |
| LOC127841 | -0.00661 | 0.880998 | 0.920348 | 515 | 405 |
| TNP1      | -0.00661 | 0.881026 | 0.920348 | 515 | 16  |
| C9orf53   | -0.00659 | 0.881437 | 0.920699 | 515 | 220 |

|           |          |          |          |     |     |
|-----------|----------|----------|----------|-----|-----|
| SNORA3    | -0.00659 | 0.88149  | 0.920699 | 515 | 38  |
| KIAA1143  | -0.00658 | 0.881567 | 0.920721 | 515 | 515 |
| OR2G2     | -0.00654 | 0.882228 | 0.921219 | 515 | 7   |
| ASB15     | -0.00653 | 0.882398 | 0.9213   | 515 | 44  |
| DOK7      | -0.00651 | 0.882895 | 0.921675 | 515 | 510 |
| PSMC1     | -0.00649 | 0.883262 | 0.921893 | 515 | 515 |
| AQP12B    | -0.00648 | 0.883452 | 0.921967 | 515 | 192 |
| ZNF581    | -0.00646 | 0.883666 | 0.922142 | 515 | 515 |
| TYRO3     | -0.00645 | 0.883913 | 0.922303 | 515 | 515 |
| HTR3E     | -0.00643 | 0.884212 | 0.922568 | 515 | 139 |
| OR4N2     | -0.00642 | 0.884436 | 0.922754 | 515 | 19  |
| CXorf64   | -0.00642 | 0.884497 | 0.922769 | 515 | 297 |
| NPBWR2    | -0.00641 | 0.884645 | 0.922875 | 515 | 23  |
| FAM5B     | -0.0064  | 0.884883 | 0.923075 | 515 | 403 |
| ARHGAP21  | -0.00638 | 0.88516  | 0.923267 | 515 | 515 |
| SCGB2A2   | -0.00637 | 0.885321 | 0.923351 | 515 | 40  |
| SF3A3     | -0.00636 | 0.885427 | 0.923382 | 515 | 515 |
| EYA4      | -0.00636 | 0.885483 | 0.923382 | 515 | 509 |
| FAM182B   | -0.00633 | 0.885971 | 0.923776 | 515 | 514 |
| PRKACG    | -0.00633 | 0.886052 | 0.923794 | 515 | 86  |
| CCDC144C  | -0.00632 | 0.886231 | 0.923903 | 515 | 321 |
| TRIM4     | -0.0063  | 0.886554 | 0.924143 | 515 | 515 |
| ATXN1L    | -0.00628 | 0.886892 | 0.924399 | 515 | 515 |
| SAGE1     | -0.00625 | 0.887408 | 0.924841 | 515 | 198 |
| FABP2     | -0.00624 | 0.887623 | 0.925016 | 515 | 163 |
| RPL38     | -0.00619 | 0.888534 | 0.925632 | 515 | 515 |
| TMEM133   | -0.00616 | 0.889063 | 0.926082 | 515 | 515 |
| MAGEB4    | -0.00614 | 0.889372 | 0.926355 | 515 | 25  |
| ATP6VOB   | -0.00613 | 0.889699 | 0.926599 | 515 | 515 |
| NSD1      | -0.00612 | 0.88988  | 0.926692 | 515 | 515 |
| UBE2I     | -0.00609 | 0.890406 | 0.927143 | 515 | 515 |
| GTF3C3    | -0.00607 | 0.890705 | 0.927334 | 515 | 515 |
| MADD      | -0.00603 | 0.891348 | 0.92793  | 515 | 515 |
| SLC7A13   | -0.00601 | 0.891734 | 0.928154 | 515 | 32  |
| BCKDK     | -0.006   | 0.891886 | 0.928205 | 515 | 515 |
| REG1B     | -0.006   | 0.891891 | 0.928205 | 515 | 43  |
| SLC12A7   | -0.006   | 0.892014 | 0.928237 | 515 | 515 |
| CSAD      | -0.00598 | 0.892302 | 0.928455 | 515 | 515 |
| RBMX2     | -0.00598 | 0.892316 | 0.928455 | 515 | 515 |
| CD9       | -0.00597 | 0.89241  | 0.928456 | 515 | 515 |
| C1orf151  | -0.00596 | 0.892584 | 0.928588 | 515 | 515 |
| LOC100128 | -0.00594 | 0.893058 | 0.928985 | 515 | 7   |
| SNORD1C   | -0.00592 | 0.893424 | 0.929262 | 515 | 515 |
| SRP54     | -0.00591 | 0.893497 | 0.929262 | 515 | 515 |
| RIC8A     | -0.00591 | 0.893601 | 0.929308 | 515 | 515 |
| KIN       | -0.00579 | 0.895745 | 0.931246 | 515 | 515 |
| ZNF645    | -0.00578 | 0.895968 | 0.93143  | 515 | 40  |
| HIST1H2BM | -0.00576 | 0.896185 | 0.931559 | 515 | 217 |
| NR1H2     | -0.00576 | 0.896237 | 0.931563 | 515 | 515 |
| POLA1     | -0.00576 | 0.896282 | 0.931563 | 515 | 515 |
| POLR2G    | -0.00575 | 0.896439 | 0.931678 | 515 | 515 |
| PSMD9     | -0.00574 | 0.896686 | 0.931788 | 515 | 515 |
| HPCAL1    | -0.00573 | 0.896786 | 0.931794 | 515 | 515 |
| B3GNT7    | -0.00572 | 0.896945 | 0.931865 | 515 | 515 |

|           |          |          |          |     |     |
|-----------|----------|----------|----------|-----|-----|
| ATP6V1G3  | -0.0057  | 0.89726  | 0.931984 | 515 | 59  |
| NDUFA13   | -0.0057  | 0.897264 | 0.931984 | 515 | 515 |
| STAM2     | -0.0057  | 0.897294 | 0.931984 | 515 | 515 |
| MAGEB6    | -0.00568 | 0.897635 | 0.932291 | 515 | 117 |
| CYP2B7P1  | -0.00566 | 0.898117 | 0.932653 | 515 | 515 |
| ZNF534    | -0.00565 | 0.898266 | 0.932751 | 515 | 510 |
| FRG2B     | -0.00563 | 0.898639 | 0.932993 | 515 | 172 |
| PLSCR2    | -0.00561 | 0.898991 | 0.93331  | 515 | 382 |
| KIAA1147  | -0.0056  | 0.899198 | 0.933478 | 515 | 515 |
| C14orf33  | -0.00559 | 0.899359 | 0.933551 | 515 | 515 |
| NCRNA0008 | -0.00559 | 0.899375 | 0.933551 | 515 | 515 |
| WNK1      | -0.00558 | 0.89941  | 0.933551 | 515 | 515 |
| USH1G     | -0.00554 | 0.900188 | 0.934074 | 515 | 388 |
| LOC286094 | -0.00552 | 0.900545 | 0.934293 | 515 | 65  |
| APTX      | -0.00552 | 0.900608 | 0.93431  | 515 | 515 |
| PLIN4     | -0.00551 | 0.900757 | 0.934416 | 515 | 515 |
| STEAP4    | -0.0055  | 0.900935 | 0.934553 | 515 | 515 |
| CTSA      | -0.00547 | 0.901409 | 0.934899 | 515 | 515 |
| UXS1      | -0.00544 | 0.901944 | 0.935259 | 515 | 515 |
| PCDHA3    | -0.00543 | 0.902199 | 0.93533  | 515 | 508 |
| C8orf41   | -0.00541 | 0.902567 | 0.935663 | 515 | 515 |
| NMUR2     | -0.0054  | 0.902763 | 0.935698 | 515 | 376 |
| FAU       | -0.0054  | 0.902779 | 0.935698 | 515 | 515 |
| ALG10B    | -0.00537 | 0.90332  | 0.936061 | 515 | 515 |
| DPPA5     | -0.00537 | 0.903326 | 0.936061 | 515 | 50  |
| APOOL     | -0.00536 | 0.903438 | 0.936129 | 515 | 515 |
| POPDC3    | -0.00527 | 0.904994 | 0.937303 | 515 | 469 |
| MAPK8IP2  | -0.00526 | 0.905153 | 0.93742  | 515 | 515 |
| CC2D2A    | -0.00526 | 0.905216 | 0.937436 | 515 | 515 |
| OR5AU1    | -0.00525 | 0.905397 | 0.937575 | 515 | 85  |
| SMAD5     | -0.00522 | 0.905963 | 0.938016 | 515 | 515 |
| KCTD6     | -0.00521 | 0.90612  | 0.93813  | 515 | 515 |
| RFPL3S    | -0.0052  | 0.906202 | 0.938166 | 515 | 499 |
| DGKI      | -0.0052  | 0.906315 | 0.938234 | 515 | 491 |
| C2orf48   | -0.00518 | 0.906731 | 0.938487 | 515 | 501 |
| DAPK3     | -0.00517 | 0.906912 | 0.938609 | 515 | 515 |
| TDH       | -0.00514 | 0.907448 | 0.938921 | 515 | 353 |
| OR52E4    | -0.00511 | 0.907856 | 0.939198 | 515 | 23  |
| LOC646851 | -0.00509 | 0.908177 | 0.939301 | 515 | 515 |
| XIAP      | -0.00509 | 0.908324 | 0.939389 | 515 | 515 |
| LOC728643 | -0.00507 | 0.908554 | 0.939481 | 515 | 515 |
| DSN1      | -0.00507 | 0.908554 | 0.939481 | 515 | 515 |
| C1QL1     | -0.00507 | 0.908703 | 0.939514 | 515 | 487 |
| ZPBP      | -0.00506 | 0.908773 | 0.939514 | 515 | 82  |
| SNORA74A  | -0.00505 | 0.909038 | 0.93969  | 515 | 130 |
| ERLEC1    | -0.00504 | 0.909161 | 0.939725 | 515 | 515 |
| USP6NL    | -0.00504 | 0.909166 | 0.939725 | 515 | 515 |
| BAHD1     | -0.00503 | 0.909257 | 0.93977  | 515 | 515 |
| BAZ2A     | -0.00502 | 0.909545 | 0.94002  | 515 | 515 |
| MFSD5     | -0.00499 | 0.910008 | 0.940255 | 515 | 515 |
| KRTAP2-1  | -0.00493 | 0.911207 | 0.9413   | 515 | 109 |
| GGTLC2    | -0.00491 | 0.91152  | 0.941486 | 515 | 515 |
| ANGPTL4   | -0.00485 | 0.91258  | 0.942231 | 515 | 515 |
| IMP5      | -0.00483 | 0.912907 | 0.942467 | 515 | 10  |

|           |          |          |          |     |     |
|-----------|----------|----------|----------|-----|-----|
| HIST1H2AA | -0.00483 | 0.912962 | 0.942467 | 515 | 15  |
| PXN       | -0.00483 | 0.912997 | 0.942467 | 515 | 515 |
| NFATC3    | -0.00482 | 0.913185 | 0.942612 | 515 | 515 |
| H3F3B     | -0.00479 | 0.913725 | 0.943072 | 515 | 515 |
| BOD1L     | -0.00478 | 0.913848 | 0.943146 | 515 | 515 |
| ACTL6B    | -0.00477 | 0.913938 | 0.943146 | 515 | 66  |
| NPY2R     | -0.00476 | 0.914115 | 0.943259 | 515 | 119 |
| UCN3      | -0.00474 | 0.914587 | 0.943572 | 515 | 429 |
| GRHL1     | -0.00472 | 0.914936 | 0.94369  | 515 | 515 |
| RPL24     | -0.00471 | 0.915073 | 0.943732 | 515 | 515 |
| SC4MOL    | -0.0047  | 0.9152   | 0.943815 | 515 | 515 |
| GRIN1     | -0.00469 | 0.915483 | 0.944009 | 515 | 505 |
| C14orf23  | -0.00463 | 0.916518 | 0.944882 | 515 | 65  |
| SDCCAG8   | -0.00461 | 0.916792 | 0.944946 | 515 | 515 |
| HIST1H3D  | -0.00461 | 0.916911 | 0.944946 | 515 | 488 |
| OPA1      | -0.00454 | 0.918103 | 0.945882 | 515 | 515 |
| MBD5      | -0.0045  | 0.918801 | 0.946545 | 515 | 515 |
| C14orf165 | -0.0045  | 0.918842 | 0.946545 | 515 | 12  |
| TCP11     | -0.00449 | 0.919031 | 0.946642 | 515 | 427 |
| FAM58B    | -0.00448 | 0.919225 | 0.946793 | 515 | 242 |
| LRRC43    | -0.00445 | 0.919811 | 0.947299 | 515 | 513 |
| LRRC14B   | -0.00444 | 0.919976 | 0.947421 | 515 | 333 |
| PTER      | -0.00443 | 0.920107 | 0.947506 | 515 | 515 |
| MGMT      | -0.0044  | 0.920622 | 0.947939 | 515 | 515 |
| FRMPD2    | -0.0044  | 0.920715 | 0.947986 | 515 | 381 |
| NFAT5     | -0.00439 | 0.920795 | 0.94802  | 515 | 515 |
| NBLA00301 | -0.00436 | 0.92129  | 0.948432 | 515 | 192 |
| NEK5      | -0.00434 | 0.921663 | 0.948669 | 515 | 457 |
| ACTRT2    | -0.00434 | 0.921733 | 0.948692 | 515 | 14  |
| DUSP28    | -0.00432 | 0.922033 | 0.948952 | 515 | 515 |
| CELP      | -0.00432 | 0.922094 | 0.948965 | 515 | 91  |
| LOC81691  | -0.00431 | 0.922282 | 0.949088 | 515 | 515 |
| FAM40A    | -0.00431 | 0.922333 | 0.949088 | 515 | 515 |
| P4HA3     | -0.00426 | 0.923088 | 0.949598 | 515 | 515 |
| AMOT      | -0.00425 | 0.923268 | 0.949679 | 515 | 515 |
| KRT24     | -0.00425 | 0.923286 | 0.949679 | 515 | 223 |
| TAS2R19   | -0.00425 | 0.923374 | 0.949679 | 515 | 398 |
| CSH1      | -0.00425 | 0.923405 | 0.949679 | 515 | 9   |
| HRNBP3    | -0.00421 | 0.924014 | 0.950049 | 515 | 421 |
| KY        | -0.00421 | 0.924049 | 0.950049 | 515 | 493 |
| SLC35F2   | -0.00412 | 0.925649 | 0.951592 | 515 | 515 |
| TFDP1     | -0.0041  | 0.926001 | 0.951712 | 515 | 515 |
| C3orf72   | -0.00409 | 0.926284 | 0.951929 | 515 | 252 |
| SLC22A9   | -0.00409 | 0.926306 | 0.951929 | 515 | 144 |
| IP6K1     | -0.00408 | 0.926403 | 0.951979 | 515 | 515 |
| GRK7      | -0.00408 | 0.926466 | 0.951995 | 515 | 330 |
| CPNE3     | -0.00403 | 0.927271 | 0.952719 | 515 | 515 |
| C21orf81  | -0.00403 | 0.927314 | 0.952719 | 515 | 414 |
| SLC10A3   | -0.00402 | 0.927501 | 0.952814 | 515 | 515 |
| AP3M1     | -0.004   | 0.927763 | 0.953034 | 515 | 515 |
| POU4F3    | -0.004   | 0.927892 | 0.953117 | 515 | 372 |
| NOVA1     | -0.00399 | 0.928088 | 0.95327  | 515 | 511 |
| RPS15     | -0.00397 | 0.928418 | 0.95356  | 515 | 515 |
| ARAF      | -0.00395 | 0.928735 | 0.95374  | 515 | 515 |

|           |          |          |          |     |     |
|-----------|----------|----------|----------|-----|-----|
| LOC285847 | -0.00394 | 0.928872 | 0.95379  | 515 | 258 |
| BNIP3L    | -0.00394 | 0.928881 | 0.95379  | 515 | 515 |
| LRRC6     | -0.00392 | 0.929319 | 0.954171 | 515 | 514 |
| TGM3      | -0.00391 | 0.929521 | 0.954299 | 515 | 435 |
| LBR       | -0.00389 | 0.929807 | 0.954488 | 515 | 515 |
| MAGOH     | -0.00389 | 0.929825 | 0.954488 | 515 | 515 |
| MGAT4B    | -0.00389 | 0.929911 | 0.954504 | 515 | 515 |
| SP011     | -0.00388 | 0.930024 | 0.954571 | 515 | 8   |
| FST       | -0.00386 | 0.930329 | 0.954835 | 515 | 512 |
| DBF4B     | -0.00385 | 0.930549 | 0.955012 | 515 | 515 |
| DHDDS     | -0.00384 | 0.93077  | 0.955092 | 515 | 515 |
| PROCA1    | -0.00381 | 0.931237 | 0.955336 | 515 | 515 |
| LOC441208 | -0.00381 | 0.931247 | 0.955336 | 515 | 515 |
| C1orf133  | -0.0038  | 0.93146  | 0.955407 | 515 | 514 |
| LSG1      | -0.00368 | 0.933599 | 0.95711  | 515 | 515 |
| CYP4F8    | -0.00367 | 0.933703 | 0.957167 | 515 | 68  |
| SRBD1     | -0.00364 | 0.934289 | 0.957532 | 515 | 515 |
| ARHGEF2   | -0.00364 | 0.934298 | 0.957532 | 515 | 515 |
| DDX18     | -0.00363 | 0.934481 | 0.957567 | 515 | 515 |
| VANGL2    | -0.00363 | 0.934523 | 0.957567 | 515 | 515 |
| PLCD4     | -0.00363 | 0.934524 | 0.957567 | 515 | 515 |
| YJEFN3    | -0.00361 | 0.934831 | 0.957833 | 515 | 505 |
| SNORA47   | -0.0036  | 0.934996 | 0.957953 | 515 | 29  |
| DCDC1     | -0.00356 | 0.935783 | 0.958661 | 515 | 365 |
| LIN37     | -0.00355 | 0.935957 | 0.958727 | 515 | 515 |
| HTR3D     | -0.00354 | 0.93605  | 0.958738 | 515 | 33  |
| LOC255167 | -0.00353 | 0.936242 | 0.958885 | 515 | 506 |
| SNORA57   | -0.00353 | 0.936313 | 0.958901 | 515 | 282 |
| CPOX      | -0.00349 | 0.937001 | 0.959381 | 515 | 515 |
| FIGN      | -0.00349 | 0.937043 | 0.959381 | 515 | 515 |
| C4orf37   | -0.00348 | 0.937179 | 0.959381 | 515 | 329 |
| CASK      | -0.00348 | 0.937191 | 0.959381 | 515 | 515 |
| LPCAT3    | -0.00345 | 0.937732 | 0.959821 | 515 | 515 |
| SPDYE8P   | -0.00343 | 0.938134 | 0.960085 | 515 | 515 |
| REXO1L1   | -0.0034  | 0.938594 | 0.96045  | 515 | 36  |
| PSENN     | -0.0034  | 0.938635 | 0.96045  | 515 | 515 |
| JMY       | -0.00337 | 0.93914  | 0.960718 | 515 | 515 |
| SEC62     | -0.00334 | 0.939662 | 0.961157 | 515 | 515 |
| LSM12     | -0.00333 | 0.939907 | 0.961304 | 515 | 515 |
| THUMPD3   | -0.00332 | 0.940156 | 0.961466 | 515 | 515 |
| CLDN19    | -0.00331 | 0.940286 | 0.961472 | 515 | 219 |
| MRPL13    | -0.00331 | 0.940307 | 0.961472 | 515 | 515 |
| PEF1      | -0.0033  | 0.940455 | 0.961574 | 515 | 515 |
| FAM105A   | -0.00329 | 0.940699 | 0.961725 | 515 | 515 |
| PCDH10    | -0.00327 | 0.940985 | 0.961821 | 515 | 481 |
| SCGB1D1   | -0.00323 | 0.941779 | 0.962387 | 515 | 9   |
| LCE3E     | -0.0032  | 0.94224  | 0.96271  | 515 | 48  |
| LAPTM4A   | -0.0032  | 0.942335 | 0.962758 | 515 | 515 |
| GALNT14   | -0.00318 | 0.942575 | 0.962954 | 515 | 515 |
| MORF4L1   | -0.00317 | 0.942827 | 0.963113 | 515 | 515 |
| ACSS2     | -0.00315 | 0.943084 | 0.963193 | 515 | 515 |
| FTMT      | -0.00312 | 0.943622 | 0.96358  | 515 | 7   |
| HIST1H2BH | -0.00311 | 0.943846 | 0.963759 | 515 | 458 |
| RDH11     | -0.00308 | 0.944426 | 0.964162 | 515 | 515 |

|           |          |          |          |     |     |
|-----------|----------|----------|----------|-----|-----|
| RPS15AP10 | -0.00308 | 0.944479 | 0.964162 | 515 | 495 |
| ZNF337    | -0.00308 | 0.944481 | 0.964162 | 515 | 515 |
| KDM3A     | -0.00307 | 0.944561 | 0.964194 | 515 | 515 |
| ZNF195    | -0.00305 | 0.945009 | 0.964553 | 515 | 515 |
| FAM98C    | -0.00303 | 0.945386 | 0.964764 | 515 | 515 |
| KRT222    | -0.00299 | 0.946041 | 0.965262 | 515 | 515 |
| LRRFIP2   | -0.00298 | 0.946285 | 0.965461 | 515 | 515 |
| TRMT2B    | -0.00297 | 0.946397 | 0.965526 | 515 | 515 |
| C7orf71   | -0.00297 | 0.946479 | 0.965561 | 515 | 242 |
| CSMD3     | -0.00295 | 0.946787 | 0.965825 | 515 | 274 |
| A4GALT    | -0.00294 | 0.946948 | 0.965891 | 515 | 515 |
| METT11D1  | -0.0029  | 0.947647 | 0.966385 | 515 | 515 |
| SNORA45   | -0.00289 | 0.947748 | 0.966385 | 515 | 63  |
| NECAP1    | -0.00288 | 0.948022 | 0.966592 | 515 | 515 |
| C9orf91   | -0.00287 | 0.94815  | 0.966673 | 515 | 515 |
| SMOX      | -0.00287 | 0.948265 | 0.966741 | 515 | 515 |
| FAM9C     | -0.0028  | 0.949485 | 0.967824 | 515 | 209 |
| PPM1E     | -0.00279 | 0.949554 | 0.967824 | 515 | 513 |
| METTL9    | -0.00279 | 0.94957  | 0.967824 | 515 | 515 |
| LOC93432  | -0.00277 | 0.94997  | 0.968133 | 515 | 81  |
| BRPF1     | -0.00275 | 0.950305 | 0.968361 | 515 | 515 |
| APEX2     | -0.00275 | 0.950371 | 0.968361 | 515 | 515 |
| KCNH1     | -0.00274 | 0.950535 | 0.968462 | 515 | 505 |
| LRRC58    | -0.00271 | 0.951147 | 0.969036 | 515 | 515 |
| SPRYD3    | -0.00266 | 0.951997 | 0.969725 | 515 | 515 |
| KIAA0427  | -0.00266 | 0.952017 | 0.969725 | 515 | 515 |
| LOC730668 | -0.00265 | 0.952199 | 0.969776 | 515 | 480 |
| GGT3P     | -0.00265 | 0.952212 | 0.969776 | 515 | 515 |
| ERCC5     | -0.00264 | 0.952273 | 0.969787 | 515 | 515 |
| LCN1      | -0.00264 | 0.952337 | 0.969787 | 515 | 166 |
| DEFB118   | -0.00264 | 0.952369 | 0.969787 | 515 | 5   |
| LOC100190 | -0.00262 | 0.952698 | 0.970023 | 515 | 515 |
| CHST6     | -0.0026  | 0.953039 | 0.970222 | 515 | 515 |
| AQP7P3    | -0.00259 | 0.953203 | 0.970274 | 515 | 214 |
| TMEM132A  | -0.00259 | 0.953236 | 0.970274 | 515 | 515 |
| DNLZ      | -0.00258 | 0.953458 | 0.970452 | 515 | 515 |
| C14orf119 | -0.00256 | 0.953748 | 0.970697 | 515 | 515 |
| RTN4RL2   | -0.00255 | 0.954035 | 0.970888 | 515 | 515 |
| EME2      | -0.00254 | 0.954081 | 0.970888 | 515 | 510 |
| ZNF789    | -0.00254 | 0.954174 | 0.970933 | 515 | 515 |
| F13B      | -0.00249 | 0.955095 | 0.971573 | 515 | 61  |
| PROP1     | -0.00245 | 0.95584  | 0.972133 | 515 | 19  |
| LOC340074 | -0.00242 | 0.95627  | 0.972373 | 515 | 69  |
| NCRNA0010 | -0.00239 | 0.956811 | 0.972676 | 515 | 515 |
| SYNGR4    | -0.00237 | 0.957248 | 0.97307  | 515 | 456 |
| C17orf56  | -0.00235 | 0.957562 | 0.973291 | 515 | 515 |
| PRAMEF13  | -0.0023  | 0.958398 | 0.973829 | 515 | 10  |
| PKMYT1    | -0.0023  | 0.958531 | 0.973829 | 515 | 515 |
| DAD1      | -0.00229 | 0.958697 | 0.973949 | 515 | 515 |
| BEST3     | -0.00228 | 0.958788 | 0.973991 | 515 | 300 |
| TACSTD2   | -0.00222 | 0.959929 | 0.974953 | 515 | 515 |
| WDR75     | -0.0022  | 0.960218 | 0.975147 | 515 | 515 |
| RLIM      | -0.00219 | 0.960398 | 0.975181 | 515 | 515 |
| CHCHD3    | -0.00219 | 0.960496 | 0.975202 | 515 | 515 |



|           |          |          |          |     |     |
|-----------|----------|----------|----------|-----|-----|
| C9orf116  | -0.00219 | 0.960516 | 0.975202 | 515 | 515 |
| SLC13A5   | -0.00218 | 0.960723 | 0.975214 | 515 | 447 |
| UQCC      | -0.00216 | 0.960984 | 0.97538  | 515 | 515 |
| ETV3      | -0.00215 | 0.961111 | 0.975459 | 515 | 515 |
| CAMKV     | -0.00215 | 0.961167 | 0.975466 | 515 | 311 |
| BMP2      | -0.00212 | 0.961663 | 0.975777 | 515 | 515 |
| RRH       | -0.00209 | 0.962211 | 0.976205 | 515 | 444 |
| DOC2B     | -0.00206 | 0.962823 | 0.976701 | 515 | 497 |
| LOC401588 | -0.00205 | 0.962895 | 0.976723 | 515 | 515 |
| SULT1E1   | -0.00205 | 0.962944 | 0.976723 | 515 | 458 |
| THAP11    | -0.00203 | 0.963327 | 0.977014 | 515 | 515 |
| SLC6A15   | -0.00202 | 0.963511 | 0.97715  | 515 | 340 |
| C2orf55   | -0.00201 | 0.963631 | 0.977223 | 515 | 515 |
| GIYD2     | -0.002   | 0.963882 | 0.977427 | 515 | 515 |
| RPL7A     | -0.00199 | 0.964061 | 0.977524 | 515 | 515 |
| FAM133A   | -0.00197 | 0.964382 | 0.977662 | 515 | 436 |
| FOXJ1     | -0.00197 | 0.964406 | 0.977662 | 515 | 515 |
| IBTK      | -0.00195 | 0.964714 | 0.977874 | 515 | 515 |
| AHNAK2    | -0.00194 | 0.964905 | 0.978018 | 515 | 515 |
| HDDC2     | -0.00193 | 0.965125 | 0.978142 | 515 | 515 |
| GLDC      | -0.0019  | 0.965696 | 0.978622 | 515 | 515 |
| MRPL22    | -0.00184 | 0.966787 | 0.979384 | 515 | 515 |
| TCF12     | -0.00184 | 0.966791 | 0.979384 | 515 | 515 |
| ODF1      | -0.00182 | 0.967068 | 0.979541 | 515 | 105 |
| TSSK1B    | -0.00182 | 0.967094 | 0.979541 | 515 | 301 |
| PINK1     | -0.00182 | 0.967222 | 0.979622 | 515 | 515 |
| FAM27L    | -0.00181 | 0.967395 | 0.97973  | 515 | 9   |
| DMRTC1B   | -0.0018  | 0.967427 | 0.97973  | 515 | 486 |
| PREP      | -0.00178 | 0.967789 | 0.979997 | 515 | 515 |
| STC1      | -0.00177 | 0.968091 | 0.980204 | 515 | 515 |
| SSBP1     | -0.00174 | 0.968551 | 0.980557 | 515 | 515 |
| LOC254312 | -0.00174 | 0.968587 | 0.980557 | 515 | 12  |
| NDUFB7    | -0.00174 | 0.968646 | 0.980567 | 515 | 515 |
| OSTN      | -0.00173 | 0.968712 | 0.980584 | 515 | 41  |
| PNPLA4    | -0.00172 | 0.968967 | 0.980743 | 515 | 514 |
| TECTB     | -0.00163 | 0.970519 | 0.981992 | 515 | 30  |
| C16orf7   | -0.00163 | 0.970545 | 0.981992 | 515 | 515 |
| DNAJC27   | -0.00163 | 0.970647 | 0.98203  | 515 | 515 |
| CPSF4     | -0.00162 | 0.97068  | 0.98203  | 515 | 515 |
| KRTAP4-5  | -0.0016  | 0.971047 | 0.982351 | 515 | 11  |
| IL11      | -0.00159 | 0.971197 | 0.982453 | 515 | 514 |
| DEFA6     | -0.00157 | 0.971725 | 0.982838 | 515 | 24  |
| DOK4      | -0.00155 | 0.972035 | 0.983023 | 515 | 515 |
| MYT1L     | -0.00152 | 0.972634 | 0.983509 | 515 | 189 |
| C3orf66   | -0.00151 | 0.972818 | 0.983644 | 515 | 70  |
| OR10G4    | -0.00149 | 0.973083 | 0.983776 | 515 | 9   |
| EGFR      | -0.00148 | 0.973335 | 0.98395  | 515 | 515 |
| TOLLIP    | -0.00147 | 0.973366 | 0.98395  | 515 | 515 |
| POLD1     | -0.00147 | 0.973435 | 0.98397  | 515 | 515 |
| OR6C70    | -0.00143 | 0.974125 | 0.984568 | 515 | 23  |
| C1orf88   | -0.00143 | 0.974236 | 0.98463  | 515 | 515 |
| KDM4DL    | -0.00142 | 0.974434 | 0.98478  | 515 | 152 |
| POLR2C    | -0.00141 | 0.974597 | 0.984846 | 515 | 515 |
| PRPS1L1   | -0.00138 | 0.975157 | 0.985311 | 515 | 316 |

|           |          |          |          |     |     |
|-----------|----------|----------|----------|-----|-----|
| FAM99B    | -0.00137 | 0.975285 | 0.985385 | 515 | 6   |
| TSC1      | -0.00134 | 0.975734 | 0.985549 | 515 | 515 |
| SNORA6    | -0.00134 | 0.975736 | 0.985549 | 515 | 120 |
| CNDP1     | -0.00134 | 0.975826 | 0.985589 | 515 | 349 |
| LONRF1    | -0.00133 | 0.975995 | 0.98571  | 515 | 515 |
| DCD       | -0.00132 | 0.97613  | 0.985766 | 515 | 4   |
| RAB36     | -0.00131 | 0.976383 | 0.985903 | 515 | 515 |
| CDC20B    | -0.0013  | 0.976593 | 0.986015 | 515 | 441 |
| CHRNA4    | -0.00128 | 0.976805 | 0.98604  | 515 | 242 |
| FAM189A1  | -0.00127 | 0.976992 | 0.986169 | 515 | 501 |
| DHX40     | -0.00127 | 0.977063 | 0.98619  | 515 | 515 |
| OSGEPL1   | -0.00127 | 0.977121 | 0.9862   | 515 | 515 |
| KRT40     | -0.00126 | 0.977284 | 0.986265 | 515 | 361 |
| YIF1B     | -0.00125 | 0.977436 | 0.98636  | 515 | 515 |
| C7orf43   | -0.00123 | 0.977758 | 0.986544 | 515 | 515 |
| LPAR2     | -0.00118 | 0.978722 | 0.987246 | 515 | 515 |
| ZNF185    | -0.00118 | 0.978762 | 0.987246 | 515 | 515 |
| USP49     | -0.00117 | 0.97885  | 0.987246 | 515 | 515 |
| GTF3C4    | -0.00115 | 0.979154 | 0.987454 | 515 | 515 |
| FANCC     | -0.00113 | 0.979569 | 0.987583 | 515 | 515 |
| GSTA2     | -0.00112 | 0.979683 | 0.987639 | 515 | 483 |
| AADA3L3   | -0.0011  | 0.980191 | 0.988001 | 515 | 25  |
| ACTG1     | -0.00109 | 0.980376 | 0.988088 | 515 | 515 |
| ANKRD7    | -0.00107 | 0.980639 | 0.988253 | 515 | 408 |
| KLHL32    | -0.00105 | 0.981033 | 0.98859  | 515 | 513 |
| SMEK2     | -0.00105 | 0.981073 | 0.98859  | 515 | 515 |
| PLIN5     | -0.00099 | 0.982063 | 0.98933  | 515 | 515 |
| C10orf68  | -0.00098 | 0.982253 | 0.98933  | 515 | 505 |
| CALB1     | -0.00097 | 0.982498 | 0.989392 | 515 | 371 |
| TOPORS    | -0.00097 | 0.982512 | 0.989392 | 515 | 515 |
| GDPD2     | -0.00093 | 0.983215 | 0.989851 | 515 | 371 |
| HIGD2A    | -0.00089 | 0.983999 | 0.99044  | 515 | 515 |
| GALNTL5   | -0.00087 | 0.984207 | 0.990511 | 515 | 32  |
| NKX2-2    | -0.00086 | 0.984461 | 0.990613 | 515 | 121 |
| NF1P1     | -0.00086 | 0.984517 | 0.990613 | 515 | 13  |
| DUSP14    | -0.00084 | 0.984832 | 0.990831 | 515 | 515 |
| NR1I3     | -0.0008  | 0.985594 | 0.991197 | 515 | 514 |
| SLC38A4   | -0.00079 | 0.985763 | 0.991318 | 515 | 507 |
| SCIN      | -0.00077 | 0.986049 | 0.991505 | 515 | 515 |
| NCRNA0017 | -0.00075 | 0.986435 | 0.991839 | 515 | 227 |
| MFN2      | -0.00069 | 0.987554 | 0.992719 | 515 | 515 |
| LOC100130 | -0.00067 | 0.98783  | 0.992923 | 515 | 77  |
| SETBP1    | -0.00067 | 0.987856 | 0.992923 | 515 | 515 |
| CHDH      | -0.00066 | 0.988107 | 0.993125 | 515 | 515 |
| QTRTD1    | -0.00061 | 0.988941 | 0.993714 | 515 | 515 |
| LDLRAP1   | -0.00061 | 0.989052 | 0.993759 | 515 | 515 |
| PDS5B     | -0.0006  | 0.989135 | 0.993759 | 515 | 515 |
| MLX       | -0.00058 | 0.989587 | 0.994058 | 515 | 515 |
| FAF2      | -0.00057 | 0.989707 | 0.994058 | 515 | 515 |
| LOC647946 | -0.00056 | 0.98988  | 0.994058 | 515 | 486 |
| SDCCAG3   | -0.00056 | 0.989946 | 0.994073 | 515 | 515 |
| NDUFAF1   | -0.00051 | 0.990716 | 0.994747 | 515 | 515 |
| LUZP4     | -0.00049 | 0.991185 | 0.995082 | 515 | 80  |
| NUPL1     | -0.00048 | 0.991249 | 0.995082 | 515 | 515 |

|          |          |          |          |     |     |
|----------|----------|----------|----------|-----|-----|
| KREMEN2  | -0.00048 | 0.991419 | 0.995203 | 515 | 511 |
| GRINA    | -0.00047 | 0.991482 | 0.995216 | 515 | 515 |
| P704P    | -0.00047 | 0.991596 | 0.99528  | 515 | 515 |
| ADCY2    | -0.00043 | 0.99224  | 0.995727 | 515 | 503 |
| ACOX2    | -0.00041 | 0.992554 | 0.995928 | 515 | 515 |
| AGPAT3   | -0.00041 | 0.992621 | 0.995928 | 515 | 515 |
| LIG1     | -0.0004  | 0.99269  | 0.995928 | 515 | 515 |
| SCARNA9L | -0.00037 | 0.99325  | 0.996319 | 515 | 211 |
| FNDC7    | -0.00037 | 0.993279 | 0.996319 | 515 | 172 |
| WDR8     | -0.00037 | 0.993337 | 0.996328 | 515 | 515 |
| MFSD2A   | -0.00036 | 0.99354  | 0.996436 | 515 | 515 |
| PN01     | -0.00036 | 0.993586 | 0.996436 | 515 | 515 |
| OR52A1   | -0.00035 | 0.993601 | 0.996436 | 515 | 4   |
| PEX12    | -0.00035 | 0.993755 | 0.996497 | 515 | 515 |
| MRPS31   | -0.00034 | 0.993909 | 0.996583 | 515 | 515 |
| CDH7     | -0.00034 | 0.993941 | 0.996583 | 515 | 229 |
| CBR4     | -0.00033 | 0.994048 | 0.996641 | 515 | 515 |
| CENPT    | -0.00033 | 0.994119 | 0.996662 | 515 | 515 |
| PNPLA7   | -0.00032 | 0.994266 | 0.99676  | 515 | 515 |
| RAPGEF2  | -0.0003  | 0.994597 | 0.996891 | 515 | 515 |
| TRIM53   | -0.00029 | 0.994836 | 0.997081 | 515 | 219 |
| PFN4     | -0.00028 | 0.994982 | 0.997127 | 515 | 507 |
| SLC17A6  | -0.00026 | 0.995306 | 0.997348 | 515 | 30  |
| TFAM     | -0.00026 | 0.995352 | 0.997348 | 515 | 515 |
| TBCC     | -0.00025 | 0.995482 | 0.997428 | 515 | 515 |
| ARID3A   | -0.00025 | 0.995557 | 0.997453 | 515 | 515 |
| TMCO5A   | -0.00024 | 0.995746 | 0.997593 | 515 | 93  |
| RNF150   | -0.00021 | 0.996228 | 0.997939 | 515 | 515 |
| TTY16    | -0.0002  | 0.996316 | 0.997964 | 515 | 7   |
| S100G    | -0.00019 | 0.996601 | 0.998137 | 515 | 58  |
| GRIN2C   | -0.00019 | 0.996624 | 0.998137 | 515 | 515 |
| OSTBETA  | -0.00018 | 0.996672 | 0.998137 | 515 | 464 |
| MGC26647 | -0.00017 | 0.996841 | 0.998188 | 515 | 23  |
| SLC26A9  | -0.00017 | 0.996913 | 0.998188 | 515 | 514 |
| TLK1     | -0.00017 | 0.99694  | 0.998188 | 515 | 515 |
| A2BP1    | -0.00015 | 0.997316 | 0.998465 | 515 | 219 |
| GPR111   | -0.00013 | 0.997572 | 0.998671 | 515 | 387 |
| PXDN     | -0.0001  | 0.998123 | 0.999062 | 515 | 515 |
| NPNT     | -0.0001  | 0.998159 | 0.999062 | 515 | 515 |
| NEUROG2  | #####    | 0.998212 | 0.999062 | 515 | 165 |
| RPGR     | #####    | 0.998382 | 0.999182 | 515 | 515 |
| TMEM202  | #####    | 0.998684 | 0.99935  | 515 | 9   |
| SLC22A7  | #####    | 0.998767 | 0.99935  | 515 | 70  |
| C19orf43 | #####    | 0.99912  | 0.999522 | 515 | 515 |
| C3orf19  | #####    | 0.999381 | 0.999631 | 515 | 515 |
| CLCN5    | #####    | 0.999684 | 0.999784 | 515 | 515 |
| OR5AN1   | 4.33E-06 | 0.999922 | 0.999922 | 515 | 12  |
| OR10G7   | 8.70E-06 | 0.999843 | 0.999893 | 515 | 5   |
| WDFY3    | 2.84E-05 | 0.999487 | 0.999637 | 515 | 515 |
| RPL26L1  | 2.85E-05 | 0.999486 | 0.999637 | 515 | 515 |
| ZNF319   | 4.04E-05 | 0.99927  | 0.99957  | 515 | 515 |
| DDX46    | 4.15E-05 | 0.999251 | 0.99957  | 515 | 515 |
| ASB9     | 4.86E-05 | 0.999122 | 0.999522 | 515 | 515 |
| CIDEB    | 6.36E-05 | 0.99885  | 0.99935  | 515 | 515 |

|           |          |          |          |     |     |
|-----------|----------|----------|----------|-----|-----|
| C11orf65  | 6.50E-05 | 0.998825 | 0.99935  | 515 | 507 |
| MGC16275  | 6.66E-05 | 0.998797 | 0.99935  | 515 | 515 |
| CDC20     | 7.44E-05 | 0.998656 | 0.99935  | 515 | 515 |
| DRD4      | 0.0001   | 0.998187 | 0.999062 | 515 | 504 |
| CDHR3     | 0.00012  | 0.997825 | 0.998874 | 515 | 515 |
| SYCP2     | 0.000155 | 0.997199 | 0.998398 | 515 | 514 |
| HAR1B     | 0.000181 | 0.996739 | 0.998137 | 515 | 438 |
| STOML1    | 0.000181 | 0.996724 | 0.998137 | 515 | 515 |
| CGB2      | 0.000208 | 0.996242 | 0.997939 | 515 | 291 |
| LOC644669 | 0.000215 | 0.996111 | 0.997909 | 515 | 117 |
| MFHAS1    | 0.000267 | 0.99518  | 0.997276 | 515 | 515 |
| C22orf43  | 0.000279 | 0.994955 | 0.997127 | 515 | 385 |
| SP3       | 0.000301 | 0.994556 | 0.996891 | 515 | 515 |
| CCDC115   | 0.000309 | 0.994425 | 0.996819 | 515 | 515 |
| SOX20T    | 0.000315 | 0.994319 | 0.996762 | 515 | 499 |
| C18orf25  | 0.000352 | 0.993644 | 0.996436 | 515 | 515 |
| LOC731779 | 0.000386 | 0.993025 | 0.996164 | 515 | 37  |
| GSTT1     | 0.0004   | 0.992776 | 0.995965 | 515 | 466 |
| C21orf82  | 0.000405 | 0.992683 | 0.995928 | 515 | 514 |
| CRHR1     | 0.000425 | 0.992326 | 0.995764 | 515 | 294 |
| C3orf71   | 0.000442 | 0.992012 | 0.995549 | 515 | 515 |
| CCDC70    | 0.000442 | 0.99201  | 0.995549 | 515 | 24  |
| GNB2L1    | 0.00046  | 0.991698 | 0.995333 | 515 | 515 |
| SNORD116  | 0.000485 | 0.991238 | 0.995082 | 515 | 480 |
| OR6F1     | 0.000487 | 0.991201 | 0.995082 | 515 | 14  |
| APOL5     | 0.00052  | 0.990611 | 0.994691 | 515 | 122 |
| TNPO3     | 0.000562 | 0.989851 | 0.994058 | 515 | 515 |
| DDX11L2   | 0.000564 | 0.989804 | 0.994058 | 515 | 502 |
| CYP2C8    | 0.000565 | 0.989787 | 0.994058 | 515 | 478 |
| GABRB2    | 0.00057  | 0.989696 | 0.994058 | 515 | 507 |
| SLC12A9   | 0.000572 | 0.989667 | 0.994058 | 515 | 515 |
| DNAJC10   | 0.000576 | 0.989588 | 0.994058 | 515 | 515 |
| FGFR4     | 0.000603 | 0.9891   | 0.993759 | 515 | 514 |
| RPL22L1   | 0.000625 | 0.988718 | 0.99354  | 515 | 515 |
| SVIP      | 0.000646 | 0.98834  | 0.99321  | 515 | 515 |
| RPS6KB1   | 0.000648 | 0.988294 | 0.99321  | 515 | 515 |
| TRMT1     | 0.000649 | 0.988281 | 0.99321  | 515 | 515 |
| OR13G1    | 0.000702 | 0.987317 | 0.992531 | 515 | 11  |
| TARM1     | 0.000728 | 0.986846 | 0.992107 | 515 | 27  |
| PSMD5     | 0.000736 | 0.98671  | 0.992021 | 515 | 515 |
| BLVRB     | 0.000749 | 0.98648  | 0.991839 | 515 | 515 |
| LOC643837 | 0.000778 | 0.985946 | 0.991452 | 515 | 515 |
| NPVF      | 0.000807 | 0.985425 | 0.991078 | 515 | 4   |
| DNAJC15   | 0.000809 | 0.985392 | 0.991078 | 515 | 515 |
| PHF10     | 0.000814 | 0.985304 | 0.991055 | 515 | 515 |
| SYP       | 0.000815 | 0.985285 | 0.991055 | 515 | 515 |
| RAD51AP2  | 0.000823 | 0.985135 | 0.990985 | 515 | 339 |
| RFC5      | 0.000826 | 0.985075 | 0.990975 | 515 | 515 |
| FKBP10    | 0.000828 | 0.985045 | 0.990975 | 515 | 515 |
| LRRC16B   | 0.000841 | 0.984809 | 0.990831 | 515 | 508 |
| RNF180    | 0.000859 | 0.984485 | 0.990613 | 515 | 515 |
| C12orf32  | 0.000863 | 0.984415 | 0.990613 | 515 | 515 |
| GPR109A   | 0.000874 | 0.984217 | 0.990511 | 515 | 515 |
| PANK4     | 0.000881 | 0.98409  | 0.990482 | 515 | 515 |

|           |          |          |          |     |     |
|-----------|----------|----------|----------|-----|-----|
| CCDC105   | 0.000893 | 0.983877 | 0.990368 | 515 | 4   |
| MTRF1     | 0.000901 | 0.983723 | 0.990263 | 515 | 515 |
| WFDC1     | 0.000912 | 0.98352  | 0.990109 | 515 | 515 |
| FOXK1     | 0.000936 | 0.98309  | 0.989775 | 515 | 515 |
| C1orf49   | 0.000936 | 0.983088 | 0.989775 | 515 | 205 |
| USP32     | 0.000951 | 0.982832 | 0.989614 | 515 | 515 |
| FLRT3     | 0.000965 | 0.982569 | 0.9894   | 515 | 515 |
| C17orf50  | 0.000977 | 0.982351 | 0.98933  | 515 | 445 |
| RWDD3     | 0.000977 | 0.982349 | 0.98933  | 515 | 515 |
| NCRNA0018 | 0.000979 | 0.982322 | 0.98933  | 515 | 515 |
| TGIF2LX   | 0.000985 | 0.982215 | 0.98933  | 515 | 80  |
| TMPRSS5   | 0.000987 | 0.982165 | 0.98933  | 515 | 482 |
| SMEK3P    | 0.000993 | 0.982062 | 0.98933  | 515 | 85  |
| OR10W1    | 0.001005 | 0.981842 | 0.989216 | 515 | 16  |
| PPP1R8    | 0.001025 | 0.981482 | 0.988903 | 515 | 515 |
| PCSK1N    | 0.001035 | 0.981306 | 0.988776 | 515 | 513 |
| ANAPC13   | 0.001073 | 0.980612 | 0.988253 | 515 | 515 |
| PTPRZ1    | 0.001088 | 0.980342 | 0.988088 | 515 | 505 |
| PRR22     | 0.001098 | 0.980167 | 0.988001 | 515 | 513 |
| KCND2     | 0.001107 | 0.980012 | 0.98792  | 515 | 513 |
| GPR139    | 0.001131 | 0.979579 | 0.987583 | 515 | 4   |
| RND1      | 0.001131 | 0.979567 | 0.987583 | 515 | 515 |
| SNORD15B  | 0.001134 | 0.97951  | 0.987583 | 515 | 235 |
| PIGA      | 0.00114  | 0.979413 | 0.987583 | 515 | 515 |
| CACNG5    | 0.00114  | 0.979412 | 0.987583 | 515 | 92  |
| PENK      | 0.001165 | 0.978966 | 0.987313 | 515 | 497 |
| LOC494141 | 0.001173 | 0.978811 | 0.987246 | 515 | 132 |
| GKN2      | 0.001177 | 0.978741 | 0.987246 | 515 | 453 |
| IARS      | 0.001182 | 0.978658 | 0.987246 | 515 | 515 |
| PTHLH     | 0.001193 | 0.978454 | 0.987146 | 515 | 514 |
| JRK       | 0.001219 | 0.977975 | 0.986713 | 515 | 515 |
| ABCG5     | 0.001244 | 0.977527 | 0.98636  | 515 | 391 |
| SOCS5     | 0.001246 | 0.977491 | 0.98636  | 515 | 515 |
| RAB19     | 0.001262 | 0.977208 | 0.986237 | 515 | 513 |
| KRT15     | 0.001284 | 0.976815 | 0.98604  | 515 | 515 |
| PTPN20B   | 0.001286 | 0.976782 | 0.98604  | 515 | 493 |
| MED26     | 0.001292 | 0.976661 | 0.986034 | 515 | 515 |
| KRTAP12-1 | 0.0013   | 0.97653  | 0.986001 | 515 | 33  |
| AGTRAP    | 0.00131  | 0.976333 | 0.985902 | 515 | 515 |
| PDE8B     | 0.001321 | 0.976149 | 0.985766 | 515 | 515 |
| RASD2     | 0.001352 | 0.975589 | 0.985499 | 515 | 515 |
| CYB5B     | 0.00136  | 0.975441 | 0.985399 | 515 | 515 |
| RNASE4    | 0.001363 | 0.975378 | 0.985385 | 515 | 515 |
| C9orf45   | 0.001364 | 0.975359 | 0.985385 | 515 | 515 |
| PRPF40A   | 0.001384 | 0.975003 | 0.985206 | 515 | 515 |
| TMEM123   | 0.001411 | 0.974522 | 0.98482  | 515 | 515 |
| LIPJ      | 0.001433 | 0.974125 | 0.984568 | 515 | 202 |
| C5orf28   | 0.00149  | 0.973096 | 0.983776 | 515 | 515 |
| FGF17     | 0.001497 | 0.972973 | 0.983751 | 515 | 420 |
| SNORA8    | 0.001517 | 0.972607 | 0.983509 | 515 | 515 |
| MKRN3     | 0.001547 | 0.972055 | 0.983023 | 515 | 411 |
| PLSCR3    | 0.001551 | 0.971983 | 0.983023 | 515 | 515 |
| RPS9      | 0.001574 | 0.971575 | 0.982736 | 515 | 515 |
| FAM82B    | 0.001584 | 0.971391 | 0.9826   | 515 | 515 |

|           |          |          |          |     |     |
|-----------|----------|----------|----------|-----|-----|
| C15orf38  | 0.001639 | 0.970407 | 0.981952 | 515 | 515 |
| SDHAP1    | 0.001643 | 0.970334 | 0.981928 | 515 | 515 |
| NPY       | 0.001672 | 0.96981  | 0.981447 | 515 | 156 |
| NAT6      | 0.001693 | 0.969435 | 0.981118 | 515 | 515 |
| TMEFF2    | 0.001693 | 0.969422 | 0.981118 | 515 | 266 |
| C8orf44   | 0.001727 | 0.968806 | 0.98063  | 515 | 515 |
| CYP39A1   | 0.00175  | 0.968406 | 0.980473 | 515 | 515 |
| TAF1A     | 0.001773 | 0.967988 | 0.980149 | 515 | 515 |
| RPL23AP7  | 0.00179  | 0.967673 | 0.979929 | 515 | 515 |
| NPIPL3    | 0.001835 | 0.96687  | 0.979414 | 515 | 515 |
| HFM1      | 0.001843 | 0.966719 | 0.979384 | 515 | 467 |
| BTBD8     | 0.001846 | 0.96667  | 0.979384 | 515 | 503 |
| TIMM10    | 0.00188  | 0.966044 | 0.978825 | 515 | 515 |
| SR140     | 0.001886 | 0.965941 | 0.97877  | 515 | 515 |
| PARP2     | 0.001894 | 0.965807 | 0.978685 | 515 | 515 |
| GAD1      | 0.001912 | 0.965482 | 0.978454 | 515 | 504 |
| POLE4     | 0.001941 | 0.964956 | 0.97802  | 515 | 515 |
| SKA3      | 0.001957 | 0.96467  | 0.977874 | 515 | 515 |
| SPINK1    | 0.001977 | 0.964304 | 0.977657 | 515 | 512 |
| C1orf112  | 0.001987 | 0.964124 | 0.977524 | 515 | 515 |
| TTY5      | 0.001987 | 0.96412  | 0.977524 | 515 | 5   |
| SMR3A     | 0.00205  | 0.962992 | 0.976723 | 515 | 21  |
| DUS2L     | 0.002081 | 0.962419 | 0.97634  | 515 | 515 |
| FAM161A   | 0.002091 | 0.962237 | 0.976205 | 515 | 515 |
| CT47A11   | 0.002098 | 0.962117 | 0.976183 | 515 | 4   |
| RIMS2     | 0.002123 | 0.961669 | 0.975777 | 515 | 418 |
| SEC22B    | 0.002124 | 0.961658 | 0.975777 | 515 | 515 |
| MRPL34    | 0.002142 | 0.961321 | 0.975573 | 515 | 515 |
| PPP1R14A  | 0.002163 | 0.960943 | 0.97538  | 515 | 515 |
| GTPBP2    | 0.002176 | 0.960702 | 0.975214 | 515 | 515 |
| MCTP2     | 0.002179 | 0.960654 | 0.975214 | 515 | 515 |
| ZNF732    | 0.002181 | 0.960625 | 0.975214 | 515 | 490 |
| TP53TG3B  | 0.002194 | 0.960391 | 0.975181 | 515 | 256 |
| TBC1D25   | 0.002198 | 0.960318 | 0.975181 | 515 | 515 |
| TIPRL     | 0.002206 | 0.960166 | 0.975144 | 515 | 515 |
| EMX2OS    | 0.002254 | 0.959313 | 0.974376 | 515 | 285 |
| PRSS42    | 0.002271 | 0.95899  | 0.974098 | 515 | 142 |
| SNORD115- | 0.002277 | 0.958894 | 0.97405  | 515 | 56  |
| NIPA2     | 0.002297 | 0.958528 | 0.973829 | 515 | 515 |
| RPL27A    | 0.002297 | 0.958521 | 0.973829 | 515 | 515 |
| DUOX2     | 0.002306 | 0.958359 | 0.973829 | 515 | 513 |
| HOXB7     | 0.002307 | 0.958343 | 0.973829 | 515 | 515 |
| FAM190B   | 0.002313 | 0.958232 | 0.973822 | 515 | 515 |
| RG9MTD1   | 0.002337 | 0.957804 | 0.973437 | 515 | 515 |
| ANKFN1    | 0.002338 | 0.957794 | 0.973437 | 515 | 465 |
| NXPH2     | 0.002354 | 0.957492 | 0.973268 | 515 | 350 |
| DHX40P1   | 0.002401 | 0.956654 | 0.972565 | 515 | 258 |
| LOC158696 | 0.002408 | 0.956526 | 0.972485 | 515 | 455 |
| CCDC19    | 0.002409 | 0.956512 | 0.972485 | 515 | 515 |
| FAM156A   | 0.002417 | 0.956367 | 0.972421 | 515 | 515 |
| C9orf50   | 0.002426 | 0.956199 | 0.97235  | 515 | 364 |
| NKX2-6    | 0.002433 | 0.956079 | 0.972278 | 515 | 17  |
| LOC151658 | 0.002439 | 0.955969 | 0.972215 | 515 | 45  |
| YEATS2    | 0.002452 | 0.955726 | 0.972066 | 515 | 515 |

|           |          |          |          |     |     |
|-----------|----------|----------|----------|-----|-----|
| GYPA      | 0.002463 | 0.955532 | 0.971918 | 515 | 76  |
| MYO16     | 0.002472 | 0.95538  | 0.971814 | 515 | 513 |
| BTF3L1    | 0.002499 | 0.954893 | 0.971417 | 515 | 148 |
| LRP12     | 0.002501 | 0.954858 | 0.971417 | 515 | 515 |
| KRR1      | 0.002504 | 0.954798 | 0.971417 | 515 | 515 |
| C1orf94   | 0.002531 | 0.954317 | 0.970979 | 515 | 127 |
| ZNF878    | 0.002532 | 0.954299 | 0.970979 | 515 | 493 |
| SMPD1     | 0.002549 | 0.953974 | 0.970878 | 515 | 515 |
| ZNF552    | 0.002594 | 0.953178 | 0.970274 | 515 | 515 |
| DAAM2     | 0.002608 | 0.952911 | 0.970141 | 515 | 515 |
| MAGEB3    | 0.002613 | 0.952833 | 0.970112 | 515 | 27  |
| MMP23A    | 0.002623 | 0.952651 | 0.970023 | 515 | 120 |
| SNORA38B  | 0.002651 | 0.952143 | 0.969776 | 515 | 25  |
| FBXO2     | 0.002662 | 0.951948 | 0.969725 | 515 | 515 |
| MBD3L5    | 0.002685 | 0.951534 | 0.969381 | 515 | 15  |
| PADI3     | 0.002748 | 0.950387 | 0.968361 | 515 | 336 |
| SLC7A5P1  | 0.002764 | 0.950113 | 0.96823  | 515 | 349 |
| FUT5      | 0.002783 | 0.949757 | 0.967966 | 515 | 337 |
| LOC148189 | 0.002826 | 0.94898  | 0.967371 | 515 | 515 |
| TMEM111   | 0.002831 | 0.948907 | 0.967346 | 515 | 515 |
| ANKRD46   | 0.002894 | 0.94777  | 0.966385 | 515 | 515 |
| NR2C1     | 0.002898 | 0.9477   | 0.966385 | 515 | 515 |
| MTSS1     | 0.002917 | 0.947356 | 0.966159 | 515 | 515 |
| KRT80     | 0.002928 | 0.947154 | 0.966002 | 515 | 515 |
| TMPRSS11E | 0.002935 | 0.947021 | 0.965916 | 515 | 12  |
| DEM1      | 0.002946 | 0.946835 | 0.965825 | 515 | 515 |
| SNORA25   | 0.002999 | 0.945875 | 0.965141 | 515 | 22  |
| LMX1B     | 0.003013 | 0.945612 | 0.964922 | 515 | 461 |
| TPTE2P1   | 0.003025 | 0.945409 | 0.964764 | 515 | 499 |
| FPGS      | 0.003029 | 0.945324 | 0.964764 | 515 | 515 |
| FARP2     | 0.003038 | 0.945163 | 0.96466  | 515 | 515 |
| ANKRD50   | 0.003049 | 0.944974 | 0.964553 | 515 | 515 |
| POMZP3    | 0.00309  | 0.944237 | 0.96406  | 515 | 515 |
| KIAA0494  | 0.003104 | 0.94398  | 0.963847 | 515 | 515 |
| OBFC1     | 0.003134 | 0.943444 | 0.963448 | 515 | 515 |
| ARHGDI1   | 0.003141 | 0.943318 | 0.963368 | 515 | 515 |
| SLC30A6   | 0.003153 | 0.943098 | 0.963193 | 515 | 515 |
| IGLON5    | 0.003157 | 0.943031 | 0.963193 | 515 | 507 |
| C16orf62  | 0.003159 | 0.942996 | 0.963193 | 515 | 515 |
| CSTB      | 0.003173 | 0.942734 | 0.963067 | 515 | 515 |
| ATF2      | 0.003204 | 0.942185 | 0.962703 | 515 | 515 |
| KIF20A    | 0.00321  | 0.942071 | 0.962636 | 515 | 515 |
| DEFB109P1 | 0.003232 | 0.941675 | 0.96233  | 515 | 16  |
| C1orf227  | 0.003238 | 0.94156  | 0.962262 | 515 | 329 |
| BSN       | 0.003242 | 0.941498 | 0.962247 | 515 | 515 |
| TRIM48    | 0.00325  | 0.941357 | 0.962152 | 515 | 81  |
| OR52N1    | 0.003275 | 0.940897 | 0.961781 | 515 | 35  |
| DONSON    | 0.003278 | 0.940849 | 0.96178  | 515 | 515 |
| ANKMY1    | 0.00328  | 0.940807 | 0.96178  | 515 | 515 |
| LEPRE1    | 0.003292 | 0.940591 | 0.961664 | 515 | 515 |
| DNM1P35   | 0.003311 | 0.940243 | 0.961472 | 515 | 515 |
| KRTAP26-1 | 0.003328 | 0.939951 | 0.961304 | 515 | 5   |
| SEC11C    | 0.003328 | 0.939948 | 0.961304 | 515 | 515 |
| ZSWIM3    | 0.00337  | 0.939185 | 0.960718 | 515 | 515 |

|           |          |          |          |     |     |
|-----------|----------|----------|----------|-----|-----|
| NOL11     | 0.003376 | 0.939072 | 0.960701 | 515 | 515 |
| TBC1D13   | 0.003383 | 0.93895  | 0.960625 | 515 | 515 |
| MUM1      | 0.003394 | 0.938754 | 0.960474 | 515 | 515 |
| DGCR5     | 0.003398 | 0.938687 | 0.960455 | 515 | 514 |
| C10orf122 | 0.003407 | 0.938521 | 0.960432 | 515 | 69  |
| PDZD9     | 0.003441 | 0.937912 | 0.959907 | 515 | 325 |
| ASB7      | 0.003444 | 0.937846 | 0.959888 | 515 | 515 |
| ADAM30    | 0.003459 | 0.937577 | 0.959712 | 515 | 23  |
| KCNF1     | 0.00348  | 0.937206 | 0.959381 | 515 | 505 |
| CRYGN     | 0.003488 | 0.937069 | 0.959381 | 515 | 451 |
| APIAR     | 0.003495 | 0.936931 | 0.959381 | 515 | 515 |
| LOC338651 | 0.003504 | 0.936781 | 0.95929  | 515 | 508 |
| KDM5A     | 0.003527 | 0.936353 | 0.958901 | 515 | 515 |
| CRYGD     | 0.003547 | 0.935992 | 0.958727 | 515 | 24  |
| LCE5A     | 0.00355  | 0.935951 | 0.958727 | 515 | 47  |
| ATP9B     | 0.003574 | 0.935507 | 0.958427 | 515 | 515 |
| PTGES3    | 0.003638 | 0.934361 | 0.957548 | 515 | 515 |
| TRPC7     | 0.003649 | 0.934172 | 0.957501 | 515 | 18  |
| RP1L1     | 0.003655 | 0.934063 | 0.957438 | 515 | 454 |
| TIGD4     | 0.003665 | 0.93388  | 0.9573   | 515 | 514 |
| GDNF      | 0.003706 | 0.933134 | 0.956682 | 515 | 291 |
| PRDXDD1P  | 0.00371  | 0.933074 | 0.95667  | 515 | 515 |
| CNNM4     | 0.003711 | 0.933055 | 0.95667  | 515 | 515 |
| SPATA24   | 0.003712 | 0.933036 | 0.95667  | 515 | 515 |
| SMCR7L    | 0.00373  | 0.932708 | 0.956442 | 515 | 515 |
| KCTD4     | 0.003733 | 0.932647 | 0.956429 | 515 | 221 |
| TRAPPC2L  | 0.003733 | 0.932643 | 0.956429 | 515 | 515 |
| NLN       | 0.003741 | 0.932506 | 0.956382 | 515 | 515 |
| ZNF473    | 0.003757 | 0.932217 | 0.956135 | 515 | 515 |
| TMEM82    | 0.003801 | 0.931431 | 0.955407 | 515 | 374 |
| PLCZ1     | 0.003801 | 0.93143  | 0.955407 | 515 | 148 |
| RPL15     | 0.00382  | 0.931079 | 0.955262 | 515 | 515 |
| CNTN3     | 0.003821 | 0.931076 | 0.955262 | 515 | 508 |
| DKFZp434L | 0.003832 | 0.930872 | 0.955147 | 515 | 21  |
| POLH      | 0.003838 | 0.930764 | 0.955092 | 515 | 515 |
| DEFB103B  | 0.003846 | 0.930621 | 0.955036 | 515 | 62  |
| AHSA2     | 0.003889 | 0.929848 | 0.954488 | 515 | 515 |
| C20orf191 | 0.003917 | 0.929347 | 0.954171 | 515 | 88  |
| LOC729609 | 0.003951 | 0.928737 | 0.95374  | 515 | 120 |
| SURF4     | 0.003957 | 0.928623 | 0.953721 | 515 | 515 |
| RGPD8     | 0.004026 | 0.927381 | 0.95274  | 515 | 51  |
| LOC642826 | 0.004044 | 0.927054 | 0.95255  | 515 | 515 |
| MAPRE3    | 0.004104 | 0.925985 | 0.951712 | 515 | 515 |
| OR10H2    | 0.004109 | 0.925883 | 0.951689 | 515 | 76  |
| A2ML1     | 0.004112 | 0.925836 | 0.951689 | 515 | 372 |
| ALKBH6    | 0.00412  | 0.925693 | 0.951592 | 515 | 515 |
| SULT4A1   | 0.004136 | 0.925395 | 0.951384 | 515 | 412 |
| PIH1D2    | 0.004217 | 0.92394  | 0.950034 | 515 | 515 |
| CASC2     | 0.004228 | 0.923748 | 0.949885 | 515 | 515 |
| OR9G4     | 0.004231 | 0.923701 | 0.949885 | 515 | 16  |
| RWDD4A    | 0.004244 | 0.923456 | 0.949683 | 515 | 515 |
| TRAPPC3   | 0.00425  | 0.923358 | 0.949679 | 515 | 515 |
| NT5C1B    | 0.004265 | 0.923088 | 0.949598 | 515 | 476 |
| SH3GLB2   | 0.004267 | 0.923049 | 0.949598 | 515 | 515 |



|           |          |          |          |     |     |
|-----------|----------|----------|----------|-----|-----|
| ZSCAN5B   | 0.004269 | 0.923015 | 0.949598 | 515 | 446 |
| DEFA5     | 0.004303 | 0.922403 | 0.949088 | 515 | 33  |
| ZNF613    | 0.004305 | 0.922355 | 0.949088 | 515 | 515 |
| RIC8B     | 0.004349 | 0.92157  | 0.948622 | 515 | 515 |
| ZNF260    | 0.00436  | 0.921378 | 0.948473 | 515 | 515 |
| EPHA2     | 0.004382 | 0.920972 | 0.948152 | 515 | 515 |
| GOLGA6B   | 0.004416 | 0.920362 | 0.94772  | 515 | 380 |
| EMX1      | 0.004448 | 0.919791 | 0.947299 | 515 | 334 |
| RSL24D1   | 0.004495 | 0.918951 | 0.946608 | 515 | 515 |
| UGT1A6    | 0.004546 | 0.918026 | 0.945851 | 515 | 476 |
| SEL1L2    | 0.004548 | 0.917989 | 0.945851 | 515 | 93  |
| RUFY3     | 0.004559 | 0.917792 | 0.945707 | 515 | 515 |
| GEMIN5    | 0.004582 | 0.917386 | 0.945337 | 515 | 515 |
| SHISA2    | 0.004589 | 0.91726  | 0.945256 | 515 | 515 |
| AKAP12    | 0.004609 | 0.916898 | 0.944946 | 515 | 515 |
| PLLP      | 0.004613 | 0.916825 | 0.944946 | 515 | 515 |
| OR6K6     | 0.004616 | 0.916772 | 0.944946 | 515 | 5   |
| IGFBP3    | 0.004619 | 0.916727 | 0.944946 | 515 | 515 |
| SAPS2     | 0.004622 | 0.916673 | 0.944946 | 515 | 515 |
| SNORA70B  | 0.004642 | 0.916308 | 0.944714 | 515 | 4   |
| RAB11FIP1 | 0.004673 | 0.915755 | 0.944193 | 515 | 515 |
| COMMD5    | 0.004684 | 0.915552 | 0.944032 | 515 | 515 |
| CCDC158   | 0.004695 | 0.915354 | 0.943924 | 515 | 441 |
| IQSEC2    | 0.004716 | 0.914984 | 0.94369  | 515 | 515 |
| DUOXA2    | 0.004716 | 0.914978 | 0.94369  | 515 | 507 |
| SGK494    | 0.004717 | 0.91495  | 0.94369  | 515 | 515 |
| MUC7      | 0.004719 | 0.914923 | 0.94369  | 515 | 35  |
| CDADC1    | 0.004731 | 0.914704 | 0.943644 | 515 | 515 |
| CLDN12    | 0.004746 | 0.914437 | 0.943466 | 515 | 515 |
| N4BP2     | 0.004752 | 0.914323 | 0.943397 | 515 | 515 |
| ACR       | 0.004762 | 0.914142 | 0.943259 | 515 | 456 |
| WHAMM     | 0.004776 | 0.9139   | 0.943146 | 515 | 515 |
| PDE1C     | 0.004812 | 0.913258 | 0.942638 | 515 | 510 |
| LBP       | 0.004842 | 0.912705 | 0.942311 | 515 | 390 |
| OR5M11    | 0.00485  | 0.912574 | 0.942231 | 515 | 72  |
| SLC9A10   | 0.004875 | 0.912129 | 0.941863 | 515 | 389 |
| POC1A     | 0.00488  | 0.912033 | 0.941812 | 515 | 515 |
| BTF3      | 0.004881 | 0.912019 | 0.941812 | 515 | 515 |
| RANBP3    | 0.004888 | 0.911892 | 0.941764 | 515 | 515 |
| LOC653544 | 0.004895 | 0.911757 | 0.941673 | 515 | 23  |
| ANKRD34B  | 0.004908 | 0.911529 | 0.941486 | 515 | 463 |
| LMOD2     | 0.004908 | 0.911525 | 0.941486 | 515 | 152 |
| TMEM191A  | 0.004948 | 0.910808 | 0.940936 | 515 | 515 |
| INHBE     | 0.004962 | 0.910555 | 0.940724 | 515 | 493 |
| LOC728323 | 0.004979 | 0.910257 | 0.940464 | 515 | 513 |
| SRD5A1    | 0.004996 | 0.909942 | 0.940235 | 515 | 515 |
| C6orf81   | 0.004998 | 0.909911 | 0.940235 | 515 | 489 |
| CTSL3     | 0.005001 | 0.909862 | 0.940235 | 515 | 10  |
| HIST1H1A  | 0.005004 | 0.909806 | 0.940235 | 515 | 90  |
| ONECUT1   | 0.005054 | 0.908914 | 0.939611 | 515 | 447 |
| C14orf21  | 0.005062 | 0.908756 | 0.939514 | 515 | 515 |
| CCDC91    | 0.005064 | 0.908728 | 0.939514 | 515 | 515 |
| KRTAP3-1  | 0.005076 | 0.908505 | 0.939481 | 515 | 264 |
| C5orf24   | 0.005094 | 0.908192 | 0.939301 | 515 | 515 |

|           |          |          |          |     |     |
|-----------|----------|----------|----------|-----|-----|
| CPEB2     | 0.005095 | 0.908176 | 0.939301 | 515 | 515 |
| TSGA14    | 0.0051   | 0.908088 | 0.939301 | 515 | 515 |
| NFU1      | 0.005103 | 0.908029 | 0.939301 | 515 | 515 |
| SEC61A2   | 0.005119 | 0.90775  | 0.939136 | 515 | 515 |
| PSMA4     | 0.005127 | 0.907596 | 0.939025 | 515 | 515 |
| LRRCC1    | 0.005141 | 0.907344 | 0.938862 | 515 | 515 |
| ZP4       | 0.005143 | 0.907304 | 0.938862 | 515 | 18  |
| ATP6V1E1  | 0.005146 | 0.907251 | 0.938862 | 515 | 515 |
| UBE2CBP   | 0.005161 | 0.906986 | 0.938638 | 515 | 515 |
| FAM27C    | 0.005174 | 0.906747 | 0.938487 | 515 | 514 |
| TTL8      | 0.005183 | 0.906597 | 0.938429 | 515 | 79  |
| HIST1H4G  | 0.005185 | 0.906557 | 0.938429 | 515 | 7   |
| PPP2CB    | 0.005218 | 0.905964 | 0.938016 | 515 | 515 |
| F9        | 0.005223 | 0.905876 | 0.938016 | 515 | 25  |
| DISC2     | 0.005284 | 0.904785 | 0.937135 | 515 | 239 |
| SLC8A2    | 0.005294 | 0.904603 | 0.936996 | 515 | 474 |
| CLDN17    | 0.005311 | 0.904303 | 0.936734 | 515 | 13  |
| ZBTB10    | 0.005319 | 0.904153 | 0.936626 | 515 | 515 |
| ZSCAN12   | 0.005333 | 0.903903 | 0.936416 | 515 | 515 |
| TCERG1L   | 0.005334 | 0.903889 | 0.936416 | 515 | 329 |
| OR5AC2    | 0.005334 | 0.90388  | 0.936416 | 515 | 5   |
| C12orf62  | 0.005341 | 0.903764 | 0.936416 | 515 | 515 |
| BUD13     | 0.00537  | 0.903238 | 0.936061 | 515 | 515 |
| RGPD5     | 0.005377 | 0.903122 | 0.935995 | 515 | 514 |
| GNAL      | 0.005395 | 0.902788 | 0.935698 | 515 | 515 |
| AP2A1     | 0.005401 | 0.902676 | 0.935698 | 515 | 515 |
| C1orf65   | 0.00543  | 0.902163 | 0.93533  | 515 | 445 |
| FAM127A   | 0.005433 | 0.902111 | 0.93533  | 515 | 515 |
| GTF3A     | 0.005437 | 0.90204  | 0.935311 | 515 | 515 |
| CSTT      | 0.005455 | 0.901708 | 0.935063 | 515 | 4   |
| PLEKHN1   | 0.005461 | 0.901609 | 0.935009 | 515 | 515 |
| TMEM48    | 0.005467 | 0.901502 | 0.934946 | 515 | 515 |
| EFNB3     | 0.005475 | 0.901358 | 0.934894 | 515 | 515 |
| RPS2P32   | 0.005493 | 0.901039 | 0.934611 | 515 | 515 |
| EPGN      | 0.00552  | 0.900543 | 0.934293 | 515 | 222 |
| LYPD2     | 0.005537 | 0.900255 | 0.934089 | 515 | 260 |
| CABP1     | 0.00554  | 0.900193 | 0.934074 | 515 | 439 |
| PPP1R1C   | 0.005562 | 0.899807 | 0.93377  | 515 | 508 |
| ZNRF4     | 0.005575 | 0.899571 | 0.933574 | 515 | 10  |
| GRIP1     | 0.005575 | 0.899561 | 0.933574 | 515 | 515 |
| GTF2H2B   | 0.005576 | 0.899541 | 0.933574 | 515 | 514 |
| DCTN2     | 0.00563  | 0.898574 | 0.932975 | 515 | 515 |
| TRIO      | 0.005643 | 0.898356 | 0.932796 | 515 | 515 |
| FAM181B   | 0.005655 | 0.898124 | 0.932653 | 515 | 427 |
| SULT1C3   | 0.005656 | 0.898112 | 0.932653 | 515 | 14  |
| HIATL2    | 0.005705 | 0.897237 | 0.931984 | 515 | 515 |
| GABARAPL1 | 0.005706 | 0.897226 | 0.931984 | 515 | 515 |
| TTPAL     | 0.005728 | 0.896831 | 0.931794 | 515 | 515 |
| HIST1H4A  | 0.005731 | 0.896765 | 0.931794 | 515 | 239 |
| HPYR1     | 0.005737 | 0.89666  | 0.931788 | 515 | 72  |
| CEP57     | 0.005742 | 0.896574 | 0.931769 | 515 | 515 |
| MPG       | 0.005765 | 0.896163 | 0.931559 | 515 | 515 |
| DDI1      | 0.005795 | 0.895615 | 0.93116  | 515 | 56  |
| HIGD1A    | 0.005821 | 0.895162 | 0.930738 | 515 | 515 |

|           |          |          |          |     |     |
|-----------|----------|----------|----------|-----|-----|
| SDHAF1    | 0.005846 | 0.894718 | 0.930324 | 515 | 515 |
| TSPAN14   | 0.005873 | 0.894235 | 0.92987  | 515 | 515 |
| CCDC107   | 0.005897 | 0.893798 | 0.929464 | 515 | 515 |
| SYT9      | 0.005913 | 0.893511 | 0.929262 | 515 | 379 |
| PDHA2     | 0.005923 | 0.893332 | 0.929222 | 515 | 50  |
| ANKHD1    | 0.005956 | 0.892733 | 0.928695 | 515 | 515 |
| NXT2      | 0.005975 | 0.892399 | 0.928456 | 515 | 515 |
| KRT71     | 0.005999 | 0.89197  | 0.928237 | 515 | 106 |
| DICER1    | 0.006011 | 0.891749 | 0.928154 | 515 | 515 |
| PROL1     | 0.006013 | 0.891728 | 0.928154 | 515 | 6   |
| KCNC4     | 0.006023 | 0.891536 | 0.928077 | 515 | 515 |
| GPR3      | 0.006068 | 0.890729 | 0.927334 | 515 | 514 |
| GNS       | 0.006083 | 0.890465 | 0.927156 | 515 | 515 |
| LECT1     | 0.006101 | 0.890155 | 0.92693  | 515 | 287 |
| GPR6      | 0.006123 | 0.889752 | 0.926607 | 515 | 35  |
| KHK       | 0.006127 | 0.889687 | 0.926599 | 515 | 515 |
| NCRNA0020 | 0.006163 | 0.889038 | 0.926082 | 515 | 493 |
| NUMBL     | 0.006191 | 0.888538 | 0.925632 | 515 | 515 |
| MSTO2P    | 0.00621  | 0.888198 | 0.925374 | 515 | 515 |
| SPDYE6    | 0.006211 | 0.888175 | 0.925374 | 515 | 515 |
| CWF19L2   | 0.006214 | 0.888134 | 0.925374 | 515 | 515 |
| CSRP2     | 0.006229 | 0.887854 | 0.92516  | 515 | 515 |
| OR13C9    | 0.006235 | 0.887744 | 0.925094 | 515 | 5   |
| CDK5RAP2  | 0.006256 | 0.887377 | 0.924841 | 515 | 515 |
| TRAIP     | 0.00629  | 0.886762 | 0.924312 | 515 | 515 |
| CCDC138   | 0.006313 | 0.886348 | 0.923976 | 515 | 515 |
| SNORA71C  | 0.006328 | 0.886081 | 0.923794 | 515 | 47  |
| DDN       | 0.006342 | 0.885837 | 0.923685 | 515 | 507 |
| DDX12     | 0.006361 | 0.885501 | 0.923382 | 515 | 515 |
| COPS3     | 0.00637  | 0.885332 | 0.923351 | 515 | 515 |
| KBTBD3    | 0.006386 | 0.885041 | 0.923192 | 515 | 515 |
| BLM       | 0.006454 | 0.88384  | 0.922275 | 515 | 515 |
| PPARD     | 0.006477 | 0.883421 | 0.921967 | 515 | 515 |
| PRAP1     | 0.006485 | 0.883288 | 0.921893 | 515 | 362 |
| NUDT1     | 0.006487 | 0.883249 | 0.921893 | 515 | 515 |
| RFC2      | 0.006499 | 0.883039 | 0.921777 | 515 | 515 |
| C3orf1    | 0.006516 | 0.882723 | 0.921543 | 515 | 515 |
| UFM1      | 0.006527 | 0.882532 | 0.921392 | 515 | 515 |
| SPDYE7P   | 0.006535 | 0.882391 | 0.9213   | 515 | 513 |
| NGB       | 0.006547 | 0.882181 | 0.921218 | 515 | 189 |
| TPRG1L    | 0.006561 | 0.881917 | 0.92099  | 515 | 515 |
| SLC5A9    | 0.006566 | 0.881835 | 0.920953 | 515 | 510 |
| LETM2     | 0.006585 | 0.8815   | 0.920699 | 515 | 515 |
| MYRIP     | 0.006637 | 0.88056  | 0.920103 | 515 | 514 |
| MAP4K5    | 0.006678 | 0.879827 | 0.919433 | 515 | 515 |
| KRTAP6-3  | 0.006681 | 0.879772 | 0.919433 | 515 | 5   |
| FGF3      | 0.006682 | 0.879768 | 0.919433 | 515 | 136 |
| LIF       | 0.006694 | 0.879552 | 0.919433 | 515 | 515 |
| LOC643955 | 0.006708 | 0.879296 | 0.919214 | 515 | 51  |
| RBM1A3P   | 0.006747 | 0.878592 | 0.918526 | 515 | 4   |
| TMEM215   | 0.006784 | 0.877946 | 0.918043 | 515 | 381 |
| SMAGP     | 0.006804 | 0.877577 | 0.917705 | 515 | 515 |
| CAPN8     | 0.006808 | 0.877515 | 0.917688 | 515 | 513 |
| C14orf181 | 0.006808 | 0.877507 | 0.917688 | 515 | 515 |

|           |          |          |          |     |     |
|-----------|----------|----------|----------|-----|-----|
| CACNA1B   | 0.006817 | 0.877355 | 0.917688 | 515 | 377 |
| KCTD8     | 0.006837 | 0.876994 | 0.917383 | 515 | 288 |
| NIT2      | 0.006855 | 0.876674 | 0.917182 | 515 | 515 |
| STATH     | 0.006861 | 0.876562 | 0.917123 | 515 | 44  |
| PRDM13    | 0.00687  | 0.876406 | 0.917008 | 515 | 247 |
| RGP1      | 0.006877 | 0.876285 | 0.916977 | 515 | 515 |
| SPCS1     | 0.006888 | 0.876078 | 0.916827 | 515 | 515 |
| CEMP1     | 0.006899 | 0.875896 | 0.916781 | 515 | 515 |
| SHC4      | 0.006903 | 0.875809 | 0.916767 | 515 | 513 |
| SPTBN4    | 0.006906 | 0.875757 | 0.916767 | 515 | 515 |
| LOC100133 | 0.00691  | 0.875683 | 0.916767 | 515 | 80  |
| TSPAN16   | 0.006928 | 0.875364 | 0.91659  | 515 | 101 |
| PGM2L1    | 0.00693  | 0.875335 | 0.91659  | 515 | 515 |
| KCTD11    | 0.006933 | 0.875283 | 0.91659  | 515 | 515 |
| AKAP4     | 0.006935 | 0.875238 | 0.91659  | 515 | 44  |
| KIF2C     | 0.006949 | 0.875001 | 0.916402 | 515 | 515 |
| NCOA3     | 0.006955 | 0.874891 | 0.916349 | 515 | 515 |
| CSNK2A2   | 0.006998 | 0.874127 | 0.915678 | 515 | 515 |
| ZBTB5     | 0.007001 | 0.874075 | 0.915672 | 515 | 515 |
| PIGB      | 0.007003 | 0.874035 | 0.915672 | 515 | 515 |
| HOMER3    | 0.007006 | 0.873976 | 0.915664 | 515 | 515 |
| PURB      | 0.007007 | 0.873965 | 0.915664 | 515 | 515 |
| SF3B1     | 0.007022 | 0.873695 | 0.915561 | 515 | 515 |
| LRIG3     | 0.007028 | 0.873586 | 0.915495 | 515 | 515 |
| SPINK7    | 0.007031 | 0.873535 | 0.915495 | 515 | 88  |
| OR52E2    | 0.007052 | 0.873155 | 0.915284 | 515 | 25  |
| TGFBRAP1  | 0.007052 | 0.873152 | 0.915284 | 515 | 515 |
| SMPD2     | 0.007065 | 0.872929 | 0.91519  | 515 | 515 |
| IFT74     | 0.007078 | 0.87269  | 0.91502  | 515 | 515 |
| NTN1      | 0.007103 | 0.872256 | 0.914724 | 515 | 515 |
| DDX17     | 0.007158 | 0.871267 | 0.914043 | 515 | 515 |
| EFCAB10   | 0.007193 | 0.870643 | 0.913542 | 515 | 514 |
| DDX19B    | 0.007225 | 0.870073 | 0.913058 | 515 | 515 |
| RTDR1     | 0.007269 | 0.869292 | 0.912334 | 515 | 472 |
| SNHG1     | 0.007296 | 0.868808 | 0.911922 | 515 | 515 |
| RPL35A    | 0.007323 | 0.868336 | 0.911666 | 515 | 515 |
| MIER2     | 0.007336 | 0.868093 | 0.911459 | 515 | 515 |
| LSM14A    | 0.007362 | 0.867638 | 0.911125 | 515 | 515 |
| GABRA5    | 0.007399 | 0.866977 | 0.91058  | 515 | 190 |
| OR4A16    | 0.007402 | 0.866926 | 0.91058  | 515 | 14  |
| GPR26     | 0.007421 | 0.866578 | 0.910346 | 515 | 218 |
| C14orf148 | 0.007447 | 0.866112 | 0.910143 | 515 | 506 |
| COX18     | 0.007463 | 0.865839 | 0.909905 | 515 | 515 |
| PSMC4     | 0.007483 | 0.865478 | 0.909621 | 515 | 515 |
| PHF1      | 0.007503 | 0.865125 | 0.909373 | 515 | 515 |
| GPR83     | 0.007523 | 0.864762 | 0.909155 | 515 | 491 |
| MDH1      | 0.007532 | 0.864611 | 0.909045 | 515 | 515 |
| LOC730101 | 0.007547 | 0.864331 | 0.908894 | 515 | 515 |
| PRO0611   | 0.007554 | 0.864209 | 0.908861 | 515 | 269 |
| MPV17L    | 0.007576 | 0.863825 | 0.908553 | 515 | 511 |
| SFMBT1    | 0.007583 | 0.863704 | 0.908474 | 515 | 515 |
| GSC       | 0.007591 | 0.863561 | 0.908418 | 515 | 412 |
| NAA15     | 0.007593 | 0.863516 | 0.908418 | 515 | 515 |
| KLHDC10   | 0.007599 | 0.863414 | 0.908359 | 515 | 515 |

|           |          |          |          |     |     |
|-----------|----------|----------|----------|-----|-----|
| ZBTB49    | 0.007604 | 0.863323 | 0.908329 | 515 | 515 |
| SCARNA21  | 0.007609 | 0.863229 | 0.908309 | 515 | 32  |
| TBX1      | 0.00762  | 0.863033 | 0.908149 | 515 | 515 |
| GABPB1    | 0.007651 | 0.86249  | 0.907627 | 515 | 515 |
| CSRNP2    | 0.007671 | 0.862136 | 0.907397 | 515 | 515 |
| GATA2     | 0.007676 | 0.862046 | 0.90735  | 515 | 515 |
| MRRF      | 0.007687 | 0.861844 | 0.907185 | 515 | 515 |
| CPSF4L    | 0.007692 | 0.861756 | 0.90714  | 515 | 119 |
| ERAS      | 0.007713 | 0.861381 | 0.906793 | 515 | 411 |
| RXRA      | 0.007723 | 0.861209 | 0.906707 | 515 | 515 |
| SERPINA12 | 0.007733 | 0.861035 | 0.906638 | 515 | 39  |
| FLJ39739  | 0.007749 | 0.860735 | 0.906448 | 515 | 480 |
| IFNA21    | 0.007794 | 0.859936 | 0.905872 | 515 | 78  |
| FGF18     | 0.007808 | 0.859701 | 0.90574  | 515 | 508 |
| PCP4L1    | 0.007809 | 0.859685 | 0.90574  | 515 | 514 |
| FAM169B   | 0.00781  | 0.859665 | 0.90574  | 515 | 252 |
| STX18     | 0.007811 | 0.859648 | 0.90574  | 515 | 515 |
| TCP10L2   | 0.007817 | 0.859531 | 0.90574  | 515 | 26  |
| VIL1      | 0.007824 | 0.859403 | 0.905682 | 515 | 459 |
| GPR101    | 0.007832 | 0.85926  | 0.905658 | 515 | 20  |
| AGAP7     | 0.007855 | 0.858852 | 0.905371 | 515 | 513 |
| OR52W1    | 0.007862 | 0.858739 | 0.905347 | 515 | 80  |
| ST20      | 0.007876 | 0.858488 | 0.905208 | 515 | 515 |
| KRT26     | 0.007904 | 0.857979 | 0.904776 | 515 | 8   |
| ZNF639    | 0.007926 | 0.857595 | 0.904496 | 515 | 515 |
| FAM66E    | 0.00795  | 0.857162 | 0.904209 | 515 | 290 |
| TMEM95    | 0.007962 | 0.856962 | 0.904046 | 515 | 44  |
| OR52N2    | 0.007973 | 0.856759 | 0.903928 | 515 | 283 |
| SEC14L4   | 0.007984 | 0.856569 | 0.903774 | 515 | 507 |
| LOC642846 | 0.007995 | 0.856363 | 0.903604 | 515 | 515 |
| NAA38     | 0.00803  | 0.855742 | 0.903093 | 515 | 515 |
| MIOX      | 0.008035 | 0.855667 | 0.903061 | 515 | 447 |
| NEUROD6   | 0.00805  | 0.855394 | 0.902868 | 515 | 27  |
| FOXD2     | 0.008053 | 0.855343 | 0.902862 | 515 | 515 |
| IKBKAP    | 0.008066 | 0.855113 | 0.902667 | 515 | 515 |
| SIM1      | 0.008122 | 0.854114 | 0.901755 | 515 | 201 |
| DNAJC25   | 0.008135 | 0.853886 | 0.901562 | 515 | 515 |
| KCNB2     | 0.008138 | 0.853829 | 0.901549 | 515 | 352 |
| DUS4L     | 0.008157 | 0.853493 | 0.901243 | 515 | 515 |
| DMGDH     | 0.008185 | 0.852993 | 0.900857 | 515 | 509 |
| KRTAP10-2 | 0.008192 | 0.852877 | 0.900783 | 515 | 52  |
| SEMA3B    | 0.008241 | 0.852009 | 0.900056 | 515 | 515 |
| SMC6      | 0.008244 | 0.85194  | 0.90003  | 515 | 515 |
| AP1S3     | 0.008264 | 0.851596 | 0.899715 | 515 | 515 |
| PCDHB13   | 0.00829  | 0.851136 | 0.89934  | 515 | 515 |
| MORC4     | 0.008306 | 0.850839 | 0.899153 | 515 | 515 |
| TMTC3     | 0.008321 | 0.85058  | 0.898927 | 515 | 515 |
| MYO15B    | 0.008329 | 0.850438 | 0.898824 | 515 | 515 |
| TBC1D3G   | 0.008335 | 0.850338 | 0.898766 | 515 | 312 |
| KRTAP10-4 | 0.008338 | 0.850284 | 0.898757 | 515 | 20  |
| SNX13     | 0.008351 | 0.850055 | 0.898642 | 515 | 515 |
| TRIP13    | 0.00836  | 0.84988  | 0.898614 | 515 | 515 |
| KCNIP4    | 0.008361 | 0.849869 | 0.898614 | 515 | 515 |
| TEPP      | 0.008411 | 0.848976 | 0.898038 | 515 | 439 |

|           |          |          |          |     |     |
|-----------|----------|----------|----------|-----|-----|
| HAUS7     | 0.008426 | 0.848715 | 0.897952 | 515 | 515 |
| METTL2B   | 0.008428 | 0.84869  | 0.897952 | 515 | 515 |
| KIF7      | 0.008438 | 0.848509 | 0.89783  | 515 | 515 |
| C20orf27  | 0.008444 | 0.848407 | 0.897787 | 515 | 515 |
| RBM15     | 0.008473 | 0.84789  | 0.897364 | 515 | 515 |
| ANKRD56   | 0.008511 | 0.847211 | 0.896836 | 515 | 514 |
| C1QL3     | 0.008513 | 0.847168 | 0.896836 | 515 | 502 |
| SLC17A4   | 0.008521 | 0.847032 | 0.896789 | 515 | 144 |
| REEP4     | 0.008523 | 0.847001 | 0.896789 | 515 | 515 |
| ATP6V0A1  | 0.008542 | 0.846653 | 0.896577 | 515 | 515 |
| KIF24     | 0.008574 | 0.846087 | 0.896227 | 515 | 515 |
| ABCC5     | 0.008579 | 0.846007 | 0.896226 | 515 | 515 |
| NR1H4     | 0.008589 | 0.845826 | 0.896176 | 515 | 306 |
| GJA8      | 0.008639 | 0.844945 | 0.895291 | 515 | 35  |
| TUBD1     | 0.008643 | 0.844872 | 0.895291 | 515 | 515 |
| KLHL20    | 0.008648 | 0.844775 | 0.895291 | 515 | 515 |
| CCNB1     | 0.008693 | 0.843992 | 0.89466  | 515 | 515 |
| ALX4      | 0.008693 | 0.843979 | 0.89466  | 515 | 159 |
| HEXA      | 0.008757 | 0.842846 | 0.893682 | 515 | 515 |
| SEC61B    | 0.00879  | 0.842261 | 0.893204 | 515 | 515 |
| JMJD6     | 0.008826 | 0.841623 | 0.89267  | 515 | 515 |
| LOC147727 | 0.00886  | 0.841031 | 0.892231 | 515 | 515 |
| ZNF648    | 0.00886  | 0.84102  | 0.892231 | 515 | 344 |
| MRPL39    | 0.008869 | 0.840863 | 0.892148 | 515 | 515 |
| SEC16B    | 0.008941 | 0.839598 | 0.891042 | 515 | 515 |
| XKR5      | 0.008957 | 0.839304 | 0.890777 | 515 | 424 |
| CGB       | 0.00897  | 0.83908  | 0.890587 | 515 | 355 |
| C7orf44   | 0.008973 | 0.839018 | 0.890587 | 515 | 515 |
| SLC04C1   | 0.008974 | 0.839014 | 0.890587 | 515 | 515 |
| LIX1      | 0.008985 | 0.838812 | 0.890492 | 515 | 381 |
| GHRH      | 0.009004 | 0.838482 | 0.890188 | 515 | 14  |
| ARSF      | 0.009014 | 0.838294 | 0.890036 | 515 | 255 |
| ATG16L1   | 0.009016 | 0.838264 | 0.890036 | 515 | 515 |
| GABPB2    | 0.009037 | 0.837898 | 0.889805 | 515 | 515 |
| KIAA0430  | 0.00904  | 0.837848 | 0.889799 | 515 | 515 |
| PCDHGA3   | 0.009078 | 0.837174 | 0.889272 | 515 | 509 |
| OR6M1     | 0.009144 | 0.836001 | 0.888215 | 515 | 7   |
| PATE4     | 0.009148 | 0.835933 | 0.888189 | 515 | 146 |
| RBM27     | 0.009182 | 0.835336 | 0.887603 | 515 | 515 |
| DENND4B   | 0.009201 | 0.834988 | 0.887327 | 515 | 515 |
| EGF       | 0.009205 | 0.834924 | 0.887306 | 515 | 514 |
| GPR37     | 0.009229 | 0.834499 | 0.887111 | 515 | 515 |
| ZCCHC17   | 0.009255 | 0.834047 | 0.886704 | 515 | 515 |
| IGFL4     | 0.009256 | 0.834024 | 0.886704 | 515 | 131 |
| PLAC1L    | 0.00927  | 0.833774 | 0.886542 | 515 | 4   |
| NOS1      | 0.009271 | 0.833765 | 0.886542 | 515 | 404 |
| UBE2D4    | 0.009277 | 0.833652 | 0.88652  | 515 | 515 |
| SH2B2     | 0.00929  | 0.833416 | 0.886364 | 515 | 515 |
| FNDC1     | 0.009293 | 0.833361 | 0.886352 | 515 | 515 |
| SLC43A2   | 0.009313 | 0.833019 | 0.886036 | 515 | 515 |
| NOX5      | 0.009315 | 0.832984 | 0.886036 | 515 | 476 |
| C13orf29  | 0.009335 | 0.832624 | 0.885758 | 515 | 515 |
| TRA2B     | 0.009349 | 0.83237  | 0.885628 | 515 | 515 |
| PLA2G3    | 0.009384 | 0.831758 | 0.885119 | 515 | 475 |

|           |          |          |          |     |     |
|-----------|----------|----------|----------|-----|-----|
| FAM69C    | 0.009417 | 0.831177 | 0.884641 | 515 | 323 |
| CDC45     | 0.00942  | 0.831126 | 0.884634 | 515 | 515 |
| PCBD2     | 0.009429 | 0.830969 | 0.884515 | 515 | 515 |
| ANKRD31   | 0.009435 | 0.830861 | 0.884447 | 515 | 401 |
| SMAD3     | 0.009478 | 0.830109 | 0.883835 | 515 | 515 |
| NXF5      | 0.009483 | 0.830008 | 0.883774 | 515 | 125 |
| OSTC      | 0.009557 | 0.828707 | 0.882906 | 515 | 515 |
| ARHGAP11A | 0.009571 | 0.82846  | 0.882737 | 515 | 515 |
| C13orf38  | 0.009591 | 0.828113 | 0.882461 | 515 | 495 |
| LOC339047 | 0.009598 | 0.827988 | 0.882375 | 515 | 515 |
| ZNF721    | 0.009617 | 0.827643 | 0.882101 | 515 | 515 |
| RANBP17   | 0.009623 | 0.827539 | 0.882037 | 515 | 515 |
| SMARCAL1  | 0.009624 | 0.827519 | 0.882037 | 515 | 515 |
| SBNO1     | 0.009632 | 0.827384 | 0.882013 | 515 | 515 |
| HSPA1L    | 0.009654 | 0.82699  | 0.881823 | 515 | 515 |
| CRIP1     | 0.009696 | 0.826257 | 0.881094 | 515 | 515 |
| IGFBP1    | 0.00972  | 0.825831 | 0.880687 | 515 | 413 |
| FAM22G    | 0.009742 | 0.82545  | 0.880327 | 515 | 496 |
| NGFRAP1   | 0.009752 | 0.825263 | 0.880175 | 515 | 515 |
| TIMM9     | 0.009752 | 0.825258 | 0.880175 | 515 | 515 |
| SLC9A5    | 0.009765 | 0.825042 | 0.880127 | 515 | 515 |
| B4GALNT3  | 0.009767 | 0.824995 | 0.880123 | 515 | 515 |
| NBPF7     | 0.009771 | 0.824938 | 0.88011  | 515 | 418 |
| B3GALTL   | 0.009773 | 0.824902 | 0.88011  | 515 | 515 |
| OR2W1     | 0.009774 | 0.824872 | 0.88011  | 515 | 5   |
| LOC201651 | 0.009778 | 0.824808 | 0.88011  | 515 | 477 |
| MED14     | 0.009794 | 0.824519 | 0.879851 | 515 | 515 |
| OR10G3    | 0.009844 | 0.823653 | 0.87902  | 515 | 10  |
| HSN2      | 0.009864 | 0.823301 | 0.878785 | 515 | 515 |
| HGC6.3    | 0.009881 | 0.823    | 0.878511 | 515 | 373 |
| PPM1A     | 0.009885 | 0.822931 | 0.878484 | 515 | 515 |
| ARID3C    | 0.009887 | 0.822888 | 0.878484 | 515 | 255 |
| TNNT2     | 0.009911 | 0.822465 | 0.878128 | 515 | 504 |
| MAGI3     | 0.009914 | 0.822405 | 0.878119 | 515 | 515 |
| PIWIL2    | 0.009921 | 0.82228  | 0.878118 | 515 | 431 |
| WWOX      | 0.009954 | 0.821707 | 0.877647 | 515 | 515 |
| ARL17A    | 0.009959 | 0.821612 | 0.877592 | 515 | 515 |
| METTL10   | 0.009964 | 0.821531 | 0.877592 | 515 | 515 |
| IZUMO1    | 0.009987 | 0.821121 | 0.877255 | 515 | 302 |
| DCAF4     | 0.009991 | 0.821057 | 0.877233 | 515 | 515 |
| KCNS3     | 0.009996 | 0.820975 | 0.877193 | 515 | 515 |
| KRT16     | 0.010004 | 0.820834 | 0.877136 | 515 | 495 |
| MRPL42P5  | 0.010007 | 0.820777 | 0.877122 | 515 | 503 |
| LRRC69    | 0.01002  | 0.820538 | 0.876913 | 515 | 485 |
| UNC50     | 0.010025 | 0.820454 | 0.87687  | 515 | 515 |
| SNORA58   | 0.010076 | 0.819565 | 0.876155 | 515 | 4   |
| LOC100130 | 0.010077 | 0.81954  | 0.876155 | 515 | 515 |
| TMSB15A   | 0.010086 | 0.819377 | 0.876083 | 515 | 510 |
| TTYH1     | 0.010112 | 0.818921 | 0.875841 | 515 | 500 |
| RADIL     | 0.010125 | 0.818695 | 0.875693 | 515 | 515 |
| GOLGA6C   | 0.010143 | 0.818373 | 0.875396 | 515 | 55  |
| SLC13A1   | 0.010183 | 0.817686 | 0.874895 | 515 | 55  |
| C9orf37   | 0.010184 | 0.817654 | 0.874895 | 515 | 515 |
| MAGI2     | 0.010189 | 0.817577 | 0.874872 | 515 | 515 |

|           |          |          |          |     |     |
|-----------|----------|----------|----------|-----|-----|
| ZNF433    | 0.010199 | 0.8174   | 0.874775 | 515 | 515 |
| GSTA5     | 0.010203 | 0.817332 | 0.874775 | 515 | 229 |
| PMS2L2    | 0.010228 | 0.816883 | 0.874503 | 515 | 515 |
| LCE3D     | 0.010242 | 0.816636 | 0.874333 | 515 | 62  |
| EIF3G     | 0.010251 | 0.816485 | 0.874218 | 515 | 515 |
| SNORA41   | 0.010262 | 0.816294 | 0.874154 | 515 | 24  |
| PI4KAP1   | 0.010275 | 0.816053 | 0.873943 | 515 | 515 |
| ZNF614    | 0.010314 | 0.815376 | 0.873358 | 515 | 515 |
| SLC12A4   | 0.010315 | 0.815351 | 0.873358 | 515 | 515 |
| HRASLS2   | 0.010325 | 0.81518  | 0.873242 | 515 | 490 |
| CYP26C1   | 0.010334 | 0.815016 | 0.873159 | 515 | 288 |
| FBXW12    | 0.010353 | 0.814686 | 0.872899 | 515 | 54  |
| RPS6KA6   | 0.010411 | 0.813676 | 0.872051 | 515 | 488 |
| NCAPH2    | 0.010414 | 0.813608 | 0.872025 | 515 | 515 |
| C7orf61   | 0.010426 | 0.813406 | 0.871855 | 515 | 512 |
| ATP6V1C1  | 0.010427 | 0.813389 | 0.871855 | 515 | 515 |
| FAM73B    | 0.010428 | 0.813364 | 0.871855 | 515 | 515 |
| TRIM7     | 0.01043  | 0.81333  | 0.871855 | 515 | 515 |
| C14orf45  | 0.01044  | 0.813164 | 0.871783 | 515 | 515 |
| NLGN2     | 0.010462 | 0.812766 | 0.871583 | 515 | 515 |
| GGT1      | 0.010481 | 0.812444 | 0.871385 | 515 | 515 |
| PDPK1     | 0.010487 | 0.812336 | 0.871348 | 515 | 515 |
| THSD1P1   | 0.010503 | 0.812051 | 0.871198 | 515 | 515 |
| CYP11B1   | 0.010552 | 0.811196 | 0.870373 | 515 | 61  |
| C19orf70  | 0.010555 | 0.811145 | 0.870366 | 515 | 515 |
| TMTC1     | 0.010628 | 0.809851 | 0.869257 | 515 | 515 |
| CDK5R2    | 0.010678 | 0.808978 | 0.868542 | 515 | 456 |
| PWRN1     | 0.01068  | 0.808948 | 0.868542 | 515 | 75  |
| ABCB9     | 0.010724 | 0.808181 | 0.868023 | 515 | 515 |
| GCC2      | 0.010725 | 0.808158 | 0.868023 | 515 | 515 |
| SAMD7     | 0.010731 | 0.808055 | 0.867982 | 515 | 94  |
| RNF212    | 0.010754 | 0.807647 | 0.867636 | 515 | 514 |
| C14orf4   | 0.010763 | 0.807493 | 0.867518 | 515 | 515 |
| TAS2R42   | 0.010767 | 0.807414 | 0.86748  | 515 | 137 |
| ZNF766    | 0.010827 | 0.806371 | 0.866591 | 515 | 515 |
| PLCD3     | 0.010828 | 0.806349 | 0.866591 | 515 | 515 |
| RABL3     | 0.010847 | 0.806026 | 0.866314 | 515 | 515 |
| LOC727677 | 0.010853 | 0.805904 | 0.866276 | 515 | 12  |
| GPR12     | 0.010865 | 0.805697 | 0.866148 | 515 | 304 |
| TOMM7     | 0.010866 | 0.805681 | 0.866148 | 515 | 515 |
| DNAH2     | 0.010873 | 0.805564 | 0.866097 | 515 | 515 |
| RPS19     | 0.010903 | 0.805036 | 0.865716 | 515 | 515 |
| TINAG     | 0.010939 | 0.80441  | 0.865136 | 515 | 280 |
| DAD1L     | 0.010959 | 0.804049 | 0.864841 | 515 | 235 |
| TRIP10    | 0.010972 | 0.803824 | 0.864692 | 515 | 515 |
| NKX2-1    | 0.011033 | 0.802757 | 0.863817 | 515 | 515 |
| RBM25     | 0.011048 | 0.802492 | 0.863591 | 515 | 515 |
| TRPC5     | 0.01105  | 0.802457 | 0.863591 | 515 | 197 |
| CWF19L1   | 0.011052 | 0.802431 | 0.863591 | 515 | 515 |
| TAC4      | 0.011065 | 0.802201 | 0.863457 | 515 | 411 |
| RARS      | 0.011083 | 0.801892 | 0.863217 | 515 | 515 |
| IPW       | 0.011089 | 0.801782 | 0.863145 | 515 | 515 |
| FRK       | 0.011119 | 0.801256 | 0.862672 | 515 | 515 |
| PAPPA     | 0.011142 | 0.800857 | 0.862381 | 515 | 515 |



|           |          |          |          |     |     |
|-----------|----------|----------|----------|-----|-----|
| DHRS3     | 0.01115  | 0.800714 | 0.862275 | 515 | 515 |
| TCP1      | 0.011153 | 0.800657 | 0.862259 | 515 | 515 |
| LOC286135 | 0.011187 | 0.800059 | 0.861711 | 515 | 28  |
| PMS2L11   | 0.01119  | 0.800009 | 0.861711 | 515 | 514 |
| TNS1      | 0.011219 | 0.799497 | 0.861382 | 515 | 515 |
| TCTEX1D2  | 0.011228 | 0.799339 | 0.861273 | 515 | 515 |
| TFDP2     | 0.011237 | 0.799186 | 0.861232 | 515 | 515 |
| ATCAY     | 0.011254 | 0.798899 | 0.861015 | 515 | 203 |
| SERINC3   | 0.011256 | 0.798855 | 0.861015 | 515 | 515 |
| DNAJB8    | 0.011256 | 0.798852 | 0.861015 | 515 | 40  |
| AURKB     | 0.011283 | 0.798392 | 0.860655 | 515 | 515 |
| HMG20A    | 0.011302 | 0.798061 | 0.860391 | 515 | 515 |
| ATP2B1    | 0.011303 | 0.798033 | 0.860391 | 515 | 515 |
| LOC100132 | 0.011305 | 0.798007 | 0.860391 | 515 | 506 |
| PPAPDC2   | 0.011328 | 0.797603 | 0.860129 | 515 | 515 |
| ACTA1     | 0.011333 | 0.797512 | 0.860077 | 515 | 501 |
| NPAS2     | 0.011343 | 0.797335 | 0.859977 | 515 | 515 |
| GOLGA6A   | 0.01135  | 0.797218 | 0.859899 | 515 | 196 |
| TMEM74    | 0.011369 | 0.796883 | 0.859677 | 515 | 488 |
| ACOT6     | 0.01142  | 0.795983 | 0.858818 | 515 | 441 |
| ADCY1     | 0.011435 | 0.795726 | 0.85866  | 515 | 515 |
| SCGBL     | 0.011438 | 0.795678 | 0.858655 | 515 | 300 |
| MINPP1    | 0.01145  | 0.795469 | 0.858476 | 515 | 515 |
| PI4KA     | 0.011511 | 0.794401 | 0.857601 | 515 | 515 |
| SPINT3    | 0.011515 | 0.794327 | 0.857568 | 515 | 10  |
| APC2      | 0.011517 | 0.794305 | 0.857568 | 515 | 514 |
| C12orf45  | 0.011524 | 0.794166 | 0.857486 | 515 | 515 |
| FXC1      | 0.01154  | 0.793896 | 0.857334 | 515 | 515 |
| ACSF2     | 0.011548 | 0.793753 | 0.857272 | 515 | 515 |
| OC90      | 0.011552 | 0.793681 | 0.85724  | 515 | 82  |
| TSPAN7    | 0.011585 | 0.793101 | 0.856846 | 515 | 515 |
| BCL2L12   | 0.011588 | 0.793064 | 0.856846 | 515 | 515 |
| STMN1     | 0.011643 | 0.792101 | 0.855996 | 515 | 515 |
| LOC285033 | 0.011643 | 0.792093 | 0.855996 | 515 | 515 |
| LOC388387 | 0.011663 | 0.791755 | 0.855761 | 515 | 265 |
| MT1B      | 0.01168  | 0.791456 | 0.85553  | 515 | 26  |
| AKAP13    | 0.011682 | 0.791421 | 0.85553  | 515 | 515 |
| DSCC1     | 0.011685 | 0.79137  | 0.85553  | 515 | 515 |
| NUF2      | 0.011701 | 0.791091 | 0.855339 | 515 | 515 |
| SUZ12     | 0.011718 | 0.790787 | 0.855131 | 515 | 515 |
| DCTPP1    | 0.011753 | 0.790182 | 0.854663 | 515 | 515 |
| RYBP      | 0.011782 | 0.789669 | 0.8542   | 515 | 515 |
| TSGA13    | 0.011793 | 0.789484 | 0.854045 | 515 | 87  |
| BAI1      | 0.011794 | 0.789456 | 0.854045 | 515 | 512 |
| OR10A6    | 0.011805 | 0.789275 | 0.853912 | 515 | 30  |
| GRM6      | 0.011806 | 0.789251 | 0.853912 | 515 | 476 |
| RUFY1     | 0.011833 | 0.788785 | 0.853551 | 515 | 515 |
| MPPE1     | 0.011842 | 0.788625 | 0.85344  | 515 | 515 |
| C9orf125  | 0.011894 | 0.787717 | 0.853104 | 515 | 515 |
| CXorf26   | 0.011933 | 0.78704  | 0.852509 | 515 | 515 |
| CSDAP1    | 0.011933 | 0.787038 | 0.852509 | 515 | 515 |
| CRLS1     | 0.011961 | 0.786552 | 0.85212  | 515 | 515 |
| ESPL1     | 0.012008 | 0.785734 | 0.851463 | 515 | 515 |
| OR52I2    | 0.012032 | 0.785315 | 0.851079 | 515 | 78  |

|           |          |          |          |     |     |
|-----------|----------|----------|----------|-----|-----|
| CDK9      | 0.012038 | 0.785221 | 0.851074 | 515 | 515 |
| ITGB5     | 0.012048 | 0.785035 | 0.850938 | 515 | 515 |
| KCNC1     | 0.012058 | 0.784866 | 0.850846 | 515 | 375 |
| GFRAL     | 0.012059 | 0.784843 | 0.850846 | 515 | 15  |
| ABCB10    | 0.012077 | 0.784536 | 0.850627 | 515 | 515 |
| SNORD116- | 0.012085 | 0.78439  | 0.850607 | 515 | 486 |
| TMEFF1    | 0.012099 | 0.784159 | 0.850425 | 515 | 515 |
| ZNF322A   | 0.012111 | 0.783938 | 0.850348 | 515 | 515 |
| MFAP3L    | 0.012121 | 0.783764 | 0.850205 | 515 | 515 |
| C10orf62  | 0.012121 | 0.783762 | 0.850205 | 515 | 135 |
| BOK       | 0.012142 | 0.783402 | 0.84995  | 515 | 515 |
| BAALC     | 0.012156 | 0.783162 | 0.849737 | 515 | 515 |
| LOC643677 | 0.012174 | 0.782852 | 0.849446 | 515 | 438 |
| PCDHA10   | 0.012181 | 0.782718 | 0.849347 | 515 | 503 |
| POLR2D    | 0.012184 | 0.78267  | 0.849341 | 515 | 515 |
| SPAM1     | 0.012188 | 0.782609 | 0.849333 | 515 | 28  |
| XRCC2     | 0.012198 | 0.782431 | 0.84922  | 515 | 515 |
| MAP3K15   | 0.012204 | 0.782329 | 0.849155 | 515 | 428 |
| ACOT1     | 0.01221  | 0.782213 | 0.849076 | 515 | 515 |
| FOXL2     | 0.012214 | 0.782147 | 0.849071 | 515 | 254 |
| ST5       | 0.012248 | 0.781557 | 0.848532 | 515 | 515 |
| EPHX2     | 0.012251 | 0.781501 | 0.848532 | 515 | 515 |
| ALB       | 0.012283 | 0.780945 | 0.84816  | 515 | 439 |
| IFNA1     | 0.012303 | 0.780612 | 0.84789  | 515 | 57  |
| ZNF485    | 0.012306 | 0.780553 | 0.847878 | 515 | 515 |
| SLC45A1   | 0.012335 | 0.78005  | 0.847464 | 515 | 515 |
| C16orf57  | 0.01236  | 0.779618 | 0.847087 | 515 | 515 |
| C9orf69   | 0.012362 | 0.779576 | 0.847087 | 515 | 515 |
| CNN2      | 0.012368 | 0.779473 | 0.847022 | 515 | 515 |
| PHC2      | 0.012381 | 0.779247 | 0.846821 | 515 | 515 |
| LOC493754 | 0.012389 | 0.779105 | 0.846805 | 515 | 515 |
| LOC650623 | 0.012424 | 0.778497 | 0.84625  | 515 | 515 |
| C2orf7    | 0.012463 | 0.777817 | 0.845635 | 515 | 515 |
| GPR116    | 0.012469 | 0.777715 | 0.84557  | 515 | 515 |
| CENPM     | 0.012505 | 0.777092 | 0.845215 | 515 | 515 |
| UCA1      | 0.012505 | 0.777089 | 0.845215 | 515 | 473 |
| APOB      | 0.012527 | 0.776714 | 0.844988 | 515 | 470 |
| LHX9      | 0.012531 | 0.776637 | 0.84495  | 515 | 461 |
| PRG3      | 0.012552 | 0.776282 | 0.844748 | 515 | 13  |
| ITPKC     | 0.012557 | 0.776191 | 0.844694 | 515 | 515 |
| C15orf52  | 0.01257  | 0.775968 | 0.844498 | 515 | 515 |
| CDCA4     | 0.012587 | 0.775675 | 0.844271 | 515 | 515 |
| SERPINA4  | 0.012593 | 0.775572 | 0.844205 | 515 | 346 |
| ABCB11    | 0.012606 | 0.775339 | 0.844043 | 515 | 342 |
| OTOP2     | 0.012629 | 0.774947 | 0.843728 | 515 | 123 |
| SENP1     | 0.012655 | 0.774496 | 0.843355 | 515 | 515 |
| SNAPC3    | 0.012661 | 0.774388 | 0.843329 | 515 | 515 |
| ZCRB1     | 0.012664 | 0.774346 | 0.843329 | 515 | 515 |
| ZNF434    | 0.012688 | 0.77392  | 0.842958 | 515 | 515 |
| ATXN3L    | 0.012733 | 0.773136 | 0.842149 | 515 | 15  |
| VSTM2B    | 0.012734 | 0.773133 | 0.842149 | 515 | 31  |
| LYZL1     | 0.012739 | 0.773035 | 0.842132 | 515 | 14  |
| KLK2      | 0.012744 | 0.772947 | 0.842081 | 515 | 265 |
| NICN1     | 0.012752 | 0.772817 | 0.841985 | 515 | 515 |

|           |          |          |          |     |     |
|-----------|----------|----------|----------|-----|-----|
| TEX2      | 0.012777 | 0.772375 | 0.841688 | 515 | 515 |
| SLPI      | 0.012811 | 0.771791 | 0.841234 | 515 | 515 |
| ACD       | 0.012841 | 0.771275 | 0.840718 | 515 | 515 |
| OPN4      | 0.012844 | 0.771213 | 0.840696 | 515 | 229 |
| GPR172B   | 0.012846 | 0.771177 | 0.840696 | 515 | 513 |
| SHF       | 0.012874 | 0.770702 | 0.840368 | 515 | 515 |
| SNORA36A  | 0.012905 | 0.770162 | 0.839825 | 515 | 5   |
| PHC1      | 0.012917 | 0.769953 | 0.839644 | 515 | 515 |
| NUDT4     | 0.012929 | 0.769752 | 0.839469 | 515 | 515 |
| RPE65     | 0.013002 | 0.768476 | 0.838262 | 515 | 208 |
| PI3       | 0.013005 | 0.768432 | 0.838259 | 515 | 510 |
| ARPC5L    | 0.013015 | 0.768267 | 0.838191 | 515 | 515 |
| FOXD4     | 0.013022 | 0.768132 | 0.838114 | 515 | 510 |
| ASS1      | 0.013023 | 0.768114 | 0.838114 | 515 | 515 |
| C3orf52   | 0.013037 | 0.767883 | 0.838026 | 515 | 515 |
| LOC100129 | 0.013083 | 0.767076 | 0.83745  | 515 | 227 |
| KBTBD12   | 0.013084 | 0.767058 | 0.83745  | 515 | 498 |
| NAA10     | 0.01309  | 0.766963 | 0.83745  | 515 | 515 |
| ZNF675    | 0.013109 | 0.766632 | 0.837209 | 515 | 515 |
| CYP20A1   | 0.013158 | 0.765788 | 0.836516 | 515 | 515 |
| AKR1CL1   | 0.013178 | 0.765434 | 0.836175 | 515 | 170 |
| ZNF674    | 0.01318  | 0.765416 | 0.836175 | 515 | 515 |
| TXNL4B    | 0.013188 | 0.765261 | 0.836123 | 515 | 515 |
| MCM2      | 0.013197 | 0.765113 | 0.836098 | 515 | 515 |
| GATA4     | 0.013205 | 0.764975 | 0.836039 | 515 | 320 |
| TMOD3     | 0.013215 | 0.764799 | 0.835938 | 515 | 515 |
| NETO2     | 0.013237 | 0.764419 | 0.835599 | 515 | 515 |
| OR10A3    | 0.013259 | 0.764043 | 0.83534  | 515 | 53  |
| ARFRP1    | 0.013259 | 0.764039 | 0.83534  | 515 | 515 |
| KLHDC5    | 0.013262 | 0.763994 | 0.83534  | 515 | 515 |
| C14orf180 | 0.013262 | 0.763991 | 0.83534  | 515 | 302 |
| CDC6      | 0.013284 | 0.763619 | 0.835197 | 515 | 515 |
| PAK1      | 0.013286 | 0.763581 | 0.835197 | 515 | 515 |
| GPN3      | 0.013298 | 0.763371 | 0.835028 | 515 | 515 |
| TPH1      | 0.013302 | 0.763293 | 0.835023 | 515 | 445 |
| NSL1      | 0.013323 | 0.762931 | 0.834718 | 515 | 515 |
| HSPB6     | 0.013345 | 0.762555 | 0.834422 | 515 | 515 |
| SIX3      | 0.013345 | 0.76255  | 0.834422 | 515 | 337 |
| CYP1A2    | 0.013375 | 0.762043 | 0.834109 | 515 | 247 |
| DEK       | 0.013386 | 0.761849 | 0.833991 | 515 | 515 |
| PVT1      | 0.013391 | 0.761765 | 0.833944 | 515 | 515 |
| SYCN      | 0.013423 | 0.761218 | 0.833483 | 515 | 39  |
| CDC42EP5  | 0.013434 | 0.76102  | 0.833394 | 515 | 515 |
| PDK4      | 0.013481 | 0.760211 | 0.832699 | 515 | 515 |
| SH3GL2    | 0.013485 | 0.760142 | 0.832669 | 515 | 443 |
| CCDC126   | 0.013491 | 0.760038 | 0.832601 | 515 | 515 |
| ZNHIT6    | 0.013495 | 0.759965 | 0.832566 | 515 | 515 |
| KRTAP1-1  | 0.013497 | 0.759938 | 0.832566 | 515 | 110 |
| LPO       | 0.013508 | 0.759751 | 0.832424 | 515 | 462 |
| GTF2IRD2F | 0.013527 | 0.759423 | 0.832155 | 515 | 515 |
| ACSS1     | 0.013556 | 0.758924 | 0.8317   | 515 | 515 |
| SLC27A1   | 0.013587 | 0.758378 | 0.831193 | 515 | 515 |
| C17orf59  | 0.013603 | 0.758111 | 0.831036 | 515 | 515 |
| SEPT7P2   | 0.013625 | 0.757725 | 0.83075  | 515 | 515 |

|           |          |          |          |     |     |
|-----------|----------|----------|----------|-----|-----|
| CRX       | 0.013631 | 0.757618 | 0.830724 | 515 | 34  |
| GOLGA2P3  | 0.013635 | 0.757565 | 0.830711 | 515 | 6   |
| MYL10     | 0.01364  | 0.757474 | 0.830702 | 515 | 29  |
| RDH12     | 0.013645 | 0.757394 | 0.830702 | 515 | 480 |
| PATE2     | 0.013683 | 0.756727 | 0.830157 | 515 | 180 |
| SLC25A20  | 0.013686 | 0.756678 | 0.830149 | 515 | 515 |
| SLC38A2   | 0.013728 | 0.755954 | 0.829446 | 515 | 515 |
| OR1L3     | 0.013729 | 0.755947 | 0.829446 | 515 | 28  |
| MKL2      | 0.013763 | 0.75535  | 0.82892  | 515 | 515 |
| LRRC37A4  | 0.013765 | 0.755318 | 0.82892  | 515 | 515 |
| MRGPRX3   | 0.013808 | 0.754573 | 0.828249 | 515 | 130 |
| LCE2B     | 0.013816 | 0.754441 | 0.828149 | 515 | 5   |
| MFN1      | 0.013826 | 0.754272 | 0.828009 | 515 | 515 |
| C16orf61  | 0.013862 | 0.753649 | 0.827461 | 515 | 515 |
| OLIG1     | 0.013883 | 0.753288 | 0.827111 | 515 | 454 |
| SON       | 0.013883 | 0.753285 | 0.827111 | 515 | 515 |
| TMPRSS11E | 0.013892 | 0.753143 | 0.827042 | 515 | 324 |
| SULT1B1   | 0.013897 | 0.753045 | 0.82698  | 515 | 441 |
| INE1      | 0.013935 | 0.752403 | 0.826365 | 515 | 515 |
| C3P1      | 0.013954 | 0.752065 | 0.826086 | 515 | 36  |
| HIVEP1    | 0.014017 | 0.750981 | 0.825167 | 515 | 515 |
| RBMXL3    | 0.014038 | 0.750627 | 0.824823 | 515 | 19  |
| POP1      | 0.014091 | 0.74971  | 0.823951 | 515 | 515 |
| TATDN3    | 0.014105 | 0.74948  | 0.82379  | 515 | 515 |
| PTPLB     | 0.01411  | 0.749395 | 0.823741 | 515 | 515 |
| SEZ6      | 0.014143 | 0.748824 | 0.823273 | 515 | 339 |
| ZNF23     | 0.014154 | 0.748642 | 0.82314  | 515 | 515 |
| PNLDC1    | 0.014173 | 0.748313 | 0.822824 | 515 | 356 |
| FLJ46361  | 0.014208 | 0.747702 | 0.822197 | 515 | 16  |
| RPL39     | 0.014212 | 0.747636 | 0.822197 | 515 | 515 |
| PSG6      | 0.014233 | 0.747276 | 0.821863 | 515 | 74  |
| SENP6     | 0.014241 | 0.747142 | 0.821762 | 515 | 515 |
| AIDA      | 0.01425  | 0.746993 | 0.821733 | 515 | 515 |
| ZSWIM4    | 0.014282 | 0.746435 | 0.82121  | 515 | 515 |
| OR1J1     | 0.014283 | 0.74642  | 0.82121  | 515 | 168 |
| GOLGA8F   | 0.014299 | 0.746146 | 0.820982 | 515 | 15  |
| USP1      | 0.014306 | 0.746024 | 0.820939 | 515 | 515 |
| FLJ10213  | 0.014341 | 0.745429 | 0.820419 | 515 | 514 |
| SURF1     | 0.014369 | 0.744941 | 0.820063 | 515 | 515 |
| PGLYRP3   | 0.014393 | 0.744536 | 0.819752 | 515 | 345 |
| VPS41     | 0.014408 | 0.744271 | 0.819657 | 515 | 515 |
| AMDHD1    | 0.014411 | 0.744225 | 0.819657 | 515 | 509 |
| FBL       | 0.014437 | 0.743784 | 0.819376 | 515 | 515 |
| PCDHGC4   | 0.014442 | 0.743701 | 0.81933  | 515 | 476 |
| LOC400027 | 0.014445 | 0.743644 | 0.819312 | 515 | 515 |
| GSTM1     | 0.014467 | 0.743276 | 0.818996 | 515 | 462 |
| LOC91316  | 0.014489 | 0.7429   | 0.818673 | 515 | 515 |
| ADPRHL2   | 0.014502 | 0.742662 | 0.818455 | 515 | 515 |
| KIAA1409  | 0.014514 | 0.742456 | 0.818289 | 515 | 499 |
| HERC2P2   | 0.014515 | 0.742452 | 0.818289 | 515 | 515 |
| SPDYE5    | 0.014515 | 0.742446 | 0.818289 | 515 | 513 |
| AMZ2      | 0.014524 | 0.742288 | 0.818289 | 515 | 515 |
| FSHB      | 0.014527 | 0.742235 | 0.818289 | 515 | 13  |
| SLC22A12  | 0.01454  | 0.742025 | 0.81816  | 515 | 35  |

|           |          |          |          |     |     |
|-----------|----------|----------|----------|-----|-----|
| DNM2      | 0.014559 | 0.741695 | 0.817886 | 515 | 515 |
| NTSR2     | 0.014572 | 0.741465 | 0.817677 | 515 | 108 |
| SMU1      | 0.014603 | 0.740941 | 0.81719  | 515 | 515 |
| CRKL      | 0.014624 | 0.740575 | 0.816921 | 515 | 515 |
| PAX6      | 0.014643 | 0.740251 | 0.816609 | 515 | 515 |
| ZNF479    | 0.014662 | 0.739932 | 0.816347 | 515 | 68  |
| LOC253039 | 0.014662 | 0.739928 | 0.816347 | 515 | 515 |
| OR51G2    | 0.014676 | 0.739698 | 0.816179 | 515 | 8   |
| SLC24A6   | 0.014721 | 0.73892  | 0.815636 | 515 | 515 |
| LOC400804 | 0.014744 | 0.738533 | 0.815434 | 515 | 274 |
| NUCB1     | 0.014767 | 0.73813  | 0.815079 | 515 | 515 |
| GDA       | 0.014768 | 0.73812  | 0.815079 | 515 | 456 |
| NHEJ1     | 0.014789 | 0.737768 | 0.814814 | 515 | 515 |
| FAM72A    | 0.01479  | 0.73775  | 0.814814 | 515 | 513 |
| ASTN2     | 0.014791 | 0.737721 | 0.814814 | 515 | 515 |
| RAD50     | 0.014814 | 0.737341 | 0.814522 | 515 | 515 |
| CYLC2     | 0.014819 | 0.737242 | 0.814458 | 515 | 7   |
| AMPD2     | 0.014845 | 0.736812 | 0.814109 | 515 | 515 |
| IL1F10    | 0.014853 | 0.736663 | 0.813998 | 515 | 128 |
| CHAF1A    | 0.014872 | 0.736347 | 0.813739 | 515 | 515 |
| C9orf68   | 0.014872 | 0.736339 | 0.813739 | 515 | 515 |
| PARD6G    | 0.014878 | 0.736243 | 0.813739 | 515 | 515 |
| C17orf96  | 0.01488  | 0.736204 | 0.813739 | 515 | 515 |
| LOC284688 | 0.014887 | 0.736086 | 0.813676 | 515 | 159 |
| CCDC125   | 0.014926 | 0.735418 | 0.813162 | 515 | 515 |
| RPS4X     | 0.014943 | 0.735126 | 0.812974 | 515 | 515 |
| GCHFR     | 0.014956 | 0.734909 | 0.812825 | 515 | 515 |
| C8A       | 0.014991 | 0.734309 | 0.812296 | 515 | 334 |
| SFTA3     | 0.015015 | 0.73391  | 0.8119   | 515 | 512 |
| DUOX1     | 0.015022 | 0.73379  | 0.811811 | 515 | 515 |
| TBC1D8B   | 0.015035 | 0.733562 | 0.811648 | 515 | 515 |
| GGA3      | 0.015042 | 0.733446 | 0.811565 | 515 | 515 |
| MBNL2     | 0.01507  | 0.732975 | 0.811223 | 515 | 515 |
| C14orf34  | 0.015072 | 0.732931 | 0.811221 | 515 | 387 |
| POLE2     | 0.01508  | 0.732795 | 0.811115 | 515 | 515 |
| LZTFL1    | 0.015089 | 0.73264  | 0.810988 | 515 | 515 |
| COMMD7    | 0.01515  | 0.731598 | 0.810104 | 515 | 515 |
| ADAMTSL5  | 0.015206 | 0.73065  | 0.809234 | 515 | 515 |
| CPB2      | 0.015214 | 0.730515 | 0.809129 | 515 | 473 |
| CLYBL     | 0.015217 | 0.730467 | 0.809129 | 515 | 515 |
| CYB5A     | 0.015232 | 0.7302   | 0.808914 | 515 | 515 |
| NUFIP2    | 0.015267 | 0.729608 | 0.808393 | 515 | 515 |
| ATP13A5   | 0.015269 | 0.72957  | 0.808393 | 515 | 416 |
| TMEM132B  | 0.015278 | 0.729426 | 0.808297 | 515 | 496 |
| STMN2     | 0.015289 | 0.729232 | 0.808155 | 515 | 471 |
| GINS1     | 0.015292 | 0.729184 | 0.808146 | 515 | 515 |
| IFT27     | 0.015318 | 0.728736 | 0.807767 | 515 | 515 |
| RSRC1     | 0.01532  | 0.728714 | 0.807767 | 515 | 515 |
| GFM2      | 0.015325 | 0.728621 | 0.807746 | 515 | 515 |
| SLC35D3   | 0.015351 | 0.728179 | 0.807391 | 515 | 355 |
| SLC22A17  | 0.015362 | 0.727989 | 0.807226 | 515 | 515 |
| EIF3M     | 0.015379 | 0.727704 | 0.806954 | 515 | 515 |
| ZNF324B   | 0.015407 | 0.727237 | 0.806526 | 515 | 515 |
| ZNF528    | 0.015415 | 0.727097 | 0.806415 | 515 | 515 |

|           |          |          |          |     |     |
|-----------|----------|----------|----------|-----|-----|
| C10orf76  | 0.01542  | 0.727012 | 0.806366 | 515 | 515 |
| ZFHX4     | 0.015421 | 0.726999 | 0.806366 | 515 | 515 |
| MYLK4     | 0.015466 | 0.726234 | 0.805816 | 515 | 515 |
| OR52A4    | 0.015474 | 0.726084 | 0.805694 | 515 | 17  |
| NEK11     | 0.015523 | 0.725253 | 0.804905 | 515 | 515 |
| SPATA21   | 0.015552 | 0.724764 | 0.804452 | 515 | 159 |
| ODF3      | 0.015578 | 0.724327 | 0.804012 | 515 | 134 |
| CHRNB4    | 0.015583 | 0.724243 | 0.804012 | 515 | 479 |
| PCDHGB8P  | 0.015587 | 0.724177 | 0.804012 | 515 | 440 |
| PRPF38A   | 0.015597 | 0.723997 | 0.803914 | 515 | 515 |
| FZD1      | 0.015598 | 0.723994 | 0.803914 | 515 | 515 |
| ADAM18    | 0.015613 | 0.72373  | 0.803775 | 515 | 49  |
| SLC22A3   | 0.015614 | 0.723714 | 0.803775 | 515 | 515 |
| LACTB2    | 0.015646 | 0.723174 | 0.803357 | 515 | 515 |
| C15orf29  | 0.015652 | 0.723073 | 0.803305 | 515 | 515 |
| AEBP2     | 0.015683 | 0.722536 | 0.802946 | 515 | 515 |
| GPC1      | 0.015684 | 0.72253  | 0.802946 | 515 | 515 |
| INPP5K    | 0.015696 | 0.722319 | 0.802898 | 515 | 515 |
| SCFD1     | 0.015722 | 0.721887 | 0.802552 | 515 | 515 |
| LOC100133 | 0.015728 | 0.721777 | 0.802496 | 515 | 58  |
| FZD6      | 0.015759 | 0.721251 | 0.801978 | 515 | 515 |
| AADA2L2   | 0.015826 | 0.720113 | 0.801025 | 515 | 66  |
| SNRPD2    | 0.015831 | 0.720031 | 0.800978 | 515 | 515 |
| ZNF544    | 0.015848 | 0.719744 | 0.800704 | 515 | 515 |
| LOC150622 | 0.015863 | 0.719496 | 0.800567 | 515 | 365 |
| ZNF518B   | 0.015873 | 0.719328 | 0.800553 | 515 | 515 |
| NFATC2IP  | 0.015911 | 0.718682 | 0.799923 | 515 | 515 |
| FAM182A   | 0.015921 | 0.718513 | 0.799829 | 515 | 369 |
| TM4SF1    | 0.015939 | 0.718211 | 0.799622 | 515 | 515 |
| LOC646627 | 0.015942 | 0.718154 | 0.799603 | 515 | 97  |
| CPO       | 0.015945 | 0.718097 | 0.799583 | 515 | 323 |
| SLC17A3   | 0.015963 | 0.717805 | 0.799303 | 515 | 236 |
| CCDC113   | 0.015991 | 0.717327 | 0.798993 | 515 | 515 |
| DHRS4     | 0.015998 | 0.717208 | 0.798905 | 515 | 515 |
| C2orf49   | 0.016065 | 0.716076 | 0.797733 | 515 | 515 |
| CCT4      | 0.016068 | 0.716017 | 0.797712 | 515 | 515 |
| KCNE3     | 0.016079 | 0.715844 | 0.797564 | 515 | 515 |
| SPTAN1    | 0.016099 | 0.7155   | 0.797358 | 515 | 515 |
| NKX6-3    | 0.016099 | 0.715491 | 0.797358 | 515 | 109 |
| TMEM174   | 0.016102 | 0.715442 | 0.797358 | 515 | 20  |
| KCNH8     | 0.016156 | 0.714529 | 0.796498 | 515 | 488 |
| XAGE3     | 0.016158 | 0.714501 | 0.796498 | 515 | 135 |
| LOC90834  | 0.016158 | 0.714498 | 0.796498 | 515 | 515 |
| ENO2      | 0.016165 | 0.714386 | 0.796472 | 515 | 515 |
| TMEM213   | 0.016178 | 0.714163 | 0.796316 | 515 | 490 |
| SLC25A12  | 0.016228 | 0.713322 | 0.795729 | 515 | 515 |
| MAGED4B   | 0.016228 | 0.713318 | 0.795729 | 515 | 515 |
| PGM3      | 0.016238 | 0.713154 | 0.795631 | 515 | 515 |
| MC2R      | 0.016239 | 0.713137 | 0.795631 | 515 | 240 |
| GABRR3    | 0.016242 | 0.713075 | 0.795631 | 515 | 33  |
| CHMP4A    | 0.016257 | 0.712833 | 0.795539 | 515 | 515 |
| RPS27L    | 0.016259 | 0.712801 | 0.795539 | 515 | 515 |
| MMP24     | 0.016262 | 0.712742 | 0.795526 | 515 | 515 |
| SIK3      | 0.016268 | 0.712643 | 0.795461 | 515 | 515 |

|           |          |          |          |     |     |
|-----------|----------|----------|----------|-----|-----|
| CADM1     | 0.016271 | 0.7126   | 0.795457 | 515 | 515 |
| RASL11B   | 0.01628  | 0.712439 | 0.795322 | 515 | 515 |
| MYCBPAP   | 0.016282 | 0.712404 | 0.795322 | 515 | 513 |
| C3orf45   | 0.01631  | 0.711933 | 0.79489  | 515 | 365 |
| NOG       | 0.016345 | 0.711345 | 0.794322 | 515 | 505 |
| EHHADH    | 0.016346 | 0.711332 | 0.794322 | 515 | 515 |
| SNORA53   | 0.016399 | 0.710428 | 0.79352  | 515 | 374 |
| LOC285501 | 0.016408 | 0.710279 | 0.793398 | 515 | 120 |
| OR2A25    | 0.016424 | 0.710005 | 0.793224 | 515 | 220 |
| SPRYD5    | 0.016441 | 0.709733 | 0.793009 | 515 | 154 |
| RAB40AL   | 0.016443 | 0.709691 | 0.793007 | 515 | 511 |
| LOC100192 | 0.016459 | 0.709422 | 0.792794 | 515 | 195 |
| C3orf22   | 0.01648  | 0.709073 | 0.792566 | 515 | 41  |
| C3orf75   | 0.016488 | 0.708927 | 0.792507 | 515 | 515 |
| RBCK1     | 0.016489 | 0.708924 | 0.792507 | 515 | 515 |
| MYOZ2     | 0.016531 | 0.708202 | 0.791829 | 515 | 341 |
| USP2      | 0.016534 | 0.708164 | 0.791829 | 515 | 513 |
| C17orf71  | 0.016534 | 0.708162 | 0.791829 | 515 | 515 |
| SLC44A1   | 0.016538 | 0.708098 | 0.791829 | 515 | 515 |
| TNS4      | 0.016554 | 0.707825 | 0.791656 | 515 | 515 |
| PPTC7     | 0.016598 | 0.707084 | 0.790978 | 515 | 515 |
| KLK10     | 0.016598 | 0.707083 | 0.790978 | 515 | 513 |
| CLPP      | 0.016607 | 0.706933 | 0.790897 | 515 | 515 |
| SUSD5     | 0.01664  | 0.706378 | 0.79041  | 515 | 515 |
| OR51E2    | 0.01666  | 0.706039 | 0.790074 | 515 | 302 |
| MYADML    | 0.016673 | 0.705818 | 0.789871 | 515 | 17  |
| CELA3A    | 0.016708 | 0.705233 | 0.789437 | 515 | 44  |
| OR10G2    | 0.016724 | 0.704956 | 0.789216 | 515 | 155 |
| THOC1     | 0.016742 | 0.704666 | 0.788936 | 515 | 515 |
| C13orf27  | 0.016753 | 0.704473 | 0.788808 | 515 | 515 |
| TPI1P2    | 0.016754 | 0.704464 | 0.788808 | 515 | 515 |
| BBS7      | 0.016756 | 0.704415 | 0.788808 | 515 | 515 |
| GRXCR2    | 0.016791 | 0.703828 | 0.788395 | 515 | 36  |
| KBTD13    | 0.016816 | 0.703419 | 0.788113 | 515 | 82  |
| ZNF532    | 0.016817 | 0.703391 | 0.788113 | 515 | 515 |
| ANKRD40   | 0.01682  | 0.703349 | 0.788113 | 515 | 515 |
| LPPR3     | 0.016829 | 0.703202 | 0.788003 | 515 | 484 |
| NUMB      | 0.016837 | 0.703063 | 0.787912 | 515 | 515 |
| C11orf67  | 0.016847 | 0.702892 | 0.787788 | 515 | 515 |
| PPP2R4    | 0.016872 | 0.702469 | 0.787446 | 515 | 515 |
| NAV1      | 0.016956 | 0.701069 | 0.786318 | 515 | 515 |
| TTC9      | 0.016963 | 0.700946 | 0.786223 | 515 | 515 |
| CITED1    | 0.016964 | 0.700929 | 0.786223 | 515 | 500 |
| TBPL2     | 0.016971 | 0.700819 | 0.786169 | 515 | 48  |
| ARHGEF37  | 0.01698  | 0.700661 | 0.786037 | 515 | 515 |
| NR3C2     | 0.016982 | 0.700632 | 0.786037 | 515 | 515 |
| ARF3      | 0.017007 | 0.700203 | 0.78561  | 515 | 515 |
| ZMIZ1     | 0.017038 | 0.699689 | 0.785166 | 515 | 515 |
| ZNF830    | 0.017045 | 0.69957  | 0.785089 | 515 | 515 |
| RNF112    | 0.017059 | 0.699337 | 0.784991 | 515 | 511 |
| DBX1      | 0.017091 | 0.698795 | 0.784639 | 515 | 50  |
| ZC3H6     | 0.017132 | 0.698119 | 0.784146 | 515 | 515 |
| SNORA72   | 0.017134 | 0.698086 | 0.784146 | 515 | 153 |
| PDCD5     | 0.017144 | 0.697913 | 0.784054 | 515 | 515 |

|           |          |          |          |     |     |
|-----------|----------|----------|----------|-----|-----|
| ACSF3     | 0.017146 | 0.697875 | 0.784054 | 515 | 515 |
| LPHN3     | 0.017147 | 0.697853 | 0.784054 | 515 | 509 |
| KIAA1704  | 0.017159 | 0.697654 | 0.783895 | 515 | 515 |
| RNASEH2A  | 0.017164 | 0.697576 | 0.783851 | 515 | 515 |
| KRT77     | 0.017168 | 0.697514 | 0.783826 | 515 | 54  |
| FSTL3     | 0.01717  | 0.697471 | 0.783826 | 515 | 515 |
| ORC1L     | 0.017184 | 0.697245 | 0.783744 | 515 | 515 |
| OLAH      | 0.017222 | 0.696609 | 0.783294 | 515 | 375 |
| WNT9A     | 0.017238 | 0.696344 | 0.783172 | 515 | 514 |
| ST8SIA2   | 0.017238 | 0.696341 | 0.783172 | 515 | 451 |
| HEXDC     | 0.017254 | 0.696069 | 0.783039 | 515 | 515 |
| DERA      | 0.017287 | 0.69551  | 0.782497 | 515 | 515 |
| HORMAD2   | 0.017304 | 0.695237 | 0.782278 | 515 | 326 |
| SYNCRIP   | 0.017324 | 0.694896 | 0.782027 | 515 | 515 |
| SOX9      | 0.01733  | 0.6948   | 0.781963 | 515 | 515 |
| FNDC8     | 0.017351 | 0.694445 | 0.781607 | 515 | 513 |
| ABCA5     | 0.017355 | 0.69438  | 0.781582 | 515 | 515 |
| SNORA28   | 0.017403 | 0.693584 | 0.78077  | 515 | 4   |
| PRX       | 0.01742  | 0.693297 | 0.780535 | 515 | 515 |
| ASL       | 0.017431 | 0.693105 | 0.780363 | 515 | 515 |
| NME6      | 0.017442 | 0.692926 | 0.780249 | 515 | 515 |
| TMEM126A  | 0.017449 | 0.692811 | 0.780208 | 515 | 515 |
| FDX1      | 0.017455 | 0.692701 | 0.780128 | 515 | 515 |
| MAP6D1    | 0.017472 | 0.692425 | 0.77986  | 515 | 515 |
| LHCGR     | 0.017478 | 0.692314 | 0.77978  | 515 | 306 |
| NRXN1     | 0.017501 | 0.691942 | 0.779405 | 515 | 413 |
| SCARNA11  | 0.017508 | 0.691821 | 0.7794   | 515 | 4   |
| ATL1      | 0.017516 | 0.691692 | 0.779299 | 515 | 515 |
| DUS3L     | 0.017536 | 0.691357 | 0.779097 | 515 | 515 |
| SEPT10    | 0.017581 | 0.690595 | 0.778385 | 515 | 515 |
| PHAX      | 0.01762  | 0.689956 | 0.777825 | 515 | 515 |
| CABP5     | 0.017627 | 0.689836 | 0.777734 | 515 | 23  |
| SNX19     | 0.017638 | 0.689655 | 0.777618 | 515 | 515 |
| MMADHC    | 0.017653 | 0.689405 | 0.777423 | 515 | 515 |
| SLC9A3R1  | 0.017662 | 0.689247 | 0.777307 | 515 | 515 |
| TLX1      | 0.017682 | 0.688917 | 0.777005 | 515 | 252 |
| FANCA     | 0.017699 | 0.688639 | 0.776735 | 515 | 515 |
| HCG22     | 0.017709 | 0.688462 | 0.776579 | 515 | 351 |
| ARAP3     | 0.017751 | 0.68776  | 0.775831 | 515 | 515 |
| CDCA8     | 0.017759 | 0.687636 | 0.775735 | 515 | 515 |
| BIRC5     | 0.017776 | 0.687347 | 0.775452 | 515 | 515 |
| IMPG1     | 0.017789 | 0.687127 | 0.775292 | 515 | 494 |
| ABCC3     | 0.017832 | 0.686422 | 0.774628 | 515 | 515 |
| HHLA3     | 0.017834 | 0.686381 | 0.774625 | 515 | 515 |
| PGM1      | 0.017834 | 0.686377 | 0.774625 | 515 | 515 |
| LOC286238 | 0.017886 | 0.685525 | 0.77379  | 515 | 7   |
| CNTF      | 0.017908 | 0.685148 | 0.77354  | 515 | 511 |
| MC3R      | 0.017955 | 0.684365 | 0.772786 | 515 | 33  |
| COL24A1   | 0.017969 | 0.684146 | 0.772669 | 515 | 515 |
| SLC7A14   | 0.017969 | 0.684141 | 0.772669 | 515 | 199 |
| RBM6      | 0.017995 | 0.683705 | 0.77239  | 515 | 515 |
| TEKT2     | 0.018007 | 0.683513 | 0.772269 | 515 | 500 |
| CHMP6     | 0.018023 | 0.683244 | 0.772213 | 515 | 515 |
| FAM161B   | 0.018028 | 0.683165 | 0.772172 | 515 | 515 |



|           |          |          |          |     |     |
|-----------|----------|----------|----------|-----|-----|
| C8ORFK29  | 0.018052 | 0.682758 | 0.7718   | 515 | 496 |
| CBWD1     | 0.018068 | 0.682498 | 0.771561 | 515 | 515 |
| CDCA5     | 0.018082 | 0.682261 | 0.771369 | 515 | 515 |
| TERC      | 0.018083 | 0.682243 | 0.771369 | 515 | 320 |
| FAM27A    | 0.018105 | 0.681877 | 0.771022 | 515 | 513 |
| RNASEK    | 0.018117 | 0.681676 | 0.770838 | 515 | 515 |
| WBP11     | 0.01815  | 0.681123 | 0.770343 | 515 | 515 |
| MIIP      | 0.018176 | 0.680694 | 0.770033 | 515 | 515 |
| NRADDP    | 0.018211 | 0.680125 | 0.769476 | 515 | 457 |
| FBX045    | 0.018247 | 0.679518 | 0.769008 | 515 | 515 |
| SMAD5OS   | 0.018252 | 0.679435 | 0.769001 | 515 | 500 |
| TBX22     | 0.018271 | 0.679124 | 0.768779 | 515 | 86  |
| FBX047    | 0.018289 | 0.678818 | 0.768606 | 515 | 240 |
| ACOT4     | 0.018375 | 0.677395 | 0.767169 | 515 | 515 |
| CATSPERG  | 0.018381 | 0.677291 | 0.767095 | 515 | 514 |
| CTR9      | 0.018401 | 0.676971 | 0.76695  | 515 | 515 |
| SASH1     | 0.01841  | 0.676813 | 0.766858 | 515 | 515 |
| SLC2A13   | 0.018425 | 0.676571 | 0.766627 | 515 | 515 |
| ZNF782    | 0.01844  | 0.676323 | 0.766455 | 515 | 515 |
| NEU4      | 0.018454 | 0.676097 | 0.766307 | 515 | 448 |
| DSCAM     | 0.018465 | 0.675912 | 0.766141 | 515 | 380 |
| TOMM20L   | 0.01847  | 0.67582  | 0.76608  | 515 | 411 |
| PRAMEF18  | 0.018473 | 0.675777 | 0.76608  | 515 | 45  |
| PCDHGA2   | 0.018474 | 0.675755 | 0.76608  | 515 | 512 |
| YWHAQ     | 0.018483 | 0.675613 | 0.766063 | 515 | 515 |
| NDE1      | 0.018494 | 0.675426 | 0.765937 | 515 | 515 |
| DLL1      | 0.018494 | 0.675422 | 0.765937 | 515 | 515 |
| SLC18A3   | 0.0185   | 0.675331 | 0.765917 | 515 | 197 |
| DCUN1D5   | 0.018507 | 0.675214 | 0.765828 | 515 | 515 |
| DYNLT1    | 0.018535 | 0.674748 | 0.76543  | 515 | 515 |
| NRAP      | 0.018547 | 0.674553 | 0.765264 | 515 | 351 |
| LOC400794 | 0.018559 | 0.674347 | 0.765192 | 515 | 407 |
| FAM194A   | 0.018566 | 0.674239 | 0.765112 | 515 | 356 |
| ORM1      | 0.018566 | 0.674235 | 0.765112 | 515 | 510 |
| TSHB      | 0.018575 | 0.674081 | 0.765063 | 515 | 40  |
| KRTAP1-5  | 0.018576 | 0.674063 | 0.765063 | 515 | 161 |
| PHF20     | 0.018599 | 0.673693 | 0.76471  | 515 | 515 |
| C9orf128  | 0.018622 | 0.673306 | 0.764357 | 515 | 449 |
| MRGPRX4   | 0.018663 | 0.672633 | 0.76392  | 515 | 65  |
| SFRS12    | 0.018681 | 0.672328 | 0.763711 | 515 | 515 |
| CDC37     | 0.018682 | 0.672322 | 0.763711 | 515 | 515 |
| LOC100128 | 0.018699 | 0.672036 | 0.763479 | 515 | 515 |
| CAND1     | 0.0187   | 0.672025 | 0.763479 | 515 | 515 |
| ANKRD37   | 0.018773 | 0.670811 | 0.762347 | 515 | 515 |
| SBN02     | 0.018796 | 0.670435 | 0.761963 | 515 | 515 |
| KLK5      | 0.018798 | 0.670401 | 0.761963 | 515 | 325 |
| FOXE1     | 0.018805 | 0.670291 | 0.761887 | 515 | 440 |
| RPL3L     | 0.01882  | 0.670039 | 0.761643 | 515 | 66  |
| USP6      | 0.018826 | 0.669947 | 0.761583 | 515 | 515 |
| WIPF3     | 0.018838 | 0.66974  | 0.761434 | 515 | 508 |
| NKD1      | 0.018843 | 0.669661 | 0.761387 | 515 | 515 |
| LY6G5B    | 0.018875 | 0.669139 | 0.760924 | 515 | 515 |
| PDCD6IP   | 0.018877 | 0.669093 | 0.760924 | 515 | 515 |
| PPIH      | 0.01889  | 0.668879 | 0.760757 | 515 | 515 |

|           |          |          |          |     |     |
|-----------|----------|----------|----------|-----|-----|
| ASPM      | 0.018927 | 0.66827  | 0.760152 | 515 | 515 |
| APPBP2    | 0.01898  | 0.667407 | 0.7593   | 515 | 515 |
| SLAMF9    | 0.018995 | 0.667162 | 0.759107 | 515 | 507 |
| C9orf131  | 0.019027 | 0.666633 | 0.758678 | 515 | 446 |
| MCPH1     | 0.019035 | 0.66649  | 0.758602 | 515 | 515 |
| LOC728875 | 0.019041 | 0.6664   | 0.758543 | 515 | 515 |
| COL4A2    | 0.019041 | 0.6664   | 0.758543 | 515 | 515 |
| TDRD3     | 0.019043 | 0.666358 | 0.758543 | 515 | 515 |
| AIFM3     | 0.019058 | 0.666121 | 0.75837  | 515 | 514 |
| COL28A1   | 0.019062 | 0.666051 | 0.758361 | 515 | 511 |
| C3orf48   | 0.019065 | 0.666006 | 0.758353 | 515 | 289 |
| ERLIN1    | 0.019078 | 0.665792 | 0.758157 | 515 | 515 |
| PLA2G1B   | 0.019102 | 0.66539  | 0.757824 | 515 | 491 |
| DAND5     | 0.019105 | 0.66535  | 0.757824 | 515 | 437 |
| ABCG4     | 0.019116 | 0.665164 | 0.75773  | 515 | 494 |
| PMS2L1    | 0.019123 | 0.665055 | 0.757659 | 515 | 515 |
| C14orf166 | 0.019123 | 0.665041 | 0.757659 | 515 | 515 |
| ABCA11P   | 0.019142 | 0.664733 | 0.757508 | 515 | 515 |
| OR2H1     | 0.019142 | 0.66473  | 0.757508 | 515 | 49  |
| RPS11     | 0.019166 | 0.664339 | 0.757232 | 515 | 515 |
| C19orf56  | 0.019169 | 0.664296 | 0.757232 | 515 | 515 |
| THAP10    | 0.01922  | 0.663452 | 0.756483 | 515 | 515 |
| ZNF621    | 0.019254 | 0.662891 | 0.755969 | 515 | 515 |
| TMEM185B  | 0.019284 | 0.662409 | 0.755548 | 515 | 515 |
| SLC26A2   | 0.019289 | 0.662313 | 0.755482 | 515 | 515 |
| RBKS      | 0.019296 | 0.662209 | 0.755406 | 515 | 515 |
| TGDS      | 0.019312 | 0.661949 | 0.755153 | 515 | 515 |
| KIF18B    | 0.019325 | 0.661735 | 0.754995 | 515 | 515 |
| KIAA1875  | 0.019328 | 0.661679 | 0.754975 | 515 | 509 |
| PSMG2     | 0.01934  | 0.661486 | 0.754798 | 515 | 515 |
| GOLGA7    | 0.01936  | 0.661158 | 0.754509 | 515 | 515 |
| SCARNA20  | 0.019363 | 0.66111  | 0.754498 | 515 | 6   |
| ZFAND1    | 0.019364 | 0.661083 | 0.754498 | 515 | 515 |
| CCR10     | 0.019392 | 0.660626 | 0.7542   | 515 | 514 |
| CDKL5     | 0.019398 | 0.660533 | 0.754183 | 515 | 513 |
| CEACAM5   | 0.019399 | 0.660518 | 0.754183 | 515 | 515 |
| C1orf114  | 0.019401 | 0.660477 | 0.754183 | 515 | 509 |
| PRKAG2    | 0.019435 | 0.659917 | 0.753609 | 515 | 515 |
| RAD54L2   | 0.019438 | 0.659877 | 0.753607 | 515 | 515 |
| RAD54B    | 0.019442 | 0.659809 | 0.753577 | 515 | 515 |
| INPP5J    | 0.019448 | 0.659712 | 0.753577 | 515 | 515 |
| HAND2     | 0.019458 | 0.659544 | 0.753485 | 515 | 250 |
| ZNF577    | 0.019484 | 0.659113 | 0.753079 | 515 | 515 |
| ADAMTS5   | 0.0195   | 0.658856 | 0.75288  | 515 | 515 |
| CDRT1     | 0.0195   | 0.658855 | 0.75288  | 515 | 472 |
| C1orf156  | 0.019528 | 0.658391 | 0.752512 | 515 | 515 |
| ALAS1     | 0.01954  | 0.658194 | 0.752337 | 515 | 515 |
| C16orf70  | 0.019546 | 0.658111 | 0.752337 | 515 | 515 |
| KRTAP5-11 | 0.019553 | 0.657986 | 0.752306 | 515 | 29  |
| XPO1      | 0.019561 | 0.657861 | 0.752207 | 515 | 515 |
| NFYB      | 0.019571 | 0.657693 | 0.752058 | 515 | 515 |
| HYAL2     | 0.019574 | 0.657638 | 0.752049 | 515 | 515 |
| SPEF1     | 0.019578 | 0.657578 | 0.752049 | 515 | 506 |
| PRTG      | 0.019583 | 0.657501 | 0.752049 | 515 | 515 |

|           |          |          |          |     |     |
|-----------|----------|----------|----------|-----|-----|
| NDUFA11   | 0.019596 | 0.657276 | 0.751839 | 515 | 515 |
| SNORA1    | 0.019606 | 0.657114 | 0.751697 | 515 | 14  |
| ABTB2     | 0.019627 | 0.656776 | 0.751396 | 515 | 515 |
| CEP68     | 0.019644 | 0.656493 | 0.751201 | 515 | 515 |
| ACER2     | 0.019654 | 0.65633  | 0.7511   | 515 | 515 |
| POLR2J2   | 0.01966  | 0.65624  | 0.75107  | 515 | 513 |
| ADRA1B    | 0.019669 | 0.656091 | 0.751    | 515 | 513 |
| OR4K17    | 0.019691 | 0.655737 | 0.750637 | 515 | 6   |
| LCE1B     | 0.019703 | 0.65553  | 0.750443 | 515 | 32  |
| PLA2G16   | 0.019712 | 0.655389 | 0.75041  | 515 | 515 |
| IFT52     | 0.01974  | 0.654927 | 0.749924 | 515 | 515 |
| LCORL     | 0.019749 | 0.654784 | 0.749825 | 515 | 515 |
| C9orf82   | 0.019749 | 0.654779 | 0.749825 | 515 | 515 |
| LCE2A     | 0.019761 | 0.654592 | 0.749756 | 515 | 16  |
| LOC389791 | 0.019767 | 0.65448  | 0.74967  | 515 | 483 |
| CT45A6    | 0.019774 | 0.654375 | 0.749593 | 515 | 30  |
| API5      | 0.019782 | 0.654242 | 0.749483 | 515 | 515 |
| FAM71F1   | 0.019783 | 0.654221 | 0.749483 | 515 | 245 |
| OR6T1     | 0.01984  | 0.653297 | 0.748787 | 515 | 16  |
| BAI2      | 0.019895 | 0.652389 | 0.747876 | 515 | 515 |
| TSPYL6    | 0.019895 | 0.652389 | 0.747876 | 515 | 221 |
| RS1       | 0.019904 | 0.652252 | 0.747846 | 515 | 479 |
| C2orf72   | 0.019938 | 0.651689 | 0.74745  | 515 | 513 |
| S100A16   | 0.019939 | 0.65167  | 0.74745  | 515 | 515 |
| OR52N5    | 0.019967 | 0.651226 | 0.747056 | 515 | 32  |
| NR2E1     | 0.020002 | 0.650642 | 0.746472 | 515 | 371 |
| APBB3     | 0.020029 | 0.65021  | 0.74611  | 515 | 515 |
| DCT       | 0.020055 | 0.649781 | 0.745698 | 515 | 283 |
| PSMF1     | 0.020081 | 0.649362 | 0.745277 | 515 | 515 |
| C13orf34  | 0.02009  | 0.649218 | 0.74518  | 515 | 515 |
| POU2F3    | 0.020095 | 0.649134 | 0.745127 | 515 | 514 |
| SEPSECS   | 0.020107 | 0.64894  | 0.744996 | 515 | 515 |
| ADRA1D    | 0.020142 | 0.648373 | 0.74451  | 515 | 501 |
| HIST1H2BJ | 0.02017  | 0.647912 | 0.74428  | 515 | 515 |
| GRM1      | 0.020175 | 0.647835 | 0.74428  | 515 | 469 |
| ABCA2     | 0.020175 | 0.647834 | 0.74428  | 515 | 515 |
| PVRL1     | 0.020177 | 0.647795 | 0.74428  | 515 | 515 |
| NANOG     | 0.020194 | 0.647515 | 0.74408  | 515 | 377 |
| C10orf129 | 0.020195 | 0.64751  | 0.74408  | 515 | 79  |
| KIAA2018  | 0.020217 | 0.647149 | 0.74392  | 515 | 515 |
| C4orf38   | 0.020238 | 0.646807 | 0.74378  | 515 | 514 |
| CAPN2     | 0.020258 | 0.646482 | 0.743492 | 515 | 515 |
| RPL36     | 0.02026  | 0.646445 | 0.743491 | 515 | 515 |
| ERP27     | 0.020265 | 0.646373 | 0.743451 | 515 | 515 |
| EPB41L4A  | 0.020293 | 0.64591  | 0.743132 | 515 | 515 |
| GPC4      | 0.020294 | 0.645888 | 0.743132 | 515 | 515 |
| ANXA8L1   | 0.020328 | 0.645348 | 0.7427   | 515 | 39  |
| NEURL2    | 0.020337 | 0.645203 | 0.742619 | 515 | 515 |
| FAM120A   | 0.020347 | 0.645034 | 0.74251  | 515 | 515 |
| EPC1      | 0.020387 | 0.644387 | 0.74198  | 515 | 515 |
| TXNDC17   | 0.020391 | 0.644314 | 0.74198  | 515 | 515 |
| C15orf5   | 0.020402 | 0.644148 | 0.741831 | 515 | 247 |
| SOX21     | 0.020409 | 0.644024 | 0.741732 | 515 | 500 |
| MMP27     | 0.020414 | 0.643939 | 0.741676 | 515 | 40  |

|           |          |          |          |     |     |
|-----------|----------|----------|----------|-----|-----|
| CLDN25    | 0.020436 | 0.643594 | 0.741364 | 515 | 48  |
| RPF2      | 0.020453 | 0.643309 | 0.741122 | 515 | 515 |
| FETUB     | 0.020455 | 0.643279 | 0.741122 | 515 | 245 |
| DFNB31    | 0.020464 | 0.643139 | 0.741026 | 515 | 515 |
| SULT2B1   | 0.020467 | 0.643087 | 0.741026 | 515 | 515 |
| ZMYM1     | 0.020511 | 0.642365 | 0.740376 | 515 | 515 |
| CCDC103   | 0.020513 | 0.642346 | 0.740376 | 515 | 515 |
| ZSCAN4    | 0.020514 | 0.642327 | 0.740376 | 515 | 404 |
| ZNF649    | 0.020542 | 0.64187  | 0.739976 | 515 | 515 |
| ERBB4     | 0.020549 | 0.64176  | 0.739935 | 515 | 506 |
| POLR3F    | 0.020563 | 0.641532 | 0.739714 | 515 | 515 |
| ICAM5     | 0.020572 | 0.641377 | 0.739577 | 515 | 514 |
| CCDC114   | 0.020619 | 0.640621 | 0.738962 | 515 | 514 |
| STAM      | 0.02063  | 0.640438 | 0.738794 | 515 | 515 |
| IPPK      | 0.020666 | 0.639858 | 0.73821  | 515 | 515 |
| KIAA1191  | 0.020676 | 0.639697 | 0.738067 | 515 | 515 |
| SNX1      | 0.020691 | 0.639449 | 0.737823 | 515 | 515 |
| ERCC1     | 0.020712 | 0.639116 | 0.737524 | 515 | 515 |
| CSRP1     | 0.020745 | 0.638572 | 0.736981 | 515 | 515 |
| MMP20     | 0.020818 | 0.637394 | 0.735749 | 515 | 81  |
| LOC100129 | 0.020833 | 0.637153 | 0.735555 | 515 | 515 |
| ZNF512    | 0.020834 | 0.637146 | 0.735555 | 515 | 515 |
| AHRR      | 0.02085  | 0.636889 | 0.735336 | 515 | 514 |
| PWP1      | 0.020864 | 0.636659 | 0.735156 | 515 | 515 |
| RBMX      | 0.020865 | 0.636633 | 0.735156 | 515 | 515 |
| OXSR1     | 0.020869 | 0.636577 | 0.735146 | 515 | 515 |
| RPL41     | 0.02087  | 0.636558 | 0.735146 | 515 | 515 |
| SERPINA6  | 0.020879 | 0.636418 | 0.73509  | 515 | 282 |
| RUNDC3A   | 0.020884 | 0.636339 | 0.73504  | 515 | 511 |
| EME1      | 0.020889 | 0.636255 | 0.734987 | 515 | 515 |
| ARFIP1    | 0.020984 | 0.634718 | 0.733338 | 515 | 515 |
| NDUFB6    | 0.020991 | 0.634607 | 0.733313 | 515 | 515 |
| RBMS2     | 0.02101  | 0.6343   | 0.733067 | 515 | 515 |
| RNF185    | 0.021013 | 0.634245 | 0.733045 | 515 | 515 |
| PRAMEF10  | 0.021014 | 0.634237 | 0.733045 | 515 | 9   |
| ZBTB40    | 0.021025 | 0.634062 | 0.732946 | 515 | 515 |
| LOC100272 | 0.021055 | 0.633572 | 0.732437 | 515 | 514 |
| SFXN5     | 0.021066 | 0.633395 | 0.732275 | 515 | 515 |
| ZNF322B   | 0.021096 | 0.632918 | 0.731808 | 515 | 515 |
| NOX3      | 0.021127 | 0.632418 | 0.731356 | 515 | 24  |
| KCP       | 0.021135 | 0.632285 | 0.731288 | 515 | 514 |
| SEZ6L2    | 0.021141 | 0.632184 | 0.731213 | 515 | 515 |
| CYP2C18   | 0.021143 | 0.632161 | 0.731213 | 515 | 496 |
| DUOXA1    | 0.021163 | 0.631836 | 0.730982 | 515 | 512 |
| UFD1L     | 0.02119  | 0.631388 | 0.730546 | 515 | 515 |
| KALRN     | 0.021191 | 0.631379 | 0.730546 | 515 | 515 |
| FAM45B    | 0.021192 | 0.631369 | 0.730546 | 515 | 515 |
| TMTC2     | 0.021204 | 0.631171 | 0.730464 | 515 | 515 |
| NAB2      | 0.021221 | 0.630903 | 0.730239 | 515 | 515 |
| NFE2L1    | 0.021254 | 0.630361 | 0.72978  | 515 | 515 |
| KANK2     | 0.021267 | 0.630162 | 0.729635 | 515 | 515 |
| ATP50     | 0.021295 | 0.629708 | 0.729194 | 515 | 515 |
| ATP8A1    | 0.021313 | 0.629414 | 0.728979 | 515 | 515 |
| ZBTB16    | 0.021316 | 0.629365 | 0.728965 | 515 | 509 |

|           |          |          |          |     |     |
|-----------|----------|----------|----------|-----|-----|
| SLC6A6    | 0.021318 | 0.629329 | 0.728965 | 515 | 515 |
| NAPA      | 0.021327 | 0.629185 | 0.728841 | 515 | 515 |
| GGNBP1    | 0.021353 | 0.628775 | 0.728535 | 515 | 94  |
| GLP1R     | 0.021356 | 0.628718 | 0.728511 | 515 | 416 |
| CREB3     | 0.02136  | 0.62866  | 0.728486 | 515 | 515 |
| DYRK3     | 0.021368 | 0.628536 | 0.728385 | 515 | 515 |
| SLC39A14  | 0.021382 | 0.628314 | 0.728212 | 515 | 515 |
| LRRC37A   | 0.021387 | 0.628219 | 0.728165 | 515 | 515 |
| IAH1      | 0.021395 | 0.628099 | 0.728131 | 515 | 515 |
| C14orf37  | 0.021428 | 0.627573 | 0.72769  | 515 | 515 |
| JHDM1D    | 0.021464 | 0.62699  | 0.727183 | 515 | 515 |
| TADA2A    | 0.021476 | 0.626789 | 0.727035 | 515 | 515 |
| C6orf203  | 0.021492 | 0.626542 | 0.726833 | 515 | 515 |
| IMPACT    | 0.021511 | 0.626243 | 0.726527 | 515 | 515 |
| CNOT4     | 0.021512 | 0.626223 | 0.726527 | 515 | 515 |
| RPL23AP53 | 0.021537 | 0.625817 | 0.726244 | 515 | 515 |
| C16orf79  | 0.021539 | 0.625786 | 0.726244 | 515 | 512 |
| C1orf144  | 0.021548 | 0.625641 | 0.726166 | 515 | 515 |
| CRIP3     | 0.02156  | 0.625444 | 0.726064 | 515 | 442 |
| FBXO18    | 0.02158  | 0.625125 | 0.725779 | 515 | 515 |
| HHLA1     | 0.021584 | 0.625062 | 0.725747 | 515 | 105 |
| C14orf72  | 0.021605 | 0.624721 | 0.725465 | 515 | 514 |
| DUSP22    | 0.021618 | 0.624522 | 0.725289 | 515 | 515 |
| THOC4     | 0.021625 | 0.624408 | 0.725241 | 515 | 515 |
| BAG2      | 0.021638 | 0.6242   | 0.725041 | 515 | 515 |
| NUDT6     | 0.021663 | 0.623795 | 0.724655 | 515 | 515 |
| MARS      | 0.021664 | 0.623783 | 0.724655 | 515 | 515 |
| NDUFAF2   | 0.021669 | 0.623705 | 0.724655 | 515 | 515 |
| TTC9B     | 0.021676 | 0.623591 | 0.724586 | 515 | 288 |
| FLJ35220  | 0.02169  | 0.623369 | 0.724427 | 515 | 515 |
| LYZL4     | 0.021718 | 0.62291  | 0.724005 | 515 | 144 |
| ATP6V1D   | 0.021719 | 0.622906 | 0.724005 | 515 | 515 |
| ADNP2     | 0.021724 | 0.622826 | 0.723993 | 515 | 515 |
| KRTAP5-6  | 0.021743 | 0.622512 | 0.723737 | 515 | 87  |
| MLXIP     | 0.021782 | 0.621892 | 0.723201 | 515 | 515 |
| HES3      | 0.021806 | 0.621511 | 0.7228   | 515 | 9   |
| ALDH1L1   | 0.021823 | 0.62123  | 0.722557 | 515 | 504 |
| DSC1      | 0.021839 | 0.620987 | 0.722359 | 515 | 271 |
| NUBPL     | 0.021846 | 0.620866 | 0.72226  | 515 | 515 |
| BIN3      | 0.021888 | 0.620193 | 0.721561 | 515 | 515 |
| TTY8      | 0.021989 | 0.618582 | 0.720022 | 515 | 6   |
| UBXN4     | 0.021991 | 0.618554 | 0.720022 | 515 | 515 |
| KARS      | 0.022017 | 0.618139 | 0.719673 | 515 | 515 |
| SPC24     | 0.022043 | 0.617716 | 0.719224 | 515 | 512 |
| SNORA66   | 0.022069 | 0.617307 | 0.718789 | 515 | 4   |
| TAS2R9    | 0.022094 | 0.616916 | 0.718459 | 515 | 30  |
| RPL28     | 0.022103 | 0.616759 | 0.718318 | 515 | 515 |
| WDHD1     | 0.022111 | 0.616644 | 0.718261 | 515 | 515 |
| CCDC122   | 0.022113 | 0.616604 | 0.718261 | 515 | 515 |
| SBF1      | 0.022116 | 0.616563 | 0.718261 | 515 | 515 |
| MALAT1    | 0.022161 | 0.61584  | 0.71769  | 515 | 515 |
| MBL1P     | 0.022186 | 0.615445 | 0.717331 | 515 | 510 |
| EYA1      | 0.022202 | 0.615184 | 0.717111 | 515 | 500 |
| C17orf64  | 0.022257 | 0.614318 | 0.716394 | 515 | 408 |

|           |          |          |          |     |     |
|-----------|----------|----------|----------|-----|-----|
| STAG3L2   | 0.022293 | 0.61374  | 0.715803 | 515 | 515 |
| PABPN1L   | 0.022298 | 0.613663 | 0.715755 | 515 | 107 |
| SNORA81   | 0.022313 | 0.613425 | 0.715561 | 515 | 241 |
| HOXB9     | 0.022319 | 0.613332 | 0.715494 | 515 | 447 |
| KIF11     | 0.022338 | 0.613031 | 0.715227 | 515 | 515 |
| KLHDC8B   | 0.022376 | 0.612428 | 0.714723 | 515 | 515 |
| PTCHD2    | 0.022385 | 0.612283 | 0.714604 | 515 | 484 |
| NPM1      | 0.022442 | 0.611368 | 0.713703 | 515 | 515 |
| TEX10     | 0.022452 | 0.611213 | 0.713606 | 515 | 515 |
| C10orf111 | 0.022454 | 0.611174 | 0.713602 | 515 | 510 |
| NEK3      | 0.022482 | 0.610733 | 0.713212 | 515 | 515 |
| GARNL3    | 0.022507 | 0.610333 | 0.712953 | 515 | 515 |
| UPK3A     | 0.022513 | 0.610241 | 0.712887 | 515 | 493 |
| RNF207    | 0.022516 | 0.610201 | 0.712882 | 515 | 515 |
| CHTF8     | 0.022522 | 0.610104 | 0.712852 | 515 | 515 |
| EVI5      | 0.02253  | 0.609969 | 0.712736 | 515 | 515 |
| ZNF814    | 0.022562 | 0.609462 | 0.71231  | 515 | 515 |
| PHF21B    | 0.022573 | 0.609287 | 0.71223  | 515 | 382 |
| C10orf93  | 0.022575 | 0.609263 | 0.71223  | 515 | 442 |
| FM05      | 0.022594 | 0.608961 | 0.712016 | 515 | 515 |
| RPL34     | 0.0226   | 0.608859 | 0.711939 | 515 | 515 |
| IGFL1     | 0.022629 | 0.608409 | 0.711578 | 515 | 315 |
| TTC25     | 0.022685 | 0.607516 | 0.710653 | 515 | 515 |
| CLEC18A   | 0.022702 | 0.607256 | 0.710438 | 515 | 508 |
| PAFAH1B2  | 0.022717 | 0.607012 | 0.710194 | 515 | 515 |
| RFC4      | 0.022724 | 0.6069   | 0.710146 | 515 | 515 |
| KRT33B    | 0.022744 | 0.606591 | 0.709909 | 515 | 126 |
| CBWD5     | 0.022776 | 0.606071 | 0.709425 | 515 | 287 |
| OR2V2     | 0.022802 | 0.605669 | 0.709121 | 515 | 5   |
| LNP1      | 0.022821 | 0.60537  | 0.708813 | 515 | 515 |
| ZNF793    | 0.02283  | 0.605224 | 0.708683 | 515 | 515 |
| TK1       | 0.022844 | 0.605008 | 0.708471 | 515 | 515 |
| PTPRK     | 0.022846 | 0.604967 | 0.708465 | 515 | 515 |
| SCUBE2    | 0.022878 | 0.604468 | 0.708088 | 515 | 515 |
| CRAT      | 0.02288  | 0.604434 | 0.708088 | 515 | 515 |
| MTHFD1    | 0.022888 | 0.604314 | 0.707991 | 515 | 515 |
| CETN2     | 0.022898 | 0.604146 | 0.707836 | 515 | 515 |
| CISD1     | 0.022929 | 0.603657 | 0.707345 | 515 | 515 |
| LCE1E     | 0.022935 | 0.603563 | 0.707277 | 515 | 38  |
| ZNF599    | 0.022947 | 0.603375 | 0.707097 | 515 | 515 |
| S100A11   | 0.022967 | 0.603057 | 0.706932 | 515 | 515 |
| FOXJ2     | 0.022984 | 0.602794 | 0.706666 | 515 | 515 |
| WDR81     | 0.022992 | 0.602668 | 0.706559 | 515 | 515 |
| SPRR4     | 0.023012 | 0.602351 | 0.706229 | 515 | 28  |
| UTP23     | 0.023025 | 0.602145 | 0.706029 | 515 | 515 |
| C16orf90  | 0.023031 | 0.602052 | 0.705961 | 515 | 111 |
| SYNGAP1   | 0.023033 | 0.602025 | 0.705961 | 515 | 515 |
| ZNF135    | 0.023036 | 0.601977 | 0.705957 | 515 | 515 |
| ARSA      | 0.023085 | 0.601193 | 0.705161 | 515 | 515 |
| MCART1    | 0.023111 | 0.600795 | 0.704776 | 515 | 515 |
| SDHAP2    | 0.023113 | 0.600756 | 0.704776 | 515 | 515 |
| LOC728819 | 0.023116 | 0.600709 | 0.704776 | 515 | 500 |
| C19orf62  | 0.023133 | 0.600449 | 0.704536 | 515 | 515 |
| CYP46A1   | 0.023145 | 0.600251 | 0.704395 | 515 | 514 |

|           |          |          |          |     |     |
|-----------|----------|----------|----------|-----|-----|
| LOC220729 | 0.023175 | 0.599786 | 0.703983 | 515 | 515 |
| KRT74     | 0.023182 | 0.599671 | 0.703954 | 515 | 67  |
| CSDE1     | 0.02321  | 0.599229 | 0.7036   | 515 | 515 |
| ZNF233    | 0.023235 | 0.59883  | 0.703256 | 515 | 515 |
| VASH2     | 0.023266 | 0.598355 | 0.702946 | 515 | 515 |
| CYMP      | 0.023278 | 0.598154 | 0.702792 | 515 | 180 |
| MEGF9     | 0.023282 | 0.598103 | 0.702774 | 515 | 515 |
| INSC      | 0.023292 | 0.59794  | 0.702623 | 515 | 446 |
| SMAD1     | 0.023299 | 0.597831 | 0.702536 | 515 | 515 |
| CCNB2     | 0.02332  | 0.597492 | 0.702262 | 515 | 515 |
| PDC       | 0.023337 | 0.597233 | 0.702082 | 515 | 286 |
| C4orf49   | 0.023355 | 0.596951 | 0.701799 | 515 | 504 |
| MON2      | 0.023369 | 0.596727 | 0.701639 | 515 | 515 |
| BTG3      | 0.023371 | 0.596693 | 0.701639 | 515 | 515 |
| SLC38A7   | 0.023372 | 0.59668  | 0.701639 | 515 | 515 |
| UBQLN1    | 0.023386 | 0.596456 | 0.701521 | 515 | 515 |
| ELK4      | 0.023392 | 0.59637  | 0.70148  | 515 | 515 |
| ACSM3     | 0.023397 | 0.596288 | 0.701425 | 515 | 515 |
| XPR1      | 0.0234   | 0.596243 | 0.701413 | 515 | 515 |
| TAAR6     | 0.023402 | 0.596207 | 0.701412 | 515 | 21  |
| IL20      | 0.023411 | 0.596077 | 0.7013   | 515 | 191 |
| BNIP1     | 0.02343  | 0.595765 | 0.701016 | 515 | 515 |
| HIST1H2BG | 0.023471 | 0.595128 | 0.700348 | 515 | 485 |
| NUP107    | 0.023477 | 0.59503  | 0.700315 | 515 | 515 |
| IFT20     | 0.023481 | 0.594964 | 0.700279 | 515 | 515 |
| FYCO1     | 0.023504 | 0.594617 | 0.699912 | 515 | 515 |
| CXCL5     | 0.023523 | 0.594316 | 0.699667 | 515 | 514 |
| OR4X2     | 0.02354  | 0.594051 | 0.69941  | 515 | 5   |
| TM7SF3    | 0.023565 | 0.593646 | 0.699016 | 515 | 515 |
| KCNH6     | 0.023571 | 0.593565 | 0.699003 | 515 | 407 |
| C16orf92  | 0.023574 | 0.593505 | 0.698973 | 515 | 63  |
| TNIP2     | 0.023623 | 0.592738 | 0.698195 | 515 | 515 |
| CCDC84    | 0.023628 | 0.592674 | 0.698195 | 515 | 515 |
| C14orf50  | 0.023639 | 0.592501 | 0.698115 | 515 | 510 |
| OR11A1    | 0.023641 | 0.592465 | 0.698115 | 515 | 16  |
| C1QTNF8   | 0.023642 | 0.592448 | 0.698115 | 515 | 112 |
| CGB5      | 0.023649 | 0.592337 | 0.69809  | 515 | 307 |
| GOLT1A    | 0.023657 | 0.592218 | 0.697992 | 515 | 514 |
| SPAG17    | 0.023663 | 0.592111 | 0.697984 | 515 | 509 |
| PCDHB3    | 0.023682 | 0.591827 | 0.697737 | 515 | 515 |
| TBCA      | 0.023689 | 0.591714 | 0.697686 | 515 | 515 |
| ADCY9     | 0.023697 | 0.591586 | 0.697618 | 515 | 515 |
| TSIX      | 0.023731 | 0.591057 | 0.697035 | 515 | 382 |
| THAP1     | 0.023741 | 0.590899 | 0.696931 | 515 | 515 |
| LOC727924 | 0.023759 | 0.59061  | 0.696689 | 515 | 17  |
| WFDC11    | 0.023764 | 0.590533 | 0.696689 | 515 | 112 |
| FNDC3A    | 0.02377  | 0.590439 | 0.696635 | 515 | 515 |
| CARNS1    | 0.023797 | 0.590016 | 0.696177 | 515 | 515 |
| TNNI3K    | 0.023808 | 0.589844 | 0.696056 | 515 | 503 |
| BTBD18    | 0.023809 | 0.589829 | 0.696056 | 515 | 419 |
| CCDC76    | 0.02381  | 0.58982  | 0.696056 | 515 | 515 |
| TOMM5     | 0.023816 | 0.589731 | 0.696046 | 515 | 515 |
| WSB2      | 0.023827 | 0.589558 | 0.695883 | 515 | 515 |
| GRPEL2    | 0.023827 | 0.589551 | 0.695883 | 515 | 515 |

|           |          |          |          |     |     |
|-----------|----------|----------|----------|-----|-----|
| SCARNA15  | 0.023833 | 0.589458 | 0.695848 | 515 | 11  |
| C17orf86  | 0.023877 | 0.588779 | 0.69521  | 515 | 515 |
| RNU4ATAC  | 0.023909 | 0.58827  | 0.694691 | 515 | 20  |
| LOC645676 | 0.023912 | 0.588226 | 0.69468  | 515 | 515 |
| ITGA10    | 0.023921 | 0.588083 | 0.694594 | 515 | 515 |
| MTX3      | 0.023932 | 0.587916 | 0.694437 | 515 | 515 |
| DHDPSL    | 0.023954 | 0.587566 | 0.694106 | 515 | 496 |
| LEMD3     | 0.023971 | 0.587302 | 0.693835 | 515 | 515 |
| TUBA3D    | 0.024006 | 0.586764 | 0.693363 | 515 | 449 |
| NCRNA0016 | 0.024007 | 0.586742 | 0.693363 | 515 | 268 |
| MLL       | 0.024028 | 0.586417 | 0.693078 | 515 | 515 |
| CYP2E1    | 0.024043 | 0.58619  | 0.692931 | 515 | 514 |
| PAEP      | 0.024052 | 0.586037 | 0.692791 | 515 | 478 |
| ING4      | 0.024068 | 0.585788 | 0.692578 | 515 | 515 |
| SERPINH1  | 0.024098 | 0.58533  | 0.692119 | 515 | 515 |
| IFT80     | 0.024118 | 0.585009 | 0.691821 | 515 | 515 |
| CEP170L   | 0.024121 | 0.584967 | 0.691812 | 515 | 502 |
| LOC729176 | 0.024149 | 0.584539 | 0.691429 | 515 | 515 |
| WISP3     | 0.02416  | 0.584362 | 0.69126  | 515 | 391 |
| GPR22     | 0.024167 | 0.584256 | 0.691176 | 515 | 308 |
| CRYGA     | 0.024168 | 0.584232 | 0.691176 | 515 | 5   |
| MRGPRE    | 0.024199 | 0.583758 | 0.69075  | 515 | 294 |
| RASSF9    | 0.024215 | 0.583504 | 0.69049  | 515 | 514 |
| APBB1     | 0.024223 | 0.583381 | 0.690427 | 515 | 515 |
| SNORA38   | 0.02426  | 0.582807 | 0.689838 | 515 | 6   |
| RNF31     | 0.024291 | 0.582321 | 0.689393 | 515 | 515 |
| DPP10     | 0.024301 | 0.58217  | 0.68932  | 515 | 460 |
| EDDM3A    | 0.024309 | 0.58205  | 0.689219 | 515 | 200 |
| KRTAP4-2  | 0.024318 | 0.581904 | 0.689128 | 515 | 23  |
| HP1BP3    | 0.024332 | 0.581688 | 0.688913 | 515 | 515 |
| PSEN1     | 0.024352 | 0.581371 | 0.688619 | 515 | 515 |
| EPB42     | 0.024352 | 0.581371 | 0.688619 | 515 | 99  |
| NUPL2     | 0.024355 | 0.581327 | 0.688619 | 515 | 515 |
| SLC2A2    | 0.024367 | 0.581152 | 0.688482 | 515 | 129 |
| RABGEF1   | 0.024403 | 0.580592 | 0.6879   | 515 | 515 |
| C9orf98   | 0.024404 | 0.580566 | 0.6879   | 515 | 515 |
| TUBGCP3   | 0.024431 | 0.580151 | 0.687541 | 515 | 515 |
| C5orf49   | 0.024431 | 0.580144 | 0.687541 | 515 | 515 |
| LOC100216 | 0.024449 | 0.579878 | 0.687339 | 515 | 515 |
| CTXN3     | 0.024484 | 0.579324 | 0.686764 | 515 | 165 |
| CAMKK2    | 0.024523 | 0.578732 | 0.686161 | 515 | 515 |
| C15orf41  | 0.02453  | 0.578622 | 0.686161 | 515 | 515 |
| ALMS1P    | 0.024537 | 0.578508 | 0.686161 | 515 | 397 |
| STK33     | 0.024544 | 0.578403 | 0.68612  | 515 | 514 |
| SRRD      | 0.024591 | 0.577677 | 0.68534  | 515 | 515 |
| SIP1      | 0.024597 | 0.577574 | 0.685296 | 515 | 515 |
| NCRNA0009 | 0.024636 | 0.576971 | 0.684705 | 515 | 515 |
| STRN3     | 0.024643 | 0.576868 | 0.684624 | 515 | 515 |
| RABL2A    | 0.024702 | 0.575959 | 0.683789 | 515 | 515 |
| PSMB11    | 0.024741 | 0.575356 | 0.683154 | 515 | 94  |
| FAM19A4   | 0.024751 | 0.575202 | 0.683012 | 515 | 311 |
| TBCB      | 0.0248   | 0.57444  | 0.682188 | 515 | 515 |
| TPM2      | 0.024817 | 0.574187 | 0.681969 | 515 | 515 |
| KRTAP19-1 | 0.024824 | 0.574072 | 0.681872 | 515 | 7   |



|          |          |          |          |     |     |
|----------|----------|----------|----------|-----|-----|
| PNRC2    | 0.024826 | 0.574038 | 0.681872 | 515 | 515 |
| ZNF329   | 0.024827 | 0.574023 | 0.681872 | 515 | 515 |
| FLJ40504 | 0.024843 | 0.573775 | 0.681642 | 515 | 211 |
| SPATA3   | 0.024857 | 0.573558 | 0.681464 | 515 | 6   |
| RPS26    | 0.024861 | 0.573507 | 0.681445 | 515 | 515 |
| GALNT6   | 0.024863 | 0.573476 | 0.681445 | 515 | 515 |
| RPL17    | 0.024863 | 0.573468 | 0.681445 | 515 | 515 |
| USP17    | 0.024866 | 0.573431 | 0.681445 | 515 | 20  |
| OXR1     | 0.024884 | 0.573139 | 0.68125  | 515 | 515 |
| SNORA71B | 0.024885 | 0.573137 | 0.68125  | 515 | 62  |
| RPPH1    | 0.024885 | 0.573128 | 0.68125  | 515 | 515 |
| DIAPH3   | 0.024886 | 0.573121 | 0.68125  | 515 | 515 |
| SUV39H1  | 0.024892 | 0.573018 | 0.68125  | 515 | 515 |
| TPD52L3  | 0.024897 | 0.572951 | 0.68125  | 515 | 38  |
| UBXN10   | 0.024911 | 0.572737 | 0.681096 | 515 | 515 |
| KRT12    | 0.024923 | 0.57254  | 0.680902 | 515 | 273 |
| ZKSCAN4  | 0.024935 | 0.572356 | 0.680724 | 515 | 515 |
| THTPA    | 0.024951 | 0.572112 | 0.680474 | 515 | 515 |
| SMO      | 0.025014 | 0.571138 | 0.679558 | 515 | 515 |
| GNASAS   | 0.025052 | 0.570557 | 0.67915  | 515 | 389 |
| NEDD9    | 0.025127 | 0.569408 | 0.678146 | 515 | 515 |
| PLK1     | 0.025145 | 0.56913  | 0.677856 | 515 | 515 |
| NLRP9    | 0.02515  | 0.569054 | 0.677806 | 515 | 464 |
| RTCD1    | 0.025152 | 0.569022 | 0.677806 | 515 | 515 |
| PSMB7    | 0.025158 | 0.568937 | 0.677806 | 515 | 515 |
| TADA3    | 0.02519  | 0.568441 | 0.677519 | 515 | 515 |
| CSN1S1   | 0.0252   | 0.56828  | 0.677368 | 515 | 40  |
| ZBTB37   | 0.025206 | 0.568196 | 0.677308 | 515 | 515 |
| EIF4A2   | 0.025206 | 0.568187 | 0.677308 | 515 | 515 |
| SNORA16A | 0.025207 | 0.56817  | 0.677308 | 515 | 67  |
| C19orf69 | 0.025222 | 0.567953 | 0.677139 | 515 | 348 |
| PIAS2    | 0.025241 | 0.567659 | 0.676911 | 515 | 515 |
| CLMN     | 0.025243 | 0.567631 | 0.676911 | 515 | 515 |
| KIAA0652 | 0.025252 | 0.567484 | 0.676782 | 515 | 515 |
| UTP3     | 0.025277 | 0.5671   | 0.676404 | 515 | 515 |
| FAM169A  | 0.025302 | 0.56672  | 0.676082 | 515 | 515 |
| RASA4P   | 0.025303 | 0.566702 | 0.676082 | 515 | 515 |
| KIF13A   | 0.025307 | 0.566649 | 0.676082 | 515 | 515 |
| ANKRD13C | 0.02533  | 0.566294 | 0.675807 | 515 | 515 |
| RPLPOP2  | 0.025338 | 0.566174 | 0.675744 | 515 | 515 |
| FBX033   | 0.025346 | 0.566047 | 0.675633 | 515 | 515 |
| CEBPB    | 0.025355 | 0.565909 | 0.675509 | 515 | 515 |
| CCDC22   | 0.025359 | 0.565848 | 0.675476 | 515 | 515 |
| PTF1A    | 0.025362 | 0.565796 | 0.675469 | 515 | 65  |
| AADAT    | 0.025375 | 0.565604 | 0.675306 | 515 | 515 |
| C12orf61 | 0.025375 | 0.565596 | 0.675306 | 515 | 514 |
| PTGER1   | 0.025382 | 0.565494 | 0.675255 | 515 | 504 |
| TWISTNB  | 0.025384 | 0.565466 | 0.675255 | 515 | 515 |
| HMGXB3   | 0.025395 | 0.5653   | 0.675144 | 515 | 515 |
| FRAS1    | 0.025443 | 0.564555 | 0.674376 | 515 | 515 |
| C6orf163 | 0.025457 | 0.564338 | 0.674157 | 515 | 506 |
| SLC25A22 | 0.02546  | 0.564303 | 0.674155 | 515 | 515 |
| ADCY8    | 0.025484 | 0.563936 | 0.673918 | 515 | 276 |
| FEZF2    | 0.025502 | 0.56366  | 0.673654 | 515 | 51  |

|           |          |          |          |     |     |
|-----------|----------|----------|----------|-----|-----|
| MUC21     | 0.025506 | 0.563593 | 0.673629 | 515 | 510 |
| C19orf42  | 0.02555  | 0.562921 | 0.673068 | 515 | 515 |
| OR4D2     | 0.025553 | 0.562875 | 0.673068 | 515 | 6   |
| RUSC2     | 0.025569 | 0.562637 | 0.672928 | 515 | 515 |
| HDAC7     | 0.025579 | 0.562479 | 0.672821 | 515 | 515 |
| METTL1    | 0.025625 | 0.56177  | 0.672053 | 515 | 515 |
| PGA4      | 0.025634 | 0.56164  | 0.671937 | 515 | 164 |
| SLC27A2   | 0.025659 | 0.561253 | 0.671514 | 515 | 515 |
| FAM25B    | 0.025667 | 0.561135 | 0.671414 | 515 | 57  |
| ZNF679    | 0.025673 | 0.56105  | 0.671392 | 515 | 63  |
| H6PD      | 0.025689 | 0.560801 | 0.671135 | 515 | 515 |
| C11orf74  | 0.025694 | 0.560718 | 0.671076 | 515 | 515 |
| FOXO3     | 0.025708 | 0.560502 | 0.670903 | 515 | 515 |
| C15orf43  | 0.025727 | 0.560223 | 0.670694 | 515 | 41  |
| LOC284440 | 0.025769 | 0.559582 | 0.670198 | 515 | 515 |
| PCDHAC1   | 0.025819 | 0.558819 | 0.669444 | 515 | 511 |
| GRHPR     | 0.025823 | 0.558757 | 0.66941  | 515 | 515 |
| SUPT7L    | 0.025826 | 0.558704 | 0.669387 | 515 | 515 |
| NEFL      | 0.025887 | 0.557779 | 0.66868  | 515 | 453 |
| DKFZP586I | 0.025892 | 0.557698 | 0.668622 | 515 | 515 |
| NSMCE2    | 0.025911 | 0.557423 | 0.668373 | 515 | 515 |
| C1orf70   | 0.025932 | 0.557091 | 0.668055 | 515 | 503 |
| ZNF75A    | 0.02594  | 0.55697  | 0.66803  | 515 | 515 |
| TAS2R43   | 0.025964 | 0.556605 | 0.667632 | 515 | 187 |
| C14orf129 | 0.025968 | 0.556551 | 0.667607 | 515 | 515 |
| CAMK2D    | 0.025981 | 0.556351 | 0.667407 | 515 | 515 |
| PHF5A     | 0.025984 | 0.556303 | 0.667391 | 515 | 515 |
| OR4F21    | 0.026007 | 0.555963 | 0.667102 | 515 | 10  |
| ZNF221    | 0.026021 | 0.555751 | 0.666928 | 515 | 511 |
| HCRTR1    | 0.026026 | 0.555673 | 0.666875 | 515 | 222 |
| LIPH      | 0.026058 | 0.555184 | 0.666327 | 515 | 514 |
| TPCN2     | 0.026094 | 0.554639 | 0.665793 | 515 | 515 |
| FGF5      | 0.026101 | 0.554529 | 0.665741 | 515 | 325 |
| FANCG     | 0.026113 | 0.554354 | 0.665571 | 515 | 515 |
| HJURP     | 0.026114 | 0.554332 | 0.665571 | 515 | 515 |
| HIST1H2BI | 0.02612  | 0.554245 | 0.665532 | 515 | 189 |
| GCK       | 0.026126 | 0.554148 | 0.665483 | 515 | 481 |
| MTR       | 0.026146 | 0.553839 | 0.665273 | 515 | 515 |
| TMCC1     | 0.026154 | 0.553723 | 0.665213 | 515 | 515 |
| PRKAR1B   | 0.026161 | 0.553625 | 0.665135 | 515 | 515 |
| GPR143    | 0.026182 | 0.553301 | 0.664827 | 515 | 514 |
| NUDT9P1   | 0.026197 | 0.553074 | 0.664633 | 515 | 491 |
| LALBA     | 0.026201 | 0.553007 | 0.664633 | 515 | 20  |
| SLC25A41  | 0.026251 | 0.552249 | 0.663881 | 515 | 418 |
| CXorf23   | 0.026258 | 0.552153 | 0.663806 | 515 | 515 |
| CEP152    | 0.026273 | 0.551915 | 0.663639 | 515 | 515 |
| AP2B1     | 0.026307 | 0.551407 | 0.663188 | 515 | 515 |
| ARL6IP1   | 0.026336 | 0.550963 | 0.662734 | 515 | 515 |
| HCG2P7    | 0.026337 | 0.550955 | 0.662734 | 515 | 460 |
| FTHL3     | 0.026358 | 0.550631 | 0.662454 | 515 | 515 |
| SKA1      | 0.026375 | 0.550379 | 0.66219  | 515 | 515 |
| MIS12     | 0.026387 | 0.55019  | 0.662004 | 515 | 515 |
| INTS12    | 0.02641  | 0.549849 | 0.661713 | 515 | 515 |
| TPT1      | 0.026414 | 0.549786 | 0.661697 | 515 | 515 |

|           |          |          |          |     |     |
|-----------|----------|----------|----------|-----|-----|
| CES4      | 0.026415 | 0.549774 | 0.661697 | 515 | 506 |
| CALHM3    | 0.02642  | 0.549693 | 0.661697 | 515 | 372 |
| TEAD1     | 0.02644  | 0.54939  | 0.661439 | 515 | 515 |
| SLC17A5   | 0.026449 | 0.549265 | 0.661329 | 515 | 515 |
| ARID1B    | 0.026461 | 0.549078 | 0.661143 | 515 | 515 |
| SH3PXD2B  | 0.026463 | 0.549045 | 0.661143 | 515 | 515 |
| PPAN-P2RY | 0.026467 | 0.548991 | 0.661117 | 515 | 220 |
| KRT82     | 0.026499 | 0.548501 | 0.660806 | 515 | 22  |
| ZNF192    | 0.026503 | 0.54845  | 0.660785 | 515 | 515 |
| TSNAX-DIS | 0.026528 | 0.548072 | 0.660448 | 515 | 191 |
| MGC2889   | 0.026552 | 0.547705 | 0.660047 | 515 | 335 |
| ADIG      | 0.026554 | 0.547675 | 0.660047 | 515 | 17  |
| GUCA1C    | 0.026555 | 0.547653 | 0.660047 | 515 | 13  |
| ARF4      | 0.026564 | 0.547523 | 0.659946 | 515 | 515 |
| ZYG11B    | 0.026611 | 0.54681  | 0.659246 | 515 | 515 |
| ACSM2B    | 0.026648 | 0.546257 | 0.658738 | 515 | 86  |
| GSDMC     | 0.026649 | 0.546249 | 0.658738 | 515 | 515 |
| ABCA12    | 0.02667  | 0.545922 | 0.658413 | 515 | 509 |
| DAPK1     | 0.026679 | 0.545798 | 0.658343 | 515 | 515 |
| PAGE3     | 0.026683 | 0.545723 | 0.658343 | 515 | 26  |
| TMEM139   | 0.026687 | 0.545669 | 0.658343 | 515 | 514 |
| RERGL     | 0.026701 | 0.545461 | 0.658215 | 515 | 447 |
| MYH9      | 0.026705 | 0.545399 | 0.65818  | 515 | 515 |
| NCRNA0002 | 0.026709 | 0.545339 | 0.658147 | 515 | 12  |
| ARHGEF18  | 0.026717 | 0.545217 | 0.65804  | 515 | 515 |
| CASD1     | 0.026737 | 0.544915 | 0.657755 | 515 | 515 |
| FAM184A   | 0.02676  | 0.544573 | 0.657461 | 515 | 515 |
| C3orf26   | 0.026761 | 0.544558 | 0.657461 | 515 | 515 |
| GPRASP2   | 0.026791 | 0.544103 | 0.657052 | 515 | 515 |
| GSTTP2    | 0.026822 | 0.543643 | 0.656576 | 515 | 28  |
| ZNF815    | 0.026827 | 0.543559 | 0.656514 | 515 | 515 |
| MED30     | 0.026828 | 0.543542 | 0.656514 | 515 | 515 |
| GPR153    | 0.026867 | 0.54296  | 0.655989 | 515 | 515 |
| SNX12     | 0.026904 | 0.542415 | 0.65541  | 515 | 515 |
| C1orf204  | 0.026922 | 0.542136 | 0.655231 | 515 | 515 |
| C5orf46   | 0.026941 | 0.541849 | 0.654964 | 515 | 425 |
| FASTKD3   | 0.026993 | 0.541077 | 0.65415  | 515 | 515 |
| CAMTA1    | 0.027    | 0.540967 | 0.654056 | 515 | 515 |
| LRRC37B   | 0.027029 | 0.540538 | 0.653695 | 515 | 515 |
| NEUROG3   | 0.027048 | 0.540252 | 0.653468 | 515 | 173 |
| MOGAT2    | 0.027055 | 0.540144 | 0.65338  | 515 | 250 |
| SYT3      | 0.027062 | 0.54004  | 0.65333  | 515 | 498 |
| AFF2      | 0.027065 | 0.539996 | 0.65333  | 515 | 514 |
| ENTPD3    | 0.027084 | 0.539708 | 0.65311  | 515 | 515 |
| FOXD4L2   | 0.027127 | 0.539066 | 0.652626 | 515 | 477 |
| AGGF1     | 0.027161 | 0.538555 | 0.652166 | 515 | 515 |
| SLC24A3   | 0.027178 | 0.538302 | 0.652017 | 515 | 515 |
| C22orf28  | 0.027185 | 0.538201 | 0.651934 | 515 | 515 |
| BLOC1S1   | 0.027187 | 0.538171 | 0.651934 | 515 | 515 |
| ZNF12     | 0.027192 | 0.538093 | 0.651883 | 515 | 515 |
| PON1      | 0.027192 | 0.538089 | 0.651883 | 515 | 496 |
| FAM75A5   | 0.027198 | 0.538006 | 0.651856 | 515 | 18  |
| CYP24A1   | 0.027209 | 0.537845 | 0.65174  | 515 | 513 |
| TAS2R40   | 0.027231 | 0.537515 | 0.651419 | 515 | 101 |

|           |          |          |          |     |     |
|-----------|----------|----------|----------|-----|-----|
| PCDHGA4   | 0.027246 | 0.537286 | 0.65122  | 515 | 511 |
| C16orf82  | 0.027259 | 0.537087 | 0.651058 | 515 | 46  |
| PRO0628   | 0.027263 | 0.537039 | 0.65104  | 515 | 407 |
| ZNF148    | 0.02727  | 0.536927 | 0.650943 | 515 | 515 |
| DHFRL1    | 0.027313 | 0.536281 | 0.650396 | 515 | 515 |
| FAM120AOS | 0.027352 | 0.535711 | 0.64977  | 515 | 515 |
| C15orf55  | 0.02743  | 0.534537 | 0.648676 | 515 | 266 |
| ZNF702P   | 0.027447 | 0.534282 | 0.648444 | 515 | 515 |
| URM1      | 0.027468 | 0.533974 | 0.648109 | 515 | 515 |
| SPDYE1    | 0.027505 | 0.533426 | 0.64768  | 515 | 515 |
| CDC42EP4  | 0.027508 | 0.533377 | 0.64768  | 515 | 515 |
| CSNK1G2   | 0.027515 | 0.533279 | 0.64762  | 515 | 515 |
| C19orf55  | 0.027519 | 0.533208 | 0.647573 | 515 | 515 |
| MRI1      | 0.027545 | 0.532829 | 0.647246 | 515 | 515 |
| C1orf101  | 0.027555 | 0.532681 | 0.647132 | 515 | 511 |
| KRTAP13-1 | 0.027562 | 0.532571 | 0.647075 | 515 | 9   |
| GART      | 0.027568 | 0.532487 | 0.647012 | 515 | 515 |
| COX11     | 0.027578 | 0.532341 | 0.646947 | 515 | 515 |
| S100A7    | 0.027583 | 0.532264 | 0.646937 | 515 | 266 |
| PCNAP1    | 0.027634 | 0.531507 | 0.646096 | 515 | 16  |
| PTCHD1    | 0.027635 | 0.531495 | 0.646096 | 515 | 468 |
| ST7L      | 0.027641 | 0.531398 | 0.646043 | 515 | 515 |
| DAPK2     | 0.027659 | 0.531129 | 0.645794 | 515 | 515 |
| OR2AT4    | 0.027675 | 0.530892 | 0.645585 | 515 | 21  |
| PTPRR     | 0.027698 | 0.530559 | 0.645322 | 515 | 512 |
| LOC146481 | 0.027766 | 0.529538 | 0.644251 | 515 | 8   |
| ACCS      | 0.027788 | 0.529214 | 0.643975 | 515 | 515 |
| ABRA      | 0.027797 | 0.529085 | 0.643857 | 515 | 350 |
| SNW1      | 0.027808 | 0.528927 | 0.643784 | 515 | 515 |
| ATRNL1    | 0.027808 | 0.528916 | 0.643784 | 515 | 450 |
| PPM1D     | 0.027813 | 0.528855 | 0.643784 | 515 | 515 |
| FNBP4     | 0.027819 | 0.528762 | 0.643784 | 515 | 515 |
| C6orf227  | 0.027845 | 0.528381 | 0.643557 | 515 | 420 |
| PTPRS     | 0.027856 | 0.528204 | 0.643451 | 515 | 515 |
| NNAT      | 0.027864 | 0.528086 | 0.643425 | 515 | 515 |
| IFNA4     | 0.027905 | 0.527488 | 0.642748 | 515 | 7   |
| LOC728024 | 0.027905 | 0.527485 | 0.642748 | 515 | 515 |
| SCG3      | 0.027918 | 0.527291 | 0.642652 | 515 | 482 |
| BAG4      | 0.027937 | 0.527012 | 0.642429 | 515 | 515 |
| OR51B2    | 0.02796  | 0.526677 | 0.642138 | 515 | 66  |
| OR10A4    | 0.027968 | 0.526555 | 0.642029 | 515 | 22  |
| TMEM39B   | 0.027992 | 0.526204 | 0.641796 | 515 | 515 |
| CCDC73    | 0.028008 | 0.525963 | 0.64162  | 515 | 515 |
| STRADB    | 0.028023 | 0.525744 | 0.641432 | 515 | 515 |
| FKBP7     | 0.028048 | 0.525371 | 0.641015 | 515 | 515 |
| CGB1      | 0.02806  | 0.525186 | 0.640868 | 515 | 81  |
| FUT10     | 0.028076 | 0.524963 | 0.640675 | 515 | 515 |
| C9orf129  | 0.028076 | 0.52495  | 0.640675 | 515 | 515 |
| LCE1F     | 0.028105 | 0.524531 | 0.640303 | 515 | 5   |
| EMID1     | 0.028153 | 0.523815 | 0.639547 | 515 | 515 |
| CLU       | 0.028162 | 0.523687 | 0.639469 | 515 | 515 |
| OR5A2     | 0.028184 | 0.52336  | 0.639147 | 515 | 4   |
| SNORA9    | 0.028185 | 0.523348 | 0.639147 | 515 | 63  |
| HKDC1     | 0.028206 | 0.52304  | 0.638873 | 515 | 515 |

|           |          |          |          |     |     |
|-----------|----------|----------|----------|-----|-----|
| HIST1H4F  | 0.028216 | 0.522889 | 0.638767 | 515 | 60  |
| C10orf25  | 0.02829  | 0.521798 | 0.637745 | 515 | 515 |
| SLC22A13  | 0.028292 | 0.521771 | 0.637745 | 515 | 321 |
| C16orf71  | 0.028302 | 0.521629 | 0.637617 | 515 | 515 |
| PTTG3P    | 0.028312 | 0.521476 | 0.637475 | 515 | 486 |
| EMP2      | 0.028313 | 0.521466 | 0.637475 | 515 | 515 |
| TMEM55B   | 0.028338 | 0.521095 | 0.63712  | 515 | 515 |
| NADSYN1   | 0.02835  | 0.520924 | 0.63699  | 515 | 515 |
| MBLAC2    | 0.028362 | 0.520739 | 0.63688  | 515 | 515 |
| ZNF738    | 0.028381 | 0.520465 | 0.636662 | 515 | 515 |
| PTPDC1    | 0.02841  | 0.520044 | 0.636186 | 515 | 515 |
| ADORA2B   | 0.028425 | 0.519809 | 0.636015 | 515 | 515 |
| NME7      | 0.02844  | 0.519602 | 0.635801 | 515 | 515 |
| DNAJC9    | 0.02845  | 0.519445 | 0.635711 | 515 | 515 |
| APOA4     | 0.028462 | 0.519273 | 0.635554 | 515 | 112 |
| CPEB3     | 0.028466 | 0.519216 | 0.635554 | 515 | 515 |
| CENPA     | 0.028473 | 0.519109 | 0.63547  | 515 | 515 |
| GLE1      | 0.028481 | 0.519001 | 0.635407 | 515 | 515 |
| ANLN      | 0.0285   | 0.518708 | 0.635173 | 515 | 515 |
| MAST4     | 0.028503 | 0.518677 | 0.635173 | 515 | 515 |
| SNORA34   | 0.028517 | 0.518459 | 0.634947 | 515 | 87  |
| RNF111    | 0.028522 | 0.51839  | 0.634901 | 515 | 515 |
| PCA3      | 0.028534 | 0.518223 | 0.634735 | 515 | 149 |
| USO1      | 0.028538 | 0.518155 | 0.63469  | 515 | 515 |
| HTR3A     | 0.028553 | 0.517932 | 0.634457 | 515 | 509 |
| IGSF22    | 0.02856  | 0.51783  | 0.634409 | 515 | 513 |
| ADAM5P    | 0.02858  | 0.517548 | 0.634141 | 515 | 20  |
| TACR2     | 0.028584 | 0.517481 | 0.634098 | 515 | 514 |
| CRISP2    | 0.02859  | 0.517399 | 0.634036 | 515 | 342 |
| TRIM74    | 0.028594 | 0.517341 | 0.634005 | 515 | 425 |
| RINT1     | 0.028595 | 0.517316 | 0.634005 | 515 | 515 |
| ST8SIA3   | 0.028629 | 0.516828 | 0.633553 | 515 | 117 |
| SLC25A18  | 0.028641 | 0.516641 | 0.633419 | 515 | 514 |
| XRN2      | 0.028643 | 0.51662  | 0.633419 | 515 | 515 |
| CAMSAP1   | 0.028671 | 0.516205 | 0.633039 | 515 | 515 |
| WASF1     | 0.028673 | 0.516181 | 0.633039 | 515 | 515 |
| SERPINB11 | 0.028683 | 0.516037 | 0.63295  | 515 | 211 |
| LOC283914 | 0.028689 | 0.515944 | 0.632874 | 515 | 8   |
| LOC401127 | 0.028762 | 0.514874 | 0.631716 | 515 | 513 |
| SNORA21   | 0.028768 | 0.514783 | 0.631644 | 515 | 96  |
| C3orf32   | 0.028786 | 0.51453  | 0.631412 | 515 | 454 |
| SNORA40   | 0.0288   | 0.514326 | 0.6312   | 515 | 130 |
| SFTPB     | 0.028816 | 0.514082 | 0.630939 | 515 | 515 |
| C3orf79   | 0.028833 | 0.513837 | 0.630755 | 515 | 35  |
| AMHR2     | 0.02889  | 0.513001 | 0.629766 | 515 | 471 |
| PRKAR2A   | 0.028902 | 0.512831 | 0.629596 | 515 | 515 |
| POLR1E    | 0.028971 | 0.511819 | 0.628587 | 515 | 515 |
| CSDA      | 0.028993 | 0.5115   | 0.628272 | 515 | 515 |
| SCARNA16  | 0.029004 | 0.51135  | 0.628126 | 515 | 388 |
| FRG2      | 0.029025 | 0.511043 | 0.627826 | 515 | 90  |
| NCRNA0009 | 0.02903  | 0.510962 | 0.627767 | 515 | 492 |
| HMGB1     | 0.029031 | 0.510946 | 0.627767 | 515 | 515 |
| LYPD3     | 0.02906  | 0.510531 | 0.627389 | 515 | 515 |
| OR4E2     | 0.029079 | 0.510257 | 0.627091 | 515 | 40  |

|           |          |          |          |     |     |
|-----------|----------|----------|----------|-----|-----|
| ACOT2     | 0.029095 | 0.510015 | 0.626948 | 515 | 515 |
| AAA1      | 0.029099 | 0.509957 | 0.626915 | 515 | 158 |
| PARD3B    | 0.029106 | 0.509859 | 0.626834 | 515 | 515 |
| BTNL3     | 0.02915  | 0.50922  | 0.626202 | 515 | 241 |
| STK32B    | 0.029179 | 0.508795 | 0.625757 | 515 | 514 |
| DTL       | 0.029192 | 0.50861  | 0.625568 | 515 | 515 |
| ZRANB3    | 0.029198 | 0.508527 | 0.625504 | 515 | 515 |
| KLHL36    | 0.029206 | 0.508414 | 0.625403 | 515 | 515 |
| DEPDC1    | 0.029211 | 0.508331 | 0.62534  | 515 | 515 |
| EIF1AX    | 0.02922  | 0.508205 | 0.625262 | 515 | 515 |
| C20orf114 | 0.029249 | 0.507786 | 0.624784 | 515 | 509 |
| SH3D20    | 0.029267 | 0.507525 | 0.624541 | 515 | 515 |
| GPR108    | 0.029289 | 0.507202 | 0.624181 | 515 | 515 |
| FAHD2A    | 0.029301 | 0.507032 | 0.62401  | 515 | 515 |
| CD164     | 0.029341 | 0.506446 | 0.623428 | 515 | 515 |
| TTC26     | 0.029358 | 0.506207 | 0.623188 | 515 | 515 |
| C11orf85  | 0.029367 | 0.506071 | 0.623096 | 515 | 318 |
| ABHD3     | 0.029368 | 0.506059 | 0.623096 | 515 | 515 |
| KIAA1377  | 0.029417 | 0.505349 | 0.62236  | 515 | 515 |
| OR1B1     | 0.029419 | 0.505318 | 0.62236  | 515 | 56  |
| RPP30     | 0.029438 | 0.505039 | 0.622056 | 515 | 515 |
| PSORS1C2  | 0.029439 | 0.50503  | 0.622056 | 515 | 434 |
| C5        | 0.029442 | 0.50498  | 0.622056 | 515 | 515 |
| SMCR8     | 0.029446 | 0.504922 | 0.622027 | 515 | 515 |
| C4orf51   | 0.029456 | 0.504777 | 0.621886 | 515 | 44  |
| SNHG5     | 0.029473 | 0.504534 | 0.621626 | 515 | 515 |
| PRSS37    | 0.029474 | 0.504516 | 0.621626 | 515 | 180 |
| OR4F5     | 0.029491 | 0.504271 | 0.621378 | 515 | 10  |
| ST70T2    | 0.029492 | 0.504259 | 0.621378 | 515 | 190 |
| DIRAS1    | 0.029494 | 0.504226 | 0.621378 | 515 | 514 |
| HPGD      | 0.029509 | 0.50402  | 0.62126  | 515 | 515 |
| C1orf61   | 0.029516 | 0.50392  | 0.621175 | 515 | 484 |
| RPL27     | 0.029526 | 0.50377  | 0.621028 | 515 | 515 |
| GABBR2    | 0.029526 | 0.503767 | 0.621028 | 515 | 504 |
| NACAD     | 0.029567 | 0.503184 | 0.620497 | 515 | 515 |
| ATP5S     | 0.029584 | 0.502931 | 0.620223 | 515 | 515 |
| ABCB5     | 0.029613 | 0.502507 | 0.619854 | 515 | 348 |
| LOC153684 | 0.029634 | 0.502204 | 0.619595 | 515 | 515 |
| USP31     | 0.029652 | 0.501949 | 0.619395 | 515 | 515 |
| SNORA71D  | 0.029662 | 0.501813 | 0.619265 | 515 | 38  |
| SRPK2     | 0.029676 | 0.501608 | 0.619088 | 515 | 515 |
| OR1N2     | 0.029696 | 0.501314 | 0.61884  | 515 | 26  |
| AGT       | 0.029707 | 0.501157 | 0.618685 | 515 | 515 |
| GPAT2     | 0.029718 | 0.501    | 0.618529 | 515 | 513 |
| TP53TG5   | 0.029739 | 0.500692 | 0.618213 | 515 | 146 |
| ZNF816A   | 0.029749 | 0.500552 | 0.618091 | 515 | 515 |
| C22orf31  | 0.029754 | 0.500477 | 0.618036 | 515 | 393 |
| LOC340357 | 0.029762 | 0.500371 | 0.617982 | 515 | 17  |
| WDR55     | 0.029834 | 0.499335 | 0.616893 | 515 | 515 |
| ENPEP     | 0.029842 | 0.499219 | 0.616788 | 515 | 515 |
| LOC284551 | 0.029843 | 0.499206 | 0.616788 | 515 | 375 |
| OPN1LW    | 0.029844 | 0.499186 | 0.616788 | 515 | 22  |
| DEFB124   | 0.029854 | 0.49904  | 0.616719 | 515 | 39  |
| INPP5E    | 0.02986  | 0.498949 | 0.616645 | 515 | 515 |

|           |          |          |          |     |     |
|-----------|----------|----------|----------|-----|-----|
| PRDM14    | 0.029869 | 0.498819 | 0.616631 | 515 | 51  |
| LOC440944 | 0.029875 | 0.498744 | 0.616581 | 515 | 515 |
| NCRNA0011 | 0.029937 | 0.497851 | 0.615554 | 515 | 515 |
| SYTL1     | 0.029979 | 0.497239 | 0.61495  | 515 | 515 |
| CXCR7     | 0.02998  | 0.497228 | 0.61495  | 515 | 515 |
| CCDC7     | 0.029981 | 0.49722  | 0.61495  | 515 | 515 |
| LOC645166 | 0.029992 | 0.497063 | 0.61495  | 515 | 515 |
| ADSL      | 0.029999 | 0.496958 | 0.614869 | 515 | 515 |
| UBE3C     | 0.030021 | 0.496635 | 0.614507 | 515 | 515 |
| FAM194B   | 0.030027 | 0.496556 | 0.614446 | 515 | 8   |
| FLJ33630  | 0.030034 | 0.496455 | 0.614398 | 515 | 515 |
| SRP72     | 0.030047 | 0.496268 | 0.614285 | 515 | 515 |
| LRRC37A2  | 0.030058 | 0.496115 | 0.614205 | 515 | 515 |
| HOXA7     | 0.030106 | 0.495427 | 0.613527 | 515 | 514 |
| TNNI3     | 0.030111 | 0.495355 | 0.613492 | 515 | 443 |
| COL4A6    | 0.030121 | 0.495207 | 0.613347 | 515 | 505 |
| LRP2BP    | 0.030149 | 0.494806 | 0.612927 | 515 | 515 |
| C19orf60  | 0.030165 | 0.494573 | 0.61279  | 515 | 515 |
| SKI       | 0.030191 | 0.494212 | 0.612494 | 515 | 515 |
| RBP7      | 0.030205 | 0.494008 | 0.612318 | 515 | 515 |
| MFSD11    | 0.03021  | 0.493935 | 0.612265 | 515 | 515 |
| EPHB1     | 0.030234 | 0.493589 | 0.61195  | 515 | 515 |
| NCRNA0020 | 0.03025  | 0.493368 | 0.611714 | 515 | 112 |
| WBSCR28   | 0.030257 | 0.49326  | 0.611618 | 515 | 449 |
| ZNF662    | 0.03035  | 0.491937 | 0.610243 | 515 | 515 |
| NLGN1     | 0.030359 | 0.491806 | 0.610156 | 515 | 473 |
| LOC400043 | 0.030376 | 0.491568 | 0.609898 | 515 | 515 |
| FAM66A    | 0.03042  | 0.490938 | 0.609267 | 515 | 358 |
| CHKB      | 0.030435 | 0.490723 | 0.60919  | 515 | 515 |
| MPP6      | 0.030458 | 0.490397 | 0.608936 | 515 | 515 |
| ZFAND5    | 0.030474 | 0.490164 | 0.60873  | 515 | 515 |
| RRAS2     | 0.030484 | 0.490026 | 0.608627 | 515 | 515 |
| FAM63B    | 0.030489 | 0.489959 | 0.608627 | 515 | 515 |
| ARID3B    | 0.030493 | 0.489892 | 0.608612 | 515 | 515 |
| LPL       | 0.030497 | 0.489843 | 0.608589 | 515 | 515 |
| SARS      | 0.030524 | 0.489456 | 0.608297 | 515 | 515 |
| FGF16     | 0.030526 | 0.489431 | 0.608297 | 515 | 66  |
| GPR180    | 0.030567 | 0.488846 | 0.607728 | 515 | 515 |
| CCNT2     | 0.030644 | 0.487743 | 0.606584 | 515 | 515 |
| LOC100289 | 0.030647 | 0.487702 | 0.60657  | 515 | 515 |
| EXOC2     | 0.030676 | 0.487294 | 0.606138 | 515 | 515 |
| TIAL1     | 0.030686 | 0.487148 | 0.606013 | 515 | 515 |
| PRKAG3    | 0.030697 | 0.486989 | 0.605872 | 515 | 104 |
| KIF26A    | 0.030707 | 0.486849 | 0.605811 | 515 | 515 |
| MED13     | 0.030719 | 0.486689 | 0.605763 | 515 | 515 |
| ZBTB7A    | 0.030719 | 0.486688 | 0.605763 | 515 | 515 |
| SALL1     | 0.030726 | 0.486586 | 0.605748 | 515 | 387 |
| NHLH1     | 0.030731 | 0.486511 | 0.605692 | 515 | 502 |
| C6orf208  | 0.030762 | 0.486066 | 0.605289 | 515 | 465 |
| SERTAD4   | 0.030789 | 0.485687 | 0.604892 | 515 | 515 |
| WDSUB1    | 0.030795 | 0.48561  | 0.604834 | 515 | 515 |
| CACNB1    | 0.030796 | 0.485588 | 0.604834 | 515 | 515 |
| INTU      | 0.030805 | 0.485463 | 0.604726 | 515 | 515 |
| LOC200726 | 0.030812 | 0.485357 | 0.604707 | 515 | 19  |

|           |          |          |          |     |     |
|-----------|----------|----------|----------|-----|-----|
| KRT35     | 0.030825 | 0.485182 | 0.604527 | 515 | 7   |
| KLKP1     | 0.030868 | 0.484569 | 0.603876 | 515 | 146 |
| MEX3C     | 0.03087  | 0.484544 | 0.603876 | 515 | 515 |
| MYBL2     | 0.030886 | 0.484312 | 0.603638 | 515 | 515 |
| PGA5      | 0.030896 | 0.484181 | 0.603543 | 515 | 174 |
| TP53TG1   | 0.030898 | 0.48415  | 0.603542 | 515 | 515 |
| OR2A14    | 0.030907 | 0.48402  | 0.603456 | 515 | 80  |
| OR5T3     | 0.030912 | 0.48395  | 0.603406 | 515 | 4   |
| BRWD3     | 0.030924 | 0.483781 | 0.603257 | 515 | 515 |
| TMUB2     | 0.030927 | 0.48374  | 0.603257 | 515 | 515 |
| ADCY10    | 0.030946 | 0.483473 | 0.603036 | 515 | 393 |
| ECE1      | 0.030954 | 0.483355 | 0.602965 | 515 | 515 |
| ABL2      | 0.030983 | 0.48294  | 0.602538 | 515 | 515 |
| NDUFB3    | 0.030989 | 0.482854 | 0.602528 | 515 | 515 |
| ZNF749    | 0.031039 | 0.482147 | 0.601796 | 515 | 515 |
| TCN1      | 0.031064 | 0.481804 | 0.60148  | 515 | 479 |
| NXT1      | 0.031078 | 0.481596 | 0.601333 | 515 | 515 |
| C3orf70   | 0.031099 | 0.481307 | 0.60101  | 515 | 515 |
| ABCD1     | 0.031107 | 0.481193 | 0.600904 | 515 | 515 |
| MYEOV     | 0.031131 | 0.480855 | 0.600596 | 515 | 511 |
| SLC6A5    | 0.031139 | 0.480738 | 0.600487 | 515 | 22  |
| ETV5      | 0.031149 | 0.480595 | 0.600383 | 515 | 515 |
| AKT2      | 0.0312   | 0.479884 | 0.599781 | 515 | 515 |
| LOC646813 | 0.031202 | 0.479847 | 0.599781 | 515 | 14  |
| ATXN3     | 0.031212 | 0.479712 | 0.59973  | 515 | 515 |
| FAM115A   | 0.031233 | 0.47942  | 0.599402 | 515 | 515 |
| ADH6      | 0.031244 | 0.47926  | 0.599278 | 515 | 453 |
| ABI2      | 0.031251 | 0.479169 | 0.5992   | 515 | 515 |
| SNORA31   | 0.031263 | 0.478993 | 0.599056 | 515 | 140 |
| NOP10     | 0.031271 | 0.478882 | 0.598992 | 515 | 515 |
| NAGPA     | 0.031274 | 0.478842 | 0.59898  | 515 | 515 |
| STON2     | 0.031281 | 0.47874  | 0.59889  | 515 | 515 |
| PCGF6     | 0.031294 | 0.478563 | 0.59877  | 515 | 515 |
| ELOVL5    | 0.031312 | 0.478301 | 0.59864  | 515 | 515 |
| PMEPA1    | 0.031331 | 0.478042 | 0.59839  | 515 | 515 |
| NUDT12    | 0.031332 | 0.478029 | 0.59839  | 515 | 515 |
| LYAR      | 0.031339 | 0.477923 | 0.598322 | 515 | 515 |
| GNAQ      | 0.03135  | 0.477776 | 0.598245 | 515 | 515 |
| AADACL4   | 0.031351 | 0.47776  | 0.598245 | 515 | 93  |
| POTEG     | 0.031353 | 0.477727 | 0.598245 | 515 | 59  |
| FAM162A   | 0.031363 | 0.477582 | 0.598153 | 515 | 515 |
| TULP2     | 0.031372 | 0.477461 | 0.598076 | 515 | 367 |
| COL4A4    | 0.031377 | 0.477395 | 0.598031 | 515 | 515 |
| FBX09     | 0.031388 | 0.477236 | 0.597975 | 515 | 515 |
| LMF2      | 0.031393 | 0.477163 | 0.597927 | 515 | 515 |
| HSD17B7P2 | 0.031435 | 0.476581 | 0.597235 | 515 | 515 |
| GPR135    | 0.031447 | 0.476411 | 0.59706  | 515 | 514 |
| CCDC63    | 0.031521 | 0.475373 | 0.595983 | 515 | 107 |
| HAUS8     | 0.031533 | 0.475203 | 0.595882 | 515 | 515 |
| USP14     | 0.031559 | 0.474844 | 0.595507 | 515 | 515 |
| CASC1     | 0.031588 | 0.474438 | 0.595147 | 515 | 510 |
| SYCE2     | 0.0316   | 0.474265 | 0.595042 | 515 | 509 |
| UPK3BL    | 0.031617 | 0.474025 | 0.594852 | 515 | 503 |
| IL31      | 0.031633 | 0.473805 | 0.594613 | 515 | 21  |



|           |          |          |          |     |     |
|-----------|----------|----------|----------|-----|-----|
| ANKRD10   | 0.031659 | 0.473437 | 0.594264 | 515 | 515 |
| C6orf145  | 0.031671 | 0.473279 | 0.59414  | 515 | 515 |
| ZIC5      | 0.031674 | 0.473235 | 0.594123 | 515 | 292 |
| TPX2      | 0.031689 | 0.473025 | 0.593897 | 515 | 515 |
| RNASE7    | 0.031701 | 0.472848 | 0.593785 | 515 | 310 |
| C22orf23  | 0.03173  | 0.472451 | 0.593437 | 515 | 515 |
| PRRT3     | 0.031769 | 0.471898 | 0.592853 | 515 | 515 |
| HS2ST1    | 0.031801 | 0.471452 | 0.592405 | 515 | 515 |
| GNAT2     | 0.031814 | 0.471281 | 0.592228 | 515 | 437 |
| FOXDL1    | 0.031834 | 0.470995 | 0.591905 | 515 | 507 |
| LOC415056 | 0.031834 | 0.470995 | 0.591905 | 515 | 34  |
| C1QL2     | 0.031898 | 0.4701   | 0.590966 | 515 | 372 |
| TMEM195   | 0.031924 | 0.469742 | 0.590591 | 515 | 395 |
| NDST1     | 0.031937 | 0.469561 | 0.5904   | 515 | 515 |
| LENG1     | 0.031943 | 0.469476 | 0.59033  | 515 | 515 |
| CCT6P1    | 0.031971 | 0.469086 | 0.589914 | 515 | 515 |
| IL2ORA    | 0.031979 | 0.46898  | 0.589855 | 515 | 515 |
| GNRHR     | 0.031991 | 0.468808 | 0.589675 | 515 | 483 |
| RNASEH2C  | 0.032008 | 0.468582 | 0.58954  | 515 | 515 |
| VMAC      | 0.032065 | 0.467778 | 0.588796 | 515 | 515 |
| GPHA2     | 0.032073 | 0.467674 | 0.588768 | 515 | 344 |
| KLC1      | 0.032079 | 0.467596 | 0.588744 | 515 | 515 |
| IFNA14    | 0.032084 | 0.46752  | 0.588722 | 515 | 15  |
| OR10G8    | 0.032086 | 0.467493 | 0.588722 | 515 | 4   |
| CHRD12    | 0.032094 | 0.467381 | 0.588659 | 515 | 511 |
| TXLNG     | 0.032137 | 0.466779 | 0.588048 | 515 | 515 |
| ZNF792    | 0.032142 | 0.466712 | 0.588038 | 515 | 515 |
| SNORA68   | 0.032176 | 0.46625  | 0.587567 | 515 | 69  |
| COX7B     | 0.032179 | 0.466201 | 0.587543 | 515 | 515 |
| H1FOO     | 0.032227 | 0.465542 | 0.586898 | 515 | 27  |
| SCGB2A1   | 0.032233 | 0.465458 | 0.586853 | 515 | 454 |
| C16orf87  | 0.032233 | 0.465451 | 0.586853 | 515 | 515 |
| SEC24B    | 0.032284 | 0.464752 | 0.586227 | 515 | 515 |
| CLRN1     | 0.032312 | 0.464359 | 0.585849 | 515 | 29  |
| PTTG2     | 0.032333 | 0.464072 | 0.585628 | 515 | 372 |
| BRAF      | 0.032378 | 0.463448 | 0.585106 | 515 | 515 |
| C19orf40  | 0.032384 | 0.463363 | 0.585035 | 515 | 515 |
| TMEM67    | 0.032429 | 0.46275  | 0.584497 | 515 | 515 |
| RPSA      | 0.03243  | 0.462728 | 0.584497 | 515 | 515 |
| ISL1      | 0.032469 | 0.462194 | 0.583916 | 515 | 341 |
| EPHX4     | 0.032476 | 0.462097 | 0.583916 | 515 | 515 |
| C2orf77   | 0.03251  | 0.461621 | 0.583456 | 515 | 515 |
| PLCB4     | 0.032534 | 0.461289 | 0.583191 | 515 | 515 |
| NCRNA0008 | 0.032548 | 0.4611   | 0.583025 | 515 | 515 |
| SMCP      | 0.032562 | 0.460903 | 0.582814 | 515 | 18  |
| ENHO      | 0.032571 | 0.460788 | 0.582705 | 515 | 500 |
| C4orf12   | 0.032579 | 0.460682 | 0.582607 | 515 | 515 |
| FSD2      | 0.03258  | 0.460668 | 0.582607 | 515 | 285 |
| ST7OT4    | 0.032582 | 0.46064  | 0.582607 | 515 | 415 |
| DIXDC1    | 0.032599 | 0.460406 | 0.58237  | 515 | 515 |
| CDK18     | 0.032607 | 0.460291 | 0.582297 | 515 | 515 |
| KLHDC8A   | 0.032612 | 0.460218 | 0.582241 | 515 | 513 |
| KCTD14    | 0.032621 | 0.460092 | 0.58217  | 515 | 515 |
| LYG1      | 0.03266  | 0.459562 | 0.581695 | 515 | 507 |

|           |          |          |          |     |     |
|-----------|----------|----------|----------|-----|-----|
| SLC16A12  | 0.032661 | 0.459553 | 0.581695 | 515 | 510 |
| TMEM132E  | 0.032668 | 0.459445 | 0.581631 | 515 | 508 |
| MS4A12    | 0.032676 | 0.459344 | 0.581541 | 515 | 18  |
| DTX2      | 0.032676 | 0.459342 | 0.581541 | 515 | 515 |
| GHSR      | 0.032688 | 0.459173 | 0.581399 | 515 | 57  |
| H2AFZ     | 0.032692 | 0.459115 | 0.581362 | 515 | 515 |
| SNORA46   | 0.032734 | 0.458547 | 0.580753 | 515 | 17  |
| ANKRD30A  | 0.032738 | 0.458496 | 0.580724 | 515 | 26  |
| PAK7      | 0.032762 | 0.458157 | 0.580369 | 515 | 314 |
| SH3BGR    | 0.032781 | 0.457898 | 0.580111 | 515 | 515 |
| SLC39A10  | 0.032786 | 0.457832 | 0.580067 | 515 | 515 |
| TCP11L2   | 0.032787 | 0.457818 | 0.580067 | 515 | 515 |
| SGPL1     | 0.032816 | 0.457415 | 0.57965  | 515 | 515 |
| ORC4L     | 0.032829 | 0.457245 | 0.57947  | 515 | 515 |
| FSCB      | 0.03283  | 0.457221 | 0.57947  | 515 | 63  |
| PPIAL4G   | 0.032874 | 0.456624 | 0.578868 | 515 | 515 |
| ZDHC18    | 0.032901 | 0.45626  | 0.578516 | 515 | 515 |
| SSR4      | 0.032914 | 0.456075 | 0.578318 | 515 | 515 |
| ZFAND6    | 0.032944 | 0.455668 | 0.577876 | 515 | 515 |
| KRTAP4-12 | 0.032963 | 0.455402 | 0.577606 | 515 | 30  |
| CST3      | 0.032969 | 0.455323 | 0.577584 | 515 | 515 |
| ID3       | 0.032993 | 0.454995 | 0.577204 | 515 | 515 |
| RBM17     | 0.033009 | 0.454772 | 0.577032 | 515 | 515 |
| NUDT21    | 0.03301  | 0.454767 | 0.577032 | 515 | 515 |
| SRPRB     | 0.033016 | 0.454686 | 0.576997 | 515 | 515 |
| PRSS12    | 0.03305  | 0.454221 | 0.576442 | 515 | 513 |
| GUK1      | 0.033051 | 0.454202 | 0.576442 | 515 | 515 |
| SERPINA13 | 0.033113 | 0.453362 | 0.575526 | 515 | 13  |
| GPR78     | 0.033122 | 0.45323  | 0.575405 | 515 | 143 |
| VWC2L     | 0.033124 | 0.453201 | 0.575403 | 515 | 38  |
| ZNF550    | 0.033146 | 0.452905 | 0.575111 | 515 | 515 |
| PCDHGB6   | 0.033179 | 0.452456 | 0.574713 | 515 | 515 |
| CTNBL1    | 0.033184 | 0.452383 | 0.574657 | 515 | 515 |
| KIAA0317  | 0.033189 | 0.452317 | 0.57461  | 515 | 515 |
| SCN5A     | 0.033191 | 0.452289 | 0.57461  | 515 | 492 |
| PWWP2A    | 0.033198 | 0.452198 | 0.574532 | 515 | 515 |
| HDHD1A    | 0.033203 | 0.452134 | 0.574487 | 515 | 514 |
| RASGEF1A  | 0.03322  | 0.451899 | 0.57424  | 515 | 515 |
| TMEM128   | 0.033229 | 0.451769 | 0.574132 | 515 | 515 |
| METTL11B  | 0.033238 | 0.451657 | 0.574026 | 515 | 235 |
| REEP3     | 0.033267 | 0.451251 | 0.57362  | 515 | 515 |
| SPIN4     | 0.033272 | 0.451184 | 0.573598 | 515 | 515 |
| CCDC144B  | 0.033307 | 0.450717 | 0.573124 | 515 | 509 |
| CLU1      | 0.033308 | 0.450698 | 0.573124 | 515 | 316 |
| C12orf68  | 0.033315 | 0.450597 | 0.573044 | 515 | 515 |
| KIAA1683  | 0.03332  | 0.450537 | 0.573005 | 515 | 515 |
| BZW1      | 0.033324 | 0.450486 | 0.573    | 515 | 515 |
| SLC43A1   | 0.033329 | 0.450414 | 0.573    | 515 | 515 |
| OR51Q1    | 0.033351 | 0.450114 | 0.572757 | 515 | 62  |
| MAP4K4    | 0.033374 | 0.449799 | 0.57243  | 515 | 515 |
| RNF216    | 0.033381 | 0.449701 | 0.572341 | 515 | 515 |
| AIM1L     | 0.033389 | 0.449601 | 0.572251 | 515 | 514 |
| PLEKHG3   | 0.033417 | 0.449215 | 0.571833 | 515 | 515 |
| ORC5L     | 0.033426 | 0.449089 | 0.571709 | 515 | 515 |

|           |          |          |          |     |     |
|-----------|----------|----------|----------|-----|-----|
| MST4      | 0.033432 | 0.449011 | 0.571645 | 515 | 515 |
| MTBP      | 0.033433 | 0.449001 | 0.571645 | 515 | 515 |
| TTF1      | 0.033433 | 0.448993 | 0.571645 | 515 | 515 |
| OR6C76    | 0.033435 | 0.448975 | 0.571645 | 515 | 4   |
| KRT20     | 0.033476 | 0.448413 | 0.571103 | 515 | 277 |
| DTX4      | 0.03348  | 0.448368 | 0.571082 | 515 | 515 |
| LOC285375 | 0.033492 | 0.448196 | 0.570935 | 515 | 37  |
| AASS      | 0.033504 | 0.448031 | 0.570834 | 515 | 515 |
| PFKP      | 0.03351  | 0.447956 | 0.570794 | 515 | 515 |
| FUT9      | 0.033554 | 0.447364 | 0.570203 | 515 | 414 |
| OR9G9     | 0.033557 | 0.447324 | 0.570188 | 515 | 6   |
| DDX3X     | 0.033562 | 0.447251 | 0.570188 | 515 | 515 |
| ZZEF1     | 0.033575 | 0.44707  | 0.570009 | 515 | 515 |
| RAD54L    | 0.033578 | 0.447039 | 0.570006 | 515 | 515 |
| ANKRD53   | 0.03358  | 0.447006 | 0.57     | 515 | 514 |
| ZNF595    | 0.033608 | 0.446629 | 0.569592 | 515 | 515 |
| AVPR1A    | 0.03364  | 0.446201 | 0.56912  | 515 | 503 |
| SPRR2B    | 0.03366  | 0.44593  | 0.568991 | 515 | 43  |
| C11orf64  | 0.033664 | 0.44587  | 0.568951 | 515 | 4   |
| TMEM132D  | 0.033689 | 0.445528 | 0.568552 | 515 | 452 |
| FAM178B   | 0.033698 | 0.445411 | 0.568475 | 515 | 508 |
| NDUFS7    | 0.033703 | 0.445341 | 0.568422 | 515 | 515 |
| SULT1A1   | 0.033708 | 0.445279 | 0.568378 | 515 | 515 |
| ABCC6P2   | 0.033725 | 0.445047 | 0.568118 | 515 | 514 |
| LOC284661 | 0.033731 | 0.444962 | 0.568047 | 515 | 19  |
| CCDC102A  | 0.033746 | 0.444756 | 0.567892 | 515 | 515 |
| TBC1D9B   | 0.033783 | 0.444267 | 0.567426 | 515 | 515 |
| ZNF182    | 0.033794 | 0.444113 | 0.567288 | 515 | 515 |
| TUSC1     | 0.033831 | 0.443613 | 0.566687 | 515 | 515 |
| CETN3     | 0.033871 | 0.443081 | 0.566143 | 515 | 515 |
| ISM2      | 0.033895 | 0.442755 | 0.565771 | 515 | 375 |
| GJC1      | 0.033914 | 0.442492 | 0.565471 | 515 | 515 |
| VTI1B     | 0.033946 | 0.442071 | 0.564969 | 515 | 515 |
| TMPRSS9   | 0.033958 | 0.441903 | 0.56479  | 515 | 466 |
| CAPN14    | 0.033964 | 0.44182  | 0.564756 | 515 | 502 |
| BAGE2     | 0.033986 | 0.441529 | 0.564421 | 515 | 468 |
| TAF3      | 0.034032 | 0.440905 | 0.563845 | 515 | 515 |
| DRP2      | 0.034043 | 0.440767 | 0.563735 | 515 | 505 |
| PARP6     | 0.034081 | 0.440252 | 0.563184 | 515 | 515 |
| DMRT3     | 0.034085 | 0.440197 | 0.56315  | 515 | 397 |
| LRP2      | 0.034098 | 0.440026 | 0.563004 | 515 | 507 |
| ACAD8     | 0.034128 | 0.439628 | 0.562608 | 515 | 515 |
| TTYH3     | 0.034129 | 0.439615 | 0.562608 | 515 | 515 |
| ZNF229    | 0.034131 | 0.439578 | 0.562608 | 515 | 514 |
| CTRB1     | 0.034132 | 0.439564 | 0.562608 | 515 | 49  |
| EFS       | 0.034144 | 0.439409 | 0.562538 | 515 | 515 |
| LST-3TM12 | 0.034233 | 0.438222 | 0.561198 | 515 | 209 |
| C3orf21   | 0.03424  | 0.438127 | 0.561112 | 515 | 515 |
| TRNP1     | 0.034259 | 0.437862 | 0.56081  | 515 | 515 |
| PHKG1     | 0.034262 | 0.437825 | 0.560797 | 515 | 500 |
| CACNG2    | 0.03427  | 0.437725 | 0.560705 | 515 | 40  |
| C2orf83   | 0.03427  | 0.437718 | 0.560705 | 515 | 92  |
| MRPL44    | 0.034278 | 0.437607 | 0.560626 | 515 | 515 |
| PKD2L2    | 0.034286 | 0.437509 | 0.560536 | 515 | 347 |

|           |          |          |          |     |     |
|-----------|----------|----------|----------|-----|-----|
| DDX4      | 0.034292 | 0.437423 | 0.560463 | 515 | 279 |
| ADAM11    | 0.034297 | 0.437357 | 0.56045  | 515 | 507 |
| GPSM2     | 0.034314 | 0.437126 | 0.560225 | 515 | 515 |
| 10-Mar    | 0.034358 | 0.436538 | 0.559615 | 515 | 495 |
| MNS1      | 0.034363 | 0.436472 | 0.559566 | 515 | 515 |
| SEPT3     | 0.034385 | 0.436187 | 0.559309 | 515 | 515 |
| UQCR11    | 0.034525 | 0.43432  | 0.557344 | 515 | 515 |
| LAMB3     | 0.034527 | 0.43429  | 0.557342 | 515 | 515 |
| HECW2     | 0.034527 | 0.434286 | 0.557342 | 515 | 515 |
| NXN       | 0.034533 | 0.434207 | 0.557337 | 515 | 515 |
| RGS21     | 0.03454  | 0.434114 | 0.557258 | 515 | 23  |
| C10orf96  | 0.034573 | 0.433672 | 0.556763 | 515 | 4   |
| CNTN4     | 0.034625 | 0.432986 | 0.556096 | 515 | 515 |
| ZNF536    | 0.034638 | 0.432811 | 0.555908 | 515 | 316 |
| SNORA55   | 0.03464  | 0.432791 | 0.555908 | 515 | 24  |
| OR5H6     | 0.034653 | 0.432614 | 0.555725 | 515 | 30  |
| RPL32     | 0.034657 | 0.432557 | 0.555687 | 515 | 515 |
| FLJ46321  | 0.034659 | 0.432533 | 0.555687 | 515 | 49  |
| VN1R2     | 0.034668 | 0.43242  | 0.555584 | 515 | 38  |
| SNORA48   | 0.034688 | 0.432154 | 0.555313 | 515 | 209 |
| CHODL     | 0.034689 | 0.432141 | 0.555313 | 515 | 510 |
| LOC126536 | 0.034704 | 0.431942 | 0.555154 | 515 | 42  |
| SMNDC1    | 0.03474  | 0.431461 | 0.554708 | 515 | 515 |
| CNTN1     | 0.03475  | 0.43133  | 0.554575 | 515 | 504 |
| RMND1     | 0.034813 | 0.430496 | 0.553752 | 515 | 515 |
| OSR2      | 0.034825 | 0.430338 | 0.553584 | 515 | 515 |
| METTL6    | 0.034858 | 0.42989  | 0.55308  | 515 | 515 |
| MCFD2     | 0.034882 | 0.429579 | 0.552928 | 515 | 515 |
| LEPREL1   | 0.034891 | 0.429452 | 0.552836 | 515 | 515 |
| OR10H5    | 0.034903 | 0.429304 | 0.55269  | 515 | 121 |
| KRTAP12-2 | 0.034909 | 0.429219 | 0.552679 | 515 | 14  |
| C5orf34   | 0.034929 | 0.428961 | 0.552417 | 515 | 515 |
| TNK2      | 0.034954 | 0.428619 | 0.552084 | 515 | 515 |
| DDX39     | 0.034963 | 0.428499 | 0.552001 | 515 | 515 |
| CDH19     | 0.034976 | 0.428331 | 0.551819 | 515 | 410 |
| APOBEC2   | 0.034993 | 0.428108 | 0.551603 | 515 | 502 |
| EEF1B2    | 0.035018 | 0.427775 | 0.551245 | 515 | 515 |
| LRRC8D    | 0.035042 | 0.427461 | 0.550983 | 515 | 515 |
| BDNFOS    | 0.035153 | 0.425996 | 0.549236 | 515 | 515 |
| C2orf81   | 0.0352   | 0.42538  | 0.548478 | 515 | 515 |
| ARGFXP2   | 0.0352   | 0.425374 | 0.548478 | 515 | 430 |
| WNT16     | 0.035224 | 0.425062 | 0.548209 | 515 | 488 |
| ZNF32     | 0.035226 | 0.425042 | 0.548209 | 515 | 515 |
| GJC2      | 0.035228 | 0.425008 | 0.548209 | 515 | 514 |
| CLVS1     | 0.035236 | 0.424901 | 0.548142 | 515 | 490 |
| LMO4      | 0.035266 | 0.424509 | 0.5479   | 515 | 515 |
| FTLP10    | 0.035334 | 0.42362  | 0.546948 | 515 | 5   |
| LOC121838 | 0.03536  | 0.423278 | 0.546577 | 515 | 357 |
| MGAT5B    | 0.035379 | 0.423032 | 0.546296 | 515 | 512 |
| FAM116B   | 0.03538  | 0.423021 | 0.546296 | 515 | 515 |
| TRAPPC6B  | 0.035399 | 0.422761 | 0.546094 | 515 | 515 |
| C12orf26  | 0.035407 | 0.422666 | 0.546071 | 515 | 515 |
| DUSP5P    | 0.035442 | 0.422202 | 0.545577 | 515 | 478 |
| PRSS3     | 0.035454 | 0.42204  | 0.545402 | 515 | 502 |

|           |          |          |          |     |     |
|-----------|----------|----------|----------|-----|-----|
| TMEM2     | 0.035462 | 0.421945 | 0.545314 | 515 | 515 |
| RAD51     | 0.035467 | 0.421878 | 0.545299 | 515 | 515 |
| NR1D1     | 0.035488 | 0.421605 | 0.545017 | 515 | 515 |
| GPR158    | 0.035534 | 0.421005 | 0.544386 | 515 | 475 |
| FAM99A    | 0.035535 | 0.420987 | 0.544386 | 515 | 15  |
| FAM187B   | 0.0356   | 0.420137 | 0.54354  | 515 | 211 |
| LHX2      | 0.035609 | 0.420023 | 0.543428 | 515 | 447 |
| WIF1      | 0.035618 | 0.419899 | 0.54336  | 515 | 502 |
| SLC27A3   | 0.035621 | 0.419862 | 0.54336  | 515 | 515 |
| ZC3H8     | 0.035701 | 0.418823 | 0.542262 | 515 | 515 |
| OR4D5     | 0.03573  | 0.418444 | 0.541841 | 515 | 6   |
| GABARAPL2 | 0.035734 | 0.418386 | 0.541826 | 515 | 515 |
| C15orf54  | 0.035767 | 0.417958 | 0.541351 | 515 | 461 |
| IKZF5     | 0.035777 | 0.417834 | 0.541261 | 515 | 515 |
| DAPL1     | 0.035786 | 0.417707 | 0.541133 | 515 | 412 |
| ITGB3BP   | 0.035796 | 0.417583 | 0.541007 | 515 | 515 |
| LRRC39    | 0.035797 | 0.417573 | 0.541007 | 515 | 505 |
| TACC3     | 0.035797 | 0.417562 | 0.541007 | 515 | 515 |
| LOC390595 | 0.035811 | 0.417387 | 0.540857 | 515 | 503 |
| RSPH3     | 0.035817 | 0.417304 | 0.540785 | 515 | 515 |
| GPM6B     | 0.035823 | 0.417233 | 0.540729 | 515 | 515 |
| C20orf195 | 0.035829 | 0.41715  | 0.540656 | 515 | 496 |
| OR4F29    | 0.035842 | 0.416982 | 0.540474 | 515 | 242 |
| MUM1L1    | 0.035855 | 0.416819 | 0.540296 | 515 | 491 |
| ADAM20    | 0.035856 | 0.416802 | 0.540296 | 515 | 411 |
| EFTUD2    | 0.035863 | 0.416708 | 0.540223 | 515 | 515 |
| EXOC1     | 0.035874 | 0.416568 | 0.540107 | 515 | 515 |
| NIP7      | 0.035893 | 0.416315 | 0.53988  | 515 | 515 |
| SCAI      | 0.035917 | 0.416008 | 0.539595 | 515 | 515 |
| CYP2C19   | 0.035935 | 0.415776 | 0.539329 | 515 | 324 |
| ZNF876P   | 0.035938 | 0.415734 | 0.539329 | 515 | 515 |
| PADI1     | 0.03594  | 0.415709 | 0.539329 | 515 | 450 |
| SOS2      | 0.035969 | 0.415337 | 0.5389   | 515 | 515 |
| ANKRD20B  | 0.035993 | 0.415025 | 0.538565 | 515 | 488 |
| HSPB7     | 0.036011 | 0.414789 | 0.538364 | 515 | 515 |
| CNBD1     | 0.036033 | 0.414499 | 0.538092 | 515 | 36  |
| OR4D10    | 0.036059 | 0.414168 | 0.537732 | 515 | 29  |
| IKZF4     | 0.036067 | 0.414055 | 0.537656 | 515 | 515 |
| ZNF418    | 0.036077 | 0.413929 | 0.537527 | 515 | 515 |
| ZNF140    | 0.0361   | 0.413638 | 0.537184 | 515 | 515 |
| SPTY2D1   | 0.036105 | 0.413573 | 0.537134 | 515 | 515 |
| OR4C3     | 0.036124 | 0.413327 | 0.536919 | 515 | 8   |
| CAMK2N2   | 0.036156 | 0.412903 | 0.536544 | 515 | 513 |
| LDLR      | 0.036167 | 0.41277  | 0.536405 | 515 | 515 |
| MGC3771   | 0.036168 | 0.412757 | 0.536405 | 515 | 515 |
| LOC646982 | 0.036183 | 0.412562 | 0.536239 | 515 | 381 |
| MPPED1    | 0.03619  | 0.412473 | 0.536159 | 515 | 203 |
| LOC283392 | 0.036196 | 0.412395 | 0.536126 | 515 | 337 |
| OR51T1    | 0.036226 | 0.412001 | 0.535719 | 515 | 11  |
| DNAH7     | 0.036233 | 0.411921 | 0.53565  | 515 | 513 |
| RBM33     | 0.036233 | 0.411919 | 0.53565  | 515 | 515 |
| AR        | 0.036254 | 0.411645 | 0.5354   | 515 | 504 |
| KRT75     | 0.036263 | 0.411529 | 0.535356 | 515 | 258 |
| FOXR1     | 0.036275 | 0.411376 | 0.535324 | 515 | 58  |

|           |          |          |          |     |     |
|-----------|----------|----------|----------|-----|-----|
| MCM10     | 0.036307 | 0.410958 | 0.53485  | 515 | 515 |
| GK2       | 0.036335 | 0.410597 | 0.534563 | 515 | 14  |
| RPSAP58   | 0.036357 | 0.410318 | 0.534295 | 515 | 515 |
| SIDT2     | 0.036367 | 0.410189 | 0.534162 | 515 | 515 |
| SQSTM1    | 0.036409 | 0.409644 | 0.533592 | 515 | 515 |
| AFAP1     | 0.03646  | 0.408996 | 0.53299  | 515 | 515 |
| RTP2      | 0.03646  | 0.40899  | 0.53299  | 515 | 104 |
| ZC3H15    | 0.036475 | 0.408791 | 0.532862 | 515 | 515 |
| UBQLN3    | 0.036478 | 0.408757 | 0.532853 | 515 | 33  |
| SPOCK1    | 0.03649  | 0.408603 | 0.532741 | 515 | 515 |
| KCNS1     | 0.036505 | 0.408412 | 0.532577 | 515 | 494 |
| TAS2R8    | 0.036514 | 0.4083   | 0.5325   | 515 | 55  |
| ORC6L     | 0.036566 | 0.407625 | 0.531725 | 515 | 515 |
| RFT1      | 0.036595 | 0.407252 | 0.531385 | 515 | 515 |
| ETNK1     | 0.036611 | 0.407054 | 0.531222 | 515 | 515 |
| GPR156    | 0.036648 | 0.406581 | 0.530778 | 515 | 482 |
| MDM2      | 0.03665  | 0.406556 | 0.530778 | 515 | 515 |
| IHH       | 0.036661 | 0.406414 | 0.530664 | 515 | 479 |
| C10orf110 | 0.036663 | 0.406387 | 0.530663 | 515 | 514 |
| PRPF39    | 0.036676 | 0.406219 | 0.530478 | 515 | 515 |
| C3orf10   | 0.036678 | 0.406188 | 0.530472 | 515 | 515 |
| NEAT1     | 0.036699 | 0.405921 | 0.530158 | 515 | 515 |
| SPINK14   | 0.036719 | 0.405673 | 0.52987  | 515 | 33  |
| LOC283761 | 0.036734 | 0.405482 | 0.529689 | 515 | 100 |
| CACNG4    | 0.036793 | 0.404722 | 0.528903 | 515 | 513 |
| MKX       | 0.036802 | 0.40461  | 0.528826 | 515 | 512 |
| SNORD17   | 0.03683  | 0.404252 | 0.528462 | 515 | 446 |
| XKR7      | 0.03685  | 0.403992 | 0.528192 | 515 | 146 |
| SNORA2A   | 0.03686  | 0.403863 | 0.528091 | 515 | 39  |
| SNORA61   | 0.036887 | 0.403523 | 0.527688 | 515 | 153 |
| TMEM167B  | 0.036913 | 0.403187 | 0.527416 | 515 | 515 |
| PHYHIPL   | 0.036915 | 0.403169 | 0.527416 | 515 | 478 |
| HSF2      | 0.03693  | 0.402972 | 0.527203 | 515 | 515 |
| SNORA67   | 0.036939 | 0.402857 | 0.527121 | 515 | 308 |
| CPA1      | 0.03694  | 0.402849 | 0.527121 | 515 | 208 |
| CFL1      | 0.037023 | 0.401788 | 0.525861 | 515 | 515 |
| RPS28     | 0.037079 | 0.401081 | 0.525142 | 515 | 513 |
| ARR3      | 0.037098 | 0.400831 | 0.524917 | 515 | 110 |
| PLP2      | 0.037105 | 0.400746 | 0.52484  | 515 | 515 |
| C21orf94  | 0.03712  | 0.400554 | 0.524657 | 515 | 22  |
| LOC642929 | 0.037141 | 0.400292 | 0.524384 | 515 | 9   |
| CCDC110   | 0.037154 | 0.400128 | 0.524272 | 515 | 515 |
| TTLL13    | 0.037184 | 0.39974  | 0.523831 | 515 | 513 |
| HELT      | 0.037185 | 0.399727 | 0.523831 | 515 | 144 |
| C11orf90  | 0.037248 | 0.398931 | 0.522874 | 515 | 352 |
| PSD2      | 0.037251 | 0.398892 | 0.522857 | 515 | 468 |
| GSC2      | 0.037276 | 0.398579 | 0.522482 | 515 | 4   |
| IGFBP5    | 0.03728  | 0.398521 | 0.522439 | 515 | 515 |
| IGFL3     | 0.037285 | 0.398467 | 0.522403 | 515 | 163 |
| ZNF275    | 0.037292 | 0.398371 | 0.522346 | 515 | 515 |
| ARSK      | 0.037296 | 0.398325 | 0.522319 | 515 | 515 |
| RSPH9     | 0.037305 | 0.398214 | 0.522242 | 515 | 515 |
| LRRC3B    | 0.037315 | 0.398084 | 0.522107 | 515 | 302 |
| SMPD3     | 0.037332 | 0.397873 | 0.521882 | 515 | 515 |

|           |          |          |          |     |     |
|-----------|----------|----------|----------|-----|-----|
| RAX       | 0.037341 | 0.39776  | 0.521785 | 515 | 195 |
| FBX03     | 0.037352 | 0.397614 | 0.521627 | 515 | 515 |
| KIAA0754  | 0.037361 | 0.397503 | 0.521515 | 515 | 515 |
| SFRS13B   | 0.037411 | 0.396868 | 0.520717 | 515 | 515 |
| OR2H2     | 0.03744  | 0.3965   | 0.520336 | 515 | 200 |
| CUTC      | 0.037507 | 0.395658 | 0.519334 | 515 | 515 |
| RPS27A    | 0.037522 | 0.395465 | 0.519148 | 515 | 515 |
| LOC389033 | 0.037528 | 0.395393 | 0.519088 | 515 | 110 |
| ALDH16A1  | 0.037534 | 0.395315 | 0.519024 | 515 | 515 |
| CDC14C    | 0.037537 | 0.395278 | 0.519024 | 515 | 510 |
| HELZ      | 0.037565 | 0.394925 | 0.518644 | 515 | 515 |
| UNC5CL    | 0.037574 | 0.394819 | 0.518538 | 515 | 515 |
| SDHB      | 0.037574 | 0.394811 | 0.518538 | 515 | 515 |
| MTF2      | 0.037576 | 0.394789 | 0.518538 | 515 | 515 |
| CSNK1A1   | 0.037577 | 0.394776 | 0.518538 | 515 | 515 |
| CNPY1     | 0.037602 | 0.394464 | 0.518243 | 515 | 144 |
| PHLDA3    | 0.037628 | 0.394135 | 0.517878 | 515 | 515 |
| SLC16A9   | 0.037645 | 0.393921 | 0.517631 | 515 | 515 |
| OR9Q1     | 0.037655 | 0.393797 | 0.517537 | 515 | 14  |
| FAM170A   | 0.037686 | 0.393412 | 0.517166 | 515 | 193 |
| HULC      | 0.037703 | 0.393186 | 0.516938 | 515 | 221 |
| C7orf10   | 0.037725 | 0.392916 | 0.516651 | 515 | 515 |
| CTDSPL    | 0.037756 | 0.392528 | 0.516242 | 515 | 515 |
| CCDC159   | 0.03776  | 0.39248  | 0.516213 | 515 | 515 |
| ABCC13    | 0.037762 | 0.392449 | 0.516207 | 515 | 367 |
| KDELC2    | 0.037764 | 0.392422 | 0.516204 | 515 | 515 |
| MYO1E     | 0.037775 | 0.392295 | 0.516102 | 515 | 515 |
| TYW3      | 0.037781 | 0.392213 | 0.516032 | 515 | 515 |
| ZNF204P   | 0.037782 | 0.392203 | 0.516032 | 515 | 515 |
| PRMT2     | 0.037791 | 0.392094 | 0.515977 | 515 | 515 |
| OR10A5    | 0.037817 | 0.391763 | 0.515575 | 515 | 16  |
| C21orf128 | 0.037819 | 0.391732 | 0.515568 | 515 | 448 |
| NCRNA0015 | 0.03784  | 0.391472 | 0.515295 | 515 | 19  |
| MRPL11    | 0.037851 | 0.391341 | 0.515155 | 515 | 515 |
| ARL5C     | 0.037927 | 0.390391 | 0.513972 | 515 | 154 |
| FKSG83    | 0.037935 | 0.390285 | 0.513901 | 515 | 29  |
| PYGL      | 0.037952 | 0.390068 | 0.513751 | 515 | 515 |
| FAM72D    | 0.037956 | 0.390019 | 0.51372  | 515 | 515 |
| OLFM2     | 0.037988 | 0.389624 | 0.513267 | 515 | 515 |
| MIMT1     | 0.038012 | 0.389318 | 0.512932 | 515 | 103 |
| RNLS      | 0.038022 | 0.389196 | 0.512838 | 515 | 515 |
| RPL18A    | 0.038031 | 0.38909  | 0.512733 | 515 | 515 |
| SNIP1     | 0.038031 | 0.389081 | 0.512733 | 515 | 515 |
| OR52A5    | 0.038039 | 0.388992 | 0.512671 | 515 | 6   |
| SFRS3     | 0.038066 | 0.388654 | 0.512259 | 515 | 515 |
| STARD6    | 0.038088 | 0.388377 | 0.511928 | 515 | 66  |
| SLC25A26  | 0.038114 | 0.388054 | 0.511604 | 515 | 515 |
| LOC162632 | 0.038116 | 0.388021 | 0.511604 | 515 | 515 |
| OR13C3    | 0.038143 | 0.387686 | 0.511253 | 515 | 12  |
| MSX1      | 0.038147 | 0.387636 | 0.511222 | 515 | 514 |
| ZNF776    | 0.038168 | 0.387381 | 0.510952 | 515 | 515 |
| COX6A2    | 0.038187 | 0.387137 | 0.510664 | 515 | 140 |
| DTWD1     | 0.038192 | 0.387078 | 0.510634 | 515 | 515 |
| NR5A1     | 0.038263 | 0.386203 | 0.509769 | 515 | 347 |

|           |          |          |          |     |     |
|-----------|----------|----------|----------|-----|-----|
| CLCN7     | 0.038263 | 0.386193 | 0.509769 | 515 | 515 |
| ESYT3     | 0.038272 | 0.386081 | 0.509743 | 515 | 515 |
| PRODH2    | 0.038274 | 0.386067 | 0.509743 | 515 | 42  |
| OR6B2     | 0.038275 | 0.386053 | 0.509743 | 515 | 57  |
| SNN       | 0.038286 | 0.385914 | 0.509623 | 515 | 515 |
| ABCA13    | 0.038308 | 0.385645 | 0.509301 | 515 | 513 |
| FAM138E   | 0.038312 | 0.385588 | 0.509259 | 515 | 44  |
| PEG10     | 0.038321 | 0.385481 | 0.509152 | 515 | 515 |
| LOC100127 | 0.038336 | 0.385293 | 0.508971 | 515 | 460 |
| PXDNL     | 0.038367 | 0.384906 | 0.50856  | 515 | 509 |
| PLEK2     | 0.038384 | 0.384696 | 0.508316 | 515 | 515 |
| PDPR      | 0.038387 | 0.384661 | 0.508316 | 515 | 515 |
| FSHR      | 0.0384   | 0.384504 | 0.508164 | 515 | 71  |
| CDC25C    | 0.0384   | 0.384496 | 0.508164 | 515 | 515 |
| ACSM2A    | 0.038402 | 0.384477 | 0.508164 | 515 | 123 |
| ITGB1BP3  | 0.038429 | 0.384137 | 0.507847 | 515 | 158 |
| GOT1L1    | 0.038451 | 0.383869 | 0.507559 | 515 | 14  |
| CCDC112   | 0.038456 | 0.383809 | 0.507517 | 515 | 515 |
| MPHOSPH8  | 0.038477 | 0.383539 | 0.507257 | 515 | 515 |
| LRRC37A3  | 0.038497 | 0.383299 | 0.506974 | 515 | 515 |
| IL17B     | 0.0385   | 0.383256 | 0.506974 | 515 | 390 |
| TEKT4     | 0.038579 | 0.382281 | 0.505962 | 515 | 503 |
| KIAA1486  | 0.038582 | 0.382253 | 0.505958 | 515 | 489 |
| SHISA7    | 0.03859  | 0.382152 | 0.505871 | 515 | 338 |
| C15orf33  | 0.038616 | 0.381823 | 0.505523 | 515 | 513 |
| OR10J5    | 0.03864  | 0.38153  | 0.505236 | 515 | 20  |
| LOC647859 | 0.038668 | 0.381187 | 0.504815 | 515 | 346 |
| KRTAP12-4 | 0.038679 | 0.381057 | 0.504675 | 515 | 4   |
| C9orf3    | 0.03869  | 0.380912 | 0.504551 | 515 | 515 |
| CALM2     | 0.038697 | 0.380828 | 0.504472 | 515 | 515 |
| DLEU2L    | 0.038697 | 0.380824 | 0.504472 | 515 | 504 |
| KRT6B     | 0.038719 | 0.380556 | 0.504246 | 515 | 461 |
| SDC4P     | 0.038786 | 0.379734 | 0.503324 | 515 | 67  |
| QSOX2     | 0.038811 | 0.379427 | 0.502984 | 515 | 515 |
| C1orf103  | 0.038819 | 0.37933  | 0.502889 | 515 | 515 |
| GPR126    | 0.038847 | 0.378989 | 0.502536 | 515 | 515 |
| PURG      | 0.038849 | 0.378965 | 0.502536 | 515 | 474 |
| FBXL20    | 0.038853 | 0.378908 | 0.502521 | 515 | 515 |
| RNF11     | 0.038859 | 0.378838 | 0.50247  | 515 | 515 |
| RNF138P1  | 0.038869 | 0.378717 | 0.502375 | 515 | 515 |
| ACCN3     | 0.03888  | 0.378582 | 0.502229 | 515 | 512 |
| WNT5B     | 0.03888  | 0.378581 | 0.502229 | 515 | 515 |
| RPS13     | 0.038892 | 0.378435 | 0.502102 | 515 | 515 |
| IFI27L1   | 0.038938 | 0.377874 | 0.501512 | 515 | 515 |
| RAD17     | 0.039017 | 0.376895 | 0.500357 | 515 | 515 |
| FAM106A   | 0.039061 | 0.376366 | 0.49982  | 515 | 413 |
| DHX8      | 0.039074 | 0.376206 | 0.499641 | 515 | 515 |
| CT45A2    | 0.039089 | 0.376024 | 0.499433 | 515 | 78  |
| PIP       | 0.03912  | 0.375643 | 0.498993 | 515 | 409 |
| BCLAF1    | 0.03913  | 0.37552  | 0.498863 | 515 | 515 |
| RCBTB1    | 0.039132 | 0.375493 | 0.498861 | 515 | 515 |
| TMEM9B    | 0.039136 | 0.375443 | 0.498827 | 515 | 515 |
| ADM       | 0.03914  | 0.3754   | 0.498803 | 515 | 515 |
| TXNDC11   | 0.039213 | 0.374509 | 0.497785 | 515 | 515 |



|           |          |          |          |     |     |
|-----------|----------|----------|----------|-----|-----|
| CDK2      | 0.039219 | 0.374433 | 0.497717 | 515 | 515 |
| HEYL      | 0.03926  | 0.373928 | 0.497144 | 515 | 515 |
| OGFOD1    | 0.039262 | 0.373911 | 0.497144 | 515 | 515 |
| RNF182    | 0.039273 | 0.373778 | 0.497011 | 515 | 512 |
| RTTN      | 0.039283 | 0.373653 | 0.496878 | 515 | 515 |
| C4orf45   | 0.039287 | 0.373608 | 0.496851 | 515 | 58  |
| CIRBP     | 0.039295 | 0.373505 | 0.496748 | 515 | 515 |
| ODF3L2    | 0.039304 | 0.373396 | 0.496635 | 515 | 452 |
| RPTN      | 0.039316 | 0.373254 | 0.49648  | 515 | 153 |
| C2orf58   | 0.03941  | 0.372108 | 0.495185 | 515 | 506 |
| PKD1L1    | 0.039423 | 0.371946 | 0.495037 | 515 | 513 |
| TAL2      | 0.039429 | 0.371877 | 0.49501  | 515 | 350 |
| CHRNA     | 0.039429 | 0.371876 | 0.49501  | 515 | 309 |
| OR14I1    | 0.039431 | 0.37186  | 0.49501  | 515 | 42  |
| OLIG2     | 0.039455 | 0.371562 | 0.494756 | 515 | 268 |
| PDSS1     | 0.039474 | 0.371331 | 0.494514 | 515 | 515 |
| TMEM184C  | 0.039478 | 0.371289 | 0.494492 | 515 | 515 |
| IKBKB     | 0.039488 | 0.371163 | 0.49439  | 515 | 515 |
| LOC144438 | 0.039504 | 0.370966 | 0.494165 | 515 | 515 |
| DHRS4L2   | 0.039518 | 0.370795 | 0.494063 | 515 | 515 |
| ZNF516    | 0.039521 | 0.370767 | 0.494063 | 515 | 515 |
| GOLGA8G   | 0.039527 | 0.370692 | 0.494059 | 515 | 253 |
| VIPAR     | 0.039542 | 0.370506 | 0.493861 | 515 | 515 |
| FERD3L    | 0.039575 | 0.370111 | 0.493481 | 515 | 19  |
| MYBPHL    | 0.03959  | 0.369933 | 0.493342 | 515 | 477 |
| HRK       | 0.039693 | 0.368688 | 0.492011 | 515 | 306 |
| KBTBD2    | 0.0397   | 0.368593 | 0.491993 | 515 | 515 |
| tAKR      | 0.039705 | 0.368543 | 0.491981 | 515 | 90  |
| SYCP3     | 0.039719 | 0.368365 | 0.491809 | 515 | 163 |
| AASDH     | 0.039727 | 0.368276 | 0.491724 | 515 | 515 |
| ATAD2     | 0.03974  | 0.368119 | 0.491546 | 515 | 515 |
| CD164L2   | 0.039773 | 0.367719 | 0.491111 | 515 | 509 |
| TUSC3     | 0.039781 | 0.367619 | 0.491024 | 515 | 515 |
| PDE6A     | 0.039867 | 0.366586 | 0.489925 | 515 | 497 |
| FZD4      | 0.039899 | 0.366201 | 0.489476 | 515 | 515 |
| CA9       | 0.039933 | 0.365798 | 0.48897  | 515 | 504 |
| ARMC1     | 0.039947 | 0.365625 | 0.488806 | 515 | 515 |
| MYL1      | 0.039955 | 0.365529 | 0.488774 | 515 | 12  |
| POU3F2    | 0.03999  | 0.365114 | 0.488317 | 515 | 351 |
| FLJ16779  | 0.040031 | 0.364616 | 0.487716 | 515 | 465 |
| BMP4      | 0.040038 | 0.364537 | 0.487643 | 515 | 515 |
| DLGAP2    | 0.040047 | 0.36442  | 0.487618 | 515 | 457 |
| SNORA74B  | 0.040066 | 0.364201 | 0.487423 | 515 | 134 |
| TAF9      | 0.040109 | 0.363678 | 0.486787 | 515 | 515 |
| LOC100128 | 0.04012  | 0.363553 | 0.486685 | 515 | 394 |
| ATP12A    | 0.040136 | 0.363359 | 0.48649  | 515 | 445 |
| TP53AIP1  | 0.04016  | 0.363076 | 0.486144 | 515 | 433 |
| C22orf13  | 0.040169 | 0.36297  | 0.486034 | 515 | 515 |
| HOXB6     | 0.040183 | 0.3628   | 0.485872 | 515 | 515 |
| UBXN6     | 0.04019  | 0.362718 | 0.485827 | 515 | 515 |
| PLA2G4D   | 0.040212 | 0.362447 | 0.48553  | 515 | 506 |
| ATP8A2    | 0.040217 | 0.362395 | 0.485492 | 515 | 512 |
| FBX038    | 0.040246 | 0.36204  | 0.485147 | 515 | 515 |
| HIST1H1D  | 0.040276 | 0.361683 | 0.484766 | 515 | 444 |

|           |          |          |          |     |     |
|-----------|----------|----------|----------|-----|-----|
| TIA1      | 0.040292 | 0.361498 | 0.484551 | 515 | 515 |
| ATP7A     | 0.040296 | 0.361442 | 0.484526 | 515 | 515 |
| WDR1      | 0.0403   | 0.361397 | 0.484512 | 515 | 515 |
| SLC33A1   | 0.040303 | 0.36136  | 0.484496 | 515 | 515 |
| S100A7A   | 0.040324 | 0.361111 | 0.484226 | 515 | 134 |
| NUSAP1    | 0.04034  | 0.360922 | 0.484025 | 515 | 515 |
| FBXW2     | 0.04035  | 0.360802 | 0.483958 | 515 | 515 |
| SPINK6    | 0.040378 | 0.360475 | 0.483601 | 515 | 257 |
| MOCS1     | 0.04039  | 0.360326 | 0.483456 | 515 | 515 |
| EDDM3B    | 0.040399 | 0.360215 | 0.483382 | 515 | 115 |
| TPPP2     | 0.040477 | 0.359287 | 0.482267 | 515 | 48  |
| RPP14     | 0.040481 | 0.359251 | 0.482251 | 515 | 515 |
| NBPF16    | 0.04056  | 0.358312 | 0.48112  | 515 | 515 |
| LMBR1     | 0.040603 | 0.357795 | 0.480544 | 515 | 515 |
| UBL5      | 0.040631 | 0.357468 | 0.480277 | 515 | 515 |
| EXOC6B    | 0.040642 | 0.357336 | 0.480164 | 515 | 515 |
| STAG3L4   | 0.040665 | 0.357069 | 0.479837 | 515 | 515 |
| SUSD2     | 0.040677 | 0.356917 | 0.479666 | 515 | 515 |
| PRLR      | 0.040698 | 0.356674 | 0.479403 | 515 | 514 |
| MYL12B    | 0.040715 | 0.356472 | 0.479163 | 515 | 515 |
| ZMIZ2     | 0.040725 | 0.356351 | 0.479034 | 515 | 515 |
| RNF115    | 0.040733 | 0.356254 | 0.478975 | 515 | 515 |
| OR1L6     | 0.040767 | 0.355855 | 0.478495 | 515 | 22  |
| LOC441601 | 0.040776 | 0.355757 | 0.478395 | 515 | 265 |
| RESP18    | 0.040777 | 0.355743 | 0.478395 | 515 | 9   |
| LPP       | 0.040794 | 0.355533 | 0.478191 | 515 | 515 |
| DNAJA2    | 0.040801 | 0.355455 | 0.478117 | 515 | 515 |
| CCDC62    | 0.040813 | 0.355319 | 0.477999 | 515 | 508 |
| TAF9B     | 0.040819 | 0.355248 | 0.477936 | 515 | 515 |
| RAB21     | 0.040826 | 0.35516  | 0.477849 | 515 | 515 |
| C16orf68  | 0.040847 | 0.354919 | 0.477558 | 515 | 515 |
| ZNF717    | 0.040875 | 0.354581 | 0.477167 | 515 | 515 |
| TSPYL5    | 0.040931 | 0.35393  | 0.47642  | 515 | 515 |
| ZNF350    | 0.040945 | 0.353765 | 0.476229 | 515 | 515 |
| KIF4A     | 0.040956 | 0.353625 | 0.476074 | 515 | 515 |
| C17orf65  | 0.040978 | 0.353369 | 0.475824 | 515 | 515 |
| OR5E1P    | 0.040979 | 0.353357 | 0.475824 | 515 | 60  |
| UGP2      | 0.040989 | 0.353239 | 0.475719 | 515 | 515 |
| CENPL     | 0.041028 | 0.352788 | 0.475202 | 515 | 515 |
| BEGAIN    | 0.041078 | 0.352203 | 0.474446 | 515 | 513 |
| PCDH11Y   | 0.041088 | 0.35208  | 0.474312 | 515 | 147 |
| SLC9A3    | 0.041145 | 0.351414 | 0.473542 | 515 | 461 |
| DMRTA1    | 0.04115  | 0.351348 | 0.473515 | 515 | 507 |
| KIAA1012  | 0.041153 | 0.351316 | 0.473507 | 515 | 515 |
| MED22     | 0.041161 | 0.35122  | 0.473441 | 515 | 515 |
| FADS6     | 0.041167 | 0.351157 | 0.473388 | 515 | 336 |
| MAPRE1    | 0.041173 | 0.351085 | 0.473323 | 515 | 515 |
| FLJ11235  | 0.041175 | 0.351064 | 0.473323 | 515 | 514 |
| LCAT      | 0.041177 | 0.351034 | 0.473318 | 515 | 515 |
| CLEC3A    | 0.041178 | 0.351029 | 0.473318 | 515 | 127 |
| FAM86D    | 0.041197 | 0.350799 | 0.473097 | 515 | 515 |
| MACC1     | 0.041199 | 0.350779 | 0.473097 | 515 | 515 |
| NUP205    | 0.04123  | 0.350418 | 0.472774 | 515 | 515 |
| SERINC5   | 0.041236 | 0.350348 | 0.472713 | 515 | 515 |

|           |          |          |          |     |     |
|-----------|----------|----------|----------|-----|-----|
| HAUS5     | 0.041269 | 0.34996  | 0.472316 | 515 | 515 |
| DNAH3     | 0.041269 | 0.349956 | 0.472316 | 515 | 514 |
| NLGN4X    | 0.041284 | 0.349791 | 0.472165 | 515 | 514 |
| POMP      | 0.041286 | 0.349762 | 0.472165 | 515 | 515 |
| PARVA     | 0.04131  | 0.349483 | 0.471831 | 515 | 515 |
| C14orf138 | 0.041333 | 0.349211 | 0.471496 | 515 | 515 |
| FAM91A1   | 0.041334 | 0.349199 | 0.471496 | 515 | 515 |
| ZNF324    | 0.041337 | 0.349166 | 0.471496 | 515 | 515 |
| OR2L2     | 0.041349 | 0.349026 | 0.471406 | 515 | 28  |
| DAAM1     | 0.041354 | 0.348966 | 0.471357 | 515 | 515 |
| GTSE1     | 0.041379 | 0.348682 | 0.471005 | 515 | 515 |
| PCDHB16   | 0.041399 | 0.348441 | 0.470743 | 515 | 515 |
| LOC100189 | 0.04145  | 0.347854 | 0.470044 | 515 | 295 |
| MRPL32    | 0.041453 | 0.347819 | 0.470029 | 515 | 515 |
| PIK3C2B   | 0.041503 | 0.347229 | 0.469327 | 515 | 515 |
| ARL4A     | 0.041512 | 0.34713  | 0.469226 | 515 | 515 |
| LOC338799 | 0.041546 | 0.346739 | 0.46876  | 515 | 515 |
| LPCAT1    | 0.041552 | 0.346665 | 0.468724 | 515 | 515 |
| SCEL      | 0.041555 | 0.346627 | 0.468717 | 515 | 514 |
| CHD5      | 0.04156  | 0.346567 | 0.468717 | 515 | 439 |
| PNLIP     | 0.041563 | 0.34654  | 0.468714 | 515 | 34  |
| LAMC3     | 0.041581 | 0.346333 | 0.468496 | 515 | 515 |
| TTC23     | 0.041583 | 0.346309 | 0.468495 | 515 | 515 |
| MLF1      | 0.041586 | 0.346274 | 0.46848  | 515 | 515 |
| ZNF415    | 0.041609 | 0.346    | 0.468141 | 515 | 515 |
| LY6D      | 0.041629 | 0.345771 | 0.467895 | 515 | 468 |
| HIST2H2BF | 0.04164  | 0.345637 | 0.467745 | 515 | 515 |
| MSH4      | 0.041665 | 0.345354 | 0.467394 | 515 | 377 |
| RNF7      | 0.041666 | 0.345346 | 0.467394 | 515 | 515 |
| HTA       | 0.041672 | 0.345273 | 0.467348 | 515 | 124 |
| OR52B4    | 0.041681 | 0.345162 | 0.467292 | 515 | 14  |
| HIP1      | 0.041697 | 0.34498  | 0.467078 | 515 | 515 |
| ZMAT2     | 0.041713 | 0.344793 | 0.466919 | 515 | 515 |
| SVIL      | 0.041744 | 0.344442 | 0.466507 | 515 | 515 |
| SNX15     | 0.041765 | 0.344196 | 0.466269 | 515 | 515 |
| TMEM117   | 0.041766 | 0.344185 | 0.466269 | 515 | 515 |
| CENPH     | 0.041781 | 0.344014 | 0.466086 | 515 | 515 |
| FLJ37201  | 0.041782 | 0.344001 | 0.466086 | 515 | 512 |
| SLC1A2    | 0.041785 | 0.343968 | 0.466086 | 515 | 515 |
| ZNF454    | 0.041811 | 0.34366  | 0.465795 | 515 | 509 |
| FBXL2     | 0.041818 | 0.343585 | 0.465756 | 515 | 515 |
| MIF4GD    | 0.041832 | 0.343426 | 0.465604 | 515 | 515 |
| KIAA1024  | 0.041838 | 0.343349 | 0.465594 | 515 | 515 |
| KCNJ13    | 0.041867 | 0.343023 | 0.465247 | 515 | 366 |
| C10orf140 | 0.04193  | 0.342294 | 0.464448 | 515 | 513 |
| EAPP      | 0.041931 | 0.342279 | 0.464448 | 515 | 515 |
| ELOVL4    | 0.041942 | 0.342147 | 0.464342 | 515 | 514 |
| FAM100B   | 0.041951 | 0.342046 | 0.464236 | 515 | 515 |
| MAP3K4    | 0.041952 | 0.342035 | 0.464236 | 515 | 515 |
| POU5F2    | 0.042026 | 0.341182 | 0.463347 | 515 | 248 |
| GINS2     | 0.042056 | 0.340844 | 0.463046 | 515 | 515 |
| KRTAP4-8  | 0.042092 | 0.340426 | 0.462604 | 515 | 28  |
| EXOSC2    | 0.042123 | 0.340073 | 0.462217 | 515 | 515 |
| C1orf52   | 0.04214  | 0.33988  | 0.46205  | 515 | 515 |

|           |          |          |          |     |     |
|-----------|----------|----------|----------|-----|-----|
| DNAJC1    | 0.042148 | 0.339789 | 0.461957 | 515 | 515 |
| C10orf18  | 0.042157 | 0.339677 | 0.461837 | 515 | 515 |
| FMNL2     | 0.042162 | 0.339621 | 0.461804 | 515 | 515 |
| BEX1      | 0.042166 | 0.339579 | 0.461798 | 515 | 469 |
| ADRB1     | 0.042179 | 0.339433 | 0.461631 | 515 | 508 |
| DECR1     | 0.04219  | 0.339298 | 0.461479 | 515 | 515 |
| ZNF180    | 0.042201 | 0.339175 | 0.461342 | 515 | 515 |
| PPP1R3C   | 0.042205 | 0.339136 | 0.461322 | 515 | 515 |
| NBPF10    | 0.042256 | 0.338544 | 0.460642 | 515 | 515 |
| C18orf21  | 0.042293 | 0.338121 | 0.460255 | 515 | 515 |
| BLZF1     | 0.042295 | 0.338101 | 0.460255 | 515 | 515 |
| OR4F6     | 0.042317 | 0.337845 | 0.459972 | 515 | 4   |
| C1GALT1C1 | 0.042338 | 0.337614 | 0.459751 | 515 | 515 |
| MMP21     | 0.042373 | 0.337216 | 0.459272 | 515 | 366 |
| SLC4A9    | 0.04239  | 0.337021 | 0.459038 | 515 | 309 |
| OSBPL7    | 0.042415 | 0.336731 | 0.45883  | 515 | 515 |
| ZCWPW1    | 0.042421 | 0.336666 | 0.458773 | 515 | 515 |
| OR10H1    | 0.042445 | 0.336394 | 0.458434 | 515 | 198 |
| PRR18     | 0.042464 | 0.336176 | 0.458194 | 515 | 456 |
| OR11G2    | 0.042478 | 0.336012 | 0.458007 | 515 | 6   |
| NPTX2     | 0.042485 | 0.335938 | 0.457968 | 515 | 515 |
| CCDC88C   | 0.042513 | 0.335611 | 0.457678 | 515 | 515 |
| APAF1     | 0.04253  | 0.335422 | 0.457453 | 515 | 515 |
| FAM57B    | 0.042544 | 0.335267 | 0.457303 | 515 | 447 |
| PSMD8     | 0.042545 | 0.335254 | 0.457303 | 515 | 515 |
| SYNPO2L   | 0.042586 | 0.334789 | 0.456744 | 515 | 498 |
| C9orf167  | 0.042606 | 0.334562 | 0.456528 | 515 | 515 |
| SP7       | 0.042606 | 0.334562 | 0.456528 | 515 | 305 |
| LOC285768 | 0.042631 | 0.334277 | 0.456264 | 515 | 381 |
| GLP2R     | 0.042648 | 0.334087 | 0.456067 | 515 | 226 |
| C4orf39   | 0.042677 | 0.333758 | 0.455679 | 515 | 511 |
| MTHFD2    | 0.04268  | 0.333716 | 0.455679 | 515 | 515 |
| CA1       | 0.042686 | 0.333646 | 0.455679 | 515 | 234 |
| PTPN9     | 0.042688 | 0.333623 | 0.455679 | 515 | 515 |
| SPINLW1   | 0.042719 | 0.333277 | 0.455303 | 515 | 370 |
| REG1P     | 0.042719 | 0.333276 | 0.455303 | 515 | 5   |
| HFE       | 0.042762 | 0.332791 | 0.454764 | 515 | 515 |
| TTL2      | 0.042781 | 0.332577 | 0.454533 | 515 | 455 |
| GNRH1     | 0.042787 | 0.332508 | 0.45447  | 515 | 514 |
| SCGB3A2   | 0.042822 | 0.332111 | 0.454051 | 515 | 511 |
| ZDHHC3    | 0.042824 | 0.332091 | 0.454051 | 515 | 515 |
| CEACAM6   | 0.04287  | 0.331566 | 0.453369 | 515 | 515 |
| CXorf49B  | 0.042891 | 0.331338 | 0.453119 | 515 | 225 |
| TTC37     | 0.042891 | 0.331337 | 0.453119 | 515 | 515 |
| USP44     | 0.042902 | 0.331207 | 0.453002 | 515 | 512 |
| VPS13A    | 0.042916 | 0.331048 | 0.452877 | 515 | 515 |
| TMEM70    | 0.042934 | 0.330851 | 0.452669 | 515 | 515 |
| TAS2R41   | 0.042941 | 0.330765 | 0.452615 | 515 | 31  |
| ODF3L1    | 0.042943 | 0.33075  | 0.452615 | 515 | 512 |
| ARMCX3    | 0.042962 | 0.330531 | 0.452355 | 515 | 515 |
| LOC100133 | 0.042995 | 0.330157 | 0.451937 | 515 | 515 |
| ZCCHC11   | 0.043017 | 0.329912 | 0.451663 | 515 | 515 |
| TRIP12    | 0.043028 | 0.329787 | 0.451522 | 515 | 515 |
| ZNF706    | 0.043057 | 0.329459 | 0.451166 | 515 | 515 |

|           |          |          |          |     |     |
|-----------|----------|----------|----------|-----|-----|
| ZNF492    | 0.043095 | 0.32904  | 0.450669 | 515 | 446 |
| APBA2     | 0.043111 | 0.328853 | 0.45046  | 515 | 515 |
| SRP19     | 0.043121 | 0.328747 | 0.450346 | 515 | 515 |
| PALB2     | 0.043173 | 0.328155 | 0.449719 | 515 | 515 |
| OR2T3     | 0.043178 | 0.328099 | 0.449674 | 515 | 22  |
| ODAM      | 0.043181 | 0.328076 | 0.449673 | 515 | 325 |
| CLTA      | 0.043183 | 0.328043 | 0.449658 | 515 | 515 |
| PEX2      | 0.043202 | 0.327838 | 0.449409 | 515 | 515 |
| ARL17B    | 0.04322  | 0.327638 | 0.449196 | 515 | 461 |
| ZFYVE20   | 0.04323  | 0.327516 | 0.44906  | 515 | 515 |
| STK39     | 0.043233 | 0.327486 | 0.449049 | 515 | 515 |
| TTK       | 0.043248 | 0.327323 | 0.448917 | 515 | 515 |
| ETV3L     | 0.043253 | 0.327262 | 0.448865 | 515 | 503 |
| SNORD89   | 0.043264 | 0.327146 | 0.448736 | 515 | 7   |
| ATP13A3   | 0.043296 | 0.326783 | 0.44827  | 515 | 515 |
| LOC149837 | 0.04331  | 0.326631 | 0.448091 | 515 | 515 |
| TMPRSS6   | 0.043327 | 0.326433 | 0.447913 | 515 | 514 |
| IL4       | 0.043348 | 0.326204 | 0.447629 | 515 | 129 |
| SNORA16B  | 0.043366 | 0.326005 | 0.447417 | 515 | 25  |
| DCP1B     | 0.04344  | 0.325172 | 0.446336 | 515 | 515 |
| REST      | 0.043443 | 0.325139 | 0.446336 | 515 | 515 |
| GRIN2A    | 0.043466 | 0.324881 | 0.446059 | 515 | 469 |
| ZFP1      | 0.043505 | 0.324453 | 0.445563 | 515 | 515 |
| VEZT      | 0.043549 | 0.32396  | 0.444977 | 515 | 515 |
| ACTL7A    | 0.043571 | 0.32372  | 0.444679 | 515 | 62  |
| FOXC2     | 0.043586 | 0.323547 | 0.444533 | 515 | 502 |
| STIL      | 0.043587 | 0.323537 | 0.444533 | 515 | 515 |
| TAS2R3    | 0.043599 | 0.323403 | 0.444427 | 515 | 228 |
| PCDHB8    | 0.043606 | 0.32333  | 0.444418 | 515 | 515 |
| YEATS4    | 0.043635 | 0.323    | 0.444086 | 515 | 515 |
| TNFRSF10E | 0.043657 | 0.322761 | 0.443788 | 515 | 515 |
| THSD7A    | 0.043668 | 0.322637 | 0.443648 | 515 | 515 |
| PCDH9     | 0.043691 | 0.322387 | 0.443396 | 515 | 513 |
| RPL39L    | 0.043696 | 0.322329 | 0.443347 | 515 | 515 |
| CES1      | 0.043724 | 0.322015 | 0.442945 | 515 | 515 |
| MYO1B     | 0.043725 | 0.322006 | 0.442945 | 515 | 515 |
| CXCL17    | 0.043726 | 0.321995 | 0.442945 | 515 | 513 |
| LOC729603 | 0.043838 | 0.320758 | 0.441459 | 515 | 515 |
| PRPF4     | 0.04384  | 0.32074  | 0.441459 | 515 | 515 |
| C11orf92  | 0.043867 | 0.320435 | 0.441105 | 515 | 515 |
| FAM58A    | 0.043868 | 0.320423 | 0.441105 | 515 | 515 |
| LOC100190 | 0.043878 | 0.320315 | 0.441032 | 515 | 514 |
| C3orf57   | 0.04388  | 0.320293 | 0.441031 | 515 | 496 |
| FAM104A   | 0.043897 | 0.320108 | 0.440843 | 515 | 515 |
| C17orf105 | 0.043941 | 0.319623 | 0.440352 | 515 | 42  |
| PLA2G2C   | 0.043945 | 0.319571 | 0.440311 | 515 | 133 |
| RHEB      | 0.043963 | 0.319383 | 0.440082 | 515 | 515 |
| ANKLE2    | 0.043986 | 0.31913  | 0.439824 | 515 | 515 |
| BTBD1     | 0.044002 | 0.318953 | 0.439611 | 515 | 515 |
| LOC100129 | 0.044007 | 0.31889  | 0.439585 | 515 | 515 |
| CLRN10S   | 0.044021 | 0.318736 | 0.439402 | 515 | 93  |
| NXF2B     | 0.044036 | 0.31857  | 0.439204 | 515 | 116 |
| PGPEP1    | 0.044082 | 0.31807  | 0.438575 | 515 | 515 |
| C2orf60   | 0.044088 | 0.318003 | 0.438513 | 515 | 515 |

|           |          |          |          |     |     |
|-----------|----------|----------|----------|-----|-----|
| CAND2     | 0.044099 | 0.317883 | 0.438408 | 515 | 515 |
| RNF157    | 0.044195 | 0.316833 | 0.43708  | 515 | 515 |
| CCDC59    | 0.044219 | 0.316565 | 0.436741 | 515 | 515 |
| SDC4      | 0.044225 | 0.3165   | 0.436681 | 515 | 515 |
| HIST4H4   | 0.044233 | 0.316417 | 0.436597 | 515 | 515 |
| KDM4D     | 0.044272 | 0.31598  | 0.436114 | 515 | 515 |
| MICALL2   | 0.044282 | 0.315872 | 0.435995 | 515 | 515 |
| C21orf121 | 0.044315 | 0.315514 | 0.435531 | 515 | 365 |
| CYP11A1   | 0.044356 | 0.31507  | 0.435068 | 515 | 505 |
| ASB18     | 0.044364 | 0.314976 | 0.434999 | 515 | 15  |
| STMN4     | 0.044389 | 0.314702 | 0.434711 | 515 | 157 |
| CPA4      | 0.044414 | 0.314431 | 0.434396 | 515 | 438 |
| SNORA22   | 0.044426 | 0.314304 | 0.434274 | 515 | 51  |
| ATXN8OS   | 0.044431 | 0.314248 | 0.434234 | 515 | 6   |
| ZNF805    | 0.044451 | 0.314035 | 0.43403  | 515 | 515 |
| OR6C3     | 0.04449  | 0.313609 | 0.433471 | 515 | 5   |
| PLEKHA3   | 0.044496 | 0.31354  | 0.433405 | 515 | 515 |
| PCDHB19P  | 0.044497 | 0.313531 | 0.433405 | 515 | 510 |
| LTA4H     | 0.0445   | 0.313498 | 0.433405 | 515 | 515 |
| PAX8      | 0.044514 | 0.313342 | 0.433341 | 515 | 514 |
| RDH16     | 0.044574 | 0.312697 | 0.432599 | 515 | 512 |
| FAM192A   | 0.044577 | 0.312655 | 0.432571 | 515 | 515 |
| MESTIT1   | 0.044623 | 0.312164 | 0.432101 | 515 | 436 |
| EDEM2     | 0.044623 | 0.312158 | 0.432101 | 515 | 515 |
| C6orf15   | 0.044647 | 0.311904 | 0.43189  | 515 | 260 |
| KIAA2022  | 0.044675 | 0.311593 | 0.431519 | 515 | 509 |
| C1orf51   | 0.044683 | 0.311507 | 0.431461 | 515 | 515 |
| CCPG1     | 0.044712 | 0.311198 | 0.431092 | 515 | 515 |
| ZNF471    | 0.044732 | 0.310982 | 0.430852 | 515 | 515 |
| CEACAM7   | 0.044763 | 0.310644 | 0.430414 | 515 | 498 |
| GPR151    | 0.044763 | 0.310641 | 0.430414 | 515 | 47  |
| SRA1      | 0.044784 | 0.310415 | 0.430157 | 515 | 515 |
| CRYAB     | 0.044795 | 0.310292 | 0.430059 | 515 | 515 |
| MED6      | 0.044803 | 0.310212 | 0.430024 | 515 | 515 |
| LOC100240 | 0.044807 | 0.310165 | 0.429989 | 515 | 285 |
| HESRG     | 0.044811 | 0.310125 | 0.429963 | 515 | 144 |
| KCNK9     | 0.044818 | 0.310048 | 0.429915 | 515 | 403 |
| SYNJ2BP   | 0.044857 | 0.309631 | 0.429487 | 515 | 515 |
| DPP7      | 0.044883 | 0.309347 | 0.429122 | 515 | 515 |
| MBD3L1    | 0.044909 | 0.309068 | 0.428765 | 515 | 28  |
| PTCHD3    | 0.044915 | 0.309    | 0.4287   | 515 | 224 |
| SYPL2     | 0.044931 | 0.308829 | 0.428553 | 515 | 515 |
| ZPBP2     | 0.044938 | 0.308756 | 0.428482 | 515 | 224 |
| KRT23     | 0.044939 | 0.308739 | 0.428482 | 515 | 480 |
| TICAM1    | 0.044941 | 0.308723 | 0.428482 | 515 | 515 |
| TMEM121   | 0.044947 | 0.308658 | 0.428466 | 515 | 515 |
| OR6N2     | 0.04496  | 0.308519 | 0.42833  | 515 | 10  |
| FKBP6     | 0.044962 | 0.308493 | 0.428324 | 515 | 404 |
| MBD1      | 0.044963 | 0.308485 | 0.428324 | 515 | 515 |
| CT45A3    | 0.044966 | 0.308449 | 0.428322 | 515 | 68  |
| CES7      | 0.044972 | 0.308387 | 0.428322 | 515 | 107 |
| IGSF9B    | 0.045009 | 0.30799  | 0.427864 | 515 | 501 |
| TNFAIP1   | 0.045054 | 0.307504 | 0.427248 | 515 | 515 |
| POTEH     | 0.045061 | 0.307433 | 0.427179 | 515 | 37  |

|           |          |          |          |     |     |
|-----------|----------|----------|----------|-----|-----|
| TRIM2     | 0.045072 | 0.307316 | 0.427089 | 515 | 515 |
| RPS5      | 0.045096 | 0.307057 | 0.426805 | 515 | 515 |
| ARHGAP33  | 0.045125 | 0.306743 | 0.426487 | 515 | 515 |
| PSG1      | 0.045138 | 0.306601 | 0.426319 | 515 | 110 |
| AP3M2     | 0.045142 | 0.306557 | 0.426319 | 515 | 515 |
| SLC10A2   | 0.045186 | 0.30609  | 0.425786 | 515 | 243 |
| FMN2      | 0.045199 | 0.305949 | 0.42565  | 515 | 472 |
| LRIT3     | 0.04522  | 0.305721 | 0.425392 | 515 | 497 |
| SETD7     | 0.045263 | 0.305266 | 0.424788 | 515 | 515 |
| DPCR1     | 0.045276 | 0.305126 | 0.424623 | 515 | 505 |
| CYTSB     | 0.045278 | 0.305101 | 0.424617 | 515 | 515 |
| RIMS1     | 0.045287 | 0.305008 | 0.424518 | 515 | 483 |
| TAS2R46   | 0.045317 | 0.304683 | 0.424125 | 515 | 136 |
| NCRNA0020 | 0.045345 | 0.304388 | 0.423831 | 515 | 13  |
| EIF2C4    | 0.045359 | 0.304241 | 0.423716 | 515 | 515 |
| ZNF451    | 0.045375 | 0.304063 | 0.423497 | 515 | 515 |
| CT45A4    | 0.045379 | 0.30402  | 0.423466 | 515 | 49  |
| CNTNAP4   | 0.045388 | 0.303931 | 0.423399 | 515 | 262 |
| KRT6C     | 0.045402 | 0.303782 | 0.423253 | 515 | 429 |
| SLC12A8   | 0.045411 | 0.303682 | 0.42315  | 515 | 515 |
| FUNDC2    | 0.04542  | 0.303585 | 0.423068 | 515 | 515 |
| PTPN21    | 0.045424 | 0.303549 | 0.423047 | 515 | 515 |
| ABCC6     | 0.045438 | 0.303397 | 0.422923 | 515 | 515 |
| GANC      | 0.045498 | 0.302754 | 0.422116 | 515 | 515 |
| ARSE      | 0.045501 | 0.302725 | 0.422104 | 515 | 513 |
| WWC2      | 0.045507 | 0.302659 | 0.422049 | 515 | 515 |
| NOS3      | 0.045542 | 0.302284 | 0.421696 | 515 | 515 |
| TLX1NB    | 0.045551 | 0.302197 | 0.421603 | 515 | 97  |
| VRK1      | 0.045562 | 0.302078 | 0.421466 | 515 | 515 |
| KIAA0196  | 0.04557  | 0.301996 | 0.421411 | 515 | 515 |
| PNPLA3    | 0.045582 | 0.301862 | 0.421342 | 515 | 494 |
| TEF       | 0.045586 | 0.301822 | 0.421342 | 515 | 515 |
| MPDZ      | 0.0456   | 0.301677 | 0.421213 | 515 | 515 |
| KPNA3     | 0.045603 | 0.301646 | 0.421213 | 515 | 515 |
| ANAPC5    | 0.045614 | 0.301526 | 0.421108 | 515 | 515 |
| OR4M2     | 0.04563  | 0.301353 | 0.420901 | 515 | 7   |
| PHF6      | 0.045659 | 0.301043 | 0.420522 | 515 | 515 |
| HSD17B4   | 0.045695 | 0.300669 | 0.420176 | 515 | 515 |
| OR11H4    | 0.045717 | 0.300433 | 0.419905 | 515 | 50  |
| CDK19     | 0.045748 | 0.300108 | 0.419538 | 515 | 515 |
| ZNF705D   | 0.045768 | 0.299899 | 0.419364 | 515 | 31  |
| GDAP1L1   | 0.045772 | 0.299857 | 0.419363 | 515 | 383 |
| LOC285735 | 0.045772 | 0.299854 | 0.419363 | 515 | 258 |
| SNORD10   | 0.045779 | 0.29978  | 0.419315 | 515 | 357 |
| CHRM1     | 0.045792 | 0.299636 | 0.419201 | 515 | 396 |
| KAZ       | 0.045806 | 0.299488 | 0.419052 | 515 | 515 |
| COMMD9    | 0.045875 | 0.29876  | 0.418122 | 515 | 515 |
| C14orf166 | 0.045886 | 0.29865  | 0.418027 | 515 | 126 |
| RDH5      | 0.045903 | 0.298465 | 0.417796 | 515 | 515 |
| T         | 0.04596  | 0.297865 | 0.417279 | 515 | 323 |
| CER1      | 0.045964 | 0.297824 | 0.417279 | 515 | 114 |
| CLCA4     | 0.045978 | 0.297684 | 0.417141 | 515 | 280 |
| LOC100270 | 0.045989 | 0.29756  | 0.417055 | 515 | 515 |
| WWTR1     | 0.04604  | 0.297026 | 0.416424 | 515 | 515 |

|           |          |          |          |     |     |
|-----------|----------|----------|----------|-----|-----|
| SNORA84   | 0.04607  | 0.296717 | 0.416049 | 515 | 22  |
| OOEP      | 0.046071 | 0.2967   | 0.416049 | 515 | 328 |
| HTR1E     | 0.046083 | 0.296574 | 0.415965 | 515 | 88  |
| FLJ13224  | 0.046085 | 0.296552 | 0.415964 | 515 | 466 |
| NEK9      | 0.046104 | 0.296353 | 0.415743 | 515 | 515 |
| ARMCX6    | 0.046105 | 0.296349 | 0.415743 | 515 | 515 |
| PTP4A2    | 0.046107 | 0.296329 | 0.415743 | 515 | 515 |
| SLC4A11   | 0.046123 | 0.296152 | 0.415549 | 515 | 515 |
| KIAA0391  | 0.046155 | 0.295819 | 0.41511  | 515 | 515 |
| FMR1      | 0.046201 | 0.295338 | 0.414581 | 515 | 515 |
| C1orf168  | 0.046208 | 0.295262 | 0.414504 | 515 | 491 |
| KIAA0020  | 0.04621  | 0.295244 | 0.414504 | 515 | 515 |
| FIGLA     | 0.046225 | 0.29509  | 0.414349 | 515 | 62  |
| TMPRSS11F | 0.046248 | 0.294849 | 0.414069 | 515 | 107 |
| MRGPRX1   | 0.046281 | 0.294504 | 0.413671 | 515 | 4   |
| WNT8A     | 0.046296 | 0.29435  | 0.413514 | 515 | 35  |
| CRTC3     | 0.046322 | 0.29408  | 0.413221 | 515 | 515 |
| TAF1B     | 0.046356 | 0.293716 | 0.412855 | 515 | 515 |
| MAGEC3    | 0.04636  | 0.293675 | 0.412826 | 515 | 265 |
| KIAA1797  | 0.046389 | 0.293381 | 0.412441 | 515 | 515 |
| LOC26102  | 0.046407 | 0.293193 | 0.412207 | 515 | 338 |
| LOC100132 | 0.046409 | 0.293165 | 0.412207 | 515 | 515 |
| RPAP2     | 0.046423 | 0.29302  | 0.412109 | 515 | 515 |
| KPRP      | 0.046445 | 0.292789 | 0.411842 | 515 | 47  |
| OR51B5    | 0.046447 | 0.292775 | 0.411842 | 515 | 155 |
| CHRM5     | 0.046456 | 0.292677 | 0.411742 | 515 | 474 |
| FAM179B   | 0.046484 | 0.292389 | 0.411365 | 515 | 515 |
| PSMD6     | 0.046495 | 0.292272 | 0.411288 | 515 | 515 |
| HBZ       | 0.046515 | 0.292065 | 0.411071 | 515 | 115 |
| ZNF761    | 0.046528 | 0.291931 | 0.410953 | 515 | 515 |
| ADAM17    | 0.046533 | 0.291875 | 0.410903 | 515 | 515 |
| RTP3      | 0.046535 | 0.291855 | 0.410903 | 515 | 72  |
| ATP1B4    | 0.046554 | 0.291658 | 0.410685 | 515 | 43  |
| NTN5      | 0.046571 | 0.291486 | 0.410529 | 515 | 486 |
| LOC284798 | 0.04658  | 0.291388 | 0.410448 | 515 | 365 |
| XP04      | 0.046581 | 0.291381 | 0.410448 | 515 | 515 |
| BAI3      | 0.046616 | 0.291019 | 0.410015 | 515 | 500 |
| C3orf51   | 0.046636 | 0.290815 | 0.409785 | 515 | 91  |
| C5orf45   | 0.046651 | 0.290657 | 0.409707 | 515 | 515 |
| SLC22A2   | 0.046657 | 0.290595 | 0.409649 | 515 | 140 |
| LOC340017 | 0.046677 | 0.290391 | 0.409391 | 515 | 170 |
| NKTR      | 0.046687 | 0.290286 | 0.4093   | 515 | 515 |
| KIAA1324L | 0.046712 | 0.290024 | 0.408959 | 515 | 515 |
| MYO3A     | 0.046731 | 0.289826 | 0.408738 | 515 | 424 |
| C19orf18  | 0.04675  | 0.289637 | 0.4085   | 515 | 508 |
| NTF3      | 0.046768 | 0.289447 | 0.40829  | 515 | 507 |
| TMEM136   | 0.046797 | 0.289148 | 0.407954 | 515 | 515 |
| DEFA4     | 0.046801 | 0.289103 | 0.407949 | 515 | 113 |
| PCDHB1    | 0.046807 | 0.289046 | 0.407899 | 515 | 296 |
| SYNC      | 0.046823 | 0.28888  | 0.407778 | 515 | 515 |
| CHMP5     | 0.046834 | 0.288761 | 0.407639 | 515 | 515 |
| OR13A1    | 0.046837 | 0.288736 | 0.407639 | 515 | 470 |
| ELFN1     | 0.046843 | 0.288675 | 0.407604 | 515 | 514 |
| TREM1     | 0.046889 | 0.2882   | 0.407048 | 515 | 515 |



|           |          |          |          |     |     |
|-----------|----------|----------|----------|-----|-----|
| LLPH      | 0.0469   | 0.288084 | 0.40696  | 515 | 515 |
| LOC256880 | 0.046939 | 0.287683 | 0.406634 | 515 | 501 |
| SYT1      | 0.046946 | 0.28761  | 0.406608 | 515 | 515 |
| DYNC2H1   | 0.046986 | 0.287202 | 0.406179 | 515 | 515 |
| ABCB7     | 0.047136 | 0.28566  | 0.404289 | 515 | 515 |
| GOLGA8B   | 0.047146 | 0.285567 | 0.404251 | 515 | 515 |
| C9orf57   | 0.04716  | 0.285421 | 0.404122 | 515 | 76  |
| PCDH20    | 0.047192 | 0.285087 | 0.403759 | 515 | 512 |
| SLC01B3   | 0.047196 | 0.285052 | 0.403743 | 515 | 389 |
| PRND      | 0.0472   | 0.285006 | 0.403707 | 515 | 492 |
| CRYGC     | 0.047213 | 0.284882 | 0.403559 | 515 | 21  |
| PLK4      | 0.047228 | 0.28472  | 0.403358 | 515 | 515 |
| DCAF7     | 0.047235 | 0.284654 | 0.403303 | 515 | 515 |
| ZNF767    | 0.047335 | 0.283635 | 0.402078 | 515 | 515 |
| CCDC15    | 0.047336 | 0.283622 | 0.402078 | 515 | 515 |
| THYN1     | 0.047375 | 0.283222 | 0.401635 | 515 | 515 |
| DRD2      | 0.047387 | 0.283101 | 0.401549 | 515 | 428 |
| ELP2      | 0.04741  | 0.282875 | 0.401339 | 515 | 515 |
| C2orf50   | 0.047424 | 0.28273  | 0.401193 | 515 | 509 |
| IL1F6     | 0.04745  | 0.282467 | 0.400849 | 515 | 55  |
| NPEPPS    | 0.047453 | 0.282433 | 0.400836 | 515 | 515 |
| CSMD1     | 0.047457 | 0.282389 | 0.400824 | 515 | 476 |
| AQP7P1    | 0.047468 | 0.282278 | 0.400722 | 515 | 427 |
| RFX3      | 0.047494 | 0.282022 | 0.400416 | 515 | 515 |
| AKAP10    | 0.047498 | 0.281972 | 0.400373 | 515 | 515 |
| LOC652276 | 0.0475   | 0.281958 | 0.400373 | 515 | 515 |
| TSPO      | 0.047524 | 0.281717 | 0.400097 | 515 | 515 |
| ZNF616    | 0.047568 | 0.281266 | 0.399614 | 515 | 515 |
| ZAK       | 0.047571 | 0.281242 | 0.399614 | 515 | 515 |
| CFLP1     | 0.047585 | 0.2811   | 0.399476 | 515 | 438 |
| NMT1      | 0.047618 | 0.280763 | 0.399053 | 515 | 515 |
| SNORA56   | 0.047624 | 0.2807   | 0.398992 | 515 | 25  |
| KRT76     | 0.047633 | 0.280612 | 0.398896 | 515 | 47  |
| GPR123    | 0.047704 | 0.279888 | 0.398009 | 515 | 308 |
| ELOF1     | 0.047727 | 0.279657 | 0.397765 | 515 | 515 |
| FLJ35390  | 0.047733 | 0.279601 | 0.397737 | 515 | 515 |
| HEATR6    | 0.047737 | 0.279558 | 0.397708 | 515 | 515 |
| C16orf75  | 0.047752 | 0.279413 | 0.397559 | 515 | 515 |
| RHOBTB3   | 0.047757 | 0.279363 | 0.397515 | 515 | 515 |
| C14orf183 | 0.047797 | 0.278959 | 0.397026 | 515 | 113 |
| PON2      | 0.047813 | 0.278793 | 0.396817 | 515 | 515 |
| CCDC99    | 0.047814 | 0.278785 | 0.396817 | 515 | 515 |
| GPSM1     | 0.047864 | 0.278285 | 0.396151 | 515 | 515 |
| C10orf131 | 0.047881 | 0.278105 | 0.39598  | 515 | 323 |
| PAR-SN    | 0.047882 | 0.278099 | 0.39598  | 515 | 515 |
| SFRS14    | 0.047884 | 0.278081 | 0.39598  | 515 | 515 |
| TAF7L     | 0.04791  | 0.277822 | 0.395662 | 515 | 442 |
| ZNF223    | 0.047973 | 0.27719  | 0.394917 | 515 | 515 |
| CA7       | 0.047979 | 0.277122 | 0.394867 | 515 | 354 |
| KIF3C     | 0.047996 | 0.276959 | 0.394687 | 515 | 515 |
| ANXA2P1   | 0.048017 | 0.276743 | 0.394461 | 515 | 515 |
| RNF181    | 0.048041 | 0.276508 | 0.394155 | 515 | 515 |
| SAMD11    | 0.048055 | 0.276364 | 0.394062 | 515 | 515 |
| NNMT      | 0.048066 | 0.276256 | 0.393964 | 515 | 515 |

|           |          |          |          |     |     |
|-----------|----------|----------|----------|-----|-----|
| SERPINB13 | 0.048105 | 0.275865 | 0.393491 | 515 | 270 |
| KIFAP3    | 0.048111 | 0.275802 | 0.393446 | 515 | 515 |
| CDSN      | 0.04812  | 0.275718 | 0.393394 | 515 | 513 |
| ZNF26     | 0.04813  | 0.275615 | 0.393293 | 515 | 515 |
| PPFIA4    | 0.048134 | 0.275579 | 0.393279 | 515 | 514 |
| SERPINB2  | 0.048145 | 0.275466 | 0.393147 | 515 | 448 |
| BEND2     | 0.048151 | 0.275407 | 0.39309  | 515 | 96  |
| NROB2     | 0.04821  | 0.274819 | 0.392419 | 515 | 497 |
| TPM1      | 0.048243 | 0.274493 | 0.391981 | 515 | 515 |
| NTF4      | 0.048247 | 0.27445  | 0.391948 | 515 | 512 |
| TOE1      | 0.048248 | 0.274435 | 0.391948 | 515 | 515 |
| DNAJB6    | 0.048249 | 0.274432 | 0.391948 | 515 | 515 |
| GML       | 0.048279 | 0.274134 | 0.391693 | 515 | 56  |
| DKFZp779M | 0.048288 | 0.274038 | 0.391583 | 515 | 479 |
| NODAL     | 0.048294 | 0.273985 | 0.391536 | 515 | 501 |
| BCL3      | 0.048305 | 0.273875 | 0.391433 | 515 | 515 |
| NDFIP1    | 0.04831  | 0.273824 | 0.391393 | 515 | 515 |
| COL4A1    | 0.048311 | 0.27381  | 0.391393 | 515 | 515 |
| LDHA      | 0.048312 | 0.2738   | 0.391393 | 515 | 515 |
| TRPM1     | 0.048315 | 0.273768 | 0.391393 | 515 | 181 |
| OR2AE1    | 0.048327 | 0.273658 | 0.391292 | 515 | 173 |
| SLC38A9   | 0.048332 | 0.273605 | 0.391245 | 515 | 515 |
| ASB12     | 0.048333 | 0.273593 | 0.391245 | 515 | 433 |
| EFCAB6    | 0.048364 | 0.273289 | 0.390933 | 515 | 514 |
| LRTM2     | 0.048407 | 0.272859 | 0.390401 | 515 | 188 |
| CENPQ     | 0.048427 | 0.272662 | 0.390204 | 515 | 515 |
| DNAH11    | 0.048428 | 0.272648 | 0.390204 | 515 | 514 |
| SMARCA5   | 0.04844  | 0.272533 | 0.390074 | 515 | 515 |
| ZSCAN18   | 0.048495 | 0.27199  | 0.389375 | 515 | 515 |
| PAGE5     | 0.048505 | 0.271885 | 0.389259 | 515 | 191 |
| CAMLG     | 0.048543 | 0.271509 | 0.388887 | 515 | 515 |
| SNORD116- | 0.048558 | 0.271368 | 0.388769 | 515 | 508 |
| GLRX3     | 0.048575 | 0.2712   | 0.388556 | 515 | 515 |
| ZP1       | 0.048591 | 0.271037 | 0.388351 | 515 | 371 |
| RPS14     | 0.048654 | 0.270417 | 0.387573 | 515 | 515 |
| MKI67     | 0.048663 | 0.270332 | 0.387535 | 515 | 515 |
| LOC285740 | 0.048665 | 0.270306 | 0.387526 | 515 | 192 |
| ZNF596    | 0.048688 | 0.270076 | 0.387252 | 515 | 515 |
| SNORA5A   | 0.048721 | 0.269756 | 0.386848 | 515 | 98  |
| RP1-177G6 | 0.048727 | 0.269693 | 0.386785 | 515 | 129 |
| SUM04     | 0.048728 | 0.269688 | 0.386785 | 515 | 417 |
| ACBD7     | 0.048772 | 0.269256 | 0.386325 | 515 | 515 |
| OR2F1     | 0.048772 | 0.269252 | 0.386325 | 515 | 18  |
| C1orf116  | 0.048795 | 0.269027 | 0.386052 | 515 | 515 |
| NUDCD1    | 0.048808 | 0.2689   | 0.385897 | 515 | 515 |
| NCKAP5    | 0.048835 | 0.268637 | 0.385602 | 515 | 515 |
| C21orf29  | 0.04888  | 0.268193 | 0.385077 | 515 | 494 |
| ATAD5     | 0.048886 | 0.268133 | 0.385017 | 515 | 515 |
| CACNA1G   | 0.048889 | 0.268102 | 0.385    | 515 | 505 |
| SPRR2G    | 0.048905 | 0.267948 | 0.384835 | 515 | 129 |
| RIT2      | 0.04896  | 0.267411 | 0.384119 | 515 | 52  |
| LOC678655 | 0.048982 | 0.267193 | 0.383861 | 515 | 515 |
| USP16     | 0.049035 | 0.266679 | 0.383232 | 515 | 515 |
| PIP5K1C   | 0.049038 | 0.266652 | 0.383221 | 515 | 515 |

|           |          |          |          |     |     |
|-----------|----------|----------|----------|-----|-----|
| CATSPER4  | 0.049082 | 0.266219 | 0.382627 | 515 | 103 |
| PLP1      | 0.049083 | 0.266207 | 0.382627 | 515 | 359 |
| PTPN5     | 0.049092 | 0.266122 | 0.38257  | 515 | 408 |
| PLAC8L1   | 0.049104 | 0.266    | 0.38245  | 515 | 375 |
| RPS6      | 0.049146 | 0.265594 | 0.381975 | 515 | 515 |
| RGN       | 0.049187 | 0.265197 | 0.381459 | 515 | 514 |
| LMF1      | 0.049206 | 0.265009 | 0.381244 | 515 | 515 |
| GMEB1     | 0.049244 | 0.264644 | 0.380828 | 515 | 515 |
| FAM35A    | 0.049259 | 0.264501 | 0.380678 | 515 | 515 |
| FDPSL2A   | 0.04929  | 0.264197 | 0.380295 | 515 | 511 |
| KIAA1199  | 0.049298 | 0.264119 | 0.38021  | 515 | 515 |
| LOC441089 | 0.049312 | 0.263981 | 0.380066 | 515 | 515 |
| IL1RAPL1  | 0.049394 | 0.263185 | 0.379057 | 515 | 151 |
| VHL       | 0.049399 | 0.263142 | 0.379022 | 515 | 515 |
| LYRM5     | 0.049434 | 0.262798 | 0.378676 | 515 | 515 |
| TPRX1     | 0.049474 | 0.262419 | 0.378226 | 515 | 40  |
| MEG8      | 0.049503 | 0.262134 | 0.377841 | 515 | 95  |
| CUL2      | 0.049524 | 0.26193  | 0.377629 | 515 | 515 |
| FAM40B    | 0.049537 | 0.261811 | 0.377513 | 515 | 515 |
| LARP7     | 0.049566 | 0.261528 | 0.377268 | 515 | 515 |
| UXT       | 0.049569 | 0.261498 | 0.377252 | 515 | 515 |
| C8orf37   | 0.049576 | 0.261427 | 0.377205 | 515 | 515 |
| TPBG      | 0.049594 | 0.261261 | 0.377046 | 515 | 515 |
| HOXB5     | 0.049604 | 0.261157 | 0.376951 | 515 | 515 |
| MOV10L1   | 0.049622 | 0.260992 | 0.376767 | 515 | 498 |
| LRRC40    | 0.049632 | 0.260891 | 0.376654 | 515 | 515 |
| LOC157627 | 0.049687 | 0.260367 | 0.376027 | 515 | 47  |
| C1orf130  | 0.049742 | 0.259838 | 0.375399 | 515 | 514 |
| SMTNL2    | 0.049745 | 0.259804 | 0.375377 | 515 | 512 |
| KIF25     | 0.049755 | 0.259712 | 0.375325 | 515 | 481 |
| C11orf9   | 0.049814 | 0.259141 | 0.374554 | 515 | 515 |
| C9orf5    | 0.049843 | 0.258864 | 0.374207 | 515 | 515 |
| RFWD3     | 0.049889 | 0.25843  | 0.373715 | 515 | 515 |
| LMNB1     | 0.04989  | 0.258421 | 0.373715 | 515 | 515 |
| MINK1     | 0.049901 | 0.258309 | 0.373595 | 515 | 515 |
| EML3      | 0.049903 | 0.258298 | 0.373595 | 515 | 515 |
| RFPL2     | 0.049909 | 0.258237 | 0.373551 | 515 | 451 |
| ADAM29    | 0.04991  | 0.258229 | 0.373551 | 515 | 408 |
| C9orf47   | 0.04992  | 0.258128 | 0.373467 | 515 | 509 |
| PPAP2A    | 0.049947 | 0.257875 | 0.373184 | 515 | 515 |
| COQ10B    | 0.049995 | 0.25742  | 0.372659 | 515 | 515 |
| SPAG1     | 0.050002 | 0.25735  | 0.372586 | 515 | 515 |
| MECP2     | 0.050009 | 0.257281 | 0.372512 | 515 | 515 |
| KLK4      | 0.05001  | 0.257273 | 0.372512 | 515 | 376 |
| C2orf18   | 0.050018 | 0.257195 | 0.372442 | 515 | 515 |
| SCARA3    | 0.050025 | 0.25713  | 0.372374 | 515 | 515 |
| LASS6     | 0.050025 | 0.257127 | 0.372374 | 515 | 515 |
| GP6       | 0.050036 | 0.257023 | 0.372273 | 515 | 463 |
| ESD       | 0.05005  | 0.256889 | 0.372106 | 515 | 515 |
| FOXB2     | 0.050054 | 0.256854 | 0.372083 | 515 | 23  |
| MC5R      | 0.05006  | 0.256797 | 0.372041 | 515 | 279 |
| KLHL11    | 0.050155 | 0.255896 | 0.370883 | 515 | 515 |
| SLC26A7   | 0.050204 | 0.255431 | 0.37029  | 515 | 502 |
| MUC12     | 0.05023  | 0.255184 | 0.370039 | 515 | 496 |

|           |          |          |          |     |     |
|-----------|----------|----------|----------|-----|-----|
| APBB2     | 0.050258 | 0.254919 | 0.369692 | 515 | 515 |
| TAS2R60   | 0.05028  | 0.254713 | 0.369463 | 515 | 132 |
| GLO1      | 0.050286 | 0.254656 | 0.369407 | 515 | 515 |
| GOLGA7B   | 0.050294 | 0.254577 | 0.369319 | 515 | 515 |
| TRPM7     | 0.050312 | 0.254412 | 0.369134 | 515 | 515 |
| NUDCD2    | 0.050336 | 0.254181 | 0.368852 | 515 | 515 |
| BBOX1     | 0.050356 | 0.253994 | 0.368612 | 515 | 468 |
| C7orf52   | 0.050431 | 0.253285 | 0.367846 | 515 | 347 |
| GDF6      | 0.050477 | 0.252853 | 0.367271 | 515 | 466 |
| MED12L    | 0.050481 | 0.252811 | 0.367237 | 515 | 506 |
| GPC3      | 0.050485 | 0.252777 | 0.367214 | 515 | 515 |
| C17orf79  | 0.050492 | 0.252706 | 0.367139 | 515 | 515 |
| CKAP2     | 0.050507 | 0.252573 | 0.366983 | 515 | 515 |
| GRIK3     | 0.05052  | 0.252442 | 0.366875 | 515 | 472 |
| CSRP3     | 0.050528 | 0.252368 | 0.366834 | 515 | 112 |
| ZDHHC6    | 0.050552 | 0.252146 | 0.366618 | 515 | 515 |
| GINS3     | 0.050555 | 0.252118 | 0.366611 | 515 | 515 |
| C21orf54  | 0.050581 | 0.251874 | 0.366329 | 515 | 17  |
| C6orf57   | 0.050589 | 0.2518   | 0.366257 | 515 | 515 |
| ZIM3      | 0.050594 | 0.251756 | 0.36624  | 515 | 12  |
| PGLYRP1   | 0.050613 | 0.251574 | 0.366053 | 515 | 265 |
| TEX15     | 0.050645 | 0.251273 | 0.365668 | 515 | 336 |
| FAM172A   | 0.050649 | 0.251238 | 0.365643 | 515 | 515 |
| SERPINB6  | 0.050667 | 0.251068 | 0.365529 | 515 | 515 |
| PSAT1     | 0.050671 | 0.25103  | 0.365529 | 515 | 515 |
| LIPK      | 0.05068  | 0.250943 | 0.365453 | 515 | 215 |
| OR1N1     | 0.050684 | 0.250904 | 0.365423 | 515 | 49  |
| BMF       | 0.050692 | 0.250838 | 0.365353 | 515 | 515 |
| AP3B1     | 0.0507   | 0.250754 | 0.365258 | 515 | 515 |
| C10orf27  | 0.050718 | 0.250587 | 0.365041 | 515 | 106 |
| SLC22A14  | 0.05074  | 0.250387 | 0.364777 | 515 | 345 |
| C20orf173 | 0.050748 | 0.250308 | 0.364712 | 515 | 47  |
| LEPR      | 0.05083  | 0.249544 | 0.363893 | 515 | 515 |
| FAM72B    | 0.050851 | 0.249348 | 0.363654 | 515 | 515 |
| CBWD3     | 0.050874 | 0.249135 | 0.363376 | 515 | 515 |
| IRS1      | 0.050884 | 0.249042 | 0.363267 | 515 | 515 |
| CPT1C     | 0.050897 | 0.248921 | 0.363171 | 515 | 515 |
| SPANXN2   | 0.0509   | 0.248896 | 0.363171 | 515 | 11  |
| PIN1      | 0.050908 | 0.248821 | 0.363103 | 515 | 515 |
| DCTN4     | 0.050929 | 0.248626 | 0.362909 | 515 | 515 |
| SNORA64   | 0.050934 | 0.248578 | 0.362882 | 515 | 38  |
| MAPK9     | 0.050946 | 0.248462 | 0.362846 | 515 | 515 |
| TRIM63    | 0.050946 | 0.248462 | 0.362846 | 515 | 361 |
| DLC1      | 0.050949 | 0.248433 | 0.362846 | 515 | 515 |
| SEPW1     | 0.050949 | 0.248432 | 0.362846 | 515 | 515 |
| FGF10     | 0.050956 | 0.248372 | 0.362845 | 515 | 232 |
| C11orf70  | 0.050994 | 0.24802  | 0.362385 | 515 | 515 |
| ZNF484    | 0.050994 | 0.248018 | 0.362385 | 515 | 515 |
| CCL14-CCL | 0.051002 | 0.247948 | 0.362333 | 515 | 203 |
| CDC42SE1  | 0.051038 | 0.247605 | 0.361911 | 515 | 515 |
| LMBR1L    | 0.051041 | 0.247582 | 0.361903 | 515 | 515 |
| TBCCD1    | 0.051074 | 0.247273 | 0.361505 | 515 | 515 |
| RPL23AP64 | 0.051093 | 0.247102 | 0.361307 | 515 | 501 |
| VWA3B     | 0.051097 | 0.247066 | 0.361281 | 515 | 511 |

|           |          |          |          |     |     |
|-----------|----------|----------|----------|-----|-----|
| NEGR1     | 0.051098 | 0.24705  | 0.361281 | 515 | 515 |
| IFNA5     | 0.051098 | 0.247049 | 0.361281 | 515 | 56  |
| SGOL2     | 0.05112  | 0.246851 | 0.3611   | 515 | 515 |
| OR51B4    | 0.051149 | 0.24658  | 0.360782 | 515 | 149 |
| SPOPL     | 0.051155 | 0.246527 | 0.360757 | 515 | 515 |
| PRM2      | 0.051212 | 0.245999 | 0.360089 | 515 | 21  |
| SCARF2    | 0.051245 | 0.24569  | 0.359704 | 515 | 515 |
| CPLX4     | 0.051269 | 0.24547  | 0.359469 | 515 | 229 |
| PSMB3     | 0.051295 | 0.245232 | 0.359177 | 515 | 515 |
| RCN3      | 0.051335 | 0.244869 | 0.358699 | 515 | 515 |
| PRKG2     | 0.051358 | 0.244653 | 0.358436 | 515 | 503 |
| SEPX1     | 0.051399 | 0.244279 | 0.357991 | 515 | 515 |
| SCN2A     | 0.051403 | 0.244236 | 0.357982 | 515 | 502 |
| LEFTY2    | 0.051414 | 0.244142 | 0.357895 | 515 | 493 |
| C20orf166 | 0.051485 | 0.24349  | 0.357123 | 515 | 37  |
| KBTBD10   | 0.051497 | 0.243373 | 0.357004 | 515 | 515 |
| CNGB1     | 0.051507 | 0.243289 | 0.356907 | 515 | 507 |
| TMPO      | 0.051515 | 0.243208 | 0.356841 | 515 | 515 |
| HIST1H2AG | 0.051525 | 0.243117 | 0.356733 | 515 | 462 |
| ANKRD20A4 | 0.051567 | 0.242732 | 0.356325 | 515 | 307 |
| CPNE8     | 0.051568 | 0.242724 | 0.356325 | 515 | 515 |
| IP6K3     | 0.051591 | 0.242512 | 0.356081 | 515 | 510 |
| RNF141    | 0.051612 | 0.242328 | 0.355836 | 515 | 515 |
| GLIS2     | 0.051612 | 0.242327 | 0.355836 | 515 | 515 |
| OR2A2     | 0.051643 | 0.242041 | 0.35552  | 515 | 48  |
| DSC2      | 0.051658 | 0.241909 | 0.355378 | 515 | 515 |
| ZC3H10    | 0.051658 | 0.241909 | 0.355378 | 515 | 515 |
| TMC6      | 0.051742 | 0.241137 | 0.354426 | 515 | 515 |
| ADCYAP1R1 | 0.051778 | 0.240814 | 0.354003 | 515 | 280 |
| LGALS14   | 0.051812 | 0.240505 | 0.353628 | 515 | 49  |
| KDR       | 0.051822 | 0.240412 | 0.353543 | 515 | 515 |
| NPY6R     | 0.051837 | 0.240275 | 0.353367 | 515 | 357 |
| COL27A1   | 0.051837 | 0.240273 | 0.353367 | 515 | 515 |
| MLF1IP    | 0.051843 | 0.240224 | 0.353367 | 515 | 515 |
| LOC399815 | 0.051843 | 0.240218 | 0.353367 | 515 | 509 |
| MGC57346  | 0.05185  | 0.240154 | 0.353319 | 515 | 515 |
| CPT1B     | 0.051859 | 0.240073 | 0.353262 | 515 | 515 |
| LCN2      | 0.051866 | 0.240008 | 0.353235 | 515 | 514 |
| ZNF141    | 0.051891 | 0.239788 | 0.352988 | 515 | 515 |
| SLC30A2   | 0.051901 | 0.239698 | 0.352908 | 515 | 468 |
| C1orf127  | 0.051916 | 0.239559 | 0.352756 | 515 | 508 |
| LOC400927 | 0.051924 | 0.239481 | 0.352667 | 515 | 515 |
| NKX3-2    | 0.051938 | 0.239362 | 0.352518 | 515 | 446 |
| ADAM7     | 0.051998 | 0.238812 | 0.351863 | 515 | 42  |
| WASF2     | 0.052034 | 0.238491 | 0.351494 | 515 | 515 |
| KHDC1     | 0.052046 | 0.238378 | 0.351379 | 515 | 515 |
| RABL2B    | 0.052069 | 0.238179 | 0.351163 | 515 | 515 |
| SLC35F5   | 0.052076 | 0.23811  | 0.351088 | 515 | 515 |
| RASIP1    | 0.052077 | 0.238104 | 0.351088 | 515 | 515 |
| C5orf38   | 0.052082 | 0.238055 | 0.351058 | 515 | 512 |
| UBE2G2    | 0.052101 | 0.237887 | 0.350862 | 515 | 515 |
| VSX1      | 0.052102 | 0.237876 | 0.350862 | 515 | 399 |
| PCDHB14   | 0.052164 | 0.237317 | 0.350125 | 515 | 515 |
| MLLT4     | 0.052189 | 0.237093 | 0.349872 | 515 | 515 |

|           |          |          |          |     |     |
|-----------|----------|----------|----------|-----|-----|
| FIBCD1    | 0.052212 | 0.236889 | 0.349648 | 515 | 508 |
| C17orf46  | 0.052213 | 0.236879 | 0.349648 | 515 | 504 |
| VTA1      | 0.052217 | 0.236837 | 0.349623 | 515 | 515 |
| C4orf34   | 0.05222  | 0.236813 | 0.349613 | 515 | 515 |
| OR2AG2    | 0.052235 | 0.23668  | 0.349547 | 515 | 180 |
| PLCD1     | 0.052269 | 0.236373 | 0.349169 | 515 | 515 |
| RILP      | 0.052283 | 0.236248 | 0.349011 | 515 | 515 |
| SLC5A7    | 0.05229  | 0.236182 | 0.348965 | 515 | 338 |
| DNASE1L2  | 0.052312 | 0.235988 | 0.348739 | 515 | 506 |
| IQCA1     | 0.052334 | 0.235791 | 0.348491 | 515 | 513 |
| LIMS3-LOC | 0.052376 | 0.235416 | 0.348039 | 515 | 515 |
| POM121L4F | 0.052391 | 0.235283 | 0.347894 | 515 | 204 |
| LOC168474 | 0.052392 | 0.235273 | 0.347894 | 515 | 487 |
| FAM183A   | 0.052395 | 0.23524  | 0.347883 | 515 | 477 |
| GDF2      | 0.052404 | 0.23516  | 0.34779  | 515 | 37  |
| CUL4B     | 0.052405 | 0.235152 | 0.34779  | 515 | 515 |
| MORF4     | 0.052413 | 0.235084 | 0.347779 | 515 | 508 |
| TRAPPC2   | 0.05244  | 0.23484  | 0.347471 | 515 | 515 |
| MYH4      | 0.05246  | 0.234663 | 0.347259 | 515 | 134 |
| R3HDM1    | 0.052506 | 0.234252 | 0.346755 | 515 | 515 |
| CD302     | 0.052512 | 0.234198 | 0.346751 | 515 | 515 |
| ZNF253    | 0.052512 | 0.234197 | 0.346751 | 515 | 515 |
| C20orf196 | 0.052524 | 0.234091 | 0.34667  | 515 | 515 |
| BTBD11    | 0.052536 | 0.233981 | 0.346559 | 515 | 515 |
| MDN1      | 0.052539 | 0.233954 | 0.346558 | 515 | 515 |
| NOSIP     | 0.052545 | 0.233908 | 0.346528 | 515 | 515 |
| PTPN4     | 0.052558 | 0.233792 | 0.346381 | 515 | 515 |
| MYLK2     | 0.052645 | 0.233017 | 0.345311 | 515 | 503 |
| ABCE1     | 0.05267  | 0.232793 | 0.345039 | 515 | 515 |
| KNDC1     | 0.052737 | 0.232194 | 0.344218 | 515 | 513 |
| CYB561D2  | 0.052758 | 0.232011 | 0.344024 | 515 | 515 |
| TMEM144   | 0.052796 | 0.231678 | 0.343658 | 515 | 515 |
| SNORD97   | 0.052807 | 0.231581 | 0.343539 | 515 | 246 |
| LTV1      | 0.052813 | 0.23152  | 0.343474 | 515 | 515 |
| DNER      | 0.052819 | 0.23147  | 0.343426 | 515 | 511 |
| ZBTB34    | 0.052855 | 0.231152 | 0.342979 | 515 | 515 |
| TAS2R4    | 0.052868 | 0.231039 | 0.342836 | 515 | 464 |
| AGFG2     | 0.052884 | 0.230901 | 0.342708 | 515 | 515 |
| NCOA2     | 0.052898 | 0.230774 | 0.342546 | 515 | 515 |
| MXD3      | 0.052923 | 0.230555 | 0.342273 | 515 | 515 |
| MID1IP1   | 0.052952 | 0.230296 | 0.341963 | 515 | 515 |
| GLYCTK    | 0.052979 | 0.230058 | 0.341634 | 515 | 515 |
| MOCS2     | 0.052989 | 0.229972 | 0.341532 | 515 | 515 |
| PCDHGC3   | 0.053008 | 0.229801 | 0.341372 | 515 | 515 |
| PLK2      | 0.053009 | 0.229794 | 0.341372 | 515 | 515 |
| UBE2W     | 0.053039 | 0.229533 | 0.341108 | 515 | 515 |
| FBXO15    | 0.053051 | 0.229423 | 0.340995 | 515 | 511 |
| GPR63     | 0.053054 | 0.229398 | 0.340983 | 515 | 498 |
| ZSCAN12P1 | 0.053064 | 0.229309 | 0.340877 | 515 | 515 |
| PLAC1     | 0.053098 | 0.229017 | 0.340518 | 515 | 479 |
| RNF17     | 0.053129 | 0.228737 | 0.340204 | 515 | 251 |
| FBLN5     | 0.053136 | 0.228676 | 0.340139 | 515 | 515 |
| PHLDA2    | 0.053141 | 0.228635 | 0.340103 | 515 | 515 |
| FAM21A    | 0.053143 | 0.228614 | 0.340096 | 515 | 515 |

|           |          |          |          |     |     |
|-----------|----------|----------|----------|-----|-----|
| HEATR7B2  | 0.053181 | 0.228282 | 0.339653 | 515 | 102 |
| TBL1XR1   | 0.053191 | 0.228197 | 0.339552 | 515 | 515 |
| CCDC67    | 0.05325  | 0.227683 | 0.338989 | 515 | 471 |
| SSTR4     | 0.053268 | 0.227524 | 0.338777 | 515 | 91  |
| MTCP1NB   | 0.053284 | 0.227385 | 0.338646 | 515 | 515 |
| RPL35     | 0.053345 | 0.226852 | 0.337953 | 515 | 515 |
| CCDC79    | 0.053363 | 0.22669  | 0.337788 | 515 | 184 |
| SPATA1    | 0.053368 | 0.226649 | 0.337751 | 515 | 481 |
| IGF2R     | 0.053372 | 0.226616 | 0.337728 | 515 | 515 |
| SCARNA2   | 0.053387 | 0.226489 | 0.337589 | 515 | 496 |
| SEMA3G    | 0.053387 | 0.226486 | 0.337589 | 515 | 515 |
| TOP2A     | 0.053405 | 0.226325 | 0.337394 | 515 | 515 |
| ANKRA2    | 0.053485 | 0.225631 | 0.33651  | 515 | 515 |
| C1QTNF3   | 0.05349  | 0.225587 | 0.336496 | 515 | 515 |
| EXOC3L2   | 0.053517 | 0.225356 | 0.336251 | 515 | 515 |
| ANXA4     | 0.053532 | 0.225221 | 0.336143 | 515 | 515 |
| OR52K1    | 0.053537 | 0.225184 | 0.336119 | 515 | 26  |
| HOPX      | 0.053552 | 0.22505  | 0.335945 | 515 | 515 |
| FAM21B    | 0.053562 | 0.224963 | 0.33584  | 515 | 515 |
| ZNF71     | 0.053562 | 0.224963 | 0.33584  | 515 | 515 |
| C12orf48  | 0.053564 | 0.224945 | 0.33584  | 515 | 515 |
| LRRC19    | 0.053585 | 0.224765 | 0.335619 | 515 | 461 |
| OR7D4     | 0.053601 | 0.224624 | 0.335459 | 515 | 7   |
| LRRC46    | 0.053639 | 0.224294 | 0.335066 | 515 | 515 |
| ZCCHC7    | 0.053648 | 0.224221 | 0.334983 | 515 | 515 |
| RPS15A    | 0.053676 | 0.223977 | 0.3347   | 515 | 515 |
| NDRG4     | 0.053729 | 0.223521 | 0.334162 | 515 | 515 |
| EBF2      | 0.053755 | 0.223296 | 0.33385  | 515 | 480 |
| FAM21C    | 0.053766 | 0.223197 | 0.333727 | 515 | 515 |
| LOC550643 | 0.053779 | 0.22309  | 0.333591 | 515 | 515 |
| C6orf164  | 0.053807 | 0.222851 | 0.333292 | 515 | 514 |
| LOC285370 | 0.053813 | 0.222797 | 0.333253 | 515 | 8   |
| ZNF280C   | 0.053813 | 0.222794 | 0.333253 | 515 | 515 |
| LOC400657 | 0.053817 | 0.222761 | 0.333249 | 515 | 515 |
| EXT1      | 0.05383  | 0.22265  | 0.333183 | 515 | 515 |
| CENPN     | 0.053836 | 0.222596 | 0.333128 | 515 | 515 |
| FAM66D    | 0.053847 | 0.222506 | 0.333018 | 515 | 470 |
| DLL4      | 0.053864 | 0.22236  | 0.332849 | 515 | 515 |
| BET1      | 0.053866 | 0.222337 | 0.33284  | 515 | 515 |
| NAT8      | 0.053906 | 0.221999 | 0.332425 | 515 | 352 |
| HBS1L     | 0.053935 | 0.221746 | 0.33213  | 515 | 515 |
| RRM2      | 0.053954 | 0.221586 | 0.331914 | 515 | 515 |
| PIGL      | 0.054016 | 0.221053 | 0.331215 | 515 | 515 |
| RAPGEF5   | 0.054029 | 0.220945 | 0.331079 | 515 | 515 |
| SRD5A2    | 0.054034 | 0.220901 | 0.331062 | 515 | 483 |
| ANKRD28   | 0.054042 | 0.22083  | 0.33103  | 515 | 515 |
| PISD      | 0.054052 | 0.220748 | 0.330981 | 515 | 515 |
| OR52B6    | 0.054077 | 0.220531 | 0.33068  | 515 | 90  |
| EPM2AIP1  | 0.054077 | 0.220531 | 0.33068  | 515 | 515 |
| LRRC10    | 0.054077 | 0.22053  | 0.33068  | 515 | 21  |
| UBA2      | 0.054095 | 0.220377 | 0.330524 | 515 | 515 |
| EZH1      | 0.054122 | 0.220151 | 0.330259 | 515 | 515 |
| NTSR1     | 0.054133 | 0.22005  | 0.330133 | 515 | 438 |
| N6AMT1    | 0.054144 | 0.219956 | 0.330017 | 515 | 515 |

|           |          |          |          |     |     |
|-----------|----------|----------|----------|-----|-----|
| ABCA3     | 0.054148 | 0.219928 | 0.330017 | 515 | 515 |
| LATS2     | 0.054164 | 0.219786 | 0.329885 | 515 | 515 |
| VGLL1     | 0.054169 | 0.219743 | 0.329845 | 515 | 481 |
| EHD2      | 0.054177 | 0.219674 | 0.329791 | 515 | 515 |
| MAP2K6    | 0.054178 | 0.219668 | 0.329791 | 515 | 515 |
| ALAS2     | 0.054247 | 0.219082 | 0.329027 | 515 | 350 |
| SPC25     | 0.054269 | 0.218896 | 0.328772 | 515 | 515 |
| VPS33A    | 0.054294 | 0.218686 | 0.32848  | 515 | 515 |
| EFCAB7    | 0.054298 | 0.218648 | 0.328448 | 515 | 515 |
| RBM5      | 0.054312 | 0.218529 | 0.328319 | 515 | 515 |
| LOC284100 | 0.054325 | 0.218417 | 0.328175 | 515 | 447 |
| C9orf170  | 0.054352 | 0.218192 | 0.327862 | 515 | 307 |
| CNNM1     | 0.054403 | 0.217756 | 0.327256 | 515 | 497 |
| TMPRSS11E | 0.054445 | 0.217406 | 0.326828 | 515 | 25  |
| CXorf50B  | 0.05445  | 0.217357 | 0.326804 | 515 | 506 |
| ODF2L     | 0.054451 | 0.217348 | 0.326804 | 515 | 515 |
| TMEM42    | 0.054465 | 0.217233 | 0.326691 | 515 | 515 |
| CCDC144A  | 0.054468 | 0.217203 | 0.326671 | 515 | 500 |
| APPL1     | 0.054472 | 0.217172 | 0.326649 | 515 | 515 |
| DCUN1D1   | 0.054534 | 0.216646 | 0.325931 | 515 | 515 |
| CYP4X1    | 0.054561 | 0.216425 | 0.325648 | 515 | 515 |
| LRRC31    | 0.054569 | 0.216354 | 0.325566 | 515 | 497 |
| CLPS      | 0.05457  | 0.216348 | 0.325566 | 515 | 98  |
| CITED2    | 0.054595 | 0.216139 | 0.325389 | 515 | 515 |
| BCL7B     | 0.054602 | 0.216078 | 0.325322 | 515 | 515 |
| PAR5      | 0.054604 | 0.216063 | 0.325322 | 515 | 506 |
| TRIM78P   | 0.054608 | 0.216023 | 0.325288 | 515 | 509 |
| ANXA7     | 0.054616 | 0.21596  | 0.325217 | 515 | 515 |
| HSD17B11  | 0.054637 | 0.215784 | 0.325004 | 515 | 515 |
| NCRNA0011 | 0.05466  | 0.215585 | 0.324824 | 515 | 335 |
| SNORA18   | 0.054662 | 0.215574 | 0.324824 | 515 | 182 |
| TRMT11    | 0.054681 | 0.215409 | 0.324633 | 515 | 515 |
| SLC30A1   | 0.054722 | 0.215066 | 0.324164 | 515 | 515 |
| FAM74A1   | 0.054812 | 0.21431  | 0.32317  | 515 | 68  |
| C2orf71   | 0.054825 | 0.214202 | 0.323057 | 515 | 358 |
| PON3      | 0.054829 | 0.214172 | 0.323036 | 515 | 515 |
| PPIEL     | 0.054837 | 0.214105 | 0.322983 | 515 | 515 |
| LOC550112 | 0.054879 | 0.213754 | 0.32262  | 515 | 515 |
| TAS1R3    | 0.054881 | 0.213738 | 0.32262  | 515 | 515 |
| MGAM      | 0.054926 | 0.213358 | 0.322099 | 515 | 504 |
| C12orf71  | 0.05494  | 0.213241 | 0.321997 | 515 | 358 |
| RAI14     | 0.054958 | 0.213092 | 0.321844 | 515 | 515 |
| SFXN1     | 0.054993 | 0.212801 | 0.321476 | 515 | 515 |
| LUZP2     | 0.055025 | 0.212532 | 0.321096 | 515 | 471 |
| STRN      | 0.055053 | 0.212297 | 0.320838 | 515 | 515 |
| MPP2      | 0.055056 | 0.21228  | 0.320835 | 515 | 515 |
| RPS23     | 0.055073 | 0.212134 | 0.320664 | 515 | 515 |
| FAM108A1  | 0.055099 | 0.211918 | 0.32041  | 515 | 515 |
| SNORD94   | 0.055149 | 0.211502 | 0.319854 | 515 | 137 |
| GSTCD     | 0.055182 | 0.211229 | 0.319512 | 515 | 515 |
| RNF4      | 0.055207 | 0.211021 | 0.319259 | 515 | 515 |
| RAD18     | 0.055207 | 0.21102  | 0.319259 | 515 | 515 |
| HOMER2    | 0.055215 | 0.21096  | 0.319227 | 515 | 515 |
| TUBGCP6   | 0.05524  | 0.210749 | 0.318941 | 515 | 515 |



|           |          |          |          |     |     |
|-----------|----------|----------|----------|-----|-----|
| AFF1      | 0.05525  | 0.210667 | 0.318855 | 515 | 515 |
| TCTEX1D4  | 0.055263 | 0.210559 | 0.318716 | 515 | 497 |
| EFCAB4B   | 0.055279 | 0.210432 | 0.318596 | 515 | 514 |
| GCG       | 0.055329 | 0.210014 | 0.318036 | 515 | 88  |
| KLK7      | 0.055334 | 0.209976 | 0.318003 | 515 | 438 |
| ACAA1     | 0.055337 | 0.209948 | 0.317984 | 515 | 515 |
| PSMD13    | 0.055388 | 0.20953  | 0.317448 | 515 | 515 |
| EBF3      | 0.055407 | 0.209368 | 0.31725  | 515 | 487 |
| FGF8      | 0.055434 | 0.209152 | 0.316994 | 515 | 326 |
| NXF2      | 0.055442 | 0.209083 | 0.316947 | 515 | 218 |
| PDE4C     | 0.055489 | 0.208697 | 0.316449 | 515 | 515 |
| GRAMD3    | 0.055498 | 0.208624 | 0.316387 | 515 | 515 |
| CAT       | 0.055516 | 0.20848  | 0.316192 | 515 | 515 |
| CT45A5    | 0.055525 | 0.208399 | 0.316094 | 515 | 132 |
| C16orf74  | 0.055533 | 0.20834  | 0.316028 | 515 | 515 |
| PARL      | 0.055556 | 0.20815  | 0.315763 | 515 | 515 |
| THOC7     | 0.055562 | 0.208098 | 0.315708 | 515 | 515 |
| RFXAP     | 0.055574 | 0.208001 | 0.31561  | 515 | 515 |
| LDHAL6B   | 0.055578 | 0.207964 | 0.315601 | 515 | 462 |
| CHKB-CPT1 | 0.055581 | 0.207939 | 0.315588 | 515 | 515 |
| SERPINB4  | 0.055589 | 0.207879 | 0.315521 | 515 | 372 |
| C9orf144  | 0.055605 | 0.207743 | 0.315338 | 515 | 91  |
| ZXDA      | 0.055631 | 0.207535 | 0.315047 | 515 | 515 |
| TKTL2     | 0.055643 | 0.207431 | 0.314937 | 515 | 266 |
| RPL10     | 0.055654 | 0.207346 | 0.314854 | 515 | 515 |
| HINT1     | 0.055686 | 0.207082 | 0.314502 | 515 | 515 |
| USP33     | 0.05569  | 0.207047 | 0.314473 | 515 | 515 |
| MATR3     | 0.055728 | 0.206737 | 0.314073 | 515 | 515 |
| FAM83B    | 0.055734 | 0.206691 | 0.314028 | 515 | 459 |
| CLP1      | 0.055754 | 0.206528 | 0.313828 | 515 | 515 |
| OVCH2     | 0.055757 | 0.206507 | 0.313818 | 515 | 274 |
| MAT2A     | 0.055816 | 0.206027 | 0.313208 | 515 | 515 |
| OR5K1     | 0.055821 | 0.20598  | 0.313162 | 515 | 102 |
| CRMP1     | 0.055824 | 0.205955 | 0.313162 | 515 | 515 |
| UBE2C     | 0.055826 | 0.205945 | 0.313162 | 515 | 515 |
| TMEM163   | 0.055849 | 0.205753 | 0.312946 | 515 | 515 |
| NCAM1     | 0.05594  | 0.205015 | 0.312026 | 515 | 515 |
| CTDSPL2   | 0.055944 | 0.204984 | 0.312026 | 515 | 515 |
| MANEAL    | 0.055952 | 0.204922 | 0.311956 | 515 | 515 |
| LOC283174 | 0.055958 | 0.204869 | 0.311898 | 515 | 515 |
| MRGPRD    | 0.055973 | 0.204751 | 0.311768 | 515 | 100 |
| C16orf78  | 0.055973 | 0.204749 | 0.311768 | 515 | 19  |
| GDF7      | 0.055978 | 0.204712 | 0.311755 | 515 | 302 |
| CRADD     | 0.056018 | 0.204387 | 0.311331 | 515 | 515 |
| PLA2G2F   | 0.05603  | 0.204284 | 0.311222 | 515 | 329 |
| BTNL9     | 0.056036 | 0.204241 | 0.31118  | 515 | 515 |
| RBM41     | 0.056037 | 0.204234 | 0.31118  | 515 | 515 |
| SOX18     | 0.056056 | 0.204075 | 0.310975 | 515 | 515 |
| STAG1     | 0.056132 | 0.203461 | 0.310134 | 515 | 515 |
| CNPY4     | 0.056196 | 0.202947 | 0.309445 | 515 | 515 |
| ASPHD1    | 0.056239 | 0.202606 | 0.309018 | 515 | 514 |
| CCDC74B   | 0.056242 | 0.20258  | 0.309018 | 515 | 514 |
| FABP12    | 0.05625  | 0.202513 | 0.308947 | 515 | 33  |
| CLSPN     | 0.056317 | 0.201977 | 0.308153 | 515 | 515 |

|           |          |          |          |     |     |
|-----------|----------|----------|----------|-----|-----|
| UQCRFS1   | 0.056392 | 0.201376 | 0.30733  | 515 | 515 |
| RACGAP1   | 0.056423 | 0.201126 | 0.307006 | 515 | 515 |
| KIAA0802  | 0.056471 | 0.200741 | 0.306548 | 515 | 515 |
| GOLG8A    | 0.056474 | 0.200721 | 0.306541 | 515 | 515 |
| PARP4     | 0.056495 | 0.20055  | 0.306303 | 515 | 515 |
| PDCD2     | 0.056504 | 0.200482 | 0.306246 | 515 | 515 |
| KRT6A     | 0.056513 | 0.200408 | 0.306157 | 515 | 501 |
| CACNA1F   | 0.056549 | 0.200123 | 0.305745 | 515 | 510 |
| OR2S2     | 0.05658  | 0.199872 | 0.305408 | 515 | 44  |
| LIPM      | 0.056583 | 0.199848 | 0.305395 | 515 | 25  |
| TNMD      | 0.056583 | 0.199847 | 0.305395 | 515 | 213 |
| ASMTL     | 0.056597 | 0.199734 | 0.305268 | 515 | 515 |
| PRPS2     | 0.056607 | 0.199662 | 0.305203 | 515 | 515 |
| MYO1H     | 0.056694 | 0.198967 | 0.304305 | 515 | 498 |
| RIF1      | 0.056702 | 0.1989   | 0.304226 | 515 | 515 |
| HSPA14    | 0.056719 | 0.198767 | 0.304092 | 515 | 515 |
| KIAA1715  | 0.056723 | 0.19874  | 0.304074 | 515 | 515 |
| PGLYRP4   | 0.056729 | 0.198694 | 0.304026 | 515 | 476 |
| UNC80     | 0.056741 | 0.198597 | 0.303901 | 515 | 457 |
| MTERFD1   | 0.05676  | 0.198445 | 0.303692 | 515 | 515 |
| LPHN2     | 0.056761 | 0.198435 | 0.303692 | 515 | 515 |
| MSTN      | 0.05677  | 0.198364 | 0.303614 | 515 | 465 |
| NUP37     | 0.056783 | 0.198263 | 0.303502 | 515 | 515 |
| E2F7      | 0.056806 | 0.198082 | 0.303323 | 515 | 515 |
| DTNBP1    | 0.05681  | 0.198051 | 0.303299 | 515 | 515 |
| THAP2     | 0.05682  | 0.197972 | 0.303212 | 515 | 515 |
| TBC1D5    | 0.056848 | 0.197751 | 0.302931 | 515 | 515 |
| SERPINA10 | 0.056891 | 0.19741  | 0.302432 | 515 | 236 |
| KBTBD5    | 0.056894 | 0.197388 | 0.302422 | 515 | 96  |
| RG9MTD3   | 0.056902 | 0.197321 | 0.302342 | 515 | 515 |
| BDP1      | 0.056919 | 0.197184 | 0.302156 | 515 | 515 |
| SKP1      | 0.05692  | 0.197184 | 0.302156 | 515 | 515 |
| SNX9      | 0.056944 | 0.196995 | 0.301934 | 515 | 515 |
| PTGER3    | 0.05695  | 0.196945 | 0.301882 | 515 | 515 |
| MAK       | 0.056976 | 0.19674  | 0.30159  | 515 | 515 |
| KIF18A    | 0.056994 | 0.196597 | 0.301418 | 515 | 515 |
| NPTN      | 0.057012 | 0.196456 | 0.301224 | 515 | 515 |
| FFAR1     | 0.057024 | 0.196365 | 0.301108 | 515 | 101 |
| OLFML2A   | 0.057024 | 0.196362 | 0.301108 | 515 | 515 |
| PRR25     | 0.057045 | 0.196199 | 0.300968 | 515 | 99  |
| NCAPG     | 0.057053 | 0.196138 | 0.300898 | 515 | 515 |
| A1BG      | 0.057054 | 0.196127 | 0.300898 | 515 | 515 |
| KRT85     | 0.057076 | 0.195954 | 0.300686 | 515 | 160 |
| APBA1     | 0.057093 | 0.195817 | 0.300522 | 515 | 515 |
| KRTAP10-3 | 0.057099 | 0.195771 | 0.300497 | 515 | 14  |
| HOXD4     | 0.057119 | 0.195612 | 0.300276 | 515 | 462 |
| LOC100131 | 0.05716  | 0.195293 | 0.299924 | 515 | 487 |
| OR5B2     | 0.057165 | 0.195257 | 0.299893 | 515 | 44  |
| PITX1     | 0.057175 | 0.195176 | 0.299791 | 515 | 510 |
| MTCP1     | 0.057179 | 0.195144 | 0.299765 | 515 | 515 |
| SFRS12IP1 | 0.057181 | 0.19513  | 0.299765 | 515 | 515 |
| TXNDC9    | 0.057209 | 0.194914 | 0.299457 | 515 | 515 |
| HECTD2    | 0.05721  | 0.194905 | 0.299457 | 515 | 515 |
| TMEM192   | 0.057211 | 0.194895 | 0.299457 | 515 | 515 |

|           |          |          |          |     |     |
|-----------|----------|----------|----------|-----|-----|
| BMX       | 0.057214 | 0.194871 | 0.299457 | 515 | 508 |
| PLAA      | 0.057217 | 0.194852 | 0.299455 | 515 | 515 |
| DCAF5     | 0.057256 | 0.194542 | 0.299023 | 515 | 515 |
| THBS3     | 0.057263 | 0.194486 | 0.298961 | 515 | 515 |
| NMBR      | 0.057267 | 0.194455 | 0.298936 | 515 | 245 |
| PJA1      | 0.057301 | 0.194194 | 0.298558 | 515 | 515 |
| PCDHB10   | 0.057307 | 0.19415  | 0.298514 | 515 | 515 |
| SNHG12    | 0.057315 | 0.194081 | 0.29843  | 515 | 515 |
| POLR3G    | 0.057389 | 0.193509 | 0.297643 | 515 | 515 |
| CILP2     | 0.057401 | 0.193415 | 0.297521 | 515 | 515 |
| SLC5A1    | 0.057414 | 0.19331  | 0.297428 | 515 | 493 |
| LOC729020 | 0.05742  | 0.193265 | 0.297404 | 515 | 515 |
| RAB11FIP4 | 0.057448 | 0.193053 | 0.297123 | 515 | 515 |
| CELA2A    | 0.05745  | 0.193035 | 0.297118 | 515 | 57  |
| LMBRD2    | 0.057453 | 0.193013 | 0.297118 | 515 | 515 |
| FICD      | 0.057488 | 0.192738 | 0.296754 | 515 | 515 |
| HBE1      | 0.057514 | 0.192538 | 0.296468 | 515 | 262 |
| C12orf74  | 0.057531 | 0.192408 | 0.296313 | 515 | 488 |
| POC1B     | 0.057544 | 0.192308 | 0.296183 | 515 | 515 |
| RNASEH1   | 0.057561 | 0.192174 | 0.295999 | 515 | 515 |
| SNAPC2    | 0.057591 | 0.191945 | 0.295686 | 515 | 515 |
| OR2G6     | 0.057625 | 0.191681 | 0.295353 | 515 | 12  |
| SLC27A6   | 0.057666 | 0.191362 | 0.294885 | 515 | 349 |
| KRT3      | 0.057671 | 0.191327 | 0.294853 | 515 | 326 |
| SCUBE3    | 0.057676 | 0.191289 | 0.294817 | 515 | 514 |
| SLC22A11  | 0.057755 | 0.190678 | 0.293966 | 515 | 376 |
| EXOC6     | 0.057761 | 0.19063  | 0.293915 | 515 | 515 |
| LOC151162 | 0.057779 | 0.19049  | 0.293743 | 515 | 515 |
| EIF4E     | 0.057792 | 0.19039  | 0.293613 | 515 | 515 |
| C7orf40   | 0.05781  | 0.190257 | 0.293453 | 515 | 515 |
| LOC650368 | 0.057825 | 0.190136 | 0.293357 | 515 | 515 |
| SNX7      | 0.057832 | 0.19009  | 0.293308 | 515 | 515 |
| PRKD1     | 0.057834 | 0.190068 | 0.293297 | 515 | 515 |
| GPR20     | 0.057851 | 0.189943 | 0.293128 | 515 | 500 |
| PEBP4     | 0.057857 | 0.189893 | 0.293073 | 515 | 504 |
| EN2       | 0.057866 | 0.189828 | 0.293017 | 515 | 402 |
| DSCR9     | 0.057871 | 0.189785 | 0.292973 | 515 | 476 |
| ARL13A    | 0.057875 | 0.189753 | 0.29297  | 515 | 342 |
| SOBP      | 0.057884 | 0.189684 | 0.292904 | 515 | 515 |
| SCARNA6   | 0.057889 | 0.189652 | 0.292881 | 515 | 401 |
| YBX1      | 0.05789  | 0.189645 | 0.292881 | 515 | 515 |
| KIF27     | 0.057906 | 0.189519 | 0.292767 | 515 | 515 |
| ARHGAP26  | 0.057926 | 0.189363 | 0.292571 | 515 | 515 |
| SERPIN3   | 0.057953 | 0.189159 | 0.292323 | 515 | 413 |
| OR51I2    | 0.057968 | 0.189046 | 0.292171 | 515 | 32  |
| GDPD5     | 0.057984 | 0.188919 | 0.291997 | 515 | 515 |
| LOC100101 | 0.05801  | 0.188721 | 0.291737 | 515 | 116 |
| C15orf2   | 0.058061 | 0.188335 | 0.291321 | 515 | 186 |
| PHYHD1    | 0.058063 | 0.188319 | 0.291318 | 515 | 515 |
| CPB1      | 0.058081 | 0.18818  | 0.291149 | 515 | 346 |
| AFF3      | 0.058144 | 0.187702 | 0.290536 | 515 | 515 |
| THUMPD1   | 0.058154 | 0.187625 | 0.290447 | 515 | 515 |
| OPALIN    | 0.058156 | 0.187609 | 0.290444 | 515 | 38  |
| DSC3      | 0.058174 | 0.187474 | 0.290281 | 515 | 494 |

|           |          |          |          |     |     |
|-----------|----------|----------|----------|-----|-----|
| SLC25A42  | 0.058183 | 0.187404 | 0.290225 | 515 | 515 |
| PRSS33    | 0.058196 | 0.187307 | 0.290112 | 515 | 263 |
| CISD2     | 0.058211 | 0.187193 | 0.28998  | 515 | 515 |
| LOC391322 | 0.058238 | 0.186991 | 0.289689 | 515 | 421 |
| C17orf103 | 0.058242 | 0.18696  | 0.289663 | 515 | 515 |
| FAM25A    | 0.058317 | 0.186393 | 0.288852 | 515 | 104 |
| IQUB      | 0.058362 | 0.186051 | 0.288368 | 515 | 513 |
| C8orf79   | 0.058364 | 0.186037 | 0.288368 | 515 | 515 |
| PSMB2     | 0.058397 | 0.185788 | 0.288005 | 515 | 515 |
| EFCAB5    | 0.058401 | 0.185759 | 0.287982 | 515 | 493 |
| ZNF559    | 0.058454 | 0.18536  | 0.287452 | 515 | 515 |
| ASPRV1    | 0.058457 | 0.185337 | 0.28744  | 515 | 515 |
| TBC1D10A  | 0.058475 | 0.185197 | 0.287245 | 515 | 515 |
| TMEM138   | 0.058534 | 0.184752 | 0.286711 | 515 | 515 |
| RABEPK    | 0.058543 | 0.184685 | 0.286627 | 515 | 515 |
| SLC7A5P2  | 0.058603 | 0.184237 | 0.286132 | 515 | 494 |
| C12orf49  | 0.058609 | 0.184192 | 0.286084 | 515 | 515 |
| ZNF684    | 0.058662 | 0.183792 | 0.285575 | 515 | 515 |
| ANKFY1    | 0.058677 | 0.18368  | 0.285467 | 515 | 515 |
| CEP192    | 0.058701 | 0.183502 | 0.285234 | 515 | 515 |
| UBR2      | 0.05872  | 0.183359 | 0.285101 | 515 | 515 |
| LOC153328 | 0.058729 | 0.183292 | 0.285019 | 515 | 305 |
| SLC35A1   | 0.058732 | 0.183274 | 0.285014 | 515 | 515 |
| STAG2     | 0.058733 | 0.183267 | 0.285014 | 515 | 515 |
| ZNF287    | 0.058776 | 0.18294  | 0.284628 | 515 | 515 |
| FAM76B    | 0.058777 | 0.182933 | 0.284628 | 515 | 515 |
| UBE2N     | 0.058829 | 0.182549 | 0.284173 | 515 | 515 |
| CCDC94    | 0.058831 | 0.182533 | 0.284171 | 515 | 515 |
| MND1      | 0.058833 | 0.182515 | 0.284164 | 515 | 515 |
| OR5P2     | 0.058838 | 0.182481 | 0.284156 | 515 | 40  |
| SCARNA10  | 0.058891 | 0.182083 | 0.28365  | 515 | 436 |
| CCDC148   | 0.058905 | 0.181979 | 0.283552 | 515 | 510 |
| NBPF9     | 0.058914 | 0.181916 | 0.283476 | 515 | 515 |
| FAM13AOS  | 0.058916 | 0.1819   | 0.283472 | 515 | 515 |
| LOC285074 | 0.059    | 0.181277 | 0.282589 | 515 | 515 |
| DNAH10    | 0.059021 | 0.18112  | 0.282398 | 515 | 515 |
| NR6A1     | 0.059043 | 0.180955 | 0.282198 | 515 | 512 |
| BRCA1     | 0.059045 | 0.180946 | 0.282198 | 515 | 515 |
| ZNF608    | 0.059079 | 0.18069  | 0.281872 | 515 | 515 |
| BMP10     | 0.05908  | 0.180682 | 0.281872 | 515 | 51  |
| TMC3      | 0.059093 | 0.180589 | 0.281759 | 515 | 358 |
| ZNF571    | 0.05915  | 0.180168 | 0.281256 | 515 | 515 |
| IFNA2     | 0.059167 | 0.180042 | 0.281103 | 515 | 6   |
| XPA       | 0.059174 | 0.17999  | 0.281043 | 515 | 515 |
| PLXNB3    | 0.059184 | 0.179916 | 0.280972 | 515 | 514 |
| SPINK2    | 0.059208 | 0.179744 | 0.280741 | 515 | 484 |
| SGOL1     | 0.059218 | 0.179668 | 0.280669 | 515 | 515 |
| FER1L5    | 0.059253 | 0.179411 | 0.280336 | 515 | 463 |
| C18orf62  | 0.059263 | 0.179337 | 0.280265 | 515 | 51  |
| TMCO2     | 0.059269 | 0.179289 | 0.280233 | 515 | 164 |
| PTPRM     | 0.059292 | 0.179125 | 0.280043 | 515 | 515 |
| ZNF75D    | 0.0593   | 0.179063 | 0.280012 | 515 | 515 |
| PUS10     | 0.059303 | 0.179044 | 0.280004 | 515 | 515 |
| SCYL2     | 0.059315 | 0.178952 | 0.279882 | 515 | 515 |

|           |          |          |          |     |     |
|-----------|----------|----------|----------|-----|-----|
| COL12A1   | 0.059317 | 0.178939 | 0.279882 | 515 | 515 |
| TMEM30A   | 0.05934  | 0.178773 | 0.279646 | 515 | 515 |
| RPE       | 0.059346 | 0.178724 | 0.279591 | 515 | 515 |
| LGR6      | 0.059351 | 0.178692 | 0.279564 | 515 | 515 |
| DGKB      | 0.059353 | 0.178678 | 0.279563 | 515 | 411 |
| HEMK1     | 0.059367 | 0.178575 | 0.279424 | 515 | 515 |
| MPND      | 0.05937  | 0.178547 | 0.279401 | 515 | 515 |
| CCDC14    | 0.059383 | 0.178454 | 0.279336 | 515 | 515 |
| ST6GALNAC | 0.059391 | 0.178398 | 0.279292 | 515 | 515 |
| ALDOC     | 0.059419 | 0.17819  | 0.279039 | 515 | 515 |
| BCAS2     | 0.059432 | 0.178097 | 0.278982 | 515 | 515 |
| STX8      | 0.059483 | 0.177721 | 0.27849  | 515 | 515 |
| SIPA1L1   | 0.059493 | 0.177652 | 0.278416 | 515 | 515 |
| HAPLN4    | 0.059518 | 0.177469 | 0.278237 | 515 | 498 |
| UROD      | 0.059522 | 0.177439 | 0.278212 | 515 | 515 |
| KIAA1407  | 0.059525 | 0.177418 | 0.278201 | 515 | 515 |
| IFNE      | 0.059529 | 0.177389 | 0.278178 | 515 | 332 |
| HARBI1    | 0.059536 | 0.177336 | 0.278139 | 515 | 515 |
| UCP3      | 0.059542 | 0.177293 | 0.278097 | 515 | 514 |
| SPATA19   | 0.059561 | 0.177157 | 0.277924 | 515 | 26  |
| CSTF2T    | 0.059566 | 0.17712  | 0.277909 | 515 | 515 |
| SLC17A9   | 0.059598 | 0.176882 | 0.277579 | 515 | 515 |
| PPP4R2    | 0.059613 | 0.176777 | 0.277436 | 515 | 515 |
| ZNF138    | 0.05963  | 0.17665  | 0.277258 | 515 | 515 |
| VHLL      | 0.059686 | 0.176244 | 0.27673  | 515 | 116 |
| TRIM31    | 0.059716 | 0.176025 | 0.276472 | 515 | 509 |
| SNORA78   | 0.059723 | 0.17598  | 0.276423 | 515 | 7   |
| MUDENG    | 0.059744 | 0.175827 | 0.276205 | 515 | 515 |
| LIMK2     | 0.059749 | 0.175787 | 0.276164 | 515 | 515 |
| NCBP1     | 0.059759 | 0.175715 | 0.276072 | 515 | 515 |
| MCART3P   | 0.059769 | 0.175646 | 0.275985 | 515 | 316 |
| EIF4E2    | 0.059774 | 0.175608 | 0.275948 | 515 | 515 |
| BRMS1L    | 0.059812 | 0.175336 | 0.275541 | 515 | 515 |
| ZNF41     | 0.059829 | 0.175211 | 0.275366 | 515 | 515 |
| RNH1      | 0.059868 | 0.174925 | 0.274961 | 515 | 515 |
| TRIM58    | 0.059888 | 0.174785 | 0.274784 | 515 | 508 |
| STXBP2    | 0.059905 | 0.174662 | 0.274613 | 515 | 515 |
| APC       | 0.059967 | 0.174215 | 0.273952 | 515 | 515 |
| DEDD2     | 0.059968 | 0.17421  | 0.273952 | 515 | 515 |
| AKR1D1    | 0.05998  | 0.17412  | 0.273847 | 515 | 254 |
| ROB02     | 0.060002 | 0.173966 | 0.273625 | 515 | 513 |
| UPP2      | 0.060012 | 0.173893 | 0.273532 | 515 | 326 |
| FAM75C1   | 0.06002  | 0.173837 | 0.273466 | 515 | 167 |
| LOC374491 | 0.060061 | 0.173542 | 0.273088 | 515 | 441 |
| MTMR11    | 0.060077 | 0.173428 | 0.272952 | 515 | 515 |
| ZNF268    | 0.060096 | 0.173289 | 0.272754 | 515 | 515 |
| MLLT10    | 0.060113 | 0.173169 | 0.272586 | 515 | 515 |
| PPIL6     | 0.06017  | 0.172761 | 0.271987 | 515 | 515 |
| MFSD7     | 0.060188 | 0.17263  | 0.271823 | 515 | 515 |
| WDR85     | 0.060196 | 0.17257  | 0.27175  | 515 | 515 |
| COMP      | 0.060214 | 0.172444 | 0.271595 | 515 | 513 |
| MTAP      | 0.060306 | 0.171789 | 0.27067  | 515 | 515 |
| C16orf45  | 0.060381 | 0.171254 | 0.269888 | 515 | 515 |
| RFX2      | 0.060382 | 0.171248 | 0.269888 | 515 | 515 |

|           |          |          |          |     |     |
|-----------|----------|----------|----------|-----|-----|
| VBP1      | 0.060387 | 0.171214 | 0.26987  | 515 | 515 |
| EYA3      | 0.060405 | 0.171085 | 0.269709 | 515 | 515 |
| TM2D2     | 0.060415 | 0.171014 | 0.269619 | 515 | 515 |
| CPA6      | 0.060476 | 0.17058  | 0.269028 | 515 | 460 |
| SRCRB4D   | 0.060478 | 0.170565 | 0.269028 | 515 | 515 |
| ZBTB7C    | 0.06048  | 0.17055  | 0.269028 | 515 | 515 |
| ZNF440    | 0.060525 | 0.170236 | 0.268625 | 515 | 515 |
| TXNDC16   | 0.060543 | 0.170105 | 0.268461 | 515 | 515 |
| GPR128    | 0.060595 | 0.169738 | 0.268052 | 515 | 210 |
| OR3A4     | 0.06062  | 0.169564 | 0.267819 | 515 | 10  |
| KIAA2026  | 0.060655 | 0.169314 | 0.267466 | 515 | 515 |
| FLT1      | 0.060673 | 0.169193 | 0.267296 | 515 | 515 |
| ORAI1     | 0.060697 | 0.169024 | 0.26705  | 515 | 515 |
| TRIM50    | 0.060697 | 0.169024 | 0.26705  | 515 | 434 |
| FAM135B   | 0.060713 | 0.168906 | 0.266905 | 515 | 412 |
| SNORA5C   | 0.060717 | 0.16888  | 0.266885 | 515 | 57  |
| LSM3      | 0.060739 | 0.168726 | 0.266706 | 515 | 515 |
| MIOS      | 0.060739 | 0.168724 | 0.266706 | 515 | 515 |
| IGF2BP3   | 0.060749 | 0.168658 | 0.266661 | 515 | 515 |
| NGF       | 0.06076  | 0.168577 | 0.266555 | 515 | 511 |
| SNORA52   | 0.060811 | 0.168218 | 0.266093 | 515 | 58  |
| EDN3      | 0.060815 | 0.168193 | 0.266077 | 515 | 293 |
| XPC       | 0.060827 | 0.168109 | 0.265983 | 515 | 515 |
| UBA5      | 0.060842 | 0.168005 | 0.26586  | 515 | 515 |
| TRADD     | 0.060845 | 0.16798  | 0.265842 | 515 | 515 |
| C15orf59  | 0.060851 | 0.16794  | 0.265821 | 515 | 512 |
| RIN1      | 0.060871 | 0.167801 | 0.265643 | 515 | 515 |
| OPCML     | 0.060894 | 0.167642 | 0.265433 | 515 | 487 |
| ERBB2IP   | 0.060976 | 0.167066 | 0.264668 | 515 | 515 |
| ARHGAP19  | 0.060989 | 0.166974 | 0.264543 | 515 | 515 |
| SNRNP40   | 0.061003 | 0.166877 | 0.264431 | 515 | 515 |
| CYP2A13   | 0.061015 | 0.166797 | 0.264347 | 515 | 249 |
| TAS2R50   | 0.061025 | 0.166729 | 0.264301 | 515 | 177 |
| ULBP3     | 0.061084 | 0.166314 | 0.263665 | 515 | 515 |
| NINJ2     | 0.061095 | 0.166242 | 0.263572 | 515 | 515 |
| ZNF429    | 0.061102 | 0.166191 | 0.263532 | 515 | 515 |
| LOC100287 | 0.061134 | 0.165966 | 0.263238 | 515 | 4   |
| DDIT4     | 0.061136 | 0.165955 | 0.263238 | 515 | 515 |
| KRTAP4-9  | 0.061136 | 0.165952 | 0.263238 | 515 | 49  |
| F10       | 0.061142 | 0.16591  | 0.263212 | 515 | 514 |
| C14orf86  | 0.061177 | 0.165671 | 0.262875 | 515 | 261 |
| OTC       | 0.061193 | 0.165559 | 0.262718 | 515 | 240 |
| LOC100128 | 0.061207 | 0.165465 | 0.262632 | 515 | 50  |
| C9orf89   | 0.061215 | 0.165409 | 0.262563 | 515 | 515 |
| C7orf42   | 0.06122  | 0.165373 | 0.262526 | 515 | 515 |
| LARP6     | 0.061305 | 0.164783 | 0.261673 | 515 | 515 |
| CG030     | 0.061325 | 0.164645 | 0.261475 | 515 | 515 |
| SEMA4F    | 0.061355 | 0.164443 | 0.261196 | 515 | 515 |
| CLSTN3    | 0.061385 | 0.164233 | 0.2609   | 515 | 515 |
| CP        | 0.061392 | 0.164185 | 0.260848 | 515 | 515 |
| C11orf86  | 0.061394 | 0.164174 | 0.260848 | 515 | 447 |
| MPHOSPH6  | 0.061416 | 0.164022 | 0.26063  | 515 | 515 |
| MYO1A     | 0.061428 | 0.163939 | 0.26054  | 515 | 488 |
| PMS2L3    | 0.061437 | 0.163874 | 0.260494 | 515 | 515 |

|          |          |          |          |     |     |
|----------|----------|----------|----------|-----|-----|
| GLYATL2  | 0.061468 | 0.163665 | 0.260209 | 515 | 373 |
| TAOK1    | 0.061473 | 0.163626 | 0.260187 | 515 | 515 |
| SNORA80  | 0.061498 | 0.163458 | 0.259962 | 515 | 16  |
| FAM190A  | 0.06152  | 0.163304 | 0.259778 | 515 | 512 |
| NIPAL3   | 0.061539 | 0.163173 | 0.259611 | 515 | 515 |
| LAMB2L   | 0.061591 | 0.162816 | 0.259086 | 515 | 515 |
| TSC22D4  | 0.06161  | 0.162692 | 0.258929 | 515 | 515 |
| C9orf122 | 0.061613 | 0.162668 | 0.258912 | 515 | 512 |
| C6orf58  | 0.06162  | 0.16262  | 0.258875 | 515 | 254 |
| C22orf24 | 0.061623 | 0.162603 | 0.25887  | 515 | 388 |
| FKBP1A   | 0.061679 | 0.162217 | 0.258358 | 515 | 515 |
| SYT8     | 0.06171  | 0.16201  | 0.25807  | 515 | 512 |
| PKN1     | 0.061713 | 0.161988 | 0.258055 | 515 | 515 |
| CCDC154  | 0.061741 | 0.161793 | 0.257786 | 515 | 495 |
| P2RX4    | 0.061851 | 0.161049 | 0.256784 | 515 | 515 |
| BID      | 0.061885 | 0.160819 | 0.256458 | 515 | 515 |
| QRICH2   | 0.061927 | 0.160531 | 0.256081 | 515 | 515 |
| CDCA2    | 0.061965 | 0.160279 | 0.255761 | 515 | 515 |
| SNORA11E | 0.062001 | 0.160033 | 0.255429 | 515 | 9   |
| TMEM199  | 0.062005 | 0.160005 | 0.255404 | 515 | 515 |
| CRYBG3   | 0.062021 | 0.1599   | 0.255277 | 515 | 515 |
| NUDT16P1 | 0.062031 | 0.159832 | 0.25519  | 515 | 515 |
| FRS2     | 0.062032 | 0.159825 | 0.25519  | 515 | 515 |
| TRIM56   | 0.062047 | 0.159722 | 0.255121 | 515 | 515 |
| MLLT6    | 0.062053 | 0.15968  | 0.25509  | 515 | 515 |
| CCDC93   | 0.062054 | 0.159673 | 0.25509  | 515 | 515 |
| OSR1     | 0.062061 | 0.15963  | 0.255064 | 515 | 515 |
| RBM16    | 0.062103 | 0.159349 | 0.254683 | 515 | 515 |
| TTC21A   | 0.062103 | 0.159346 | 0.254683 | 515 | 515 |
| LCE1C    | 0.062121 | 0.159224 | 0.254553 | 515 | 31  |
| PGAP1    | 0.062133 | 0.159142 | 0.254474 | 515 | 515 |
| CNOT10   | 0.062138 | 0.15911  | 0.254473 | 515 | 515 |
| SOX30    | 0.062146 | 0.159053 | 0.25443  | 515 | 499 |
| RBM20    | 0.062156 | 0.15899  | 0.254374 | 515 | 514 |
| ASB1     | 0.062186 | 0.158788 | 0.254072 | 515 | 515 |
| CKM      | 0.062188 | 0.158776 | 0.254072 | 515 | 502 |
| TOPBP1   | 0.062196 | 0.15872  | 0.254022 | 515 | 515 |
| IQCJ     | 0.062204 | 0.15867  | 0.253978 | 515 | 51  |
| NR2C2    | 0.062235 | 0.158462 | 0.253671 | 515 | 515 |
| AMOTL1   | 0.062257 | 0.158312 | 0.253463 | 515 | 515 |
| EIF2C3   | 0.062259 | 0.158297 | 0.253463 | 515 | 515 |
| OR6K3    | 0.062263 | 0.158274 | 0.253451 | 515 | 114 |
| JPH2     | 0.062277 | 0.158178 | 0.253318 | 515 | 515 |
| ZNF143   | 0.062294 | 0.158062 | 0.253152 | 515 | 515 |
| ANKLE1   | 0.062354 | 0.157666 | 0.252559 | 515 | 514 |
| MRPL50   | 0.062367 | 0.157578 | 0.252438 | 515 | 515 |
| FKTN     | 0.062379 | 0.157494 | 0.252344 | 515 | 515 |
| ATG10    | 0.062387 | 0.157444 | 0.252305 | 515 | 515 |
| LDHAL6A  | 0.062409 | 0.157299 | 0.252096 | 515 | 356 |
| FAM35B   | 0.06241  | 0.157287 | 0.252096 | 515 | 515 |
| MEPE     | 0.062465 | 0.156924 | 0.251623 | 515 | 363 |
| NOTCH4   | 0.062478 | 0.156836 | 0.251552 | 515 | 515 |
| GGT8P    | 0.06251  | 0.156623 | 0.251331 | 515 | 472 |
| C1orf183 | 0.062539 | 0.156435 | 0.251069 | 515 | 515 |

|           |          |          |          |     |     |
|-----------|----------|----------|----------|-----|-----|
| MTMR3     | 0.062543 | 0.156408 | 0.251047 | 515 | 515 |
| ACVR1     | 0.062552 | 0.156348 | 0.25097  | 515 | 515 |
| PATL1     | 0.062555 | 0.156324 | 0.250952 | 515 | 515 |
| C2orf73   | 0.062556 | 0.156321 | 0.250952 | 515 | 425 |
| ANKRD6    | 0.062584 | 0.156133 | 0.250685 | 515 | 515 |
| UCN2      | 0.062598 | 0.156038 | 0.250554 | 515 | 467 |
| RAB11FIP5 | 0.062609 | 0.15597  | 0.250485 | 515 | 515 |
| ZNF488    | 0.062637 | 0.155784 | 0.250247 | 515 | 488 |
| MGAT4C    | 0.062641 | 0.155753 | 0.250216 | 515 | 254 |
| FAM175B   | 0.062653 | 0.155679 | 0.250177 | 515 | 515 |
| RUFY2     | 0.062671 | 0.155555 | 0.250019 | 515 | 515 |
| NOTCH2NL  | 0.062703 | 0.155346 | 0.249703 | 515 | 515 |
| PRRG3     | 0.062706 | 0.155329 | 0.249695 | 515 | 407 |
| ZFC3H1    | 0.062762 | 0.154954 | 0.249134 | 515 | 515 |
| ASB11     | 0.062778 | 0.154851 | 0.248988 | 515 | 166 |
| GRP       | 0.06279  | 0.154775 | 0.248886 | 515 | 474 |
| KCNK10    | 0.062796 | 0.154735 | 0.248861 | 515 | 407 |
| PDE12     | 0.062801 | 0.154697 | 0.24882  | 515 | 515 |
| EAF1      | 0.062807 | 0.154663 | 0.248804 | 515 | 515 |
| UBXN7     | 0.062895 | 0.15408  | 0.247967 | 515 | 515 |
| ETNK2     | 0.062906 | 0.154013 | 0.247879 | 515 | 515 |
| TMEM35    | 0.062938 | 0.153803 | 0.247602 | 515 | 515 |
| NDUFA9    | 0.062966 | 0.153616 | 0.247321 | 515 | 515 |
| LANCL1    | 0.062972 | 0.153577 | 0.247277 | 515 | 515 |
| FLJ44054  | 0.062999 | 0.153401 | 0.247054 | 515 | 201 |
| ZNF880    | 0.062999 | 0.153399 | 0.247054 | 515 | 515 |
| TRIM66    | 0.063001 | 0.153389 | 0.247054 | 515 | 515 |
| FTSJD2    | 0.063015 | 0.153295 | 0.246962 | 515 | 515 |
| BCORL2    | 0.063023 | 0.153243 | 0.246918 | 515 | 229 |
| TMF1      | 0.063033 | 0.153177 | 0.246832 | 515 | 515 |
| TSKS      | 0.063073 | 0.15292  | 0.246457 | 515 | 454 |
| HECW1     | 0.063088 | 0.152817 | 0.246362 | 515 | 510 |
| GTF2H2    | 0.063094 | 0.152782 | 0.246334 | 515 | 515 |
| ARHGAP42  | 0.063141 | 0.152474 | 0.245877 | 515 | 515 |
| DPY19L2   | 0.063189 | 0.152164 | 0.245436 | 515 | 511 |
| EPDR1     | 0.063191 | 0.152152 | 0.245436 | 515 | 515 |
| C17orf108 | 0.063215 | 0.151996 | 0.245285 | 515 | 515 |
| C10orf81  | 0.063226 | 0.151923 | 0.245259 | 515 | 512 |
| YWHAB     | 0.063246 | 0.151791 | 0.245152 | 515 | 515 |
| CCDC153   | 0.063255 | 0.151735 | 0.245082 | 515 | 514 |
| SARM1     | 0.063262 | 0.15169  | 0.245068 | 515 | 515 |
| BCAR3     | 0.06329  | 0.151507 | 0.244808 | 515 | 515 |
| SPATA16   | 0.063317 | 0.151332 | 0.244569 | 515 | 57  |
| SERAC1    | 0.063323 | 0.151294 | 0.244527 | 515 | 515 |
| ASB5      | 0.063359 | 0.151062 | 0.244251 | 515 | 305 |
| TMBIM4    | 0.063368 | 0.151005 | 0.244194 | 515 | 515 |
| MYB       | 0.06337  | 0.150987 | 0.244194 | 515 | 515 |
| PYG01     | 0.063391 | 0.150856 | 0.244036 | 515 | 509 |
| OR2T10    | 0.063495 | 0.150181 | 0.243063 | 515 | 36  |
| GALNT1    | 0.063518 | 0.150036 | 0.242867 | 515 | 515 |
| CST5      | 0.063526 | 0.149987 | 0.242807 | 515 | 437 |
| ZFP91     | 0.063527 | 0.149981 | 0.242807 | 515 | 515 |
| MATN1     | 0.063543 | 0.149873 | 0.242661 | 515 | 444 |
| PNMAL1    | 0.063659 | 0.14913  | 0.241634 | 515 | 515 |



|           |          |          |          |     |     |
|-----------|----------|----------|----------|-----|-----|
| ZHX1      | 0.06366  | 0.149124 | 0.241634 | 515 | 515 |
| SLC10A6   | 0.063752 | 0.14854  | 0.240777 | 515 | 463 |
| OR4D6     | 0.063761 | 0.148482 | 0.240703 | 515 | 22  |
| CWC25     | 0.063766 | 0.148448 | 0.240667 | 515 | 515 |
| ABHD15    | 0.063829 | 0.148048 | 0.240115 | 515 | 515 |
| ZNF780A   | 0.063851 | 0.147909 | 0.23993  | 515 | 515 |
| CYP2C9    | 0.06387  | 0.147785 | 0.239825 | 515 | 437 |
| GPR52     | 0.063908 | 0.147541 | 0.239508 | 515 | 199 |
| ZNF37B    | 0.063928 | 0.147415 | 0.239341 | 515 | 515 |
| C4orf36   | 0.063938 | 0.147352 | 0.239258 | 515 | 508 |
| ZNF705A   | 0.063948 | 0.147291 | 0.239192 | 515 | 238 |
| COG5      | 0.063999 | 0.146967 | 0.238809 | 515 | 515 |
| DCAF15    | 0.064075 | 0.146488 | 0.238088 | 515 | 515 |
| ZIM2      | 0.064097 | 0.146349 | 0.2379   | 515 | 170 |
| DCTD      | 0.064142 | 0.146063 | 0.237513 | 515 | 515 |
| OR5A1     | 0.064159 | 0.145957 | 0.237399 | 515 | 6   |
| PGF       | 0.064164 | 0.145926 | 0.237368 | 515 | 515 |
| ABR       | 0.064229 | 0.145515 | 0.236738 | 515 | 515 |
| HPR       | 0.064238 | 0.145461 | 0.236669 | 515 | 438 |
| SLC13A3   | 0.06425  | 0.145385 | 0.236583 | 515 | 515 |
| CCDC108   | 0.064255 | 0.145352 | 0.236549 | 515 | 497 |
| TERF2IP   | 0.064291 | 0.145128 | 0.236243 | 515 | 515 |
| CSPG5     | 0.064298 | 0.145084 | 0.236209 | 515 | 515 |
| POF1B     | 0.064304 | 0.145044 | 0.236163 | 515 | 513 |
| RBBP8     | 0.064434 | 0.144235 | 0.235018 | 515 | 515 |
| C7orf25   | 0.064445 | 0.144163 | 0.23492  | 515 | 515 |
| CDR1      | 0.064455 | 0.144105 | 0.234882 | 515 | 483 |
| KITLG     | 0.064476 | 0.143971 | 0.234684 | 515 | 515 |
| MYH13     | 0.064511 | 0.143755 | 0.234409 | 515 | 295 |
| JOSD2     | 0.064518 | 0.143711 | 0.234356 | 515 | 515 |
| KIR3DL3   | 0.064523 | 0.143681 | 0.234325 | 515 | 138 |
| KNTC1     | 0.064532 | 0.143624 | 0.234268 | 515 | 515 |
| RPA3      | 0.064544 | 0.143548 | 0.234184 | 515 | 515 |
| RNF135    | 0.064571 | 0.143384 | 0.233984 | 515 | 515 |
| SSTR1     | 0.06458  | 0.143325 | 0.233917 | 515 | 513 |
| CYTH3     | 0.064598 | 0.143212 | 0.233808 | 515 | 515 |
| MYOT      | 0.064633 | 0.142997 | 0.233531 | 515 | 406 |
| WFDC10A   | 0.06467  | 0.14277  | 0.233259 | 515 | 196 |
| FLNC      | 0.064693 | 0.142625 | 0.233079 | 515 | 515 |
| NDC80     | 0.064738 | 0.142346 | 0.23268  | 515 | 515 |
| KLHL15    | 0.064824 | 0.141816 | 0.23189  | 515 | 515 |
| DYDC2     | 0.064841 | 0.141709 | 0.231734 | 515 | 494 |
| ARGFX     | 0.064845 | 0.141688 | 0.23173  | 515 | 37  |
| SDR42E1   | 0.064888 | 0.14142  | 0.231375 | 515 | 515 |
| PCDHGA10  | 0.064892 | 0.141396 | 0.231353 | 515 | 515 |
| ACACB     | 0.064918 | 0.141238 | 0.231133 | 515 | 515 |
| NMD3      | 0.064943 | 0.141086 | 0.230942 | 515 | 515 |
| MPZL2     | 0.064946 | 0.141065 | 0.230926 | 515 | 515 |
| SLC25A32  | 0.064978 | 0.140872 | 0.230666 | 515 | 515 |
| DGAT2L6   | 0.06498  | 0.14086  | 0.230666 | 515 | 117 |
| C20orf132 | 0.065075 | 0.140277 | 0.22975  | 515 | 515 |
| WDR27     | 0.06508  | 0.140245 | 0.229716 | 515 | 515 |
| E2F4      | 0.065087 | 0.140205 | 0.229687 | 515 | 515 |
| PPP2R5E   | 0.065104 | 0.140097 | 0.229586 | 515 | 515 |

|           |          |          |          |     |     |
|-----------|----------|----------|----------|-----|-----|
| NHEDC1    | 0.065128 | 0.139953 | 0.229369 | 515 | 485 |
| FAM92A3   | 0.065187 | 0.139597 | 0.228879 | 515 | 39  |
| FES       | 0.065214 | 0.139431 | 0.228644 | 515 | 515 |
| C5orf53   | 0.065227 | 0.139348 | 0.228545 | 515 | 515 |
| ATXN7L1   | 0.06523  | 0.139332 | 0.228538 | 515 | 515 |
| PPA1      | 0.065258 | 0.139159 | 0.228312 | 515 | 515 |
| NID1      | 0.065276 | 0.139055 | 0.228159 | 515 | 515 |
| TOR2A     | 0.065298 | 0.138919 | 0.227973 | 515 | 515 |
| CXorf59   | 0.065304 | 0.138884 | 0.227953 | 515 | 317 |
| FJX1      | 0.065311 | 0.138838 | 0.227915 | 515 | 515 |
| SPATA7    | 0.065316 | 0.138812 | 0.227915 | 515 | 515 |
| GRID1     | 0.065317 | 0.138802 | 0.227915 | 515 | 514 |
| NES       | 0.065324 | 0.13876  | 0.22788  | 515 | 515 |
| CSGALNACT | 0.06534  | 0.138666 | 0.227745 | 515 | 515 |
| FAM123A   | 0.065355 | 0.138576 | 0.227634 | 515 | 163 |
| LCTL      | 0.065361 | 0.138539 | 0.227603 | 515 | 445 |
| NUP62CL   | 0.065379 | 0.138428 | 0.227466 | 515 | 515 |
| DIO3OS    | 0.065401 | 0.138297 | 0.227288 | 515 | 348 |
| C8orf12   | 0.065421 | 0.138174 | 0.227124 | 515 | 179 |
| ODZ4      | 0.065423 | 0.138163 | 0.227123 | 515 | 515 |
| ADAR      | 0.065425 | 0.138149 | 0.22712  | 515 | 515 |
| POLQ      | 0.065444 | 0.138036 | 0.226972 | 515 | 515 |
| WFDC3     | 0.065457 | 0.137959 | 0.226863 | 515 | 513 |
| HBP1      | 0.065469 | 0.137886 | 0.226761 | 515 | 515 |
| ZNF160    | 0.065545 | 0.137428 | 0.226122 | 515 | 515 |
| SERPINA11 | 0.065548 | 0.137411 | 0.226122 | 515 | 192 |
| OSGEP     | 0.0656   | 0.137095 | 0.22573  | 515 | 515 |
| C6orf1    | 0.065651 | 0.136793 | 0.22528  | 515 | 515 |
| CCDC85B   | 0.065654 | 0.136772 | 0.225263 | 515 | 515 |
| LOC285205 | 0.0657   | 0.136498 | 0.224834 | 515 | 277 |
| CCT6B     | 0.065715 | 0.136411 | 0.224725 | 515 | 515 |
| ADAM10    | 0.065765 | 0.136112 | 0.224287 | 515 | 515 |
| CPNE2     | 0.065767 | 0.136098 | 0.224283 | 515 | 515 |
| DNAJB13   | 0.065768 | 0.136095 | 0.224283 | 515 | 511 |
| RAB28     | 0.065797 | 0.135922 | 0.224067 | 515 | 515 |
| C15orf21  | 0.065868 | 0.135494 | 0.223528 | 515 | 515 |
| PPP2R3A   | 0.065893 | 0.13535  | 0.223327 | 515 | 515 |
| STON1-GTF | 0.06591  | 0.135248 | 0.223196 | 515 | 229 |
| ITPRIPL2  | 0.065968 | 0.134902 | 0.222697 | 515 | 515 |
| CHST1     | 0.065984 | 0.134808 | 0.222579 | 515 | 515 |
| FCN2      | 0.066011 | 0.134647 | 0.22235  | 515 | 262 |
| CYP4B1    | 0.066022 | 0.134581 | 0.222278 | 515 | 514 |
| ZNF420    | 0.066043 | 0.134459 | 0.222094 | 515 | 515 |
| ATP2A3    | 0.066051 | 0.134409 | 0.22203  | 515 | 515 |
| SYS1      | 0.066095 | 0.134152 | 0.221624 | 515 | 515 |
| C21orf99  | 0.066145 | 0.133858 | 0.221156 | 515 | 189 |
| TAS2R5    | 0.066149 | 0.133836 | 0.221139 | 515 | 506 |
| SNORA23   | 0.06615  | 0.133828 | 0.221139 | 515 | 168 |
| TMEM206   | 0.066221 | 0.133412 | 0.220529 | 515 | 515 |
| KPNA2     | 0.066249 | 0.133247 | 0.220294 | 515 | 515 |
| SNORA44   | 0.066285 | 0.133037 | 0.22     | 515 | 32  |
| THRB      | 0.066308 | 0.132901 | 0.219794 | 515 | 515 |
| TRIM26    | 0.066312 | 0.132879 | 0.219782 | 515 | 515 |
| C20orf111 | 0.066327 | 0.132788 | 0.21968  | 515 | 515 |

|           |          |          |          |     |     |
|-----------|----------|----------|----------|-----|-----|
| MED31     | 0.06636  | 0.132596 | 0.219416 | 515 | 515 |
| EPHA1     | 0.06639  | 0.132419 | 0.219177 | 515 | 515 |
| GPR75     | 0.066397 | 0.132381 | 0.219169 | 515 | 514 |
| DCAF17    | 0.0664   | 0.132359 | 0.219151 | 515 | 515 |
| GABRB3    | 0.066406 | 0.132326 | 0.219133 | 515 | 513 |
| SYNGR2    | 0.066409 | 0.13231  | 0.219133 | 515 | 515 |
| IL1RAP    | 0.066412 | 0.132292 | 0.219133 | 515 | 515 |
| SPESP1    | 0.066421 | 0.132237 | 0.219075 | 515 | 508 |
| CEACAM22F | 0.066434 | 0.132165 | 0.218992 | 515 | 314 |
| NSA2      | 0.066461 | 0.132006 | 0.218802 | 515 | 515 |
| ATP5F1    | 0.066485 | 0.131866 | 0.218625 | 515 | 515 |
| LOC729799 | 0.06649  | 0.131834 | 0.21859  | 515 | 515 |
| MOG       | 0.066492 | 0.131824 | 0.21859  | 515 | 122 |
| IL3       | 0.066502 | 0.131769 | 0.218518 | 515 | 17  |
| DUPD1     | 0.066513 | 0.131701 | 0.218442 | 515 | 67  |
| RAB2B     | 0.066538 | 0.131556 | 0.218237 | 515 | 515 |
| SBF2      | 0.066546 | 0.131513 | 0.218184 | 515 | 515 |
| LOC285733 | 0.066552 | 0.131476 | 0.218141 | 515 | 95  |
| CLN5      | 0.06657  | 0.131373 | 0.217989 | 515 | 515 |
| RNF41     | 0.066652 | 0.130897 | 0.217288 | 515 | 515 |
| MAG       | 0.066661 | 0.130842 | 0.217234 | 515 | 337 |
| SLITRK2   | 0.066668 | 0.130802 | 0.217234 | 515 | 464 |
| SHANK3    | 0.066718 | 0.130514 | 0.216796 | 515 | 515 |
| SLC6A13   | 0.066759 | 0.130276 | 0.216491 | 515 | 448 |
| SNORA62   | 0.066766 | 0.130237 | 0.216445 | 515 | 76  |
| SCARNA9   | 0.066766 | 0.130235 | 0.216445 | 515 | 502 |
| PGBD4     | 0.066784 | 0.130133 | 0.216326 | 515 | 515 |
| LOC648740 | 0.066858 | 0.129707 | 0.215779 | 515 | 507 |
| SERPINB10 | 0.066873 | 0.12962  | 0.21567  | 515 | 153 |
| CHP2      | 0.06688  | 0.129578 | 0.215618 | 515 | 333 |
| TMOD1     | 0.06696  | 0.129122 | 0.214954 | 515 | 515 |
| OIT3      | 0.06699  | 0.12895  | 0.214734 | 515 | 498 |
| SLC15A2   | 0.067005 | 0.128861 | 0.214622 | 515 | 515 |
| MYO18A    | 0.067041 | 0.128657 | 0.214354 | 515 | 515 |
| ZNF157    | 0.067135 | 0.12812  | 0.213566 | 515 | 401 |
| 7-Mar     | 0.067147 | 0.128052 | 0.213469 | 515 | 515 |
| BBS10     | 0.067187 | 0.127827 | 0.213184 | 515 | 515 |
| LRRC4     | 0.06721  | 0.127692 | 0.21303  | 515 | 515 |
| C12orf77  | 0.067222 | 0.127629 | 0.212977 | 515 | 123 |
| FOXB1     | 0.067226 | 0.127607 | 0.21297  | 515 | 346 |
| TNNC1     | 0.067233 | 0.127567 | 0.212928 | 515 | 510 |
| ANKRD27   | 0.067263 | 0.127392 | 0.212672 | 515 | 515 |
| FIGNL1    | 0.067306 | 0.12715  | 0.212355 | 515 | 515 |
| OR5T2     | 0.067353 | 0.126883 | 0.212016 | 515 | 26  |
| ARHGAP11E | 0.067354 | 0.126878 | 0.212016 | 515 | 513 |
| KIAA1712  | 0.067359 | 0.126852 | 0.212    | 515 | 515 |
| KCNJ16    | 0.067388 | 0.126684 | 0.211791 | 515 | 467 |
| CDC37L1   | 0.067399 | 0.126623 | 0.211724 | 515 | 515 |
| NCRNA0016 | 0.067411 | 0.126556 | 0.211646 | 515 | 498 |
| SNAP91    | 0.067457 | 0.126297 | 0.211302 | 515 | 389 |
| KRT14     | 0.067489 | 0.126118 | 0.211038 | 515 | 456 |
| KCNK4     | 0.067502 | 0.126044 | 0.21095  | 515 | 375 |
| KIAA1586  | 0.067538 | 0.12584  | 0.210644 | 515 | 515 |
| CD300LD   | 0.067544 | 0.125811 | 0.210613 | 515 | 31  |

|           |          |          |          |     |     |
|-----------|----------|----------|----------|-----|-----|
| SKIL      | 0.067583 | 0.125587 | 0.210273 | 515 | 515 |
| LOC613037 | 0.067602 | 0.125485 | 0.210155 | 515 | 478 |
| SEC24D    | 0.067605 | 0.125469 | 0.210155 | 515 | 515 |
| SLC9A11   | 0.067618 | 0.125396 | 0.210076 | 515 | 361 |
| TEC       | 0.067633 | 0.125311 | 0.209968 | 515 | 515 |
| SPOCK3    | 0.067634 | 0.125304 | 0.209968 | 515 | 462 |
| TREML2P1  | 0.067639 | 0.125279 | 0.20995  | 515 | 8   |
| ADAM21    | 0.067651 | 0.125207 | 0.209864 | 515 | 475 |
| CCDC130   | 0.067666 | 0.125127 | 0.209766 | 515 | 515 |
| NAA50     | 0.067687 | 0.125007 | 0.209634 | 515 | 515 |
| LOC100124 | 0.067692 | 0.124977 | 0.209602 | 515 | 222 |
| ANK3      | 0.067726 | 0.124792 | 0.209344 | 515 | 515 |
| RFX4      | 0.067896 | 0.123841 | 0.208082 | 515 | 231 |
| KIAA0586  | 0.067915 | 0.123739 | 0.207985 | 515 | 515 |
| ACO1      | 0.067962 | 0.123479 | 0.207647 | 515 | 515 |
| NMNAT3    | 0.068003 | 0.123252 | 0.207284 | 515 | 515 |
| NEURL1B   | 0.068022 | 0.123146 | 0.20714  | 515 | 515 |
| ZNF491    | 0.068046 | 0.123017 | 0.206975 | 515 | 514 |
| GDEP      | 0.068047 | 0.123007 | 0.206975 | 515 | 33  |
| HAND1     | 0.06807  | 0.122879 | 0.206796 | 515 | 263 |
| RAG2      | 0.068078 | 0.122839 | 0.206745 | 515 | 36  |
| OR51M1    | 0.068081 | 0.122819 | 0.206735 | 515 | 26  |
| GYPB      | 0.068087 | 0.122789 | 0.206713 | 515 | 22  |
| C19orf50  | 0.068107 | 0.122676 | 0.206558 | 515 | 515 |
| WDR62     | 0.068121 | 0.122599 | 0.206462 | 515 | 515 |
| CELA2B    | 0.068122 | 0.122596 | 0.206462 | 515 | 95  |
| ACTR8     | 0.068158 | 0.122399 | 0.206179 | 515 | 515 |
| TEX13B    | 0.068175 | 0.122303 | 0.206035 | 515 | 76  |
| RNASE13   | 0.068207 | 0.122128 | 0.205838 | 515 | 237 |
| RALA      | 0.068236 | 0.12197  | 0.205611 | 515 | 515 |
| ANKRD30B  | 0.068281 | 0.12172  | 0.205259 | 515 | 117 |
| FLG2      | 0.068292 | 0.121664 | 0.205182 | 515 | 212 |
| C11orf68  | 0.068328 | 0.121463 | 0.204913 | 515 | 515 |
| TMEM170A  | 0.068335 | 0.121427 | 0.20487  | 515 | 515 |
| AMZ2P1    | 0.068357 | 0.121307 | 0.204719 | 515 | 515 |
| GJB5      | 0.068363 | 0.121275 | 0.204716 | 515 | 488 |
| OSTA1pha  | 0.068367 | 0.121251 | 0.204702 | 515 | 513 |
| JUN       | 0.068368 | 0.121247 | 0.204702 | 515 | 515 |
| PIK3CB    | 0.068437 | 0.120871 | 0.204172 | 515 | 515 |
| LASP1     | 0.068487 | 0.120601 | 0.203734 | 515 | 515 |
| LOC642587 | 0.06849  | 0.12058  | 0.203715 | 515 | 450 |
| KIAA1467  | 0.068522 | 0.120408 | 0.203442 | 515 | 515 |
| MED21     | 0.06853  | 0.120365 | 0.203387 | 515 | 515 |
| OSBPL10   | 0.068533 | 0.120347 | 0.203374 | 515 | 515 |
| ZSWIM2    | 0.068567 | 0.120164 | 0.203099 | 515 | 56  |
| SLC22A1   | 0.068603 | 0.119972 | 0.202808 | 515 | 457 |
| APOBEC1   | 0.068661 | 0.119657 | 0.202326 | 515 | 273 |
| KCNJ1     | 0.068666 | 0.119628 | 0.202294 | 515 | 488 |
| KCNMB2    | 0.068666 | 0.119627 | 0.202294 | 515 | 491 |
| BIN1      | 0.068682 | 0.119544 | 0.202204 | 515 | 515 |
| ZNF578    | 0.068689 | 0.119506 | 0.20219  | 515 | 515 |
| CASR      | 0.068718 | 0.11935  | 0.201996 | 515 | 382 |
| LOXL2     | 0.068719 | 0.119344 | 0.201996 | 515 | 515 |
| LRRC49    | 0.06872  | 0.119338 | 0.201996 | 515 | 515 |

|           |          |          |          |     |     |
|-----------|----------|----------|----------|-----|-----|
| HMBOX1    | 0.068752 | 0.119166 | 0.201752 | 515 | 515 |
| IFT46     | 0.068766 | 0.11909  | 0.201641 | 515 | 515 |
| ASPDH     | 0.068773 | 0.119055 | 0.201616 | 515 | 295 |
| SMARCD3   | 0.068781 | 0.119008 | 0.201553 | 515 | 515 |
| PIGY      | 0.068828 | 0.118757 | 0.201213 | 515 | 515 |
| FKBP1AP1  | 0.068829 | 0.118752 | 0.201213 | 515 | 511 |
| DZIP1     | 0.068852 | 0.118631 | 0.201051 | 515 | 515 |
| GAPDHS    | 0.068855 | 0.118613 | 0.201037 | 515 | 457 |
| KCNRG     | 0.0689   | 0.118372 | 0.200748 | 515 | 515 |
| ADAM21P1  | 0.06895  | 0.118103 | 0.200394 | 515 | 342 |
| FHL2      | 0.06897  | 0.117999 | 0.200268 | 515 | 515 |
| XPNPEP1   | 0.068998 | 0.117847 | 0.200096 | 515 | 515 |
| PODXL     | 0.069032 | 0.117666 | 0.199856 | 515 | 515 |
| PKNOX1    | 0.069041 | 0.11762  | 0.199813 | 515 | 515 |
| MYL5      | 0.069066 | 0.117487 | 0.199619 | 515 | 515 |
| CYP21A2   | 0.069079 | 0.117415 | 0.199515 | 515 | 513 |
| SERP2     | 0.069104 | 0.117282 | 0.19934  | 515 | 515 |
| ACYP2     | 0.069121 | 0.117194 | 0.199223 | 515 | 515 |
| KRTAP21-2 | 0.069125 | 0.117172 | 0.199221 | 515 | 5   |
| SEC14L3   | 0.069128 | 0.117153 | 0.199204 | 515 | 339 |
| GPR109B   | 0.069134 | 0.117121 | 0.199167 | 515 | 513 |
| FAM35B2   | 0.069151 | 0.117032 | 0.199033 | 515 | 515 |
| ZNF114    | 0.069164 | 0.116967 | 0.19894  | 515 | 505 |
| IQGAP1    | 0.069187 | 0.116843 | 0.198813 | 515 | 515 |
| C1orf174  | 0.069225 | 0.116638 | 0.198515 | 515 | 515 |
| ANKRD2    | 0.069228 | 0.116624 | 0.198512 | 515 | 426 |
| SF3B5     | 0.069235 | 0.116586 | 0.198495 | 515 | 515 |
| TCEAL3    | 0.069276 | 0.116372 | 0.198214 | 515 | 515 |
| FGD6      | 0.069308 | 0.116201 | 0.197973 | 515 | 515 |
| TRIP6     | 0.069356 | 0.115946 | 0.197606 | 515 | 515 |
| BZRAP1    | 0.069426 | 0.11558  | 0.197067 | 515 | 515 |
| OR6A2     | 0.069451 | 0.115449 | 0.196894 | 515 | 65  |
| ZNF883    | 0.069461 | 0.115395 | 0.196835 | 515 | 515 |
| OR1D2     | 0.069536 | 0.115002 | 0.196215 | 515 | 7   |
| PLCXD3    | 0.069543 | 0.114964 | 0.196168 | 515 | 511 |
| HP        | 0.069567 | 0.114842 | 0.19601  | 515 | 515 |
| ZNF394    | 0.069606 | 0.114636 | 0.195691 | 515 | 515 |
| ZIC2      | 0.06965  | 0.114408 | 0.195335 | 515 | 414 |
| MAGT1     | 0.069667 | 0.114317 | 0.195197 | 515 | 515 |
| ELMOD2    | 0.069669 | 0.11431  | 0.195197 | 515 | 515 |
| DFFB      | 0.069683 | 0.114236 | 0.195091 | 515 | 515 |
| OR2W3     | 0.069687 | 0.114214 | 0.19507  | 515 | 344 |
| C9orf153  | 0.069722 | 0.114032 | 0.194793 | 515 | 409 |
| AJAP1     | 0.069723 | 0.114026 | 0.194793 | 515 | 495 |
| FAM19A5   | 0.069726 | 0.114012 | 0.194792 | 515 | 514 |
| FAM189A2  | 0.069734 | 0.113972 | 0.194753 | 515 | 515 |
| AGPS      | 0.069737 | 0.113955 | 0.194753 | 515 | 515 |
| TUBB2A    | 0.069738 | 0.113949 | 0.194753 | 515 | 515 |
| MEGF10    | 0.069789 | 0.113687 | 0.194419 | 515 | 497 |
| LRIG2     | 0.069798 | 0.11364  | 0.194355 | 515 | 515 |
| ZNF680    | 0.069802 | 0.113618 | 0.194345 | 515 | 515 |
| FBX044    | 0.069813 | 0.11356  | 0.194285 | 515 | 515 |
| CACNB4    | 0.069825 | 0.113499 | 0.194215 | 515 | 515 |
| KIAA0355  | 0.06984  | 0.113422 | 0.194115 | 515 | 515 |

|           |          |          |          |     |     |
|-----------|----------|----------|----------|-----|-----|
| PLRG1     | 0.069863 | 0.113302 | 0.193928 | 515 | 515 |
| SPAG4     | 0.069891 | 0.113155 | 0.193725 | 515 | 515 |
| ARHGEF9   | 0.069892 | 0.113153 | 0.193725 | 515 | 515 |
| ESRRB     | 0.069898 | 0.11312  | 0.193715 | 515 | 418 |
| C14orf142 | 0.069926 | 0.112976 | 0.193484 | 515 | 515 |
| N4BP2L2   | 0.069929 | 0.112961 | 0.193476 | 515 | 515 |
| KIAA1751  | 0.069956 | 0.11282  | 0.193252 | 515 | 483 |
| OR51B6    | 0.069982 | 0.112687 | 0.193057 | 515 | 29  |
| EXT2      | 0.070033 | 0.112422 | 0.192652 | 515 | 515 |
| TNKS2     | 0.070056 | 0.112305 | 0.192468 | 515 | 515 |
| SLC39A2   | 0.070065 | 0.11226  | 0.192408 | 515 | 343 |
| CORO6     | 0.070077 | 0.112196 | 0.192331 | 515 | 513 |
| TCHH      | 0.070079 | 0.11219  | 0.192331 | 515 | 513 |
| ANUBL1    | 0.070082 | 0.112173 | 0.192331 | 515 | 515 |
| LOC338588 | 0.070093 | 0.112119 | 0.192297 | 515 | 40  |
| NAP1L6    | 0.0701   | 0.112081 | 0.192249 | 515 | 369 |
| GRIN3B    | 0.070112 | 0.112018 | 0.192174 | 515 | 488 |
| MSRA      | 0.070113 | 0.112014 | 0.192174 | 515 | 515 |
| IFNW1     | 0.070135 | 0.1119   | 0.192054 | 515 | 141 |
| PCDHAC2   | 0.070137 | 0.111888 | 0.19205  | 515 | 515 |
| RWDD2B    | 0.070145 | 0.111848 | 0.191998 | 515 | 515 |
| GSTM2     | 0.070157 | 0.111786 | 0.191908 | 515 | 515 |
| SNORA70   | 0.070166 | 0.111744 | 0.191852 | 515 | 81  |
| TREX2     | 0.070175 | 0.111696 | 0.191802 | 515 | 500 |
| TBRG1     | 0.070185 | 0.111645 | 0.191757 | 515 | 515 |
| PRSSL1    | 0.070233 | 0.111401 | 0.191444 | 515 | 289 |
| KHDRBS2   | 0.070236 | 0.111383 | 0.19143  | 515 | 490 |
| DOC2A     | 0.07025  | 0.111312 | 0.191323 | 515 | 508 |
| LOC390858 | 0.070252 | 0.111304 | 0.191323 | 515 | 29  |
| NCAN      | 0.07029  | 0.111107 | 0.191037 | 515 | 348 |
| SLC17A7   | 0.070295 | 0.111083 | 0.191012 | 515 | 506 |
| AZIN1     | 0.070355 | 0.110778 | 0.190571 | 515 | 515 |
| TAS2R10   | 0.070374 | 0.110683 | 0.19044  | 515 | 378 |
| PLEKHM1P  | 0.070392 | 0.110591 | 0.190313 | 515 | 515 |
| AVPR1B    | 0.070394 | 0.110582 | 0.190313 | 515 | 262 |
| FAM122B   | 0.070422 | 0.11044  | 0.190103 | 515 | 515 |
| FILIP1    | 0.070423 | 0.11043  | 0.190103 | 515 | 515 |
| CLN8      | 0.070503 | 0.110026 | 0.189455 | 515 | 515 |
| PALM      | 0.070536 | 0.109859 | 0.189265 | 515 | 515 |
| SCARNA3   | 0.070561 | 0.109734 | 0.189067 | 515 | 11  |
| ORAI3     | 0.070571 | 0.109686 | 0.189017 | 515 | 515 |
| LOC100272 | 0.070583 | 0.109624 | 0.188943 | 515 | 515 |
| FAM193B   | 0.070602 | 0.10953  | 0.188813 | 515 | 515 |
| CMYA5     | 0.070709 | 0.108989 | 0.18802  | 515 | 515 |
| KCNQ1DN   | 0.070722 | 0.108926 | 0.18795  | 515 | 94  |
| CLEC18B   | 0.070733 | 0.108868 | 0.187866 | 515 | 471 |
| RBM7      | 0.070756 | 0.108755 | 0.187687 | 515 | 515 |
| BBS2      | 0.070767 | 0.108697 | 0.187604 | 515 | 515 |
| MAPK12    | 0.070774 | 0.108663 | 0.187561 | 515 | 515 |
| CCNDBP1   | 0.070781 | 0.108629 | 0.187518 | 515 | 515 |
| SHC2      | 0.070784 | 0.108613 | 0.187506 | 515 | 515 |
| FOXL1     | 0.070798 | 0.108544 | 0.187404 | 515 | 515 |
| SHQ1      | 0.070799 | 0.108541 | 0.187404 | 515 | 515 |
| HACE1     | 0.070837 | 0.108348 | 0.187162 | 515 | 515 |

|           |          |          |          |     |     |
|-----------|----------|----------|----------|-----|-----|
| FAM171B   | 0.070858 | 0.108245 | 0.187001 | 515 | 515 |
| ARHGAP23  | 0.070898 | 0.108044 | 0.18667  | 515 | 515 |
| MAPK14    | 0.070906 | 0.108005 | 0.186665 | 515 | 515 |
| LIM2      | 0.070971 | 0.107683 | 0.186158 | 515 | 73  |
| SV2A      | 0.071007 | 0.107504 | 0.185914 | 515 | 515 |
| NKAIN4    | 0.071034 | 0.107367 | 0.185709 | 515 | 484 |
| CDKL3     | 0.071059 | 0.107246 | 0.185515 | 515 | 515 |
| ZBTB43    | 0.071078 | 0.107152 | 0.185369 | 515 | 515 |
| LOC340508 | 0.071092 | 0.107083 | 0.185278 | 515 | 203 |
| E2F2      | 0.071099 | 0.107048 | 0.185237 | 515 | 515 |
| OR3A3     | 0.071108 | 0.107004 | 0.185193 | 515 | 36  |
| S100A6    | 0.071112 | 0.106984 | 0.185174 | 515 | 515 |
| OPN1MW    | 0.071124 | 0.106922 | 0.185084 | 515 | 15  |
| TMBIM1    | 0.071125 | 0.106917 | 0.185084 | 515 | 515 |
| TRPV3     | 0.071136 | 0.106863 | 0.185013 | 515 | 476 |
| ISCA1P1   | 0.071162 | 0.106736 | 0.184825 | 515 | 515 |
| KIF20B    | 0.071165 | 0.106719 | 0.184811 | 515 | 515 |
| C11orf73  | 0.071167 | 0.106709 | 0.184811 | 515 | 515 |
| FAM82A1   | 0.071196 | 0.106569 | 0.1846   | 515 | 515 |
| FOS       | 0.071216 | 0.106469 | 0.184443 | 515 | 515 |
| LOXL4     | 0.071235 | 0.106376 | 0.1843   | 515 | 515 |
| CREG1     | 0.071283 | 0.106137 | 0.183931 | 515 | 515 |
| SLC34A1   | 0.071301 | 0.106051 | 0.183846 | 515 | 289 |
| C18orf19  | 0.071316 | 0.105976 | 0.183731 | 515 | 515 |
| CLDN2     | 0.071321 | 0.105951 | 0.183704 | 515 | 515 |
| C16orf63  | 0.071404 | 0.105546 | 0.18313  | 515 | 515 |
| NAGS      | 0.07141  | 0.105514 | 0.183106 | 515 | 515 |
| MAPKSP1   | 0.071434 | 0.105398 | 0.182936 | 515 | 515 |
| FAM120B   | 0.071494 | 0.105106 | 0.182535 | 515 | 515 |
| TNNC2     | 0.071496 | 0.105095 | 0.182535 | 515 | 506 |
| KIAA0141  | 0.071518 | 0.104987 | 0.182371 | 515 | 515 |
| APIP      | 0.071537 | 0.104897 | 0.182257 | 515 | 515 |
| NRM       | 0.071555 | 0.104806 | 0.182131 | 515 | 515 |
| BPESC1    | 0.071571 | 0.10473  | 0.182045 | 515 | 6   |
| CA10      | 0.071635 | 0.104418 | 0.181631 | 515 | 348 |
| CDC42EP2  | 0.071637 | 0.104411 | 0.181631 | 515 | 515 |
| POLA2     | 0.071644 | 0.104374 | 0.181585 | 515 | 515 |
| PSMC6     | 0.071653 | 0.104334 | 0.181547 | 515 | 515 |
| C8orf48   | 0.071697 | 0.104119 | 0.18122  | 515 | 514 |
| HSPA12A   | 0.071705 | 0.104079 | 0.181165 | 515 | 515 |
| SGEF      | 0.071727 | 0.103973 | 0.180997 | 515 | 515 |
| SNX32     | 0.07179  | 0.103672 | 0.18052  | 515 | 469 |
| CEP55     | 0.071797 | 0.103637 | 0.180491 | 515 | 515 |
| ITLN2     | 0.0718   | 0.103621 | 0.18048  | 515 | 390 |
| CENPE     | 0.071855 | 0.103359 | 0.180101 | 515 | 515 |
| CT45A1    | 0.071908 | 0.103103 | 0.179702 | 515 | 215 |
| ZNF483    | 0.07193  | 0.102998 | 0.179535 | 515 | 515 |
| CP110     | 0.071954 | 0.102882 | 0.17941  | 515 | 515 |
| RHBDL3    | 0.07196  | 0.102854 | 0.179377 | 515 | 507 |
| ALPL      | 0.071962 | 0.102845 | 0.179377 | 515 | 515 |
| ASB14     | 0.071964 | 0.102834 | 0.179374 | 515 | 514 |
| SLC1A1    | 0.071988 | 0.102719 | 0.179226 | 515 | 515 |
| OR51E1    | 0.072014 | 0.102592 | 0.179061 | 515 | 483 |
| DRD1      | 0.072037 | 0.102482 | 0.178885 | 515 | 472 |

|           |          |          |          |     |     |
|-----------|----------|----------|----------|-----|-----|
| LOC144486 | 0.072061 | 0.102369 | 0.178719 | 515 | 513 |
| SPRR3     | 0.072073 | 0.10231  | 0.178631 | 515 | 328 |
| C2orf66   | 0.072076 | 0.102299 | 0.178628 | 515 | 349 |
| NPFF      | 0.072084 | 0.102258 | 0.178572 | 515 | 510 |
| MYOZ3     | 0.072127 | 0.102054 | 0.178263 | 515 | 514 |
| SLC13A4   | 0.072143 | 0.101977 | 0.178174 | 515 | 496 |
| KDSR      | 0.072147 | 0.101961 | 0.178162 | 515 | 515 |
| GRIA3     | 0.072165 | 0.101875 | 0.178042 | 515 | 465 |
| BOD1      | 0.072207 | 0.101673 | 0.177705 | 515 | 515 |
| PGBD1     | 0.072311 | 0.10118  | 0.176921 | 515 | 515 |
| DTD1      | 0.072318 | 0.101146 | 0.176878 | 515 | 515 |
| SPHKAP    | 0.072343 | 0.101029 | 0.176687 | 515 | 237 |
| COPS8     | 0.072347 | 0.101012 | 0.176674 | 515 | 515 |
| SMN1      | 0.072397 | 0.100774 | 0.176288 | 515 | 449 |
| SLED1     | 0.072399 | 0.100764 | 0.176287 | 515 | 432 |
| PPP1R12C  | 0.072411 | 0.100707 | 0.176217 | 515 | 515 |
| ZNF225    | 0.072412 | 0.100703 | 0.176217 | 515 | 515 |
| RPGRIP1   | 0.072418 | 0.100676 | 0.17621  | 515 | 512 |
| C14orf109 | 0.07242  | 0.100665 | 0.176205 | 515 | 515 |
| C1orf110  | 0.072467 | 0.100443 | 0.175849 | 515 | 377 |
| ZNF641    | 0.072488 | 0.100348 | 0.175712 | 515 | 515 |
| PRKCE     | 0.072494 | 0.100317 | 0.175688 | 515 | 515 |
| SEZ6L     | 0.072505 | 0.100267 | 0.175628 | 515 | 418 |
| DPYSL2    | 0.072537 | 0.100113 | 0.175394 | 515 | 515 |
| WNT11     | 0.072557 | 0.10002  | 0.175291 | 515 | 514 |
| RGAG4     | 0.072567 | 0.099973 | 0.175224 | 515 | 515 |
| C10orf114 | 0.072649 | 0.099591 | 0.174708 | 515 | 515 |
| DKK1      | 0.072681 | 0.09944  | 0.174458 | 515 | 510 |
| MAB21L1   | 0.072747 | 0.099134 | 0.173997 | 515 | 383 |
| ISCA1     | 0.072749 | 0.099123 | 0.173997 | 515 | 515 |
| TSHZ1     | 0.072761 | 0.099071 | 0.173948 | 515 | 515 |
| AVL9      | 0.072772 | 0.099018 | 0.173901 | 515 | 515 |
| C4BPB     | 0.072779 | 0.098986 | 0.17386  | 515 | 509 |
| ARMS2     | 0.07279  | 0.098936 | 0.173804 | 515 | 189 |
| BAX       | 0.07279  | 0.098936 | 0.173804 | 515 | 515 |
| CYFIP1    | 0.072802 | 0.098878 | 0.173747 | 515 | 515 |
| ACSBG1    | 0.072818 | 0.098804 | 0.173662 | 515 | 508 |
| SALL4     | 0.072853 | 0.098644 | 0.173411 | 515 | 515 |
| PRSS23    | 0.072874 | 0.098543 | 0.17328  | 515 | 515 |
| RAB6B     | 0.072918 | 0.098341 | 0.173017 | 515 | 515 |
| H2AFJ     | 0.072931 | 0.098279 | 0.172923 | 515 | 515 |
| ZNF627    | 0.072955 | 0.098171 | 0.172778 | 515 | 515 |
| LOC389458 | 0.072955 | 0.09817  | 0.172778 | 515 | 497 |
| MPZL3     | 0.07296  | 0.098145 | 0.17277  | 515 | 515 |
| FBXL16    | 0.072974 | 0.098082 | 0.172682 | 515 | 515 |
| FCF1      | 0.072987 | 0.098023 | 0.172594 | 515 | 515 |
| CBLN2     | 0.073031 | 0.09782  | 0.172312 | 515 | 334 |
| SNORA14B  | 0.073082 | 0.097583 | 0.171925 | 515 | 40  |
| ZNF549    | 0.073152 | 0.097262 | 0.171419 | 515 | 515 |
| FAM74A3   | 0.073174 | 0.097164 | 0.171293 | 515 | 40  |
| ANKRD26P1 | 0.073212 | 0.096988 | 0.171012 | 515 | 164 |
| C19orf2   | 0.073237 | 0.096874 | 0.170863 | 515 | 515 |
| ZNF81     | 0.073312 | 0.096529 | 0.170339 | 515 | 515 |
| LOC401431 | 0.073327 | 0.096465 | 0.17024  | 515 | 515 |



|           |          |          |          |     |     |
|-----------|----------|----------|----------|-----|-----|
| DACH1     | 0.073347 | 0.096374 | 0.170124 | 515 | 515 |
| SNORA4    | 0.073347 | 0.09637  | 0.170124 | 515 | 47  |
| SLCO4A1   | 0.073379 | 0.096226 | 0.169894 | 515 | 515 |
| KCNAB3    | 0.07343  | 0.095994 | 0.169513 | 515 | 513 |
| TM6SF2    | 0.073454 | 0.095884 | 0.16935  | 515 | 503 |
| FIGNL2    | 0.073524 | 0.095567 | 0.168893 | 515 | 515 |
| C6orf162  | 0.073537 | 0.095511 | 0.168825 | 515 | 515 |
| UPK1A     | 0.073538 | 0.095504 | 0.168825 | 515 | 336 |
| LEMD1     | 0.073577 | 0.095331 | 0.168582 | 515 | 495 |
| PPP2R5C   | 0.073668 | 0.094921 | 0.167916 | 515 | 515 |
| PPP1R14D  | 0.073694 | 0.094801 | 0.167749 | 515 | 509 |
| PCDHGC5   | 0.073709 | 0.094733 | 0.167643 | 515 | 500 |
| GRM7      | 0.073739 | 0.094599 | 0.167465 | 515 | 332 |
| DLGAP5    | 0.073743 | 0.094584 | 0.167453 | 515 | 515 |
| TNFRSF11A | 0.073748 | 0.094561 | 0.167428 | 515 | 515 |
| ZNF655    | 0.073814 | 0.094265 | 0.166962 | 515 | 515 |
| C12orf43  | 0.073846 | 0.094123 | 0.166726 | 515 | 515 |
| LHFPL3    | 0.073867 | 0.094029 | 0.166574 | 515 | 463 |
| MED23     | 0.073868 | 0.094024 | 0.166574 | 515 | 515 |
| CYP2F1    | 0.073939 | 0.093708 | 0.166094 | 515 | 367 |
| IFRD1     | 0.073973 | 0.093556 | 0.165867 | 515 | 515 |
| TCF23     | 0.074015 | 0.093369 | 0.165581 | 515 | 37  |
| C9orf40   | 0.074018 | 0.093355 | 0.165576 | 515 | 515 |
| KLHDC7A   | 0.074019 | 0.093352 | 0.165576 | 515 | 512 |
| MIA       | 0.074034 | 0.093286 | 0.165507 | 515 | 483 |
| NOV       | 0.074071 | 0.093119 | 0.165299 | 515 | 515 |
| BDH2      | 0.074128 | 0.092869 | 0.164899 | 515 | 515 |
| ST8SIA5   | 0.074166 | 0.092701 | 0.164674 | 515 | 447 |
| PCSK7     | 0.074175 | 0.092662 | 0.164619 | 515 | 515 |
| C12orf40  | 0.074203 | 0.092538 | 0.164442 | 515 | 79  |
| CDC7      | 0.074206 | 0.092522 | 0.164429 | 515 | 515 |
| SKINTL    | 0.074252 | 0.092321 | 0.164165 | 515 | 266 |
| CENPI     | 0.074259 | 0.09229  | 0.164162 | 515 | 515 |
| C10orf107 | 0.074271 | 0.09224  | 0.164088 | 515 | 491 |
| KIR3DX1   | 0.074287 | 0.092168 | 0.164003 | 515 | 258 |
| SH3D19    | 0.074289 | 0.092157 | 0.163999 | 515 | 515 |
| SLC25A5   | 0.074312 | 0.092059 | 0.16384  | 515 | 515 |
| TNFRSF12A | 0.074336 | 0.091952 | 0.163692 | 515 | 515 |
| ANAPC4    | 0.07435  | 0.091893 | 0.163617 | 515 | 515 |
| CLIC1     | 0.074366 | 0.091822 | 0.163505 | 515 | 515 |
| WBP2NL    | 0.074396 | 0.091692 | 0.163302 | 515 | 503 |
| RABEP1    | 0.074405 | 0.09165  | 0.163242 | 515 | 515 |
| VMA21     | 0.074469 | 0.091371 | 0.162832 | 515 | 515 |
| ITGA7     | 0.074476 | 0.091341 | 0.162793 | 515 | 515 |
| BMP8A     | 0.074523 | 0.091134 | 0.162438 | 515 | 515 |
| ZNF470    | 0.074531 | 0.091103 | 0.162412 | 515 | 515 |
| SLC2A8    | 0.074687 | 0.090424 | 0.16136  | 515 | 515 |
| MAPKBP1   | 0.074689 | 0.090417 | 0.16136  | 515 | 515 |
| PDZD11    | 0.07469  | 0.090409 | 0.16136  | 515 | 515 |
| FITM1     | 0.074696 | 0.090387 | 0.161338 | 515 | 506 |
| DKFZp686C | 0.074733 | 0.090226 | 0.161108 | 515 | 514 |
| BEND7     | 0.0748   | 0.089937 | 0.16062  | 515 | 515 |
| C1orf175  | 0.074856 | 0.089694 | 0.160229 | 515 | 514 |
| CD177     | 0.074923 | 0.089408 | 0.159789 | 515 | 506 |

|           |          |          |          |     |     |
|-----------|----------|----------|----------|-----|-----|
| PRKCD     | 0.07493  | 0.089379 | 0.159752 | 515 | 515 |
| C1orf230  | 0.07493  | 0.089376 | 0.159752 | 515 | 400 |
| C6orf223  | 0.074981 | 0.089159 | 0.159444 | 515 | 514 |
| SLC4A1    | 0.07501  | 0.089033 | 0.159262 | 515 | 353 |
| LOC100131 | 0.075073 | 0.088767 | 0.158829 | 515 | 515 |
| GTPBP1    | 0.075087 | 0.088709 | 0.158767 | 515 | 515 |
| KCNGB1    | 0.075099 | 0.088656 | 0.158686 | 515 | 487 |
| LGALS3BP  | 0.075099 | 0.088655 | 0.158686 | 515 | 515 |
| LENG8     | 0.075129 | 0.08853  | 0.158511 | 515 | 515 |
| TRPC3     | 0.075141 | 0.088479 | 0.158455 | 515 | 502 |
| FTH1      | 0.075157 | 0.088411 | 0.158376 | 515 | 515 |
| LRRFIP1   | 0.075199 | 0.088232 | 0.158084 | 515 | 515 |
| HRNR      | 0.075224 | 0.088123 | 0.157931 | 515 | 499 |
| PIP5K1B   | 0.075263 | 0.087958 | 0.157692 | 515 | 515 |
| CSN3      | 0.075299 | 0.087807 | 0.157449 | 515 | 31  |
| ITGA2B    | 0.075327 | 0.08769  | 0.157254 | 515 | 506 |
| PCDHGA6   | 0.075364 | 0.087532 | 0.157013 | 515 | 515 |
| ALDOB     | 0.075368 | 0.087517 | 0.156999 | 515 | 492 |
| PLAT      | 0.0754   | 0.087383 | 0.156787 | 515 | 515 |
| PNPO      | 0.075426 | 0.087271 | 0.156601 | 515 | 515 |
| CLTB      | 0.075431 | 0.08725  | 0.156577 | 515 | 515 |
| LY6G6F    | 0.075441 | 0.087211 | 0.156535 | 515 | 98  |
| ABHD12B   | 0.075467 | 0.087101 | 0.156351 | 515 | 461 |
| GPR157    | 0.075493 | 0.086989 | 0.156197 | 515 | 515 |
| ERICH1    | 0.075494 | 0.086986 | 0.156197 | 515 | 515 |
| KIAA0831  | 0.07552  | 0.086876 | 0.156046 | 515 | 515 |
| PTDSS1    | 0.075541 | 0.08679  | 0.15592  | 515 | 515 |
| SLC22A6   | 0.07556  | 0.086711 | 0.155791 | 515 | 12  |
| NPPC      | 0.075561 | 0.086704 | 0.155791 | 515 | 170 |
| SEMA5A    | 0.075564 | 0.086692 | 0.155785 | 515 | 515 |
| AHSP      | 0.075579 | 0.086633 | 0.155693 | 515 | 224 |
| KLF7      | 0.075586 | 0.086601 | 0.155663 | 515 | 515 |
| OR2T34    | 0.075609 | 0.086506 | 0.155506 | 515 | 7   |
| KIAA0513  | 0.075609 | 0.086504 | 0.155506 | 515 | 515 |
| FLG       | 0.075648 | 0.086344 | 0.155244 | 515 | 491 |
| GRM3      | 0.075657 | 0.086305 | 0.155201 | 515 | 400 |
| IPMK      | 0.075666 | 0.086267 | 0.155148 | 515 | 515 |
| GEN1      | 0.075685 | 0.086187 | 0.155017 | 515 | 515 |
| ANO2      | 0.075716 | 0.086059 | 0.154802 | 515 | 510 |
| C12orf42  | 0.075738 | 0.085968 | 0.154666 | 515 | 452 |
| IRX1      | 0.075745 | 0.085941 | 0.15463  | 515 | 456 |
| UHMK1     | 0.07577  | 0.085837 | 0.15447  | 515 | 515 |
| H1FNT     | 0.07579  | 0.085751 | 0.154358 | 515 | 292 |
| SCRG1     | 0.075795 | 0.085733 | 0.154357 | 515 | 367 |
| ZNF585B   | 0.075814 | 0.085652 | 0.154249 | 515 | 515 |
| ICAIL     | 0.07583  | 0.085588 | 0.154148 | 515 | 515 |
| TDRD12    | 0.075831 | 0.085583 | 0.154148 | 515 | 322 |
| BCL8      | 0.075836 | 0.085563 | 0.154148 | 515 | 417 |
| WBSCR17   | 0.075842 | 0.085536 | 0.154123 | 515 | 514 |
| ZNF833    | 0.075861 | 0.08546  | 0.154028 | 515 | 515 |
| ARAP1     | 0.07587  | 0.085422 | 0.153974 | 515 | 515 |
| LAMA3     | 0.075894 | 0.085324 | 0.153825 | 515 | 515 |
| CCDC33    | 0.075897 | 0.085309 | 0.153811 | 515 | 441 |
| OR1L1     | 0.075903 | 0.085284 | 0.15378  | 515 | 16  |

|           |          |          |          |     |     |
|-----------|----------|----------|----------|-----|-----|
| RGS7BP    | 0.075922 | 0.085206 | 0.153668 | 515 | 504 |
| FBXW11    | 0.075922 | 0.085205 | 0.153668 | 515 | 515 |
| CRTAC1    | 0.075926 | 0.085191 | 0.153668 | 515 | 514 |
| PDGFD     | 0.07594  | 0.085131 | 0.153573 | 515 | 515 |
| SH3RF3    | 0.075996 | 0.084902 | 0.153188 | 515 | 515 |
| DTX3      | 0.076002 | 0.084877 | 0.153158 | 515 | 515 |
| DPP8      | 0.07602  | 0.084805 | 0.153041 | 515 | 515 |
| SBDS      | 0.076057 | 0.08465  | 0.152798 | 515 | 515 |
| CDCA7     | 0.076091 | 0.084513 | 0.152583 | 515 | 515 |
| MKRN2     | 0.076094 | 0.084499 | 0.152571 | 515 | 515 |
| LPPR5     | 0.076124 | 0.084379 | 0.152382 | 515 | 312 |
| ZNF501    | 0.076127 | 0.084366 | 0.152372 | 515 | 515 |
| MGLL      | 0.076165 | 0.084209 | 0.152145 | 515 | 515 |
| LOC349196 | 0.076171 | 0.084183 | 0.152111 | 515 | 485 |
| SATB2     | 0.076191 | 0.084102 | 0.151977 | 515 | 515 |
| PTH1R     | 0.076192 | 0.084098 | 0.151977 | 515 | 515 |
| SNX25     | 0.076209 | 0.084029 | 0.151888 | 515 | 515 |
| PLGLA     | 0.076242 | 0.083897 | 0.151681 | 515 | 10  |
| ZNF688    | 0.076281 | 0.083737 | 0.151483 | 515 | 515 |
| RYR3      | 0.076373 | 0.083362 | 0.150873 | 515 | 513 |
| SERTAD3   | 0.076383 | 0.083321 | 0.150827 | 515 | 515 |
| NCRNA0009 | 0.076416 | 0.083187 | 0.150625 | 515 | 17  |
| COL11A1   | 0.076446 | 0.08307  | 0.150462 | 515 | 514 |
| ENPP3     | 0.076463 | 0.082999 | 0.150351 | 515 | 512 |
| ELK1      | 0.076478 | 0.082939 | 0.150284 | 515 | 515 |
| NCRNA0020 | 0.076483 | 0.082919 | 0.150262 | 515 | 496 |
| KCTD9     | 0.076485 | 0.082909 | 0.150262 | 515 | 515 |
| ZNF283    | 0.07649  | 0.082889 | 0.150249 | 515 | 515 |
| VCPIP1    | 0.076491 | 0.082887 | 0.150249 | 515 | 515 |
| ZNF296    | 0.076497 | 0.08286  | 0.150223 | 515 | 515 |
| RIN2      | 0.076506 | 0.082828 | 0.150191 | 515 | 515 |
| TPSG1     | 0.076523 | 0.082756 | 0.150088 | 515 | 429 |
| PHYHIP    | 0.076586 | 0.082505 | 0.149688 | 515 | 514 |
| IPO8      | 0.076591 | 0.082484 | 0.149664 | 515 | 515 |
| CPD       | 0.076613 | 0.082395 | 0.149528 | 515 | 515 |
| ZFAND2A   | 0.076654 | 0.082231 | 0.14928  | 515 | 515 |
| C17orf51  | 0.076663 | 0.082194 | 0.149231 | 515 | 515 |
| RDM1      | 0.076691 | 0.082082 | 0.14907  | 515 | 501 |
| RRM2B     | 0.076692 | 0.082079 | 0.14907  | 515 | 515 |
| SCHIP1    | 0.076712 | 0.081998 | 0.148956 | 515 | 515 |
| TFB1M     | 0.076767 | 0.08178  | 0.148616 | 515 | 515 |
| EIF1B     | 0.076859 | 0.081413 | 0.148016 | 515 | 515 |
| DUSP13    | 0.076867 | 0.081381 | 0.147985 | 515 | 452 |
| LOC284837 | 0.076897 | 0.081262 | 0.147808 | 515 | 515 |
| SNRPN     | 0.076901 | 0.081248 | 0.147796 | 515 | 515 |
| BRSK1     | 0.076948 | 0.081058 | 0.14749  | 515 | 515 |
| PRDM2     | 0.076965 | 0.080991 | 0.147395 | 515 | 515 |
| LOC338758 | 0.07699  | 0.080893 | 0.147261 | 515 | 515 |
| OR1A2     | 0.076999 | 0.080857 | 0.147246 | 515 | 9   |
| ELN       | 0.077001 | 0.080851 | 0.147246 | 515 | 515 |
| DMRT2     | 0.077038 | 0.080703 | 0.147006 | 515 | 484 |
| PYROXD1   | 0.077061 | 0.080612 | 0.146879 | 515 | 515 |
| MMP16     | 0.077096 | 0.080477 | 0.14666  | 515 | 511 |
| ASF1A     | 0.077149 | 0.080267 | 0.146332 | 515 | 515 |

|           |          |          |          |     |     |
|-----------|----------|----------|----------|-----|-----|
| C11orf16  | 0.07715  | 0.080261 | 0.146332 | 515 | 486 |
| C2orf54   | 0.077165 | 0.080203 | 0.146255 | 515 | 513 |
| LOC100190 | 0.07717  | 0.080185 | 0.146249 | 515 | 515 |
| R3HDML    | 0.077183 | 0.080134 | 0.146196 | 515 | 347 |
| TFPT      | 0.077192 | 0.080097 | 0.146142 | 515 | 515 |
| OR1E1     | 0.07724  | 0.079908 | 0.145849 | 515 | 55  |
| PLD1      | 0.077253 | 0.079858 | 0.145773 | 515 | 515 |
| ESPN      | 0.077257 | 0.079841 | 0.145767 | 515 | 515 |
| NRG3      | 0.077268 | 0.079801 | 0.145716 | 515 | 455 |
| AIG1      | 0.077295 | 0.079693 | 0.145537 | 515 | 515 |
| KLK3      | 0.077303 | 0.079662 | 0.145495 | 515 | 107 |
| NR2F2     | 0.077313 | 0.079624 | 0.14545  | 515 | 515 |
| KLHL10    | 0.077335 | 0.079537 | 0.145332 | 515 | 393 |
| OR6N1     | 0.077345 | 0.0795   | 0.145278 | 515 | 22  |
| INSM1     | 0.077348 | 0.079487 | 0.145268 | 515 | 460 |
| FLJ10357  | 0.077353 | 0.07947  | 0.145249 | 515 | 515 |
| LHB       | 0.07737  | 0.0794   | 0.145135 | 515 | 446 |
| RBM3      | 0.077386 | 0.07934  | 0.145038 | 515 | 515 |
| OR5AK2    | 0.077405 | 0.079265 | 0.144914 | 515 | 35  |
| PYGM      | 0.077412 | 0.079239 | 0.144881 | 515 | 514 |
| ZNF772    | 0.077425 | 0.079189 | 0.144815 | 515 | 515 |
| RNF216L   | 0.077446 | 0.079104 | 0.144687 | 515 | 515 |
| C6orf124  | 0.077449 | 0.079095 | 0.144683 | 515 | 515 |
| EXOSC3    | 0.077459 | 0.079054 | 0.144634 | 515 | 515 |
| C9orf85   | 0.077469 | 0.079018 | 0.144581 | 515 | 515 |
| ZNF624    | 0.077503 | 0.078887 | 0.144354 | 515 | 515 |
| AGPAT9    | 0.077518 | 0.078827 | 0.144258 | 515 | 515 |
| RTP1      | 0.077543 | 0.07873  | 0.144108 | 515 | 229 |
| TCEAL6    | 0.077618 | 0.078441 | 0.143604 | 515 | 515 |
| MRGPRX2   | 0.077655 | 0.078299 | 0.143372 | 515 | 108 |
| ZNF862    | 0.077661 | 0.078274 | 0.143339 | 515 | 515 |
| CRIM1     | 0.077684 | 0.078186 | 0.143214 | 515 | 515 |
| DHX36     | 0.077689 | 0.078168 | 0.143198 | 515 | 515 |
| HOXC4     | 0.077698 | 0.078131 | 0.143142 | 515 | 514 |
| SLC10A7   | 0.077701 | 0.07812  | 0.143134 | 515 | 515 |
| OR5B12    | 0.077765 | 0.077875 | 0.142713 | 515 | 52  |
| RSBN1L    | 0.077766 | 0.077873 | 0.142713 | 515 | 515 |
| PAM       | 0.077797 | 0.077753 | 0.142542 | 515 | 515 |
| ZG16B     | 0.077816 | 0.077679 | 0.142419 | 515 | 511 |
| PCDHB4    | 0.077829 | 0.07763  | 0.142355 | 515 | 515 |
| TRY6      | 0.077841 | 0.077583 | 0.142295 | 515 | 365 |
| GLT25D2   | 0.077841 | 0.077582 | 0.142295 | 515 | 515 |
| RAB33B    | 0.077846 | 0.077566 | 0.14229  | 515 | 515 |
| CORO2B    | 0.077853 | 0.077537 | 0.14226  | 515 | 515 |
| SRRM3     | 0.077855 | 0.077532 | 0.14226  | 515 | 515 |
| JMJD1C    | 0.077915 | 0.077303 | 0.141885 | 515 | 515 |
| RHD       | 0.077964 | 0.077113 | 0.141576 | 515 | 471 |
| GRIK5     | 0.078004 | 0.076963 | 0.141327 | 515 | 508 |
| SNAR-B2   | 0.078013 | 0.076927 | 0.141274 | 515 | 16  |
| SYNGR1    | 0.078017 | 0.076913 | 0.141261 | 515 | 515 |
| OR2AG1    | 0.078032 | 0.076856 | 0.141169 | 515 | 10  |
| MPZ       | 0.078036 | 0.076841 | 0.141166 | 515 | 515 |
| SORBS3    | 0.078054 | 0.076775 | 0.141058 | 515 | 515 |
| SMC2      | 0.078135 | 0.076466 | 0.140556 | 515 | 515 |

|           |          |          |          |     |     |
|-----------|----------|----------|----------|-----|-----|
| TSGA10    | 0.078161 | 0.076369 | 0.140404 | 515 | 515 |
| FAM183B   | 0.078181 | 0.076292 | 0.140275 | 515 | 439 |
| C7orf66   | 0.078255 | 0.076015 | 0.139843 | 515 | 5   |
| ITPKA     | 0.078287 | 0.075893 | 0.13963  | 515 | 512 |
| RARG      | 0.078297 | 0.075855 | 0.139573 | 515 | 515 |
| SCARNA1   | 0.078343 | 0.075685 | 0.139286 | 515 | 19  |
| ELANE     | 0.078362 | 0.075612 | 0.139164 | 515 | 395 |
| GALNT9    | 0.078494 | 0.07512  | 0.138362 | 515 | 366 |
| BEX2      | 0.078502 | 0.075089 | 0.138317 | 515 | 515 |
| UBTD2     | 0.078503 | 0.075088 | 0.138317 | 515 | 515 |
| C16orf81  | 0.078521 | 0.075019 | 0.138214 | 515 | 341 |
| SLC25A14  | 0.078603 | 0.074713 | 0.137778 | 515 | 515 |
| TUBB2B    | 0.078617 | 0.074664 | 0.137698 | 515 | 512 |
| DNTT      | 0.078644 | 0.074564 | 0.13754  | 515 | 163 |
| IRF3      | 0.078647 | 0.074553 | 0.137533 | 515 | 515 |
| C9orf70   | 0.078702 | 0.07435  | 0.137196 | 515 | 418 |
| ADAT1     | 0.078727 | 0.074257 | 0.13705  | 515 | 515 |
| CWH43     | 0.078729 | 0.074249 | 0.13705  | 515 | 322 |
| WNT2B     | 0.078737 | 0.07422  | 0.137019 | 515 | 515 |
| EDN1      | 0.078756 | 0.074149 | 0.136927 | 515 | 515 |
| C12orf29  | 0.078756 | 0.074148 | 0.136927 | 515 | 515 |
| ARGLU1    | 0.078797 | 0.073999 | 0.136674 | 515 | 515 |
| CAV3      | 0.078802 | 0.07398  | 0.136664 | 515 | 275 |
| SH3PXD2A  | 0.078808 | 0.073957 | 0.136635 | 515 | 515 |
| PRMT10    | 0.078818 | 0.073921 | 0.136582 | 515 | 515 |
| POLD4     | 0.078834 | 0.073862 | 0.136485 | 515 | 515 |
| HOMER1    | 0.078863 | 0.073755 | 0.136299 | 515 | 515 |
| KCNK5     | 0.078867 | 0.073743 | 0.13629  | 515 | 515 |
| ATL3      | 0.078875 | 0.073713 | 0.136247 | 515 | 515 |
| FAM138F   | 0.07889  | 0.073657 | 0.136157 | 515 | 276 |
| C11orf17  | 0.078899 | 0.073625 | 0.136123 | 515 | 515 |
| MED10     | 0.078925 | 0.073528 | 0.135967 | 515 | 515 |
| PPP1R3E   | 0.078964 | 0.073385 | 0.135728 | 515 | 515 |
| APOD      | 0.078968 | 0.073372 | 0.135717 | 515 | 515 |
| LIN52     | 0.078986 | 0.073306 | 0.135607 | 515 | 515 |
| MDP1      | 0.078989 | 0.073295 | 0.1356   | 515 | 515 |
| ZFP14     | 0.078992 | 0.073286 | 0.135595 | 515 | 515 |
| ZFYVE1    | 0.078994 | 0.073278 | 0.135594 | 515 | 515 |
| ISCA2     | 0.079003 | 0.073244 | 0.135543 | 515 | 515 |
| MEGF11    | 0.079041 | 0.073106 | 0.135313 | 515 | 498 |
| IFNA16    | 0.079052 | 0.073065 | 0.135249 | 515 | 9   |
| LOC100130 | 0.079079 | 0.072967 | 0.135095 | 515 | 515 |
| KIF15     | 0.079081 | 0.07296  | 0.135095 | 515 | 515 |
| MAGEE1    | 0.079104 | 0.072876 | 0.134962 | 515 | 515 |
| TBX2      | 0.079137 | 0.072757 | 0.134754 | 515 | 515 |
| FLJ14107  | 0.079162 | 0.072665 | 0.134611 | 515 | 386 |
| LOC146880 | 0.079203 | 0.072518 | 0.134374 | 515 | 515 |
| ZFP3      | 0.079225 | 0.072437 | 0.134261 | 515 | 515 |
| ITCH      | 0.079237 | 0.072394 | 0.134194 | 515 | 515 |
| RNU6ATAC  | 0.079241 | 0.072378 | 0.134177 | 515 | 13  |
| PCDHB9    | 0.07927  | 0.072276 | 0.134011 | 515 | 514 |
| LIMA1     | 0.079281 | 0.072237 | 0.133953 | 515 | 515 |
| ZNF611    | 0.079288 | 0.072209 | 0.133925 | 515 | 515 |
| ERO1L     | 0.079324 | 0.07208  | 0.133736 | 515 | 515 |

|           |          |          |          |     |     |
|-----------|----------|----------|----------|-----|-----|
| OR2AK2    | 0.079328 | 0.072068 | 0.133725 | 515 | 10  |
| TSPAN9    | 0.079339 | 0.072025 | 0.133658 | 515 | 515 |
| MTRR      | 0.079353 | 0.071977 | 0.133581 | 515 | 515 |
| C9orf41   | 0.079401 | 0.071804 | 0.133285 | 515 | 515 |
| FSCN3     | 0.079417 | 0.071747 | 0.133192 | 515 | 408 |
| UNC13C    | 0.079435 | 0.07168  | 0.133093 | 515 | 378 |
| PCK2      | 0.079471 | 0.071554 | 0.132884 | 515 | 515 |
| GALT      | 0.079544 | 0.071292 | 0.132443 | 515 | 515 |
| ARMC3     | 0.079577 | 0.071176 | 0.132254 | 515 | 496 |
| LOC153910 | 0.079614 | 0.071043 | 0.13207  | 515 | 263 |
| CRYZL1    | 0.079698 | 0.070743 | 0.131597 | 515 | 515 |
| SUGT1P1   | 0.079723 | 0.070657 | 0.131473 | 515 | 501 |
| TNNT3     | 0.079734 | 0.070615 | 0.131433 | 515 | 352 |
| PRHOXNB   | 0.079741 | 0.07059  | 0.131399 | 515 | 4   |
| FBXO31    | 0.079748 | 0.070567 | 0.131368 | 515 | 515 |
| GLIS3     | 0.079754 | 0.070547 | 0.131343 | 515 | 515 |
| C6orf25   | 0.079756 | 0.070538 | 0.131338 | 515 | 284 |
| PNMA1     | 0.079759 | 0.070527 | 0.13133  | 515 | 515 |
| SMC4      | 0.079768 | 0.070498 | 0.131287 | 515 | 515 |
| SERPINB7  | 0.07977  | 0.07049  | 0.131285 | 515 | 399 |
| HBG2      | 0.079776 | 0.070467 | 0.131254 | 515 | 272 |
| OR1G1     | 0.079794 | 0.070404 | 0.131161 | 515 | 46  |
| NCRNA0017 | 0.079794 | 0.070403 | 0.131161 | 515 | 515 |
| HAT1      | 0.079811 | 0.070343 | 0.131084 | 515 | 515 |
| LOC728855 | 0.079819 | 0.070315 | 0.131045 | 515 | 515 |
| C4orf22   | 0.079834 | 0.070265 | 0.130975 | 515 | 322 |
| PCDHGA5   | 0.079878 | 0.070109 | 0.130722 | 515 | 513 |
| RNF114    | 0.07988  | 0.070101 | 0.13072  | 515 | 515 |
| FAIM2     | 0.079924 | 0.069945 | 0.130441 | 515 | 514 |
| RAB40A    | 0.079935 | 0.069907 | 0.130394 | 515 | 510 |
| LTBP1     | 0.079947 | 0.069865 | 0.130327 | 515 | 515 |
| PLEKHM1   | 0.079961 | 0.069817 | 0.130263 | 515 | 515 |
| ASCC3     | 0.079973 | 0.069774 | 0.130226 | 515 | 515 |
| CXorf30   | 0.079974 | 0.069771 | 0.130226 | 515 | 396 |
| C9orf6    | 0.080036 | 0.069555 | 0.129918 | 515 | 515 |
| STXBP5    | 0.080074 | 0.06942  | 0.129716 | 515 | 515 |
| CST2      | 0.080089 | 0.06937  | 0.129647 | 515 | 499 |
| KDM6A     | 0.080089 | 0.069368 | 0.129647 | 515 | 515 |
| LIN54     | 0.080091 | 0.069361 | 0.129647 | 515 | 515 |
| MAB21L2   | 0.0801   | 0.069329 | 0.129607 | 515 | 295 |
| TMEM231   | 0.080118 | 0.069266 | 0.129513 | 515 | 515 |
| SLC35D1   | 0.080124 | 0.069248 | 0.129492 | 515 | 515 |
| GJB4      | 0.080139 | 0.069193 | 0.129412 | 515 | 452 |
| FAM155A   | 0.080161 | 0.069117 | 0.129294 | 515 | 513 |
| SLC7A6OS  | 0.080179 | 0.069054 | 0.129189 | 515 | 515 |
| CERCAM    | 0.080186 | 0.069031 | 0.129171 | 515 | 515 |
| ITGA11    | 0.080227 | 0.06889  | 0.128942 | 515 | 515 |
| ESCO2     | 0.080254 | 0.068795 | 0.128777 | 515 | 515 |
| MVP       | 0.080335 | 0.068515 | 0.1283   | 515 | 515 |
| GTF2A1    | 0.080351 | 0.068459 | 0.128208 | 515 | 515 |
| BEND5     | 0.080362 | 0.06842  | 0.12817  | 515 | 515 |
| CAPRIN2   | 0.08038  | 0.06836  | 0.128095 | 515 | 515 |
| OR10P1    | 0.08038  | 0.068359 | 0.128095 | 515 | 19  |
| MTF1      | 0.080401 | 0.068288 | 0.128006 | 515 | 515 |

|           |          |          |          |     |     |
|-----------|----------|----------|----------|-----|-----|
| REEP1     | 0.080423 | 0.068212 | 0.127901 | 515 | 515 |
| OR10A2    | 0.080584 | 0.06766  | 0.126938 | 515 | 51  |
| LMO3      | 0.080624 | 0.067521 | 0.126713 | 515 | 515 |
| SMARCA1   | 0.080632 | 0.067494 | 0.126673 | 515 | 515 |
| LOC728276 | 0.080638 | 0.067476 | 0.126651 | 515 | 162 |
| WDR17     | 0.080698 | 0.06727  | 0.126312 | 515 | 512 |
| KRCC1     | 0.080785 | 0.066974 | 0.125862 | 515 | 515 |
| TRAK2     | 0.080824 | 0.066842 | 0.125638 | 515 | 515 |
| VPS13B    | 0.080928 | 0.066493 | 0.125052 | 515 | 515 |
| XKR9      | 0.080995 | 0.066265 | 0.124648 | 515 | 513 |
| LOC285796 | 0.080996 | 0.066261 | 0.124648 | 515 | 199 |
| C18orf20  | 0.081    | 0.066249 | 0.12464  | 515 | 93  |
| SNX31     | 0.081019 | 0.066184 | 0.124535 | 515 | 320 |
| IER2      | 0.081083 | 0.065971 | 0.124188 | 515 | 515 |
| ZNF295    | 0.081084 | 0.065966 | 0.124188 | 515 | 515 |
| ARL8B     | 0.081159 | 0.065717 | 0.123746 | 515 | 515 |
| ACTC1     | 0.081165 | 0.065695 | 0.123716 | 515 | 441 |
| TRIM35    | 0.081206 | 0.065561 | 0.123498 | 515 | 515 |
| CDH2      | 0.081227 | 0.065489 | 0.123385 | 515 | 514 |
| GABBR1    | 0.081234 | 0.065465 | 0.123352 | 515 | 515 |
| SCARNA17  | 0.081246 | 0.065426 | 0.12329  | 515 | 505 |
| UNC119    | 0.081248 | 0.065419 | 0.123289 | 515 | 515 |
| MLANA     | 0.081266 | 0.065361 | 0.123214 | 515 | 379 |
| PCTP      | 0.081275 | 0.065331 | 0.12318  | 515 | 515 |
| ADAMTS17  | 0.081303 | 0.065238 | 0.12303  | 515 | 515 |
| OR1K1     | 0.081314 | 0.065202 | 0.122983 | 515 | 97  |
| ERCC8     | 0.08132  | 0.065181 | 0.122967 | 515 | 515 |
| SLC41A2   | 0.081381 | 0.064978 | 0.12263  | 515 | 515 |
| TRIM15    | 0.081387 | 0.064958 | 0.122612 | 515 | 393 |
| BCL2L15   | 0.081394 | 0.064936 | 0.122598 | 515 | 515 |
| ZNF404    | 0.081438 | 0.06479  | 0.122379 | 515 | 515 |
| DCHS2     | 0.081477 | 0.064662 | 0.122172 | 515 | 504 |
| CTRB2     | 0.081485 | 0.064636 | 0.122135 | 515 | 179 |
| KCNN2     | 0.081514 | 0.064542 | 0.121968 | 515 | 513 |
| COBL      | 0.081536 | 0.064468 | 0.121852 | 515 | 515 |
| GTF2H3    | 0.081564 | 0.064377 | 0.121703 | 515 | 515 |
| RASSF6    | 0.081571 | 0.064355 | 0.121684 | 515 | 515 |
| TMEM87B   | 0.081611 | 0.064222 | 0.121457 | 515 | 515 |
| LOC554202 | 0.081616 | 0.064206 | 0.121448 | 515 | 456 |
| BTNL8     | 0.081719 | 0.06387  | 0.120858 | 515 | 479 |
| LOC654433 | 0.081726 | 0.063847 | 0.120827 | 515 | 515 |
| CASC5     | 0.081729 | 0.063836 | 0.120817 | 515 | 515 |
| TSSK4     | 0.081756 | 0.063748 | 0.120685 | 515 | 514 |
| TREML4    | 0.081764 | 0.063724 | 0.120651 | 515 | 389 |
| PNPLA1    | 0.081769 | 0.063707 | 0.120631 | 515 | 430 |
| HOXD3     | 0.081774 | 0.06369  | 0.12061  | 515 | 484 |
| DENND2A   | 0.081805 | 0.063589 | 0.120466 | 515 | 515 |
| JMJD5     | 0.081808 | 0.063578 | 0.120466 | 515 | 515 |
| MAD2L2    | 0.081814 | 0.06356  | 0.120443 | 515 | 515 |
| RAMP1     | 0.081827 | 0.063518 | 0.120375 | 515 | 515 |
| SNORA63   | 0.081855 | 0.063426 | 0.120224 | 515 | 301 |
| SPATA18   | 0.081863 | 0.063401 | 0.1202   | 515 | 515 |
| PKP2      | 0.081863 | 0.0634   | 0.1202   | 515 | 515 |
| MDM1      | 0.0819   | 0.06328  | 0.12001  | 515 | 515 |

|           |          |          |          |     |     |
|-----------|----------|----------|----------|-----|-----|
| ZGLP1     | 0.081919 | 0.063219 | 0.119926 | 515 | 515 |
| PDCL      | 0.081953 | 0.063111 | 0.119773 | 515 | 515 |
| 15-Sep    | 0.081966 | 0.063069 | 0.119709 | 515 | 515 |
| TMEM127   | 0.082006 | 0.062939 | 0.119494 | 515 | 515 |
| MAP4      | 0.082011 | 0.062921 | 0.119471 | 515 | 515 |
| SNAP25    | 0.082018 | 0.062899 | 0.11944  | 515 | 515 |
| ATP2B4    | 0.082033 | 0.06285  | 0.119359 | 515 | 515 |
| SATB1     | 0.082041 | 0.062826 | 0.119324 | 515 | 515 |
| ZNRF2     | 0.082068 | 0.062741 | 0.119184 | 515 | 515 |
| PDLIM5    | 0.082071 | 0.06273  | 0.119175 | 515 | 515 |
| GALNTL1   | 0.082104 | 0.062623 | 0.119017 | 515 | 514 |
| DPP6      | 0.082106 | 0.062618 | 0.119017 | 515 | 483 |
| TTF2      | 0.082122 | 0.062565 | 0.118929 | 515 | 515 |
| UBA52     | 0.082141 | 0.062505 | 0.118828 | 515 | 515 |
| CUL1      | 0.082145 | 0.062492 | 0.118813 | 515 | 515 |
| UBXN11    | 0.08218  | 0.06238  | 0.118647 | 515 | 515 |
| COL7A1    | 0.082185 | 0.062363 | 0.118625 | 515 | 515 |
| PCOLCE2   | 0.082222 | 0.062247 | 0.118416 | 515 | 514 |
| CALU      | 0.082234 | 0.062208 | 0.118353 | 515 | 515 |
| IGFN1     | 0.082278 | 0.062068 | 0.118153 | 515 | 461 |
| C1orf189  | 0.082312 | 0.06196  | 0.117959 | 515 | 298 |
| KIAA0776  | 0.082344 | 0.061857 | 0.117803 | 515 | 515 |
| ME3       | 0.082351 | 0.061837 | 0.117781 | 515 | 515 |
| EDA2R     | 0.082352 | 0.061832 | 0.117781 | 515 | 514 |
| TMEM203   | 0.082395 | 0.061695 | 0.117555 | 515 | 515 |
| PDE6H     | 0.082407 | 0.061659 | 0.117499 | 515 | 117 |
| SPRR1A    | 0.082408 | 0.061654 | 0.117499 | 515 | 353 |
| MOBP      | 0.082479 | 0.061431 | 0.117098 | 515 | 461 |
| ASF1B     | 0.082508 | 0.061339 | 0.116932 | 515 | 515 |
| CALCR     | 0.08251  | 0.061334 | 0.116932 | 515 | 491 |
| CCDC116   | 0.08252  | 0.061301 | 0.116884 | 515 | 477 |
| SFRS7     | 0.082526 | 0.061281 | 0.116857 | 515 | 515 |
| IKBK      | 0.082537 | 0.061246 | 0.116801 | 515 | 515 |
| PROX1     | 0.082542 | 0.061233 | 0.116786 | 515 | 507 |
| NEK10     | 0.082615 | 0.061003 | 0.116425 | 515 | 500 |
| RPL32P3   | 0.082658 | 0.060866 | 0.116209 | 515 | 515 |
| CDC14B    | 0.082692 | 0.060761 | 0.116031 | 515 | 515 |
| SS18L2    | 0.082758 | 0.060556 | 0.115671 | 515 | 515 |
| SLC22A8   | 0.082764 | 0.060534 | 0.115642 | 515 | 71  |
| MGC16142  | 0.082772 | 0.06051  | 0.115607 | 515 | 515 |
| NSUN3     | 0.082778 | 0.060492 | 0.115583 | 515 | 515 |
| NCAPH     | 0.082815 | 0.060377 | 0.115385 | 515 | 515 |
| SCD5      | 0.082817 | 0.06037  | 0.115385 | 515 | 515 |
| WHAMML2   | 0.082833 | 0.060319 | 0.115308 | 515 | 514 |
| NPAS4     | 0.082835 | 0.060315 | 0.115308 | 515 | 339 |
| SERPINE3  | 0.082838 | 0.060305 | 0.115304 | 515 | 175 |
| ARHGAP27  | 0.082843 | 0.060291 | 0.115298 | 515 | 515 |
| MELK      | 0.082845 | 0.060284 | 0.115296 | 515 | 515 |
| LRRTM1    | 0.082845 | 0.060282 | 0.115296 | 515 | 365 |
| DCP1A     | 0.082879 | 0.060177 | 0.115113 | 515 | 515 |
| LCN6      | 0.082899 | 0.060115 | 0.115018 | 515 | 201 |
| PPP1CC    | 0.082907 | 0.06009  | 0.114979 | 515 | 515 |
| KCNC3     | 0.082933 | 0.060009 | 0.114836 | 515 | 515 |
| LOC100128 | 0.082935 | 0.060003 | 0.114835 | 515 | 195 |



|          |          |          |          |     |     |
|----------|----------|----------|----------|-----|-----|
| PLEKHB2  | 0.08295  | 0.059957 | 0.114781 | 515 | 515 |
| SNORA7B  | 0.082964 | 0.059915 | 0.114711 | 515 | 501 |
| C3orf62  | 0.082983 | 0.059857 | 0.11461  | 515 | 515 |
| MORN3    | 0.083069 | 0.05959  | 0.114155 | 515 | 512 |
| OCM      | 0.083077 | 0.059564 | 0.114116 | 515 | 392 |
| CCDC132  | 0.083079 | 0.059561 | 0.114116 | 515 | 515 |
| ZNF121   | 0.083089 | 0.059528 | 0.114068 | 515 | 515 |
| LRR1Q3   | 0.08318  | 0.05925  | 0.113622 | 515 | 500 |
| TYMS     | 0.08318  | 0.05925  | 0.113622 | 515 | 515 |
| CLDN15   | 0.083192 | 0.059214 | 0.113587 | 515 | 515 |
| APLP1    | 0.083202 | 0.059182 | 0.113547 | 515 | 515 |
| ARL5B    | 0.083248 | 0.059043 | 0.113302 | 515 | 515 |
| MAD2L1   | 0.083256 | 0.059016 | 0.113262 | 515 | 515 |
| CES3     | 0.083279 | 0.058946 | 0.113148 | 515 | 515 |
| ZNF567   | 0.083294 | 0.058901 | 0.113095 | 515 | 515 |
| ARL4D    | 0.083321 | 0.058817 | 0.112945 | 515 | 515 |
| NAT1     | 0.083323 | 0.058811 | 0.112944 | 515 | 515 |
| HEATR3   | 0.083342 | 0.058755 | 0.112868 | 515 | 515 |
| MASP2    | 0.083367 | 0.058679 | 0.112755 | 515 | 514 |
| SH3TC2   | 0.083395 | 0.058593 | 0.11261  | 515 | 513 |
| SNPH     | 0.083402 | 0.058573 | 0.112584 | 515 | 515 |
| AP2M1    | 0.083429 | 0.05849  | 0.112468 | 515 | 515 |
| CKS2     | 0.083441 | 0.058453 | 0.112412 | 515 | 515 |
| FAM127C  | 0.083451 | 0.058422 | 0.112381 | 515 | 515 |
| TMED7    | 0.083472 | 0.058359 | 0.112292 | 515 | 515 |
| RFESD    | 0.083523 | 0.058205 | 0.112071 | 515 | 515 |
| SLC12A1  | 0.08353  | 0.058186 | 0.112044 | 515 | 264 |
| LYSMD3   | 0.083576 | 0.058047 | 0.111809 | 515 | 515 |
| ZNF566   | 0.083594 | 0.057992 | 0.111756 | 515 | 515 |
| OR7G3    | 0.083604 | 0.057961 | 0.111707 | 515 | 4   |
| REEP5    | 0.083675 | 0.057748 | 0.111373 | 515 | 515 |
| HNF4G    | 0.083708 | 0.057651 | 0.111228 | 515 | 513 |
| TMIGD1   | 0.083729 | 0.057588 | 0.111128 | 515 | 39  |
| C9orf117 | 0.083759 | 0.057496 | 0.110983 | 515 | 508 |
| CLCN4    | 0.083809 | 0.057349 | 0.110741 | 515 | 515 |
| MGEA5    | 0.083817 | 0.057325 | 0.110717 | 515 | 515 |
| C12orf11 | 0.083823 | 0.057305 | 0.11069  | 515 | 515 |
| ADAMTS10 | 0.083872 | 0.057159 | 0.110472 | 515 | 515 |
| B3GAT2   | 0.08389  | 0.057105 | 0.110378 | 515 | 514 |
| ZNF436   | 0.083891 | 0.057105 | 0.110378 | 515 | 515 |
| C17orf72 | 0.083901 | 0.057074 | 0.110339 | 515 | 515 |
| PRELID2  | 0.083929 | 0.056992 | 0.110201 | 515 | 515 |
| SYT16    | 0.083961 | 0.056896 | 0.11006  | 515 | 387 |
| H2AFB1   | 0.083966 | 0.05688  | 0.110038 | 515 | 415 |
| TMPRSS3  | 0.083996 | 0.056791 | 0.109888 | 515 | 515 |
| CHMP2B   | 0.084042 | 0.056655 | 0.109645 | 515 | 515 |
| OR5M1    | 0.084065 | 0.056589 | 0.109529 | 515 | 5   |
| LRRN1    | 0.084099 | 0.056489 | 0.109377 | 515 | 515 |
| TMEM200C | 0.084113 | 0.056445 | 0.109314 | 515 | 503 |
| ASTL     | 0.084137 | 0.056376 | 0.109191 | 515 | 379 |
| FOSL2    | 0.084144 | 0.056356 | 0.109172 | 515 | 515 |
| OR52H1   | 0.084172 | 0.056272 | 0.109042 | 515 | 58  |
| DEPDC1B  | 0.084199 | 0.056193 | 0.10891  | 515 | 515 |
| AP4E1    | 0.084208 | 0.056168 | 0.108872 | 515 | 515 |

|           |          |          |          |     |     |
|-----------|----------|----------|----------|-----|-----|
| GUCA1B    | 0.084212 | 0.056157 | 0.108861 | 515 | 515 |
| AWAT1     | 0.084226 | 0.056115 | 0.108791 | 515 | 134 |
| AZGP1     | 0.084256 | 0.056028 | 0.108632 | 515 | 514 |
| KRT27     | 0.084256 | 0.056027 | 0.108632 | 515 | 360 |
| TDRD9     | 0.084262 | 0.056009 | 0.108615 | 515 | 512 |
| STIM1     | 0.084331 | 0.055809 | 0.10826  | 515 | 515 |
| C7orf33   | 0.084332 | 0.055805 | 0.10826  | 515 | 66  |
| C4orf29   | 0.084365 | 0.055709 | 0.108128 | 515 | 515 |
| HEBP1     | 0.084412 | 0.055573 | 0.107886 | 515 | 515 |
| PITPNB    | 0.084414 | 0.055567 | 0.107885 | 515 | 515 |
| WDR67     | 0.084416 | 0.055562 | 0.107885 | 515 | 515 |
| RHOXF1    | 0.084442 | 0.055484 | 0.107755 | 515 | 344 |
| C8orf31   | 0.084458 | 0.055438 | 0.107676 | 515 | 513 |
| TRIM5     | 0.084482 | 0.05537  | 0.107565 | 515 | 515 |
| TMEM66    | 0.0845   | 0.055317 | 0.107472 | 515 | 515 |
| RNF160    | 0.084555 | 0.055159 | 0.107186 | 515 | 515 |
| FKBP14    | 0.084555 | 0.055158 | 0.107186 | 515 | 515 |
| HYMAI     | 0.084577 | 0.055094 | 0.107081 | 515 | 416 |
| MC4R      | 0.084585 | 0.055072 | 0.107048 | 515 | 366 |
| LYRM1     | 0.084589 | 0.055059 | 0.107034 | 515 | 515 |
| VPREB1    | 0.084593 | 0.055047 | 0.10702  | 515 | 50  |
| SEMA6A    | 0.084597 | 0.055038 | 0.107013 | 515 | 515 |
| USPL1     | 0.084622 | 0.054965 | 0.106883 | 515 | 515 |
| CHAC2     | 0.084627 | 0.054951 | 0.106864 | 515 | 515 |
| COMMD1    | 0.084635 | 0.054926 | 0.106838 | 515 | 515 |
| ASXL2     | 0.084639 | 0.054917 | 0.10683  | 515 | 515 |
| ZNF274    | 0.084656 | 0.054868 | 0.106756 | 515 | 515 |
| ADCY5     | 0.084669 | 0.05483  | 0.106692 | 515 | 513 |
| C2orf84   | 0.08468  | 0.054799 | 0.106643 | 515 | 496 |
| SFI1      | 0.084685 | 0.054784 | 0.106624 | 515 | 515 |
| TLR5      | 0.084713 | 0.054703 | 0.106508 | 515 | 515 |
| C11orf75  | 0.084766 | 0.054552 | 0.106255 | 515 | 515 |
| GTPBP10   | 0.084798 | 0.054461 | 0.106137 | 515 | 515 |
| TAS2R31   | 0.084809 | 0.054427 | 0.106083 | 515 | 440 |
| SLC16A3   | 0.084838 | 0.054345 | 0.105933 | 515 | 515 |
| COQ2      | 0.084918 | 0.054117 | 0.105583 | 515 | 515 |
| TMEM220   | 0.08495  | 0.054027 | 0.105438 | 515 | 515 |
| SLC45A3   | 0.084958 | 0.054005 | 0.105406 | 515 | 515 |
| TMC2      | 0.084972 | 0.053964 | 0.105345 | 515 | 425 |
| HS3ST4    | 0.084979 | 0.053944 | 0.105318 | 515 | 225 |
| C9orf30   | 0.085018 | 0.053835 | 0.10512  | 515 | 515 |
| C9orf135  | 0.085025 | 0.053815 | 0.105096 | 515 | 446 |
| OR2L13    | 0.085039 | 0.053775 | 0.105027 | 515 | 121 |
| C3orf43   | 0.085065 | 0.053702 | 0.104905 | 515 | 219 |
| C10orf119 | 0.085066 | 0.053699 | 0.104905 | 515 | 515 |
| DPP9      | 0.085116 | 0.053557 | 0.104663 | 515 | 515 |
| MYL7      | 0.085201 | 0.053318 | 0.104246 | 515 | 36  |
| PNMA6A    | 0.085215 | 0.053278 | 0.104179 | 515 | 515 |
| TMEM39A   | 0.085253 | 0.053173 | 0.104016 | 515 | 515 |
| ANGEL1    | 0.085258 | 0.053158 | 0.103995 | 515 | 515 |
| MMP10     | 0.085259 | 0.053154 | 0.103995 | 515 | 503 |
| DNMT1     | 0.085347 | 0.052908 | 0.103578 | 515 | 515 |
| BNC1      | 0.08537  | 0.052845 | 0.103474 | 515 | 445 |
| HTR1F     | 0.085439 | 0.052653 | 0.103119 | 515 | 504 |

|           |          |          |          |     |     |
|-----------|----------|----------|----------|-----|-----|
| ESAM      | 0.085494 | 0.0525   | 0.10284  | 515 | 515 |
| CIR1      | 0.08552  | 0.052428 | 0.102729 | 515 | 515 |
| BARD1     | 0.085524 | 0.052417 | 0.102727 | 515 | 515 |
| BMP5      | 0.085585 | 0.052249 | 0.102469 | 515 | 508 |
| ZNF277    | 0.085712 | 0.051898 | 0.101857 | 515 | 515 |
| LOC220594 | 0.085725 | 0.051865 | 0.101805 | 515 | 515 |
| ARL6IP6   | 0.085741 | 0.051821 | 0.101729 | 515 | 515 |
| C1RL      | 0.085741 | 0.051821 | 0.101729 | 515 | 515 |
| C10orf84  | 0.085788 | 0.05169  | 0.101511 | 515 | 515 |
| RNPC3     | 0.085818 | 0.05161  | 0.101373 | 515 | 515 |
| EIF4G2    | 0.085849 | 0.051525 | 0.101228 | 515 | 515 |
| SCARB2    | 0.085874 | 0.051456 | 0.101111 | 515 | 515 |
| PIAS1     | 0.085879 | 0.051442 | 0.101094 | 515 | 515 |
| TMEM40    | 0.08589  | 0.051413 | 0.101065 | 515 | 487 |
| TRAPPC10  | 0.0859   | 0.051387 | 0.101035 | 515 | 515 |
| KIAA1632  | 0.085926 | 0.051314 | 0.100912 | 515 | 515 |
| C4BPA     | 0.085958 | 0.051227 | 0.100775 | 515 | 514 |
| PLEKHG4   | 0.085992 | 0.051134 | 0.100627 | 515 | 515 |
| ZNF853    | 0.086009 | 0.051089 | 0.100558 | 515 | 515 |
| AVPR2     | 0.086063 | 0.050944 | 0.100302 | 515 | 508 |
| IFNK      | 0.086071 | 0.050923 | 0.10027  | 515 | 73  |
| LRRC52    | 0.086108 | 0.050822 | 0.100091 | 515 | 394 |
| MFRP      | 0.086114 | 0.050807 | 0.100082 | 515 | 515 |
| PCDP1     | 0.086133 | 0.050755 | 0.099989 | 515 | 512 |
| KCNH7     | 0.086151 | 0.050706 | 0.099912 | 515 | 375 |
| ZFP106    | 0.086153 | 0.050701 | 0.099912 | 515 | 515 |
| HRASLS    | 0.086169 | 0.050657 | 0.099835 | 515 | 500 |
| B3GNT5    | 0.086179 | 0.05063  | 0.099791 | 515 | 515 |
| DYDC1     | 0.086183 | 0.05062  | 0.099783 | 515 | 363 |
| MBOAT1    | 0.086203 | 0.050566 | 0.099686 | 515 | 515 |
| TOMM40L   | 0.086229 | 0.050496 | 0.099558 | 515 | 515 |
| HELLS     | 0.086257 | 0.050422 | 0.099432 | 515 | 515 |
| ZNF584    | 0.086258 | 0.050418 | 0.099432 | 515 | 515 |
| LOC389705 | 0.086265 | 0.050398 | 0.099404 | 515 | 492 |
| GPN1      | 0.086289 | 0.050334 | 0.099298 | 515 | 515 |
| ZNF155    | 0.086308 | 0.050285 | 0.09922  | 515 | 515 |
| MT01      | 0.086316 | 0.050262 | 0.099184 | 515 | 515 |
| TAGLN3    | 0.086318 | 0.050259 | 0.099184 | 515 | 362 |
| PDGFB     | 0.086365 | 0.050132 | 0.098947 | 515 | 515 |
| BCL11A    | 0.086382 | 0.050088 | 0.09887  | 515 | 515 |
| ANKRD34A  | 0.086393 | 0.050057 | 0.098829 | 515 | 514 |
| ARIH2     | 0.086396 | 0.050049 | 0.098822 | 515 | 515 |
| PCGEM1    | 0.0864   | 0.050038 | 0.09881  | 515 | 13  |
| FMN1      | 0.086412 | 0.050007 | 0.098759 | 515 | 515 |
| FAM116A   | 0.086415 | 0.049998 | 0.098752 | 515 | 515 |
| C9orf78   | 0.086459 | 0.049883 | 0.098573 | 515 | 515 |
| RPS3A     | 0.086538 | 0.049673 | 0.098215 | 515 | 515 |
| ITGB1BP1  | 0.086556 | 0.049625 | 0.098131 | 515 | 515 |
| MTDH      | 0.086606 | 0.049493 | 0.097889 | 515 | 515 |
| C19orf75  | 0.08661  | 0.049482 | 0.097877 | 515 | 53  |
| C14orf115 | 0.086623 | 0.049449 | 0.097822 | 515 | 190 |
| FUCA2     | 0.086629 | 0.049433 | 0.097814 | 515 | 515 |
| MYSM1     | 0.086636 | 0.049414 | 0.097791 | 515 | 515 |
| PCDHGB3   | 0.086649 | 0.04938  | 0.097733 | 515 | 504 |

|           |          |          |          |     |     |
|-----------|----------|----------|----------|-----|-----|
| SLC25A36  | 0.086663 | 0.049344 | 0.097679 | 515 | 515 |
| FBN2      | 0.086691 | 0.04927  | 0.097573 | 515 | 512 |
| C17orf49  | 0.086702 | 0.04924  | 0.097524 | 515 | 515 |
| LRCH3     | 0.086704 | 0.049235 | 0.097523 | 515 | 515 |
| XYLT1     | 0.086724 | 0.049183 | 0.097431 | 515 | 515 |
| VPS29     | 0.086725 | 0.049181 | 0.097431 | 515 | 515 |
| TRIM44    | 0.08682  | 0.048932 | 0.096982 | 515 | 515 |
| ZNF187    | 0.086857 | 0.048834 | 0.096806 | 515 | 515 |
| TRPC6     | 0.086884 | 0.048763 | 0.096685 | 515 | 515 |
| C4orf31   | 0.086897 | 0.048729 | 0.096637 | 515 | 515 |
| NCALD     | 0.086933 | 0.048638 | 0.096474 | 515 | 515 |
| C18orf16  | 0.086958 | 0.048572 | 0.096364 | 515 | 399 |
| SEC14L2   | 0.086965 | 0.048553 | 0.096336 | 515 | 515 |
| KGFLP2    | 0.086986 | 0.0485   | 0.096239 | 515 | 515 |
| ZSCAN23   | 0.087001 | 0.04846  | 0.096169 | 515 | 507 |
| WDR65     | 0.087019 | 0.048413 | 0.096096 | 515 | 489 |
| TTC9C     | 0.08702  | 0.04841  | 0.096096 | 515 | 515 |
| MEG3      | 0.087034 | 0.048374 | 0.096036 | 515 | 514 |
| KCNN1     | 0.087036 | 0.04837  | 0.096036 | 515 | 496 |
| MCF2L2    | 0.087097 | 0.048212 | 0.095773 | 515 | 514 |
| C7orf16   | 0.087125 | 0.048139 | 0.095646 | 515 | 255 |
| NAMPT     | 0.087128 | 0.048131 | 0.09564  | 515 | 515 |
| PRG2      | 0.087141 | 0.048099 | 0.095586 | 515 | 514 |
| CCDC11    | 0.087153 | 0.048067 | 0.095532 | 515 | 514 |
| CGB7      | 0.087166 | 0.048034 | 0.095475 | 515 | 488 |
| LOC402377 | 0.087172 | 0.048019 | 0.095455 | 515 | 514 |
| EXTL1     | 0.087266 | 0.047777 | 0.09505  | 515 | 511 |
| ING3      | 0.087275 | 0.047754 | 0.095024 | 515 | 515 |
| CD99      | 0.087313 | 0.047658 | 0.09486  | 515 | 515 |
| RBP2      | 0.087323 | 0.047631 | 0.094826 | 515 | 322 |
| CCDC74A   | 0.087416 | 0.047394 | 0.094419 | 515 | 515 |
| GPR77     | 0.087448 | 0.047312 | 0.094266 | 515 | 514 |
| SOX10     | 0.087526 | 0.047115 | 0.093892 | 515 | 312 |
| PCDHGA11  | 0.087542 | 0.047075 | 0.093821 | 515 | 514 |
| ZNF823    | 0.087545 | 0.047067 | 0.093816 | 515 | 515 |
| ATP6V1G2  | 0.08758  | 0.046978 | 0.093647 | 515 | 515 |
| C7orf29   | 0.087611 | 0.046899 | 0.093508 | 515 | 515 |
| PDE10A    | 0.087679 | 0.046728 | 0.093186 | 515 | 515 |
| LOC150527 | 0.087692 | 0.046696 | 0.09316  | 515 | 42  |
| LOC145783 | 0.0877   | 0.046677 | 0.09313  | 515 | 515 |
| RAPSN     | 0.087721 | 0.046624 | 0.093035 | 515 | 421 |
| LRIT2     | 0.087749 | 0.046553 | 0.092901 | 515 | 57  |
| AKAP11    | 0.087754 | 0.046541 | 0.092886 | 515 | 515 |
| TTC5      | 0.087791 | 0.046449 | 0.09274  | 515 | 515 |
| NT5C3     | 0.087835 | 0.046338 | 0.092546 | 515 | 515 |
| LOC286367 | 0.087855 | 0.046288 | 0.092465 | 515 | 515 |
| CDK1      | 0.087877 | 0.046234 | 0.092372 | 515 | 515 |
| TRIM52    | 0.087955 | 0.046039 | 0.092032 | 515 | 515 |
| NPBWR1    | 0.087961 | 0.046025 | 0.092013 | 515 | 299 |
| LOC144742 | 0.088044 | 0.045819 | 0.091637 | 515 | 37  |
| ST3GAL5   | 0.088058 | 0.045785 | 0.091579 | 515 | 515 |
| MED28     | 0.088061 | 0.045776 | 0.091571 | 515 | 515 |
| ADAMTS9   | 0.088071 | 0.045751 | 0.091539 | 515 | 515 |
| EZH2      | 0.088136 | 0.045592 | 0.091258 | 515 | 515 |

|           |          |          |          |     |     |
|-----------|----------|----------|----------|-----|-----|
| ZNF727    | 0.088137 | 0.045588 | 0.091258 | 515 | 466 |
| AMY2A     | 0.088162 | 0.045526 | 0.09118  | 515 | 487 |
| LOC283922 | 0.088214 | 0.0454   | 0.090946 | 515 | 515 |
| TSTD2     | 0.088215 | 0.045398 | 0.090946 | 515 | 515 |
| STAT6     | 0.088226 | 0.045369 | 0.090902 | 515 | 515 |
| TSPYL1    | 0.088283 | 0.04523  | 0.090669 | 515 | 515 |
| GCM1      | 0.088332 | 0.04511  | 0.090447 | 515 | 472 |
| HNRNPH1   | 0.088333 | 0.045107 | 0.090447 | 515 | 515 |
| STARD7    | 0.088352 | 0.045062 | 0.090387 | 515 | 515 |
| GPR45     | 0.088366 | 0.045028 | 0.090326 | 515 | 293 |
| FAM181A   | 0.088366 | 0.045027 | 0.090326 | 515 | 438 |
| KLC3      | 0.088374 | 0.045008 | 0.090305 | 515 | 515 |
| BRI3      | 0.088381 | 0.044993 | 0.090292 | 515 | 515 |
| TMEM218   | 0.088399 | 0.044947 | 0.090211 | 515 | 515 |
| FAM110B   | 0.088408 | 0.044926 | 0.090185 | 515 | 515 |
| ZFYVE16   | 0.088408 | 0.044925 | 0.090185 | 515 | 515 |
| HMG2      | 0.088511 | 0.044677 | 0.089774 | 515 | 515 |
| LRGUK     | 0.088588 | 0.044491 | 0.089473 | 515 | 501 |
| G3BP2     | 0.088588 | 0.044488 | 0.089473 | 515 | 515 |
| OR6B1     | 0.088643 | 0.044356 | 0.089221 | 515 | 7   |
| MICALCL   | 0.088678 | 0.044272 | 0.089061 | 515 | 515 |
| C5orf36   | 0.088691 | 0.044241 | 0.089025 | 515 | 515 |
| C3orf31   | 0.088702 | 0.044216 | 0.088993 | 515 | 515 |
| HPCAL4    | 0.088738 | 0.044128 | 0.088825 | 515 | 503 |
| LOC100128 | 0.088756 | 0.044087 | 0.088769 | 515 | 472 |
| PTENP1    | 0.088802 | 0.043976 | 0.088555 | 515 | 515 |
| OSMR      | 0.08887  | 0.043814 | 0.088255 | 515 | 515 |
| SAAL1     | 0.088876 | 0.043798 | 0.088232 | 515 | 515 |
| GLIS1     | 0.088887 | 0.043773 | 0.088191 | 515 | 468 |
| ELFN2     | 0.088925 | 0.043684 | 0.088028 | 515 | 514 |
| GTF2H2C   | 0.088938 | 0.043651 | 0.087971 | 515 | 515 |
| ZNF432    | 0.088983 | 0.043545 | 0.087784 | 515 | 515 |
| TRPV4     | 0.089021 | 0.043455 | 0.087629 | 515 | 515 |
| SPRED3    | 0.089049 | 0.043389 | 0.087514 | 515 | 435 |
| ENC1      | 0.089071 | 0.043338 | 0.087419 | 515 | 515 |
| OR8K3     | 0.089072 | 0.043335 | 0.087419 | 515 | 8   |
| COL4A3    | 0.089091 | 0.04329  | 0.08735  | 515 | 513 |
| CRH       | 0.089128 | 0.043202 | 0.087199 | 515 | 171 |
| EXOC3L    | 0.089133 | 0.043192 | 0.087186 | 515 | 514 |
| SNTG2     | 0.089156 | 0.043136 | 0.087082 | 515 | 270 |
| ZNF417    | 0.089187 | 0.043064 | 0.086954 | 515 | 515 |
| GPR4      | 0.089229 | 0.042966 | 0.086773 | 515 | 515 |
| MAPKAPK2  | 0.089229 | 0.042965 | 0.086773 | 515 | 515 |
| IGLL3     | 0.089316 | 0.042762 | 0.08644  | 515 | 281 |
| DBP       | 0.089336 | 0.042715 | 0.086354 | 515 | 515 |
| RNASET2   | 0.089341 | 0.042703 | 0.086348 | 515 | 515 |
| DLEU2     | 0.089349 | 0.042685 | 0.08632  | 515 | 515 |
| MAGEE2    | 0.089363 | 0.042652 | 0.086271 | 515 | 432 |
| CBLB      | 0.089491 | 0.042356 | 0.085733 | 515 | 515 |
| BUB1      | 0.089491 | 0.042355 | 0.085733 | 515 | 515 |
| WBP5      | 0.089493 | 0.042351 | 0.085733 | 515 | 515 |
| OR4D1     | 0.089497 | 0.042341 | 0.08573  | 515 | 18  |
| NUDT10    | 0.089499 | 0.042337 | 0.08573  | 515 | 494 |
| B3GALT2   | 0.089514 | 0.042302 | 0.085674 | 515 | 515 |

|           |          |          |          |     |     |
|-----------|----------|----------|----------|-----|-----|
| ATG9B     | 0.089567 | 0.042178 | 0.085443 | 515 | 515 |
| BAMBI     | 0.08958  | 0.04215  | 0.085401 | 515 | 515 |
| FAM74A4   | 0.08961  | 0.042081 | 0.085305 | 515 | 20  |
| HR        | 0.089622 | 0.042053 | 0.085258 | 515 | 514 |
| SEMA5B    | 0.089653 | 0.041981 | 0.085121 | 515 | 514 |
| ITLN1     | 0.089728 | 0.041809 | 0.084789 | 515 | 457 |
| C10orf46  | 0.089732 | 0.0418   | 0.084778 | 515 | 515 |
| PGGT1B    | 0.089758 | 0.041742 | 0.084686 | 515 | 515 |
| MAP7D2    | 0.089781 | 0.041687 | 0.084585 | 515 | 515 |
| KCTD7     | 0.089809 | 0.041623 | 0.084463 | 515 | 515 |
| NOVA2     | 0.089823 | 0.041592 | 0.084418 | 515 | 514 |
| RNF43     | 0.089824 | 0.04159  | 0.084418 | 515 | 515 |
| G2E3      | 0.089827 | 0.041583 | 0.084416 | 515 | 515 |
| CCDC147   | 0.089829 | 0.041579 | 0.084416 | 515 | 504 |
| WNT3A     | 0.089892 | 0.041435 | 0.084159 | 515 | 481 |
| UTP15     | 0.089914 | 0.041386 | 0.084084 | 515 | 515 |
| ZCCHC12   | 0.089954 | 0.041296 | 0.083909 | 515 | 508 |
| PIK3C3    | 0.089969 | 0.041261 | 0.083848 | 515 | 515 |
| BAZ1A     | 0.089975 | 0.041246 | 0.083835 | 515 | 515 |
| SLC6A16   | 0.090001 | 0.041189 | 0.083745 | 515 | 515 |
| GLB1L3    | 0.090031 | 0.04112  | 0.083621 | 515 | 453 |
| GNPDA2    | 0.090048 | 0.041082 | 0.083561 | 515 | 515 |
| C3orf58   | 0.090049 | 0.04108  | 0.083561 | 515 | 515 |
| ATP6AP2   | 0.090104 | 0.040955 | 0.083345 | 515 | 515 |
| CXorf40B  | 0.090197 | 0.040746 | 0.082945 | 515 | 515 |
| DCTN5     | 0.090203 | 0.040733 | 0.082927 | 515 | 515 |
| CEP78     | 0.090249 | 0.040631 | 0.082744 | 515 | 515 |
| OR7D2     | 0.090267 | 0.040591 | 0.08268  | 515 | 353 |
| ANKRD32   | 0.090267 | 0.040591 | 0.08268  | 515 | 515 |
| PARK2     | 0.090267 | 0.040589 | 0.08268  | 515 | 515 |
| BEX5      | 0.090297 | 0.040525 | 0.082569 | 515 | 515 |
| ZNF841    | 0.090297 | 0.040524 | 0.082569 | 515 | 515 |
| ACOXL     | 0.090298 | 0.040521 | 0.082569 | 515 | 511 |
| PRKRIR    | 0.090305 | 0.040506 | 0.082558 | 515 | 515 |
| SLC36A3   | 0.090347 | 0.040413 | 0.082383 | 515 | 112 |
| DKFZP434H | 0.090385 | 0.040328 | 0.082236 | 515 | 26  |
| RPH3A     | 0.090398 | 0.0403   | 0.082195 | 515 | 453 |
| SPTLC1    | 0.090451 | 0.040182 | 0.081979 | 515 | 515 |
| FAM160B1  | 0.090492 | 0.040091 | 0.081835 | 515 | 515 |
| KRTAP4-11 | 0.090504 | 0.040064 | 0.081788 | 515 | 25  |
| NTNG2     | 0.090573 | 0.039912 | 0.081504 | 515 | 513 |
| MGC16121  | 0.090579 | 0.039898 | 0.081484 | 515 | 508 |
| DPEP3     | 0.090599 | 0.039855 | 0.08144  | 515 | 384 |
| ZNF689    | 0.090619 | 0.039811 | 0.081373 | 515 | 515 |
| ASNSD1    | 0.090624 | 0.0398   | 0.081358 | 515 | 515 |
| FRY       | 0.090633 | 0.03978  | 0.081326 | 515 | 515 |
| DNHD1     | 0.090637 | 0.039772 | 0.081318 | 515 | 515 |
| DRAP1     | 0.090658 | 0.039726 | 0.08124  | 515 | 515 |
| IPO11     | 0.090663 | 0.039715 | 0.081225 | 515 | 515 |
| TRIB1     | 0.090739 | 0.039547 | 0.080924 | 515 | 515 |
| C9        | 0.090775 | 0.03947  | 0.080808 | 515 | 258 |
| FLJ10038  | 0.090817 | 0.039378 | 0.080643 | 515 | 515 |
| MYH16     | 0.090818 | 0.039377 | 0.080643 | 515 | 379 |
| ULBP1     | 0.09082  | 0.039371 | 0.080643 | 515 | 515 |

|           |          |          |          |     |     |
|-----------|----------|----------|----------|-----|-----|
| CDKN2AIP  | 0.090868 | 0.039266 | 0.080464 | 515 | 515 |
| BLVRA     | 0.090873 | 0.039255 | 0.08045  | 515 | 515 |
| ASPH      | 0.090899 | 0.0392   | 0.080362 | 515 | 515 |
| SDR16C5   | 0.090908 | 0.039181 | 0.080341 | 515 | 515 |
| SAMD14    | 0.090912 | 0.039172 | 0.080338 | 515 | 514 |
| RTN4      | 0.090925 | 0.039144 | 0.080297 | 515 | 515 |
| MGC16384  | 0.090932 | 0.039128 | 0.080273 | 515 | 498 |
| PPP1R15A  | 0.090965 | 0.039056 | 0.080154 | 515 | 515 |
| ASCL3     | 0.090976 | 0.039033 | 0.080119 | 515 | 179 |
| INSIG1    | 0.090976 | 0.039033 | 0.080119 | 515 | 515 |
| BMI1      | 0.090998 | 0.038985 | 0.080041 | 515 | 515 |
| ACSM1     | 0.091019 | 0.03894  | 0.079959 | 515 | 505 |
| ZNF345    | 0.091108 | 0.038748 | 0.079599 | 515 | 515 |
| ATP1A2    | 0.091111 | 0.038742 | 0.079595 | 515 | 506 |
| FKSG29    | 0.091118 | 0.038728 | 0.079574 | 515 | 182 |
| C6orf170  | 0.091118 | 0.038728 | 0.079574 | 515 | 515 |
| PHLPP2    | 0.091148 | 0.038662 | 0.079463 | 515 | 515 |
| CCNE2     | 0.091174 | 0.038606 | 0.079389 | 515 | 515 |
| CDKN3     | 0.091181 | 0.038592 | 0.079367 | 515 | 515 |
| ZRANB2    | 0.091208 | 0.038534 | 0.079272 | 515 | 515 |
| CKMT2     | 0.091223 | 0.038503 | 0.079226 | 515 | 508 |
| TSNAXIP1  | 0.091267 | 0.038407 | 0.079054 | 515 | 511 |
| FOXI1     | 0.091268 | 0.038407 | 0.079054 | 515 | 307 |
| PCSK5     | 0.091335 | 0.038264 | 0.078791 | 515 | 515 |
| LOC100133 | 0.091353 | 0.038227 | 0.07873  | 515 | 493 |
| GDF3      | 0.091365 | 0.038199 | 0.078682 | 515 | 351 |
| ACTN3     | 0.091394 | 0.038139 | 0.078589 | 515 | 400 |
| GEM       | 0.091488 | 0.03794  | 0.07822  | 515 | 515 |
| BBS9      | 0.09151  | 0.037893 | 0.07814  | 515 | 515 |
| CELA1     | 0.091556 | 0.037797 | 0.077957 | 515 | 155 |
| CSNK1G3   | 0.091571 | 0.037765 | 0.077908 | 515 | 515 |
| IRX6      | 0.091595 | 0.037715 | 0.077844 | 515 | 496 |
| GLUD2     | 0.091599 | 0.037705 | 0.077833 | 515 | 515 |
| CPM       | 0.091611 | 0.037682 | 0.077792 | 515 | 515 |
| C1orf83   | 0.091777 | 0.037334 | 0.077185 | 515 | 515 |
| TRAPPC2P1 | 0.091848 | 0.037188 | 0.076915 | 515 | 515 |
| TUBA8     | 0.091866 | 0.037151 | 0.076846 | 515 | 515 |
| CSRNP1    | 0.091872 | 0.037138 | 0.076828 | 515 | 515 |
| POM121L8F | 0.091907 | 0.037065 | 0.076724 | 515 | 477 |
| LRRC4B    | 0.091931 | 0.037015 | 0.076646 | 515 | 514 |
| WNT5A     | 0.091953 | 0.03697  | 0.076566 | 515 | 515 |
| PDP1      | 0.092051 | 0.036768 | 0.076182 | 515 | 515 |
| CST4      | 0.092151 | 0.036563 | 0.075787 | 515 | 444 |
| ZNF200    | 0.092185 | 0.036495 | 0.075662 | 515 | 515 |
| HBG1      | 0.092295 | 0.036271 | 0.075229 | 515 | 301 |
| PCP4      | 0.092297 | 0.036267 | 0.075228 | 515 | 487 |
| PRPF38B   | 0.092329 | 0.036201 | 0.075107 | 515 | 515 |
| NUS1      | 0.092366 | 0.036127 | 0.074969 | 515 | 515 |
| MPP4      | 0.092395 | 0.036068 | 0.074855 | 515 | 413 |
| LOC642597 | 0.092432 | 0.035992 | 0.074721 | 515 | 180 |
| ZNF773    | 0.092513 | 0.035829 | 0.074405 | 515 | 515 |
| HOXB3     | 0.092514 | 0.035827 | 0.074405 | 515 | 515 |
| SRR       | 0.092585 | 0.035685 | 0.07413  | 515 | 515 |
| RPS12     | 0.092597 | 0.03566  | 0.074086 | 515 | 515 |

|           |          |          |          |     |     |
|-----------|----------|----------|----------|-----|-----|
| RGS17     | 0.092638 | 0.035579 | 0.073955 | 515 | 510 |
| ALG2      | 0.092653 | 0.035549 | 0.0739   | 515 | 515 |
| HIPK3     | 0.092658 | 0.03554  | 0.073889 | 515 | 515 |
| CDK4      | 0.092704 | 0.035448 | 0.073713 | 515 | 515 |
| RARS2     | 0.09275  | 0.035355 | 0.073536 | 515 | 515 |
| SDC2      | 0.092754 | 0.035347 | 0.073527 | 515 | 515 |
| SHOX2     | 0.092763 | 0.035331 | 0.073501 | 515 | 503 |
| KCTD16    | 0.09287  | 0.035119 | 0.073095 | 515 | 512 |
| HIPK1     | 0.092877 | 0.035105 | 0.073076 | 515 | 515 |
| VCL       | 0.092885 | 0.035088 | 0.073049 | 515 | 515 |
| IKZF2     | 0.092886 | 0.035087 | 0.073049 | 515 | 515 |
| LTBP4     | 0.092909 | 0.035041 | 0.07298  | 515 | 515 |
| EFNB2     | 0.092934 | 0.034992 | 0.072886 | 515 | 515 |
| IL2ORB    | 0.09296  | 0.034941 | 0.072796 | 515 | 515 |
| CCNA2     | 0.092987 | 0.034888 | 0.072693 | 515 | 515 |
| FAM71B    | 0.093022 | 0.034819 | 0.072574 | 515 | 14  |
| STYK1     | 0.093034 | 0.034795 | 0.072538 | 515 | 515 |
| SLC36A2   | 0.093057 | 0.03475  | 0.072451 | 515 | 95  |
| ITGA3     | 0.093058 | 0.03475  | 0.072451 | 515 | 515 |
| ZSCAN5A   | 0.09307  | 0.034726 | 0.072423 | 515 | 515 |
| GPR161    | 0.093071 | 0.034724 | 0.072423 | 515 | 515 |
| YIPF1     | 0.093071 | 0.034722 | 0.072423 | 515 | 515 |
| C4orf46   | 0.093081 | 0.034704 | 0.072399 | 515 | 515 |
| GRAMD1C   | 0.093128 | 0.034611 | 0.072229 | 515 | 515 |
| ANKH      | 0.093168 | 0.034535 | 0.072077 | 515 | 515 |
| SLC2A12   | 0.09318  | 0.03451  | 0.072032 | 515 | 515 |
| SORCS1    | 0.093212 | 0.034448 | 0.071918 | 515 | 404 |
| DNAH6     | 0.093218 | 0.034437 | 0.071903 | 515 | 508 |
| LOC148145 | 0.093241 | 0.034392 | 0.071823 | 515 | 134 |
| B4GALT6   | 0.093246 | 0.034382 | 0.07181  | 515 | 515 |
| LOH3CR2A  | 0.093269 | 0.034339 | 0.071727 | 515 | 515 |
| HABP2     | 0.093272 | 0.034332 | 0.071722 | 515 | 509 |
| NKX3-1    | 0.093276 | 0.034325 | 0.071714 | 515 | 515 |
| LMBRD1    | 0.093404 | 0.034076 | 0.071246 | 515 | 515 |
| MTMR9     | 0.093433 | 0.034022 | 0.071148 | 515 | 515 |
| XDH       | 0.093438 | 0.034012 | 0.071134 | 515 | 515 |
| GGTLC1    | 0.093457 | 0.033976 | 0.071081 | 515 | 513 |
| MTERF     | 0.09347  | 0.03395  | 0.071035 | 515 | 515 |
| CKAP2L    | 0.093477 | 0.033936 | 0.07102  | 515 | 515 |
| THSD7B    | 0.09348  | 0.033931 | 0.071017 | 515 | 506 |
| CCRN4L    | 0.093481 | 0.03393  | 0.071017 | 515 | 515 |
| IL8       | 0.093491 | 0.03391  | 0.070988 | 515 | 515 |
| UBP1      | 0.093539 | 0.033817 | 0.07082  | 515 | 515 |
| FAM20C    | 0.093541 | 0.033814 | 0.07082  | 515 | 515 |
| DDX24     | 0.093611 | 0.033681 | 0.070567 | 515 | 515 |
| NPPA      | 0.093636 | 0.033632 | 0.070473 | 515 | 436 |
| FAM111B   | 0.093676 | 0.033557 | 0.070353 | 515 | 515 |
| MACF1     | 0.093759 | 0.0334   | 0.070067 | 515 | 515 |
| GPRIN1    | 0.093765 | 0.033388 | 0.070049 | 515 | 515 |
| C20orf141 | 0.093806 | 0.03331  | 0.069916 | 515 | 180 |
| COL5A3    | 0.093828 | 0.033269 | 0.069836 | 515 | 515 |
| SYN1      | 0.093893 | 0.033147 | 0.069595 | 515 | 515 |
| FBP2      | 0.093902 | 0.03313  | 0.069574 | 515 | 302 |
| NBPF15    | 0.093946 | 0.033048 | 0.069408 | 515 | 515 |



|           |          |          |          |     |     |
|-----------|----------|----------|----------|-----|-----|
| PRRT2     | 0.093987 | 0.03297  | 0.069266 | 515 | 515 |
| S100PBP   | 0.093997 | 0.032952 | 0.069244 | 515 | 515 |
| FAM138B   | 0.094001 | 0.032944 | 0.069234 | 515 | 98  |
| LOC285593 | 0.094106 | 0.032748 | 0.06888  | 515 | 485 |
| GFAP      | 0.094224 | 0.032529 | 0.06846  | 515 | 493 |
| PNP       | 0.094273 | 0.032439 | 0.068301 | 515 | 515 |
| SHOC2     | 0.094306 | 0.032378 | 0.068201 | 515 | 515 |
| C10orf53  | 0.094313 | 0.032364 | 0.068181 | 515 | 96  |
| LOC651250 | 0.094318 | 0.032355 | 0.068175 | 515 | 515 |
| ZNF808    | 0.094367 | 0.032266 | 0.068022 | 515 | 515 |
| SPSB1     | 0.094395 | 0.032214 | 0.067928 | 515 | 515 |
| GALNTL2   | 0.094409 | 0.032189 | 0.067883 | 515 | 514 |
| INSRR     | 0.094421 | 0.032167 | 0.067844 | 515 | 335 |
| RIPK1     | 0.094491 | 0.032039 | 0.067608 | 515 | 515 |
| KCTD19    | 0.094546 | 0.031937 | 0.067409 | 515 | 462 |
| TDP1      | 0.094555 | 0.031923 | 0.067385 | 515 | 515 |
| TNFSF11   | 0.094598 | 0.031844 | 0.067255 | 515 | 511 |
| C1orf194  | 0.094624 | 0.031796 | 0.067168 | 515 | 456 |
| GLMN      | 0.094646 | 0.031757 | 0.067099 | 515 | 515 |
| TRO       | 0.094647 | 0.031754 | 0.067099 | 515 | 515 |
| PSMA1     | 0.09465  | 0.031749 | 0.067099 | 515 | 515 |
| GK3P      | 0.094663 | 0.031726 | 0.067077 | 515 | 515 |
| PAQR5     | 0.094665 | 0.031721 | 0.067073 | 515 | 515 |
| WAPAL     | 0.094691 | 0.031674 | 0.066995 | 515 | 515 |
| TRPM8     | 0.094696 | 0.031666 | 0.066985 | 515 | 499 |
| CDKL4     | 0.094705 | 0.031649 | 0.066956 | 515 | 281 |
| CRB1      | 0.09474  | 0.031587 | 0.066832 | 515 | 437 |
| ALOX15B   | 0.094761 | 0.031549 | 0.066765 | 515 | 515 |
| OR2L3     | 0.094786 | 0.031504 | 0.066684 | 515 | 11  |
| MTRF1L    | 0.094793 | 0.031491 | 0.066665 | 515 | 515 |
| RCN1      | 0.094853 | 0.031382 | 0.066462 | 515 | 515 |
| COL21A1   | 0.094915 | 0.031271 | 0.066255 | 515 | 515 |
| PRPH2     | 0.094918 | 0.031267 | 0.066253 | 515 | 515 |
| SLC5A3    | 0.094999 | 0.031122 | 0.065994 | 515 | 515 |
| FBXO4     | 0.095028 | 0.03107  | 0.065915 | 515 | 515 |
| CDS2      | 0.095063 | 0.031009 | 0.065818 | 515 | 515 |
| DUSP19    | 0.095079 | 0.03098  | 0.065771 | 515 | 515 |
| BLMH      | 0.095088 | 0.030964 | 0.065751 | 515 | 515 |
| C1QTNF4   | 0.095115 | 0.030915 | 0.065661 | 515 | 462 |
| LOC441454 | 0.095122 | 0.030903 | 0.065642 | 515 | 502 |
| CLCA2     | 0.095135 | 0.030881 | 0.065609 | 515 | 490 |
| PPAPDC1A  | 0.095144 | 0.030865 | 0.065582 | 515 | 501 |
| HBM       | 0.095154 | 0.030848 | 0.065552 | 515 | 79  |
| ADHFE1    | 0.095185 | 0.030793 | 0.065442 | 515 | 515 |
| COMMD10   | 0.095187 | 0.030789 | 0.065442 | 515 | 515 |
| HYALP1    | 0.095189 | 0.030784 | 0.065442 | 515 | 9   |
| DPRXP4    | 0.095204 | 0.030759 | 0.065412 | 515 | 492 |
| SPEF2     | 0.095258 | 0.030664 | 0.065253 | 515 | 515 |
| IL5       | 0.095271 | 0.030641 | 0.06521  | 515 | 132 |
| MS4A15    | 0.095271 | 0.03064  | 0.06521  | 515 | 498 |
| PDCD4     | 0.095272 | 0.030639 | 0.06521  | 515 | 515 |
| AMAC1     | 0.095273 | 0.030636 | 0.06521  | 515 | 85  |
| ADK       | 0.095295 | 0.030599 | 0.065182 | 515 | 515 |
| PHLDB1    | 0.095317 | 0.03056  | 0.065107 | 515 | 515 |

|           |          |          |          |     |     |
|-----------|----------|----------|----------|-----|-----|
| RCL1      | 0.095347 | 0.030507 | 0.065002 | 515 | 515 |
| C2orf86   | 0.095364 | 0.030477 | 0.064959 | 515 | 515 |
| PODNL1    | 0.095421 | 0.030379 | 0.064762 | 515 | 515 |
| DIMT1L    | 0.095442 | 0.030342 | 0.064704 | 515 | 515 |
| UBE2U     | 0.095513 | 0.030218 | 0.064453 | 515 | 108 |
| HAGHL     | 0.095523 | 0.0302   | 0.064423 | 515 | 515 |
| ULK4      | 0.095545 | 0.030163 | 0.064356 | 515 | 515 |
| LYPD1     | 0.095578 | 0.030104 | 0.064238 | 515 | 515 |
| FAM54A    | 0.09558  | 0.030102 | 0.064238 | 515 | 515 |
| C1orf146  | 0.095592 | 0.03008  | 0.064201 | 515 | 25  |
| PCDHGA9   | 0.095613 | 0.030044 | 0.064131 | 515 | 514 |
| HBA1      | 0.095626 | 0.030022 | 0.064091 | 515 | 487 |
| RNF168    | 0.095657 | 0.029968 | 0.063989 | 515 | 515 |
| BTBD10    | 0.095686 | 0.029919 | 0.063904 | 515 | 515 |
| CLDN5     | 0.095694 | 0.029904 | 0.06388  | 515 | 515 |
| C14orf48  | 0.095707 | 0.029882 | 0.063839 | 515 | 67  |
| DBF4      | 0.095709 | 0.02988  | 0.063839 | 515 | 515 |
| CACNA2D3  | 0.095746 | 0.029815 | 0.063723 | 515 | 511 |
| ANKRD24   | 0.095768 | 0.029777 | 0.063655 | 515 | 514 |
| RAD51AP1  | 0.0958   | 0.029722 | 0.063553 | 515 | 515 |
| MTMR1     | 0.095836 | 0.02966  | 0.06344  | 515 | 515 |
| SYNM      | 0.095837 | 0.029659 | 0.06344  | 515 | 515 |
| C3orf20   | 0.095855 | 0.029629 | 0.063393 | 515 | 222 |
| NR2F1     | 0.095941 | 0.029481 | 0.063118 | 515 | 515 |
| ZFP2      | 0.095961 | 0.029447 | 0.063059 | 515 | 515 |
| NIPAL2    | 0.095968 | 0.029436 | 0.063041 | 515 | 515 |
| ERGIC2    | 0.095979 | 0.029417 | 0.063015 | 515 | 515 |
| LSM10     | 0.095983 | 0.02941  | 0.063006 | 515 | 515 |
| PANX1     | 0.095993 | 0.029393 | 0.062976 | 515 | 515 |
| NEU2      | 0.096019 | 0.029349 | 0.062895 | 515 | 31  |
| SNORD22   | 0.096116 | 0.029186 | 0.062586 | 515 | 164 |
| MYOZ1     | 0.096149 | 0.02913  | 0.06248  | 515 | 512 |
| ITM2C     | 0.096176 | 0.029085 | 0.062391 | 515 | 515 |
| ZNF860    | 0.096186 | 0.029068 | 0.06236  | 515 | 515 |
| UNC13A    | 0.096207 | 0.029032 | 0.06229  | 515 | 511 |
| C6orf142  | 0.096233 | 0.02899  | 0.062206 | 515 | 287 |
| ROCK1     | 0.096234 | 0.028988 | 0.062206 | 515 | 515 |
| SLC6A1    | 0.09624  | 0.028978 | 0.062194 | 515 | 515 |
| KCTD20    | 0.096261 | 0.028943 | 0.062125 | 515 | 515 |
| LOC100302 | 0.096276 | 0.028917 | 0.062083 | 515 | 429 |
| TBX4      | 0.09631  | 0.02886  | 0.061975 | 515 | 515 |
| FAM71A    | 0.096312 | 0.028857 | 0.061974 | 515 | 167 |
| IL28B     | 0.096323 | 0.028839 | 0.061942 | 515 | 93  |
| PDZRN4    | 0.096326 | 0.028833 | 0.061937 | 515 | 489 |
| PIGK      | 0.09633  | 0.028827 | 0.06193  | 515 | 515 |
| RNF217    | 0.096388 | 0.02873  | 0.061768 | 515 | 515 |
| KCNIP2    | 0.096439 | 0.028645 | 0.061611 | 515 | 515 |
| NOX1      | 0.096442 | 0.028641 | 0.061611 | 515 | 489 |
| PFDN1     | 0.096444 | 0.028637 | 0.061611 | 515 | 515 |
| TCEAL8    | 0.096458 | 0.028613 | 0.06157  | 515 | 515 |
| ARRDC2    | 0.096462 | 0.028606 | 0.061562 | 515 | 515 |
| GADL1     | 0.096518 | 0.028514 | 0.061389 | 515 | 306 |
| MAP3K13   | 0.096519 | 0.028513 | 0.061389 | 515 | 515 |
| S100A12   | 0.096551 | 0.02846  | 0.061294 | 515 | 491 |

|           |          |          |          |     |     |
|-----------|----------|----------|----------|-----|-----|
| ANTXRL    | 0.096552 | 0.028459 | 0.061294 | 515 | 154 |
| SOST      | 0.096627 | 0.028335 | 0.061043 | 515 | 377 |
| DKFZp761E | 0.096668 | 0.028267 | 0.060923 | 515 | 515 |
| C10orf79  | 0.096692 | 0.028228 | 0.060877 | 515 | 514 |
| STXBP3    | 0.096715 | 0.02819  | 0.060804 | 515 | 515 |
| CFTR      | 0.096719 | 0.028184 | 0.060797 | 515 | 510 |
| HSPB3     | 0.096738 | 0.028152 | 0.060735 | 515 | 450 |
| RSPH10B2  | 0.096769 | 0.028102 | 0.060638 | 515 | 492 |
| INVS      | 0.096791 | 0.028066 | 0.060576 | 515 | 515 |
| GIPC3     | 0.096874 | 0.027931 | 0.060315 | 515 | 515 |
| GDPD4     | 0.096876 | 0.027928 | 0.060315 | 515 | 395 |
| DCHS1     | 0.096914 | 0.027866 | 0.060195 | 515 | 515 |
| EDEM1     | 0.096933 | 0.027836 | 0.060149 | 515 | 515 |
| FAM81B    | 0.096946 | 0.027814 | 0.060108 | 515 | 502 |
| TGM7      | 0.096949 | 0.02781  | 0.060108 | 515 | 118 |
| FLJ45983  | 0.09695  | 0.027808 | 0.060108 | 515 | 320 |
| RPL23AP82 | 0.096974 | 0.02777  | 0.060052 | 515 | 515 |
| WFDC6     | 0.096985 | 0.027751 | 0.060018 | 515 | 219 |
| ANKRD34C  | 0.097042 | 0.02766  | 0.059835 | 515 | 179 |
| HSD17B6   | 0.097042 | 0.02766  | 0.059835 | 515 | 515 |
| EID1      | 0.097093 | 0.027578 | 0.059689 | 515 | 515 |
| PFDN5     | 0.097094 | 0.027576 | 0.059689 | 515 | 515 |
| PANK3     | 0.097109 | 0.027552 | 0.059652 | 515 | 515 |
| ATP10B    | 0.097132 | 0.027515 | 0.059592 | 515 | 515 |
| MKL1      | 0.097174 | 0.027447 | 0.059451 | 515 | 515 |
| PRPH      | 0.09718  | 0.027437 | 0.059436 | 515 | 428 |
| ZNF709    | 0.097188 | 0.027425 | 0.059416 | 515 | 515 |
| C2orf39   | 0.097206 | 0.027396 | 0.059359 | 515 | 488 |
| RNF165    | 0.097249 | 0.027328 | 0.059231 | 515 | 501 |
| ESPNL     | 0.097252 | 0.027324 | 0.059228 | 515 | 513 |
| LOC389333 | 0.097263 | 0.027305 | 0.059195 | 515 | 515 |
| DYNC1LI1  | 0.097273 | 0.02729  | 0.059169 | 515 | 515 |
| GPBP1     | 0.097277 | 0.027283 | 0.05916  | 515 | 515 |
| S100A2    | 0.09729  | 0.027262 | 0.059121 | 515 | 515 |
| BMPER     | 0.097331 | 0.027198 | 0.058994 | 515 | 509 |
| AAK1      | 0.097343 | 0.027179 | 0.058959 | 515 | 515 |
| PTPN12    | 0.097415 | 0.027064 | 0.058735 | 515 | 515 |
| ASXL3     | 0.097452 | 0.027007 | 0.058624 | 515 | 502 |
| PELI1     | 0.097466 | 0.026984 | 0.05859  | 515 | 515 |
| SUFU      | 0.097492 | 0.026942 | 0.058516 | 515 | 515 |
| C6orf167  | 0.097513 | 0.026911 | 0.05846  | 515 | 515 |
| DNAJC22   | 0.097513 | 0.026909 | 0.05846  | 515 | 514 |
| JDP2      | 0.097524 | 0.026893 | 0.058434 | 515 | 515 |
| NMNAT1    | 0.097549 | 0.026854 | 0.058362 | 515 | 515 |
| NOTCH1    | 0.097555 | 0.026844 | 0.058347 | 515 | 515 |
| NUP43     | 0.097568 | 0.026824 | 0.058316 | 515 | 515 |
| MMP23B    | 0.097583 | 0.026801 | 0.058271 | 515 | 515 |
| ALOX12    | 0.097627 | 0.026732 | 0.058135 | 515 | 506 |
| DSCAML1   | 0.097627 | 0.026731 | 0.058135 | 515 | 499 |
| CCDC85A   | 0.097645 | 0.026703 | 0.058091 | 515 | 515 |
| SEC22A    | 0.097686 | 0.026639 | 0.05797  | 515 | 515 |
| HCCS      | 0.097701 | 0.026615 | 0.057931 | 515 | 515 |
| AGMAT     | 0.097702 | 0.026614 | 0.057931 | 515 | 515 |
| AOC2      | 0.097754 | 0.026533 | 0.057766 | 515 | 515 |

|           |          |          |          |     |     |
|-----------|----------|----------|----------|-----|-----|
| ASNA1     | 0.097782 | 0.026491 | 0.057685 | 515 | 515 |
| NUDT11    | 0.097808 | 0.026449 | 0.057601 | 515 | 515 |
| SLC25A34  | 0.097872 | 0.026351 | 0.057397 | 515 | 515 |
| NRBP1     | 0.097887 | 0.026327 | 0.057355 | 515 | 515 |
| CXCL16    | 0.097902 | 0.026304 | 0.05731  | 515 | 515 |
| FHOD1     | 0.097903 | 0.026303 | 0.05731  | 515 | 515 |
| CDH13     | 0.097934 | 0.026256 | 0.057224 | 515 | 515 |
| AKAP6     | 0.097947 | 0.026235 | 0.057186 | 515 | 515 |
| BMP15     | 0.097976 | 0.02619  | 0.057099 | 515 | 102 |
| TMEM8C    | 0.098001 | 0.026152 | 0.057023 | 515 | 124 |
| KCNK17    | 0.098031 | 0.026105 | 0.056933 | 515 | 510 |
| ZFP30     | 0.098041 | 0.02609  | 0.056906 | 515 | 515 |
| SC02      | 0.098044 | 0.026085 | 0.056906 | 515 | 515 |
| PAPSS1    | 0.098069 | 0.026048 | 0.056847 | 515 | 515 |
| PSD       | 0.098077 | 0.026036 | 0.056832 | 515 | 515 |
| ZNF214    | 0.098106 | 0.02599  | 0.056751 | 515 | 514 |
| DUSP6     | 0.098219 | 0.025819 | 0.05642  | 515 | 515 |
| LCA5      | 0.098263 | 0.025752 | 0.056329 | 515 | 515 |
| RRAGA     | 0.098275 | 0.025735 | 0.056311 | 515 | 515 |
| CXorf22   | 0.098292 | 0.025709 | 0.056264 | 515 | 367 |
| ALOX15    | 0.098307 | 0.025686 | 0.056227 | 515 | 503 |
| MGAT5     | 0.098409 | 0.025533 | 0.055941 | 515 | 515 |
| ACCN4     | 0.098421 | 0.025514 | 0.055907 | 515 | 458 |
| LOC388955 | 0.098433 | 0.025496 | 0.055877 | 515 | 515 |
| IFITM4P   | 0.098436 | 0.025492 | 0.055876 | 515 | 216 |
| GLUD1     | 0.098442 | 0.025483 | 0.055863 | 515 | 515 |
| CHMP7     | 0.098444 | 0.025479 | 0.05586  | 515 | 515 |
| TSPAN5    | 0.098445 | 0.025478 | 0.05586  | 515 | 515 |
| LOC134466 | 0.098541 | 0.025335 | 0.055586 | 515 | 510 |
| UBE2F     | 0.098542 | 0.025333 | 0.055586 | 515 | 515 |
| DUSP15    | 0.098657 | 0.025162 | 0.055263 | 515 | 503 |
| GAA       | 0.098666 | 0.025149 | 0.055241 | 515 | 515 |
| VSIG10L   | 0.0987   | 0.025099 | 0.055157 | 515 | 515 |
| KCNJ8     | 0.098744 | 0.025033 | 0.05504  | 515 | 515 |
| LOC100128 | 0.098777 | 0.024984 | 0.054938 | 515 | 484 |
| NAPSA     | 0.098778 | 0.024983 | 0.054938 | 515 | 515 |
| PRR11     | 0.098816 | 0.024927 | 0.054848 | 515 | 513 |
| GSTA3     | 0.098825 | 0.024913 | 0.054824 | 515 | 302 |
| FAM82A2   | 0.098833 | 0.024902 | 0.054811 | 515 | 515 |
| NR1I2     | 0.098862 | 0.02486  | 0.054736 | 515 | 491 |
| CTNNB1    | 0.098942 | 0.024743 | 0.054502 | 515 | 515 |
| CCDC42B   | 0.098943 | 0.024741 | 0.054502 | 515 | 508 |
| AMH       | 0.098951 | 0.024728 | 0.054483 | 515 | 460 |
| TRDMT1    | 0.098961 | 0.024714 | 0.054463 | 515 | 515 |
| CPN2      | 0.099063 | 0.024565 | 0.054165 | 515 | 417 |
| IFNGR2    | 0.099118 | 0.024485 | 0.054001 | 515 | 515 |
| MTMR10    | 0.099123 | 0.024478 | 0.05399  | 515 | 515 |
| LIMS3     | 0.09915  | 0.02444  | 0.053919 | 515 | 482 |
| TRNT1     | 0.099155 | 0.024433 | 0.053909 | 515 | 515 |
| CNIH      | 0.09918  | 0.024396 | 0.05384  | 515 | 515 |
| TMEM159   | 0.0992   | 0.024367 | 0.053782 | 515 | 515 |
| ZDHHC20   | 0.099206 | 0.024358 | 0.053768 | 515 | 515 |
| RPA4      | 0.099211 | 0.024351 | 0.053765 | 515 | 426 |
| C6orf122  | 0.099226 | 0.024329 | 0.053723 | 515 | 513 |

|           |          |          |          |     |     |
|-----------|----------|----------|----------|-----|-----|
| HTR4      | 0.099247 | 0.0243   | 0.053669 | 515 | 338 |
| CRYL1     | 0.09932  | 0.024195 | 0.053461 | 515 | 515 |
| DOK6      | 0.099322 | 0.024191 | 0.053459 | 515 | 515 |
| ZFP28     | 0.099325 | 0.024188 | 0.053457 | 515 | 515 |
| SLC35F3   | 0.099368 | 0.024126 | 0.053344 | 515 | 506 |
| C19orf51  | 0.09947  | 0.02398  | 0.053057 | 515 | 515 |
| RHOC      | 0.099473 | 0.023976 | 0.053054 | 515 | 515 |
| KLHL18    | 0.099504 | 0.023932 | 0.052968 | 515 | 515 |
| C13orf26  | 0.099506 | 0.023928 | 0.052965 | 515 | 306 |
| TEX14     | 0.099533 | 0.023891 | 0.052894 | 515 | 515 |
| P4HA2     | 0.099539 | 0.023882 | 0.052881 | 515 | 515 |
| PCDHB12   | 0.0996   | 0.023796 | 0.052707 | 515 | 515 |
| NAB1      | 0.099617 | 0.023771 | 0.052659 | 515 | 515 |
| ZNF665    | 0.099635 | 0.023746 | 0.052621 | 515 | 515 |
| ZNF311    | 0.099642 | 0.023736 | 0.052605 | 515 | 515 |
| C9orf66   | 0.099683 | 0.023679 | 0.052512 | 515 | 514 |
| ZNF555    | 0.099688 | 0.023672 | 0.052502 | 515 | 515 |
| ITSN2     | 0.099707 | 0.023645 | 0.052466 | 515 | 515 |
| SAA3P     | 0.09971  | 0.02364  | 0.052461 | 515 | 26  |
| SDHD      | 0.099748 | 0.023586 | 0.052354 | 515 | 515 |
| TXNDC6    | 0.099763 | 0.023566 | 0.052329 | 515 | 511 |
| FKBP11    | 0.099769 | 0.023558 | 0.052319 | 515 | 515 |
| CENPW     | 0.099785 | 0.023535 | 0.052281 | 515 | 515 |
| SCN4B     | 0.099848 | 0.023448 | 0.052104 | 515 | 515 |
| TMEM126B  | 0.099856 | 0.023436 | 0.052084 | 515 | 515 |
| AMY2B     | 0.099872 | 0.023413 | 0.052038 | 515 | 515 |
| LOC284276 | 0.099873 | 0.023412 | 0.052038 | 515 | 499 |
| TMEM45A   | 0.099901 | 0.023374 | 0.051968 | 515 | 515 |
| ALDH1A1   | 0.099913 | 0.023357 | 0.051936 | 515 | 515 |
| PRSS1     | 0.099946 | 0.023311 | 0.051851 | 515 | 398 |
| EPR1      | 0.099991 | 0.023248 | 0.051735 | 515 | 513 |
| PSMA5     | 0.1      | 0.023236 | 0.051713 | 515 | 515 |
| SHANK1    | 0.100005 | 0.023228 | 0.051702 | 515 | 500 |
| FAM48B2   | 0.100073 | 0.023135 | 0.051511 | 515 | 139 |
| PLBD2     | 0.100074 | 0.023133 | 0.051511 | 515 | 515 |
| NLRP4     | 0.100087 | 0.023115 | 0.05148  | 515 | 266 |
| TRIM29    | 0.100097 | 0.023102 | 0.051456 | 515 | 514 |
| NCCRP1    | 0.100133 | 0.023053 | 0.051357 | 515 | 508 |
| LOC283050 | 0.100133 | 0.023052 | 0.051357 | 515 | 515 |
| ARPM1     | 0.100138 | 0.023046 | 0.051353 | 515 | 515 |
| HTR1D     | 0.100205 | 0.022954 | 0.051165 | 515 | 510 |
| ZDHHC2    | 0.100217 | 0.022936 | 0.051137 | 515 | 515 |
| TMEM63C   | 0.100228 | 0.022921 | 0.05111  | 515 | 514 |
| GALNT3    | 0.100234 | 0.022913 | 0.051098 | 515 | 515 |
| RNF139    | 0.100239 | 0.022906 | 0.051088 | 515 | 515 |
| THAP5     | 0.100281 | 0.02285  | 0.050973 | 515 | 515 |
| ABHD10    | 0.100281 | 0.02285  | 0.050973 | 515 | 515 |
| EGFLAM    | 0.10031  | 0.02281  | 0.050896 | 515 | 515 |
| SFTA1P    | 0.100323 | 0.022791 | 0.050866 | 515 | 513 |
| MFAP2     | 0.100345 | 0.022762 | 0.050813 | 515 | 515 |
| RWDD2A    | 0.10039  | 0.022701 | 0.050697 | 515 | 515 |
| NACC2     | 0.100406 | 0.022679 | 0.05066  | 515 | 515 |
| HIAT1     | 0.100408 | 0.022677 | 0.05066  | 515 | 515 |
| DUSP11    | 0.100439 | 0.022635 | 0.050573 | 515 | 515 |

|           |          |          |          |     |     |
|-----------|----------|----------|----------|-----|-----|
| FLJ40292  | 0.100441 | 0.022631 | 0.050571 | 515 | 444 |
| ILDR2     | 0.100471 | 0.022591 | 0.050502 | 515 | 454 |
| ABTB1     | 0.100475 | 0.022586 | 0.050498 | 515 | 515 |
| RDH8      | 0.100528 | 0.022513 | 0.050353 | 515 | 79  |
| RMRP      | 0.100592 | 0.022428 | 0.050177 | 515 | 515 |
| ASMT      | 0.100599 | 0.022419 | 0.050163 | 515 | 342 |
| ITGB1BP2  | 0.100605 | 0.022411 | 0.050151 | 515 | 506 |
| DNAJC6    | 0.100639 | 0.022365 | 0.050071 | 515 | 515 |
| C1orf192  | 0.100682 | 0.022308 | 0.049959 | 515 | 515 |
| TBXA2R    | 0.100703 | 0.022279 | 0.049905 | 515 | 515 |
| MCTS1     | 0.100724 | 0.022252 | 0.049856 | 515 | 515 |
| PKDCC     | 0.100833 | 0.022106 | 0.049564 | 515 | 515 |
| CARHSP1   | 0.100841 | 0.022096 | 0.049545 | 515 | 515 |
| ISL2      | 0.100852 | 0.022081 | 0.049517 | 515 | 477 |
| CACHD1    | 0.100873 | 0.022053 | 0.049468 | 515 | 515 |
| KRT4      | 0.100975 | 0.021918 | 0.049203 | 515 | 499 |
| MYH11     | 0.100983 | 0.021908 | 0.049191 | 515 | 515 |
| VEZF1     | 0.100993 | 0.021895 | 0.049166 | 515 | 515 |
| C7orf60   | 0.101006 | 0.021877 | 0.049133 | 515 | 515 |
| BUB3      | 0.101023 | 0.021855 | 0.0491   | 515 | 515 |
| MIR17HG   | 0.101086 | 0.021773 | 0.048931 | 515 | 515 |
| CALCOCO1  | 0.101145 | 0.021695 | 0.048774 | 515 | 515 |
| BMP1      | 0.101152 | 0.021686 | 0.048759 | 515 | 515 |
| NUP93     | 0.10116  | 0.021676 | 0.048742 | 515 | 515 |
| DHRS7     | 0.101174 | 0.021657 | 0.04871  | 515 | 515 |
| ALG13     | 0.101269 | 0.021534 | 0.048455 | 515 | 515 |
| ZNF677    | 0.101271 | 0.021532 | 0.048455 | 515 | 515 |
| POM121L1F | 0.10128  | 0.021519 | 0.048443 | 515 | 462 |
| ZBTB20    | 0.101336 | 0.021447 | 0.048298 | 515 | 511 |
| GIPR      | 0.101336 | 0.021447 | 0.048298 | 515 | 513 |
| CCDC135   | 0.101359 | 0.021417 | 0.048254 | 515 | 483 |
| BMPR2     | 0.101372 | 0.021401 | 0.048227 | 515 | 515 |
| CHST8     | 0.101382 | 0.021388 | 0.048203 | 515 | 444 |
| IL9       | 0.101385 | 0.021384 | 0.048198 | 515 | 11  |
| EIF4E1B   | 0.101437 | 0.021317 | 0.048064 | 515 | 162 |
| RAB11FIP2 | 0.101472 | 0.021272 | 0.047979 | 515 | 515 |
| MOV10     | 0.101513 | 0.02122  | 0.047871 | 515 | 515 |
| VPS8      | 0.101556 | 0.021165 | 0.04778  | 515 | 515 |
| CHRNA2    | 0.10158  | 0.021135 | 0.047717 | 515 | 296 |
| CDKN2B    | 0.101618 | 0.021085 | 0.047616 | 515 | 515 |
| GOLT1B    | 0.101638 | 0.02106  | 0.047564 | 515 | 515 |
| LOC100270 | 0.101646 | 0.02105  | 0.047553 | 515 | 514 |
| LYNX1     | 0.101649 | 0.021046 | 0.047548 | 515 | 515 |
| HSPB11    | 0.101655 | 0.021039 | 0.047538 | 515 | 515 |
| ARID5B    | 0.101687 | 0.020997 | 0.04745  | 515 | 515 |
| CEACAM20  | 0.101697 | 0.020985 | 0.047433 | 515 | 145 |
| KDM2B     | 0.101735 | 0.020937 | 0.047335 | 515 | 515 |
| SCARNA5   | 0.101768 | 0.020896 | 0.047263 | 515 | 348 |
| JAG1      | 0.101777 | 0.020884 | 0.047243 | 515 | 515 |
| ZMYND10   | 0.101815 | 0.020837 | 0.047151 | 515 | 515 |
| ST70T1    | 0.10182  | 0.020829 | 0.047139 | 515 | 515 |
| C16orf52  | 0.101852 | 0.020789 | 0.047074 | 515 | 515 |
| MT3       | 0.101938 | 0.020682 | 0.046837 | 515 | 428 |
| FAM76A    | 0.101955 | 0.02066  | 0.046793 | 515 | 515 |

|           |          |          |          |     |     |
|-----------|----------|----------|----------|-----|-----|
| ATF7IP2   | 0.102018 | 0.020582 | 0.046643 | 515 | 515 |
| HS3ST1    | 0.102062 | 0.020526 | 0.046527 | 515 | 515 |
| FLJ33360  | 0.102068 | 0.02052  | 0.046518 | 515 | 431 |
| NT5DC1    | 0.102101 | 0.020479 | 0.046451 | 515 | 515 |
| TSPAN10   | 0.102107 | 0.020471 | 0.046439 | 515 | 515 |
| PRIM1     | 0.102124 | 0.020449 | 0.046395 | 515 | 515 |
| C9orf103  | 0.102147 | 0.020421 | 0.046335 | 515 | 515 |
| NBPF14    | 0.102172 | 0.02039  | 0.046277 | 515 | 515 |
| KLHL28    | 0.102196 | 0.020361 | 0.04622  | 515 | 515 |
| DNASE1L1  | 0.102203 | 0.020352 | 0.046205 | 515 | 515 |
| C18orf54  | 0.102205 | 0.020349 | 0.046204 | 515 | 515 |
| TTL10     | 0.102231 | 0.020317 | 0.046142 | 515 | 494 |
| C12orf75  | 0.102259 | 0.020283 | 0.046081 | 515 | 515 |
| LOC283070 | 0.102313 | 0.020216 | 0.045939 | 515 | 515 |
| DCLK2     | 0.102315 | 0.020214 | 0.045939 | 515 | 515 |
| UTP6      | 0.102359 | 0.02016  | 0.045837 | 515 | 515 |
| RIOK3     | 0.102374 | 0.020141 | 0.045806 | 515 | 515 |
| GPRC5B    | 0.102383 | 0.02013  | 0.045786 | 515 | 515 |
| SYNGR3    | 0.102435 | 0.020067 | 0.045657 | 515 | 515 |
| RRAGB     | 0.102462 | 0.020034 | 0.045599 | 515 | 515 |
| HMOX2     | 0.102502 | 0.019985 | 0.045503 | 515 | 515 |
| HUS1B     | 0.102504 | 0.019983 | 0.045502 | 515 | 456 |
| ZNF207    | 0.102541 | 0.019939 | 0.045417 | 515 | 515 |
| CCDC163P  | 0.102558 | 0.019918 | 0.045375 | 515 | 515 |
| SPDYE4    | 0.102577 | 0.019895 | 0.045337 | 515 | 68  |
| BPIL2     | 0.102626 | 0.019835 | 0.045212 | 515 | 135 |
| ICAM4     | 0.102626 | 0.019835 | 0.045212 | 515 | 515 |
| KCNA10    | 0.102655 | 0.019801 | 0.045165 | 515 | 231 |
| PARP10    | 0.10268  | 0.01977  | 0.045105 | 515 | 515 |
| MRO       | 0.102688 | 0.01976  | 0.045098 | 515 | 511 |
| WDR91     | 0.102693 | 0.019754 | 0.04509  | 515 | 515 |
| KRT32     | 0.102724 | 0.019717 | 0.04501  | 515 | 324 |
| NRBF2     | 0.102779 | 0.019652 | 0.044865 | 515 | 515 |
| CPNE4     | 0.102793 | 0.019635 | 0.044833 | 515 | 504 |
| FCGRT     | 0.102857 | 0.019558 | 0.044687 | 515 | 515 |
| NRIP3     | 0.10286  | 0.019555 | 0.044685 | 515 | 515 |
| NEBL      | 0.102865 | 0.019548 | 0.044675 | 515 | 515 |
| ATP6V1F   | 0.102926 | 0.019476 | 0.044526 | 515 | 515 |
| SNORA20   | 0.103056 | 0.019321 | 0.044207 | 515 | 36  |
| B4GALNT1  | 0.10307  | 0.019305 | 0.044175 | 515 | 515 |
| IRF7      | 0.103082 | 0.019291 | 0.044149 | 515 | 515 |
| UEVLD     | 0.103113 | 0.019255 | 0.044076 | 515 | 515 |
| CGNL1     | 0.103127 | 0.019239 | 0.044043 | 515 | 515 |
| XKR3      | 0.103194 | 0.01916  | 0.043897 | 515 | 241 |
| BRD7P3    | 0.103204 | 0.019148 | 0.043875 | 515 | 327 |
| FAM71F2   | 0.103216 | 0.019134 | 0.043854 | 515 | 498 |
| CYP19A1   | 0.103249 | 0.019095 | 0.04377  | 515 | 505 |
| C17orf91  | 0.103262 | 0.01908  | 0.043746 | 515 | 515 |
| C19orf25  | 0.103272 | 0.019069 | 0.043725 | 515 | 515 |
| ZNF790    | 0.103345 | 0.018983 | 0.043547 | 515 | 515 |
| WDR16     | 0.103368 | 0.018957 | 0.043493 | 515 | 491 |
| LOC100302 | 0.103399 | 0.018921 | 0.04342  | 515 | 513 |
| KLRAQ1    | 0.103405 | 0.018914 | 0.04341  | 515 | 515 |
| SNCAIP    | 0.103422 | 0.018894 | 0.043368 | 515 | 515 |

|           |          |          |          |     |     |
|-----------|----------|----------|----------|-----|-----|
| CCDC60    | 0.103432 | 0.018883 | 0.043347 | 515 | 390 |
| HK2       | 0.103447 | 0.018865 | 0.043313 | 515 | 515 |
| SPATA4    | 0.103545 | 0.018752 | 0.043078 | 515 | 401 |
| RNASEL    | 0.103594 | 0.018695 | 0.042972 | 515 | 515 |
| MGC23284  | 0.103638 | 0.018645 | 0.042866 | 515 | 515 |
| FAM168A   | 0.103656 | 0.018625 | 0.04283  | 515 | 515 |
| CCDC46    | 0.103688 | 0.018588 | 0.042749 | 515 | 515 |
| PRO1768   | 0.103723 | 0.018549 | 0.042669 | 515 | 63  |
| ZNF462    | 0.103754 | 0.018513 | 0.042591 | 515 | 515 |
| OR10V1    | 0.10379  | 0.018472 | 0.042517 | 515 | 46  |
| FBX07     | 0.103806 | 0.018454 | 0.042486 | 515 | 515 |
| VAMP4     | 0.103818 | 0.018441 | 0.04246  | 515 | 515 |
| DPY19L1   | 0.103858 | 0.018395 | 0.04236  | 515 | 515 |
| TXNDC5    | 0.103871 | 0.018381 | 0.042332 | 515 | 515 |
| SPRR2E    | 0.103881 | 0.018369 | 0.042309 | 515 | 158 |
| LOC646214 | 0.103886 | 0.018364 | 0.042302 | 515 | 515 |
| FUT11     | 0.103927 | 0.018317 | 0.042213 | 515 | 515 |
| PDE4A     | 0.103938 | 0.018305 | 0.042196 | 515 | 515 |
| ERN1      | 0.103969 | 0.01827  | 0.042135 | 515 | 515 |
| TMEM194A  | 0.103972 | 0.018267 | 0.042132 | 515 | 515 |
| ADAMTSL3  | 0.103991 | 0.018246 | 0.042098 | 515 | 515 |
| MAP2K1    | 0.104006 | 0.018229 | 0.042069 | 515 | 515 |
| PHF7      | 0.104007 | 0.018228 | 0.042069 | 515 | 515 |
| C9orf123  | 0.104015 | 0.018219 | 0.042061 | 515 | 515 |
| PELO      | 0.104041 | 0.01819  | 0.042003 | 515 | 515 |
| CHRNA7    | 0.104053 | 0.018176 | 0.04198  | 515 | 417 |
| ZNF419    | 0.104085 | 0.018141 | 0.041909 | 515 | 515 |
| SLC23A1   | 0.104105 | 0.018118 | 0.041867 | 515 | 508 |
| FAM89A    | 0.104106 | 0.018117 | 0.041867 | 515 | 515 |
| ACSBG2    | 0.104124 | 0.018097 | 0.041841 | 515 | 393 |
| ZNF718    | 0.10417  | 0.018045 | 0.041735 | 515 | 515 |
| CDC23     | 0.104215 | 0.017996 | 0.041637 | 515 | 515 |
| P2RY4     | 0.104278 | 0.017925 | 0.041488 | 515 | 431 |
| FAM92A1   | 0.104294 | 0.017908 | 0.041457 | 515 | 515 |
| ANKRD35   | 0.104295 | 0.017907 | 0.041457 | 515 | 515 |
| LOC152225 | 0.104361 | 0.017834 | 0.0413   | 515 | 468 |
| AGBL1     | 0.104412 | 0.017778 | 0.041182 | 515 | 293 |
| CA4       | 0.10443  | 0.017758 | 0.041139 | 515 | 473 |
| C21orf67  | 0.104451 | 0.017735 | 0.041091 | 515 | 515 |
| S100A13   | 0.104458 | 0.017727 | 0.041077 | 515 | 515 |
| APCDD1L   | 0.104485 | 0.017698 | 0.041015 | 515 | 486 |
| RBPJ      | 0.104488 | 0.017695 | 0.041012 | 515 | 515 |
| LOC400931 | 0.104502 | 0.01768  | 0.040981 | 515 | 513 |
| HMGA2     | 0.104545 | 0.017633 | 0.040887 | 515 | 499 |
| SGPP1     | 0.104564 | 0.017612 | 0.040847 | 515 | 515 |
| UTP18     | 0.104621 | 0.01755  | 0.040714 | 515 | 515 |
| NRG1      | 0.104659 | 0.017509 | 0.040628 | 515 | 511 |
| ZDHHC21   | 0.104724 | 0.017439 | 0.040474 | 515 | 515 |
| PPP4R1L   | 0.104763 | 0.017396 | 0.040385 | 515 | 515 |
| ABHD5     | 0.104779 | 0.017379 | 0.040349 | 515 | 515 |
| WDR76     | 0.104781 | 0.017377 | 0.040349 | 515 | 515 |
| SP4       | 0.104795 | 0.017362 | 0.040324 | 515 | 515 |
| TRAF3IP2  | 0.104803 | 0.017353 | 0.040308 | 515 | 515 |
| PGA3      | 0.104817 | 0.017338 | 0.040279 | 515 | 368 |



|          |          |          |          |     |     |
|----------|----------|----------|----------|-----|-----|
| CCNI     | 0.104858 | 0.017295 | 0.040196 | 515 | 515 |
| GSX2     | 0.104878 | 0.017273 | 0.040156 | 515 | 74  |
| WFDC9    | 0.10488  | 0.01727  | 0.040154 | 515 | 4   |
| NFIX     | 0.104903 | 0.017246 | 0.040106 | 515 | 515 |
| C18orf34 | 0.10491  | 0.017239 | 0.040094 | 515 | 403 |
| SFRS18   | 0.105033 | 0.017108 | 0.039809 | 515 | 515 |
| HAS3     | 0.105047 | 0.017093 | 0.039781 | 515 | 515 |
| ZNF284   | 0.105069 | 0.01707  | 0.039733 | 515 | 515 |
| EDA      | 0.105111 | 0.017026 | 0.03964  | 515 | 515 |
| CRYGS    | 0.105134 | 0.017001 | 0.039593 | 515 | 514 |
| S100A10  | 0.105138 | 0.016997 | 0.039591 | 515 | 515 |
| BCM01    | 0.10516  | 0.016973 | 0.03955  | 515 | 501 |
| ANKIB1   | 0.105191 | 0.016941 | 0.039485 | 515 | 515 |
| RPL21P44 | 0.105228 | 0.016902 | 0.039408 | 515 | 471 |
| NCOA7    | 0.105252 | 0.016877 | 0.039358 | 515 | 515 |
| PAPL     | 0.105266 | 0.016862 | 0.039332 | 515 | 334 |
| GLIPR1L2 | 0.105326 | 0.016799 | 0.039198 | 515 | 511 |
| CHCHD6   | 0.105361 | 0.016762 | 0.039127 | 515 | 515 |
| PLOD2    | 0.105362 | 0.016761 | 0.039127 | 515 | 515 |
| POLR3GL  | 0.105379 | 0.016743 | 0.039097 | 515 | 515 |
| SHKBP1   | 0.105417 | 0.016704 | 0.039019 | 515 | 515 |
| PPIAL4D  | 0.105427 | 0.016694 | 0.038999 | 515 | 468 |
| VTI1A    | 0.105479 | 0.01664  | 0.038886 | 515 | 515 |
| MCF2     | 0.10548  | 0.016639 | 0.038886 | 515 | 418 |
| GPER     | 0.105495 | 0.016624 | 0.038858 | 515 | 515 |
| CPXM2    | 0.105522 | 0.016596 | 0.038815 | 515 | 515 |
| PYDC1    | 0.105535 | 0.016582 | 0.038788 | 515 | 147 |
| OR2T5    | 0.105567 | 0.016549 | 0.03872  | 515 | 30  |
| ACADL    | 0.105573 | 0.016542 | 0.038709 | 515 | 496 |
| S1PR3    | 0.105627 | 0.016487 | 0.038607 | 515 | 515 |
| OTUD6B   | 0.105653 | 0.01646  | 0.038562 | 515 | 515 |
| FANCD2   | 0.105663 | 0.01645  | 0.038542 | 515 | 515 |
| NAALAD2  | 0.1057   | 0.016413 | 0.038463 | 515 | 515 |
| PABPC4L  | 0.105701 | 0.016411 | 0.038463 | 515 | 515 |
| DENND1A  | 0.105712 | 0.0164   | 0.038444 | 515 | 515 |
| YY2      | 0.10572  | 0.016392 | 0.038429 | 515 | 513 |
| DBI      | 0.105735 | 0.016376 | 0.038397 | 515 | 515 |
| C12orf24 | 0.105738 | 0.016374 | 0.038395 | 515 | 515 |
| KIAA1614 | 0.105791 | 0.01632  | 0.038273 | 515 | 515 |
| MCAM     | 0.105827 | 0.016283 | 0.038191 | 515 | 515 |
| TPM3     | 0.105982 | 0.016126 | 0.037858 | 515 | 515 |
| ZBTB11   | 0.106024 | 0.016084 | 0.037786 | 515 | 515 |
| CHIC2    | 0.106079 | 0.016029 | 0.037666 | 515 | 515 |
| ADAMTS3  | 0.10608  | 0.016028 | 0.037666 | 515 | 515 |
| PSMA3    | 0.106178 | 0.01593  | 0.037468 | 515 | 515 |
| C2orf69  | 0.106211 | 0.015897 | 0.037404 | 515 | 515 |
| MASP1    | 0.106217 | 0.01589  | 0.037393 | 515 | 514 |
| DOCK3    | 0.106231 | 0.015877 | 0.037365 | 515 | 515 |
| TUBA4A   | 0.106262 | 0.015846 | 0.037297 | 515 | 515 |
| SPATA12  | 0.106266 | 0.015842 | 0.037293 | 515 | 511 |
| TUBE1    | 0.106349 | 0.01576  | 0.037129 | 515 | 515 |
| COL17A1  | 0.1064   | 0.015709 | 0.037028 | 515 | 514 |
| PRRG4    | 0.106434 | 0.015676 | 0.036962 | 515 | 515 |
| SLC19A3  | 0.106466 | 0.015644 | 0.036897 | 515 | 515 |

|           |          |          |          |     |     |
|-----------|----------|----------|----------|-----|-----|
| C4orf43   | 0.106482 | 0.015629 | 0.036866 | 515 | 515 |
| NEK7      | 0.106482 | 0.015629 | 0.036866 | 515 | 515 |
| NOS2      | 0.106487 | 0.015624 | 0.036862 | 515 | 509 |
| KRT86     | 0.106541 | 0.015571 | 0.036746 | 515 | 513 |
| ZNF573    | 0.106546 | 0.015567 | 0.036739 | 515 | 515 |
| IL17RB    | 0.106554 | 0.015559 | 0.036729 | 515 | 515 |
| LOC723809 | 0.106578 | 0.015535 | 0.036686 | 515 | 478 |
| C9orf130  | 0.10662  | 0.015494 | 0.036608 | 515 | 515 |
| LTB4R2    | 0.106629 | 0.015485 | 0.03659  | 515 | 515 |
| TMEM50A   | 0.106679 | 0.015437 | 0.036485 | 515 | 515 |
| ANKRD36BF | 0.106692 | 0.015424 | 0.036464 | 515 | 514 |
| CCNE1     | 0.106721 | 0.015396 | 0.03641  | 515 | 515 |
| C8B       | 0.106726 | 0.015392 | 0.036404 | 515 | 447 |
| C4orf41   | 0.106728 | 0.015389 | 0.036402 | 515 | 515 |
| TUBA1B    | 0.106742 | 0.015376 | 0.036379 | 515 | 515 |
| GMPR      | 0.106754 | 0.015364 | 0.03636  | 515 | 515 |
| ELMOD3    | 0.106769 | 0.01535  | 0.036335 | 515 | 515 |
| PCNP      | 0.106803 | 0.015317 | 0.036265 | 515 | 515 |
| COMMD2    | 0.106813 | 0.015307 | 0.036247 | 515 | 515 |
| ZNF264    | 0.106879 | 0.015244 | 0.036115 | 515 | 515 |
| C6orf211  | 0.106926 | 0.015199 | 0.036028 | 515 | 515 |
| PFN1      | 0.106976 | 0.015151 | 0.035933 | 515 | 515 |
| NEFH      | 0.10698  | 0.015148 | 0.035929 | 515 | 515 |
| MXRA8     | 0.106989 | 0.015139 | 0.035913 | 515 | 515 |
| UBE2E1    | 0.107022 | 0.015108 | 0.035847 | 515 | 515 |
| GADD45B   | 0.107035 | 0.015095 | 0.035824 | 515 | 515 |
| UBE2Q2    | 0.107082 | 0.01505  | 0.035736 | 515 | 515 |
| C14orf43  | 0.107082 | 0.01505  | 0.035736 | 515 | 515 |
| MICAL3    | 0.107107 | 0.015026 | 0.035692 | 515 | 515 |
| FBXO8     | 0.107128 | 0.015007 | 0.035649 | 515 | 515 |
| FGFR10P   | 0.107135 | 0.015    | 0.035637 | 515 | 515 |
| RSPRY1    | 0.107162 | 0.014974 | 0.035581 | 515 | 515 |
| CYLC1     | 0.107173 | 0.014965 | 0.035562 | 515 | 8   |
| OXCT1     | 0.107184 | 0.014954 | 0.035545 | 515 | 515 |
| PACRG     | 0.107205 | 0.014934 | 0.035501 | 515 | 479 |
| TNFSF15   | 0.10721  | 0.014929 | 0.035495 | 515 | 514 |
| MYNN      | 0.107268 | 0.014875 | 0.035383 | 515 | 515 |
| SNX30     | 0.10727  | 0.014873 | 0.035383 | 515 | 515 |
| MOCOS     | 0.107339 | 0.014808 | 0.035241 | 515 | 515 |
| LYRM2     | 0.107342 | 0.014805 | 0.035238 | 515 | 515 |
| WDR78     | 0.107345 | 0.014803 | 0.035238 | 515 | 515 |
| ZNF835    | 0.107351 | 0.014797 | 0.035231 | 515 | 506 |
| TRPC4     | 0.107355 | 0.014794 | 0.035227 | 515 | 514 |
| ADAMTS15  | 0.107367 | 0.014782 | 0.035204 | 515 | 504 |
| SFT2D1    | 0.107395 | 0.014756 | 0.03515  | 515 | 515 |
| ANKRD12   | 0.107432 | 0.014721 | 0.035071 | 515 | 515 |
| PLEKHG7   | 0.107483 | 0.014674 | 0.034971 | 515 | 510 |
| DIO3      | 0.107514 | 0.014646 | 0.034909 | 515 | 485 |
| CBFB      | 0.107559 | 0.014603 | 0.034824 | 515 | 515 |
| 1-Dec     | 0.107579 | 0.014585 | 0.034788 | 515 | 109 |
| C11orf58  | 0.107615 | 0.014552 | 0.034713 | 515 | 515 |
| CDR2      | 0.107634 | 0.014534 | 0.034675 | 515 | 515 |
| UBE2D2    | 0.107656 | 0.014514 | 0.034631 | 515 | 515 |
| CCNG1     | 0.107687 | 0.014486 | 0.034577 | 515 | 515 |

|           |          |          |          |     |     |
|-----------|----------|----------|----------|-----|-----|
| ZNF626    | 0.107785 | 0.014397 | 0.034372 | 515 | 515 |
| IFLTD1    | 0.107817 | 0.014367 | 0.03431  | 515 | 257 |
| DDX20     | 0.107826 | 0.014359 | 0.034294 | 515 | 515 |
| STARD3    | 0.107826 | 0.014359 | 0.034294 | 515 | 515 |
| AZU1      | 0.107827 | 0.014358 | 0.034294 | 515 | 440 |
| OR7E24    | 0.107843 | 0.014343 | 0.034269 | 515 | 45  |
| RLF       | 0.107862 | 0.014326 | 0.034235 | 515 | 515 |
| PPP1R9B   | 0.107869 | 0.01432  | 0.034228 | 515 | 515 |
| FOXS1     | 0.107881 | 0.014309 | 0.034208 | 515 | 515 |
| PLVAP     | 0.107974 | 0.014225 | 0.034023 | 515 | 515 |
| DNAI1     | 0.108    | 0.014202 | 0.033987 | 515 | 474 |
| FAM19A2   | 0.108029 | 0.014175 | 0.033927 | 515 | 509 |
| LOC147804 | 0.108094 | 0.014116 | 0.033804 | 515 | 515 |
| RAB35     | 0.108126 | 0.014088 | 0.033744 | 515 | 515 |
| ZBTB33    | 0.108146 | 0.01407  | 0.033705 | 515 | 515 |
| NGEF      | 0.108177 | 0.014043 | 0.033645 | 515 | 515 |
| ZNF667    | 0.108246 | 0.013981 | 0.033512 | 515 | 515 |
| GJB3      | 0.108253 | 0.013975 | 0.033505 | 515 | 509 |
| PASK      | 0.108289 | 0.013943 | 0.03344  | 515 | 515 |
| CHRNE     | 0.108312 | 0.013923 | 0.033396 | 515 | 514 |
| TCP11L1   | 0.108322 | 0.013914 | 0.033379 | 515 | 515 |
| C7orf69   | 0.108341 | 0.013897 | 0.033346 | 515 | 279 |
| PPHLN1    | 0.108347 | 0.013891 | 0.033336 | 515 | 515 |
| GPR44     | 0.108364 | 0.013877 | 0.03331  | 515 | 511 |
| EEF1A1P9  | 0.108368 | 0.013873 | 0.033304 | 515 | 515 |
| TGFB2     | 0.108383 | 0.01386  | 0.03328  | 515 | 515 |
| GK        | 0.108432 | 0.013817 | 0.033189 | 515 | 515 |
| ENDOD1    | 0.108486 | 0.013769 | 0.033087 | 515 | 515 |
| SLC22A15  | 0.108493 | 0.013763 | 0.033076 | 515 | 515 |
| GAS2L2    | 0.108576 | 0.01369  | 0.032913 | 515 | 495 |
| GOLIM4    | 0.108577 | 0.01369  | 0.032913 | 515 | 515 |
| SH3TC1    | 0.108619 | 0.013653 | 0.032835 | 515 | 515 |
| SBSN      | 0.108634 | 0.01364  | 0.032812 | 515 | 424 |
| SCAND3    | 0.108639 | 0.013636 | 0.032806 | 515 | 507 |
| ARL14     | 0.10865  | 0.013626 | 0.032787 | 515 | 450 |
| ERP44     | 0.108736 | 0.013552 | 0.032631 | 515 | 515 |
| ZNF673    | 0.108746 | 0.013543 | 0.032613 | 515 | 515 |
| WNT9B     | 0.108771 | 0.013521 | 0.032569 | 515 | 430 |
| SYCE1     | 0.108813 | 0.013485 | 0.032498 | 515 | 323 |
| NKX2-8    | 0.108819 | 0.01348  | 0.03249  | 515 | 505 |
| RPS6KA5   | 0.10883  | 0.01347  | 0.03247  | 515 | 515 |
| KIAA1826  | 0.108854 | 0.013449 | 0.032428 | 515 | 515 |
| ADRBK1    | 0.108875 | 0.013432 | 0.032389 | 515 | 515 |
| FRMPD1    | 0.108941 | 0.013375 | 0.032276 | 515 | 407 |
| ZNF879    | 0.108976 | 0.013346 | 0.032212 | 515 | 515 |
| SLC25A24  | 0.108976 | 0.013345 | 0.032212 | 515 | 515 |
| PPP1R3G   | 0.108999 | 0.013325 | 0.032171 | 515 | 513 |
| SAR1B     | 0.109015 | 0.013312 | 0.032144 | 515 | 515 |
| C6orf62   | 0.109052 | 0.013281 | 0.032076 | 515 | 515 |
| ZNF93     | 0.109137 | 0.013208 | 0.031916 | 515 | 515 |
| ZNF227    | 0.109171 | 0.01318  | 0.031851 | 515 | 515 |
| ACTR10    | 0.109193 | 0.013161 | 0.031813 | 515 | 515 |
| FANCB     | 0.1092   | 0.013155 | 0.031807 | 515 | 515 |
| PLA2G4E   | 0.109255 | 0.013109 | 0.031699 | 515 | 466 |

|           |          |          |          |     |     |
|-----------|----------|----------|----------|-----|-----|
| APOBEC4   | 0.109294 | 0.013077 | 0.031632 | 515 | 432 |
| HAUS3     | 0.109302 | 0.01307  | 0.031619 | 515 | 515 |
| TBP       | 0.109307 | 0.013066 | 0.031613 | 515 | 515 |
| IL22      | 0.109334 | 0.013043 | 0.031566 | 515 | 65  |
| KIAA0664F | 0.109336 | 0.013041 | 0.031565 | 515 | 515 |
| H2AFY     | 0.109379 | 0.013005 | 0.031486 | 515 | 515 |
| LOC285401 | 0.10938  | 0.013004 | 0.031486 | 515 | 128 |
| DNAJC8    | 0.109399 | 0.012989 | 0.031457 | 515 | 515 |
| ACAA2     | 0.109402 | 0.012986 | 0.031455 | 515 | 515 |
| C3orf36   | 0.109403 | 0.012985 | 0.031455 | 515 | 507 |
| FBXO27    | 0.10943  | 0.012963 | 0.031414 | 515 | 514 |
| MDH1B     | 0.109468 | 0.012931 | 0.031359 | 515 | 511 |
| SPAG9     | 0.109484 | 0.012918 | 0.031332 | 515 | 515 |
| ZDHHC17   | 0.109492 | 0.012911 | 0.031323 | 515 | 515 |
| TGFB111   | 0.109522 | 0.012886 | 0.03127  | 515 | 515 |
| SNORA54   | 0.109524 | 0.012885 | 0.03127  | 515 | 22  |
| ODZ2      | 0.109536 | 0.012875 | 0.03125  | 515 | 496 |
| ALDH1A2   | 0.109549 | 0.012864 | 0.031228 | 515 | 515 |
| EXOSC9    | 0.10955  | 0.012863 | 0.031228 | 515 | 515 |
| LOC284578 | 0.109552 | 0.012861 | 0.031228 | 515 | 505 |
| RASL11A   | 0.109557 | 0.012857 | 0.031223 | 515 | 515 |
| GSDMD     | 0.109557 | 0.012857 | 0.031223 | 515 | 515 |
| TMEM185A  | 0.109565 | 0.012851 | 0.031217 | 515 | 515 |
| LOC541473 | 0.1096   | 0.012822 | 0.031153 | 515 | 493 |
| UACA      | 0.109649 | 0.012782 | 0.03108  | 515 | 515 |
| ZNF490    | 0.109651 | 0.01278  | 0.031079 | 515 | 515 |
| NWD1      | 0.109695 | 0.012744 | 0.030999 | 515 | 503 |
| RAB24     | 0.109703 | 0.012737 | 0.030988 | 515 | 515 |
| IGSF10    | 0.109722 | 0.012721 | 0.030956 | 515 | 515 |
| KCNQ3     | 0.109738 | 0.012708 | 0.030932 | 515 | 515 |
| ARL9      | 0.109758 | 0.012693 | 0.030898 | 515 | 493 |
| GGH       | 0.109791 | 0.012665 | 0.030839 | 515 | 515 |
| YPEL5     | 0.109804 | 0.012655 | 0.030816 | 515 | 515 |
| RPL36AL   | 0.109832 | 0.012632 | 0.030766 | 515 | 515 |
| ZNF211    | 0.109907 | 0.012572 | 0.030633 | 515 | 515 |
| SBDSP1    | 0.109928 | 0.012554 | 0.030598 | 515 | 515 |
| ZFP36     | 0.109932 | 0.012551 | 0.030595 | 515 | 515 |
| FAM53C    | 0.109951 | 0.012536 | 0.030564 | 515 | 515 |
| GOPC      | 0.109999 | 0.012497 | 0.030473 | 515 | 515 |
| IQCB1     | 0.110025 | 0.012476 | 0.030425 | 515 | 515 |
| AK3       | 0.110053 | 0.012454 | 0.030378 | 515 | 515 |
| DNTTIP1   | 0.110068 | 0.012441 | 0.030352 | 515 | 515 |
| TMEM86B   | 0.110069 | 0.012441 | 0.030352 | 515 | 515 |
| PRELID1   | 0.110098 | 0.012417 | 0.030313 | 515 | 515 |
| CDH10     | 0.110102 | 0.012414 | 0.030313 | 515 | 353 |
| PDZK1IP1  | 0.11024  | 0.012304 | 0.030058 | 515 | 514 |
| FLCN      | 0.110259 | 0.012289 | 0.030025 | 515 | 515 |
| GAP43     | 0.11034  | 0.012225 | 0.0299   | 515 | 469 |
| CCNT1     | 0.11035  | 0.012217 | 0.029893 | 515 | 515 |
| INPP5F    | 0.110486 | 0.01211  | 0.029653 | 515 | 515 |
| LRRC50    | 0.110512 | 0.01209  | 0.02961  | 515 | 509 |
| LRRC67    | 0.110533 | 0.012073 | 0.029577 | 515 | 304 |
| FLJ43663  | 0.110571 | 0.012044 | 0.029512 | 515 | 515 |
| FUT4      | 0.110623 | 0.012004 | 0.029417 | 515 | 515 |

|           |          |          |          |     |     |
|-----------|----------|----------|----------|-----|-----|
| ANKRD20A3 | 0.110623 | 0.012004 | 0.029417 | 515 | 491 |
| SLITRK3   | 0.110641 | 0.011989 | 0.029403 | 515 | 417 |
| MFSD4     | 0.110643 | 0.011987 | 0.029403 | 515 | 515 |
| ZNF449    | 0.110676 | 0.011962 | 0.029347 | 515 | 515 |
| NR1D2     | 0.110699 | 0.011945 | 0.029312 | 515 | 515 |
| MFSD8     | 0.1107   | 0.011943 | 0.029312 | 515 | 515 |
| RLBP1     | 0.110709 | 0.011936 | 0.029299 | 515 | 131 |
| ZNF367    | 0.110717 | 0.01193  | 0.029288 | 515 | 515 |
| VILL      | 0.110718 | 0.011929 | 0.029288 | 515 | 515 |
| SCGB3A1   | 0.110752 | 0.011903 | 0.029232 | 515 | 512 |
| PM2OD2    | 0.110762 | 0.011896 | 0.029218 | 515 | 515 |
| CBLL1     | 0.110766 | 0.011893 | 0.029213 | 515 | 515 |
| TCIRG1    | 0.110782 | 0.01188  | 0.029194 | 515 | 515 |
| FGFR1     | 0.110901 | 0.011789 | 0.028997 | 515 | 515 |
| DNM3      | 0.110953 | 0.011749 | 0.028918 | 515 | 515 |
| CCL15     | 0.111021 | 0.011697 | 0.028815 | 515 | 440 |
| GTF2A1L   | 0.111068 | 0.011662 | 0.028742 | 515 | 407 |
| CLDN20    | 0.111104 | 0.011635 | 0.028682 | 515 | 423 |
| SPATA8    | 0.111131 | 0.011614 | 0.028646 | 515 | 206 |
| SFRS2     | 0.111177 | 0.01158  | 0.028575 | 515 | 515 |
| LCT       | 0.1112   | 0.011562 | 0.028534 | 515 | 438 |
| ADCK2     | 0.111206 | 0.011557 | 0.028527 | 515 | 515 |
| ZNF391    | 0.111219 | 0.011548 | 0.028513 | 515 | 514 |
| RIOK2     | 0.111239 | 0.011533 | 0.028483 | 515 | 515 |
| FER       | 0.111285 | 0.011499 | 0.028406 | 515 | 515 |
| CA13      | 0.11129  | 0.011495 | 0.028403 | 515 | 515 |
| C5orf23   | 0.1113   | 0.011487 | 0.028393 | 515 | 515 |
| C22orf45  | 0.111302 | 0.011485 | 0.028391 | 515 | 491 |
| TUB       | 0.111326 | 0.011468 | 0.028358 | 515 | 515 |
| HSPA8     | 0.111372 | 0.011433 | 0.02828  | 515 | 515 |
| CNTN6     | 0.111377 | 0.01143  | 0.028274 | 515 | 455 |
| LOC644538 | 0.111402 | 0.011411 | 0.028238 | 515 | 515 |
| SNTN      | 0.111425 | 0.011394 | 0.028211 | 515 | 491 |
| CCDC68    | 0.111471 | 0.01136  | 0.028131 | 515 | 515 |
| TRIM32    | 0.111532 | 0.011315 | 0.028025 | 515 | 515 |
| ZNF83     | 0.111536 | 0.011312 | 0.028021 | 515 | 515 |
| GLCCI1    | 0.111536 | 0.011312 | 0.028021 | 515 | 515 |
| ROPN1L    | 0.111547 | 0.011304 | 0.028012 | 515 | 504 |
| AKR1A1    | 0.111588 | 0.011273 | 0.027943 | 515 | 515 |
| IL28A     | 0.111596 | 0.011268 | 0.027932 | 515 | 100 |
| KIAA1009  | 0.111615 | 0.011254 | 0.027901 | 515 | 515 |
| OXTR      | 0.111624 | 0.011247 | 0.027889 | 515 | 515 |
| EVC       | 0.111695 | 0.011195 | 0.02777  | 515 | 515 |
| DLEC1     | 0.111696 | 0.011194 | 0.02777  | 515 | 514 |
| FOXI2     | 0.111731 | 0.011169 | 0.027726 | 515 | 379 |
| MAP1B     | 0.111793 | 0.011124 | 0.02762  | 515 | 515 |
| FABP7     | 0.111806 | 0.011114 | 0.027607 | 515 | 375 |
| GBE1      | 0.111815 | 0.011108 | 0.027595 | 515 | 515 |
| CNTFR     | 0.111818 | 0.011106 | 0.027593 | 515 | 435 |
| PSD4      | 0.111857 | 0.011077 | 0.027525 | 515 | 515 |
| PUS7L     | 0.11187  | 0.011068 | 0.027512 | 515 | 515 |
| CDKN2A    | 0.111918 | 0.011034 | 0.027434 | 515 | 515 |
| SYNJ2     | 0.111929 | 0.011025 | 0.027416 | 515 | 515 |
| ANKRD36B  | 0.111997 | 0.010976 | 0.027315 | 515 | 514 |

|          |          |          |          |     |     |
|----------|----------|----------|----------|-----|-----|
| GTPBP8   | 0.112004 | 0.010971 | 0.027309 | 515 | 515 |
| ZNF460   | 0.112006 | 0.01097  | 0.027309 | 515 | 515 |
| RBP4     | 0.112027 | 0.010955 | 0.027279 | 515 | 513 |
| DTWD2    | 0.112079 | 0.010917 | 0.027202 | 515 | 515 |
| HTR2B    | 0.112087 | 0.010912 | 0.027198 | 515 | 515 |
| CORIN    | 0.112102 | 0.010901 | 0.027175 | 515 | 515 |
| LASS5    | 0.112107 | 0.010898 | 0.02717  | 515 | 515 |
| PDLIM1   | 0.112157 | 0.010862 | 0.027099 | 515 | 515 |
| MYOF     | 0.112183 | 0.010844 | 0.027056 | 515 | 515 |
| PCYT1B   | 0.112198 | 0.010833 | 0.027033 | 515 | 512 |
| CXorf56  | 0.112205 | 0.010828 | 0.027024 | 515 | 515 |
| MCM6     | 0.112246 | 0.010799 | 0.026957 | 515 | 515 |
| EML1     | 0.112273 | 0.01078  | 0.026919 | 515 | 515 |
| KLHL13   | 0.112294 | 0.010765 | 0.026887 | 515 | 515 |
| PTPRH    | 0.112335 | 0.010736 | 0.02682  | 515 | 513 |
| RUNX2    | 0.112336 | 0.010735 | 0.02682  | 515 | 515 |
| GLUL     | 0.112337 | 0.010735 | 0.02682  | 515 | 515 |
| RFPL4A   | 0.112414 | 0.010681 | 0.026699 | 515 | 204 |
| KIAA1644 | 0.112425 | 0.010673 | 0.026687 | 515 | 514 |
| TWSG1    | 0.112444 | 0.01066  | 0.026657 | 515 | 515 |
| CDKL2    | 0.112543 | 0.01059  | 0.026503 | 515 | 514 |
| EEF1A1   | 0.112557 | 0.010581 | 0.026482 | 515 | 515 |
| CASP8AP2 | 0.112608 | 0.010546 | 0.026411 | 515 | 515 |
| SCG5     | 0.112616 | 0.01054  | 0.026401 | 515 | 514 |
| ORMDL1   | 0.112623 | 0.010535 | 0.026395 | 515 | 515 |
| RTN4IP1  | 0.112646 | 0.010519 | 0.026358 | 515 | 515 |
| PLEKHM2  | 0.112659 | 0.01051  | 0.026339 | 515 | 515 |
| FBLN7    | 0.112685 | 0.010493 | 0.026301 | 515 | 515 |
| ZNF543   | 0.112747 | 0.01045  | 0.026203 | 515 | 515 |
| SERTAD2  | 0.112781 | 0.010426 | 0.026157 | 515 | 515 |
| SLC46A2  | 0.112793 | 0.010418 | 0.02614  | 515 | 515 |
| SNX24    | 0.112798 | 0.010414 | 0.026134 | 515 | 515 |
| HOXB2    | 0.112816 | 0.010402 | 0.026108 | 515 | 515 |
| VWDE     | 0.112841 | 0.010385 | 0.026071 | 515 | 502 |
| MMP11    | 0.112887 | 0.010354 | 0.025999 | 515 | 515 |
| RCAN3    | 0.112899 | 0.010346 | 0.025985 | 515 | 515 |
| ANAPC10  | 0.112902 | 0.010344 | 0.025983 | 515 | 515 |
| VEPH1    | 0.112903 | 0.010343 | 0.025983 | 515 | 513 |
| CLASP2   | 0.112956 | 0.010307 | 0.025907 | 515 | 515 |
| ZNF502   | 0.113006 | 0.010273 | 0.025828 | 515 | 515 |
| PRSS35   | 0.113029 | 0.010257 | 0.025795 | 515 | 508 |
| C7orf57  | 0.11303  | 0.010257 | 0.025795 | 515 | 508 |
| C4orf21  | 0.113107 | 0.010205 | 0.025682 | 515 | 515 |
| ACSS3    | 0.113173 | 0.01016  | 0.025573 | 515 | 515 |
| RAB38    | 0.113181 | 0.010155 | 0.025566 | 515 | 515 |
| PEG3AS   | 0.113199 | 0.010143 | 0.025539 | 515 | 200 |
| MS4A8B   | 0.113205 | 0.010139 | 0.025533 | 515 | 470 |
| C1orf212 | 0.113207 | 0.010137 | 0.025532 | 515 | 515 |
| TPPP3    | 0.113255 | 0.010106 | 0.025462 | 515 | 515 |
| VAT1L    | 0.113288 | 0.010083 | 0.025413 | 515 | 512 |
| EIF3K    | 0.113342 | 0.010048 | 0.025332 | 515 | 515 |
| NME5     | 0.113348 | 0.010044 | 0.025326 | 515 | 514 |
| C6orf165 | 0.1134   | 0.010009 | 0.025247 | 515 | 511 |
| CA2      | 0.113411 | 0.010002 | 0.025233 | 515 | 515 |

|           |          |          |          |     |     |
|-----------|----------|----------|----------|-----|-----|
| CCNG2     | 0.113461 | 0.009969 | 0.025162 | 515 | 515 |
| SYN2      | 0.113477 | 0.009958 | 0.025138 | 515 | 466 |
| ZNF276    | 0.113506 | 0.009939 | 0.025096 | 515 | 515 |
| NCRNA0011 | 0.113531 | 0.009923 | 0.025061 | 515 | 234 |
| TSPYL4    | 0.113575 | 0.009894 | 0.025004 | 515 | 515 |
| NOD1      | 0.113774 | 0.009765 | 0.024712 | 515 | 515 |
| TAF7      | 0.113786 | 0.009757 | 0.024695 | 515 | 515 |
| NDUFB5    | 0.113798 | 0.009749 | 0.024682 | 515 | 515 |
| PFKFB4    | 0.113807 | 0.009743 | 0.024673 | 515 | 515 |
| FAT3      | 0.113821 | 0.009734 | 0.024654 | 515 | 510 |
| HYDIN     | 0.113822 | 0.009734 | 0.024654 | 515 | 515 |
| RXFP3     | 0.113879 | 0.009697 | 0.024583 | 515 | 201 |
| METTL7B   | 0.113892 | 0.009688 | 0.024565 | 515 | 515 |
| PLA2G12B  | 0.113972 | 0.009637 | 0.024451 | 515 | 450 |
| C6orf35   | 0.113974 | 0.009636 | 0.024451 | 515 | 515 |
| C14orf132 | 0.114161 | 0.009517 | 0.024167 | 515 | 515 |
| SPEG      | 0.114161 | 0.009517 | 0.024167 | 515 | 515 |
| JOSD1     | 0.114233 | 0.009471 | 0.02407  | 515 | 515 |
| ELP4      | 0.114271 | 0.009448 | 0.024022 | 515 | 515 |
| GUCY2F    | 0.114329 | 0.009411 | 0.023941 | 515 | 125 |
| EHD3      | 0.11436  | 0.009392 | 0.023904 | 515 | 515 |
| RTN4RL1   | 0.114383 | 0.009377 | 0.023873 | 515 | 515 |
| ZNF558    | 0.114438 | 0.009343 | 0.023795 | 515 | 515 |
| ARMC2     | 0.114449 | 0.009336 | 0.023783 | 515 | 515 |
| FAM38A    | 0.114569 | 0.009262 | 0.023612 | 515 | 515 |
| TEKT3     | 0.114686 | 0.00919  | 0.023447 | 515 | 493 |
| FLJ43390  | 0.114711 | 0.009174 | 0.023411 | 515 | 384 |
| FAM175A   | 0.114733 | 0.009161 | 0.02338  | 515 | 515 |
| ZNF510    | 0.114742 | 0.009155 | 0.023371 | 515 | 515 |
| PRIM2     | 0.11476  | 0.009144 | 0.023346 | 515 | 515 |
| SIRT2     | 0.114764 | 0.009142 | 0.023344 | 515 | 515 |
| CSF3      | 0.114785 | 0.009129 | 0.023317 | 515 | 492 |
| RGPD1     | 0.11479  | 0.009126 | 0.023312 | 515 | 515 |
| EGR4      | 0.114825 | 0.009105 | 0.023264 | 515 | 461 |
| FZD7      | 0.114845 | 0.009093 | 0.023237 | 515 | 515 |
| EML6      | 0.114869 | 0.009078 | 0.023212 | 515 | 515 |
| SNCB      | 0.114889 | 0.009066 | 0.023197 | 515 | 358 |
| SLC25A43  | 0.114937 | 0.009037 | 0.023139 | 515 | 515 |
| RRN3P3    | 0.11494  | 0.009035 | 0.023138 | 515 | 515 |
| LOC100216 | 0.114951 | 0.009028 | 0.023129 | 515 | 406 |
| PDGFC     | 0.115003 | 0.008997 | 0.023064 | 515 | 515 |
| HMHB1     | 0.115007 | 0.008995 | 0.023062 | 515 | 138 |
| C9orf144E | 0.11501  | 0.008993 | 0.02306  | 515 | 289 |
| CLUU10S   | 0.115019 | 0.008987 | 0.023049 | 515 | 337 |
| KCNJ12    | 0.115061 | 0.008962 | 0.022993 | 515 | 515 |
| TRAM1     | 0.115111 | 0.008932 | 0.022924 | 515 | 515 |
| PCDHB18   | 0.115208 | 0.008875 | 0.022789 | 515 | 512 |
| APOH      | 0.115209 | 0.008874 | 0.022789 | 515 | 485 |
| USF2      | 0.115333 | 0.008801 | 0.022625 | 515 | 515 |
| APOLD1    | 0.115351 | 0.00879  | 0.022602 | 515 | 515 |
| KRT84     | 0.115406 | 0.008758 | 0.022535 | 515 | 57  |
| CEP170    | 0.11541  | 0.008755 | 0.022531 | 515 | 515 |
| TMEM161B  | 0.11545  | 0.008732 | 0.02248  | 515 | 515 |
| NRAS      | 0.115513 | 0.008695 | 0.022396 | 515 | 515 |

|           |          |          |          |     |     |
|-----------|----------|----------|----------|-----|-----|
| SPG20     | 0.115518 | 0.008692 | 0.022395 | 515 | 515 |
| RFTN1     | 0.11555  | 0.008673 | 0.022358 | 515 | 515 |
| HAUS2     | 0.115551 | 0.008672 | 0.022358 | 515 | 515 |
| MATN3     | 0.115553 | 0.008671 | 0.022358 | 515 | 515 |
| ZMYM5     | 0.115607 | 0.00864  | 0.022284 | 515 | 515 |
| SORCS2    | 0.115628 | 0.008628 | 0.022256 | 515 | 515 |
| WDR47     | 0.115675 | 0.0086   | 0.022196 | 515 | 515 |
| SFRS2IP   | 0.115686 | 0.008594 | 0.022182 | 515 | 515 |
| ABCC12    | 0.115705 | 0.008583 | 0.02216  | 515 | 286 |
| ST6GALNAC | 0.115765 | 0.008549 | 0.022074 | 515 | 515 |
| PPP1R12B  | 0.115812 | 0.008522 | 0.022016 | 515 | 515 |
| C1GALT1   | 0.115851 | 0.008499 | 0.021963 | 515 | 515 |
| FBXL17    | 0.115886 | 0.008479 | 0.021917 | 515 | 515 |
| ELAC1     | 0.115918 | 0.008461 | 0.021873 | 515 | 515 |
| ZNF813    | 0.11593  | 0.008454 | 0.021858 | 515 | 515 |
| IL11RA    | 0.115931 | 0.008454 | 0.021858 | 515 | 515 |
| PTPRN2    | 0.115935 | 0.008451 | 0.021856 | 515 | 515 |
| CNTNAP1   | 0.115942 | 0.008447 | 0.021849 | 515 | 515 |
| GTF2B     | 0.115944 | 0.008447 | 0.021849 | 515 | 515 |
| GOLGA9P   | 0.115983 | 0.008425 | 0.021806 | 515 | 349 |
| PRSS21    | 0.116003 | 0.008413 | 0.021785 | 515 | 491 |
| ULBP2     | 0.11601  | 0.008409 | 0.021778 | 515 | 515 |
| C1orf152  | 0.116021 | 0.008403 | 0.021764 | 515 | 514 |
| ALDH8A1   | 0.116052 | 0.008385 | 0.021727 | 515 | 507 |
| LOC100130 | 0.116068 | 0.008376 | 0.021706 | 515 | 357 |
| ARHGEF10L | 0.116073 | 0.008373 | 0.021702 | 515 | 515 |
| ITGA9     | 0.116111 | 0.008352 | 0.021652 | 515 | 515 |
| PTAR1     | 0.116118 | 0.008348 | 0.021645 | 515 | 515 |
| BTG1      | 0.116205 | 0.008299 | 0.02153  | 515 | 515 |
| HIGD1B    | 0.116212 | 0.008295 | 0.021522 | 515 | 515 |
| ZFP161    | 0.116214 | 0.008294 | 0.021522 | 515 | 515 |
| ANPEP     | 0.116272 | 0.008262 | 0.021455 | 515 | 515 |
| GPR115    | 0.116322 | 0.008234 | 0.021394 | 515 | 502 |
| UCP2      | 0.116335 | 0.008227 | 0.021377 | 515 | 515 |
| C17orf57  | 0.116346 | 0.008221 | 0.021364 | 515 | 515 |
| EIF2S1    | 0.116367 | 0.008209 | 0.021342 | 515 | 515 |
| PMS2L4    | 0.116398 | 0.008191 | 0.021302 | 515 | 515 |
| RSPO2     | 0.116441 | 0.008168 | 0.021249 | 515 | 488 |
| C12orf41  | 0.116461 | 0.008157 | 0.021226 | 515 | 515 |
| FPGT      | 0.116516 | 0.008127 | 0.021153 | 515 | 515 |
| LPIN1     | 0.11654  | 0.008113 | 0.021122 | 515 | 515 |
| ABCC9     | 0.116561 | 0.008102 | 0.021099 | 515 | 515 |
| XKRX      | 0.116703 | 0.008024 | 0.020909 | 515 | 515 |
| ZNF273    | 0.116704 | 0.008024 | 0.020909 | 515 | 515 |
| ZNF44     | 0.116732 | 0.008009 | 0.020873 | 515 | 515 |
| SLC4A8    | 0.11679  | 0.007977 | 0.0208   | 515 | 515 |
| ADAMTS6   | 0.116797 | 0.007974 | 0.020793 | 515 | 515 |
| RPS6KA3   | 0.116805 | 0.007969 | 0.020784 | 515 | 515 |
| RGS20     | 0.116814 | 0.007964 | 0.020774 | 515 | 506 |
| DENND1B   | 0.116819 | 0.007961 | 0.020769 | 515 | 515 |
| SUN2      | 0.11683  | 0.007956 | 0.020757 | 515 | 515 |
| WHAMML1   | 0.116962 | 0.007885 | 0.020583 | 515 | 514 |
| OR2A9P    | 0.116965 | 0.007883 | 0.020582 | 515 | 515 |
| ASCL2     | 0.11699  | 0.00787  | 0.020552 | 515 | 515 |



|           |          |          |          |     |     |
|-----------|----------|----------|----------|-----|-----|
| MRPS22    | 0.116993 | 0.007868 | 0.02055  | 515 | 515 |
| AGTR1     | 0.117044 | 0.007841 | 0.020487 | 515 | 515 |
| CD81      | 0.117089 | 0.007817 | 0.02043  | 515 | 515 |
| HYAL4     | 0.117101 | 0.007811 | 0.020416 | 515 | 349 |
| C1QTNF6   | 0.117128 | 0.007796 | 0.020381 | 515 | 515 |
| ASIP      | 0.117159 | 0.007778 | 0.020343 | 515 | 321 |
| IL6R      | 0.117186 | 0.007766 | 0.020317 | 515 | 515 |
| KCND3     | 0.117223 | 0.007746 | 0.020276 | 515 | 496 |
| BLOC1S2   | 0.11723  | 0.007742 | 0.020269 | 515 | 515 |
| CCBL2     | 0.11724  | 0.007737 | 0.020261 | 515 | 515 |
| FAM119B   | 0.117279 | 0.007717 | 0.020211 | 515 | 515 |
| STBD1     | 0.117293 | 0.007709 | 0.020193 | 515 | 515 |
| SGMS2     | 0.117342 | 0.007684 | 0.020134 | 515 | 515 |
| SESN3     | 0.117345 | 0.007682 | 0.020133 | 515 | 515 |
| RAPGEF4   | 0.117435 | 0.007635 | 0.020028 | 515 | 515 |
| SNX21     | 0.117443 | 0.007631 | 0.02002  | 515 | 515 |
| RBL2      | 0.117532 | 0.007585 | 0.019909 | 515 | 515 |
| HTR3C     | 0.117543 | 0.007579 | 0.019897 | 515 | 266 |
| UBC       | 0.117571 | 0.007565 | 0.019868 | 515 | 515 |
| PCDHGB2   | 0.117603 | 0.007549 | 0.019829 | 515 | 514 |
| SWAP70    | 0.117604 | 0.007548 | 0.019829 | 515 | 515 |
| SPON2     | 0.117661 | 0.007519 | 0.019761 | 515 | 515 |
| GDF11     | 0.117694 | 0.007502 | 0.019727 | 515 | 515 |
| MIA2      | 0.117719 | 0.007489 | 0.019701 | 515 | 475 |
| C2orf74   | 0.117806 | 0.007445 | 0.0196   | 515 | 515 |
| DMTF1     | 0.117829 | 0.007433 | 0.019577 | 515 | 515 |
| MYH1      | 0.117837 | 0.007429 | 0.019569 | 515 | 301 |
| RTN2      | 0.117844 | 0.007425 | 0.019564 | 515 | 515 |
| FATE1     | 0.117883 | 0.007406 | 0.019521 | 515 | 485 |
| KCNA4     | 0.117897 | 0.007398 | 0.019504 | 515 | 379 |
| C14orf135 | 0.1179   | 0.007397 | 0.019503 | 515 | 515 |
| LZTS1     | 0.117901 | 0.007397 | 0.019503 | 515 | 515 |
| MT1X      | 0.117961 | 0.007366 | 0.01943  | 515 | 515 |
| LAMC2     | 0.118009 | 0.007342 | 0.019374 | 515 | 515 |
| ALDH1B1   | 0.118061 | 0.007316 | 0.019312 | 515 | 515 |
| OR52K2    | 0.118089 | 0.007302 | 0.019277 | 515 | 111 |
| REV3L     | 0.118102 | 0.007295 | 0.019263 | 515 | 515 |
| FDXACB1   | 0.118118 | 0.007287 | 0.019244 | 515 | 515 |
| ZNF843    | 0.118197 | 0.007248 | 0.019146 | 515 | 508 |
| LOC644936 | 0.118209 | 0.007242 | 0.019133 | 515 | 515 |
| LHFPL1    | 0.118213 | 0.007241 | 0.019131 | 515 | 440 |
| ANXA2     | 0.118241 | 0.007226 | 0.019095 | 515 | 515 |
| FADS3     | 0.118344 | 0.007176 | 0.018967 | 515 | 515 |
| TMX3      | 0.118465 | 0.007116 | 0.018834 | 515 | 515 |
| TMSB10    | 0.118543 | 0.007078 | 0.018745 | 515 | 515 |
| ILK       | 0.118548 | 0.007076 | 0.01874  | 515 | 515 |
| STOML3    | 0.118644 | 0.00703  | 0.018625 | 515 | 431 |
| C18orf18  | 0.118713 | 0.006996 | 0.018551 | 515 | 515 |
| BTN2A1    | 0.118724 | 0.006991 | 0.01854  | 515 | 515 |
| RNF113A   | 0.118755 | 0.006976 | 0.018505 | 515 | 515 |
| GIN1      | 0.118804 | 0.006953 | 0.018456 | 515 | 515 |
| WDR48     | 0.118953 | 0.006882 | 0.018286 | 515 | 515 |
| CCDC66    | 0.119014 | 0.006853 | 0.018221 | 515 | 515 |
| FGF1      | 0.11903  | 0.006845 | 0.018206 | 515 | 515 |

|           |          |          |          |     |     |
|-----------|----------|----------|----------|-----|-----|
| KIAA0408  | 0.119048 | 0.006837 | 0.018187 | 515 | 390 |
| ZC3H12B   | 0.119077 | 0.006823 | 0.018158 | 515 | 515 |
| ZNF600    | 0.119128 | 0.006799 | 0.018102 | 515 | 515 |
| OR2D3     | 0.11918  | 0.006775 | 0.018043 | 515 | 25  |
| GALNT8    | 0.119209 | 0.006761 | 0.018012 | 515 | 314 |
| TRIM6     | 0.119223 | 0.006755 | 0.018    | 515 | 515 |
| MTHFD1L   | 0.119235 | 0.00675  | 0.01799  | 515 | 515 |
| WDR54     | 0.119251 | 0.006742 | 0.017972 | 515 | 515 |
| HAUS6     | 0.119323 | 0.006708 | 0.01789  | 515 | 515 |
| SEC24A    | 0.119393 | 0.006676 | 0.017806 | 515 | 515 |
| C17orf42  | 0.119398 | 0.006674 | 0.017805 | 515 | 515 |
| LOC149620 | 0.119438 | 0.006656 | 0.017766 | 515 | 363 |
| ST8SIA6   | 0.119452 | 0.006649 | 0.017751 | 515 | 460 |
| PKIB      | 0.119461 | 0.006645 | 0.017743 | 515 | 515 |
| PTPRE     | 0.119498 | 0.006628 | 0.017702 | 515 | 515 |
| VWA5A     | 0.119508 | 0.006623 | 0.017692 | 515 | 515 |
| SKA2      | 0.119518 | 0.006619 | 0.017682 | 515 | 515 |
| ABHD13    | 0.119595 | 0.006584 | 0.017598 | 515 | 515 |
| AP2S1     | 0.119616 | 0.006574 | 0.017574 | 515 | 515 |
| IL1F5     | 0.119634 | 0.006566 | 0.017554 | 515 | 442 |
| NID2      | 0.119644 | 0.006561 | 0.017544 | 515 | 515 |
| CYP7A1    | 0.119662 | 0.006553 | 0.01753  | 515 | 304 |
| PCDHB15   | 0.119717 | 0.006528 | 0.017478 | 515 | 515 |
| TCTE3     | 0.11976  | 0.006509 | 0.017428 | 515 | 515 |
| WDR82     | 0.119791 | 0.006495 | 0.017395 | 515 | 515 |
| MAPKAP1   | 0.119806 | 0.006488 | 0.01738  | 515 | 515 |
| AOX1      | 0.119807 | 0.006488 | 0.01738  | 515 | 515 |
| FLJ34503  | 0.119888 | 0.006452 | 0.017288 | 515 | 281 |
| SLC12A6   | 0.119907 | 0.006443 | 0.017268 | 515 | 515 |
| OGFR      | 0.119921 | 0.006437 | 0.017255 | 515 | 515 |
| DRD3      | 0.120007 | 0.006398 | 0.017162 | 515 | 37  |
| HHIPL1    | 0.120026 | 0.00639  | 0.017144 | 515 | 515 |
| DGKZ      | 0.120043 | 0.006383 | 0.017126 | 515 | 515 |
| NXF3      | 0.120076 | 0.006368 | 0.017091 | 515 | 440 |
| ARC       | 0.120131 | 0.006344 | 0.017033 | 515 | 510 |
| ADAMTSL1  | 0.12017  | 0.006326 | 0.016991 | 515 | 515 |
| ELL2      | 0.120192 | 0.006317 | 0.016968 | 515 | 515 |
| CCNC      | 0.120199 | 0.006314 | 0.016964 | 515 | 515 |
| DUSP7     | 0.120293 | 0.006273 | 0.016856 | 515 | 515 |
| CDH6      | 0.120316 | 0.006263 | 0.016834 | 515 | 515 |
| FFAR2     | 0.120319 | 0.006261 | 0.016832 | 515 | 513 |
| RUNX1     | 0.120376 | 0.006237 | 0.016773 | 515 | 515 |
| EGLN3     | 0.120421 | 0.006217 | 0.016727 | 515 | 515 |
| SMG1      | 0.120422 | 0.006217 | 0.016727 | 515 | 515 |
| DCLRE1C   | 0.120466 | 0.006197 | 0.016682 | 515 | 515 |
| XPO6      | 0.12051  | 0.006179 | 0.016646 | 515 | 515 |
| HOXA6     | 0.120519 | 0.006175 | 0.016638 | 515 | 488 |
| RAB4B     | 0.120534 | 0.006169 | 0.016626 | 515 | 515 |
| CDC42EP1  | 0.120548 | 0.006162 | 0.016611 | 515 | 515 |
| PRDM5     | 0.120564 | 0.006156 | 0.016595 | 515 | 514 |
| HTR7P1    | 0.12058  | 0.006148 | 0.016579 | 515 | 515 |
| CYP3A7    | 0.120601 | 0.006139 | 0.016559 | 515 | 395 |
| RASA1     | 0.120669 | 0.006111 | 0.016492 | 515 | 515 |
| PHACTR1   | 0.12067  | 0.00611  | 0.016492 | 515 | 515 |

|           |          |          |          |     |     |
|-----------|----------|----------|----------|-----|-----|
| C7orf64   | 0.120696 | 0.006099 | 0.016467 | 515 | 515 |
| A4GNT     | 0.120697 | 0.006099 | 0.016467 | 515 | 409 |
| LOC100129 | 0.120792 | 0.006059 | 0.016371 | 515 | 504 |
| HAUS1     | 0.12081  | 0.006051 | 0.016357 | 515 | 515 |
| INPP4B    | 0.120825 | 0.006045 | 0.016342 | 515 | 515 |
| PID1      | 0.120826 | 0.006044 | 0.016342 | 515 | 515 |
| LOC572558 | 0.120827 | 0.006044 | 0.016342 | 515 | 265 |
| EHBP1L1   | 0.120832 | 0.006041 | 0.01634  | 515 | 515 |
| C9orf25   | 0.120834 | 0.006041 | 0.01634  | 515 | 515 |
| UBR7      | 0.120841 | 0.006038 | 0.016334 | 515 | 515 |
| CNGA4     | 0.120878 | 0.006022 | 0.016299 | 515 | 493 |
| F11       | 0.121011 | 0.005966 | 0.016168 | 515 | 419 |
| PRKCA     | 0.121059 | 0.005947 | 0.016121 | 515 | 515 |
| NPR1      | 0.121066 | 0.005944 | 0.016115 | 515 | 515 |
| UGT3A2    | 0.121116 | 0.005923 | 0.01607  | 515 | 429 |
| TGFBR1    | 0.121154 | 0.005907 | 0.01603  | 515 | 515 |
| TMED7-TIC | 0.121185 | 0.005894 | 0.015997 | 515 | 504 |
| NCRNA0016 | 0.121189 | 0.005893 | 0.015994 | 515 | 140 |
| OR2C1     | 0.121209 | 0.005885 | 0.015975 | 515 | 255 |
| SHPRH     | 0.121219 | 0.00588  | 0.015965 | 515 | 515 |
| KPNA4     | 0.121224 | 0.005878 | 0.015962 | 515 | 515 |
| LOC646999 | 0.121268 | 0.00586  | 0.01592  | 515 | 511 |
| PLG       | 0.121283 | 0.005854 | 0.015904 | 515 | 128 |
| MICA      | 0.121289 | 0.005852 | 0.015901 | 515 | 515 |
| STAG3L1   | 0.121355 | 0.005825 | 0.015833 | 515 | 515 |
| LOC442421 | 0.121394 | 0.005809 | 0.015793 | 515 | 485 |
| NMNAT2    | 0.121421 | 0.005798 | 0.015772 | 515 | 514 |
| WDR53     | 0.12144  | 0.00579  | 0.015752 | 515 | 515 |
| ZNF737    | 0.121448 | 0.005787 | 0.015746 | 515 | 515 |
| C4orf26   | 0.121511 | 0.005761 | 0.015685 | 515 | 365 |
| LOC283314 | 0.12153  | 0.005754 | 0.015666 | 515 | 515 |
| CREM      | 0.121547 | 0.005747 | 0.015652 | 515 | 515 |
| VAT1      | 0.121625 | 0.005715 | 0.015573 | 515 | 515 |
| ZNF763    | 0.12163  | 0.005713 | 0.015569 | 515 | 515 |
| EFHB      | 0.121661 | 0.005701 | 0.015544 | 515 | 501 |
| PCDH12    | 0.121717 | 0.005679 | 0.015492 | 515 | 515 |
| ZNF389    | 0.121752 | 0.005665 | 0.015456 | 515 | 501 |
| TRIL      | 0.121765 | 0.00566  | 0.015446 | 515 | 515 |
| SACM1L    | 0.121767 | 0.005659 | 0.015445 | 515 | 515 |
| RNF138    | 0.121946 | 0.005588 | 0.015267 | 515 | 515 |
| FBX041    | 0.121953 | 0.005585 | 0.015262 | 515 | 515 |
| F2RL2     | 0.122006 | 0.005565 | 0.015218 | 515 | 512 |
| OR12D2    | 0.122042 | 0.00555  | 0.015185 | 515 | 36  |
| ST3GAL1   | 0.122075 | 0.005538 | 0.015156 | 515 | 515 |
| FAM154B   | 0.122096 | 0.00553  | 0.01514  | 515 | 511 |
| 8-Mar     | 0.122109 | 0.005524 | 0.015132 | 515 | 515 |
| NLGN3     | 0.12213  | 0.005516 | 0.015112 | 515 | 515 |
| BVES      | 0.122137 | 0.005513 | 0.015107 | 515 | 515 |
| CIB3      | 0.122198 | 0.00549  | 0.015048 | 515 | 148 |
| TEX12     | 0.122289 | 0.005455 | 0.014965 | 515 | 381 |
| KANK3     | 0.122292 | 0.005454 | 0.014963 | 515 | 515 |
| TNFRSF10A | 0.122294 | 0.005453 | 0.014963 | 515 | 515 |
| WDR11     | 0.122337 | 0.005436 | 0.014922 | 515 | 515 |
| C6        | 0.122367 | 0.005425 | 0.014892 | 515 | 491 |

|           |          |          |          |     |     |
|-----------|----------|----------|----------|-----|-----|
| PRIMA1    | 0.122439 | 0.005397 | 0.014827 | 515 | 469 |
| PJA2      | 0.122473 | 0.005384 | 0.014802 | 515 | 515 |
| LOC148696 | 0.122514 | 0.005369 | 0.014764 | 515 | 445 |
| LOC729991 | 0.122521 | 0.005366 | 0.014758 | 515 | 512 |
| MUL1      | 0.122537 | 0.00536  | 0.014744 | 515 | 515 |
| C19orf34  | 0.12254  | 0.005359 | 0.014742 | 515 | 317 |
| RPS6KA4   | 0.12259  | 0.00534  | 0.014696 | 515 | 515 |
| CCDC48    | 0.12261  | 0.005333 | 0.014679 | 515 | 515 |
| CNOT8     | 0.122626 | 0.005327 | 0.014667 | 515 | 515 |
| IGLL1     | 0.122665 | 0.005312 | 0.014629 | 515 | 205 |
| PPP2R5B   | 0.122704 | 0.005297 | 0.014592 | 515 | 515 |
| CMTM5     | 0.122763 | 0.005275 | 0.014541 | 515 | 332 |
| LRRC34    | 0.122781 | 0.005268 | 0.014525 | 515 | 515 |
| RAB7A     | 0.122935 | 0.005211 | 0.014384 | 515 | 515 |
| SEC23A    | 0.122944 | 0.005208 | 0.014377 | 515 | 515 |
| ZMAT1     | 0.12297  | 0.005199 | 0.014354 | 515 | 515 |
| CLSTN2    | 0.123025 | 0.005178 | 0.014302 | 515 | 513 |
| TP73      | 0.123052 | 0.005168 | 0.014277 | 515 | 514 |
| ZNF800    | 0.123115 | 0.005145 | 0.014217 | 515 | 515 |
| ALS2CR8   | 0.123201 | 0.005114 | 0.014143 | 515 | 515 |
| IFITM2    | 0.123218 | 0.005108 | 0.014129 | 515 | 515 |
| OR2D2     | 0.123224 | 0.005106 | 0.014125 | 515 | 44  |
| MRPL54    | 0.123225 | 0.005105 | 0.014125 | 515 | 515 |
| MYOC      | 0.123229 | 0.005104 | 0.014124 | 515 | 398 |
| FM06P     | 0.12324  | 0.0051   | 0.014115 | 515 | 360 |
| PIF1      | 0.123265 | 0.005091 | 0.014094 | 515 | 515 |
| DHDH      | 0.123294 | 0.005081 | 0.014069 | 515 | 512 |
| SLC26A10  | 0.123345 | 0.005062 | 0.014022 | 515 | 506 |
| FOSL1     | 0.12343  | 0.005032 | 0.013943 | 515 | 515 |
| RGS5      | 0.123435 | 0.00503  | 0.013941 | 515 | 515 |
| TRPV6     | 0.123444 | 0.005026 | 0.013933 | 515 | 478 |
| VRK3      | 0.123471 | 0.005017 | 0.013909 | 515 | 515 |
| C2orf80   | 0.12351  | 0.005003 | 0.013874 | 515 | 122 |
| C9orf80   | 0.123543 | 0.004991 | 0.013847 | 515 | 515 |
| SLC1A4    | 0.123584 | 0.004977 | 0.01381  | 515 | 515 |
| NUBP1     | 0.123604 | 0.00497  | 0.013795 | 515 | 515 |
| CLDN14    | 0.123613 | 0.004966 | 0.013788 | 515 | 493 |
| LRRIQ1    | 0.123662 | 0.004949 | 0.013746 | 515 | 495 |
| ZNF714    | 0.123663 | 0.004949 | 0.013746 | 515 | 515 |
| LTK       | 0.123702 | 0.004935 | 0.013712 | 515 | 515 |
| LY6H      | 0.123712 | 0.004932 | 0.013705 | 515 | 503 |
| OR3A1     | 0.123734 | 0.004924 | 0.013685 | 515 | 112 |
| SLC30A7   | 0.123746 | 0.00492  | 0.013675 | 515 | 515 |
| VASN      | 0.123802 | 0.0049   | 0.013623 | 515 | 515 |
| GNG11     | 0.123843 | 0.004886 | 0.013585 | 515 | 515 |
| SDSL      | 0.12392  | 0.004859 | 0.013518 | 515 | 515 |
| FRMD5     | 0.123928 | 0.004856 | 0.013512 | 515 | 514 |
| SUB1      | 0.124006 | 0.004829 | 0.013448 | 515 | 515 |
| PDZD4     | 0.124009 | 0.004828 | 0.013447 | 515 | 515 |
| BLID      | 0.124016 | 0.004826 | 0.013443 | 515 | 121 |
| NPR3      | 0.124041 | 0.004817 | 0.01342  | 515 | 515 |
| GCGR      | 0.124061 | 0.00481  | 0.013405 | 515 | 324 |
| HOXD1     | 0.124069 | 0.004808 | 0.013399 | 515 | 515 |
| KIF5C     | 0.124072 | 0.004807 | 0.013399 | 515 | 515 |

|           |          |          |          |     |     |
|-----------|----------|----------|----------|-----|-----|
| FAM95B1   | 0.124162 | 0.004776 | 0.013321 | 515 | 512 |
| CNDP2     | 0.124227 | 0.004754 | 0.013263 | 515 | 515 |
| NPTX1     | 0.124274 | 0.004738 | 0.013228 | 515 | 515 |
| SPRR2A    | 0.124282 | 0.004735 | 0.013223 | 515 | 280 |
| TREX1     | 0.124285 | 0.004734 | 0.013222 | 515 | 515 |
| SGCB      | 0.124307 | 0.004727 | 0.013205 | 515 | 515 |
| LIG4      | 0.124355 | 0.004711 | 0.013161 | 515 | 515 |
| MYC       | 0.124384 | 0.004701 | 0.013139 | 515 | 515 |
| FLJ37307  | 0.124408 | 0.004693 | 0.013124 | 515 | 488 |
| ERI1      | 0.124448 | 0.004679 | 0.013091 | 515 | 515 |
| TGM1      | 0.124462 | 0.004675 | 0.01308  | 515 | 515 |
| HNRPLL    | 0.124463 | 0.004674 | 0.01308  | 515 | 515 |
| LOC641298 | 0.124479 | 0.004669 | 0.013067 | 515 | 514 |
| ATG16L2   | 0.124482 | 0.004668 | 0.013067 | 515 | 515 |
| SLC22A18A | 0.124496 | 0.004663 | 0.013056 | 515 | 514 |
| MUC16     | 0.124539 | 0.004649 | 0.01302  | 515 | 503 |
| KIAA1430  | 0.124569 | 0.004639 | 0.012998 | 515 | 515 |
| CCDC37    | 0.124598 | 0.004629 | 0.012976 | 515 | 411 |
| C21orf62  | 0.124625 | 0.004621 | 0.012957 | 515 | 403 |
| ZBED5     | 0.124674 | 0.004604 | 0.012914 | 515 | 515 |
| TGFA      | 0.12478  | 0.00457  | 0.012826 | 515 | 515 |
| VMO1      | 0.124783 | 0.004569 | 0.012825 | 515 | 515 |
| ARPC3     | 0.124878 | 0.004537 | 0.012739 | 515 | 515 |
| DDX43     | 0.12492  | 0.004524 | 0.012704 | 515 | 484 |
| LOC100128 | 0.125022 | 0.004491 | 0.012621 | 515 | 372 |
| WIPI1     | 0.125022 | 0.004491 | 0.012621 | 515 | 515 |
| LDLRAD3   | 0.125036 | 0.004486 | 0.012612 | 515 | 515 |
| ANXA2P2   | 0.1251   | 0.004466 | 0.012563 | 515 | 515 |
| PLD5      | 0.125116 | 0.00446  | 0.012555 | 515 | 481 |
| PDE6D     | 0.125144 | 0.004451 | 0.012534 | 515 | 515 |
| DNAJB1    | 0.125159 | 0.004447 | 0.012523 | 515 | 515 |
| ZNF575    | 0.125201 | 0.004433 | 0.01249  | 515 | 515 |
| KLHL34    | 0.125201 | 0.004433 | 0.01249  | 515 | 380 |
| HMMR      | 0.12523  | 0.004424 | 0.012469 | 515 | 515 |
| PTTG1     | 0.12527  | 0.004411 | 0.012435 | 515 | 515 |
| XIST      | 0.125309 | 0.004399 | 0.012407 | 515 | 470 |
| ANKRD36   | 0.125319 | 0.004396 | 0.012401 | 515 | 515 |
| TMCC2     | 0.125339 | 0.004389 | 0.012387 | 515 | 515 |
| RPS29     | 0.125373 | 0.004379 | 0.012359 | 515 | 515 |
| RAMP2     | 0.125384 | 0.004375 | 0.012351 | 515 | 515 |
| ZFP92     | 0.125416 | 0.004365 | 0.012326 | 515 | 460 |
| C3orf63   | 0.12546  | 0.004351 | 0.012292 | 515 | 515 |
| MRPS6     | 0.125518 | 0.004333 | 0.012242 | 515 | 515 |
| CTTNBP2NL | 0.125637 | 0.004296 | 0.012148 | 515 | 515 |
| FAM53B    | 0.125665 | 0.004288 | 0.012129 | 515 | 515 |
| FCHO2     | 0.125733 | 0.004267 | 0.012083 | 515 | 515 |
| TMX1      | 0.125778 | 0.004253 | 0.012045 | 515 | 515 |
| GPR21     | 0.125815 | 0.004241 | 0.012015 | 515 | 445 |
| GPCPD1    | 0.125833 | 0.004236 | 0.012    | 515 | 515 |
| ATP11B    | 0.12586  | 0.004228 | 0.011979 | 515 | 515 |
| GTF2H1    | 0.125907 | 0.004213 | 0.011946 | 515 | 515 |
| FLJ26850  | 0.125911 | 0.004212 | 0.011944 | 515 | 404 |
| ZNF35     | 0.125911 | 0.004212 | 0.011944 | 515 | 515 |
| MBOAT4    | 0.125951 | 0.0042   | 0.011914 | 515 | 498 |

|           |          |          |          |     |     |
|-----------|----------|----------|----------|-----|-----|
| SGMS1     | 0.125988 | 0.004189 | 0.011884 | 515 | 515 |
| BHLHE40   | 0.126001 | 0.004185 | 0.011874 | 515 | 515 |
| NCRNA0017 | 0.126021 | 0.004179 | 0.011859 | 515 | 494 |
| NDNL2     | 0.126027 | 0.004177 | 0.011855 | 515 | 515 |
| C7orf34   | 0.126041 | 0.004173 | 0.011845 | 515 | 180 |
| C2orf42   | 0.126048 | 0.00417  | 0.011841 | 515 | 515 |
| RAET1E    | 0.126069 | 0.004164 | 0.011825 | 515 | 506 |
| SLC1A7    | 0.126145 | 0.004141 | 0.011773 | 515 | 515 |
| SNURF     | 0.126287 | 0.004099 | 0.011662 | 515 | 493 |
| USF1      | 0.126303 | 0.004094 | 0.011651 | 515 | 515 |
| DUSP1     | 0.126403 | 0.004065 | 0.011572 | 515 | 515 |
| LAMB4     | 0.126421 | 0.004059 | 0.011559 | 515 | 465 |
| CLCA3P    | 0.126431 | 0.004056 | 0.011553 | 515 | 307 |
| CLCF1     | 0.126533 | 0.004026 | 0.011476 | 515 | 515 |
| SUPT4H1   | 0.126534 | 0.004026 | 0.011476 | 515 | 515 |
| SMPX      | 0.126581 | 0.004012 | 0.011441 | 515 | 380 |
| CXCR1     | 0.126582 | 0.004012 | 0.011441 | 515 | 501 |
| ZNF836    | 0.126616 | 0.004002 | 0.01142  | 515 | 515 |
| ACTN1     | 0.126659 | 0.00399  | 0.011386 | 515 | 515 |
| C6orf123  | 0.126691 | 0.003981 | 0.011366 | 515 | 509 |
| TTLL3     | 0.126735 | 0.003968 | 0.011333 | 515 | 515 |
| PDCD10    | 0.126782 | 0.003954 | 0.0113   | 515 | 515 |
| CISH      | 0.126787 | 0.003953 | 0.011297 | 515 | 515 |
| NCRNA0002 | 0.126813 | 0.003945 | 0.011279 | 515 | 107 |
| CPLX3     | 0.126821 | 0.003943 | 0.011274 | 515 | 311 |
| TMEM190   | 0.126827 | 0.003941 | 0.011271 | 515 | 447 |
| HPSE2     | 0.126921 | 0.003914 | 0.0112   | 515 | 403 |
| HCN2      | 0.126956 | 0.003905 | 0.011175 | 515 | 510 |
| WDR66     | 0.127041 | 0.003881 | 0.011109 | 515 | 515 |
| C20orf106 | 0.127073 | 0.003871 | 0.011085 | 515 | 376 |
| MYH8      | 0.127078 | 0.00387  | 0.011082 | 515 | 133 |
| LOC91450  | 0.127089 | 0.003867 | 0.011075 | 515 | 505 |
| FAM5C     | 0.12709  | 0.003867 | 0.011075 | 515 | 497 |
| PAK2      | 0.127098 | 0.003864 | 0.011071 | 515 | 515 |
| CXorf40A  | 0.127146 | 0.003851 | 0.011037 | 515 | 515 |
| RAB9A     | 0.127167 | 0.003845 | 0.011022 | 515 | 515 |
| RAB23     | 0.12718  | 0.003841 | 0.011013 | 515 | 515 |
| TUSC5     | 0.127189 | 0.003839 | 0.011007 | 515 | 292 |
| YAF2      | 0.127203 | 0.003835 | 0.010997 | 515 | 515 |
| RBM24     | 0.127315 | 0.003804 | 0.010917 | 515 | 504 |
| KCTD5     | 0.127331 | 0.003799 | 0.010909 | 515 | 515 |
| ZNF519    | 0.12735  | 0.003794 | 0.010897 | 515 | 515 |
| HSD17B3   | 0.127414 | 0.003776 | 0.010849 | 515 | 403 |
| AQP4      | 0.127479 | 0.003758 | 0.010801 | 515 | 509 |
| KCNJ15    | 0.127542 | 0.003741 | 0.010761 | 515 | 515 |
| ZNF20     | 0.127563 | 0.003735 | 0.010746 | 515 | 515 |
| TCF19     | 0.1276   | 0.003725 | 0.01072  | 515 | 515 |
| LOC151174 | 0.127601 | 0.003725 | 0.01072  | 515 | 499 |
| NLRP2     | 0.127601 | 0.003725 | 0.01072  | 515 | 514 |
| MPHOSPH9  | 0.127607 | 0.003723 | 0.010719 | 515 | 515 |
| ELMOD1    | 0.127671 | 0.003706 | 0.010672 | 515 | 474 |
| GJA1      | 0.127708 | 0.003696 | 0.010646 | 515 | 515 |
| MT1DP     | 0.127716 | 0.003694 | 0.010642 | 515 | 404 |
| ZNF346    | 0.127774 | 0.003678 | 0.010601 | 515 | 515 |

|           |          |          |          |     |     |
|-----------|----------|----------|----------|-----|-----|
| NFE2L2    | 0.127783 | 0.003676 | 0.010599 | 515 | 515 |
| SPSB4     | 0.127832 | 0.003663 | 0.010566 | 515 | 498 |
| FXVD2     | 0.127856 | 0.003656 | 0.010548 | 515 | 500 |
| ZNF92     | 0.12786  | 0.003655 | 0.010547 | 515 | 515 |
| FNDC3B    | 0.127908 | 0.003642 | 0.010513 | 515 | 515 |
| LOC401093 | 0.128002 | 0.003617 | 0.010444 | 515 | 515 |
| PNPLA8    | 0.128058 | 0.003602 | 0.010404 | 515 | 515 |
| ZNF765    | 0.128099 | 0.003592 | 0.010376 | 515 | 515 |
| PTPRT     | 0.128147 | 0.003579 | 0.010342 | 515 | 479 |
| SCN3A     | 0.128155 | 0.003577 | 0.010337 | 515 | 511 |
| C13orf16  | 0.128171 | 0.003573 | 0.010327 | 515 | 381 |
| MBOAT2    | 0.128267 | 0.003547 | 0.01026  | 515 | 515 |
| RNF38     | 0.128273 | 0.003546 | 0.010257 | 515 | 515 |
| UPK3B     | 0.128275 | 0.003545 | 0.010257 | 515 | 511 |
| SGK269    | 0.128307 | 0.003537 | 0.010235 | 515 | 515 |
| TRAM2     | 0.128312 | 0.003536 | 0.010232 | 515 | 515 |
| C6orf118  | 0.128322 | 0.003533 | 0.010226 | 515 | 407 |
| VWC2      | 0.128334 | 0.00353  | 0.01022  | 515 | 335 |
| OR2L1P    | 0.12836  | 0.003523 | 0.010202 | 515 | 51  |
| PTPN13    | 0.128445 | 0.003501 | 0.010146 | 515 | 515 |
| AMD1      | 0.128482 | 0.003492 | 0.010121 | 515 | 515 |
| C8orf34   | 0.128492 | 0.003489 | 0.010115 | 515 | 505 |
| ADRA1A    | 0.12851  | 0.003485 | 0.010104 | 515 | 341 |
| C1orf129  | 0.128542 | 0.003477 | 0.010084 | 515 | 348 |
| KIAA1539  | 0.128567 | 0.00347  | 0.01007  | 515 | 515 |
| ZNF334    | 0.128575 | 0.003468 | 0.010065 | 515 | 515 |
| MAMDC2    | 0.12861  | 0.003459 | 0.010041 | 515 | 514 |
| OR5B21    | 0.128656 | 0.003447 | 0.010011 | 515 | 60  |
| ATG5      | 0.128665 | 0.003445 | 0.010007 | 515 | 515 |
| ISG20     | 0.12871  | 0.003434 | 0.009976 | 515 | 515 |
| TMEM130   | 0.128769 | 0.003419 | 0.009936 | 515 | 513 |
| PRSS30P   | 0.128864 | 0.003395 | 0.009869 | 515 | 446 |
| ARNT2     | 0.128868 | 0.003394 | 0.009867 | 515 | 515 |
| C1orf63   | 0.128871 | 0.003393 | 0.009867 | 515 | 515 |
| AK3L1     | 0.128948 | 0.003374 | 0.009812 | 515 | 515 |
| ALG10     | 0.128958 | 0.003371 | 0.009808 | 515 | 515 |
| LOXHD1    | 0.128992 | 0.003363 | 0.009786 | 515 | 486 |
| PSMC2     | 0.129261 | 0.003297 | 0.009613 | 515 | 515 |
| MSX2      | 0.129262 | 0.003297 | 0.009613 | 515 | 512 |
| COL10A1   | 0.129276 | 0.003293 | 0.009606 | 515 | 515 |
| CYS1      | 0.129296 | 0.003288 | 0.009594 | 515 | 515 |
| GTF2E1    | 0.129313 | 0.003284 | 0.009583 | 515 | 515 |
| TMEM146   | 0.12932  | 0.003283 | 0.009581 | 515 | 346 |
| CLEC3B    | 0.129392 | 0.003265 | 0.009536 | 515 | 515 |
| RFX8      | 0.129439 | 0.003254 | 0.009507 | 515 | 483 |
| TTL11     | 0.129487 | 0.003242 | 0.009476 | 515 | 515 |
| DPEP1     | 0.129592 | 0.003217 | 0.009412 | 515 | 511 |
| GBA3      | 0.1296   | 0.003215 | 0.009408 | 515 | 404 |
| DEFB4A    | 0.129603 | 0.003214 | 0.009407 | 515 | 250 |
| C12orf60  | 0.129635 | 0.003207 | 0.009388 | 515 | 515 |
| MEGF6     | 0.129654 | 0.003202 | 0.009377 | 515 | 515 |
| SLC25A25  | 0.129655 | 0.003202 | 0.009377 | 515 | 515 |
| TSPAN31   | 0.129695 | 0.003193 | 0.009353 | 515 | 515 |
| SORBS1    | 0.129714 | 0.003188 | 0.009341 | 515 | 515 |

|           |          |          |          |     |     |
|-----------|----------|----------|----------|-----|-----|
| S1PR5     | 0.129717 | 0.003187 | 0.00934  | 515 | 515 |
| TNFRSF11E | 0.129795 | 0.003169 | 0.009295 | 515 | 515 |
| FAM96A    | 0.129825 | 0.003162 | 0.009277 | 515 | 515 |
| PTPRB     | 0.129899 | 0.003145 | 0.009228 | 515 | 515 |
| ANKAR     | 0.129912 | 0.003142 | 0.009221 | 515 | 515 |
| CALCOCO2  | 0.130013 | 0.003118 | 0.009163 | 515 | 515 |
| FAM151B   | 0.130053 | 0.003109 | 0.009138 | 515 | 515 |
| METTL14   | 0.130057 | 0.003108 | 0.009136 | 515 | 515 |
| SRGAP2    | 0.130079 | 0.003103 | 0.009124 | 515 | 515 |
| ZNF826    | 0.130185 | 0.003079 | 0.00906  | 515 | 514 |
| TFEB      | 0.130197 | 0.003076 | 0.009053 | 515 | 515 |
| SFRS5     | 0.130207 | 0.003073 | 0.009048 | 515 | 515 |
| ZDHHC15   | 0.13032  | 0.003048 | 0.008978 | 515 | 515 |
| KIAA1908  | 0.130333 | 0.003045 | 0.008971 | 515 | 515 |
| FBXL4     | 0.130375 | 0.003035 | 0.008945 | 515 | 515 |
| REEP2     | 0.130422 | 0.003025 | 0.008918 | 515 | 514 |
| S100A9    | 0.130428 | 0.003023 | 0.008915 | 515 | 515 |
| RQCD1     | 0.130436 | 0.003021 | 0.008911 | 515 | 515 |
| MAP1A     | 0.130444 | 0.00302  | 0.008908 | 515 | 515 |
| FAR1      | 0.130479 | 0.003012 | 0.008887 | 515 | 515 |
| EPHA10    | 0.130499 | 0.003007 | 0.008875 | 515 | 514 |
| MAP1LC3B2 | 0.130501 | 0.003007 | 0.008874 | 515 | 515 |
| PLXNA4    | 0.130504 | 0.003006 | 0.008874 | 515 | 515 |
| CTBS      | 0.130622 | 0.00298  | 0.008803 | 515 | 515 |
| QPCT      | 0.130679 | 0.002967 | 0.008767 | 515 | 515 |
| SSC5D     | 0.130766 | 0.002948 | 0.008714 | 515 | 515 |
| GPR146    | 0.130769 | 0.002947 | 0.008713 | 515 | 515 |
| ZNF169    | 0.130775 | 0.002946 | 0.00871  | 515 | 515 |
| TCEAL1    | 0.130778 | 0.002945 | 0.00871  | 515 | 515 |
| HBA2      | 0.131003 | 0.002896 | 0.008579 | 515 | 514 |
| GRM5      | 0.131021 | 0.002892 | 0.008568 | 515 | 488 |
| MARVELD1  | 0.131105 | 0.002874 | 0.008522 | 515 | 515 |
| ZNF208    | 0.131114 | 0.002872 | 0.008518 | 515 | 514 |
| TMOD4     | 0.131165 | 0.002861 | 0.00849  | 515 | 421 |
| RUNDC3B   | 0.131176 | 0.002859 | 0.008485 | 515 | 512 |
| HAO2      | 0.131209 | 0.002852 | 0.008465 | 515 | 165 |
| FAM134B   | 0.131231 | 0.002847 | 0.008453 | 515 | 515 |
| SNAPC1    | 0.131268 | 0.002839 | 0.008433 | 515 | 515 |
| LOC387647 | 0.131297 | 0.002833 | 0.008418 | 515 | 515 |
| COX4I2    | 0.131299 | 0.002833 | 0.008418 | 515 | 515 |
| KLF9      | 0.131313 | 0.00283  | 0.008411 | 515 | 515 |
| RHO       | 0.131335 | 0.002825 | 0.008401 | 515 | 212 |
| ITIH4     | 0.131336 | 0.002825 | 0.008401 | 515 | 515 |
| MMP1      | 0.131348 | 0.002822 | 0.008397 | 515 | 515 |
| TBC1D15   | 0.131348 | 0.002822 | 0.008397 | 515 | 515 |
| TTC14     | 0.131379 | 0.002816 | 0.008383 | 515 | 515 |
| NCRNA0003 | 0.131406 | 0.00281  | 0.008367 | 515 | 136 |
| C6orf192  | 0.131456 | 0.002799 | 0.008339 | 515 | 515 |
| ARMC4     | 0.13148  | 0.002794 | 0.008325 | 515 | 497 |
| ZNF235    | 0.131483 | 0.002794 | 0.008325 | 515 | 515 |
| RNF34     | 0.13149  | 0.002792 | 0.008323 | 515 | 515 |
| ANGPT4    | 0.131538 | 0.002782 | 0.008296 | 515 | 363 |
| XIRP2     | 0.131565 | 0.002777 | 0.008282 | 515 | 250 |
| CCDC78    | 0.131599 | 0.00277  | 0.008265 | 515 | 514 |



|          |          |          |          |     |     |
|----------|----------|----------|----------|-----|-----|
| PSMA2    | 0.131606 | 0.002768 | 0.008261 | 515 | 515 |
| KIAA0087 | 0.13161  | 0.002767 | 0.00826  | 515 | 363 |
| C3orf50  | 0.131647 | 0.00276  | 0.008241 | 515 | 272 |
| SLC38A1  | 0.131712 | 0.002746 | 0.008206 | 515 | 515 |
| SNX14    | 0.131717 | 0.002745 | 0.008204 | 515 | 515 |
| CNN1     | 0.131723 | 0.002744 | 0.008201 | 515 | 515 |
| SPINK13  | 0.131734 | 0.002742 | 0.008196 | 515 | 390 |
| CHM      | 0.131756 | 0.002737 | 0.008186 | 515 | 515 |
| ZNF292   | 0.131781 | 0.002732 | 0.008174 | 515 | 515 |
| FSIP1    | 0.131807 | 0.002727 | 0.008161 | 515 | 509 |
| RAB14    | 0.131814 | 0.002725 | 0.008159 | 515 | 515 |
| RBM44    | 0.131819 | 0.002724 | 0.008157 | 515 | 508 |
| C1orf158 | 0.13183  | 0.002722 | 0.008152 | 515 | 373 |
| FOXQ1    | 0.131831 | 0.002722 | 0.008152 | 515 | 513 |
| HSD3B2   | 0.131861 | 0.002715 | 0.00814  | 515 | 261 |
| RINL     | 0.131883 | 0.002711 | 0.00813  | 515 | 515 |
| ATP13A4  | 0.13197  | 0.002693 | 0.008084 | 515 | 510 |
| LDB3     | 0.13199  | 0.002689 | 0.008076 | 515 | 514 |
| FAM118A  | 0.132019 | 0.002683 | 0.008062 | 515 | 515 |
| SAP30L   | 0.132031 | 0.002681 | 0.008056 | 515 | 515 |
| PSMB1    | 0.132087 | 0.00267  | 0.008024 | 515 | 515 |
| HOXA4    | 0.13209  | 0.002669 | 0.008024 | 515 | 515 |
| AGBL2    | 0.132145 | 0.002658 | 0.007996 | 515 | 512 |
| RBMXL1   | 0.132157 | 0.002656 | 0.007991 | 515 | 515 |
| P2RX6    | 0.132206 | 0.002646 | 0.007963 | 515 | 483 |
| GSDMB    | 0.132234 | 0.00264  | 0.007951 | 515 | 515 |
| SUMO3    | 0.13224  | 0.002639 | 0.007949 | 515 | 515 |
| PLIN3    | 0.132246 | 0.002638 | 0.007947 | 515 | 515 |
| CNKSR2   | 0.132252 | 0.002637 | 0.007944 | 515 | 484 |
| CAPS2    | 0.132264 | 0.002634 | 0.007938 | 515 | 515 |
| GPR112   | 0.1323   | 0.002627 | 0.00792  | 515 | 129 |
| VWF      | 0.132316 | 0.002624 | 0.007914 | 515 | 515 |
| ZNF181   | 0.13234  | 0.002619 | 0.007902 | 515 | 515 |
| ZNF14    | 0.132367 | 0.002614 | 0.007888 | 515 | 515 |
| UNC5B    | 0.132429 | 0.002602 | 0.007855 | 515 | 515 |
| IFFO2    | 0.132447 | 0.002598 | 0.007847 | 515 | 515 |
| CEACAM8  | 0.132519 | 0.002584 | 0.00781  | 515 | 340 |
| UTRN     | 0.132529 | 0.002582 | 0.007806 | 515 | 515 |
| PNMAL2   | 0.132642 | 0.00256  | 0.007742 | 515 | 514 |
| ZNF682   | 0.132681 | 0.002553 | 0.007724 | 515 | 515 |
| KCNAB1   | 0.132723 | 0.002544 | 0.007701 | 515 | 515 |
| ZNF385B  | 0.132777 | 0.002534 | 0.007675 | 515 | 513 |
| GPIHBP1  | 0.132792 | 0.002531 | 0.007668 | 515 | 515 |
| FAM163B  | 0.132906 | 0.002509 | 0.007608 | 515 | 227 |
| ID2B     | 0.132907 | 0.002509 | 0.007608 | 515 | 496 |
| OR10J3   | 0.132927 | 0.002505 | 0.007599 | 515 | 31  |
| CNKSR3   | 0.132935 | 0.002504 | 0.007596 | 515 | 515 |
| CAMP     | 0.132936 | 0.002504 | 0.007596 | 515 | 467 |
| RNASE1   | 0.13294  | 0.002503 | 0.007595 | 515 | 515 |
| SYNRG    | 0.133009 | 0.00249  | 0.00756  | 515 | 515 |
| YIPF5    | 0.133104 | 0.002472 | 0.007509 | 515 | 515 |
| MYOM2    | 0.13312  | 0.002469 | 0.007501 | 515 | 514 |
| C15orf34 | 0.133179 | 0.002458 | 0.007471 | 515 | 515 |
| VNN3     | 0.133194 | 0.002455 | 0.007465 | 515 | 503 |

|          |          |          |          |     |     |
|----------|----------|----------|----------|-----|-----|
| G3BP1    | 0.133218 | 0.002451 | 0.007454 | 515 | 515 |
| LATS1    | 0.13327  | 0.002441 | 0.007432 | 515 | 515 |
| ZNF45    | 0.13331  | 0.002434 | 0.00741  | 515 | 515 |
| PTCD2    | 0.133336 | 0.002429 | 0.007397 | 515 | 515 |
| FAM118B  | 0.133428 | 0.002412 | 0.007352 | 515 | 515 |
| MLH1     | 0.133486 | 0.002401 | 0.007324 | 515 | 515 |
| CPEB4    | 0.133486 | 0.002401 | 0.007324 | 515 | 515 |
| ANKK1    | 0.133509 | 0.002397 | 0.007313 | 515 | 510 |
| TRIM10   | 0.133569 | 0.002386 | 0.007282 | 515 | 377 |
| IL13RA1  | 0.133573 | 0.002385 | 0.00728  | 515 | 515 |
| BRIP1    | 0.133585 | 0.002383 | 0.007275 | 515 | 515 |
| ARL15    | 0.133674 | 0.002367 | 0.007228 | 515 | 515 |
| PCF11    | 0.133727 | 0.002358 | 0.007202 | 515 | 515 |
| SYTL4    | 0.133732 | 0.002357 | 0.0072   | 515 | 515 |
| GIPC2    | 0.133786 | 0.002347 | 0.007173 | 515 | 514 |
| H2AFY2   | 0.133804 | 0.002344 | 0.007165 | 515 | 515 |
| FBXL12   | 0.133821 | 0.002341 | 0.007159 | 515 | 515 |
| DYNLRB2  | 0.133909 | 0.002325 | 0.007113 | 515 | 481 |
| TMEM27   | 0.133947 | 0.002318 | 0.007095 | 515 | 515 |
| NXPH3    | 0.13397  | 0.002314 | 0.007084 | 515 | 515 |
| ANTXR1   | 0.134013 | 0.002307 | 0.007063 | 515 | 515 |
| MAGEH1   | 0.134051 | 0.0023   | 0.007043 | 515 | 515 |
| USP51    | 0.134067 | 0.002297 | 0.007036 | 515 | 515 |
| ZCCHC10  | 0.134082 | 0.002295 | 0.007029 | 515 | 515 |
| ADRA2A   | 0.134086 | 0.002294 | 0.007028 | 515 | 515 |
| ZNF302   | 0.134229 | 0.002269 | 0.006956 | 515 | 515 |
| MITD1    | 0.134238 | 0.002267 | 0.006954 | 515 | 515 |
| GSG1L    | 0.134273 | 0.002261 | 0.006937 | 515 | 299 |
| PRKD2    | 0.134278 | 0.00226  | 0.006935 | 515 | 515 |
| C12orf72 | 0.134282 | 0.00226  | 0.006934 | 515 | 515 |
| ZNF585A  | 0.134291 | 0.002258 | 0.00693  | 515 | 515 |
| ZNF493   | 0.134304 | 0.002256 | 0.006924 | 515 | 515 |
| ARG1     | 0.13434  | 0.00225  | 0.006908 | 515 | 307 |
| SP6      | 0.134405 | 0.002239 | 0.006875 | 515 | 515 |
| PGAM4    | 0.134413 | 0.002237 | 0.006872 | 515 | 515 |
| PLXNA1   | 0.134421 | 0.002236 | 0.006869 | 515 | 515 |
| ZNF701   | 0.134432 | 0.002234 | 0.006866 | 515 | 515 |
| RXRG     | 0.134454 | 0.00223  | 0.006857 | 515 | 473 |
| IRX2     | 0.134464 | 0.002229 | 0.006853 | 515 | 514 |
| PTPN18   | 0.134479 | 0.002226 | 0.006847 | 515 | 515 |
| PLEKHH2  | 0.134511 | 0.002221 | 0.006832 | 515 | 515 |
| FAM43B   | 0.134529 | 0.002217 | 0.006823 | 515 | 504 |
| KIAA1211 | 0.134529 | 0.002217 | 0.006823 | 515 | 515 |
| IMPA1    | 0.134576 | 0.002209 | 0.006802 | 515 | 515 |
| NRCAM    | 0.134605 | 0.002205 | 0.006788 | 515 | 515 |
| KLHDC1   | 0.134637 | 0.002199 | 0.006774 | 515 | 515 |
| ZNF619   | 0.134646 | 0.002198 | 0.00677  | 515 | 515 |
| C1orf59  | 0.134743 | 0.002181 | 0.006722 | 515 | 515 |
| SPATA22  | 0.134752 | 0.00218  | 0.00672  | 515 | 205 |
| FSCN1    | 0.134762 | 0.002178 | 0.006715 | 515 | 515 |
| CHRM4    | 0.134764 | 0.002178 | 0.006715 | 515 | 457 |
| ATP6V1A  | 0.134774 | 0.002176 | 0.006711 | 515 | 515 |
| NAP1L5   | 0.134828 | 0.002167 | 0.006685 | 515 | 515 |
| SLC47A1  | 0.134862 | 0.002162 | 0.006669 | 515 | 515 |

|          |          |          |          |     |     |
|----------|----------|----------|----------|-----|-----|
| CDK6     | 0.134926 | 0.002151 | 0.006637 | 515 | 515 |
| CDC27    | 0.134975 | 0.002143 | 0.006614 | 515 | 515 |
| GJB6     | 0.13499  | 0.00214  | 0.006609 | 515 | 492 |
| RFX7     | 0.135024 | 0.002135 | 0.006595 | 515 | 515 |
| LUZP1    | 0.135033 | 0.002133 | 0.006591 | 515 | 515 |
| ADAMTSL2 | 0.13505  | 0.002131 | 0.006584 | 515 | 515 |
| GATA6    | 0.135065 | 0.002128 | 0.006579 | 515 | 515 |
| ALKBH8   | 0.135074 | 0.002127 | 0.006575 | 515 | 515 |
| CEP97    | 0.135108 | 0.002121 | 0.006559 | 515 | 515 |
| PEAR1    | 0.135124 | 0.002118 | 0.006553 | 515 | 515 |
| FAM117A  | 0.135209 | 0.002105 | 0.006515 | 515 | 515 |
| MTMR9L   | 0.135222 | 0.002102 | 0.006509 | 515 | 515 |
| SGCE     | 0.135229 | 0.002101 | 0.006507 | 515 | 515 |
| VIP      | 0.135341 | 0.002083 | 0.006457 | 515 | 425 |
| VTN      | 0.135368 | 0.002079 | 0.006445 | 515 | 509 |
| USP20    | 0.135432 | 0.002069 | 0.006414 | 515 | 515 |
| RPA2     | 0.135441 | 0.002067 | 0.006411 | 515 | 515 |
| RPSAP52  | 0.135481 | 0.002061 | 0.006393 | 515 | 415 |
| C10orf11 | 0.135536 | 0.002052 | 0.006369 | 515 | 515 |
| TOR1AIP1 | 0.135559 | 0.002049 | 0.006358 | 515 | 515 |
| SENP5    | 0.135563 | 0.002048 | 0.006357 | 515 | 515 |
| DNAH12   | 0.135631 | 0.002037 | 0.006329 | 515 | 490 |
| PSMD10   | 0.135825 | 0.002007 | 0.006239 | 515 | 515 |
| TBC1D23  | 0.135954 | 0.001987 | 0.006182 | 515 | 515 |
| SAPS1    | 0.135996 | 0.001981 | 0.006164 | 515 | 515 |
| MRPS18C  | 0.135998 | 0.00198  | 0.006164 | 515 | 515 |
| ZNF256   | 0.136083 | 0.001967 | 0.006127 | 515 | 515 |
| AMY1A    | 0.136097 | 0.001965 | 0.006122 | 515 | 514 |
| FCGBP    | 0.136109 | 0.001963 | 0.006118 | 515 | 515 |
| C9orf84  | 0.136117 | 0.001962 | 0.006114 | 515 | 506 |
| PRICKLE2 | 0.136158 | 0.001956 | 0.006099 | 515 | 515 |
| CCDC8    | 0.136308 | 0.001933 | 0.006035 | 515 | 515 |
| LEAP2    | 0.136323 | 0.001931 | 0.00603  | 515 | 491 |
| ZNF347   | 0.136353 | 0.001927 | 0.006017 | 515 | 515 |
| ZNF586   | 0.136371 | 0.001924 | 0.00601  | 515 | 515 |
| CAPSL    | 0.13641  | 0.001918 | 0.005993 | 515 | 456 |
| FAM19A3  | 0.136428 | 0.001915 | 0.005986 | 515 | 361 |
| C2CD4C   | 0.136468 | 0.00191  | 0.00597  | 515 | 511 |
| ANKRD49  | 0.136507 | 0.001904 | 0.005954 | 515 | 515 |
| ZNF354B  | 0.1367   | 0.001875 | 0.00587  | 515 | 515 |
| CACNG3   | 0.136703 | 0.001875 | 0.005869 | 515 | 124 |
| ANXA3    | 0.136739 | 0.00187  | 0.005856 | 515 | 515 |
| SPTA1    | 0.136814 | 0.001859 | 0.005826 | 515 | 382 |
| ZRSR2    | 0.136818 | 0.001858 | 0.005825 | 515 | 515 |
| PROK2    | 0.136856 | 0.001853 | 0.005813 | 515 | 456 |
| CUBN     | 0.136858 | 0.001853 | 0.005813 | 515 | 515 |
| TTC1     | 0.136925 | 0.001843 | 0.005784 | 515 | 515 |
| SCN10A   | 0.136943 | 0.00184  | 0.005777 | 515 | 147 |
| VCAN     | 0.136953 | 0.001839 | 0.005775 | 515 | 515 |
| MYOCD    | 0.136963 | 0.001837 | 0.005771 | 515 | 503 |
| COCH     | 0.137007 | 0.001831 | 0.005752 | 515 | 514 |
| SLC17A8  | 0.137015 | 0.00183  | 0.00575  | 515 | 350 |
| PTPN2    | 0.137062 | 0.001823 | 0.00573  | 515 | 515 |
| C6orf201 | 0.137114 | 0.001816 | 0.005709 | 515 | 508 |

|           |          |          |          |     |     |
|-----------|----------|----------|----------|-----|-----|
| FAM3C     | 0.137196 | 0.001804 | 0.005677 | 515 | 515 |
| ADARB2    | 0.1372   | 0.001804 | 0.005676 | 515 | 424 |
| LHFPL4    | 0.137225 | 0.0018   | 0.005666 | 515 | 433 |
| HHATL     | 0.137244 | 0.001798 | 0.005658 | 515 | 311 |
| PRIC285   | 0.137244 | 0.001798 | 0.005658 | 515 | 515 |
| EEA1      | 0.137321 | 0.001787 | 0.005627 | 515 | 515 |
| UBLCP1    | 0.137357 | 0.001782 | 0.005614 | 515 | 515 |
| C13orf36  | 0.13737  | 0.00178  | 0.005609 | 515 | 362 |
| STEAP3    | 0.137382 | 0.001778 | 0.005605 | 515 | 515 |
| ZC3HAV1   | 0.137386 | 0.001778 | 0.005604 | 515 | 515 |
| LOC339788 | 0.137436 | 0.001771 | 0.005584 | 515 | 109 |
| CREB1     | 0.137468 | 0.001766 | 0.005574 | 515 | 515 |
| LOC100271 | 0.137512 | 0.00176  | 0.005556 | 515 | 515 |
| ZNF79     | 0.13757  | 0.001752 | 0.005534 | 515 | 515 |
| LIN7A     | 0.137613 | 0.001747 | 0.005518 | 515 | 513 |
| TFPI2     | 0.137648 | 0.001742 | 0.005504 | 515 | 515 |
| GPRIN2    | 0.137665 | 0.001739 | 0.005501 | 515 | 513 |
| GAB1      | 0.137701 | 0.001735 | 0.005488 | 515 | 515 |
| VSX2      | 0.137714 | 0.001733 | 0.005483 | 515 | 206 |
| COL6A4P2  | 0.137739 | 0.001729 | 0.005474 | 515 | 492 |
| PGK1      | 0.13774  | 0.001729 | 0.005474 | 515 | 515 |
| GFI1B     | 0.137805 | 0.00172  | 0.005448 | 515 | 407 |
| SPAG6     | 0.137819 | 0.001719 | 0.005443 | 515 | 485 |
| ACTG2     | 0.137858 | 0.001713 | 0.005428 | 515 | 515 |
| FERMT2    | 0.137929 | 0.001704 | 0.0054   | 515 | 515 |
| ARRDC3    | 0.137938 | 0.001703 | 0.005397 | 515 | 515 |
| FAM188A   | 0.137946 | 0.001702 | 0.005395 | 515 | 515 |
| LOC283999 | 0.13795  | 0.001701 | 0.005394 | 515 | 100 |
| FGF13     | 0.137984 | 0.001697 | 0.00538  | 515 | 515 |
| CLDN16    | 0.138031 | 0.00169  | 0.005362 | 515 | 448 |
| ZMAT3     | 0.138066 | 0.001686 | 0.00535  | 515 | 515 |
| OPRL1     | 0.138123 | 0.001678 | 0.005328 | 515 | 515 |
| RBM11     | 0.138133 | 0.001677 | 0.005325 | 515 | 513 |
| PRRG1     | 0.138185 | 0.00167  | 0.005306 | 515 | 515 |
| SLC6A4    | 0.138221 | 0.001665 | 0.005292 | 515 | 480 |
| RBM22     | 0.138239 | 0.001663 | 0.005285 | 515 | 515 |
| TCL1B     | 0.138255 | 0.001661 | 0.00528  | 515 | 197 |
| PIK3CA    | 0.138258 | 0.00166  | 0.005279 | 515 | 515 |
| TYK2      | 0.138269 | 0.001659 | 0.005275 | 515 | 515 |
| PZP       | 0.138339 | 0.00165  | 0.005249 | 515 | 452 |
| GABPA     | 0.13834  | 0.00165  | 0.005249 | 515 | 515 |
| TMEM233   | 0.138352 | 0.001648 | 0.005246 | 515 | 513 |
| GPX3      | 0.138445 | 0.001636 | 0.005213 | 515 | 515 |
| SOX17     | 0.138456 | 0.001635 | 0.00521  | 515 | 515 |
| USP12     | 0.138523 | 0.001626 | 0.005184 | 515 | 515 |
| EDN2      | 0.138571 | 0.00162  | 0.005166 | 515 | 511 |
| DLGAP3    | 0.138656 | 0.001609 | 0.005137 | 515 | 513 |
| SYTL3     | 0.138665 | 0.001608 | 0.005134 | 515 | 515 |
| NDST3     | 0.138688 | 0.001605 | 0.005126 | 515 | 412 |
| PALMD     | 0.138704 | 0.001603 | 0.005121 | 515 | 515 |
| LOC143188 | 0.13872  | 0.001601 | 0.005115 | 515 | 515 |
| C4orf47   | 0.138732 | 0.0016   | 0.005113 | 515 | 509 |
| BTAF1     | 0.138804 | 0.001591 | 0.005087 | 515 | 515 |
| PANK2     | 0.138808 | 0.00159  | 0.005086 | 515 | 515 |

|           |          |          |          |     |     |
|-----------|----------|----------|----------|-----|-----|
| TMEM64    | 0.138905 | 0.001578 | 0.005055 | 515 | 515 |
| ANKS1B    | 0.139038 | 0.001562 | 0.005005 | 515 | 495 |
| SERPINI1  | 0.139054 | 0.00156  | 0.005    | 515 | 515 |
| SEMA4A    | 0.139091 | 0.001555 | 0.004988 | 515 | 515 |
| CDKN1A    | 0.139096 | 0.001554 | 0.004986 | 515 | 515 |
| C19orf28  | 0.139117 | 0.001552 | 0.00498  | 515 | 515 |
| HOXA2     | 0.139122 | 0.001551 | 0.004979 | 515 | 514 |
| ARL5A     | 0.139151 | 0.001548 | 0.004969 | 515 | 515 |
| ECT2L     | 0.139166 | 0.001546 | 0.004964 | 515 | 515 |
| RNF128    | 0.139224 | 0.001539 | 0.004942 | 515 | 515 |
| ARHGAP29  | 0.139237 | 0.001537 | 0.004937 | 515 | 515 |
| C13orf33  | 0.139246 | 0.001536 | 0.004935 | 515 | 515 |
| CHD1      | 0.139254 | 0.001535 | 0.004933 | 515 | 515 |
| HRCT1     | 0.139255 | 0.001535 | 0.004933 | 515 | 513 |
| ZNF486    | 0.139335 | 0.001525 | 0.004905 | 515 | 513 |
| DISC1     | 0.139397 | 0.001518 | 0.004883 | 515 | 515 |
| AMDHD2    | 0.139437 | 0.001513 | 0.004868 | 515 | 515 |
| DENND2C   | 0.13951  | 0.001504 | 0.004843 | 515 | 515 |
| SNTB2     | 0.13957  | 0.001497 | 0.004822 | 515 | 515 |
| CAMK2N1   | 0.139805 | 0.00147  | 0.00474  | 515 | 515 |
| WDR63     | 0.139825 | 0.001467 | 0.004734 | 515 | 501 |
| GFOD1     | 0.139878 | 0.001461 | 0.004714 | 515 | 515 |
| SLCO1C1   | 0.139881 | 0.001461 | 0.004714 | 515 | 475 |
| ZDHHC19   | 0.139933 | 0.001455 | 0.004696 | 515 | 412 |
| MME       | 0.139992 | 0.001448 | 0.004676 | 515 | 514 |
| GAPVD1    | 0.140038 | 0.001443 | 0.00466  | 515 | 515 |
| LOC283856 | 0.140116 | 0.001434 | 0.004634 | 515 | 288 |
| MAS1      | 0.140121 | 0.001433 | 0.004633 | 515 | 65  |
| SDK2      | 0.14014  | 0.001431 | 0.004627 | 515 | 515 |
| ARID4A    | 0.140213 | 0.001423 | 0.004602 | 515 | 515 |
| C1orf92   | 0.140234 | 0.001421 | 0.004597 | 515 | 402 |
| DNAJA1    | 0.14031  | 0.001412 | 0.00457  | 515 | 515 |
| ELMO2     | 0.140434 | 0.001398 | 0.004527 | 515 | 515 |
| UHRF1BP1L | 0.140468 | 0.001394 | 0.004517 | 515 | 515 |
| SLC7A6    | 0.140478 | 0.001393 | 0.004514 | 515 | 515 |
| ZNF829    | 0.140488 | 0.001392 | 0.004511 | 515 | 512 |
| ZNF43     | 0.140494 | 0.001391 | 0.004509 | 515 | 515 |
| CDC25B    | 0.140538 | 0.001386 | 0.004495 | 515 | 515 |
| UVRAG     | 0.140568 | 0.001383 | 0.004485 | 515 | 515 |
| FAM78B    | 0.140588 | 0.001381 | 0.004479 | 515 | 513 |
| LOC342346 | 0.14063  | 0.001376 | 0.004465 | 515 | 466 |
| SLC22A10  | 0.140658 | 0.001373 | 0.004457 | 515 | 224 |
| STX17     | 0.140682 | 0.001371 | 0.004449 | 515 | 515 |
| LHX1      | 0.140735 | 0.001365 | 0.004432 | 515 | 194 |
| SLC25A45  | 0.140792 | 0.001359 | 0.004412 | 515 | 515 |
| TPST1     | 0.140793 | 0.001359 | 0.004412 | 515 | 515 |
| C2orf40   | 0.140832 | 0.001354 | 0.004401 | 515 | 479 |
| WDR44     | 0.140862 | 0.001351 | 0.004393 | 515 | 515 |
| PDE4DIP   | 0.140872 | 0.00135  | 0.004391 | 515 | 515 |
| WLS       | 0.140893 | 0.001348 | 0.004384 | 515 | 515 |
| PPIL3     | 0.140907 | 0.001346 | 0.00438  | 515 | 515 |
| SSBP2     | 0.140907 | 0.001346 | 0.00438  | 515 | 515 |
| IFT57     | 0.140947 | 0.001342 | 0.004369 | 515 | 515 |
| A2LD1     | 0.140995 | 0.001337 | 0.004355 | 515 | 515 |

|           |          |          |          |     |     |
|-----------|----------|----------|----------|-----|-----|
| ADAT2     | 0.141016 | 0.001335 | 0.004349 | 515 | 515 |
| ZNF317    | 0.141023 | 0.001334 | 0.004348 | 515 | 515 |
| FANCM     | 0.141041 | 0.001332 | 0.004342 | 515 | 515 |
| EDIL3     | 0.141104 | 0.001325 | 0.004322 | 515 | 515 |
| AGTR2     | 0.141161 | 0.001319 | 0.004305 | 515 | 459 |
| NR3C1     | 0.141163 | 0.001319 | 0.004305 | 515 | 515 |
| ERCC4     | 0.141118 | 0.001317 | 0.0043   | 515 | 515 |
| HABP4     | 0.141219 | 0.001313 | 0.004287 | 515 | 515 |
| MFAP5     | 0.141229 | 0.001312 | 0.004285 | 515 | 512 |
| VSNL1     | 0.141232 | 0.001312 | 0.004284 | 515 | 511 |
| TMEM171   | 0.14131  | 0.001304 | 0.00426  | 515 | 504 |
| C22orf25  | 0.141396 | 0.001295 | 0.004233 | 515 | 515 |
| DMKN      | 0.141413 | 0.001293 | 0.004228 | 515 | 514 |
| TCTE1     | 0.141418 | 0.001292 | 0.004228 | 515 | 425 |
| AWAT2     | 0.14152  | 0.001282 | 0.0042   | 515 | 324 |
| RGS8      | 0.141575 | 0.001276 | 0.004184 | 515 | 88  |
| SPP1      | 0.141577 | 0.001276 | 0.004184 | 515 | 515 |
| NUAK1     | 0.141637 | 0.00127  | 0.004166 | 515 | 515 |
| COMMD3    | 0.141679 | 0.001266 | 0.004154 | 515 | 515 |
| PRRX2     | 0.141683 | 0.001265 | 0.004154 | 515 | 514 |
| CDC42     | 0.141689 | 0.001265 | 0.004152 | 515 | 515 |
| KIAA1529  | 0.141719 | 0.001262 | 0.004143 | 515 | 515 |
| ATF7IP    | 0.141728 | 0.001261 | 0.004141 | 515 | 515 |
| RAB20     | 0.141752 | 0.001258 | 0.004135 | 515 | 515 |
| ITGB6     | 0.141759 | 0.001257 | 0.004133 | 515 | 515 |
| GNAI3     | 0.141776 | 0.001256 | 0.004128 | 515 | 515 |
| GSN       | 0.141895 | 0.001244 | 0.00409  | 515 | 515 |
| LOC100287 | 0.14196  | 0.001237 | 0.00407  | 515 | 348 |
| EEPD1     | 0.141969 | 0.001236 | 0.004068 | 515 | 515 |
| ITGB8     | 0.142009 | 0.001233 | 0.004057 | 515 | 515 |
| HES2      | 0.142023 | 0.001231 | 0.004052 | 515 | 514 |
| TRIB2     | 0.142033 | 0.00123  | 0.00405  | 515 | 515 |
| PPM1J     | 0.142051 | 0.001228 | 0.004046 | 515 | 515 |
| STRA6     | 0.142055 | 0.001228 | 0.004045 | 515 | 514 |
| MMAA      | 0.142072 | 0.001226 | 0.00404  | 515 | 515 |
| SOCS4     | 0.142094 | 0.001224 | 0.004034 | 515 | 515 |
| ZNF568    | 0.14211  | 0.001223 | 0.00403  | 515 | 515 |
| CDC26     | 0.142129 | 0.001221 | 0.004025 | 515 | 515 |
| MACROD2   | 0.142167 | 0.001217 | 0.004014 | 515 | 515 |
| PPP3R2    | 0.142171 | 0.001217 | 0.004013 | 515 | 146 |
| EML4      | 0.142172 | 0.001216 | 0.004013 | 515 | 515 |
| NPFFR1    | 0.142206 | 0.001213 | 0.004004 | 515 | 358 |
| ZNF525    | 0.142209 | 0.001213 | 0.004004 | 515 | 515 |
| CCDC13    | 0.142227 | 0.001211 | 0.004    | 515 | 513 |
| LGI3      | 0.142278 | 0.001206 | 0.003984 | 515 | 486 |
| XAGE1D    | 0.142286 | 0.001205 | 0.003983 | 515 | 501 |
| LOC641367 | 0.142304 | 0.001204 | 0.003977 | 515 | 514 |
| UTF1      | 0.142368 | 0.001197 | 0.003958 | 515 | 249 |
| MLC1      | 0.142527 | 0.001182 | 0.003909 | 515 | 511 |
| CCM2      | 0.142586 | 0.001176 | 0.003891 | 515 | 515 |
| CFI       | 0.142639 | 0.001171 | 0.003876 | 515 | 515 |
| FAM150B   | 0.142666 | 0.001169 | 0.003869 | 515 | 497 |
| TMEM204   | 0.142697 | 0.001166 | 0.00386  | 515 | 515 |
| C21orf34  | 0.142766 | 0.001159 | 0.00384  | 515 | 509 |

|           |          |          |          |     |     |
|-----------|----------|----------|----------|-----|-----|
| TCEAL2    | 0.142778 | 0.001158 | 0.003837 | 515 | 507 |
| ABCC6P1   | 0.142901 | 0.001147 | 0.003801 | 515 | 507 |
| SELK      | 0.142908 | 0.001146 | 0.0038   | 515 | 515 |
| FAM66C    | 0.142912 | 0.001146 | 0.003799 | 515 | 514 |
| SLC46A3   | 0.142913 | 0.001146 | 0.003799 | 515 | 515 |
| FBXL13    | 0.143067 | 0.001132 | 0.003755 | 515 | 511 |
| NEDD1     | 0.143087 | 0.00113  | 0.003751 | 515 | 515 |
| DACT3     | 0.143102 | 0.001128 | 0.003747 | 515 | 515 |
| PTEN      | 0.143116 | 0.001127 | 0.003743 | 515 | 515 |
| FRRS1     | 0.143166 | 0.001123 | 0.00373  | 515 | 515 |
| VASP      | 0.143202 | 0.001119 | 0.003721 | 515 | 515 |
| C4orf27   | 0.143234 | 0.001116 | 0.003712 | 515 | 515 |
| TBPL1     | 0.143262 | 0.001114 | 0.003704 | 515 | 515 |
| C4orf33   | 0.143416 | 0.0011   | 0.003662 | 515 | 515 |
| DNAJB4    | 0.143465 | 0.001096 | 0.003651 | 515 | 515 |
| POT1      | 0.143534 | 0.00109  | 0.003633 | 515 | 515 |
| TFPI      | 0.143568 | 0.001087 | 0.003624 | 515 | 515 |
| BCL2L1    | 0.143608 | 0.001083 | 0.003613 | 515 | 515 |
| IER5      | 0.143662 | 0.001078 | 0.003598 | 515 | 515 |
| HMGB2     | 0.143825 | 0.001064 | 0.003555 | 515 | 515 |
| NFIL3     | 0.143851 | 0.001062 | 0.003549 | 515 | 515 |
| SMAD7     | 0.143881 | 0.001059 | 0.003542 | 515 | 515 |
| DNM1      | 0.143948 | 0.001053 | 0.003523 | 515 | 515 |
| MGC21881  | 0.144017 | 0.001048 | 0.003504 | 515 | 515 |
| RAB27B    | 0.144026 | 0.001047 | 0.003503 | 515 | 515 |
| SLFN13    | 0.14403  | 0.001046 | 0.003502 | 515 | 515 |
| PGM2      | 0.144045 | 0.001045 | 0.003499 | 515 | 515 |
| RBM18     | 0.144071 | 0.001043 | 0.003492 | 515 | 515 |
| MFI2      | 0.14408  | 0.001042 | 0.00349  | 515 | 515 |
| MAP6      | 0.144085 | 0.001042 | 0.003489 | 515 | 515 |
| RAB5C     | 0.144176 | 0.001034 | 0.003465 | 515 | 515 |
| LOC339290 | 0.144245 | 0.001028 | 0.003448 | 515 | 515 |
| GRM8      | 0.144257 | 0.001027 | 0.003445 | 515 | 499 |
| PAQR8     | 0.144284 | 0.001025 | 0.003439 | 515 | 515 |
| PDE6B     | 0.144289 | 0.001025 | 0.003438 | 515 | 515 |
| ACHE      | 0.14437  | 0.001018 | 0.003418 | 515 | 515 |
| C9orf24   | 0.144396 | 0.001016 | 0.003411 | 515 | 509 |
| DCTN3     | 0.144428 | 0.001013 | 0.003403 | 515 | 515 |
| FOLR3     | 0.144478 | 0.001009 | 0.003392 | 515 | 423 |
| C1orf87   | 0.14456  | 0.001002 | 0.00337  | 515 | 416 |
| RNFT1     | 0.14461  | 0.000998 | 0.003357 | 515 | 515 |
| ARHGAP24  | 0.144734 | 0.000988 | 0.003326 | 515 | 515 |
| CMTM2     | 0.144813 | 0.000982 | 0.003307 | 515 | 504 |
| TRIM47    | 0.144835 | 0.00098  | 0.003302 | 515 | 515 |
| CAV2      | 0.144846 | 0.000979 | 0.0033   | 515 | 515 |
| TTC29     | 0.144982 | 0.000968 | 0.003265 | 515 | 393 |
| PHTF1     | 0.145022 | 0.000965 | 0.003255 | 515 | 515 |
| SSR3      | 0.145167 | 0.000954 | 0.00322  | 515 | 515 |
| TTC18     | 0.145174 | 0.000953 | 0.003219 | 515 | 515 |
| GALNTL4   | 0.1452   | 0.000951 | 0.003214 | 515 | 515 |
| KCNA1     | 0.145294 | 0.000944 | 0.00319  | 515 | 322 |
| PDLIM7    | 0.145336 | 0.00094  | 0.00318  | 515 | 515 |
| IL6ST     | 0.145365 | 0.000938 | 0.003173 | 515 | 515 |
| ABCD4     | 0.145374 | 0.000937 | 0.003171 | 515 | 515 |

|           |          |          |          |     |     |
|-----------|----------|----------|----------|-----|-----|
| ASB13     | 0.145395 | 0.000936 | 0.003167 | 515 | 515 |
| MCM5      | 0.145455 | 0.000931 | 0.003153 | 515 | 515 |
| ATR       | 0.145472 | 0.00093  | 0.003149 | 515 | 515 |
| PTPRD     | 0.145535 | 0.000925 | 0.003135 | 515 | 515 |
| C7orf72   | 0.145549 | 0.000924 | 0.003132 | 515 | 20  |
| TNFSF9    | 0.145631 | 0.000918 | 0.003114 | 515 | 515 |
| C10orf78  | 0.145694 | 0.000913 | 0.003101 | 515 | 515 |
| PRKAR2B   | 0.145766 | 0.000908 | 0.003086 | 515 | 515 |
| PTPRG     | 0.145841 | 0.000902 | 0.003068 | 515 | 515 |
| AQP8      | 0.145887 | 0.000899 | 0.003057 | 515 | 335 |
| CST1      | 0.145917 | 0.000897 | 0.00305  | 515 | 500 |
| TRPV5     | 0.145917 | 0.000897 | 0.00305  | 515 | 126 |
| WDR36     | 0.145922 | 0.000896 | 0.00305  | 515 | 515 |
| ARPC1B    | 0.14594  | 0.000895 | 0.003047 | 515 | 515 |
| THEG      | 0.145985 | 0.000891 | 0.003038 | 515 | 305 |
| SFRP4     | 0.14601  | 0.00089  | 0.003032 | 515 | 515 |
| ZNF527    | 0.146013 | 0.000889 | 0.003032 | 515 | 515 |
| DTNA      | 0.146034 | 0.000888 | 0.003027 | 515 | 515 |
| AKAP3     | 0.146081 | 0.000884 | 0.003017 | 515 | 514 |
| FAM126B   | 0.146172 | 0.000878 | 0.002997 | 515 | 515 |
| PDZD7     | 0.146236 | 0.000873 | 0.002983 | 515 | 511 |
| ZDBF2     | 0.146251 | 0.000872 | 0.00298  | 515 | 515 |
| ZFR2      | 0.146292 | 0.000869 | 0.002971 | 515 | 453 |
| ZNF354A   | 0.146294 | 0.000869 | 0.002971 | 515 | 515 |
| SPAG8     | 0.146308 | 0.000868 | 0.002968 | 515 | 512 |
| SERPIND1  | 0.14631  | 0.000868 | 0.002968 | 515 | 504 |
| PREX2     | 0.146312 | 0.000868 | 0.002968 | 515 | 512 |
| METTL4    | 0.146319 | 0.000867 | 0.002967 | 515 | 515 |
| ZNF570    | 0.146367 | 0.000864 | 0.002957 | 515 | 515 |
| FLT4      | 0.146411 | 0.000861 | 0.002947 | 515 | 515 |
| HBBP1     | 0.146465 | 0.000857 | 0.002936 | 515 | 77  |
| C17orf62  | 0.146516 | 0.000853 | 0.002924 | 515 | 515 |
| TMLHE     | 0.14654  | 0.000852 | 0.00292  | 515 | 515 |
| TBCEL     | 0.146571 | 0.000849 | 0.002914 | 515 | 515 |
| C10orf28  | 0.146585 | 0.000848 | 0.002911 | 515 | 515 |
| C21orf49  | 0.146615 | 0.000846 | 0.002904 | 515 | 511 |
| AANAT     | 0.146622 | 0.000846 | 0.002903 | 515 | 333 |
| MREG      | 0.146626 | 0.000846 | 0.002903 | 515 | 515 |
| STK38L    | 0.146656 | 0.000843 | 0.002896 | 515 | 515 |
| TMEM212   | 0.146673 | 0.000842 | 0.002893 | 515 | 373 |
| IGFBP4    | 0.146684 | 0.000841 | 0.00289  | 515 | 515 |
| EDNRB     | 0.146732 | 0.000838 | 0.00288  | 515 | 515 |
| C11orf66  | 0.146812 | 0.000833 | 0.002864 | 515 | 513 |
| COPS4     | 0.146866 | 0.000829 | 0.002852 | 515 | 515 |
| C2orf27A  | 0.146867 | 0.000829 | 0.002852 | 515 | 515 |
| LOC401397 | 0.146962 | 0.000822 | 0.00283  | 515 | 515 |
| ORC3L     | 0.146963 | 0.000822 | 0.00283  | 515 | 515 |
| KLRA1     | 0.146965 | 0.000822 | 0.00283  | 515 | 515 |
| ROBO4     | 0.146967 | 0.000822 | 0.00283  | 515 | 515 |
| KIAA0226  | 0.147051 | 0.000816 | 0.002812 | 515 | 515 |
| CSDC2     | 0.147052 | 0.000816 | 0.002812 | 515 | 514 |
| LIPN      | 0.147059 | 0.000816 | 0.002811 | 515 | 270 |
| AIRE      | 0.147098 | 0.000813 | 0.002803 | 515 | 267 |
| TATDN2    | 0.147132 | 0.000811 | 0.002797 | 515 | 515 |



|           |          |          |          |     |     |
|-----------|----------|----------|----------|-----|-----|
| CNTN2     | 0.147183 | 0.000807 | 0.002787 | 515 | 396 |
| TMEM200B  | 0.14721  | 0.000806 | 0.002781 | 515 | 515 |
| MGC87042  | 0.147247 | 0.000803 | 0.002774 | 515 | 514 |
| CLK1      | 0.147299 | 0.0008   | 0.002763 | 515 | 515 |
| CROT      | 0.147315 | 0.000799 | 0.00276  | 515 | 515 |
| C6orf70   | 0.147336 | 0.000797 | 0.002755 | 515 | 515 |
| DAZAP2    | 0.147359 | 0.000796 | 0.00275  | 515 | 515 |
| C22orf9   | 0.147392 | 0.000793 | 0.002744 | 515 | 515 |
| SCTR      | 0.147404 | 0.000793 | 0.002742 | 515 | 500 |
| ETF1      | 0.147467 | 0.000788 | 0.00273  | 515 | 515 |
| ZNF597    | 0.147502 | 0.000786 | 0.002723 | 515 | 515 |
| ADC       | 0.14754  | 0.000784 | 0.002715 | 515 | 515 |
| CDKN2D    | 0.147629 | 0.000778 | 0.002696 | 515 | 515 |
| LOC84740  | 0.147651 | 0.000777 | 0.002692 | 515 | 515 |
| MYH3      | 0.147657 | 0.000776 | 0.002691 | 515 | 515 |
| ABI1      | 0.147682 | 0.000775 | 0.002686 | 515 | 515 |
| HTRA3     | 0.147719 | 0.000772 | 0.002678 | 515 | 515 |
| DNAI2     | 0.147745 | 0.00077  | 0.002673 | 515 | 429 |
| DIAPH1    | 0.147746 | 0.00077  | 0.002673 | 515 | 515 |
| DUSP18    | 0.147757 | 0.00077  | 0.002672 | 515 | 515 |
| PAPOLG    | 0.147784 | 0.000768 | 0.002667 | 515 | 515 |
| MICAL2    | 0.147811 | 0.000766 | 0.002662 | 515 | 515 |
| PPP2CA    | 0.147839 | 0.000764 | 0.002657 | 515 | 515 |
| SNX8      | 0.147892 | 0.000761 | 0.002646 | 515 | 515 |
| ZFYVE28   | 0.147895 | 0.000761 | 0.002646 | 515 | 515 |
| SCARA5    | 0.147906 | 0.00076  | 0.002644 | 515 | 506 |
| NOL8      | 0.147942 | 0.000758 | 0.002637 | 515 | 515 |
| RAB43     | 0.147947 | 0.000758 | 0.002636 | 515 | 515 |
| ETV6      | 0.147955 | 0.000757 | 0.002635 | 515 | 515 |
| FOSB      | 0.147968 | 0.000756 | 0.002633 | 515 | 515 |
| SENP7     | 0.148032 | 0.000752 | 0.002621 | 515 | 515 |
| PPEF2     | 0.148058 | 0.000751 | 0.002616 | 515 | 226 |
| PADI6     | 0.148095 | 0.000748 | 0.00261  | 515 | 111 |
| C3orf15   | 0.148097 | 0.000748 | 0.00261  | 515 | 511 |
| SLC8A3    | 0.148103 | 0.000748 | 0.002609 | 515 | 494 |
| KCNE1L    | 0.148128 | 0.000746 | 0.002605 | 515 | 495 |
| TUBA4B    | 0.148142 | 0.000745 | 0.002603 | 515 | 474 |
| VEGFC     | 0.14816  | 0.000744 | 0.0026   | 515 | 515 |
| C20orf46  | 0.148223 | 0.00074  | 0.002588 | 515 | 515 |
| LOC100129 | 0.148255 | 0.000738 | 0.002582 | 515 | 515 |
| KDM4C     | 0.148286 | 0.000736 | 0.002577 | 515 | 515 |
| ALS2CR12  | 0.148328 | 0.000734 | 0.00257  | 515 | 468 |
| ENOX2     | 0.148423 | 0.000728 | 0.002551 | 515 | 515 |
| PHC3      | 0.148485 | 0.000724 | 0.00254  | 515 | 515 |
| KLKB1     | 0.148547 | 0.00072  | 0.002528 | 515 | 498 |
| SNX17     | 0.1486   | 0.000717 | 0.002518 | 515 | 515 |
| PPP1R2P9  | 0.148611 | 0.000717 | 0.002517 | 515 | 94  |
| CA3       | 0.148628 | 0.000716 | 0.002514 | 515 | 514 |
| MCM9      | 0.14865  | 0.000714 | 0.00251  | 515 | 515 |
| ZNF569    | 0.148668 | 0.000713 | 0.002507 | 515 | 515 |
| UPRT      | 0.148674 | 0.000713 | 0.002506 | 515 | 515 |
| TYRP1     | 0.148729 | 0.00071  | 0.002497 | 515 | 509 |
| LOC441046 | 0.148753 | 0.000708 | 0.002492 | 515 | 510 |
| CALM1     | 0.148818 | 0.000704 | 0.00248  | 515 | 515 |

|           |          |          |          |     |     |
|-----------|----------|----------|----------|-----|-----|
| C22orf15  | 0.14884  | 0.000703 | 0.002476 | 515 | 498 |
| POP4      | 0.148884 | 0.0007   | 0.002467 | 515 | 515 |
| NCRNA0009 | 0.148888 | 0.0007   | 0.002467 | 515 | 513 |
| TMEM114   | 0.149004 | 0.000693 | 0.002445 | 515 | 202 |
| LMAN1L    | 0.149046 | 0.000691 | 0.002438 | 515 | 248 |
| DPYSL4    | 0.14917  | 0.000684 | 0.002413 | 515 | 513 |
| EFNB1     | 0.149214 | 0.000681 | 0.002405 | 515 | 515 |
| INSIG2    | 0.149267 | 0.000678 | 0.002396 | 515 | 515 |
| MGC27382  | 0.149316 | 0.000675 | 0.002386 | 515 | 365 |
| ZNF410    | 0.14947  | 0.000667 | 0.002357 | 515 | 515 |
| CCDC3     | 0.149541 | 0.000663 | 0.002345 | 515 | 515 |
| EFHA2     | 0.149554 | 0.000662 | 0.002344 | 515 | 515 |
| SMOC2     | 0.149665 | 0.000656 | 0.002323 | 515 | 515 |
| LOC388692 | 0.149684 | 0.000655 | 0.00232  | 515 | 515 |
| ARL6      | 0.149718 | 0.000653 | 0.002314 | 515 | 515 |
| NUDT2     | 0.149726 | 0.000652 | 0.002312 | 515 | 515 |
| CCDC65    | 0.149729 | 0.000652 | 0.002312 | 515 | 513 |
| ISY1      | 0.149732 | 0.000652 | 0.002312 | 515 | 515 |
| SPRR2C    | 0.149736 | 0.000652 | 0.002312 | 515 | 210 |
| ZNF167    | 0.149744 | 0.000652 | 0.002311 | 515 | 515 |
| LEPROTL1  | 0.14981  | 0.000648 | 0.0023   | 515 | 515 |
| USP18     | 0.149815 | 0.000648 | 0.0023   | 515 | 515 |
| LSM11     | 0.149839 | 0.000646 | 0.002295 | 515 | 515 |
| STARD3NL  | 0.149934 | 0.000641 | 0.002279 | 515 | 515 |
| BMP3      | 0.149969 | 0.000639 | 0.002272 | 515 | 514 |
| ZFP82     | 0.149976 | 0.000639 | 0.002271 | 515 | 515 |
| JKAMP     | 0.150052 | 0.000635 | 0.002258 | 515 | 515 |
| SACS      | 0.150057 | 0.000634 | 0.002258 | 515 | 515 |
| SLC5A4    | 0.150059 | 0.000634 | 0.002258 | 515 | 455 |
| EIF5      | 0.150074 | 0.000634 | 0.002255 | 515 | 515 |
| AP1B1     | 0.150114 | 0.000631 | 0.002248 | 515 | 515 |
| CDK5R1    | 0.150152 | 0.000629 | 0.002242 | 515 | 515 |
| HERPUD2   | 0.150154 | 0.000629 | 0.002242 | 515 | 515 |
| UTS2R     | 0.15019  | 0.000627 | 0.002236 | 515 | 275 |
| DI01      | 0.150436 | 0.000614 | 0.002193 | 515 | 500 |
| KCNB1     | 0.150441 | 0.000614 | 0.002193 | 515 | 427 |
| TCL6      | 0.15045  | 0.000614 | 0.002191 | 515 | 390 |
| IGF2BP2   | 0.150534 | 0.000609 | 0.002177 | 515 | 515 |
| CD248     | 0.150555 | 0.000608 | 0.002174 | 515 | 515 |
| PRMT6     | 0.150609 | 0.000606 | 0.002166 | 515 | 515 |
| FAM125B   | 0.150613 | 0.000605 | 0.002165 | 515 | 515 |
| LOC148824 | 0.150615 | 0.000605 | 0.002165 | 515 | 331 |
| C19orf71  | 0.150629 | 0.000604 | 0.002163 | 515 | 508 |
| LOC646498 | 0.150671 | 0.000602 | 0.002157 | 515 | 49  |
| TIMP4     | 0.15074  | 0.000599 | 0.002147 | 515 | 505 |
| NALCN     | 0.150794 | 0.000596 | 0.002138 | 515 | 514 |
| SRPX      | 0.15081  | 0.000595 | 0.002136 | 515 | 515 |
| SLC25A40  | 0.150899 | 0.000591 | 0.002121 | 515 | 515 |
| SH3GL3    | 0.151025 | 0.000584 | 0.002101 | 515 | 375 |
| CTDSP2    | 0.151106 | 0.00058  | 0.002089 | 515 | 515 |
| SEPT8     | 0.151137 | 0.000579 | 0.002084 | 515 | 515 |
| PURA      | 0.151159 | 0.000578 | 0.00208  | 515 | 515 |
| SLIT1     | 0.151224 | 0.000575 | 0.00207  | 515 | 515 |
| SNCG      | 0.151242 | 0.000574 | 0.002067 | 515 | 515 |

|           |          |          |          |     |     |
|-----------|----------|----------|----------|-----|-----|
| FRYL      | 0.15127  | 0.000572 | 0.002063 | 515 | 515 |
| CPXCR1    | 0.151281 | 0.000572 | 0.002062 | 515 | 185 |
| BIVM      | 0.151422 | 0.000565 | 0.002039 | 515 | 515 |
| LGI2      | 0.151441 | 0.000564 | 0.002037 | 515 | 515 |
| LY6E      | 0.151451 | 0.000564 | 0.002036 | 515 | 515 |
| ARSJ      | 0.151476 | 0.000562 | 0.002031 | 515 | 515 |
| KATNAL1   | 0.151529 | 0.00056  | 0.002023 | 515 | 515 |
| PRKACA    | 0.151543 | 0.000559 | 0.002021 | 515 | 515 |
| CALM3     | 0.151579 | 0.000558 | 0.002016 | 515 | 515 |
| KLHL9     | 0.151644 | 0.000554 | 0.002005 | 515 | 515 |
| FAM153C   | 0.15165  | 0.000554 | 0.002004 | 515 | 195 |
| WFDC13    | 0.15175  | 0.000549 | 0.001989 | 515 | 408 |
| C9orf11   | 0.151772 | 0.000548 | 0.001986 | 515 | 232 |
| ECM1      | 0.151777 | 0.000548 | 0.001985 | 515 | 515 |
| NUP62     | 0.151804 | 0.000547 | 0.001981 | 515 | 515 |
| ADD2      | 0.151819 | 0.000546 | 0.00198  | 515 | 512 |
| C6orf103  | 0.151852 | 0.000545 | 0.001975 | 515 | 384 |
| CLDN1     | 0.151903 | 0.000542 | 0.001967 | 515 | 515 |
| PER3      | 0.151916 | 0.000542 | 0.001965 | 515 | 515 |
| MAGEL2    | 0.151946 | 0.00054  | 0.001961 | 515 | 512 |
| C7orf65   | 0.151947 | 0.00054  | 0.001961 | 515 | 181 |
| HESX1     | 0.151958 | 0.00054  | 0.00196  | 515 | 514 |
| CHAT      | 0.151975 | 0.000539 | 0.001958 | 515 | 134 |
| ZNF506    | 0.152009 | 0.000537 | 0.001953 | 515 | 515 |
| USHBP1    | 0.152037 | 0.000536 | 0.001949 | 515 | 515 |
| CTRC      | 0.152059 | 0.000535 | 0.001946 | 515 | 239 |
| ZNF542    | 0.152149 | 0.000531 | 0.001932 | 515 | 515 |
| SLC35D2   | 0.152192 | 0.000529 | 0.001925 | 515 | 515 |
| C19orf76  | 0.152217 | 0.000528 | 0.001921 | 515 | 515 |
| DGKH      | 0.152267 | 0.000526 | 0.001914 | 515 | 515 |
| KIF19     | 0.152302 | 0.000524 | 0.001908 | 515 | 508 |
| NUP54     | 0.152312 | 0.000524 | 0.001907 | 515 | 515 |
| SLC25A28  | 0.152412 | 0.000519 | 0.001892 | 515 | 515 |
| GUSBP3    | 0.152597 | 0.000511 | 0.001863 | 515 | 515 |
| ZNF625    | 0.152782 | 0.000503 | 0.001835 | 515 | 513 |
| FBX017    | 0.152829 | 0.000501 | 0.001828 | 515 | 515 |
| KIR2DL1   | 0.152836 | 0.000501 | 0.001827 | 515 | 321 |
| CTGF      | 0.152913 | 0.000497 | 0.001816 | 515 | 515 |
| ZNF226    | 0.153046 | 0.000492 | 0.001798 | 515 | 515 |
| CD34      | 0.153092 | 0.00049  | 0.001792 | 515 | 515 |
| PPP1R2    | 0.153135 | 0.000488 | 0.001785 | 515 | 515 |
| LOC100286 | 0.153135 | 0.000488 | 0.001785 | 515 | 515 |
| ACSL5     | 0.153213 | 0.000485 | 0.001774 | 515 | 515 |
| CENPK     | 0.153216 | 0.000484 | 0.001774 | 515 | 515 |
| COL5A1    | 0.153286 | 0.000482 | 0.001764 | 515 | 515 |
| LAMB1     | 0.153316 | 0.00048  | 0.00176  | 515 | 515 |
| ADAM22    | 0.153365 | 0.000478 | 0.001753 | 515 | 510 |
| GPR17     | 0.153386 | 0.000477 | 0.00175  | 515 | 496 |
| LOC729467 | 0.153439 | 0.000475 | 0.001743 | 515 | 183 |
| EFEMP2    | 0.153516 | 0.000472 | 0.001733 | 515 | 515 |
| PI15      | 0.153543 | 0.000471 | 0.00173  | 515 | 515 |
| ZNF177    | 0.153556 | 0.00047  | 0.001728 | 515 | 515 |
| CD300LG   | 0.153583 | 0.000469 | 0.001725 | 515 | 433 |
| CCDC36    | 0.153606 | 0.000468 | 0.001722 | 515 | 508 |

|           |          |          |          |     |     |
|-----------|----------|----------|----------|-----|-----|
| TRAF6     | 0.153609 | 0.000468 | 0.001722 | 515 | 515 |
| CBLN4     | 0.153649 | 0.000467 | 0.001717 | 515 | 492 |
| LDOC1     | 0.153672 | 0.000466 | 0.001714 | 515 | 515 |
| SPIN2A    | 0.153734 | 0.000463 | 0.001705 | 515 | 453 |
| C21orf15  | 0.153782 | 0.000461 | 0.001698 | 515 | 457 |
| BPI       | 0.153912 | 0.000456 | 0.00168  | 515 | 385 |
| CCNYL1    | 0.153996 | 0.000453 | 0.001669 | 515 | 515 |
| RNASEH2B  | 0.154183 | 0.000446 | 0.001644 | 515 | 515 |
| GPR162    | 0.154235 | 0.000444 | 0.001637 | 515 | 515 |
| ARHGEF1   | 0.15431  | 0.000441 | 0.001626 | 515 | 515 |
| FGF14     | 0.15435  | 0.000439 | 0.001621 | 515 | 515 |
| TEX9      | 0.15447  | 0.000435 | 0.001606 | 515 | 515 |
| DAO       | 0.154493 | 0.000434 | 0.001603 | 515 | 266 |
| HCRTR2    | 0.154565 | 0.000431 | 0.001595 | 515 | 287 |
| FOXC1     | 0.154596 | 0.00043  | 0.001591 | 515 | 515 |
| KLHL2     | 0.154608 | 0.000429 | 0.00159  | 515 | 515 |
| C1orf187  | 0.154638 | 0.000428 | 0.001586 | 515 | 458 |
| ASCL4     | 0.154731 | 0.000425 | 0.001574 | 515 | 222 |
| FNIP1     | 0.154801 | 0.000422 | 0.001565 | 515 | 515 |
| AHNAK     | 0.154829 | 0.000421 | 0.001561 | 515 | 515 |
| ANKRD29   | 0.154871 | 0.00042  | 0.001556 | 515 | 514 |
| ELOVL7    | 0.154933 | 0.000417 | 0.001548 | 515 | 515 |
| RNF146    | 0.154937 | 0.000417 | 0.001547 | 515 | 515 |
| LOC645431 | 0.155048 | 0.000413 | 0.001534 | 515 | 515 |
| HERC1     | 0.155105 | 0.000411 | 0.001527 | 515 | 515 |
| SYT12     | 0.155149 | 0.00041  | 0.001521 | 515 | 515 |
| PPID      | 0.155194 | 0.000408 | 0.001516 | 515 | 515 |
| WDR38     | 0.155423 | 0.0004   | 0.001487 | 515 | 462 |
| CCDC17    | 0.155503 | 0.000397 | 0.001477 | 515 | 514 |
| SERPINA5  | 0.155525 | 0.000396 | 0.001475 | 515 | 505 |
| ELAVL4    | 0.15555  | 0.000396 | 0.001472 | 515 | 465 |
| GNB3      | 0.155555 | 0.000395 | 0.001472 | 515 | 513 |
| C3orf16   | 0.155564 | 0.000395 | 0.001471 | 515 | 361 |
| PCDHB7    | 0.155604 | 0.000394 | 0.001466 | 515 | 515 |
| HAR1A     | 0.155605 | 0.000394 | 0.001466 | 515 | 506 |
| RBMS3     | 0.155636 | 0.000393 | 0.001463 | 515 | 515 |
| PBX3      | 0.155729 | 0.000389 | 0.001453 | 515 | 515 |
| MORN5     | 0.155774 | 0.000388 | 0.001448 | 515 | 440 |
| CD207     | 0.155803 | 0.000387 | 0.001445 | 515 | 508 |
| MYL6      | 0.155891 | 0.000384 | 0.001434 | 515 | 515 |
| ARMC8     | 0.155982 | 0.000381 | 0.001423 | 515 | 515 |
| PHTF2     | 0.155992 | 0.000381 | 0.001422 | 515 | 515 |
| DIRAS3    | 0.156005 | 0.00038  | 0.001421 | 515 | 513 |
| C7orf23   | 0.156007 | 0.00038  | 0.001421 | 515 | 515 |
| VPS13C    | 0.156082 | 0.000378 | 0.001412 | 515 | 515 |
| SH3BP5    | 0.156084 | 0.000378 | 0.001412 | 515 | 515 |
| CCL16     | 0.156113 | 0.000377 | 0.001409 | 515 | 326 |
| EFR3A     | 0.156116 | 0.000376 | 0.001409 | 515 | 515 |
| TMEM14E   | 0.156124 | 0.000376 | 0.001408 | 515 | 314 |
| LRFN1     | 0.156181 | 0.000374 | 0.001402 | 515 | 515 |
| C9orf44   | 0.156224 | 0.000373 | 0.001397 | 515 | 350 |
| PIKFYVE   | 0.156258 | 0.000372 | 0.001393 | 515 | 515 |
| CHST3     | 0.156281 | 0.000371 | 0.001391 | 515 | 515 |
| RAB12     | 0.156304 | 0.00037  | 0.001389 | 515 | 515 |

|          |          |          |          |     |     |
|----------|----------|----------|----------|-----|-----|
| NRGN     | 0.156459 | 0.000365 | 0.001371 | 515 | 515 |
| PAOX     | 0.156506 | 0.000364 | 0.001366 | 515 | 515 |
| APCDD1   | 0.156522 | 0.000363 | 0.001364 | 515 | 515 |
| LTB4R    | 0.156559 | 0.000362 | 0.00136  | 515 | 515 |
| CHST9    | 0.156569 | 0.000362 | 0.001359 | 515 | 461 |
| PPP3CB   | 0.156618 | 0.00036  | 0.001354 | 515 | 515 |
| HOXA3    | 0.156619 | 0.00036  | 0.001354 | 515 | 515 |
| CCNL1    | 0.156689 | 0.000358 | 0.001347 | 515 | 515 |
| CDCP2    | 0.156781 | 0.000355 | 0.001337 | 515 | 321 |
| GLI2     | 0.156812 | 0.000354 | 0.001333 | 515 | 515 |
| SNX29    | 0.156857 | 0.000353 | 0.001329 | 515 | 515 |
| PLXND1   | 0.156869 | 0.000352 | 0.001328 | 515 | 515 |
| ZNF426   | 0.156919 | 0.000351 | 0.001323 | 515 | 515 |
| DMC1     | 0.156929 | 0.00035  | 0.001322 | 515 | 509 |
| CDKN2BAS | 0.156932 | 0.00035  | 0.001322 | 515 | 502 |
| C15orf57 | 0.156947 | 0.00035  | 0.00132  | 515 | 515 |
| SYT15    | 0.157025 | 0.000348 | 0.001312 | 515 | 515 |
| RGS14    | 0.157047 | 0.000347 | 0.00131  | 515 | 515 |
| SHROOM4  | 0.157136 | 0.000344 | 0.0013   | 515 | 515 |
| SRFBP1   | 0.157201 | 0.000342 | 0.001294 | 515 | 515 |
| FAM129A  | 0.157354 | 0.000338 | 0.001278 | 515 | 515 |
| CDH5     | 0.157358 | 0.000337 | 0.001278 | 515 | 515 |
| SLU7     | 0.157425 | 0.000335 | 0.00127  | 515 | 515 |
| VAMP7    | 0.157469 | 0.000334 | 0.001266 | 515 | 515 |
| LAMA1    | 0.157507 | 0.000333 | 0.001262 | 515 | 515 |
| AVIL     | 0.157507 | 0.000333 | 0.001262 | 515 | 515 |
| ZNF589   | 0.157529 | 0.000332 | 0.00126  | 515 | 515 |
| PTPRVP   | 0.157552 | 0.000332 | 0.001257 | 515 | 466 |
| ZNF189   | 0.157613 | 0.00033  | 0.001252 | 515 | 515 |
| ZNF654   | 0.157636 | 0.000329 | 0.00125  | 515 | 515 |
| USP4     | 0.15774  | 0.000326 | 0.001239 | 515 | 515 |
| ATXN7    | 0.157763 | 0.000326 | 0.001236 | 515 | 515 |
| FAM151A  | 0.157771 | 0.000325 | 0.001236 | 515 | 315 |
| C1orf126 | 0.157782 | 0.000325 | 0.001235 | 515 | 515 |
| AP4S1    | 0.157833 | 0.000324 | 0.00123  | 515 | 515 |
| NEU3     | 0.15792  | 0.000321 | 0.001221 | 515 | 515 |
| ZBTB26   | 0.15794  | 0.000321 | 0.001219 | 515 | 515 |
| CHST4    | 0.157974 | 0.00032  | 0.001216 | 515 | 501 |
| VWA3A    | 0.158032 | 0.000318 | 0.00121  | 515 | 470 |
| PPP1R2P3 | 0.158042 | 0.000318 | 0.00121  | 515 | 515 |
| TTLL9    | 0.158061 | 0.000317 | 0.001208 | 515 | 515 |
| GSPT2    | 0.158127 | 0.000315 | 0.001201 | 515 | 515 |
| BTC      | 0.158153 | 0.000315 | 0.001199 | 515 | 511 |
| C15orf26 | 0.158202 | 0.000313 | 0.001194 | 515 | 473 |
| TNN      | 0.158217 | 0.000313 | 0.001193 | 515 | 505 |
| TMEM232  | 0.158225 | 0.000313 | 0.001192 | 515 | 493 |
| UGT8     | 0.158227 | 0.000312 | 0.001192 | 515 | 513 |
| DR1      | 0.158238 | 0.000312 | 0.001191 | 515 | 515 |
| CTTNBP2  | 0.158249 | 0.000312 | 0.00119  | 515 | 515 |
| SHC3     | 0.158278 | 0.000311 | 0.001188 | 515 | 514 |
| NRK      | 0.158281 | 0.000311 | 0.001188 | 515 | 515 |
| CCL20    | 0.15829  | 0.000311 | 0.001187 | 515 | 515 |
| SLC34A2  | 0.158297 | 0.000311 | 0.001187 | 515 | 515 |
| NHSL2    | 0.158313 | 0.00031  | 0.001186 | 515 | 515 |

|           |          |          |          |     |     |
|-----------|----------|----------|----------|-----|-----|
| CHSY1     | 0.15849  | 0.000305 | 0.001168 | 515 | 515 |
| PAPSS2    | 0.158609 | 0.000302 | 0.001157 | 515 | 515 |
| FBXL3     | 0.15865  | 0.000301 | 0.001153 | 515 | 515 |
| ARL2BP    | 0.158668 | 0.0003   | 0.001152 | 515 | 515 |
| MT1A      | 0.158702 | 0.0003   | 0.001149 | 515 | 492 |
| ASPN      | 0.158766 | 0.000298 | 0.001143 | 515 | 515 |
| RHOQ      | 0.158778 | 0.000298 | 0.001142 | 515 | 515 |
| DRGX      | 0.158801 | 0.000297 | 0.00114  | 515 | 268 |
| DNAH9     | 0.15884  | 0.000296 | 0.001137 | 515 | 495 |
| GRRP1     | 0.158849 | 0.000296 | 0.001136 | 515 | 515 |
| C16orf86  | 0.158866 | 0.000295 | 0.001135 | 515 | 515 |
| GPR87     | 0.158872 | 0.000295 | 0.001135 | 515 | 493 |
| ZNF222    | 0.158907 | 0.000294 | 0.001132 | 515 | 515 |
| ZNF551    | 0.158917 | 0.000294 | 0.001131 | 515 | 515 |
| ADAMTS1   | 0.158973 | 0.000292 | 0.001126 | 515 | 515 |
| FAM32A    | 0.158975 | 0.000292 | 0.001126 | 515 | 515 |
| LCN8      | 0.158997 | 0.000292 | 0.001124 | 515 | 139 |
| LACE1     | 0.159044 | 0.000291 | 0.001119 | 515 | 515 |
| C9orf102  | 0.159044 | 0.000291 | 0.001119 | 515 | 515 |
| C3orf55   | 0.159125 | 0.000288 | 0.001112 | 515 | 513 |
| ZNF529    | 0.159208 | 0.000286 | 0.001104 | 515 | 515 |
| FAM164A   | 0.159216 | 0.000286 | 0.001103 | 515 | 515 |
| FBXO30    | 0.159242 | 0.000285 | 0.001101 | 515 | 515 |
| CASQ2     | 0.159365 | 0.000282 | 0.00109  | 515 | 498 |
| SYT6      | 0.15937  | 0.000282 | 0.001089 | 515 | 451 |
| SHISA5    | 0.15947  | 0.00028  | 0.00108  | 515 | 515 |
| PCDH15    | 0.159472 | 0.00028  | 0.00108  | 515 | 400 |
| C1orf141  | 0.159498 | 0.000279 | 0.001078 | 515 | 251 |
| DYRK2     | 0.159542 | 0.000278 | 0.001074 | 515 | 515 |
| TK2       | 0.159668 | 0.000275 | 0.001063 | 515 | 515 |
| NRIP2     | 0.159754 | 0.000273 | 0.001055 | 515 | 515 |
| RXFP2     | 0.159859 | 0.00027  | 0.001046 | 515 | 107 |
| LOC221442 | 0.159923 | 0.000269 | 0.001041 | 515 | 515 |
| CYTL1     | 0.160024 | 0.000266 | 0.001032 | 515 | 513 |
| ZNF846    | 0.160117 | 0.000264 | 0.001025 | 515 | 515 |
| ANK1      | 0.160209 | 0.000262 | 0.001017 | 515 | 514 |
| HEPN1     | 0.160255 | 0.000261 | 0.001013 | 515 | 216 |
| TBC1D29   | 0.160274 | 0.00026  | 0.001011 | 515 | 204 |
| ACOT7     | 0.16033  | 0.000259 | 0.001006 | 515 | 515 |
| SCN3B     | 0.160352 | 0.000258 | 0.001004 | 515 | 512 |
| LUZP6     | 0.160365 | 0.000258 | 0.001003 | 515 | 515 |
| DDX5      | 0.160415 | 0.000257 | 0.000999 | 515 | 515 |
| PPP6C     | 0.160508 | 0.000255 | 0.000991 | 515 | 515 |
| PPIL5     | 0.160514 | 0.000255 | 0.000991 | 515 | 515 |
| BRP44L    | 0.16056  | 0.000254 | 0.000987 | 515 | 515 |
| MMP28     | 0.160578 | 0.000253 | 0.000986 | 515 | 514 |
| C17orf48  | 0.160696 | 0.000251 | 0.000976 | 515 | 515 |
| KIAA1524  | 0.160717 | 0.00025  | 0.000975 | 515 | 515 |
| ZCCHC9    | 0.160758 | 0.000249 | 0.000972 | 515 | 515 |
| ADAMTS4   | 0.16086  | 0.000247 | 0.000964 | 515 | 515 |
| MGC42105  | 0.160881 | 0.000246 | 0.000962 | 515 | 505 |
| RHOF      | 0.161024 | 0.000243 | 0.000951 | 515 | 515 |
| RASL10A   | 0.161053 | 0.000243 | 0.000949 | 515 | 505 |
| EIF2AK2   | 0.161086 | 0.000242 | 0.000946 | 515 | 515 |

|           |          |          |          |     |     |
|-----------|----------|----------|----------|-----|-----|
| CASP3     | 0.161113 | 0.000241 | 0.000944 | 515 | 515 |
| PRKCG     | 0.161243 | 0.000238 | 0.000935 | 515 | 418 |
| AGAP11    | 0.161294 | 0.000237 | 0.000931 | 515 | 513 |
| CHD9      | 0.161429 | 0.000234 | 0.00092  | 515 | 515 |
| SEC14L1   | 0.16153  | 0.000232 | 0.000912 | 515 | 515 |
| HLF       | 0.161543 | 0.000232 | 0.000911 | 515 | 515 |
| ZNF564    | 0.161619 | 0.00023  | 0.000906 | 515 | 515 |
| SLC5A8    | 0.161635 | 0.00023  | 0.000905 | 515 | 458 |
| FNIP2     | 0.161708 | 0.000229 | 0.000899 | 515 | 515 |
| AG2       | 0.161767 | 0.000227 | 0.000895 | 515 | 515 |
| RAB9B     | 0.161779 | 0.000227 | 0.000894 | 515 | 490 |
| CYB561D1  | 0.161834 | 0.000226 | 0.00089  | 515 | 515 |
| C20orf203 | 0.161851 | 0.000226 | 0.000889 | 515 | 417 |
| PAQR3     | 0.161995 | 0.000223 | 0.000878 | 515 | 515 |
| FLJ42709  | 0.162005 | 0.000223 | 0.000878 | 515 | 515 |
| NHS       | 0.162025 | 0.000222 | 0.000876 | 515 | 515 |
| SCN1A     | 0.162197 | 0.000219 | 0.000863 | 515 | 491 |
| PRG4      | 0.162263 | 0.000217 | 0.000859 | 515 | 515 |
| TLL1      | 0.162317 | 0.000216 | 0.000855 | 515 | 515 |
| STK11     | 0.162321 | 0.000216 | 0.000855 | 515 | 515 |
| RSBN1     | 0.162332 | 0.000216 | 0.000854 | 515 | 515 |
| C17orf54  | 0.162366 | 0.000215 | 0.000852 | 515 | 365 |
| ZNF197    | 0.162417 | 0.000214 | 0.000848 | 515 | 515 |
| CDC42EP3  | 0.162464 | 0.000213 | 0.000845 | 515 | 515 |
| C4A       | 0.162465 | 0.000213 | 0.000845 | 515 | 515 |
| KPNA5     | 0.162597 | 0.000211 | 0.000836 | 515 | 515 |
| STAG3L3   | 0.162607 | 0.000211 | 0.000835 | 515 | 515 |
| BTG4      | 0.162637 | 0.00021  | 0.000833 | 515 | 267 |
| COL1A1    | 0.162814 | 0.000207 | 0.000821 | 515 | 515 |
| BACE1     | 0.16282  | 0.000207 | 0.00082  | 515 | 515 |
| SELM      | 0.162859 | 0.000206 | 0.000818 | 515 | 515 |
| USP38     | 0.162888 | 0.000205 | 0.000816 | 515 | 515 |
| GLA       | 0.162891 | 0.000205 | 0.000816 | 515 | 515 |
| POLE3     | 0.1629   | 0.000205 | 0.000815 | 515 | 515 |
| NPAT      | 0.162929 | 0.000205 | 0.000813 | 515 | 515 |
| NPTXR     | 0.162967 | 0.000204 | 0.000811 | 515 | 515 |
| FBX043    | 0.162974 | 0.000204 | 0.00081  | 515 | 515 |
| OGT       | 0.163004 | 0.000203 | 0.000808 | 515 | 515 |
| LIPT1     | 0.163174 | 0.0002   | 0.000796 | 515 | 515 |
| RGS11     | 0.163198 | 0.0002   | 0.000795 | 515 | 515 |
| KCND1     | 0.163239 | 0.000199 | 0.000792 | 515 | 515 |
| EXOC5     | 0.16326  | 0.000198 | 0.000791 | 515 | 515 |
| DCDC2B    | 0.163304 | 0.000198 | 0.000788 | 515 | 406 |
| FAM48B1   | 0.163367 | 0.000197 | 0.000783 | 515 | 142 |
| TSC22D2   | 0.163409 | 0.000196 | 0.000781 | 515 | 515 |
| DPYSL3    | 0.163413 | 0.000196 | 0.00078  | 515 | 515 |
| GDF10     | 0.163518 | 0.000194 | 0.000774 | 515 | 511 |
| C6orf225  | 0.163614 | 0.000192 | 0.000767 | 515 | 515 |
| ELOVL6    | 0.163616 | 0.000192 | 0.000767 | 515 | 515 |
| PTPRQ     | 0.163631 | 0.000192 | 0.000766 | 515 | 400 |
| CELF6     | 0.163676 | 0.000191 | 0.000763 | 515 | 515 |
| C16orf72  | 0.163715 | 0.00019  | 0.000761 | 515 | 515 |
| GREB1L    | 0.163744 | 0.00019  | 0.000759 | 515 | 502 |
| LRRC36    | 0.163761 | 0.00019  | 0.000758 | 515 | 511 |

|           |          |          |          |     |     |
|-----------|----------|----------|----------|-----|-----|
| LOC100134 | 0.16381  | 0.000189 | 0.000755 | 515 | 513 |
| GRIA1     | 0.163813 | 0.000189 | 0.000755 | 515 | 482 |
| H2BFXP    | 0.163822 | 0.000189 | 0.000755 | 515 | 457 |
| LOC400891 | 0.163902 | 0.000187 | 0.00075  | 515 | 359 |
| VAMP8     | 0.163945 | 0.000186 | 0.000747 | 515 | 515 |
| SLC35A5   | 0.163963 | 0.000186 | 0.000746 | 515 | 515 |
| NCRNA0018 | 0.164213 | 0.000182 | 0.00073  | 515 | 435 |
| PRUNE2    | 0.16427  | 0.000181 | 0.000727 | 515 | 515 |
| TNFRSF6B  | 0.164282 | 0.000181 | 0.000726 | 515 | 515 |
| MMGT1     | 0.16439  | 0.000179 | 0.00072  | 515 | 515 |
| ZNF431    | 0.164402 | 0.000179 | 0.000719 | 515 | 515 |
| LILRP2    | 0.164406 | 0.000179 | 0.000719 | 515 | 379 |
| IGSF21    | 0.164423 | 0.000178 | 0.000718 | 515 | 505 |
| LOC728264 | 0.164503 | 0.000177 | 0.000713 | 515 | 515 |
| CCDC81    | 0.164528 | 0.000177 | 0.000711 | 515 | 512 |
| CDHR4     | 0.164536 | 0.000177 | 0.000711 | 515 | 455 |
| CHFR      | 0.164552 | 0.000176 | 0.00071  | 515 | 515 |
| FUT8      | 0.164662 | 0.000174 | 0.000704 | 515 | 515 |
| COL5A2    | 0.164675 | 0.000174 | 0.000703 | 515 | 515 |
| TBX3      | 0.164685 | 0.000174 | 0.000702 | 515 | 515 |
| C9orf171  | 0.164736 | 0.000173 | 0.000699 | 515 | 433 |
| PLA2R1    | 0.164835 | 0.000172 | 0.000694 | 515 | 515 |
| HHLA2     | 0.16486  | 0.000171 | 0.000693 | 515 | 507 |
| ALK       | 0.164869 | 0.000171 | 0.000692 | 515 | 491 |
| TRHDE     | 0.164984 | 0.000169 | 0.000685 | 515 | 457 |
| TTC7B     | 0.164998 | 0.000169 | 0.000685 | 515 | 515 |
| CYP2S1    | 0.164999 | 0.000169 | 0.000685 | 515 | 515 |
| PCDH11X   | 0.165044 | 0.000168 | 0.000682 | 515 | 376 |
| MT1F      | 0.165064 | 0.000168 | 0.000681 | 515 | 515 |
| RFFL      | 0.165109 | 0.000167 | 0.000678 | 515 | 515 |
| GRAMD1B   | 0.165123 | 0.000167 | 0.000678 | 515 | 514 |
| PGAM1     | 0.165195 | 0.000166 | 0.000673 | 515 | 515 |
| GABRE     | 0.165228 | 0.000166 | 0.000671 | 515 | 515 |
| FGFBP1    | 0.165265 | 0.000165 | 0.000669 | 515 | 509 |
| ATF3      | 0.16528  | 0.000165 | 0.000669 | 515 | 515 |
| RSU1      | 0.165359 | 0.000164 | 0.000664 | 515 | 515 |
| MAP1LC3B  | 0.165426 | 0.000163 | 0.00066  | 515 | 515 |
| TBC1D22A  | 0.165482 | 0.000162 | 0.000657 | 515 | 515 |
| FAM170B   | 0.165499 | 0.000162 | 0.000656 | 515 | 194 |
| GLI3      | 0.165507 | 0.000161 | 0.000656 | 515 | 515 |
| SPRR1B    | 0.165589 | 0.00016  | 0.000652 | 515 | 403 |
| CALB2     | 0.165669 | 0.000159 | 0.000647 | 515 | 502 |
| INSM2     | 0.165713 | 0.000158 | 0.000645 | 515 | 376 |
| LGALS9C   | 0.165738 | 0.000158 | 0.000644 | 515 | 515 |
| RFPL1S    | 0.165747 | 0.000158 | 0.000643 | 515 | 503 |
| ISG15     | 0.165748 | 0.000158 | 0.000643 | 515 | 515 |
| EMCN      | 0.165797 | 0.000157 | 0.000641 | 515 | 515 |
| RGS2      | 0.165816 | 0.000157 | 0.00064  | 515 | 515 |
| PIGR      | 0.165854 | 0.000156 | 0.000638 | 515 | 515 |
| EFHC2     | 0.165903 | 0.000156 | 0.000635 | 515 | 513 |
| NEDD4     | 0.165928 | 0.000155 | 0.000634 | 515 | 515 |
| ZCCHC6    | 0.165929 | 0.000155 | 0.000634 | 515 | 515 |
| COL15A1   | 0.165938 | 0.000155 | 0.000633 | 515 | 515 |
| AEBP1     | 0.165942 | 0.000155 | 0.000633 | 515 | 515 |



|           |          |          |          |     |     |
|-----------|----------|----------|----------|-----|-----|
| NCR2      | 0.16604  | 0.000154 | 0.000628 | 515 | 149 |
| NOX4      | 0.166055 | 0.000153 | 0.000627 | 515 | 515 |
| SAP30     | 0.166063 | 0.000153 | 0.000627 | 515 | 515 |
| GPR173    | 0.166116 | 0.000153 | 0.000624 | 515 | 514 |
| LRRC17    | 0.166128 | 0.000152 | 0.000624 | 515 | 515 |
| MGC16703  | 0.166159 | 0.000152 | 0.000622 | 515 | 480 |
| DKFZp434J | 0.166183 | 0.000152 | 0.000621 | 515 | 434 |
| MAPK10    | 0.166226 | 0.000151 | 0.000619 | 515 | 515 |
| FBX032    | 0.1663   | 0.00015  | 0.000615 | 515 | 515 |
| FBX05     | 0.166365 | 0.000149 | 0.000611 | 515 | 515 |
| RPL13AP17 | 0.166397 | 0.000149 | 0.00061  | 515 | 399 |
| AP1M1     | 0.166404 | 0.000148 | 0.000609 | 515 | 515 |
| C5orf4    | 0.166423 | 0.000148 | 0.000609 | 515 | 515 |
| DNAH1     | 0.166442 | 0.000148 | 0.000608 | 515 | 515 |
| LGALS12   | 0.166443 | 0.000148 | 0.000608 | 515 | 485 |
| SFRP5     | 0.166466 | 0.000148 | 0.000607 | 515 | 459 |
| ZNF134    | 0.166527 | 0.000147 | 0.000604 | 515 | 515 |
| C1orf220  | 0.166547 | 0.000147 | 0.000603 | 515 | 515 |
| C7orf63   | 0.166588 | 0.000146 | 0.000601 | 515 | 515 |
| CMAH      | 0.166607 | 0.000146 | 0.0006   | 515 | 515 |
| BPGM      | 0.166609 | 0.000146 | 0.0006   | 515 | 515 |
| FOLR4     | 0.166644 | 0.000145 | 0.000598 | 515 | 115 |
| HBB       | 0.166734 | 0.000144 | 0.000593 | 515 | 515 |
| WFDC10B   | 0.166746 | 0.000144 | 0.000593 | 515 | 486 |
| VAC14     | 0.166809 | 0.000143 | 0.000589 | 515 | 515 |
| DUSP10    | 0.166851 | 0.000142 | 0.000587 | 515 | 515 |
| STARD13   | 0.167024 | 0.00014  | 0.000578 | 515 | 515 |
| LOC100133 | 0.167026 | 0.00014  | 0.000578 | 515 | 368 |
| GALNT10   | 0.167064 | 0.00014  | 0.000576 | 515 | 515 |
| STK32A    | 0.167106 | 0.000139 | 0.000574 | 515 | 508 |
| CCDC146   | 0.167205 | 0.000138 | 0.00057  | 515 | 515 |
| DEF8      | 0.167205 | 0.000138 | 0.00057  | 515 | 515 |
| LOC541471 | 0.167234 | 0.000137 | 0.000568 | 515 | 515 |
| NUP210    | 0.16724  | 0.000137 | 0.000568 | 515 | 515 |
| ABCA4     | 0.167248 | 0.000137 | 0.000568 | 515 | 514 |
| USP25     | 0.167284 | 0.000137 | 0.000566 | 515 | 515 |
| ZNF224    | 0.167303 | 0.000137 | 0.000565 | 515 | 515 |
| ACRC      | 0.167356 | 0.000136 | 0.000563 | 515 | 515 |
| GATM      | 0.16738  | 0.000136 | 0.000562 | 515 | 515 |
| ZNF354C   | 0.167394 | 0.000135 | 0.000561 | 515 | 513 |
| MCL1      | 0.167461 | 0.000135 | 0.000558 | 515 | 515 |
| MT1E      | 0.167479 | 0.000134 | 0.000557 | 515 | 515 |
| MTVR2     | 0.167564 | 0.000133 | 0.000553 | 515 | 237 |
| SULT1C4   | 0.167566 | 0.000133 | 0.000553 | 515 | 515 |
| ZNF546    | 0.167588 | 0.000133 | 0.000552 | 515 | 515 |
| ZBBX      | 0.167704 | 0.000131 | 0.000547 | 515 | 441 |
| OR6S1     | 0.16771  | 0.000131 | 0.000547 | 515 | 65  |
| UBAC1     | 0.167731 | 0.000131 | 0.000546 | 515 | 515 |
| CXorf41   | 0.167751 | 0.000131 | 0.000546 | 515 | 359 |
| RHBDD1    | 0.167758 | 0.000131 | 0.000545 | 515 | 515 |
| SYDE1     | 0.167901 | 0.000129 | 0.000538 | 515 | 515 |
| STS       | 0.167921 | 0.000129 | 0.000538 | 515 | 514 |
| RTKN2     | 0.167974 | 0.000128 | 0.000535 | 515 | 515 |
| TRPC2     | 0.167985 | 0.000128 | 0.000535 | 515 | 456 |

|           |          |          |          |     |     |
|-----------|----------|----------|----------|-----|-----|
| PNPLA5    | 0.167985 | 0.000128 | 0.000535 | 515 | 219 |
| LIMS2     | 0.16801  | 0.000128 | 0.000534 | 515 | 515 |
| GOSR2     | 0.168167 | 0.000126 | 0.000527 | 515 | 515 |
| PHACTR2   | 0.168192 | 0.000126 | 0.000525 | 515 | 515 |
| CD59      | 0.168335 | 0.000124 | 0.000519 | 515 | 515 |
| ODF3B     | 0.168358 | 0.000124 | 0.000518 | 515 | 515 |
| GALNT5    | 0.168383 | 0.000123 | 0.000517 | 515 | 515 |
| FYTTD1    | 0.168409 | 0.000123 | 0.000516 | 515 | 515 |
| TM4SF19   | 0.168421 | 0.000123 | 0.000516 | 515 | 515 |
| C20orf85  | 0.168471 | 0.000122 | 0.000513 | 515 | 448 |
| DGKE      | 0.168472 | 0.000122 | 0.000513 | 515 | 515 |
| BCL2L11   | 0.168525 | 0.000122 | 0.000511 | 515 | 515 |
| ADARB1    | 0.168539 | 0.000122 | 0.000511 | 515 | 515 |
| TMED5     | 0.16856  | 0.000121 | 0.00051  | 515 | 515 |
| REL       | 0.168595 | 0.000121 | 0.000509 | 515 | 515 |
| HTRA1     | 0.168605 | 0.000121 | 0.000508 | 515 | 515 |
| RAD51L1   | 0.168655 | 0.00012  | 0.000506 | 515 | 515 |
| ITGA6     | 0.168684 | 0.00012  | 0.000505 | 515 | 515 |
| YSK4      | 0.168695 | 0.00012  | 0.000504 | 515 | 467 |
| BMP7      | 0.168709 | 0.00012  | 0.000504 | 515 | 512 |
| KLHL3     | 0.168716 | 0.00012  | 0.000504 | 515 | 515 |
| NAP1L1    | 0.168718 | 0.00012  | 0.000504 | 515 | 515 |
| TECTA     | 0.168762 | 0.000119 | 0.000502 | 515 | 513 |
| MSL2      | 0.168765 | 0.000119 | 0.000502 | 515 | 515 |
| CAPN3     | 0.16879  | 0.000119 | 0.000501 | 515 | 515 |
| CYP4V2    | 0.168892 | 0.000118 | 0.000496 | 515 | 515 |
| IFNB1     | 0.168978 | 0.000117 | 0.000493 | 515 | 192 |
| FEM1C     | 0.168997 | 0.000116 | 0.000492 | 515 | 515 |
| RD3       | 0.169003 | 0.000116 | 0.000492 | 515 | 392 |
| NRG2      | 0.169032 | 0.000116 | 0.000491 | 515 | 485 |
| PDE3B     | 0.169093 | 0.000115 | 0.000488 | 515 | 515 |
| SNX18     | 0.169108 | 0.000115 | 0.000487 | 515 | 515 |
| PCDH7     | 0.16911  | 0.000115 | 0.000487 | 515 | 515 |
| SOX8      | 0.169153 | 0.000115 | 0.000486 | 515 | 514 |
| UFSP2     | 0.169166 | 0.000115 | 0.000485 | 515 | 515 |
| CETN4P    | 0.169321 | 0.000113 | 0.000478 | 515 | 435 |
| ZNF234    | 0.169333 | 0.000113 | 0.000478 | 515 | 515 |
| PECR      | 0.169337 | 0.000113 | 0.000478 | 515 | 515 |
| CRABP2    | 0.169371 | 0.000112 | 0.000477 | 515 | 515 |
| PCNXL2    | 0.169372 | 0.000112 | 0.000477 | 515 | 515 |
| PRICKLE1  | 0.169404 | 0.000112 | 0.000475 | 515 | 515 |
| NCOA4     | 0.169439 | 0.000112 | 0.000474 | 515 | 515 |
| ZNF562    | 0.169473 | 0.000111 | 0.000473 | 515 | 515 |
| TMEM43    | 0.169541 | 0.000111 | 0.00047  | 515 | 515 |
| C5orf25   | 0.169558 | 0.00011  | 0.00047  | 515 | 515 |
| DIAPH2    | 0.169585 | 0.00011  | 0.000469 | 515 | 515 |
| ACSL1     | 0.169596 | 0.00011  | 0.000468 | 515 | 515 |
| LOC100192 | 0.169652 | 0.000109 | 0.000466 | 515 | 182 |
| GCOM1     | 0.169663 | 0.000109 | 0.000466 | 515 | 515 |
| PRPS1     | 0.169683 | 0.000109 | 0.000465 | 515 | 515 |
| UST       | 0.169703 | 0.000109 | 0.000464 | 515 | 515 |
| NLRP14    | 0.169822 | 0.000108 | 0.000459 | 515 | 416 |
| STRADA    | 0.169891 | 0.000107 | 0.000456 | 515 | 515 |
| LIMK1     | 0.169946 | 0.000106 | 0.000454 | 515 | 515 |

|           |          |          |          |     |     |
|-----------|----------|----------|----------|-----|-----|
| IRAK2     | 0.170005 | 0.000106 | 0.000452 | 515 | 515 |
| HBD       | 0.170019 | 0.000106 | 0.000451 | 515 | 360 |
| SCT       | 0.170196 | 0.000104 | 0.000444 | 515 | 455 |
| DMBX1     | 0.170273 | 0.000103 | 0.000441 | 515 | 477 |
| GALM      | 0.170344 | 0.000102 | 0.000438 | 515 | 515 |
| IFIT1B    | 0.170459 | 0.000101 | 0.000434 | 515 | 228 |
| DDB2      | 0.170468 | 0.000101 | 0.000433 | 515 | 515 |
| S100A5    | 0.170502 | 0.000101 | 0.000432 | 515 | 450 |
| FOXD4L6   | 0.170615 | 9.98E-05 | 0.000428 | 515 | 455 |
| MXRA7     | 0.170653 | 9.95E-05 | 0.000426 | 515 | 515 |
| ALKBH3    | 0.170752 | 9.85E-05 | 0.000423 | 515 | 515 |
| SLC16A10  | 0.170819 | 9.79E-05 | 0.00042  | 515 | 515 |
| MMRN2     | 0.170853 | 9.76E-05 | 0.000419 | 515 | 515 |
| RUNDC2A   | 0.170866 | 9.75E-05 | 0.000419 | 515 | 515 |
| STARD4    | 0.170871 | 9.74E-05 | 0.000419 | 515 | 515 |
| UBE2D1    | 0.170908 | 9.71E-05 | 0.000417 | 515 | 515 |
| ZNF547    | 0.171008 | 9.61E-05 | 0.000413 | 515 | 515 |
| INPP1     | 0.171065 | 9.56E-05 | 0.000411 | 515 | 515 |
| STAB2     | 0.171196 | 9.44E-05 | 0.000406 | 515 | 493 |
| FBXL5     | 0.171219 | 9.42E-05 | 0.000406 | 515 | 515 |
| SPATS1    | 0.171229 | 9.41E-05 | 0.000405 | 515 | 321 |
| SCAMP5    | 0.171308 | 9.34E-05 | 0.000403 | 515 | 515 |
| KLF11     | 0.171338 | 9.32E-05 | 0.000401 | 515 | 515 |
| GAS2L3    | 0.171394 | 9.27E-05 | 0.000399 | 515 | 514 |
| C10orf116 | 0.171403 | 9.26E-05 | 0.000399 | 515 | 515 |
| PSMA6     | 0.171404 | 9.26E-05 | 0.000399 | 515 | 515 |
| SPPL2A    | 0.171406 | 9.25E-05 | 0.000399 | 515 | 515 |
| PGM5P2    | 0.171453 | 9.21E-05 | 0.000398 | 515 | 481 |
| C18orf8   | 0.171474 | 9.19E-05 | 0.000397 | 515 | 515 |
| CCDC82    | 0.171478 | 9.19E-05 | 0.000397 | 515 | 515 |
| AFAP1L1   | 0.171489 | 9.18E-05 | 0.000396 | 515 | 515 |
| RBP1      | 0.171501 | 9.17E-05 | 0.000396 | 515 | 515 |
| RGS22     | 0.17154  | 9.14E-05 | 0.000395 | 515 | 499 |
| DRD5      | 0.171586 | 9.10E-05 | 0.000393 | 515 | 421 |
| GUCA1A    | 0.17159  | 9.09E-05 | 0.000393 | 515 | 423 |
| ZNF461    | 0.171676 | 9.02E-05 | 0.00039  | 515 | 515 |
| MYO7B     | 0.171714 | 8.99E-05 | 0.000389 | 515 | 512 |
| RBMXL2    | 0.171798 | 8.91E-05 | 0.000386 | 515 | 232 |
| MTTP      | 0.171808 | 8.91E-05 | 0.000386 | 515 | 496 |
| SLC14A1   | 0.171847 | 8.87E-05 | 0.000384 | 515 | 515 |
| RERG      | 0.171875 | 8.85E-05 | 0.000383 | 515 | 515 |
| NPHP3     | 0.171885 | 8.84E-05 | 0.000383 | 515 | 515 |
| SPACA3    | 0.171897 | 8.83E-05 | 0.000383 | 515 | 318 |
| FAM122A   | 0.171941 | 8.79E-05 | 0.000381 | 515 | 515 |
| CCDC53    | 0.17203  | 8.72E-05 | 0.000378 | 515 | 515 |
| SGPP2     | 0.172148 | 8.62E-05 | 0.000374 | 515 | 515 |
| DSCR3     | 0.172174 | 8.60E-05 | 0.000373 | 515 | 515 |
| BEX4      | 0.172203 | 8.57E-05 | 0.000372 | 515 | 515 |
| KLHL29    | 0.172218 | 8.56E-05 | 0.000372 | 515 | 515 |
| NOC3L     | 0.172348 | 8.45E-05 | 0.000368 | 515 | 515 |
| OR1L8     | 0.172359 | 8.44E-05 | 0.000367 | 515 | 276 |
| SLN       | 0.172425 | 8.39E-05 | 0.000365 | 515 | 435 |
| FAM171A1  | 0.172429 | 8.39E-05 | 0.000365 | 515 | 515 |
| ECHDC1    | 0.17258  | 8.27E-05 | 0.00036  | 515 | 515 |

|           |          |          |          |     |     |
|-----------|----------|----------|----------|-----|-----|
| SLC02A1   | 0.172598 | 8.25E-05 | 0.000359 | 515 | 515 |
| APBA3     | 0.172624 | 8.23E-05 | 0.000359 | 515 | 515 |
| CXCL6     | 0.172636 | 8.22E-05 | 0.000358 | 515 | 499 |
| LOC283867 | 0.172649 | 8.21E-05 | 0.000358 | 515 | 496 |
| NGFR      | 0.172732 | 8.15E-05 | 0.000355 | 515 | 515 |
| PARP3     | 0.172768 | 8.12E-05 | 0.000354 | 515 | 515 |
| RXFP1     | 0.17282  | 8.08E-05 | 0.000352 | 515 | 494 |
| PRSS36    | 0.172911 | 8.01E-05 | 0.00035  | 515 | 514 |
| ZNF561    | 0.172942 | 7.98E-05 | 0.000349 | 515 | 515 |
| SEL1L3    | 0.172969 | 7.96E-05 | 0.000348 | 515 | 515 |
| OTUD4     | 0.172975 | 7.96E-05 | 0.000348 | 515 | 515 |
| ERVFRDE1  | 0.17302  | 7.92E-05 | 0.000346 | 515 | 482 |
| CD200R1L  | 0.173142 | 7.83E-05 | 0.000343 | 515 | 169 |
| BAK1      | 0.173215 | 7.78E-05 | 0.000341 | 515 | 515 |
| SH3BP2    | 0.173335 | 7.69E-05 | 0.000337 | 515 | 515 |
| PVRL3     | 0.173433 | 7.61E-05 | 0.000334 | 515 | 515 |
| PRKX      | 0.173509 | 7.56E-05 | 0.000332 | 515 | 515 |
| SULT1C2   | 0.173538 | 7.54E-05 | 0.000331 | 515 | 514 |
| ZNF107    | 0.173563 | 7.52E-05 | 0.00033  | 515 | 515 |
| LOC441204 | 0.173581 | 7.50E-05 | 0.00033  | 515 | 515 |
| ROD1      | 0.1736   | 7.49E-05 | 0.000329 | 515 | 515 |
| COL1A2    | 0.173609 | 7.48E-05 | 0.000329 | 515 | 515 |
| LOC100302 | 0.173651 | 7.45E-05 | 0.000328 | 515 | 515 |
| SDPR      | 0.173725 | 7.40E-05 | 0.000325 | 515 | 515 |
| FAM180B   | 0.173745 | 7.39E-05 | 0.000325 | 515 | 312 |
| C20orf16C | 0.173879 | 7.29E-05 | 0.000321 | 515 | 515 |
| SPTB      | 0.173922 | 7.26E-05 | 0.00032  | 515 | 515 |
| WDR37     | 0.17393  | 7.25E-05 | 0.00032  | 515 | 515 |
| GNA12     | 0.174032 | 7.18E-05 | 0.000317 | 515 | 515 |
| DMBT1     | 0.174065 | 7.16E-05 | 0.000316 | 515 | 514 |
| OSGIN2    | 0.174095 | 7.14E-05 | 0.000315 | 515 | 515 |
| RNF144B   | 0.174106 | 7.13E-05 | 0.000315 | 515 | 515 |
| TEKT1     | 0.17412  | 7.12E-05 | 0.000314 | 515 | 437 |
| B3GALNT1  | 0.174131 | 7.11E-05 | 0.000314 | 515 | 515 |
| CLDND2    | 0.174148 | 7.10E-05 | 0.000314 | 515 | 449 |
| YPEL2     | 0.174171 | 7.09E-05 | 0.000313 | 515 | 515 |
| TTC7A     | 0.174182 | 7.08E-05 | 0.000313 | 515 | 515 |
| SLC4A10   | 0.17428  | 7.01E-05 | 0.00031  | 515 | 474 |
| CSF3R     | 0.17428  | 7.01E-05 | 0.00031  | 515 | 515 |
| CCL28     | 0.17428  | 7.01E-05 | 0.00031  | 515 | 514 |
| HEPACAM   | 0.174305 | 6.99E-05 | 0.000309 | 515 | 161 |
| GSG2      | 0.174341 | 6.97E-05 | 0.000308 | 515 | 515 |
| TGFBR3    | 0.174394 | 6.93E-05 | 0.000307 | 515 | 515 |
| TMC07     | 0.174407 | 6.93E-05 | 0.000307 | 515 | 515 |
| RIMS3     | 0.174499 | 6.86E-05 | 0.000304 | 515 | 515 |
| HACL1     | 0.1745   | 6.86E-05 | 0.000304 | 515 | 515 |
| SERPINI2  | 0.174615 | 6.79E-05 | 0.000301 | 515 | 376 |
| TLN1      | 0.174753 | 6.70E-05 | 0.000298 | 515 | 515 |
| FIGF      | 0.174772 | 6.68E-05 | 0.000297 | 515 | 508 |
| PDE7A     | 0.174798 | 6.67E-05 | 0.000296 | 515 | 515 |
| NDRG2     | 0.174807 | 6.66E-05 | 0.000296 | 515 | 515 |
| ZFP37     | 0.17482  | 6.65E-05 | 0.000296 | 515 | 515 |
| HAS1      | 0.174863 | 6.62E-05 | 0.000295 | 515 | 490 |
| GSG1      | 0.174884 | 6.61E-05 | 0.000294 | 515 | 227 |

|           |          |          |          |     |     |
|-----------|----------|----------|----------|-----|-----|
| WNT7A     | 0.174889 | 6.61E-05 | 0.000294 | 515 | 466 |
| ARHGAP6   | 0.174892 | 6.60E-05 | 0.000294 | 515 | 515 |
| CDH20     | 0.174947 | 6.57E-05 | 0.000293 | 515 | 415 |
| ELSPBP1   | 0.174961 | 6.56E-05 | 0.000293 | 515 | 35  |
| RYR1      | 0.175037 | 6.51E-05 | 0.000291 | 515 | 515 |
| TRAM1L1   | 0.175048 | 6.51E-05 | 0.00029  | 515 | 515 |
| AKAP14    | 0.17506  | 6.50E-05 | 0.00029  | 515 | 362 |
| CXCL3     | 0.175116 | 6.46E-05 | 0.000289 | 515 | 515 |
| PPP2R3C   | 0.175146 | 6.44E-05 | 0.000288 | 515 | 515 |
| ZNF423    | 0.17518  | 6.42E-05 | 0.000287 | 515 | 515 |
| ZC3H12C   | 0.175196 | 6.41E-05 | 0.000287 | 515 | 515 |
| SCPEP1    | 0.175222 | 6.40E-05 | 0.000286 | 515 | 515 |
| CHST15    | 0.175271 | 6.36E-05 | 0.000285 | 515 | 515 |
| MED7      | 0.175294 | 6.35E-05 | 0.000284 | 515 | 515 |
| SLC43A3   | 0.175383 | 6.30E-05 | 0.000282 | 515 | 515 |
| XRCC4     | 0.175411 | 6.28E-05 | 0.000281 | 515 | 515 |
| DOPEY1    | 0.175464 | 6.25E-05 | 0.00028  | 515 | 515 |
| SLC25A30  | 0.175503 | 6.22E-05 | 0.000279 | 515 | 515 |
| TNXB      | 0.175557 | 6.19E-05 | 0.000278 | 515 | 515 |
| FAM69A    | 0.175607 | 6.16E-05 | 0.000277 | 515 | 515 |
| VWA5B1    | 0.175678 | 6.12E-05 | 0.000275 | 515 | 304 |
| FAM101A   | 0.175706 | 6.10E-05 | 0.000274 | 515 | 512 |
| ZNF540    | 0.175748 | 6.07E-05 | 0.000273 | 515 | 515 |
| CTSD      | 0.175749 | 6.07E-05 | 0.000273 | 515 | 515 |
| GATA5     | 0.175802 | 6.04E-05 | 0.000272 | 515 | 499 |
| L3MBTL4   | 0.17581  | 6.04E-05 | 0.000272 | 515 | 514 |
| SLC35B4   | 0.175999 | 5.93E-05 | 0.000267 | 515 | 515 |
| ACTN2     | 0.176    | 5.93E-05 | 0.000267 | 515 | 500 |
| STXBP6    | 0.176033 | 5.91E-05 | 0.000266 | 515 | 513 |
| TTBK2     | 0.176054 | 5.89E-05 | 0.000266 | 515 | 515 |
| PPP1R14C  | 0.176137 | 5.85E-05 | 0.000264 | 515 | 515 |
| C20orf194 | 0.176141 | 5.84E-05 | 0.000264 | 515 | 515 |
| NFKBIA    | 0.176237 | 5.79E-05 | 0.000262 | 515 | 515 |
| GABRP     | 0.176366 | 5.72E-05 | 0.000259 | 515 | 509 |
| GEFT      | 0.176416 | 5.69E-05 | 0.000257 | 515 | 515 |
| TNFRSF25  | 0.176468 | 5.66E-05 | 0.000256 | 515 | 515 |
| FAM43A    | 0.17653  | 5.62E-05 | 0.000255 | 515 | 515 |
| EID2B     | 0.176544 | 5.62E-05 | 0.000254 | 515 | 515 |
| MBL2      | 0.176592 | 5.59E-05 | 0.000253 | 515 | 112 |
| KDELC1    | 0.176657 | 5.55E-05 | 0.000252 | 515 | 515 |
| LRP1      | 0.176679 | 5.54E-05 | 0.000251 | 515 | 515 |
| ADH1A     | 0.176691 | 5.54E-05 | 0.000251 | 515 | 453 |
| LOC285780 | 0.176739 | 5.51E-05 | 0.00025  | 515 | 246 |
| DERL1     | 0.176772 | 5.49E-05 | 0.000249 | 515 | 515 |
| SFTPD     | 0.176838 | 5.46E-05 | 0.000248 | 515 | 515 |
| IL1F9     | 0.176916 | 5.41E-05 | 0.000246 | 515 | 413 |
| CDH3      | 0.176922 | 5.41E-05 | 0.000246 | 515 | 515 |
| DNAJC13   | 0.176991 | 5.37E-05 | 0.000244 | 515 | 515 |
| FMOD      | 0.177029 | 5.35E-05 | 0.000243 | 515 | 515 |
| RPS6KA1   | 0.177131 | 5.30E-05 | 0.000241 | 515 | 515 |
| SOAT1     | 0.177161 | 5.28E-05 | 0.00024  | 515 | 515 |
| ST18      | 0.177207 | 5.26E-05 | 0.000239 | 515 | 507 |
| ST6GAL1   | 0.177276 | 5.22E-05 | 0.000238 | 515 | 515 |
| RC3H2     | 0.177354 | 5.18E-05 | 0.000236 | 515 | 515 |

|           |          |          |          |     |     |
|-----------|----------|----------|----------|-----|-----|
| TSPAN18   | 0.177364 | 5.18E-05 | 0.000236 | 515 | 515 |
| INPP5B    | 0.177417 | 5.15E-05 | 0.000235 | 515 | 515 |
| FTSJD1    | 0.177454 | 5.13E-05 | 0.000234 | 515 | 515 |
| ZIK1      | 0.177455 | 5.13E-05 | 0.000234 | 515 | 515 |
| BCAT1     | 0.177463 | 5.13E-05 | 0.000234 | 515 | 515 |
| USP45     | 0.177481 | 5.12E-05 | 0.000234 | 515 | 515 |
| PLEKHF1   | 0.177546 | 5.09E-05 | 0.000232 | 515 | 515 |
| WNT6      | 0.17759  | 5.06E-05 | 0.000231 | 515 | 480 |
| GPD1      | 0.177605 | 5.06E-05 | 0.000231 | 515 | 515 |
| FAM167B   | 0.17761  | 5.05E-05 | 0.000231 | 515 | 515 |
| AZI2      | 0.177657 | 5.03E-05 | 0.00023  | 515 | 515 |
| RABGAP1L  | 0.177671 | 5.02E-05 | 0.00023  | 515 | 515 |
| XKR4      | 0.177686 | 5.02E-05 | 0.000229 | 515 | 363 |
| KIRREL3   | 0.177688 | 5.02E-05 | 0.000229 | 515 | 469 |
| HAS2AS    | 0.177706 | 5.01E-05 | 0.000229 | 515 | 481 |
| MN1       | 0.17773  | 4.99E-05 | 0.000229 | 515 | 515 |
| ATP6VOD1  | 0.17775  | 4.98E-05 | 0.000228 | 515 | 515 |
| IL17REL   | 0.177862 | 4.93E-05 | 0.000226 | 515 | 480 |
| GDI2      | 0.177907 | 4.91E-05 | 0.000225 | 515 | 515 |
| HHIP      | 0.177922 | 4.90E-05 | 0.000225 | 515 | 490 |
| C20orf26  | 0.177976 | 4.87E-05 | 0.000224 | 515 | 500 |
| TMEM217   | 0.177981 | 4.87E-05 | 0.000223 | 515 | 515 |
| ZNF132    | 0.177983 | 4.87E-05 | 0.000223 | 515 | 515 |
| RAP2A     | 0.178001 | 4.86E-05 | 0.000223 | 515 | 515 |
| LOC284233 | 0.178002 | 4.86E-05 | 0.000223 | 515 | 494 |
| ACAD11    | 0.178014 | 4.86E-05 | 0.000223 | 515 | 515 |
| CADPS     | 0.178095 | 4.82E-05 | 0.000221 | 515 | 494 |
| LMOD1     | 0.178124 | 4.80E-05 | 0.000221 | 515 | 515 |
| RCVRN     | 0.178154 | 4.79E-05 | 0.00022  | 515 | 368 |
| MEP1A     | 0.178187 | 4.77E-05 | 0.00022  | 515 | 485 |
| XKR6      | 0.178272 | 4.73E-05 | 0.000218 | 515 | 494 |
| STAG3     | 0.178314 | 4.71E-05 | 0.000217 | 515 | 515 |
| TACR1     | 0.17835  | 4.70E-05 | 0.000217 | 515 | 512 |
| MRC2      | 0.17842  | 4.66E-05 | 0.000215 | 515 | 515 |
| PADI4     | 0.178436 | 4.66E-05 | 0.000215 | 515 | 460 |
| MYH6      | 0.178491 | 4.63E-05 | 0.000214 | 515 | 271 |
| FAM105B   | 0.178513 | 4.62E-05 | 0.000213 | 515 | 515 |
| IL1R2     | 0.178532 | 4.61E-05 | 0.000213 | 515 | 515 |
| C1orf190  | 0.178544 | 4.61E-05 | 0.000213 | 515 | 514 |
| OR2A1     | 0.178562 | 4.60E-05 | 0.000213 | 515 | 485 |
| DCLK1     | 0.178565 | 4.60E-05 | 0.000213 | 515 | 515 |
| KCNH3     | 0.178663 | 4.55E-05 | 0.000211 | 515 | 509 |
| GPR97     | 0.178687 | 4.54E-05 | 0.00021  | 515 | 514 |
| MCART2    | 0.178762 | 4.51E-05 | 0.000209 | 515 | 513 |
| MAT1A     | 0.178805 | 4.49E-05 | 0.000208 | 515 | 501 |
| HSPA13    | 0.178848 | 4.47E-05 | 0.000207 | 515 | 515 |
| C11orf88  | 0.178903 | 4.44E-05 | 0.000206 | 515 | 471 |
| FGF20     | 0.17892  | 4.44E-05 | 0.000206 | 515 | 324 |
| BTG2      | 0.179072 | 4.37E-05 | 0.000203 | 515 | 515 |
| ZPLD1     | 0.179089 | 4.36E-05 | 0.000203 | 515 | 461 |
| ZNF845    | 0.179115 | 4.35E-05 | 0.000202 | 515 | 515 |
| DBNL      | 0.179117 | 4.35E-05 | 0.000202 | 515 | 515 |
| PROCR     | 0.179131 | 4.34E-05 | 0.000202 | 515 | 515 |
| LBX1      | 0.179231 | 4.30E-05 | 0.0002   | 515 | 293 |

|           |          |          |          |     |     |
|-----------|----------|----------|----------|-----|-----|
| IL31RA    | 0.179248 | 4.29E-05 | 0.0002   | 515 | 487 |
| RELN      | 0.17925  | 4.29E-05 | 0.0002   | 515 | 513 |
| CNTNAP3   | 0.179383 | 4.24E-05 | 0.000197 | 515 | 506 |
| ZHX2      | 0.179391 | 4.23E-05 | 0.000197 | 515 | 515 |
| RBL1      | 0.179405 | 4.23E-05 | 0.000197 | 515 | 515 |
| SOD3      | 0.179413 | 4.22E-05 | 0.000197 | 515 | 515 |
| TSGA10IP  | 0.179421 | 4.22E-05 | 0.000197 | 515 | 367 |
| GHRLOS    | 0.179439 | 4.21E-05 | 0.000197 | 515 | 512 |
| ZNF844    | 0.179487 | 4.19E-05 | 0.000196 | 515 | 515 |
| IFITM3    | 0.179498 | 4.19E-05 | 0.000196 | 515 | 515 |
| ZFP90     | 0.179507 | 4.18E-05 | 0.000195 | 515 | 515 |
| DBC1      | 0.179519 | 4.18E-05 | 0.000195 | 515 | 491 |
| GJA3      | 0.179551 | 4.17E-05 | 0.000195 | 515 | 477 |
| C6orf114  | 0.179566 | 4.16E-05 | 0.000194 | 515 | 512 |
| AMFR      | 0.179574 | 4.16E-05 | 0.000194 | 515 | 515 |
| KCNN4     | 0.179624 | 4.14E-05 | 0.000193 | 515 | 515 |
| TOR1B     | 0.179641 | 4.13E-05 | 0.000193 | 515 | 515 |
| SEMA6B    | 0.179675 | 4.11E-05 | 0.000193 | 515 | 515 |
| GPRASP1   | 0.179675 | 4.11E-05 | 0.000193 | 515 | 515 |
| BTBD19    | 0.179711 | 4.10E-05 | 0.000192 | 515 | 513 |
| PHF21A    | 0.179716 | 4.10E-05 | 0.000192 | 515 | 515 |
| MT1L      | 0.179804 | 4.06E-05 | 0.00019  | 515 | 515 |
| C3orf54   | 0.179842 | 4.05E-05 | 0.00019  | 515 | 515 |
| KRT79     | 0.179853 | 4.04E-05 | 0.00019  | 515 | 379 |
| ITGA2     | 0.179918 | 4.01E-05 | 0.000189 | 515 | 515 |
| ANO5      | 0.180146 | 3.92E-05 | 0.000185 | 515 | 512 |
| ZFX       | 0.180209 | 3.90E-05 | 0.000184 | 515 | 515 |
| MADCAM1   | 0.180259 | 3.88E-05 | 0.000183 | 515 | 466 |
| C9orf156  | 0.18029  | 3.87E-05 | 0.000182 | 515 | 515 |
| PICALM    | 0.180308 | 3.86E-05 | 0.000182 | 515 | 515 |
| CYP4F12   | 0.180363 | 3.84E-05 | 0.000181 | 515 | 484 |
| STYX      | 0.180392 | 3.83E-05 | 0.000181 | 515 | 515 |
| AHR       | 0.180414 | 3.82E-05 | 0.00018  | 515 | 515 |
| CDKL1     | 0.180436 | 3.81E-05 | 0.00018  | 515 | 515 |
| ZNF799    | 0.180445 | 3.81E-05 | 0.00018  | 515 | 515 |
| GUCY1A2   | 0.180501 | 3.79E-05 | 0.000179 | 515 | 515 |
| MAP3K7    | 0.18051  | 3.78E-05 | 0.000179 | 515 | 515 |
| FAM153A   | 0.180724 | 3.70E-05 | 0.000175 | 515 | 472 |
| YWHAH     | 0.180743 | 3.69E-05 | 0.000175 | 515 | 515 |
| ORAI2     | 0.180776 | 3.68E-05 | 0.000174 | 515 | 515 |
| BRCA2     | 0.180802 | 3.67E-05 | 0.000174 | 515 | 515 |
| SHCBP1    | 0.180813 | 3.67E-05 | 0.000174 | 515 | 515 |
| HTR2A     | 0.180829 | 3.66E-05 | 0.000174 | 515 | 482 |
| SOX5      | 0.18087  | 3.65E-05 | 0.000173 | 515 | 509 |
| ANO1      | 0.180905 | 3.64E-05 | 0.000173 | 515 | 515 |
| ZNF257    | 0.180968 | 3.61E-05 | 0.000172 | 515 | 512 |
| TMEM132C  | 0.18101  | 3.60E-05 | 0.000171 | 515 | 408 |
| GMFB      | 0.181045 | 3.58E-05 | 0.00017  | 515 | 515 |
| NCRNA0015 | 0.181359 | 3.47E-05 | 0.000165 | 515 | 515 |
| CBX6      | 0.18136  | 3.47E-05 | 0.000165 | 515 | 515 |
| SLC32A1   | 0.18136  | 3.47E-05 | 0.000165 | 515 | 149 |
| MYL12A    | 0.181453 | 3.44E-05 | 0.000164 | 515 | 515 |
| SYNJ1     | 0.181489 | 3.43E-05 | 0.000163 | 515 | 515 |
| SPATA13   | 0.181519 | 3.42E-05 | 0.000163 | 515 | 515 |

|           |          |          |          |     |     |
|-----------|----------|----------|----------|-----|-----|
| C4orf3    | 0.181549 | 3.41E-05 | 0.000162 | 515 | 515 |
| LRR3      | 0.181565 | 3.40E-05 | 0.000162 | 515 | 515 |
| MXD1      | 0.181572 | 3.40E-05 | 0.000162 | 515 | 515 |
| BGN       | 0.181595 | 3.39E-05 | 0.000162 | 515 | 515 |
| PLIN2     | 0.181643 | 3.37E-05 | 0.000161 | 515 | 515 |
| SEPT11    | 0.181678 | 3.36E-05 | 0.00016  | 515 | 515 |
| KCNK6     | 0.181722 | 3.35E-05 | 0.00016  | 515 | 515 |
| CLIP2     | 0.181819 | 3.31E-05 | 0.000158 | 515 | 515 |
| MYO3B     | 0.181842 | 3.31E-05 | 0.000158 | 515 | 495 |
| OVCH1     | 0.181847 | 3.30E-05 | 0.000158 | 515 | 311 |
| DPY19L2P2 | 0.18186  | 3.30E-05 | 0.000158 | 515 | 514 |
| EGR1      | 0.181866 | 3.30E-05 | 0.000158 | 515 | 515 |
| THAP6     | 0.18189  | 3.29E-05 | 0.000157 | 515 | 515 |
| L3MBTL3   | 0.181904 | 3.29E-05 | 0.000157 | 515 | 515 |
| C14orf149 | 0.182021 | 3.25E-05 | 0.000155 | 515 | 515 |
| ZNF660    | 0.182087 | 3.22E-05 | 0.000155 | 515 | 508 |
| MMP13     | 0.182128 | 3.21E-05 | 0.000154 | 515 | 512 |
| RCHY1     | 0.18218  | 3.19E-05 | 0.000153 | 515 | 515 |
| CTSH      | 0.182191 | 3.19E-05 | 0.000153 | 515 | 515 |
| MYH2      | 0.182226 | 3.18E-05 | 0.000153 | 515 | 333 |
| C20orf107 | 0.182282 | 3.16E-05 | 0.000152 | 515 | 475 |
| CACNG6    | 0.182296 | 3.16E-05 | 0.000152 | 515 | 432 |
| ASTE1     | 0.182296 | 3.16E-05 | 0.000152 | 515 | 515 |
| TRIM25    | 0.182304 | 3.15E-05 | 0.000152 | 515 | 515 |
| SLC12A5   | 0.182336 | 3.14E-05 | 0.000151 | 515 | 503 |
| KIRREL2   | 0.182376 | 3.13E-05 | 0.000151 | 515 | 462 |
| MAS1L     | 0.182393 | 3.13E-05 | 0.00015  | 515 | 173 |
| FOXO1     | 0.182394 | 3.13E-05 | 0.00015  | 515 | 515 |
| C6orf155  | 0.182444 | 3.11E-05 | 0.00015  | 515 | 508 |
| MEF2A     | 0.182565 | 3.07E-05 | 0.000148 | 515 | 515 |
| GNG12     | 0.182591 | 3.06E-05 | 0.000147 | 515 | 515 |
| AMIGO2    | 0.182658 | 3.04E-05 | 0.000147 | 515 | 515 |
| PGM5      | 0.182684 | 3.03E-05 | 0.000146 | 515 | 515 |
| APLNR     | 0.182771 | 3.01E-05 | 0.000145 | 515 | 515 |
| RNF14     | 0.182947 | 2.95E-05 | 0.000143 | 515 | 515 |
| CDV3      | 0.182949 | 2.95E-05 | 0.000143 | 515 | 515 |
| DIRC3     | 0.182972 | 2.95E-05 | 0.000142 | 515 | 503 |
| RP1       | 0.182973 | 2.95E-05 | 0.000142 | 515 | 501 |
| TRIM23    | 0.182999 | 2.94E-05 | 0.000142 | 515 | 515 |
| FAM122C   | 0.183118 | 2.90E-05 | 0.00014  | 515 | 515 |
| UIMC1     | 0.183154 | 2.89E-05 | 0.00014  | 515 | 515 |
| TEP1      | 0.183194 | 2.88E-05 | 0.000139 | 515 | 515 |
| PRKCDBP   | 0.183218 | 2.87E-05 | 0.000139 | 515 | 515 |
| RASAL2    | 0.183321 | 2.84E-05 | 0.000138 | 515 | 515 |
| GJA4      | 0.183363 | 2.83E-05 | 0.000137 | 515 | 515 |
| ATP2C1    | 0.183392 | 2.82E-05 | 0.000137 | 515 | 515 |
| FAM135A   | 0.183497 | 2.79E-05 | 0.000135 | 515 | 515 |
| GPR88     | 0.183524 | 2.79E-05 | 0.000135 | 515 | 499 |
| NKD2      | 0.183539 | 2.78E-05 | 0.000135 | 515 | 515 |
| C16orf5   | 0.183544 | 2.78E-05 | 0.000135 | 515 | 515 |
| PPM1F     | 0.183563 | 2.77E-05 | 0.000135 | 515 | 515 |
| NCS1      | 0.183703 | 2.73E-05 | 0.000133 | 515 | 515 |
| BACH1     | 0.183861 | 2.69E-05 | 0.000131 | 515 | 515 |
| PSIP1     | 0.183905 | 2.68E-05 | 0.00013  | 515 | 515 |



|           |          |          |          |     |     |
|-----------|----------|----------|----------|-----|-----|
| OSBPL6    | 0.183925 | 2.67E-05 | 0.00013  | 515 | 515 |
| IL17RA    | 0.183958 | 2.66E-05 | 0.00013  | 515 | 515 |
| ADCY3     | 0.183978 | 2.66E-05 | 0.000129 | 515 | 515 |
| ATP8B3    | 0.184012 | 2.65E-05 | 0.000129 | 515 | 515 |
| PPFIA2    | 0.184058 | 2.64E-05 | 0.000129 | 515 | 496 |
| GATA1     | 0.184108 | 2.62E-05 | 0.000128 | 515 | 449 |
| AGRP      | 0.184113 | 2.62E-05 | 0.000128 | 515 | 449 |
| ARHGAP28  | 0.184138 | 2.62E-05 | 0.000128 | 515 | 515 |
| WIT1      | 0.184272 | 2.58E-05 | 0.000126 | 515 | 358 |
| NTNG1     | 0.184317 | 2.57E-05 | 0.000125 | 515 | 495 |
| THBS4     | 0.184493 | 2.52E-05 | 0.000123 | 515 | 514 |
| BCO2      | 0.184551 | 2.51E-05 | 0.000123 | 515 | 515 |
| AGBL3     | 0.184563 | 2.50E-05 | 0.000123 | 515 | 509 |
| NGLY1     | 0.184582 | 2.50E-05 | 0.000122 | 515 | 515 |
| TSC22D3   | 0.184697 | 2.47E-05 | 0.000121 | 515 | 515 |
| ARL13B    | 0.184704 | 2.47E-05 | 0.000121 | 515 | 515 |
| NOTCH2    | 0.184796 | 2.44E-05 | 0.00012  | 515 | 515 |
| UBE2A     | 0.184865 | 2.43E-05 | 0.000119 | 515 | 515 |
| MAP3K12   | 0.18491  | 2.42E-05 | 0.000119 | 515 | 515 |
| GJB2      | 0.184916 | 2.41E-05 | 0.000119 | 515 | 515 |
| OSBPL3    | 0.184937 | 2.41E-05 | 0.000118 | 515 | 515 |
| C6orf115  | 0.184959 | 2.40E-05 | 0.000118 | 515 | 515 |
| CAPZA2    | 0.18496  | 2.40E-05 | 0.000118 | 515 | 515 |
| CCDC18    | 0.184985 | 2.40E-05 | 0.000118 | 515 | 515 |
| PLAC9     | 0.185007 | 2.39E-05 | 0.000118 | 515 | 514 |
| PLTP      | 0.185024 | 2.39E-05 | 0.000118 | 515 | 515 |
| NINJ1     | 0.18503  | 2.39E-05 | 0.000117 | 515 | 515 |
| BICD2     | 0.185117 | 2.36E-05 | 0.000116 | 515 | 515 |
| MUSTN1    | 0.185202 | 2.34E-05 | 0.000116 | 515 | 514 |
| SLITRK4   | 0.18523  | 2.34E-05 | 0.000115 | 515 | 507 |
| GPR19     | 0.185242 | 2.33E-05 | 0.000115 | 515 | 514 |
| SEMA3A    | 0.185265 | 2.33E-05 | 0.000115 | 515 | 515 |
| LCN10     | 0.185274 | 2.33E-05 | 0.000115 | 515 | 508 |
| LOC284441 | 0.185302 | 2.32E-05 | 0.000115 | 515 | 515 |
| CA5B      | 0.185333 | 2.31E-05 | 0.000114 | 515 | 515 |
| ZNF780B   | 0.185371 | 2.30E-05 | 0.000114 | 515 | 515 |
| TTBK1     | 0.185392 | 2.30E-05 | 0.000114 | 515 | 508 |
| RSPH4A    | 0.185438 | 2.29E-05 | 0.000113 | 515 | 513 |
| B3GAT1    | 0.185481 | 2.28E-05 | 0.000113 | 515 | 515 |
| UBE2B     | 0.185496 | 2.27E-05 | 0.000112 | 515 | 515 |
| FER1L4    | 0.185503 | 2.27E-05 | 0.000112 | 515 | 515 |
| DRAM1     | 0.185508 | 2.27E-05 | 0.000112 | 515 | 515 |
| RBMS1     | 0.185527 | 2.27E-05 | 0.000112 | 515 | 515 |
| HIVEP2    | 0.185683 | 2.23E-05 | 0.000111 | 515 | 515 |
| C7orf31   | 0.185722 | 2.22E-05 | 0.00011  | 515 | 515 |
| SMCHD1    | 0.185758 | 2.21E-05 | 0.00011  | 515 | 515 |
| FEZ2      | 0.185786 | 2.21E-05 | 0.00011  | 515 | 515 |
| PQLC3     | 0.185811 | 2.20E-05 | 0.000109 | 515 | 515 |
| RWDD1     | 0.185812 | 2.20E-05 | 0.000109 | 515 | 515 |
| C10orf67  | 0.185826 | 2.20E-05 | 0.000109 | 515 | 423 |
| LOC647121 | 0.185922 | 2.18E-05 | 0.000108 | 515 | 515 |
| RAD51L3   | 0.18598  | 2.16E-05 | 0.000108 | 515 | 515 |
| BTNL2     | 0.185984 | 2.16E-05 | 0.000108 | 515 | 187 |
| REN       | 0.186007 | 2.16E-05 | 0.000107 | 515 | 475 |

|           |          |          |          |     |     |
|-----------|----------|----------|----------|-----|-----|
| 2-Mar     | 0.186042 | 2.15E-05 | 0.000107 | 515 | 515 |
| LOXL1     | 0.186054 | 2.15E-05 | 0.000107 | 515 | 515 |
| OR5K2     | 0.186064 | 2.14E-05 | 0.000107 | 515 | 288 |
| CTNNAL1   | 0.186127 | 2.13E-05 | 0.000106 | 515 | 515 |
| FAM162B   | 0.186142 | 2.13E-05 | 0.000106 | 515 | 515 |
| SMARCA2   | 0.186161 | 2.12E-05 | 0.000106 | 515 | 515 |
| ARHGEF15  | 0.18627  | 2.10E-05 | 0.000105 | 515 | 515 |
| LGALS3    | 0.186361 | 2.08E-05 | 0.000104 | 515 | 515 |
| DPP4      | 0.186367 | 2.08E-05 | 0.000104 | 515 | 515 |
| C10orf26  | 0.186384 | 2.07E-05 | 0.000104 | 515 | 515 |
| UNC5A     | 0.186398 | 2.07E-05 | 0.000103 | 515 | 509 |
| PRDM6     | 0.186455 | 2.06E-05 | 0.000103 | 515 | 515 |
| RANBP3L   | 0.186509 | 2.05E-05 | 0.000102 | 515 | 494 |
| RSP03     | 0.186521 | 2.04E-05 | 0.000102 | 515 | 515 |
| ALDH1L2   | 0.186583 | 2.03E-05 | 0.000102 | 515 | 515 |
| CST6      | 0.186672 | 2.01E-05 | 0.000101 | 515 | 514 |
| DENND4C   | 0.18671  | 2.00E-05 | 0.0001   | 515 | 515 |
| PMFBP1    | 0.18681  | 1.98E-05 | 9.94E-05 | 515 | 508 |
| PPAP2B    | 0.18683  | 1.98E-05 | 9.92E-05 | 515 | 515 |
| METRNL    | 0.186894 | 1.97E-05 | 9.86E-05 | 515 | 515 |
| TG        | 0.186954 | 1.95E-05 | 9.81E-05 | 515 | 512 |
| SEC31B    | 0.186971 | 1.95E-05 | 9.79E-05 | 515 | 515 |
| FAM102A   | 0.186991 | 1.95E-05 | 9.77E-05 | 515 | 515 |
| PKIG      | 0.187024 | 1.94E-05 | 9.74E-05 | 515 | 515 |
| ZSWIM6    | 0.187116 | 1.92E-05 | 9.66E-05 | 515 | 515 |
| FBXW7     | 0.187127 | 1.92E-05 | 9.65E-05 | 515 | 515 |
| BEAN      | 0.187129 | 1.92E-05 | 9.65E-05 | 515 | 515 |
| COL23A1   | 0.187178 | 1.91E-05 | 9.61E-05 | 515 | 514 |
| TIE1      | 0.18726  | 1.89E-05 | 9.53E-05 | 515 | 515 |
| ZNF469    | 0.18728  | 1.89E-05 | 9.52E-05 | 515 | 515 |
| SAT1      | 0.187297 | 1.89E-05 | 9.50E-05 | 515 | 515 |
| PKD1L3    | 0.187297 | 1.89E-05 | 9.50E-05 | 515 | 414 |
| CENPC1    | 0.187494 | 1.85E-05 | 9.32E-05 | 515 | 515 |
| HOXB4     | 0.187533 | 1.84E-05 | 9.29E-05 | 515 | 515 |
| RHOA      | 0.187559 | 1.83E-05 | 9.27E-05 | 515 | 515 |
| RNF122    | 0.187629 | 1.82E-05 | 9.20E-05 | 515 | 515 |
| CTHRC1    | 0.187694 | 1.81E-05 | 9.14E-05 | 515 | 515 |
| RALGPS2   | 0.187781 | 1.79E-05 | 9.07E-05 | 515 | 515 |
| ADAM33    | 0.187797 | 1.79E-05 | 9.05E-05 | 515 | 515 |
| AGER      | 0.187901 | 1.77E-05 | 8.96E-05 | 515 | 515 |
| KCTD10    | 0.187906 | 1.77E-05 | 8.96E-05 | 515 | 515 |
| SPOP      | 0.187952 | 1.76E-05 | 8.92E-05 | 515 | 515 |
| SLC22A16  | 0.187981 | 1.76E-05 | 8.90E-05 | 515 | 452 |
| ZNF17     | 0.18804  | 1.74E-05 | 8.85E-05 | 515 | 515 |
| LOC100130 | 0.188041 | 1.74E-05 | 8.85E-05 | 515 | 515 |
| ZNF708    | 0.188069 | 1.74E-05 | 8.82E-05 | 515 | 515 |
| CHRN3     | 0.188073 | 1.74E-05 | 8.82E-05 | 515 | 154 |
| OGN       | 0.18813  | 1.73E-05 | 8.77E-05 | 515 | 513 |
| MYBPH     | 0.188214 | 1.71E-05 | 8.70E-05 | 515 | 481 |
| CCDC42    | 0.188254 | 1.71E-05 | 8.66E-05 | 515 | 336 |
| C11orf82  | 0.188262 | 1.70E-05 | 8.66E-05 | 515 | 515 |
| SOX7      | 0.188374 | 1.68E-05 | 8.57E-05 | 515 | 515 |
| TOR1A     | 0.188374 | 1.68E-05 | 8.57E-05 | 515 | 515 |
| CGRRF1    | 0.18844  | 1.67E-05 | 8.51E-05 | 515 | 515 |

|           |          |          |          |     |     |
|-----------|----------|----------|----------|-----|-----|
| C6orf72   | 0.18844  | 1.67E-05 | 8.51E-05 | 515 | 515 |
| FBXL7     | 0.188562 | 1.65E-05 | 8.42E-05 | 515 | 515 |
| PDYN      | 0.188706 | 1.63E-05 | 8.29E-05 | 515 | 184 |
| RCAN1     | 0.188731 | 1.62E-05 | 8.27E-05 | 515 | 515 |
| SYTL2     | 0.188798 | 1.61E-05 | 8.22E-05 | 515 | 515 |
| NEK1      | 0.188872 | 1.60E-05 | 8.16E-05 | 515 | 515 |
| EPM2A     | 0.188995 | 1.58E-05 | 8.06E-05 | 515 | 515 |
| TRIM59    | 0.189066 | 1.57E-05 | 8.00E-05 | 515 | 515 |
| FZD2      | 0.189143 | 1.55E-05 | 7.95E-05 | 515 | 515 |
| C3orf34   | 0.189177 | 1.55E-05 | 7.93E-05 | 515 | 515 |
| GALC      | 0.189224 | 1.54E-05 | 7.89E-05 | 515 | 515 |
| C14orf28  | 0.189289 | 1.53E-05 | 7.84E-05 | 515 | 515 |
| ANGPT1    | 0.189304 | 1.53E-05 | 7.83E-05 | 515 | 515 |
| NFASC     | 0.189329 | 1.52E-05 | 7.82E-05 | 515 | 515 |
| SEMA3C    | 0.189337 | 1.52E-05 | 7.81E-05 | 515 | 515 |
| N4BP1     | 0.189366 | 1.52E-05 | 7.79E-05 | 515 | 515 |
| SPTLC3    | 0.189413 | 1.51E-05 | 7.75E-05 | 515 | 515 |
| C8orf46   | 0.189535 | 1.49E-05 | 7.66E-05 | 515 | 506 |
| TMEM47    | 0.189609 | 1.48E-05 | 7.61E-05 | 515 | 515 |
| ASAP1     | 0.189626 | 1.48E-05 | 7.59E-05 | 515 | 515 |
| ZNF416    | 0.189633 | 1.48E-05 | 7.59E-05 | 515 | 515 |
| CCDC111   | 0.189677 | 1.47E-05 | 7.56E-05 | 515 | 515 |
| MAML2     | 0.189684 | 1.47E-05 | 7.56E-05 | 515 | 515 |
| NTN4      | 0.189704 | 1.46E-05 | 7.54E-05 | 515 | 515 |
| HSPA12B   | 0.189756 | 1.46E-05 | 7.50E-05 | 515 | 515 |
| PCOLCE    | 0.189778 | 1.45E-05 | 7.49E-05 | 515 | 515 |
| TMEM49    | 0.189845 | 1.44E-05 | 7.44E-05 | 515 | 515 |
| GPX8      | 0.189885 | 1.44E-05 | 7.41E-05 | 515 | 515 |
| ZNF304    | 0.189937 | 1.43E-05 | 7.37E-05 | 515 | 515 |
| TRPC1     | 0.189997 | 1.42E-05 | 7.33E-05 | 515 | 515 |
| TGM4      | 0.190006 | 1.42E-05 | 7.33E-05 | 515 | 369 |
| FCH01     | 0.190081 | 1.41E-05 | 7.27E-05 | 515 | 515 |
| WDR7      | 0.190141 | 1.40E-05 | 7.23E-05 | 515 | 515 |
| CD109     | 0.190207 | 1.39E-05 | 7.18E-05 | 515 | 515 |
| RSPO4     | 0.190284 | 1.38E-05 | 7.13E-05 | 515 | 507 |
| UBA3      | 0.190299 | 1.37E-05 | 7.12E-05 | 515 | 515 |
| BCL6B     | 0.190322 | 1.37E-05 | 7.10E-05 | 515 | 515 |
| C20orf103 | 0.190332 | 1.37E-05 | 7.10E-05 | 515 | 515 |
| FKBP5     | 0.1904   | 1.36E-05 | 7.06E-05 | 515 | 515 |
| GLT25D1   | 0.190416 | 1.36E-05 | 7.05E-05 | 515 | 515 |
| LOC145820 | 0.190499 | 1.35E-05 | 6.99E-05 | 515 | 504 |
| SERINC1   | 0.190503 | 1.35E-05 | 6.99E-05 | 515 | 515 |
| ESR2      | 0.190517 | 1.34E-05 | 6.98E-05 | 515 | 514 |
| CXorf36   | 0.190533 | 1.34E-05 | 6.97E-05 | 515 | 515 |
| MCC       | 0.190555 | 1.34E-05 | 6.96E-05 | 515 | 515 |
| COL4A3BP  | 0.190582 | 1.33E-05 | 6.94E-05 | 515 | 515 |
| ETV1      | 0.190677 | 1.32E-05 | 6.87E-05 | 515 | 515 |
| SLC6A14   | 0.190749 | 1.31E-05 | 6.82E-05 | 515 | 514 |
| TSPAN19   | 0.190794 | 1.30E-05 | 6.79E-05 | 515 | 334 |
| FAM107A   | 0.190995 | 1.28E-05 | 6.65E-05 | 515 | 515 |
| QRSL1     | 0.19111  | 1.26E-05 | 6.58E-05 | 515 | 515 |
| GPR113    | 0.191211 | 1.25E-05 | 6.51E-05 | 515 | 513 |
| LPAL2     | 0.191284 | 1.24E-05 | 6.47E-05 | 515 | 488 |
| FSTL1     | 0.191323 | 1.23E-05 | 6.44E-05 | 515 | 515 |

|           |          |          |          |     |     |
|-----------|----------|----------|----------|-----|-----|
| KYNU      | 0.191373 | 1.23E-05 | 6.41E-05 | 515 | 515 |
| CHRNA1    | 0.191385 | 1.22E-05 | 6.41E-05 | 515 | 512 |
| KRT5      | 0.191432 | 1.22E-05 | 6.38E-05 | 515 | 509 |
| FXYD1     | 0.191455 | 1.22E-05 | 6.36E-05 | 515 | 501 |
| MANBA     | 0.191515 | 1.21E-05 | 6.32E-05 | 515 | 515 |
| ZBTB47    | 0.19152  | 1.21E-05 | 6.32E-05 | 515 | 515 |
| MYL3      | 0.191525 | 1.21E-05 | 6.32E-05 | 515 | 451 |
| SPRR2D    | 0.191536 | 1.21E-05 | 6.32E-05 | 515 | 386 |
| DHH       | 0.191552 | 1.20E-05 | 6.31E-05 | 515 | 494 |
| FOXD4L3   | 0.191597 | 1.20E-05 | 6.28E-05 | 515 | 194 |
| PCBP3     | 0.191619 | 1.19E-05 | 6.26E-05 | 515 | 515 |
| TRPA1     | 0.191638 | 1.19E-05 | 6.25E-05 | 515 | 470 |
| RASSF3    | 0.191682 | 1.19E-05 | 6.23E-05 | 515 | 515 |
| FAM153B   | 0.191727 | 1.18E-05 | 6.20E-05 | 515 | 373 |
| IFNAR1    | 0.191748 | 1.18E-05 | 6.19E-05 | 515 | 515 |
| CCR3      | 0.191855 | 1.16E-05 | 6.12E-05 | 515 | 500 |
| ZNF230    | 0.191862 | 1.16E-05 | 6.12E-05 | 515 | 515 |
| C3orf17   | 0.191933 | 1.16E-05 | 6.08E-05 | 515 | 515 |
| LOC595101 | 0.191955 | 1.15E-05 | 6.06E-05 | 515 | 515 |
| PDGFRB    | 0.191976 | 1.15E-05 | 6.05E-05 | 515 | 515 |
| ANGPTL5   | 0.192007 | 1.15E-05 | 6.03E-05 | 515 | 413 |
| SPIC      | 0.192138 | 1.13E-05 | 5.95E-05 | 515 | 230 |
| CD36      | 0.192151 | 1.13E-05 | 5.95E-05 | 515 | 515 |
| FHOD3     | 0.192329 | 1.11E-05 | 5.84E-05 | 515 | 515 |
| HOXA5     | 0.192338 | 1.11E-05 | 5.84E-05 | 515 | 515 |
| PEPD      | 0.192596 | 1.08E-05 | 5.69E-05 | 515 | 515 |
| TRIM36    | 0.192683 | 1.07E-05 | 5.64E-05 | 515 | 515 |
| FAM196B   | 0.192722 | 1.06E-05 | 5.62E-05 | 515 | 473 |
| PLGLB2    | 0.192736 | 1.06E-05 | 5.61E-05 | 515 | 515 |
| GTSF1     | 0.192774 | 1.06E-05 | 5.59E-05 | 515 | 488 |
| RAB27A    | 0.19279  | 1.05E-05 | 5.58E-05 | 515 | 515 |
| PPIP5K2   | 0.192799 | 1.05E-05 | 5.58E-05 | 515 | 515 |
| CHST13    | 0.192859 | 1.05E-05 | 5.54E-05 | 515 | 509 |
| IVL       | 0.192887 | 1.04E-05 | 5.53E-05 | 515 | 451 |
| CEACAM1   | 0.192933 | 1.04E-05 | 5.51E-05 | 515 | 515 |
| POMC      | 0.192956 | 1.04E-05 | 5.49E-05 | 515 | 513 |
| CAMK1D    | 0.192969 | 1.03E-05 | 5.49E-05 | 515 | 515 |
| ARPC5     | 0.19298  | 1.03E-05 | 5.48E-05 | 515 | 515 |
| TMEM22    | 0.192989 | 1.03E-05 | 5.48E-05 | 515 | 515 |
| ERMAP     | 0.193029 | 1.03E-05 | 5.46E-05 | 515 | 515 |
| MET       | 0.193177 | 1.01E-05 | 5.37E-05 | 515 | 515 |
| KATNA1    | 0.193381 | 9.89E-06 | 5.26E-05 | 515 | 515 |
| SLC9A6    | 0.193391 | 9.88E-06 | 5.26E-05 | 515 | 515 |
| GRK5      | 0.193423 | 9.84E-06 | 5.24E-05 | 515 | 515 |
| NHLRC3    | 0.193548 | 9.71E-06 | 5.18E-05 | 515 | 515 |
| THBS1     | 0.193631 | 9.62E-06 | 5.13E-05 | 515 | 515 |
| CYBRD1    | 0.193644 | 9.61E-06 | 5.13E-05 | 515 | 515 |
| TIMP3     | 0.193678 | 9.57E-06 | 5.11E-05 | 515 | 515 |
| TOX       | 0.193689 | 9.56E-06 | 5.11E-05 | 515 | 515 |
| RAET1K    | 0.193768 | 9.48E-06 | 5.06E-05 | 515 | 497 |
| SNAP23    | 0.193884 | 9.36E-06 | 5.01E-05 | 515 | 515 |
| PEX3      | 0.19398  | 9.27E-06 | 4.96E-05 | 515 | 515 |
| TGM5      | 0.194017 | 9.23E-06 | 4.94E-05 | 515 | 373 |
| HOXA1     | 0.194071 | 9.18E-06 | 4.91E-05 | 515 | 514 |

|           |          |          |          |     |     |
|-----------|----------|----------|----------|-----|-----|
| NT5E      | 0.194142 | 9.11E-06 | 4.88E-05 | 515 | 515 |
| DST       | 0.194205 | 9.04E-06 | 4.84E-05 | 515 | 515 |
| MEIS1     | 0.194212 | 9.04E-06 | 4.84E-05 | 515 | 515 |
| RND3      | 0.194221 | 9.03E-06 | 4.84E-05 | 515 | 515 |
| CFD       | 0.194291 | 8.96E-06 | 4.80E-05 | 515 | 515 |
| CLEC14A   | 0.194317 | 8.94E-06 | 4.79E-05 | 515 | 515 |
| ASGR1     | 0.194318 | 8.93E-06 | 4.79E-05 | 515 | 515 |
| MYF6      | 0.194332 | 8.92E-06 | 4.79E-05 | 515 | 187 |
| C1orf173  | 0.194333 | 8.92E-06 | 4.79E-05 | 515 | 481 |
| HSD3B7    | 0.194351 | 8.90E-06 | 4.78E-05 | 515 | 515 |
| CNR1      | 0.194371 | 8.88E-06 | 4.77E-05 | 515 | 513 |
| ENKUR     | 0.194389 | 8.87E-06 | 4.77E-05 | 515 | 510 |
| ABCA8     | 0.194473 | 8.79E-06 | 4.72E-05 | 515 | 513 |
| KCNA5     | 0.194491 | 8.77E-06 | 4.72E-05 | 515 | 508 |
| CRTAP     | 0.194505 | 8.76E-06 | 4.71E-05 | 515 | 515 |
| RGS4      | 0.194572 | 8.69E-06 | 4.68E-05 | 515 | 515 |
| OR56B1    | 0.194585 | 8.68E-06 | 4.68E-05 | 515 | 202 |
| CAB39     | 0.194613 | 8.65E-06 | 4.66E-05 | 515 | 515 |
| C6orf186  | 0.194649 | 8.62E-06 | 4.65E-05 | 515 | 474 |
| DNAJB5    | 0.194686 | 8.59E-06 | 4.63E-05 | 515 | 515 |
| ITGA5     | 0.194815 | 8.47E-06 | 4.57E-05 | 515 | 515 |
| FAM13C    | 0.194952 | 8.34E-06 | 4.50E-05 | 515 | 515 |
| CLEC11A   | 0.195002 | 8.30E-06 | 4.48E-05 | 515 | 515 |
| CD47      | 0.195018 | 8.28E-06 | 4.48E-05 | 515 | 515 |
| ACVR1C    | 0.195035 | 8.27E-06 | 4.47E-05 | 515 | 513 |
| KLF1      | 0.195081 | 8.22E-06 | 4.45E-05 | 515 | 467 |
| OR3A2     | 0.195135 | 8.18E-06 | 4.43E-05 | 515 | 239 |
| GPR150    | 0.195161 | 8.15E-06 | 4.42E-05 | 515 | 354 |
| CCDC28B   | 0.195272 | 8.06E-06 | 4.37E-05 | 515 | 515 |
| TFRC      | 0.195329 | 8.01E-06 | 4.34E-05 | 515 | 515 |
| ADAMTS14  | 0.195456 | 7.90E-06 | 4.29E-05 | 515 | 515 |
| ZFYVE26   | 0.195497 | 7.86E-06 | 4.27E-05 | 515 | 515 |
| ELF1      | 0.195566 | 7.80E-06 | 4.24E-05 | 515 | 515 |
| PHLDA1    | 0.195577 | 7.79E-06 | 4.24E-05 | 515 | 515 |
| CHST7     | 0.195595 | 7.78E-06 | 4.23E-05 | 515 | 515 |
| FHL5      | 0.1956   | 7.77E-06 | 4.23E-05 | 515 | 515 |
| AADAC     | 0.19562  | 7.76E-06 | 4.22E-05 | 515 | 493 |
| COPZ2     | 0.195623 | 7.75E-06 | 4.22E-05 | 515 | 515 |
| SEPT7     | 0.195735 | 7.66E-06 | 4.17E-05 | 515 | 515 |
| GPR64     | 0.195807 | 7.60E-06 | 4.14E-05 | 515 | 515 |
| LOC348840 | 0.195809 | 7.60E-06 | 4.14E-05 | 515 | 271 |
| KLF4      | 0.195816 | 7.59E-06 | 4.14E-05 | 515 | 515 |
| COL13A1   | 0.195847 | 7.57E-06 | 4.13E-05 | 515 | 515 |
| CXCL1     | 0.195937 | 7.49E-06 | 4.09E-05 | 515 | 515 |
| KTELC1    | 0.195943 | 7.49E-06 | 4.09E-05 | 515 | 515 |
| ISCU      | 0.196131 | 7.34E-06 | 4.01E-05 | 515 | 515 |
| FGFBP2    | 0.196154 | 7.32E-06 | 4.00E-05 | 515 | 505 |
| EFCAB1    | 0.19618  | 7.30E-06 | 3.99E-05 | 515 | 507 |
| THBS2     | 0.196238 | 7.25E-06 | 3.97E-05 | 515 | 515 |
| C1orf216  | 0.196263 | 7.23E-06 | 3.96E-05 | 515 | 515 |
| VAMP3     | 0.196271 | 7.22E-06 | 3.96E-05 | 515 | 515 |
| PPFIBP1   | 0.196283 | 7.21E-06 | 3.95E-05 | 515 | 515 |
| KLF2      | 0.196304 | 7.20E-06 | 3.95E-05 | 515 | 515 |
| HPS1      | 0.196337 | 7.17E-06 | 3.93E-05 | 515 | 515 |

|           |          |          |          |     |     |
|-----------|----------|----------|----------|-----|-----|
| MYL9      | 0.196376 | 7.14E-06 | 3.92E-05 | 515 | 515 |
| LOC653501 | 0.196378 | 7.14E-06 | 3.92E-05 | 515 | 515 |
| NTM       | 0.196459 | 7.08E-06 | 3.88E-05 | 515 | 515 |
| PFKFB3    | 0.196541 | 7.01E-06 | 3.85E-05 | 515 | 515 |
| SH3GLB1   | 0.196616 | 6.96E-06 | 3.82E-05 | 515 | 515 |
| HEXB      | 0.196668 | 6.92E-06 | 3.80E-05 | 515 | 515 |
| LHX6      | 0.196711 | 6.88E-06 | 3.79E-05 | 515 | 515 |
| CEBPA     | 0.196766 | 6.84E-06 | 3.77E-05 | 515 | 515 |
| BCL10     | 0.196837 | 6.79E-06 | 3.74E-05 | 515 | 515 |
| TMEM158   | 0.197228 | 6.50E-06 | 3.59E-05 | 515 | 515 |
| ZNF331    | 0.197269 | 6.48E-06 | 3.57E-05 | 515 | 515 |
| CDCP1     | 0.197395 | 6.39E-06 | 3.53E-05 | 515 | 515 |
| ATP6VOE1  | 0.197409 | 6.38E-06 | 3.52E-05 | 515 | 515 |
| CACNA1A   | 0.197606 | 6.24E-06 | 3.46E-05 | 515 | 512 |
| LGMN      | 0.197611 | 6.24E-06 | 3.46E-05 | 515 | 515 |
| ITPR1     | 0.197731 | 6.15E-06 | 3.42E-05 | 515 | 515 |
| CLDN18    | 0.197776 | 6.12E-06 | 3.40E-05 | 515 | 512 |
| ZNF658    | 0.197819 | 6.09E-06 | 3.38E-05 | 515 | 514 |
| SLC16A1   | 0.197873 | 6.06E-06 | 3.37E-05 | 515 | 515 |
| OR2B11    | 0.198172 | 5.86E-06 | 3.27E-05 | 515 | 116 |
| TNNT1     | 0.198204 | 5.84E-06 | 3.25E-05 | 515 | 501 |
| ETHE1     | 0.198256 | 5.81E-06 | 3.24E-05 | 515 | 515 |
| MID2      | 0.198351 | 5.75E-06 | 3.21E-05 | 515 | 515 |
| KRT73     | 0.198434 | 5.69E-06 | 3.18E-05 | 515 | 128 |
| WSCD2     | 0.198459 | 5.68E-06 | 3.17E-05 | 515 | 498 |
| MFAP3     | 0.198661 | 5.55E-06 | 3.11E-05 | 515 | 515 |
| CREB3L3   | 0.198678 | 5.54E-06 | 3.10E-05 | 515 | 387 |
| IMPG2     | 0.198691 | 5.53E-06 | 3.10E-05 | 515 | 459 |
| LEPROT    | 0.198695 | 5.53E-06 | 3.10E-05 | 515 | 515 |
| LRRN4     | 0.198719 | 5.52E-06 | 3.09E-05 | 515 | 515 |
| DKK3      | 0.198741 | 5.50E-06 | 3.09E-05 | 515 | 515 |
| FLJ41941  | 0.198815 | 5.46E-06 | 3.06E-05 | 515 | 307 |
| DBR1      | 0.198873 | 5.42E-06 | 3.04E-05 | 515 | 515 |
| MYL2      | 0.198877 | 5.42E-06 | 3.04E-05 | 515 | 189 |
| INMT      | 0.198972 | 5.36E-06 | 3.01E-05 | 515 | 515 |
| CCDC39    | 0.198988 | 5.36E-06 | 3.01E-05 | 515 | 515 |
| PLXDC1    | 0.199055 | 5.32E-06 | 2.99E-05 | 515 | 515 |
| OGG1      | 0.199074 | 5.30E-06 | 2.98E-05 | 515 | 515 |
| C17orf67  | 0.199104 | 5.29E-06 | 2.97E-05 | 515 | 515 |
| JAM3      | 0.199114 | 5.28E-06 | 2.97E-05 | 515 | 515 |
| TBK1      | 0.199135 | 5.27E-06 | 2.97E-05 | 515 | 515 |
| TPSD1     | 0.199178 | 5.24E-06 | 2.95E-05 | 515 | 457 |
| TAGLN     | 0.199191 | 5.24E-06 | 2.95E-05 | 515 | 515 |
| KRT36     | 0.199203 | 5.23E-06 | 2.95E-05 | 515 | 391 |
| KRT1      | 0.199239 | 5.21E-06 | 2.93E-05 | 515 | 414 |
| TMEM194B  | 0.199303 | 5.17E-06 | 2.91E-05 | 515 | 515 |
| SERPINA3  | 0.199405 | 5.11E-06 | 2.88E-05 | 515 | 514 |
| NCRNA0018 | 0.199409 | 5.11E-06 | 2.88E-05 | 515 | 515 |
| CNBP      | 0.199499 | 5.06E-06 | 2.86E-05 | 515 | 515 |
| SERPINB1  | 0.199518 | 5.05E-06 | 2.85E-05 | 515 | 515 |
| ADCYAP1   | 0.199542 | 5.04E-06 | 2.84E-05 | 515 | 494 |
| SPATA9    | 0.199572 | 5.02E-06 | 2.84E-05 | 515 | 511 |
| JUNB      | 0.199631 | 4.99E-06 | 2.82E-05 | 515 | 515 |
| PIWIL4    | 0.199716 | 4.94E-06 | 2.79E-05 | 515 | 515 |

|           |          |          |          |     |     |
|-----------|----------|----------|----------|-----|-----|
| CHRFAM7A  | 0.199765 | 4.91E-06 | 2.78E-05 | 515 | 513 |
| P2RY11    | 0.19979  | 4.90E-06 | 2.77E-05 | 515 | 511 |
| FRMD4B    | 0.199792 | 4.90E-06 | 2.77E-05 | 515 | 515 |
| FBP1      | 0.1999   | 4.84E-06 | 2.74E-05 | 515 | 515 |
| FBX040    | 0.19996  | 4.81E-06 | 2.72E-05 | 515 | 292 |
| LOC100130 | 0.199983 | 4.79E-06 | 2.72E-05 | 515 | 515 |
| LOC285954 | 0.200018 | 4.78E-06 | 2.71E-05 | 515 | 446 |
| HPSE      | 0.200026 | 4.77E-06 | 2.71E-05 | 515 | 515 |
| ACTB      | 0.200036 | 4.77E-06 | 2.70E-05 | 515 | 515 |
| ACTA2     | 0.200065 | 4.75E-06 | 2.70E-05 | 515 | 515 |
| RASGRF2   | 0.200245 | 4.66E-06 | 2.65E-05 | 515 | 515 |
| ADCY4     | 0.200431 | 4.56E-06 | 2.60E-05 | 515 | 515 |
| KLF8      | 0.200464 | 4.54E-06 | 2.59E-05 | 515 | 515 |
| ITM2B     | 0.200468 | 4.54E-06 | 2.59E-05 | 515 | 515 |
| SRL       | 0.200546 | 4.50E-06 | 2.56E-05 | 515 | 514 |
| GPR110    | 0.200597 | 4.48E-06 | 2.55E-05 | 515 | 513 |
| NUDT18    | 0.200696 | 4.43E-06 | 2.53E-05 | 515 | 515 |
| FMO4      | 0.200888 | 4.33E-06 | 2.47E-05 | 515 | 515 |
| FAM101B   | 0.200894 | 4.33E-06 | 2.47E-05 | 515 | 515 |
| CACNA1E   | 0.200977 | 4.29E-06 | 2.45E-05 | 515 | 486 |
| CLK4      | 0.201033 | 4.26E-06 | 2.44E-05 | 515 | 515 |
| MGC45800  | 0.201036 | 4.26E-06 | 2.44E-05 | 515 | 485 |
| PDE2A     | 0.201044 | 4.26E-06 | 2.44E-05 | 515 | 515 |
| BAAT      | 0.201049 | 4.26E-06 | 2.44E-05 | 515 | 509 |
| IGFBP6    | 0.201167 | 4.20E-06 | 2.41E-05 | 515 | 515 |
| SELT      | 0.201202 | 4.18E-06 | 2.40E-05 | 515 | 515 |
| C9orf95   | 0.201218 | 4.18E-06 | 2.39E-05 | 515 | 515 |
| KLHL33    | 0.201291 | 4.14E-06 | 2.38E-05 | 515 | 366 |
| DLG4      | 0.201326 | 4.13E-06 | 2.37E-05 | 515 | 515 |
| IL1F7     | 0.201342 | 4.12E-06 | 2.36E-05 | 515 | 431 |
| AP3S1     | 0.201507 | 4.04E-06 | 2.32E-05 | 515 | 515 |
| LOC440354 | 0.201539 | 4.03E-06 | 2.31E-05 | 515 | 515 |
| C6orf141  | 0.201593 | 4.00E-06 | 2.30E-05 | 515 | 510 |
| CCNH      | 0.201673 | 3.97E-06 | 2.28E-05 | 515 | 515 |
| GPX1      | 0.20171  | 3.95E-06 | 2.27E-05 | 515 | 515 |
| GPC6      | 0.201745 | 3.94E-06 | 2.27E-05 | 515 | 515 |
| C6orf191  | 0.201769 | 3.93E-06 | 2.26E-05 | 515 | 94  |
| ZNF442    | 0.201789 | 3.92E-06 | 2.26E-05 | 515 | 515 |
| COMMD8    | 0.201922 | 3.86E-06 | 2.22E-05 | 515 | 515 |
| PDE1A     | 0.201942 | 3.85E-06 | 2.22E-05 | 515 | 515 |
| FAM65A    | 0.201963 | 3.84E-06 | 2.21E-05 | 515 | 515 |
| CMA1      | 0.201974 | 3.84E-06 | 2.21E-05 | 515 | 327 |
| GCNT1     | 0.202036 | 3.81E-06 | 2.20E-05 | 515 | 515 |
| C5orf44   | 0.202061 | 3.80E-06 | 2.20E-05 | 515 | 515 |
| CEPT1     | 0.202159 | 3.76E-06 | 2.17E-05 | 515 | 515 |
| IKBIP     | 0.2022   | 3.74E-06 | 2.17E-05 | 515 | 515 |
| CBL       | 0.202221 | 3.73E-06 | 2.16E-05 | 515 | 515 |
| DLEU7     | 0.202302 | 3.70E-06 | 2.14E-05 | 515 | 503 |
| TMEM38B   | 0.202334 | 3.68E-06 | 2.14E-05 | 515 | 515 |
| FAM198B   | 0.20241  | 3.65E-06 | 2.12E-05 | 515 | 515 |
| EPHA3     | 0.202427 | 3.65E-06 | 2.12E-05 | 515 | 515 |
| ZNF266    | 0.20247  | 3.63E-06 | 2.11E-05 | 515 | 515 |
| FAM180A   | 0.202564 | 3.59E-06 | 2.09E-05 | 515 | 511 |
| WDFY2     | 0.202716 | 3.53E-06 | 2.05E-05 | 515 | 515 |

|           |          |          |          |     |     |
|-----------|----------|----------|----------|-----|-----|
| NPC1      | 0.202729 | 3.52E-06 | 2.05E-05 | 515 | 515 |
| ADAMTS16  | 0.202782 | 3.50E-06 | 2.04E-05 | 515 | 512 |
| GRIK4     | 0.202784 | 3.50E-06 | 2.04E-05 | 515 | 478 |
| HSD17B14  | 0.202807 | 3.49E-06 | 2.03E-05 | 515 | 515 |
| PTGFR     | 0.202849 | 3.48E-06 | 2.03E-05 | 515 | 513 |
| PPIL4     | 0.202859 | 3.47E-06 | 2.02E-05 | 515 | 515 |
| ZNF333    | 0.202892 | 3.46E-06 | 2.02E-05 | 515 | 515 |
| RCAN2     | 0.202922 | 3.45E-06 | 2.01E-05 | 515 | 515 |
| GSTK1     | 0.203011 | 3.41E-06 | 1.99E-05 | 515 | 515 |
| SLC20A1   | 0.203043 | 3.40E-06 | 1.99E-05 | 515 | 515 |
| BICD1     | 0.203046 | 3.40E-06 | 1.99E-05 | 515 | 515 |
| CYR61     | 0.203073 | 3.39E-06 | 1.98E-05 | 515 | 515 |
| IL17F     | 0.203099 | 3.38E-06 | 1.97E-05 | 515 | 113 |
| C1QTNF7   | 0.203106 | 3.38E-06 | 1.97E-05 | 515 | 515 |
| TNR       | 0.203218 | 3.33E-06 | 1.95E-05 | 515 | 323 |
| DES       | 0.203341 | 3.29E-06 | 1.92E-05 | 515 | 515 |
| COL14A1   | 0.203413 | 3.26E-06 | 1.91E-05 | 515 | 515 |
| NPR2      | 0.20352  | 3.22E-06 | 1.89E-05 | 515 | 515 |
| CGGBP1    | 0.203549 | 3.21E-06 | 1.88E-05 | 515 | 515 |
| ZC3H12A   | 0.203566 | 3.20E-06 | 1.88E-05 | 515 | 515 |
| SCN11A    | 0.203575 | 3.20E-06 | 1.88E-05 | 515 | 485 |
| NRIP1     | 0.203622 | 3.18E-06 | 1.87E-05 | 515 | 515 |
| RETN      | 0.20368  | 3.16E-06 | 1.86E-05 | 515 | 480 |
| PHLDB2    | 0.203703 | 3.15E-06 | 1.85E-05 | 515 | 515 |
| ZFP57     | 0.203881 | 3.09E-06 | 1.82E-05 | 515 | 457 |
| MT1G      | 0.20389  | 3.09E-06 | 1.82E-05 | 515 | 513 |
| ZBTB2     | 0.203919 | 3.08E-06 | 1.81E-05 | 515 | 515 |
| FAM176A   | 0.203967 | 3.06E-06 | 1.80E-05 | 515 | 515 |
| C1orf228  | 0.203994 | 3.05E-06 | 1.80E-05 | 515 | 514 |
| NDN       | 0.204246 | 2.97E-06 | 1.75E-05 | 515 | 515 |
| HNMT      | 0.204259 | 2.96E-06 | 1.75E-05 | 515 | 515 |
| DNAJB9    | 0.204408 | 2.91E-06 | 1.72E-05 | 515 | 515 |
| POLN      | 0.2045   | 2.88E-06 | 1.70E-05 | 515 | 511 |
| ST6GALNAC | 0.204524 | 2.87E-06 | 1.70E-05 | 515 | 515 |
| TWIST1    | 0.204538 | 2.87E-06 | 1.70E-05 | 515 | 511 |
| AQP10     | 0.204553 | 2.86E-06 | 1.70E-05 | 515 | 353 |
| TBX19     | 0.204643 | 2.83E-06 | 1.68E-05 | 515 | 515 |
| AIPL1     | 0.204685 | 2.82E-06 | 1.67E-05 | 515 | 174 |
| TTN       | 0.204745 | 2.80E-06 | 1.66E-05 | 515 | 515 |
| TSPAN17   | 0.204804 | 2.78E-06 | 1.65E-05 | 515 | 515 |
| PLEKHF2   | 0.204812 | 2.78E-06 | 1.65E-05 | 515 | 515 |
| NEK6      | 0.20485  | 2.77E-06 | 1.64E-05 | 515 | 515 |
| UBE2QL1   | 0.204949 | 2.74E-06 | 1.63E-05 | 515 | 512 |
| HPRT1     | 0.205076 | 2.70E-06 | 1.61E-05 | 515 | 515 |
| NRP1      | 0.205109 | 2.69E-06 | 1.60E-05 | 515 | 515 |
| GHR       | 0.205157 | 2.67E-06 | 1.59E-05 | 515 | 515 |
| CLDN11    | 0.205277 | 2.64E-06 | 1.57E-05 | 515 | 515 |
| ZNF385D   | 0.20543  | 2.59E-06 | 1.55E-05 | 515 | 497 |
| EID3      | 0.205786 | 2.49E-06 | 1.49E-05 | 515 | 515 |
| STEAP2    | 0.205807 | 2.48E-06 | 1.48E-05 | 515 | 515 |
| MAP3K5    | 0.205818 | 2.48E-06 | 1.48E-05 | 515 | 515 |
| RRAS      | 0.205846 | 2.47E-06 | 1.48E-05 | 515 | 515 |
| FTL       | 0.205874 | 2.46E-06 | 1.47E-05 | 515 | 515 |
| FABP6     | 0.205886 | 2.46E-06 | 1.47E-05 | 515 | 502 |



|           |          |          |          |     |     |
|-----------|----------|----------|----------|-----|-----|
| NCAM2     | 0.205905 | 2.45E-06 | 1.47E-05 | 515 | 515 |
| ZC4H2     | 0.205951 | 2.44E-06 | 1.46E-05 | 515 | 515 |
| C1QTNF2   | 0.206022 | 2.42E-06 | 1.45E-05 | 515 | 515 |
| LHFP      | 0.206127 | 2.39E-06 | 1.44E-05 | 515 | 515 |
| FAM166B   | 0.206234 | 2.36E-06 | 1.42E-05 | 515 | 511 |
| ATP6V0A2  | 0.20628  | 2.35E-06 | 1.41E-05 | 515 | 515 |
| LRRN2     | 0.206325 | 2.34E-06 | 1.40E-05 | 515 | 515 |
| PTCH2     | 0.206335 | 2.34E-06 | 1.40E-05 | 515 | 513 |
| CMTM6     | 0.206453 | 2.30E-06 | 1.39E-05 | 515 | 515 |
| EDNRA     | 0.206492 | 2.29E-06 | 1.38E-05 | 515 | 515 |
| ZNF474    | 0.206529 | 2.28E-06 | 1.37E-05 | 515 | 510 |
| RB1       | 0.206603 | 2.26E-06 | 1.36E-05 | 515 | 515 |
| PCDH17    | 0.206618 | 2.26E-06 | 1.36E-05 | 515 | 515 |
| KRT2      | 0.206654 | 2.25E-06 | 1.36E-05 | 515 | 219 |
| CSMD2     | 0.206683 | 2.24E-06 | 1.35E-05 | 515 | 514 |
| CAST      | 0.206763 | 2.22E-06 | 1.34E-05 | 515 | 515 |
| ACY3      | 0.206794 | 2.21E-06 | 1.34E-05 | 515 | 514 |
| C13orf15  | 0.206871 | 2.20E-06 | 1.32E-05 | 515 | 515 |
| NAP1L2    | 0.206908 | 2.19E-06 | 1.32E-05 | 515 | 515 |
| CDKN2C    | 0.207182 | 2.12E-06 | 1.28E-05 | 515 | 515 |
| HSPA6     | 0.207265 | 2.10E-06 | 1.27E-05 | 515 | 515 |
| METTL8    | 0.207306 | 2.09E-06 | 1.26E-05 | 515 | 515 |
| ZBTB6     | 0.207356 | 2.08E-06 | 1.26E-05 | 515 | 515 |
| KLF13     | 0.207367 | 2.07E-06 | 1.26E-05 | 515 | 515 |
| WNT1      | 0.207451 | 2.05E-06 | 1.25E-05 | 515 | 478 |
| DPH3      | 0.207538 | 2.03E-06 | 1.23E-05 | 515 | 515 |
| C2orf88   | 0.207545 | 2.03E-06 | 1.23E-05 | 515 | 515 |
| LOC344595 | 0.207616 | 2.01E-06 | 1.22E-05 | 515 | 515 |
| EPHB2     | 0.207621 | 2.01E-06 | 1.22E-05 | 515 | 515 |
| CCDC28A   | 0.207627 | 2.01E-06 | 1.22E-05 | 515 | 515 |
| CARD6     | 0.207684 | 2.00E-06 | 1.22E-05 | 515 | 515 |
| ZNF557    | 0.207742 | 1.99E-06 | 1.21E-05 | 515 | 515 |
| FABP5     | 0.207776 | 1.98E-06 | 1.20E-05 | 515 | 515 |
| SPOCD1    | 0.207868 | 1.96E-06 | 1.19E-05 | 515 | 515 |
| VAV3      | 0.207966 | 1.93E-06 | 1.18E-05 | 515 | 515 |
| LOC100129 | 0.207975 | 1.93E-06 | 1.18E-05 | 515 | 497 |
| PLEKHA4   | 0.208237 | 1.87E-06 | 1.14E-05 | 515 | 515 |
| COL22A1   | 0.208315 | 1.86E-06 | 1.13E-05 | 515 | 515 |
| RIMBP3C   | 0.208447 | 1.83E-06 | 1.12E-05 | 515 | 505 |
| STX12     | 0.208656 | 1.79E-06 | 1.09E-05 | 515 | 515 |
| COL16A1   | 0.208697 | 1.78E-06 | 1.09E-05 | 515 | 515 |
| ARL4C     | 0.208702 | 1.78E-06 | 1.09E-05 | 515 | 515 |
| BBX       | 0.208743 | 1.77E-06 | 1.08E-05 | 515 | 515 |
| VSTM1     | 0.208784 | 1.76E-06 | 1.08E-05 | 515 | 349 |
| TTL       | 0.208812 | 1.75E-06 | 1.08E-05 | 515 | 515 |
| SAMD8     | 0.208859 | 1.74E-06 | 1.07E-05 | 515 | 515 |
| GNG8      | 0.208913 | 1.73E-06 | 1.06E-05 | 515 | 131 |
| IL13RA2   | 0.209044 | 1.71E-06 | 1.05E-05 | 515 | 482 |
| SEMA3D    | 0.209064 | 1.70E-06 | 1.05E-05 | 515 | 514 |
| MGP       | 0.209065 | 1.70E-06 | 1.05E-05 | 515 | 515 |
| BIRC2     | 0.209122 | 1.69E-06 | 1.04E-05 | 515 | 515 |
| RRAGC     | 0.209268 | 1.66E-06 | 1.02E-05 | 515 | 515 |
| CATSPER1  | 0.209273 | 1.66E-06 | 1.02E-05 | 515 | 507 |
| CAV1      | 0.20942  | 1.63E-06 | 1.01E-05 | 515 | 515 |

|           |          |          |          |     |     |
|-----------|----------|----------|----------|-----|-----|
| TPM4      | 0.209441 | 1.63E-06 | 1.00E-05 | 515 | 515 |
| NCRNA0018 | 0.209451 | 1.63E-06 | 1.00E-05 | 515 | 515 |
| THG1L     | 0.209495 | 1.62E-06 | 9.99E-06 | 515 | 515 |
| FSD1L     | 0.209517 | 1.61E-06 | 9.96E-06 | 515 | 515 |
| DZIP3     | 0.209583 | 1.60E-06 | 9.89E-06 | 515 | 515 |
| LOC220930 | 0.209732 | 1.57E-06 | 9.73E-06 | 515 | 515 |
| CPA5      | 0.209751 | 1.57E-06 | 9.71E-06 | 515 | 278 |
| TAL1      | 0.209773 | 1.57E-06 | 9.69E-06 | 515 | 515 |
| PCDHGB7   | 0.209792 | 1.56E-06 | 9.68E-06 | 515 | 515 |
| ZFP36L1   | 0.209881 | 1.55E-06 | 9.59E-06 | 515 | 515 |
| ISM1      | 0.210075 | 1.51E-06 | 9.38E-06 | 515 | 515 |
| MMP14     | 0.210272 | 1.48E-06 | 9.17E-06 | 515 | 515 |
| NTRK2     | 0.210346 | 1.47E-06 | 9.10E-06 | 515 | 514 |
| TWF2      | 0.210593 | 1.42E-06 | 8.85E-06 | 515 | 515 |
| HRH4      | 0.210632 | 1.42E-06 | 8.82E-06 | 515 | 453 |
| APOBEC3B  | 0.210735 | 1.40E-06 | 8.72E-06 | 515 | 514 |
| SLC16A7   | 0.210784 | 1.39E-06 | 8.67E-06 | 515 | 514 |
| TSPAN4    | 0.210796 | 1.39E-06 | 8.66E-06 | 515 | 515 |
| CHN2      | 0.210949 | 1.37E-06 | 8.51E-06 | 515 | 515 |
| STON1     | 0.211082 | 1.34E-06 | 8.38E-06 | 515 | 515 |
| MAPRE2    | 0.211123 | 1.34E-06 | 8.35E-06 | 515 | 515 |
| C20orf202 | 0.211173 | 1.33E-06 | 8.30E-06 | 515 | 510 |
| SPCS3     | 0.211178 | 1.33E-06 | 8.30E-06 | 515 | 515 |
| ATG4C     | 0.211178 | 1.33E-06 | 8.30E-06 | 515 | 515 |
| GRN       | 0.211216 | 1.32E-06 | 8.27E-06 | 515 | 515 |
| FAM124A   | 0.211257 | 1.32E-06 | 8.23E-06 | 515 | 515 |
| DENND4A   | 0.211355 | 1.30E-06 | 8.15E-06 | 515 | 515 |
| ANKDD1A   | 0.21143  | 1.29E-06 | 8.08E-06 | 515 | 515 |
| RASA4     | 0.211678 | 1.25E-06 | 7.85E-06 | 515 | 515 |
| U2AF1L4   | 0.211695 | 1.25E-06 | 7.84E-06 | 515 | 515 |
| ADAM23    | 0.211823 | 1.23E-06 | 7.73E-06 | 515 | 506 |
| GRM2      | 0.211867 | 1.23E-06 | 7.69E-06 | 515 | 503 |
| FUCA1     | 0.211893 | 1.22E-06 | 7.67E-06 | 515 | 515 |
| GPX7      | 0.211947 | 1.21E-06 | 7.63E-06 | 515 | 515 |
| ACTBL2    | 0.21196  | 1.21E-06 | 7.62E-06 | 515 | 462 |
| RARB      | 0.212    | 1.21E-06 | 7.59E-06 | 515 | 515 |
| PRELP     | 0.212061 | 1.20E-06 | 7.54E-06 | 515 | 515 |
| BCHE      | 0.212259 | 1.17E-06 | 7.37E-06 | 515 | 514 |
| C6orf222  | 0.21231  | 1.16E-06 | 7.33E-06 | 515 | 483 |
| ARHGAP10  | 0.212316 | 1.16E-06 | 7.33E-06 | 515 | 515 |
| RGS3      | 0.212602 | 1.12E-06 | 7.10E-06 | 515 | 515 |
| CCIN      | 0.212693 | 1.11E-06 | 7.03E-06 | 515 | 493 |
| RELL2     | 0.21288  | 1.09E-06 | 6.88E-06 | 515 | 515 |
| PODN      | 0.2129   | 1.08E-06 | 6.87E-06 | 515 | 515 |
| LYRM7     | 0.212937 | 1.08E-06 | 6.84E-06 | 515 | 515 |
| ABHD6     | 0.212948 | 1.08E-06 | 6.84E-06 | 515 | 515 |
| POU6F1    | 0.213066 | 1.06E-06 | 6.74E-06 | 515 | 515 |
| DNAJC18   | 0.213114 | 1.06E-06 | 6.71E-06 | 515 | 515 |
| LOC90586  | 0.213199 | 1.05E-06 | 6.65E-06 | 515 | 489 |
| POC5      | 0.213209 | 1.04E-06 | 6.64E-06 | 515 | 515 |
| CDA       | 0.213222 | 1.04E-06 | 6.63E-06 | 515 | 514 |
| C10orf72  | 0.213368 | 1.03E-06 | 6.52E-06 | 515 | 515 |
| SERPINE1  | 0.213452 | 1.02E-06 | 6.46E-06 | 515 | 515 |
| ZNF563    | 0.213522 | 1.01E-06 | 6.41E-06 | 515 | 515 |

|           |          |          |          |     |     |
|-----------|----------|----------|----------|-----|-----|
| CLEC4F    | 0.213609 | 9.96E-07 | 6.35E-06 | 515 | 477 |
| LOX       | 0.213617 | 9.95E-07 | 6.34E-06 | 515 | 515 |
| MBD2      | 0.213679 | 9.88E-07 | 6.30E-06 | 515 | 515 |
| EED       | 0.213691 | 9.87E-07 | 6.29E-06 | 515 | 515 |
| UBE2Z     | 0.213703 | 9.85E-07 | 6.29E-06 | 515 | 515 |
| INHBA     | 0.213753 | 9.79E-07 | 6.25E-06 | 515 | 515 |
| STMN3     | 0.213764 | 9.78E-07 | 6.24E-06 | 515 | 515 |
| GTDC1     | 0.213894 | 9.63E-07 | 6.15E-06 | 515 | 515 |
| SUSD1     | 0.213975 | 9.54E-07 | 6.10E-06 | 515 | 515 |
| PPP1R12A  | 0.214018 | 9.49E-07 | 6.07E-06 | 515 | 515 |
| MDS2      | 0.214095 | 9.40E-07 | 6.02E-06 | 515 | 426 |
| COLQ      | 0.214107 | 9.39E-07 | 6.01E-06 | 515 | 515 |
| KIR2DS4   | 0.214141 | 9.35E-07 | 5.99E-06 | 515 | 367 |
| ANKRD1    | 0.214163 | 9.33E-07 | 5.97E-06 | 515 | 506 |
| DKFZp566F | 0.214174 | 9.31E-07 | 5.97E-06 | 515 | 317 |
| ZUFSP     | 0.214222 | 9.26E-07 | 5.94E-06 | 515 | 515 |
| APH1B     | 0.214244 | 9.24E-07 | 5.92E-06 | 515 | 515 |
| SOCS2     | 0.214379 | 9.09E-07 | 5.83E-06 | 515 | 515 |
| TNFAIP8L1 | 0.214382 | 9.08E-07 | 5.83E-06 | 515 | 515 |
| RIC3      | 0.214397 | 9.07E-07 | 5.82E-06 | 515 | 513 |
| SLC11A1   | 0.214484 | 8.97E-07 | 5.77E-06 | 515 | 515 |
| PLS3      | 0.214498 | 8.96E-07 | 5.76E-06 | 515 | 515 |
| SLIT3     | 0.214517 | 8.94E-07 | 5.75E-06 | 515 | 515 |
| SPON1     | 0.214574 | 8.88E-07 | 5.72E-06 | 515 | 515 |
| FBXO10    | 0.21467  | 8.78E-07 | 5.66E-06 | 515 | 515 |
| S100A4    | 0.21481  | 8.63E-07 | 5.57E-06 | 515 | 515 |
| DCBLD2    | 0.214824 | 8.62E-07 | 5.56E-06 | 515 | 515 |
| PGLYRP2   | 0.214824 | 8.62E-07 | 5.56E-06 | 515 | 348 |
| FAM178A   | 0.214867 | 8.57E-07 | 5.54E-06 | 515 | 515 |
| PCGF5     | 0.214938 | 8.50E-07 | 5.49E-06 | 515 | 515 |
| GPR1      | 0.214954 | 8.48E-07 | 5.49E-06 | 515 | 499 |
| UHRF2     | 0.215033 | 8.40E-07 | 5.44E-06 | 515 | 515 |
| LOC100126 | 0.215135 | 8.30E-07 | 5.38E-06 | 515 | 513 |
| C5orf15   | 0.215215 | 8.22E-07 | 5.33E-06 | 515 | 515 |
| NUPR1     | 0.215221 | 8.22E-07 | 5.32E-06 | 515 | 515 |
| HPS3      | 0.215524 | 7.92E-07 | 5.14E-06 | 515 | 515 |
| FAM114A2  | 0.215525 | 7.92E-07 | 5.14E-06 | 515 | 515 |
| ENG       | 0.215539 | 7.91E-07 | 5.13E-06 | 515 | 515 |
| THBD      | 0.215719 | 7.74E-07 | 5.03E-06 | 515 | 515 |
| TNFSF13   | 0.215729 | 7.73E-07 | 5.02E-06 | 515 | 515 |
| BCAP29    | 0.215739 | 7.72E-07 | 5.02E-06 | 515 | 515 |
| LOC729678 | 0.215745 | 7.71E-07 | 5.02E-06 | 515 | 515 |
| F8        | 0.215773 | 7.69E-07 | 5.00E-06 | 515 | 515 |
| CDYL2     | 0.215784 | 7.68E-07 | 5.00E-06 | 515 | 515 |
| SCUBE1    | 0.216103 | 7.39E-07 | 4.81E-06 | 515 | 513 |
| EPYC      | 0.216107 | 7.38E-07 | 4.81E-06 | 515 | 422 |
| SEL1L     | 0.216165 | 7.33E-07 | 4.78E-06 | 515 | 515 |
| C5orf39   | 0.216302 | 7.21E-07 | 4.71E-06 | 515 | 515 |
| IL1RL1    | 0.216388 | 7.14E-07 | 4.66E-06 | 515 | 511 |
| HDAC3     | 0.216431 | 7.10E-07 | 4.64E-06 | 515 | 515 |
| STEAP1    | 0.216444 | 7.09E-07 | 4.63E-06 | 515 | 515 |
| LILRA2    | 0.216528 | 7.02E-07 | 4.59E-06 | 515 | 515 |
| CRBN      | 0.216553 | 7.00E-07 | 4.58E-06 | 515 | 515 |
| PLDN      | 0.216586 | 6.97E-07 | 4.56E-06 | 515 | 515 |

|           |          |          |          |     |     |
|-----------|----------|----------|----------|-----|-----|
| CAPN11    | 0.216603 | 6.96E-07 | 4.55E-06 | 515 | 476 |
| PXT1      | 0.216664 | 6.90E-07 | 4.52E-06 | 515 | 398 |
| FCER1A    | 0.216715 | 6.86E-07 | 4.50E-06 | 515 | 511 |
| GFRA1     | 0.216818 | 6.78E-07 | 4.44E-06 | 515 | 514 |
| TCEANC    | 0.216866 | 6.74E-07 | 4.42E-06 | 515 | 515 |
| TMEM90B   | 0.216879 | 6.73E-07 | 4.42E-06 | 515 | 515 |
| C6orf59   | 0.216966 | 6.66E-07 | 4.37E-06 | 515 | 492 |
| SGCA      | 0.217016 | 6.62E-07 | 4.35E-06 | 515 | 513 |
| RRAGD     | 0.217042 | 6.60E-07 | 4.34E-06 | 515 | 515 |
| UGCG      | 0.217096 | 6.55E-07 | 4.31E-06 | 515 | 515 |
| ZBTB24    | 0.217184 | 6.48E-07 | 4.27E-06 | 515 | 515 |
| MAN2A1    | 0.217246 | 6.44E-07 | 4.24E-06 | 515 | 515 |
| B3GNT2    | 0.217424 | 6.30E-07 | 4.15E-06 | 515 | 515 |
| KCNIP1    | 0.217431 | 6.29E-07 | 4.15E-06 | 515 | 480 |
| SHISA3    | 0.217565 | 6.19E-07 | 4.09E-06 | 515 | 512 |
| WDR69     | 0.217592 | 6.17E-07 | 4.08E-06 | 515 | 503 |
| MGAT2     | 0.2176   | 6.16E-07 | 4.07E-06 | 515 | 515 |
| AQP1      | 0.217642 | 6.13E-07 | 4.05E-06 | 515 | 515 |
| STX4      | 0.217808 | 6.01E-07 | 3.98E-06 | 515 | 515 |
| C10orf50  | 0.21785  | 5.98E-07 | 3.96E-06 | 515 | 291 |
| ITIH5     | 0.217852 | 5.98E-07 | 3.96E-06 | 515 | 515 |
| NSMAF     | 0.217865 | 5.97E-07 | 3.95E-06 | 515 | 515 |
| GRPR      | 0.217877 | 5.96E-07 | 3.95E-06 | 515 | 486 |
| SLC9A7    | 0.217981 | 5.89E-07 | 3.90E-06 | 515 | 515 |
| HMCN1     | 0.218051 | 5.84E-07 | 3.87E-06 | 515 | 515 |
| MAP3K2    | 0.218167 | 5.75E-07 | 3.82E-06 | 515 | 515 |
| SQRDL     | 0.218347 | 5.63E-07 | 3.75E-06 | 515 | 515 |
| EHD1      | 0.218395 | 5.60E-07 | 3.72E-06 | 515 | 515 |
| PEG3      | 0.218545 | 5.49E-07 | 3.66E-06 | 515 | 515 |
| PAIP2     | 0.218878 | 5.28E-07 | 3.52E-06 | 515 | 515 |
| CCDC136   | 0.218939 | 5.24E-07 | 3.50E-06 | 515 | 514 |
| GNPDA1    | 0.218981 | 5.21E-07 | 3.48E-06 | 515 | 515 |
| PCYOX1L   | 0.219028 | 5.18E-07 | 3.46E-06 | 515 | 515 |
| CLIP4     | 0.219079 | 5.15E-07 | 3.44E-06 | 515 | 515 |
| PNMA3     | 0.21909  | 5.14E-07 | 3.44E-06 | 515 | 509 |
| DNAJC24   | 0.219338 | 4.99E-07 | 3.34E-06 | 515 | 515 |
| ARPC4     | 0.219359 | 4.97E-07 | 3.34E-06 | 515 | 515 |
| SPARC     | 0.219412 | 4.94E-07 | 3.32E-06 | 515 | 515 |
| FBLN2     | 0.219423 | 4.94E-07 | 3.31E-06 | 515 | 515 |
| HSPB8     | 0.219518 | 4.88E-07 | 3.28E-06 | 515 | 515 |
| WDR49     | 0.219557 | 4.85E-07 | 3.26E-06 | 515 | 483 |
| TMSB15B   | 0.219708 | 4.77E-07 | 3.20E-06 | 515 | 514 |
| NHLRC4    | 0.219815 | 4.70E-07 | 3.16E-06 | 515 | 515 |
| TMEM100   | 0.219936 | 4.63E-07 | 3.12E-06 | 515 | 515 |
| ELL       | 0.21996  | 4.62E-07 | 3.11E-06 | 515 | 515 |
| MBD4      | 0.219979 | 4.61E-07 | 3.10E-06 | 515 | 515 |
| ITGBL1    | 0.219987 | 4.61E-07 | 3.10E-06 | 515 | 515 |
| MCOLN3    | 0.220195 | 4.49E-07 | 3.03E-06 | 515 | 514 |
| YTHDC2    | 0.22021  | 4.48E-07 | 3.02E-06 | 515 | 515 |
| LTBP2     | 0.220271 | 4.45E-07 | 3.00E-06 | 515 | 515 |
| NHEDC2    | 0.220289 | 4.44E-07 | 3.00E-06 | 515 | 515 |
| ARF6      | 0.220331 | 4.41E-07 | 2.98E-06 | 515 | 515 |
| LOC202181 | 0.220466 | 4.34E-07 | 2.93E-06 | 515 | 515 |
| ADAM28    | 0.220518 | 4.31E-07 | 2.92E-06 | 515 | 515 |

|           |          |          |          |     |     |
|-----------|----------|----------|----------|-----|-----|
| C4orf32   | 0.22053  | 4.31E-07 | 2.91E-06 | 515 | 515 |
| ERC2      | 0.220568 | 4.29E-07 | 2.90E-06 | 515 | 514 |
| C2        | 0.220594 | 4.27E-07 | 2.89E-06 | 515 | 515 |
| NLRP12    | 0.220597 | 4.27E-07 | 2.89E-06 | 515 | 509 |
| CCDC75    | 0.220617 | 4.26E-07 | 2.89E-06 | 515 | 515 |
| ART3      | 0.220666 | 4.24E-07 | 2.87E-06 | 515 | 327 |
| CHIC1     | 0.220693 | 4.22E-07 | 2.86E-06 | 515 | 515 |
| TBX5      | 0.220705 | 4.22E-07 | 2.86E-06 | 515 | 515 |
| LOC144571 | 0.220998 | 4.07E-07 | 2.76E-06 | 515 | 515 |
| SP140L    | 0.221076 | 4.03E-07 | 2.73E-06 | 515 | 515 |
| PROS1     | 0.221106 | 4.01E-07 | 2.73E-06 | 515 | 515 |
| F5        | 0.221296 | 3.92E-07 | 2.66E-06 | 515 | 515 |
| TP63      | 0.221433 | 3.85E-07 | 2.62E-06 | 515 | 514 |
| RLN1      | 0.221443 | 3.85E-07 | 2.62E-06 | 515 | 417 |
| IFI6      | 0.221611 | 3.77E-07 | 2.57E-06 | 515 | 515 |
| GABRR2    | 0.221669 | 3.74E-07 | 2.55E-06 | 515 | 470 |
| GLDN      | 0.221721 | 3.72E-07 | 2.54E-06 | 515 | 515 |
| ADAMTS12  | 0.221776 | 3.69E-07 | 2.52E-06 | 515 | 514 |
| CFL2      | 0.222065 | 3.56E-07 | 2.43E-06 | 515 | 515 |
| SYNPO     | 0.222102 | 3.55E-07 | 2.43E-06 | 515 | 515 |
| PLAUR     | 0.222123 | 3.54E-07 | 2.42E-06 | 515 | 515 |
| STAR      | 0.222123 | 3.54E-07 | 2.42E-06 | 515 | 508 |
| DIO2      | 0.222305 | 3.46E-07 | 2.37E-06 | 515 | 515 |
| LTC4S     | 0.222431 | 3.41E-07 | 2.33E-06 | 515 | 513 |
| FAM13B    | 0.222452 | 3.40E-07 | 2.33E-06 | 515 | 515 |
| PAMR1     | 0.222517 | 3.37E-07 | 2.31E-06 | 515 | 515 |
| LOC100240 | 0.222599 | 3.33E-07 | 2.29E-06 | 515 | 479 |
| SOCS3     | 0.222614 | 3.33E-07 | 2.28E-06 | 515 | 515 |
| FBX048    | 0.222682 | 3.30E-07 | 2.27E-06 | 515 | 515 |
| HCG4      | 0.222701 | 3.29E-07 | 2.26E-06 | 515 | 512 |
| LPAR4     | 0.222758 | 3.27E-07 | 2.25E-06 | 515 | 452 |
| GRAPL     | 0.222876 | 3.22E-07 | 2.21E-06 | 515 | 502 |
| LAMP2     | 0.222939 | 3.20E-07 | 2.20E-06 | 515 | 515 |
| RAD9B     | 0.223038 | 3.16E-07 | 2.17E-06 | 515 | 515 |
| ATP2B2    | 0.22304  | 3.16E-07 | 2.17E-06 | 515 | 430 |
| VIT       | 0.223129 | 3.12E-07 | 2.15E-06 | 515 | 384 |
| KAL1      | 0.223138 | 3.12E-07 | 2.15E-06 | 515 | 515 |
| C14orf106 | 0.223164 | 3.11E-07 | 2.15E-06 | 515 | 515 |
| SH3RF2    | 0.223224 | 3.09E-07 | 2.13E-06 | 515 | 515 |
| INPP4A    | 0.223287 | 3.06E-07 | 2.12E-06 | 515 | 515 |
| NMUR1     | 0.223374 | 3.03E-07 | 2.09E-06 | 515 | 514 |
| CLDND1    | 0.223522 | 2.97E-07 | 2.06E-06 | 515 | 515 |
| SEPT4     | 0.223599 | 2.94E-07 | 2.04E-06 | 515 | 515 |
| RAPGEF6   | 0.223878 | 2.84E-07 | 1.97E-06 | 515 | 515 |
| EMR3      | 0.223897 | 2.84E-07 | 1.97E-06 | 515 | 491 |
| IL4R      | 0.223956 | 2.82E-07 | 1.96E-06 | 515 | 515 |
| CYP26B1   | 0.22408  | 2.77E-07 | 1.93E-06 | 515 | 515 |
| SESN1     | 0.224272 | 2.71E-07 | 1.89E-06 | 515 | 515 |
| ACOT9     | 0.22428  | 2.70E-07 | 1.89E-06 | 515 | 515 |
| TSLP      | 0.224312 | 2.69E-07 | 1.88E-06 | 515 | 501 |
| FAM55D    | 0.224323 | 2.69E-07 | 1.88E-06 | 515 | 379 |
| MAOB      | 0.224371 | 2.67E-07 | 1.87E-06 | 515 | 515 |
| MEIS3     | 0.22438  | 2.67E-07 | 1.87E-06 | 515 | 515 |
| DYRK4     | 0.22443  | 2.65E-07 | 1.86E-06 | 515 | 515 |

|           |          |          |          |     |     |
|-----------|----------|----------|----------|-----|-----|
| C6orf120  | 0.224568 | 2.61E-07 | 1.83E-06 | 515 | 515 |
| CACNA1C   | 0.224618 | 2.59E-07 | 1.82E-06 | 515 | 515 |
| HEPH      | 0.224712 | 2.56E-07 | 1.80E-06 | 515 | 515 |
| CFB       | 0.224714 | 2.56E-07 | 1.80E-06 | 515 | 515 |
| HMGCLL1   | 0.224774 | 2.54E-07 | 1.78E-06 | 515 | 503 |
| ISLR2     | 0.224815 | 2.53E-07 | 1.78E-06 | 515 | 512 |
| SULF2     | 0.224836 | 2.52E-07 | 1.77E-06 | 515 | 515 |
| CEP110    | 0.225161 | 2.42E-07 | 1.70E-06 | 515 | 515 |
| SFRP2     | 0.225168 | 2.42E-07 | 1.70E-06 | 515 | 515 |
| FCRLB     | 0.225176 | 2.42E-07 | 1.70E-06 | 515 | 515 |
| LOC282997 | 0.225216 | 2.40E-07 | 1.69E-06 | 515 | 515 |
| FRMD3     | 0.225284 | 2.38E-07 | 1.68E-06 | 515 | 515 |
| PLCH2     | 0.225311 | 2.38E-07 | 1.67E-06 | 515 | 515 |
| GLT8D2    | 0.225392 | 2.35E-07 | 1.66E-06 | 515 | 515 |
| ROR1      | 0.225517 | 2.31E-07 | 1.63E-06 | 515 | 515 |
| DENND5B   | 0.225534 | 2.31E-07 | 1.63E-06 | 515 | 515 |
| CHURC1    | 0.225554 | 2.30E-07 | 1.63E-06 | 515 | 515 |
| D4S234E   | 0.22556  | 2.30E-07 | 1.63E-06 | 515 | 514 |
| RFTN2     | 0.225583 | 2.30E-07 | 1.62E-06 | 515 | 515 |
| RAB3IL1   | 0.225756 | 2.25E-07 | 1.59E-06 | 515 | 515 |
| MXRA5     | 0.225776 | 2.24E-07 | 1.59E-06 | 515 | 515 |
| SERPINE2  | 0.225781 | 2.24E-07 | 1.59E-06 | 515 | 515 |
| DCBLD1    | 0.225851 | 2.22E-07 | 1.57E-06 | 515 | 515 |
| LGI4      | 0.225866 | 2.21E-07 | 1.57E-06 | 515 | 515 |
| PCDH18    | 0.225961 | 2.19E-07 | 1.55E-06 | 515 | 515 |
| ZNF85     | 0.225997 | 2.18E-07 | 1.55E-06 | 515 | 515 |
| MGAT3     | 0.226034 | 2.17E-07 | 1.54E-06 | 515 | 515 |
| PKD2      | 0.226043 | 2.17E-07 | 1.54E-06 | 515 | 515 |
| TINF2     | 0.226088 | 2.15E-07 | 1.53E-06 | 515 | 515 |
| ZNF583    | 0.226099 | 2.15E-07 | 1.53E-06 | 515 | 515 |
| MX2       | 0.226199 | 2.12E-07 | 1.51E-06 | 515 | 515 |
| LOC121952 | 0.226266 | 2.11E-07 | 1.50E-06 | 515 | 387 |
| LOC286002 | 0.226606 | 2.02E-07 | 1.44E-06 | 515 | 452 |
| TAF4B     | 0.226802 | 1.97E-07 | 1.41E-06 | 515 | 515 |
| UBE2D3    | 0.226914 | 1.94E-07 | 1.39E-06 | 515 | 515 |
| PACSIN1   | 0.226933 | 1.94E-07 | 1.38E-06 | 515 | 514 |
| LRRC70    | 0.227056 | 1.90E-07 | 1.36E-06 | 515 | 515 |
| ST3GAL6   | 0.22715  | 1.88E-07 | 1.35E-06 | 515 | 515 |
| GUCY1A3   | 0.227222 | 1.87E-07 | 1.34E-06 | 515 | 515 |
| ITGB3     | 0.227464 | 1.81E-07 | 1.30E-06 | 515 | 515 |
| FAM124B   | 0.227487 | 1.80E-07 | 1.29E-06 | 515 | 514 |
| KRT39     | 0.227502 | 1.80E-07 | 1.29E-06 | 515 | 386 |
| KCNQ5     | 0.227548 | 1.79E-07 | 1.28E-06 | 515 | 514 |
| MCOLN1    | 0.227569 | 1.78E-07 | 1.28E-06 | 515 | 515 |
| AP4B1     | 0.227604 | 1.78E-07 | 1.28E-06 | 515 | 515 |
| TPP1      | 0.22767  | 1.76E-07 | 1.27E-06 | 515 | 515 |
| MAP7D1    | 0.227675 | 1.76E-07 | 1.27E-06 | 515 | 515 |
| SLC39A8   | 0.227689 | 1.76E-07 | 1.26E-06 | 515 | 515 |
| FAT2      | 0.227798 | 1.73E-07 | 1.25E-06 | 515 | 512 |
| MTM1      | 0.227804 | 1.73E-07 | 1.25E-06 | 515 | 515 |
| LRRTM2    | 0.227884 | 1.71E-07 | 1.24E-06 | 515 | 503 |
| ATG12     | 0.227942 | 1.70E-07 | 1.23E-06 | 515 | 515 |
| TRIM55    | 0.227965 | 1.70E-07 | 1.22E-06 | 515 | 484 |
| ANTXR2    | 0.228012 | 1.69E-07 | 1.22E-06 | 515 | 515 |

|          |          |          |          |     |     |
|----------|----------|----------|----------|-----|-----|
| CXCL2    | 0.228013 | 1.69E-07 | 1.22E-06 | 515 | 515 |
| FCGR3B   | 0.228239 | 1.64E-07 | 1.19E-06 | 515 | 514 |
| CDC40    | 0.228287 | 1.63E-07 | 1.18E-06 | 515 | 515 |
| RNASE3   | 0.228392 | 1.61E-07 | 1.16E-06 | 515 | 405 |
| KLK1     | 0.228408 | 1.60E-07 | 1.16E-06 | 515 | 472 |
| HRH1     | 0.228433 | 1.60E-07 | 1.16E-06 | 515 | 515 |
| HIF1A    | 0.228556 | 1.57E-07 | 1.14E-06 | 515 | 515 |
| TMEM169  | 0.228682 | 1.55E-07 | 1.12E-06 | 515 | 515 |
| DZIP1L   | 0.228695 | 1.55E-07 | 1.12E-06 | 515 | 515 |
| ROBO1    | 0.228699 | 1.55E-07 | 1.12E-06 | 515 | 515 |
| VSIG1    | 0.228824 | 1.52E-07 | 1.10E-06 | 515 | 515 |
| RNF175   | 0.228848 | 1.52E-07 | 1.10E-06 | 515 | 512 |
| LINGO3   | 0.228887 | 1.51E-07 | 1.10E-06 | 515 | 353 |
| OMG      | 0.228977 | 1.49E-07 | 1.08E-06 | 515 | 501 |
| CDKN1B   | 0.22912  | 1.46E-07 | 1.07E-06 | 515 | 515 |
| TACC1    | 0.229297 | 1.43E-07 | 1.04E-06 | 515 | 515 |
| TRERF1   | 0.229311 | 1.43E-07 | 1.04E-06 | 515 | 515 |
| NETO1    | 0.229629 | 1.37E-07 | 1.00E-06 | 515 | 466 |
| SPATS2L  | 0.22984  | 1.33E-07 | 9.76E-07 | 515 | 515 |
| FOXN3    | 0.229892 | 1.33E-07 | 9.70E-07 | 515 | 515 |
| ADORA1   | 0.230034 | 1.30E-07 | 9.53E-07 | 515 | 515 |
| KIF5A    | 0.230073 | 1.30E-07 | 9.49E-07 | 515 | 464 |
| WISP2    | 0.230348 | 1.25E-07 | 9.17E-07 | 515 | 515 |
| RASSF1   | 0.230362 | 1.25E-07 | 9.15E-07 | 515 | 515 |
| HSPBAP1  | 0.23042  | 1.24E-07 | 9.09E-07 | 515 | 515 |
| STX2     | 0.230489 | 1.23E-07 | 9.02E-07 | 515 | 515 |
| ERG      | 0.230634 | 1.21E-07 | 8.85E-07 | 515 | 515 |
| ENOX1    | 0.230712 | 1.19E-07 | 8.77E-07 | 515 | 515 |
| KRT72    | 0.230735 | 1.19E-07 | 8.75E-07 | 515 | 176 |
| CHST2    | 0.230737 | 1.19E-07 | 8.75E-07 | 515 | 515 |
| C17orf99 | 0.230748 | 1.19E-07 | 8.74E-07 | 515 | 359 |
| PRKACB   | 0.230826 | 1.18E-07 | 8.65E-07 | 515 | 515 |
| ANGPTL2  | 0.230839 | 1.17E-07 | 8.65E-07 | 515 | 515 |
| CTSE     | 0.230873 | 1.17E-07 | 8.61E-07 | 515 | 513 |
| CPEB1    | 0.230881 | 1.17E-07 | 8.61E-07 | 515 | 487 |
| CLEC4GP1 | 0.230894 | 1.17E-07 | 8.59E-07 | 515 | 416 |
| C3orf64  | 0.231031 | 1.14E-07 | 8.45E-07 | 515 | 515 |
| SFTPA2   | 0.231083 | 1.14E-07 | 8.40E-07 | 515 | 515 |
| NR4A3    | 0.231185 | 1.12E-07 | 8.30E-07 | 515 | 515 |
| HELQ     | 0.231209 | 1.12E-07 | 8.27E-07 | 515 | 515 |
| MYCBP2   | 0.231217 | 1.12E-07 | 8.27E-07 | 515 | 515 |
| BCAS4    | 0.231302 | 1.11E-07 | 8.18E-07 | 515 | 515 |
| ATP8B2   | 0.231333 | 1.10E-07 | 8.15E-07 | 515 | 515 |
| JSRP1    | 0.231349 | 1.10E-07 | 8.14E-07 | 515 | 512 |
| MT1H     | 0.231437 | 1.09E-07 | 8.06E-07 | 515 | 467 |
| KIRREL   | 0.231505 | 1.08E-07 | 7.99E-07 | 515 | 515 |
| HSPB2    | 0.231536 | 1.07E-07 | 7.97E-07 | 515 | 515 |
| DENND5A  | 0.231683 | 1.05E-07 | 7.82E-07 | 515 | 515 |
| SLC26A4  | 0.231736 | 1.05E-07 | 7.78E-07 | 515 | 515 |
| SERTAD1  | 0.231845 | 1.03E-07 | 7.67E-07 | 515 | 515 |
| C6orf182 | 0.231846 | 1.03E-07 | 7.67E-07 | 515 | 515 |
| STX7     | 0.2319   | 1.02E-07 | 7.62E-07 | 515 | 515 |
| CHSY3    | 0.232015 | 1.01E-07 | 7.51E-07 | 515 | 515 |
| CDK17    | 0.232034 | 1.01E-07 | 7.50E-07 | 515 | 515 |

|           |          |          |          |     |     |
|-----------|----------|----------|----------|-----|-----|
| SFTPA1    | 0.232035 | 1.01E-07 | 7.50E-07 | 515 | 514 |
| ZNF548    | 0.232051 | 1.00E-07 | 7.49E-07 | 515 | 515 |
| LOC158376 | 0.232082 | 9.99E-08 | 7.46E-07 | 515 | 515 |
| TM4SF18   | 0.232096 | 9.97E-08 | 7.45E-07 | 515 | 515 |
| SIPA1     | 0.23215  | 9.90E-08 | 7.40E-07 | 515 | 515 |
| NPC2      | 0.23229  | 9.73E-08 | 7.27E-07 | 515 | 515 |
| MTMR8     | 0.232319 | 9.69E-08 | 7.25E-07 | 515 | 508 |
| CEND1     | 0.232351 | 9.65E-08 | 7.22E-07 | 515 | 501 |
| METTL7A   | 0.232414 | 9.57E-08 | 7.16E-07 | 515 | 515 |
| OAS1      | 0.23251  | 9.45E-08 | 7.08E-07 | 515 | 515 |
| FXYD6     | 0.232659 | 9.27E-08 | 6.94E-07 | 515 | 515 |
| ZBTB38    | 0.232938 | 8.94E-08 | 6.70E-07 | 515 | 515 |
| DCC       | 0.23306  | 8.80E-08 | 6.60E-07 | 515 | 470 |
| KIR3DL1   | 0.233062 | 8.79E-08 | 6.60E-07 | 515 | 365 |
| ENPP7     | 0.233086 | 8.77E-08 | 6.58E-07 | 515 | 270 |
| CCDC89    | 0.233102 | 8.75E-08 | 6.57E-07 | 515 | 514 |
| ZNF791    | 0.233132 | 8.71E-08 | 6.55E-07 | 515 | 515 |
| FAM7A2    | 0.233146 | 8.70E-08 | 6.54E-07 | 515 | 418 |
| ABCG1     | 0.233302 | 8.52E-08 | 6.41E-07 | 515 | 515 |
| TANK      | 0.233355 | 8.47E-08 | 6.37E-07 | 515 | 515 |
| AKIRIN2   | 0.233387 | 8.43E-08 | 6.34E-07 | 515 | 515 |
| TCEAL7    | 0.233389 | 8.43E-08 | 6.34E-07 | 515 | 514 |
| SLC30A4   | 0.23346  | 8.35E-08 | 6.29E-07 | 515 | 515 |
| KLRF1     | 0.233542 | 8.26E-08 | 6.23E-07 | 515 | 507 |
| FLRT2     | 0.233771 | 8.02E-08 | 6.05E-07 | 515 | 515 |
| PMCH      | 0.233801 | 7.99E-08 | 6.03E-07 | 515 | 465 |
| IL29      | 0.233805 | 7.98E-08 | 6.03E-07 | 515 | 289 |
| SCN7A     | 0.233851 | 7.93E-08 | 5.99E-07 | 515 | 514 |
| AKT3      | 0.233876 | 7.91E-08 | 5.98E-07 | 515 | 515 |
| SSH1      | 0.233937 | 7.84E-08 | 5.93E-07 | 515 | 515 |
| C11orf63  | 0.234079 | 7.70E-08 | 5.83E-07 | 515 | 515 |
| C20orf200 | 0.234108 | 7.67E-08 | 5.81E-07 | 515 | 383 |
| PKIA      | 0.234214 | 7.57E-08 | 5.73E-07 | 515 | 515 |
| NIPSNAP3E | 0.234284 | 7.50E-08 | 5.68E-07 | 515 | 515 |
| SOAT2     | 0.23437  | 7.41E-08 | 5.62E-07 | 515 | 364 |
| COL8A1    | 0.234381 | 7.40E-08 | 5.61E-07 | 515 | 515 |
| FAM126A   | 0.234408 | 7.37E-08 | 5.60E-07 | 515 | 515 |
| HDGFRP3   | 0.234429 | 7.35E-08 | 5.58E-07 | 515 | 515 |
| SNX6      | 0.234469 | 7.32E-08 | 5.56E-07 | 515 | 515 |
| NDP       | 0.234574 | 7.22E-08 | 5.48E-07 | 515 | 466 |
| TESK2     | 0.234585 | 7.20E-08 | 5.48E-07 | 515 | 515 |
| DCUN1D3   | 0.234613 | 7.18E-08 | 5.46E-07 | 515 | 515 |
| GADD45A   | 0.234823 | 6.98E-08 | 5.32E-07 | 515 | 515 |
| C12orf70  | 0.235095 | 6.74E-08 | 5.14E-07 | 515 | 434 |
| SCGB1A1   | 0.235095 | 6.74E-08 | 5.14E-07 | 515 | 498 |
| PLBD1     | 0.235151 | 6.69E-08 | 5.11E-07 | 515 | 515 |
| SLC15A4   | 0.235163 | 6.68E-08 | 5.10E-07 | 515 | 515 |
| S100A8    | 0.235352 | 6.51E-08 | 4.98E-07 | 515 | 515 |
| KIAA1033  | 0.235354 | 6.51E-08 | 4.98E-07 | 515 | 515 |
| SLC25A19  | 0.235402 | 6.47E-08 | 4.95E-07 | 515 | 515 |
| ZBTB25    | 0.235466 | 6.42E-08 | 4.91E-07 | 515 | 515 |
| C3orf42   | 0.23551  | 6.38E-08 | 4.89E-07 | 515 | 513 |
| ABCG2     | 0.23564  | 6.27E-08 | 4.81E-07 | 515 | 515 |
| JAKMIP2   | 0.235653 | 6.26E-08 | 4.80E-07 | 515 | 515 |



|           |          |          |          |     |     |
|-----------|----------|----------|----------|-----|-----|
| TMEM173   | 0.235797 | 6.14E-08 | 4.71E-07 | 515 | 515 |
| MMD       | 0.235849 | 6.10E-08 | 4.68E-07 | 515 | 515 |
| REC8      | 0.235887 | 6.07E-08 | 4.66E-07 | 515 | 515 |
| OR1D4     | 0.235904 | 6.06E-08 | 4.65E-07 | 515 | 44  |
| MFGE8     | 0.235975 | 6.00E-08 | 4.61E-07 | 515 | 515 |
| GJA5      | 0.236039 | 5.95E-08 | 4.58E-07 | 515 | 515 |
| PNPLA6    | 0.236099 | 5.90E-08 | 4.55E-07 | 515 | 515 |
| ADD3      | 0.236106 | 5.90E-08 | 4.54E-07 | 515 | 515 |
| GPR182    | 0.236187 | 5.83E-08 | 4.50E-07 | 515 | 490 |
| SVEP1     | 0.23622  | 5.81E-08 | 4.48E-07 | 515 | 515 |
| PLEKHG1   | 0.236249 | 5.79E-08 | 4.47E-07 | 515 | 515 |
| DRAM2     | 0.23625  | 5.78E-08 | 4.47E-07 | 515 | 515 |
| FBLN1     | 0.236285 | 5.76E-08 | 4.45E-07 | 515 | 515 |
| MYL4      | 0.236311 | 5.74E-08 | 4.44E-07 | 515 | 469 |
| TOR3A     | 0.236391 | 5.68E-08 | 4.39E-07 | 515 | 515 |
| SPRR2F    | 0.236393 | 5.68E-08 | 4.39E-07 | 515 | 261 |
| DUSP26    | 0.23654  | 5.57E-08 | 4.31E-07 | 515 | 504 |
| FHL3      | 0.236592 | 5.53E-08 | 4.28E-07 | 515 | 515 |
| TXNDC15   | 0.236599 | 5.52E-08 | 4.28E-07 | 515 | 515 |
| SGCG      | 0.236603 | 5.52E-08 | 4.28E-07 | 515 | 483 |
| PDLIM4    | 0.236816 | 5.37E-08 | 4.16E-07 | 515 | 515 |
| RAPGEF1   | 0.236953 | 5.27E-08 | 4.09E-07 | 515 | 515 |
| C17orf88  | 0.236988 | 5.25E-08 | 4.07E-07 | 515 | 299 |
| CA11      | 0.237157 | 5.13E-08 | 3.99E-07 | 515 | 515 |
| FLNA      | 0.237353 | 5.00E-08 | 3.89E-07 | 515 | 515 |
| PCYT1A    | 0.237394 | 4.97E-08 | 3.87E-07 | 515 | 515 |
| DNAJB14   | 0.237509 | 4.89E-08 | 3.82E-07 | 515 | 515 |
| C17orf44  | 0.237527 | 4.88E-08 | 3.81E-07 | 515 | 515 |
| COX7A1    | 0.237647 | 4.81E-08 | 3.76E-07 | 515 | 515 |
| UPP1      | 0.237667 | 4.79E-08 | 3.75E-07 | 515 | 515 |
| ADRBK2    | 0.23771  | 4.77E-08 | 3.73E-07 | 515 | 515 |
| VRK2      | 0.237726 | 4.76E-08 | 3.72E-07 | 515 | 515 |
| GAS1      | 0.237801 | 4.71E-08 | 3.69E-07 | 515 | 515 |
| LINS1     | 0.23797  | 4.60E-08 | 3.61E-07 | 515 | 515 |
| MAMLD1    | 0.237973 | 4.60E-08 | 3.61E-07 | 515 | 515 |
| RUNDC2C   | 0.238045 | 4.56E-08 | 3.58E-07 | 515 | 515 |
| SNAI2     | 0.238274 | 4.42E-08 | 3.48E-07 | 515 | 515 |
| TGFBR2    | 0.238398 | 4.35E-08 | 3.42E-07 | 515 | 515 |
| FCAMR     | 0.238472 | 4.30E-08 | 3.39E-07 | 515 | 461 |
| GNA15     | 0.238556 | 4.26E-08 | 3.36E-07 | 515 | 515 |
| AGTPBP1   | 0.238664 | 4.20E-08 | 3.31E-07 | 515 | 515 |
| ITGA8     | 0.238862 | 4.09E-08 | 3.23E-07 | 515 | 512 |
| LOC728743 | 0.238883 | 4.07E-08 | 3.22E-07 | 515 | 515 |
| CMTM7     | 0.238983 | 4.02E-08 | 3.18E-07 | 515 | 515 |
| OXER1     | 0.239009 | 4.01E-08 | 3.17E-07 | 515 | 515 |
| FAM65C    | 0.239021 | 4.00E-08 | 3.17E-07 | 515 | 515 |
| LIX1L     | 0.239101 | 3.96E-08 | 3.13E-07 | 515 | 515 |
| OMD       | 0.239104 | 3.96E-08 | 3.13E-07 | 515 | 514 |
| LRRN4CL   | 0.239199 | 3.91E-08 | 3.10E-07 | 515 | 515 |
| GPR124    | 0.239203 | 3.90E-08 | 3.10E-07 | 515 | 515 |
| FBN1      | 0.239215 | 3.90E-08 | 3.09E-07 | 515 | 515 |
| EBF1      | 0.239228 | 3.89E-08 | 3.09E-07 | 515 | 515 |
| C11orf46  | 0.239301 | 3.85E-08 | 3.06E-07 | 515 | 515 |
| WT1       | 0.239464 | 3.77E-08 | 3.00E-07 | 515 | 461 |

|          |          |          |          |     |     |
|----------|----------|----------|----------|-----|-----|
| SPHK1    | 0.239471 | 3.77E-08 | 3.00E-07 | 515 | 515 |
| CREB5    | 0.239474 | 3.76E-08 | 3.00E-07 | 515 | 515 |
| LRRC18   | 0.239492 | 3.75E-08 | 2.99E-07 | 515 | 466 |
| ZNF439   | 0.239549 | 3.73E-08 | 2.97E-07 | 515 | 515 |
| ROS1     | 0.239714 | 3.64E-08 | 2.91E-07 | 515 | 515 |
| ZNF530   | 0.2399   | 3.55E-08 | 2.84E-07 | 515 | 515 |
| PRKG1    | 0.239967 | 3.52E-08 | 2.82E-07 | 515 | 515 |
| OLFML3   | 0.240009 | 3.50E-08 | 2.80E-07 | 515 | 515 |
| LRRC55   | 0.240191 | 3.42E-08 | 2.74E-07 | 515 | 503 |
| TIAM2    | 0.240192 | 3.42E-08 | 2.74E-07 | 515 | 515 |
| AOC3     | 0.240255 | 3.39E-08 | 2.72E-07 | 515 | 515 |
| CPNE7    | 0.240618 | 3.23E-08 | 2.59E-07 | 515 | 515 |
| THY1     | 0.240683 | 3.20E-08 | 2.57E-07 | 515 | 515 |
| TPRG1    | 0.24073  | 3.18E-08 | 2.55E-07 | 515 | 515 |
| PMAIP1   | 0.240761 | 3.17E-08 | 2.54E-07 | 515 | 515 |
| RELL1    | 0.240998 | 3.07E-08 | 2.47E-07 | 515 | 515 |
| CDK14    | 0.241004 | 3.06E-08 | 2.46E-07 | 515 | 515 |
| FIBIN    | 0.241043 | 3.05E-08 | 2.45E-07 | 515 | 515 |
| UNC5C    | 0.241109 | 3.02E-08 | 2.44E-07 | 515 | 512 |
| GGT5     | 0.241173 | 2.99E-08 | 2.41E-07 | 515 | 515 |
| COL3A1   | 0.241408 | 2.90E-08 | 2.34E-07 | 515 | 515 |
| PLSCR4   | 0.241689 | 2.79E-08 | 2.26E-07 | 515 | 515 |
| TLE4     | 0.2417   | 2.79E-08 | 2.26E-07 | 515 | 515 |
| MIXL1    | 0.241716 | 2.78E-08 | 2.25E-07 | 515 | 417 |
| MERTK    | 0.241747 | 2.77E-08 | 2.24E-07 | 515 | 515 |
| GP5      | 0.241991 | 2.68E-08 | 2.17E-07 | 515 | 487 |
| WDR41    | 0.242003 | 2.68E-08 | 2.17E-07 | 515 | 515 |
| ABCA10   | 0.242087 | 2.64E-08 | 2.15E-07 | 515 | 511 |
| IRGM     | 0.242344 | 2.55E-08 | 2.08E-07 | 515 | 322 |
| TPTE2    | 0.242345 | 2.55E-08 | 2.08E-07 | 515 | 399 |
| PGR      | 0.242413 | 2.53E-08 | 2.06E-07 | 515 | 515 |
| EMP1     | 0.242786 | 2.41E-08 | 1.96E-07 | 515 | 515 |
| PIK3R1   | 0.242811 | 2.40E-08 | 1.96E-07 | 515 | 515 |
| FCHSD1   | 0.243246 | 2.26E-08 | 1.85E-07 | 515 | 515 |
| RRN3P1   | 0.243269 | 2.25E-08 | 1.84E-07 | 515 | 515 |
| TMCC3    | 0.2433   | 2.24E-08 | 1.84E-07 | 515 | 515 |
| TP53INP1 | 0.243419 | 2.21E-08 | 1.81E-07 | 515 | 515 |
| PIPOX    | 0.243451 | 2.20E-08 | 1.80E-07 | 515 | 515 |
| DUSP5    | 0.243579 | 2.16E-08 | 1.77E-07 | 515 | 515 |
| ZNF100   | 0.243638 | 2.14E-08 | 1.76E-07 | 515 | 515 |
| AREG     | 0.243677 | 2.13E-08 | 1.75E-07 | 515 | 515 |
| CYYR1    | 0.243692 | 2.13E-08 | 1.75E-07 | 515 | 515 |
| CXorf42  | 0.24376  | 2.11E-08 | 1.73E-07 | 515 | 515 |
| CACNA1I  | 0.243761 | 2.11E-08 | 1.73E-07 | 515 | 511 |
| LSM6     | 0.243777 | 2.10E-08 | 1.73E-07 | 515 | 515 |
| MEOX2    | 0.243823 | 2.09E-08 | 1.72E-07 | 515 | 515 |
| IL12A    | 0.243854 | 2.08E-08 | 1.71E-07 | 515 | 513 |
| ACTR2    | 0.243913 | 2.06E-08 | 1.70E-07 | 515 | 515 |
| TAB2     | 0.243985 | 2.04E-08 | 1.69E-07 | 515 | 515 |
| FCN3     | 0.243989 | 2.04E-08 | 1.69E-07 | 515 | 513 |
| STOM     | 0.244004 | 2.04E-08 | 1.68E-07 | 515 | 515 |
| SEC22C   | 0.244113 | 2.01E-08 | 1.66E-07 | 515 | 515 |
| CEP135   | 0.244209 | 1.98E-08 | 1.64E-07 | 515 | 515 |
| NLRP7    | 0.244408 | 1.93E-08 | 1.60E-07 | 515 | 500 |

|           |          |          |          |     |     |
|-----------|----------|----------|----------|-----|-----|
| LRRC15    | 0.244611 | 1.87E-08 | 1.55E-07 | 515 | 515 |
| DEGS1     | 0.24462  | 1.87E-08 | 1.55E-07 | 515 | 515 |
| C12orf63  | 0.244652 | 1.86E-08 | 1.55E-07 | 515 | 490 |
| ELF4      | 0.244714 | 1.85E-08 | 1.54E-07 | 515 | 515 |
| SUMO1P1   | 0.244781 | 1.83E-08 | 1.52E-07 | 515 | 378 |
| PDLIM2    | 0.244788 | 1.83E-08 | 1.52E-07 | 515 | 515 |
| ARHGAP22  | 0.244816 | 1.82E-08 | 1.52E-07 | 515 | 515 |
| TMEM109   | 0.244853 | 1.81E-08 | 1.51E-07 | 515 | 515 |
| CLIC5     | 0.244868 | 1.81E-08 | 1.51E-07 | 515 | 515 |
| KCNS2     | 0.244944 | 1.79E-08 | 1.49E-07 | 515 | 466 |
| HLX       | 0.244997 | 1.78E-08 | 1.48E-07 | 515 | 515 |
| TMEM37    | 0.245031 | 1.77E-08 | 1.48E-07 | 515 | 515 |
| NPHS1     | 0.245212 | 1.73E-08 | 1.44E-07 | 515 | 415 |
| ACER1     | 0.245217 | 1.72E-08 | 1.44E-07 | 515 | 203 |
| PCDHGA12  | 0.245312 | 1.70E-08 | 1.42E-07 | 515 | 514 |
| HELB      | 0.245412 | 1.68E-08 | 1.40E-07 | 515 | 515 |
| PLN       | 0.245533 | 1.65E-08 | 1.38E-07 | 515 | 515 |
| CAP1      | 0.245708 | 1.61E-08 | 1.35E-07 | 515 | 515 |
| SERPINA1  | 0.245799 | 1.59E-08 | 1.33E-07 | 515 | 515 |
| LPCAT2    | 0.245891 | 1.57E-08 | 1.32E-07 | 515 | 515 |
| FAM70B    | 0.245946 | 1.56E-08 | 1.31E-07 | 515 | 515 |
| CERKL     | 0.246019 | 1.54E-08 | 1.30E-07 | 515 | 515 |
| CNN3      | 0.246088 | 1.53E-08 | 1.29E-07 | 515 | 515 |
| SLCO3A1   | 0.246327 | 1.48E-08 | 1.25E-07 | 515 | 515 |
| MSRB3     | 0.246462 | 1.45E-08 | 1.22E-07 | 515 | 515 |
| LOC283731 | 0.246493 | 1.45E-08 | 1.22E-07 | 515 | 496 |
| FSD1      | 0.246635 | 1.42E-08 | 1.20E-07 | 515 | 500 |
| MBP       | 0.246654 | 1.41E-08 | 1.19E-07 | 515 | 515 |
| C14orf159 | 0.246732 | 1.40E-08 | 1.18E-07 | 515 | 515 |
| SSH2      | 0.246821 | 1.38E-08 | 1.17E-07 | 515 | 515 |
| AGXT2L2   | 0.246842 | 1.38E-08 | 1.16E-07 | 515 | 515 |
| FRG1      | 0.246898 | 1.37E-08 | 1.16E-07 | 515 | 515 |
| ME2       | 0.246932 | 1.36E-08 | 1.15E-07 | 515 | 515 |
| DNPEP     | 0.246973 | 1.35E-08 | 1.15E-07 | 515 | 515 |
| AMZ1      | 0.246987 | 1.35E-08 | 1.14E-07 | 515 | 513 |
| CRLF2     | 0.247112 | 1.33E-08 | 1.12E-07 | 515 | 387 |
| ZMYND15   | 0.247129 | 1.32E-08 | 1.12E-07 | 515 | 515 |
| C19orf12  | 0.247185 | 1.31E-08 | 1.11E-07 | 515 | 515 |
| OAZ1      | 0.247207 | 1.31E-08 | 1.11E-07 | 515 | 515 |
| ANXA5     | 0.247258 | 1.30E-08 | 1.10E-07 | 515 | 515 |
| PGCP      | 0.247325 | 1.29E-08 | 1.10E-07 | 515 | 515 |
| LAMP3     | 0.247327 | 1.29E-08 | 1.10E-07 | 515 | 515 |
| EMB       | 0.247328 | 1.29E-08 | 1.10E-07 | 515 | 515 |
| KIF2A     | 0.247461 | 1.26E-08 | 1.08E-07 | 515 | 515 |
| C15orf51  | 0.247656 | 1.23E-08 | 1.05E-07 | 515 | 467 |
| FAM198A   | 0.247789 | 1.21E-08 | 1.03E-07 | 515 | 515 |
| ADCY7     | 0.247915 | 1.19E-08 | 1.01E-07 | 515 | 515 |
| CCDC90B   | 0.247948 | 1.18E-08 | 1.01E-07 | 515 | 515 |
| CD58      | 0.247975 | 1.18E-08 | 1.01E-07 | 515 | 515 |
| IQCG      | 0.248023 | 1.17E-08 | 1.00E-07 | 515 | 515 |
| NFKB2     | 0.248046 | 1.17E-08 | 9.97E-08 | 515 | 515 |
| DACT1     | 0.248311 | 1.12E-08 | 9.62E-08 | 515 | 515 |
| CDK15     | 0.248314 | 1.12E-08 | 9.62E-08 | 515 | 418 |
| PLAC8     | 0.248332 | 1.12E-08 | 9.60E-08 | 515 | 515 |

|           |          |          |          |     |     |
|-----------|----------|----------|----------|-----|-----|
| CTSL1     | 0.248521 | 1.09E-08 | 9.36E-08 | 515 | 515 |
| CMTM1     | 0.248695 | 1.06E-08 | 9.15E-08 | 515 | 515 |
| DGKG      | 0.248769 | 1.05E-08 | 9.06E-08 | 515 | 515 |
| CAPZA1    | 0.248776 | 1.05E-08 | 9.06E-08 | 515 | 515 |
| NRN1      | 0.248842 | 1.04E-08 | 8.98E-08 | 515 | 515 |
| GAS6      | 0.248951 | 1.03E-08 | 8.85E-08 | 515 | 515 |
| ABLIM3    | 0.248996 | 1.02E-08 | 8.80E-08 | 515 | 515 |
| TMEM176A  | 0.249014 | 1.02E-08 | 8.78E-08 | 515 | 515 |
| PLK3      | 0.249059 | 1.01E-08 | 8.73E-08 | 515 | 515 |
| MALT1     | 0.249099 | 1.01E-08 | 8.69E-08 | 515 | 515 |
| ADH1B     | 0.249134 | 1.00E-08 | 8.65E-08 | 515 | 509 |
| TRPS1     | 0.249304 | 9.77E-09 | 8.45E-08 | 515 | 515 |
| SNAI1     | 0.24945  | 9.57E-09 | 8.28E-08 | 515 | 515 |
| CLIP3     | 0.249471 | 9.54E-09 | 8.26E-08 | 515 | 515 |
| WDR64     | 0.249565 | 9.42E-09 | 8.17E-08 | 515 | 401 |
| C3        | 0.249612 | 9.36E-09 | 8.12E-08 | 515 | 515 |
| ARL10     | 0.249686 | 9.26E-09 | 8.04E-08 | 515 | 514 |
| SGCD      | 0.249691 | 9.25E-09 | 8.04E-08 | 515 | 515 |
| EFEMP1    | 0.249717 | 9.22E-09 | 8.01E-08 | 515 | 515 |
| ZNF582    | 0.249766 | 9.16E-09 | 7.96E-08 | 515 | 515 |
| RASGRF1   | 0.250361 | 8.42E-09 | 7.33E-08 | 515 | 515 |
| ITIH1     | 0.250435 | 8.34E-09 | 7.25E-08 | 515 | 361 |
| ANO6      | 0.250528 | 8.23E-09 | 7.16E-08 | 515 | 515 |
| EIF5A2    | 0.250544 | 8.21E-09 | 7.15E-08 | 515 | 515 |
| HIC1      | 0.25062  | 8.12E-09 | 7.08E-08 | 515 | 515 |
| LOC399959 | 0.250688 | 8.04E-09 | 7.01E-08 | 515 | 515 |
| KLHL5     | 0.25069  | 8.04E-09 | 7.01E-08 | 515 | 515 |
| TMEM155   | 0.250698 | 8.03E-09 | 7.01E-08 | 515 | 498 |
| EGOT      | 0.250847 | 7.87E-09 | 6.87E-08 | 515 | 476 |
| P2RX2     | 0.250968 | 7.73E-09 | 6.76E-08 | 515 | 431 |
| NAGA      | 0.25109  | 7.60E-09 | 6.65E-08 | 515 | 515 |
| NAP1L3    | 0.25113  | 7.56E-09 | 6.61E-08 | 515 | 515 |
| CLIC4     | 0.25125  | 7.43E-09 | 6.50E-08 | 515 | 515 |
| LIPC      | 0.251467 | 7.21E-09 | 6.31E-08 | 515 | 501 |
| IFITM1    | 0.251562 | 7.11E-09 | 6.23E-08 | 515 | 515 |
| LRRC2     | 0.251576 | 7.09E-09 | 6.22E-08 | 515 | 513 |
| MAP3K1    | 0.251707 | 6.97E-09 | 6.12E-08 | 515 | 515 |
| MGAT4A    | 0.25171  | 6.96E-09 | 6.12E-08 | 515 | 515 |
| LRRC32    | 0.251777 | 6.90E-09 | 6.06E-08 | 515 | 515 |
| LOC254559 | 0.251813 | 6.86E-09 | 6.04E-08 | 515 | 514 |
| WNT10B    | 0.251854 | 6.82E-09 | 6.00E-08 | 515 | 513 |
| SDS       | 0.251868 | 6.81E-09 | 5.99E-08 | 515 | 515 |
| CYBA      | 0.251891 | 6.79E-09 | 5.98E-08 | 515 | 515 |
| FABP4     | 0.251927 | 6.75E-09 | 5.95E-08 | 515 | 511 |
| ACER3     | 0.251968 | 6.71E-09 | 5.92E-08 | 515 | 515 |
| FAM49B    | 0.252092 | 6.59E-09 | 5.82E-08 | 515 | 515 |
| SLC18A2   | 0.252158 | 6.53E-09 | 5.77E-08 | 515 | 510 |
| SLC40A1   | 0.252288 | 6.41E-09 | 5.67E-08 | 515 | 515 |
| FN1       | 0.252301 | 6.40E-09 | 5.66E-08 | 515 | 515 |
| MBNL3     | 0.252303 | 6.40E-09 | 5.66E-08 | 515 | 514 |
| ZNF383    | 0.252321 | 6.38E-09 | 5.65E-08 | 515 | 515 |
| RP2       | 0.25235  | 6.36E-09 | 5.63E-08 | 515 | 515 |
| DUSP3     | 0.252402 | 6.31E-09 | 5.59E-08 | 515 | 515 |
| DPYS      | 0.252428 | 6.29E-09 | 5.58E-08 | 515 | 471 |

|           |          |          |          |     |     |
|-----------|----------|----------|----------|-----|-----|
| MTMR6     | 0.252453 | 6.27E-09 | 5.56E-08 | 515 | 515 |
| C12orf5   | 0.252484 | 6.24E-09 | 5.54E-08 | 515 | 515 |
| ANXA8     | 0.252555 | 6.18E-09 | 5.49E-08 | 515 | 511 |
| BTN2A3    | 0.252619 | 6.12E-09 | 5.44E-08 | 515 | 515 |
| NFKBIZ    | 0.25264  | 6.10E-09 | 5.43E-08 | 515 | 515 |
| RNF19B    | 0.25264  | 6.10E-09 | 5.43E-08 | 515 | 515 |
| SDCBP     | 0.252702 | 6.05E-09 | 5.39E-08 | 515 | 515 |
| TMEM19    | 0.252791 | 5.97E-09 | 5.32E-08 | 515 | 515 |
| GSDMA     | 0.252842 | 5.93E-09 | 5.29E-08 | 515 | 513 |
| MYBL1     | 0.252844 | 5.93E-09 | 5.29E-08 | 515 | 515 |
| BBS12     | 0.253188 | 5.64E-09 | 5.04E-08 | 515 | 515 |
| GCH1      | 0.2534   | 5.48E-09 | 4.89E-08 | 515 | 515 |
| FOXF1     | 0.253401 | 5.47E-09 | 4.89E-08 | 515 | 515 |
| ODZ3      | 0.253501 | 5.40E-09 | 4.83E-08 | 515 | 514 |
| GUCY1B3   | 0.253545 | 5.36E-09 | 4.80E-08 | 515 | 515 |
| NIPSNAP3A | 0.25371  | 5.24E-09 | 4.69E-08 | 515 | 515 |
| TSHZ2     | 0.253717 | 5.23E-09 | 4.69E-08 | 515 | 515 |
| ITGA1     | 0.253785 | 5.18E-09 | 4.65E-08 | 515 | 515 |
| CNIH3     | 0.253891 | 5.10E-09 | 4.58E-08 | 515 | 515 |
| PLAGL1    | 0.253972 | 5.05E-09 | 4.53E-08 | 515 | 515 |
| POM121L9F | 0.253988 | 5.03E-09 | 4.52E-08 | 515 | 515 |
| TMEM154   | 0.25403  | 5.00E-09 | 4.50E-08 | 515 | 515 |
| RIPK3     | 0.254444 | 4.72E-09 | 4.25E-08 | 515 | 515 |
| SRPX2     | 0.254582 | 4.62E-09 | 4.16E-08 | 515 | 515 |
| LRCH1     | 0.254717 | 4.54E-09 | 4.09E-08 | 515 | 515 |
| ATXN1     | 0.25473  | 4.53E-09 | 4.08E-08 | 515 | 515 |
| C13orf30  | 0.254842 | 4.45E-09 | 4.02E-08 | 515 | 495 |
| BET3L     | 0.254884 | 4.43E-09 | 4.00E-08 | 515 | 343 |
| OLFM1     | 0.2549   | 4.42E-09 | 3.99E-08 | 515 | 515 |
| LMOD3     | 0.255001 | 4.35E-09 | 3.94E-08 | 515 | 509 |
| DENND3    | 0.255003 | 4.35E-09 | 3.94E-08 | 515 | 515 |
| MYH15     | 0.255011 | 4.35E-09 | 3.93E-08 | 515 | 498 |
| PTRF      | 0.255093 | 4.30E-09 | 3.89E-08 | 515 | 515 |
| C14orf145 | 0.255125 | 4.28E-09 | 3.87E-08 | 515 | 515 |
| SRGAP3    | 0.255314 | 4.16E-09 | 3.78E-08 | 515 | 515 |
| IL10RB    | 0.255375 | 4.13E-09 | 3.75E-08 | 515 | 515 |
| CYP27B1   | 0.255509 | 4.05E-09 | 3.68E-08 | 515 | 515 |
| C4orf50   | 0.255615 | 3.99E-09 | 3.62E-08 | 515 | 348 |
| ACP2      | 0.25571  | 3.93E-09 | 3.57E-08 | 515 | 515 |
| DCLRE1B   | 0.255794 | 3.88E-09 | 3.53E-08 | 515 | 515 |
| AKR1B1    | 0.255808 | 3.88E-09 | 3.53E-08 | 515 | 515 |
| CD5L      | 0.255871 | 3.84E-09 | 3.50E-08 | 515 | 385 |
| TBC1D9    | 0.255871 | 3.84E-09 | 3.50E-08 | 515 | 515 |
| TIMP1     | 0.256264 | 3.63E-09 | 3.31E-08 | 515 | 515 |
| LBH       | 0.256415 | 3.55E-09 | 3.24E-08 | 515 | 515 |
| TBC1D1    | 0.25643  | 3.54E-09 | 3.24E-08 | 515 | 515 |
| GNG10     | 0.256505 | 3.51E-09 | 3.20E-08 | 515 | 515 |
| ADAMTS8   | 0.256536 | 3.49E-09 | 3.19E-08 | 515 | 514 |
| RASSF8    | 0.256613 | 3.45E-09 | 3.16E-08 | 515 | 515 |
| NECAB1    | 0.256697 | 3.41E-09 | 3.12E-08 | 515 | 515 |
| SFXN3     | 0.256834 | 3.34E-09 | 3.06E-08 | 515 | 515 |
| UNC13D    | 0.256897 | 3.31E-09 | 3.03E-08 | 515 | 515 |
| LRRK2     | 0.256967 | 3.28E-09 | 3.00E-08 | 515 | 515 |
| APLF      | 0.257086 | 3.22E-09 | 2.96E-08 | 515 | 515 |

|           |          |          |          |     |     |
|-----------|----------|----------|----------|-----|-----|
| TMEM90A   | 0.25712  | 3.21E-09 | 2.94E-08 | 515 | 498 |
| PHF15     | 0.257277 | 3.13E-09 | 2.88E-08 | 515 | 515 |
| HERC3     | 0.257474 | 3.05E-09 | 2.80E-08 | 515 | 515 |
| MT1M      | 0.257514 | 3.03E-09 | 2.78E-08 | 515 | 513 |
| TNIK      | 0.25752  | 3.03E-09 | 2.78E-08 | 515 | 515 |
| ANGPTL7   | 0.257604 | 2.99E-09 | 2.75E-08 | 515 | 373 |
| PCMT1     | 0.257709 | 2.94E-09 | 2.71E-08 | 515 | 515 |
| VDR       | 0.257733 | 2.93E-09 | 2.70E-08 | 515 | 515 |
| HS3ST2    | 0.257839 | 2.89E-09 | 2.66E-08 | 515 | 515 |
| TIMP2     | 0.257849 | 2.88E-09 | 2.66E-08 | 515 | 515 |
| FIG4      | 0.257946 | 2.84E-09 | 2.63E-08 | 515 | 515 |
| GNPTAB    | 0.257956 | 2.84E-09 | 2.62E-08 | 515 | 515 |
| KCNK12    | 0.258139 | 2.77E-09 | 2.56E-08 | 515 | 483 |
| MAP3K8    | 0.258212 | 2.74E-09 | 2.53E-08 | 515 | 515 |
| MMRN1     | 0.258294 | 2.70E-09 | 2.50E-08 | 515 | 515 |
| ADRB3     | 0.258646 | 2.57E-09 | 2.38E-08 | 515 | 438 |
| PABPC5    | 0.25868  | 2.56E-09 | 2.37E-08 | 515 | 513 |
| JAM2      | 0.258781 | 2.52E-09 | 2.34E-08 | 515 | 515 |
| ZMYM6     | 0.258794 | 2.51E-09 | 2.33E-08 | 515 | 515 |
| TTC39B    | 0.258915 | 2.47E-09 | 2.29E-08 | 515 | 515 |
| CCL26     | 0.25901  | 2.44E-09 | 2.26E-08 | 515 | 467 |
| JAK1      | 0.259036 | 2.43E-09 | 2.26E-08 | 515 | 515 |
| HEG1      | 0.259137 | 2.39E-09 | 2.22E-08 | 515 | 515 |
| TWIST2    | 0.259169 | 2.38E-09 | 2.21E-08 | 515 | 510 |
| CETP      | 0.259213 | 2.36E-09 | 2.20E-08 | 515 | 514 |
| NCRNA0012 | 0.259273 | 2.34E-09 | 2.18E-08 | 515 | 515 |
| MYADM     | 0.259277 | 2.34E-09 | 2.18E-08 | 515 | 515 |
| OSBPL8    | 0.259295 | 2.34E-09 | 2.18E-08 | 515 | 515 |
| SLC38A6   | 0.259412 | 2.30E-09 | 2.14E-08 | 515 | 515 |
| PRDM8     | 0.25947  | 2.28E-09 | 2.13E-08 | 515 | 515 |
| GH1       | 0.25965  | 2.22E-09 | 2.07E-08 | 515 | 195 |
| ZNF441    | 0.259675 | 2.21E-09 | 2.07E-08 | 515 | 515 |
| ELK3      | 0.259704 | 2.20E-09 | 2.06E-08 | 515 | 515 |
| SGIP1     | 0.259838 | 2.16E-09 | 2.02E-08 | 515 | 515 |
| VAMP5     | 0.259919 | 2.13E-09 | 2.00E-08 | 515 | 515 |
| FABP3     | 0.260028 | 2.10E-09 | 1.97E-08 | 515 | 515 |
| MS4A3     | 0.260114 | 2.07E-09 | 1.95E-08 | 515 | 223 |
| MIER1     | 0.260147 | 2.06E-09 | 1.94E-08 | 515 | 515 |
| RAP1GDS1  | 0.260156 | 2.06E-09 | 1.94E-08 | 515 | 515 |
| CYFIP2    | 0.260269 | 2.03E-09 | 1.91E-08 | 515 | 515 |
| CACNA2D1  | 0.260429 | 1.98E-09 | 1.86E-08 | 515 | 508 |
| PPT1      | 0.260436 | 1.98E-09 | 1.86E-08 | 515 | 515 |
| CRYBA4    | 0.260492 | 1.96E-09 | 1.85E-08 | 515 | 314 |
| CYBASC3   | 0.260587 | 1.93E-09 | 1.82E-08 | 515 | 515 |
| ZNF700    | 0.260595 | 1.93E-09 | 1.82E-08 | 515 | 515 |
| TCTEX1D1  | 0.260639 | 1.92E-09 | 1.81E-08 | 515 | 515 |
| SERPINF1  | 0.260643 | 1.92E-09 | 1.81E-08 | 515 | 515 |
| SIDT1     | 0.260724 | 1.89E-09 | 1.79E-08 | 515 | 515 |
| C20orf123 | 0.260857 | 1.86E-09 | 1.76E-08 | 515 | 275 |
| PDE5A     | 0.260867 | 1.86E-09 | 1.76E-08 | 515 | 515 |
| ARNTL     | 0.260921 | 1.84E-09 | 1.74E-08 | 515 | 515 |
| PPP4R4    | 0.261065 | 1.80E-09 | 1.71E-08 | 515 | 498 |
| CRISPLD2  | 0.261135 | 1.78E-09 | 1.69E-08 | 515 | 515 |
| SFTPC     | 0.261237 | 1.76E-09 | 1.67E-08 | 515 | 510 |

|           |          |          |          |     |     |
|-----------|----------|----------|----------|-----|-----|
| ROR2      | 0.26138  | 1.72E-09 | 1.63E-08 | 515 | 515 |
| EMID2     | 0.26151  | 1.69E-09 | 1.60E-08 | 515 | 510 |
| C15orf48  | 0.261539 | 1.68E-09 | 1.60E-08 | 515 | 515 |
| VOPP1     | 0.261551 | 1.68E-09 | 1.60E-08 | 515 | 515 |
| ZFPM2     | 0.261589 | 1.67E-09 | 1.59E-08 | 515 | 515 |
| CELF2     | 0.261737 | 1.63E-09 | 1.56E-08 | 515 | 515 |
| PPWD1     | 0.261945 | 1.58E-09 | 1.51E-08 | 515 | 515 |
| LMCD1     | 0.262013 | 1.57E-09 | 1.50E-08 | 515 | 515 |
| CXCR2     | 0.262074 | 1.55E-09 | 1.48E-08 | 515 | 514 |
| NTRK3     | 0.262126 | 1.54E-09 | 1.47E-08 | 515 | 507 |
| SGK1      | 0.262295 | 1.50E-09 | 1.44E-08 | 515 | 515 |
| RUNX1T1   | 0.262316 | 1.50E-09 | 1.44E-08 | 515 | 512 |
| RNF149    | 0.262485 | 1.46E-09 | 1.40E-08 | 515 | 515 |
| HMSD      | 0.262542 | 1.45E-09 | 1.39E-08 | 515 | 453 |
| CCBE1     | 0.262636 | 1.43E-09 | 1.37E-08 | 515 | 511 |
| SIGLEC12  | 0.262659 | 1.42E-09 | 1.37E-08 | 515 | 511 |
| ATP1B3    | 0.262664 | 1.42E-09 | 1.37E-08 | 515 | 515 |
| ZNF365    | 0.262786 | 1.40E-09 | 1.35E-08 | 515 | 515 |
| TUBA1A    | 0.262828 | 1.39E-09 | 1.34E-08 | 515 | 515 |
| RIMBP3    | 0.262942 | 1.36E-09 | 1.32E-08 | 515 | 515 |
| SLC6A20   | 0.262965 | 1.36E-09 | 1.31E-08 | 515 | 509 |
| DMXL1     | 0.263007 | 1.35E-09 | 1.31E-08 | 515 | 515 |
| THSD1     | 0.263051 | 1.34E-09 | 1.30E-08 | 515 | 515 |
| CCL7      | 0.263206 | 1.31E-09 | 1.27E-08 | 515 | 485 |
| SIAH3     | 0.263254 | 1.30E-09 | 1.26E-08 | 515 | 430 |
| LYVE1     | 0.263274 | 1.30E-09 | 1.26E-08 | 515 | 515 |
| SLC31A1   | 0.263363 | 1.28E-09 | 1.24E-08 | 515 | 515 |
| CYTH1     | 0.263391 | 1.28E-09 | 1.24E-08 | 515 | 515 |
| GRASP     | 0.263496 | 1.26E-09 | 1.22E-08 | 515 | 515 |
| CAMK2A    | 0.263586 | 1.24E-09 | 1.20E-08 | 515 | 509 |
| LOC100132 | 0.263691 | 1.22E-09 | 1.19E-08 | 515 | 515 |
| P2RY6     | 0.263825 | 1.20E-09 | 1.16E-08 | 515 | 515 |
| PKD2L1    | 0.263825 | 1.20E-09 | 1.16E-08 | 515 | 504 |
| DHX58     | 0.263931 | 1.18E-09 | 1.15E-08 | 515 | 515 |
| SCML1     | 0.26394  | 1.18E-09 | 1.14E-08 | 515 | 515 |
| PTGIS     | 0.263993 | 1.17E-09 | 1.14E-08 | 515 | 515 |
| HMGN4     | 0.264025 | 1.16E-09 | 1.13E-08 | 515 | 515 |
| STAT5B    | 0.26405  | 1.16E-09 | 1.13E-08 | 515 | 515 |
| CCNA1     | 0.264071 | 1.15E-09 | 1.13E-08 | 515 | 485 |
| UPB1      | 0.264154 | 1.14E-09 | 1.11E-08 | 515 | 500 |
| ZNF521    | 0.264277 | 1.12E-09 | 1.09E-08 | 515 | 515 |
| PI4K2A    | 0.264578 | 1.07E-09 | 1.05E-08 | 515 | 515 |
| UBA6      | 0.264592 | 1.07E-09 | 1.04E-08 | 515 | 515 |
| FAM19A1   | 0.264602 | 1.07E-09 | 1.04E-08 | 515 | 414 |
| PHEX      | 0.26461  | 1.06E-09 | 1.04E-08 | 515 | 503 |
| CENPP     | 0.264744 | 1.04E-09 | 1.02E-08 | 515 | 515 |
| GGA2      | 0.264775 | 1.04E-09 | 1.02E-08 | 515 | 515 |
| CASP12    | 0.264981 | 1.01E-09 | 9.87E-09 | 515 | 449 |
| ACTR3     | 0.264991 | 1.01E-09 | 9.86E-09 | 515 | 515 |
| MUSK      | 0.265052 | 9.96E-10 | 9.78E-09 | 515 | 398 |
| SFT2D2    | 0.265126 | 9.85E-10 | 9.67E-09 | 515 | 515 |
| LAMA4     | 0.265195 | 9.75E-10 | 9.58E-09 | 515 | 515 |
| PDK1      | 0.265329 | 9.56E-10 | 9.39E-09 | 515 | 515 |
| GREM1     | 0.26537  | 9.50E-10 | 9.35E-09 | 515 | 514 |

|           |          |          |          |     |     |
|-----------|----------|----------|----------|-----|-----|
| CPNE9     | 0.265423 | 9.43E-10 | 9.28E-09 | 515 | 442 |
| GPR176    | 0.265433 | 9.41E-10 | 9.27E-09 | 515 | 514 |
| MRVI1     | 0.265625 | 9.14E-10 | 9.01E-09 | 515 | 515 |
| CKLF      | 0.265734 | 9.00E-10 | 8.87E-09 | 515 | 515 |
| ANXA8L2   | 0.265747 | 8.98E-10 | 8.86E-09 | 515 | 501 |
| COR07     | 0.265877 | 8.80E-10 | 8.69E-09 | 515 | 515 |
| PI16      | 0.266053 | 8.57E-10 | 8.48E-09 | 515 | 493 |
| LOC257358 | 0.266488 | 8.03E-10 | 7.96E-09 | 515 | 474 |
| HCG27     | 0.266512 | 8.00E-10 | 7.94E-09 | 515 | 515 |
| CLEC4M    | 0.266797 | 7.66E-10 | 7.61E-09 | 515 | 335 |
| TNIP1     | 0.266911 | 7.53E-10 | 7.49E-09 | 515 | 515 |
| PRCD      | 0.26696  | 7.48E-10 | 7.44E-09 | 515 | 515 |
| CYGB      | 0.266968 | 7.47E-10 | 7.43E-09 | 515 | 515 |
| ASPA      | 0.267005 | 7.43E-10 | 7.39E-09 | 515 | 492 |
| RNGTT     | 0.26713  | 7.29E-10 | 7.26E-09 | 515 | 515 |
| S1PR2     | 0.267173 | 7.24E-10 | 7.22E-09 | 515 | 515 |
| CALD1     | 0.267327 | 7.07E-10 | 7.06E-09 | 515 | 515 |
| SMPDL3A   | 0.267346 | 7.05E-10 | 7.04E-09 | 515 | 515 |
| MOSPD2    | 0.267638 | 6.75E-10 | 6.74E-09 | 515 | 515 |
| KCNT2     | 0.267725 | 6.66E-10 | 6.66E-09 | 515 | 512 |
| ATP11C    | 0.268233 | 6.17E-10 | 6.17E-09 | 515 | 515 |
| FAT4      | 0.268252 | 6.15E-10 | 6.16E-09 | 515 | 515 |
| TEK       | 0.268333 | 6.07E-10 | 6.09E-09 | 515 | 515 |
| ATM       | 0.268405 | 6.01E-10 | 6.02E-09 | 515 | 515 |
| ID2       | 0.268636 | 5.80E-10 | 5.82E-09 | 515 | 515 |
| SMURF2    | 0.268642 | 5.80E-10 | 5.82E-09 | 515 | 515 |
| GXYLT2    | 0.268735 | 5.71E-10 | 5.74E-09 | 515 | 515 |
| ECM2      | 0.268885 | 5.59E-10 | 5.61E-09 | 515 | 515 |
| OLFML2B   | 0.26902  | 5.47E-10 | 5.50E-09 | 515 | 515 |
| ACRBP     | 0.269126 | 5.38E-10 | 5.42E-09 | 515 | 515 |
| MYCT1     | 0.269133 | 5.38E-10 | 5.41E-09 | 515 | 515 |
| SETX      | 0.269217 | 5.31E-10 | 5.35E-09 | 515 | 515 |
| LOC440461 | 0.26934  | 5.21E-10 | 5.25E-09 | 515 | 500 |
| DTX1      | 0.269356 | 5.20E-10 | 5.24E-09 | 515 | 515 |
| KERA      | 0.269519 | 5.07E-10 | 5.11E-09 | 515 | 458 |
| SYNE1     | 0.269729 | 4.91E-10 | 4.95E-09 | 515 | 515 |
| ACAP2     | 0.269741 | 4.90E-10 | 4.95E-09 | 515 | 515 |
| FOXF2     | 0.26995  | 4.75E-10 | 4.80E-09 | 515 | 515 |
| RLN2      | 0.270447 | 4.40E-10 | 4.45E-09 | 515 | 506 |
| TIPARP    | 0.2705   | 4.36E-10 | 4.42E-09 | 515 | 515 |
| ZNF154    | 0.270622 | 4.28E-10 | 4.34E-09 | 515 | 515 |
| PPAPDC3   | 0.270697 | 4.23E-10 | 4.29E-09 | 515 | 514 |
| RYR2      | 0.271079 | 3.99E-10 | 4.05E-09 | 515 | 515 |
| HLA-DRB6  | 0.271145 | 3.95E-10 | 4.01E-09 | 515 | 511 |
| GPM6A     | 0.271173 | 3.94E-10 | 4.00E-09 | 515 | 500 |
| RAB7L1    | 0.271208 | 3.91E-10 | 3.98E-09 | 515 | 515 |
| CD93      | 0.271352 | 3.83E-10 | 3.90E-09 | 515 | 515 |
| DDHD1     | 0.271367 | 3.82E-10 | 3.89E-09 | 515 | 515 |
| IL6       | 0.271451 | 3.77E-10 | 3.84E-09 | 515 | 515 |
| P2RY1     | 0.271535 | 3.72E-10 | 3.79E-09 | 515 | 514 |
| GLT1D1    | 0.271628 | 3.67E-10 | 3.74E-09 | 515 | 513 |
| DLG2      | 0.272015 | 3.46E-10 | 3.53E-09 | 515 | 515 |
| HERPUD1   | 0.27207  | 3.43E-10 | 3.50E-09 | 515 | 515 |
| SULF1     | 0.272182 | 3.37E-10 | 3.44E-09 | 515 | 515 |



|           |          |          |          |     |     |
|-----------|----------|----------|----------|-----|-----|
| FAM18A    | 0.272204 | 3.36E-10 | 3.43E-09 | 515 | 515 |
| CDH11     | 0.272252 | 3.33E-10 | 3.41E-09 | 515 | 515 |
| REM1      | 0.27257  | 3.17E-10 | 3.25E-09 | 515 | 515 |
| HIATL1    | 0.272592 | 3.16E-10 | 3.24E-09 | 515 | 515 |
| VGLL3     | 0.272665 | 3.13E-10 | 3.21E-09 | 515 | 515 |
| GPR120    | 0.272699 | 3.11E-10 | 3.19E-09 | 515 | 503 |
| LOR       | 0.272746 | 3.09E-10 | 3.17E-09 | 515 | 199 |
| FAM92B    | 0.272806 | 3.06E-10 | 3.14E-09 | 515 | 501 |
| ITPRIP    | 0.272893 | 3.02E-10 | 3.10E-09 | 515 | 515 |
| KIR2DL3   | 0.272914 | 3.01E-10 | 3.09E-09 | 515 | 373 |
| C1orf96   | 0.273022 | 2.96E-10 | 3.04E-09 | 515 | 515 |
| ARHGAP20  | 0.273074 | 2.94E-10 | 3.02E-09 | 515 | 515 |
| ARNTL2    | 0.273471 | 2.76E-10 | 2.84E-09 | 515 | 515 |
| ZCCHC5    | 0.273795 | 2.63E-10 | 2.71E-09 | 515 | 396 |
| APOC1P1   | 0.273807 | 2.62E-10 | 2.70E-09 | 515 | 281 |
| UAP1L1    | 0.273985 | 2.55E-10 | 2.63E-09 | 515 | 515 |
| SCLT1     | 0.27403  | 2.53E-10 | 2.61E-09 | 515 | 515 |
| CHN1      | 0.274043 | 2.53E-10 | 2.61E-09 | 515 | 515 |
| PHF19     | 0.274294 | 2.43E-10 | 2.51E-09 | 515 | 515 |
| AGPAT4    | 0.274303 | 2.43E-10 | 2.51E-09 | 515 | 515 |
| ZNF788    | 0.274326 | 2.42E-10 | 2.50E-09 | 515 | 515 |
| C11orf45  | 0.274409 | 2.39E-10 | 2.47E-09 | 515 | 515 |
| ARSG      | 0.274475 | 2.36E-10 | 2.45E-09 | 515 | 515 |
| TRIM61    | 0.274565 | 2.33E-10 | 2.42E-09 | 515 | 499 |
| PKNOX2    | 0.274589 | 2.32E-10 | 2.41E-09 | 515 | 515 |
| OAF       | 0.274626 | 2.31E-10 | 2.40E-09 | 515 | 515 |
| RGS16     | 0.274753 | 2.26E-10 | 2.35E-09 | 515 | 515 |
| CEACAM3   | 0.275243 | 2.09E-10 | 2.18E-09 | 515 | 505 |
| FAM179A   | 0.275283 | 2.08E-10 | 2.17E-09 | 515 | 513 |
| RAMP3     | 0.275501 | 2.01E-10 | 2.10E-09 | 515 | 515 |
| NFE2L3    | 0.275627 | 1.97E-10 | 2.06E-09 | 515 | 515 |
| TEX11     | 0.275687 | 1.95E-10 | 2.04E-09 | 515 | 403 |
| MAP3K3    | 0.275751 | 1.93E-10 | 2.02E-09 | 515 | 515 |
| ANKRD13A  | 0.275753 | 1.93E-10 | 2.02E-09 | 515 | 515 |
| POSTN     | 0.275797 | 1.92E-10 | 2.01E-09 | 515 | 515 |
| CTRL      | 0.275818 | 1.91E-10 | 2.00E-09 | 515 | 514 |
| PPYR1     | 0.275881 | 1.90E-10 | 1.99E-09 | 515 | 500 |
| KLF10     | 0.275963 | 1.87E-10 | 1.96E-09 | 515 | 515 |
| ADAMTS2   | 0.275981 | 1.87E-10 | 1.96E-09 | 515 | 515 |
| S100A3    | 0.276187 | 1.81E-10 | 1.90E-09 | 515 | 515 |
| SLC16A2   | 0.276231 | 1.79E-10 | 1.89E-09 | 515 | 515 |
| LOC653786 | 0.276446 | 1.74E-10 | 1.82E-09 | 515 | 502 |
| BST2      | 0.276479 | 1.73E-10 | 1.81E-09 | 515 | 515 |
| RNF19A    | 0.276481 | 1.73E-10 | 1.81E-09 | 515 | 515 |
| RANBP6    | 0.2765   | 1.72E-10 | 1.81E-09 | 515 | 515 |
| ACSL4     | 0.276503 | 1.72E-10 | 1.81E-09 | 515 | 515 |
| MEF2B     | 0.276516 | 1.72E-10 | 1.81E-09 | 515 | 512 |
| MAPKAPK3  | 0.276568 | 1.70E-10 | 1.79E-09 | 515 | 515 |
| CD01      | 0.276571 | 1.70E-10 | 1.79E-09 | 515 | 514 |
| TNFAIP8L3 | 0.276779 | 1.65E-10 | 1.74E-09 | 515 | 515 |
| C1orf150  | 0.276803 | 1.64E-10 | 1.73E-09 | 515 | 478 |
| L1TD1     | 0.277217 | 1.54E-10 | 1.62E-09 | 515 | 507 |
| CD82      | 0.277295 | 1.52E-10 | 1.61E-09 | 515 | 515 |
| MMP3      | 0.277316 | 1.51E-10 | 1.60E-09 | 515 | 484 |

|           |          |          |          |     |     |
|-----------|----------|----------|----------|-----|-----|
| ZNF25     | 0.277321 | 1.51E-10 | 1.60E-09 | 515 | 515 |
| ECSCR     | 0.27738  | 1.50E-10 | 1.59E-09 | 515 | 515 |
| ZNF430    | 0.27743  | 1.49E-10 | 1.58E-09 | 515 | 515 |
| IL1A      | 0.277568 | 1.45E-10 | 1.54E-09 | 515 | 507 |
| PTX3      | 0.277649 | 1.44E-10 | 1.52E-09 | 515 | 515 |
| NRP2      | 0.277704 | 1.42E-10 | 1.51E-09 | 515 | 515 |
| GNG7      | 0.277717 | 1.42E-10 | 1.51E-09 | 515 | 515 |
| OTOF      | 0.277811 | 1.40E-10 | 1.49E-09 | 515 | 497 |
| LOC728392 | 0.278094 | 1.34E-10 | 1.42E-09 | 515 | 515 |
| SLC6A7    | 0.278236 | 1.31E-10 | 1.39E-09 | 515 | 458 |
| CCL24     | 0.278248 | 1.31E-10 | 1.39E-09 | 515 | 417 |
| CASP7     | 0.278315 | 1.29E-10 | 1.38E-09 | 515 | 515 |
| RNF13     | 0.278324 | 1.29E-10 | 1.38E-09 | 515 | 515 |
| IL1R1     | 0.278354 | 1.28E-10 | 1.37E-09 | 515 | 515 |
| ELTD1     | 0.278427 | 1.27E-10 | 1.36E-09 | 515 | 515 |
| ARMCX1    | 0.278433 | 1.27E-10 | 1.36E-09 | 515 | 515 |
| FBX039    | 0.278483 | 1.26E-10 | 1.35E-09 | 515 | 477 |
| SLC39A12  | 0.278573 | 1.24E-10 | 1.33E-09 | 515 | 292 |
| CBLN3     | 0.278589 | 1.24E-10 | 1.33E-09 | 515 | 515 |
| FBX06     | 0.278593 | 1.24E-10 | 1.33E-09 | 515 | 515 |
| ST6GALNAC | 0.279105 | 1.14E-10 | 1.22E-09 | 515 | 515 |
| PLA2G2A   | 0.279115 | 1.14E-10 | 1.22E-09 | 515 | 509 |
| FCAR      | 0.279219 | 1.12E-10 | 1.20E-09 | 515 | 479 |
| LDB2      | 0.279225 | 1.12E-10 | 1.20E-09 | 515 | 515 |
| CAPZB     | 0.279461 | 1.08E-10 | 1.16E-09 | 515 | 515 |
| CILP      | 0.279824 | 1.02E-10 | 1.10E-09 | 515 | 515 |
| CBX7      | 0.279901 | 1.00E-10 | 1.08E-09 | 515 | 515 |
| FHL1      | 0.279908 | 1.00E-10 | 1.08E-09 | 515 | 515 |
| BICC1     | 0.279946 | 9.98E-11 | 1.08E-09 | 515 | 515 |
| MT2A      | 0.280196 | 9.59E-11 | 1.04E-09 | 515 | 515 |
| MTMR14    | 0.28027  | 9.47E-11 | 1.02E-09 | 515 | 515 |
| RALB      | 0.28028  | 9.46E-11 | 1.02E-09 | 515 | 515 |
| GCNT4     | 0.280416 | 9.26E-11 | 1.00E-09 | 515 | 512 |
| KLHL4     | 0.280423 | 9.25E-11 | 1.00E-09 | 515 | 514 |
| NDST2     | 0.280434 | 9.23E-11 | 1.00E-09 | 515 | 515 |
| C10orf10  | 0.28055  | 9.06E-11 | 9.83E-10 | 515 | 515 |
| RHOJ      | 0.280566 | 9.04E-11 | 9.81E-10 | 515 | 515 |
| TNC       | 0.28064  | 8.93E-11 | 9.70E-10 | 515 | 515 |
| DMXL2     | 0.280652 | 8.91E-11 | 9.68E-10 | 515 | 515 |
| SLIT2     | 0.280965 | 8.48E-11 | 9.22E-10 | 515 | 515 |
| CTSG      | 0.281104 | 8.29E-11 | 9.02E-10 | 515 | 492 |
| SELE      | 0.28111  | 8.28E-11 | 9.01E-10 | 515 | 514 |
| RILPL2    | 0.281452 | 7.84E-11 | 8.54E-10 | 515 | 515 |
| ATOX1     | 0.281597 | 7.66E-11 | 8.36E-10 | 515 | 515 |
| DYSF      | 0.281713 | 7.52E-11 | 8.21E-10 | 515 | 515 |
| RAI2      | 0.282036 | 7.14E-11 | 7.80E-10 | 515 | 515 |
| SLC28A3   | 0.282111 | 7.06E-11 | 7.71E-10 | 515 | 501 |
| OAS3      | 0.282182 | 6.98E-11 | 7.62E-10 | 515 | 515 |
| PPM1N     | 0.282202 | 6.95E-11 | 7.60E-10 | 515 | 515 |
| KIAA1462  | 0.282254 | 6.90E-11 | 7.54E-10 | 515 | 515 |
| MMP7      | 0.282497 | 6.63E-11 | 7.26E-10 | 515 | 515 |
| CREBL2    | 0.282544 | 6.58E-11 | 7.21E-10 | 515 | 515 |
| VNN1      | 0.282546 | 6.58E-11 | 7.21E-10 | 515 | 515 |
| ZNF699    | 0.282585 | 6.54E-11 | 7.17E-10 | 515 | 514 |

|           |          |          |          |     |     |
|-----------|----------|----------|----------|-----|-----|
| FAM131B   | 0.282749 | 6.37E-11 | 6.99E-10 | 515 | 515 |
| SH2D4B    | 0.282821 | 6.30E-11 | 6.91E-10 | 515 | 487 |
| CXorf38   | 0.282861 | 6.25E-11 | 6.87E-10 | 515 | 515 |
| SLC2A14   | 0.283004 | 6.11E-11 | 6.72E-10 | 515 | 514 |
| LRCH2     | 0.283298 | 5.83E-11 | 6.41E-10 | 515 | 515 |
| PKD3      | 0.283439 | 5.70E-11 | 6.27E-10 | 515 | 515 |
| FLJ45079  | 0.283458 | 5.68E-11 | 6.25E-10 | 515 | 232 |
| C14orf118 | 0.283755 | 5.41E-11 | 5.96E-10 | 515 | 515 |
| COL8A2    | 0.283824 | 5.35E-11 | 5.90E-10 | 515 | 515 |
| IGF1      | 0.284079 | 5.14E-11 | 5.66E-10 | 515 | 515 |
| PALLD     | 0.284153 | 5.08E-11 | 5.60E-10 | 515 | 515 |
| DCP2      | 0.284265 | 4.99E-11 | 5.50E-10 | 515 | 515 |
| CLEC4G    | 0.284319 | 4.94E-11 | 5.46E-10 | 515 | 476 |
| CEBPE     | 0.284357 | 4.91E-11 | 5.43E-10 | 515 | 484 |
| ITPR2     | 0.284437 | 4.85E-11 | 5.36E-10 | 515 | 515 |
| CCR9      | 0.284515 | 4.79E-11 | 5.30E-10 | 515 | 439 |
| SNRK      | 0.284558 | 4.75E-11 | 5.26E-10 | 515 | 515 |
| TMSL3     | 0.284654 | 4.68E-11 | 5.19E-10 | 515 | 515 |
| ZNF175    | 0.284663 | 4.67E-11 | 5.18E-10 | 515 | 515 |
| CYP2U1    | 0.284842 | 4.54E-11 | 5.04E-10 | 515 | 515 |
| PRKD3     | 0.284867 | 4.52E-11 | 5.02E-10 | 515 | 515 |
| FXYD5     | 0.284907 | 4.49E-11 | 4.99E-10 | 515 | 515 |
| MKNK1     | 0.28511  | 4.35E-11 | 4.84E-10 | 515 | 515 |
| ATG4A     | 0.285297 | 4.22E-11 | 4.70E-10 | 515 | 515 |
| SEPP1     | 0.28561  | 4.01E-11 | 4.46E-10 | 515 | 515 |
| ZNF382    | 0.285667 | 3.97E-11 | 4.43E-10 | 515 | 515 |
| LPPR4     | 0.285731 | 3.93E-11 | 4.38E-10 | 515 | 515 |
| MORC3     | 0.285981 | 3.77E-11 | 4.21E-10 | 515 | 515 |
| ACE       | 0.28603  | 3.74E-11 | 4.18E-10 | 515 | 515 |
| TPST2     | 0.286039 | 3.74E-11 | 4.18E-10 | 515 | 515 |
| C7        | 0.286106 | 3.70E-11 | 4.14E-10 | 515 | 515 |
| LOC115110 | 0.286156 | 3.67E-11 | 4.11E-10 | 515 | 515 |
| TDRD6     | 0.286397 | 3.52E-11 | 3.96E-10 | 515 | 514 |
| CXCL14    | 0.286593 | 3.41E-11 | 3.83E-10 | 515 | 515 |
| PTPRJ     | 0.286654 | 3.38E-11 | 3.80E-10 | 515 | 515 |
| DGKA      | 0.28677  | 3.32E-11 | 3.73E-10 | 515 | 515 |
| ZNF136    | 0.286882 | 3.26E-11 | 3.66E-10 | 515 | 515 |
| TSHR      | 0.286919 | 3.24E-11 | 3.64E-10 | 515 | 491 |
| LOC84856  | 0.287047 | 3.17E-11 | 3.57E-10 | 515 | 515 |
| KCNJ2     | 0.28715  | 3.12E-11 | 3.51E-10 | 515 | 515 |
| POLK      | 0.287194 | 3.09E-11 | 3.49E-10 | 515 | 515 |
| IL23A     | 0.287286 | 3.05E-11 | 3.44E-10 | 515 | 515 |
| ITIH3     | 0.287292 | 3.04E-11 | 3.44E-10 | 515 | 513 |
| TCF21     | 0.287418 | 2.98E-11 | 3.37E-10 | 515 | 514 |
| DOK1      | 0.287514 | 2.94E-11 | 3.32E-10 | 515 | 515 |
| KIAA1045  | 0.287521 | 2.93E-11 | 3.32E-10 | 515 | 506 |
| SNX3      | 0.287794 | 2.80E-11 | 3.18E-10 | 515 | 515 |
| SNX11     | 0.288161 | 2.64E-11 | 3.00E-10 | 515 | 515 |
| FHAD1     | 0.288263 | 2.60E-11 | 2.95E-10 | 515 | 515 |
| MAST3     | 0.288359 | 2.55E-11 | 2.91E-10 | 515 | 515 |
| KIAA0247  | 0.288551 | 2.47E-11 | 2.82E-10 | 515 | 515 |
| SAA4      | 0.288557 | 2.47E-11 | 2.82E-10 | 515 | 439 |
| DDR2      | 0.288869 | 2.35E-11 | 2.68E-10 | 515 | 515 |
| SIGLEC16  | 0.288914 | 2.33E-11 | 2.66E-10 | 515 | 507 |

|          |          |          |          |     |     |
|----------|----------|----------|----------|-----|-----|
| RARRES2  | 0.288927 | 2.33E-11 | 2.66E-10 | 515 | 515 |
| RBM43    | 0.289061 | 2.28E-11 | 2.60E-10 | 515 | 515 |
| ALDH1A3  | 0.289119 | 2.25E-11 | 2.58E-10 | 515 | 515 |
| SIGLEC15 | 0.289234 | 2.21E-11 | 2.53E-10 | 515 | 489 |
| ZCCHC24  | 0.289332 | 2.18E-11 | 2.49E-10 | 515 | 515 |
| ESR1     | 0.28956  | 2.10E-11 | 2.40E-10 | 515 | 515 |
| DOK5     | 0.289717 | 2.04E-11 | 2.34E-10 | 515 | 515 |
| C6orf150 | 0.289783 | 2.02E-11 | 2.32E-10 | 515 | 515 |
| CDC14A   | 0.289893 | 1.98E-11 | 2.27E-10 | 515 | 515 |
| ELM01    | 0.289939 | 1.97E-11 | 2.26E-10 | 515 | 515 |
| RAP1B    | 0.289954 | 1.96E-11 | 2.25E-10 | 515 | 515 |
| CARD17   | 0.289969 | 1.96E-11 | 2.25E-10 | 515 | 272 |
| ARHGAP17 | 0.290155 | 1.90E-11 | 2.18E-10 | 515 | 515 |
| RFX5     | 0.290181 | 1.89E-11 | 2.18E-10 | 515 | 515 |
| TNFRSF18 | 0.290404 | 1.82E-11 | 2.10E-10 | 515 | 515 |
| TMEM110  | 0.290487 | 1.80E-11 | 2.07E-10 | 515 | 515 |
| TTC16    | 0.290644 | 1.75E-11 | 2.02E-10 | 515 | 505 |
| GBGT1    | 0.29073  | 1.73E-11 | 1.99E-10 | 515 | 515 |
| NBL1     | 0.290761 | 1.72E-11 | 1.98E-10 | 515 | 515 |
| NEURL3   | 0.290766 | 1.72E-11 | 1.98E-10 | 515 | 512 |
| CLC      | 0.290814 | 1.70E-11 | 1.97E-10 | 515 | 318 |
| ADAM12   | 0.290837 | 1.70E-11 | 1.96E-10 | 515 | 515 |
| FAM20A   | 0.290929 | 1.67E-11 | 1.93E-10 | 515 | 515 |
| ATF5     | 0.291129 | 1.61E-11 | 1.87E-10 | 515 | 515 |
| C1QTNF1  | 0.291144 | 1.61E-11 | 1.87E-10 | 515 | 515 |
| APOC4    | 0.291205 | 1.59E-11 | 1.85E-10 | 515 | 373 |
| RAB8A    | 0.291322 | 1.56E-11 | 1.82E-10 | 515 | 515 |
| TRPM2    | 0.291573 | 1.50E-11 | 1.74E-10 | 515 | 515 |
| SARDH    | 0.292036 | 1.39E-11 | 1.61E-10 | 515 | 515 |
| COL6A1   | 0.292042 | 1.39E-11 | 1.61E-10 | 515 | 515 |
| C22orf26 | 0.292101 | 1.37E-11 | 1.60E-10 | 515 | 514 |
| RHBDF2   | 0.292357 | 1.32E-11 | 1.54E-10 | 515 | 515 |
| MSN      | 0.292369 | 1.31E-11 | 1.53E-10 | 515 | 515 |
| MARCKS   | 0.292635 | 1.26E-11 | 1.47E-10 | 515 | 515 |
| DIRC1    | 0.29269  | 1.24E-11 | 1.46E-10 | 515 | 263 |
| SLC38A5  | 0.292785 | 1.22E-11 | 1.43E-10 | 515 | 515 |
| MFAP4    | 0.293071 | 1.17E-11 | 1.37E-10 | 515 | 515 |
| IQSEC1   | 0.293119 | 1.16E-11 | 1.36E-10 | 515 | 515 |
| M6PR     | 0.29365  | 1.06E-11 | 1.24E-10 | 515 | 515 |
| SGK3     | 0.293703 | 1.05E-11 | 1.23E-10 | 515 | 515 |
| TUBB6    | 0.293732 | 1.04E-11 | 1.23E-10 | 515 | 515 |
| DFNA5    | 0.29392  | 1.01E-11 | 1.19E-10 | 515 | 515 |
| GLS      | 0.294121 | 9.78E-12 | 1.15E-10 | 515 | 515 |
| CD1A     | 0.294219 | 9.62E-12 | 1.13E-10 | 515 | 509 |
| C12orf69 | 0.294377 | 9.37E-12 | 1.10E-10 | 515 | 514 |
| C19orf59 | 0.294408 | 9.32E-12 | 1.10E-10 | 515 | 512 |
| RRAD     | 0.294408 | 9.32E-12 | 1.10E-10 | 515 | 515 |
| PCNX     | 0.29468  | 8.90E-12 | 1.05E-10 | 515 | 515 |
| TAPBP    | 0.294772 | 8.77E-12 | 1.04E-10 | 515 | 515 |
| HTR6     | 0.294845 | 8.66E-12 | 1.02E-10 | 515 | 309 |
| ZNF215   | 0.295234 | 8.11E-12 | 9.59E-11 | 515 | 514 |
| TAPBPL   | 0.295257 | 8.08E-12 | 9.56E-11 | 515 | 515 |
| UTS2     | 0.295431 | 7.84E-12 | 9.29E-11 | 515 | 418 |
| FAM38B   | 0.295569 | 7.66E-12 | 9.08E-11 | 515 | 515 |

|           |          |          |          |     |     |
|-----------|----------|----------|----------|-----|-----|
| C10orf105 | 0.295582 | 7.64E-12 | 9.07E-11 | 515 | 503 |
| PION      | 0.295622 | 7.59E-12 | 9.01E-11 | 515 | 515 |
| SLC22A4   | 0.295724 | 7.46E-12 | 8.86E-11 | 515 | 515 |
| BIRC7     | 0.295834 | 7.32E-12 | 8.70E-11 | 515 | 512 |
| EREG      | 0.295884 | 7.26E-12 | 8.64E-11 | 515 | 512 |
| LIMS1     | 0.295885 | 7.26E-12 | 8.64E-11 | 515 | 515 |
| CPXM1     | 0.295889 | 7.26E-12 | 8.64E-11 | 515 | 515 |
| MBNL1     | 0.295977 | 7.15E-12 | 8.52E-11 | 515 | 515 |
| PLAU      | 0.296073 | 7.03E-12 | 8.39E-11 | 515 | 515 |
| GPA33     | 0.296098 | 7.00E-12 | 8.36E-11 | 515 | 508 |
| IL27RA    | 0.296224 | 6.86E-12 | 8.19E-11 | 515 | 515 |
| FRMD6     | 0.296274 | 6.80E-12 | 8.12E-11 | 515 | 515 |
| OXNAD1    | 0.296354 | 6.71E-12 | 8.02E-11 | 515 | 515 |
| HCFC2     | 0.296762 | 6.26E-12 | 7.49E-11 | 515 | 515 |
| SLC25A46  | 0.296997 | 6.01E-12 | 7.20E-11 | 515 | 515 |
| INSL3     | 0.297072 | 5.93E-12 | 7.11E-11 | 515 | 506 |
| PHOSPHO1  | 0.297229 | 5.78E-12 | 6.93E-11 | 515 | 511 |
| NR5A2     | 0.297265 | 5.74E-12 | 6.89E-11 | 515 | 515 |
| WNT2      | 0.297307 | 5.70E-12 | 6.85E-11 | 515 | 515 |
| IGFBP7    | 0.297404 | 5.61E-12 | 6.74E-11 | 515 | 515 |
| C6orf174  | 0.297469 | 5.55E-12 | 6.67E-11 | 515 | 514 |
| COL6A2    | 0.297639 | 5.39E-12 | 6.49E-11 | 515 | 515 |
| XPNPEP2   | 0.29768  | 5.35E-12 | 6.45E-11 | 515 | 511 |
| MMP19     | 0.29776  | 5.28E-12 | 6.36E-11 | 515 | 515 |
| ADPGK     | 0.297875 | 5.18E-12 | 6.25E-11 | 515 | 515 |
| GOS2      | 0.297967 | 5.09E-12 | 6.15E-11 | 515 | 515 |
| PBX4      | 0.297992 | 5.07E-12 | 6.13E-11 | 515 | 515 |
| ERAP2     | 0.298005 | 5.06E-12 | 6.12E-11 | 515 | 515 |
| PLA2G15   | 0.298182 | 4.91E-12 | 5.94E-11 | 515 | 515 |
| PRR16     | 0.298259 | 4.85E-12 | 5.87E-11 | 515 | 515 |
| FILIP1L   | 0.298275 | 4.83E-12 | 5.86E-11 | 515 | 515 |
| RSP01     | 0.29846  | 4.68E-12 | 5.68E-11 | 515 | 488 |
| MR1       | 0.298613 | 4.56E-12 | 5.54E-11 | 515 | 515 |
| SPRED1    | 0.298697 | 4.50E-12 | 5.46E-11 | 515 | 515 |
| EFHD2     | 0.298733 | 4.47E-12 | 5.43E-11 | 515 | 515 |
| KCTD17    | 0.29903  | 4.25E-12 | 5.17E-11 | 515 | 515 |
| MDFIC     | 0.299166 | 4.15E-12 | 5.05E-11 | 515 | 515 |
| BATF      | 0.299312 | 4.05E-12 | 4.93E-11 | 515 | 515 |
| BACH2     | 0.299608 | 3.84E-12 | 4.69E-11 | 515 | 515 |
| RAP2B     | 0.299624 | 3.83E-12 | 4.68E-11 | 515 | 515 |
| CALCRL    | 0.299717 | 3.77E-12 | 4.61E-11 | 515 | 515 |
| MYBPC3    | 0.300025 | 3.58E-12 | 4.37E-11 | 515 | 440 |
| TRIM34    | 0.300075 | 3.55E-12 | 4.34E-11 | 515 | 515 |
| CCL14     | 0.300083 | 3.54E-12 | 4.34E-11 | 515 | 514 |
| SERPINB8  | 0.300152 | 3.50E-12 | 4.29E-11 | 515 | 515 |
| F2R       | 0.300214 | 3.46E-12 | 4.25E-11 | 515 | 515 |
| SCN2B     | 0.300226 | 3.46E-12 | 4.24E-11 | 515 | 503 |
| SPNS3     | 0.300244 | 3.45E-12 | 4.23E-11 | 515 | 509 |
| CX3CR1    | 0.30026  | 3.44E-12 | 4.22E-11 | 515 | 515 |
| KIR3DL2   | 0.300271 | 3.43E-12 | 4.22E-11 | 515 | 390 |
| HBEGF     | 0.300276 | 3.43E-12 | 4.22E-11 | 515 | 515 |
| FEZ1      | 0.300343 | 3.39E-12 | 4.17E-11 | 515 | 515 |
| CX3CL1    | 0.300381 | 3.37E-12 | 4.14E-11 | 515 | 515 |
| RAB42     | 0.300403 | 3.35E-12 | 4.13E-11 | 515 | 515 |

|           |          |          |          |     |     |
|-----------|----------|----------|----------|-----|-----|
| ADAM8     | 0.300413 | 3.35E-12 | 4.13E-11 | 515 | 515 |
| PADI2     | 0.300724 | 3.17E-12 | 3.91E-11 | 515 | 515 |
| GLRX      | 0.300805 | 3.13E-12 | 3.86E-11 | 515 | 515 |
| PGBD5     | 0.300969 | 3.04E-12 | 3.76E-11 | 515 | 515 |
| MYH7      | 0.300975 | 3.04E-12 | 3.75E-11 | 515 | 249 |
| RALGDS    | 0.301051 | 3.00E-12 | 3.71E-11 | 515 | 515 |
| GSTO1     | 0.30113  | 2.96E-12 | 3.66E-11 | 515 | 515 |
| FFAR3     | 0.30151  | 2.77E-12 | 3.43E-11 | 515 | 471 |
| WDFY1     | 0.301679 | 2.69E-12 | 3.33E-11 | 515 | 515 |
| TMEM188   | 0.301772 | 2.65E-12 | 3.28E-11 | 515 | 515 |
| TXNIP     | 0.301883 | 2.59E-12 | 3.22E-11 | 515 | 515 |
| MPO       | 0.302288 | 2.42E-12 | 3.00E-11 | 515 | 508 |
| SLC4A7    | 0.302324 | 2.40E-12 | 2.99E-11 | 515 | 515 |
| SDC3      | 0.302664 | 2.27E-12 | 2.82E-11 | 515 | 515 |
| BOC       | 0.303053 | 2.12E-12 | 2.63E-11 | 515 | 515 |
| CCDC50    | 0.303138 | 2.09E-12 | 2.60E-11 | 515 | 515 |
| JPH4      | 0.303291 | 2.03E-12 | 2.53E-11 | 515 | 513 |
| BEND6     | 0.303345 | 2.01E-12 | 2.51E-11 | 515 | 515 |
| TRAF5     | 0.303359 | 2.01E-12 | 2.51E-11 | 515 | 515 |
| ARHGAP4   | 0.303469 | 1.97E-12 | 2.46E-11 | 515 | 515 |
| IRAK3     | 0.303731 | 1.88E-12 | 2.35E-11 | 515 | 515 |
| TAOK3     | 0.304089 | 1.77E-12 | 2.21E-11 | 515 | 515 |
| TTYH2     | 0.304117 | 1.76E-12 | 2.20E-11 | 515 | 515 |
| TLR3      | 0.3042   | 1.73E-12 | 2.17E-11 | 515 | 515 |
| FAM7A3    | 0.304256 | 1.72E-12 | 2.15E-11 | 515 | 508 |
| CFH       | 0.304391 | 1.68E-12 | 2.10E-11 | 515 | 515 |
| ARSI      | 0.304438 | 1.66E-12 | 2.09E-11 | 515 | 515 |
| FAM111A   | 0.304486 | 1.65E-12 | 2.07E-11 | 515 | 515 |
| ACSL6     | 0.304596 | 1.62E-12 | 2.03E-11 | 515 | 506 |
| ZBTB1     | 0.304842 | 1.55E-12 | 1.95E-11 | 515 | 515 |
| TNNI2     | 0.304921 | 1.53E-12 | 1.92E-11 | 515 | 509 |
| CALHM1    | 0.305113 | 1.48E-12 | 1.86E-11 | 515 | 408 |
| C3orf38   | 0.305383 | 1.41E-12 | 1.78E-11 | 515 | 515 |
| SPARCL1   | 0.305458 | 1.39E-12 | 1.75E-11 | 515 | 515 |
| PDGFRA    | 0.306053 | 1.25E-12 | 1.58E-11 | 515 | 515 |
| SNCA      | 0.306088 | 1.24E-12 | 1.57E-11 | 515 | 515 |
| PSMA8     | 0.306266 | 1.20E-12 | 1.52E-11 | 515 | 325 |
| OR4C6     | 0.306274 | 1.20E-12 | 1.52E-11 | 515 | 286 |
| LOC728989 | 0.30632  | 1.19E-12 | 1.51E-11 | 515 | 484 |
| C5orf41   | 0.306509 | 1.15E-12 | 1.46E-11 | 515 | 515 |
| LGALS1    | 0.306542 | 1.15E-12 | 1.45E-11 | 515 | 515 |
| ROBO3     | 0.306549 | 1.15E-12 | 1.45E-11 | 515 | 515 |
| A2M       | 0.30659  | 1.14E-12 | 1.44E-11 | 515 | 515 |
| SLCO5A1   | 0.306685 | 1.12E-12 | 1.42E-11 | 515 | 511 |
| IL24      | 0.306884 | 1.08E-12 | 1.37E-11 | 515 | 497 |
| FREM1     | 0.307066 | 1.05E-12 | 1.33E-11 | 515 | 514 |
| FRZB      | 0.307192 | 1.02E-12 | 1.30E-11 | 515 | 515 |
| DOCK4     | 0.307227 | 1.02E-12 | 1.29E-11 | 515 | 515 |
| KCNE1     | 0.307262 | 1.01E-12 | 1.29E-11 | 515 | 513 |
| RNF130    | 0.307539 | 9.62E-13 | 1.23E-11 | 515 | 515 |
| CAMK1     | 0.307565 | 9.57E-13 | 1.22E-11 | 515 | 515 |
| PPARG     | 0.307692 | 9.36E-13 | 1.20E-11 | 515 | 515 |
| HMOX1     | 0.307704 | 9.34E-13 | 1.19E-11 | 515 | 515 |
| DNASE2    | 0.307825 | 9.14E-13 | 1.17E-11 | 515 | 515 |

|           |          |          |          |     |     |
|-----------|----------|----------|----------|-----|-----|
| FLJ36031  | 0.307991 | 8.88E-13 | 1.14E-11 | 515 | 515 |
| CR2       | 0.308106 | 8.70E-13 | 1.11E-11 | 515 | 513 |
| L1CAM     | 0.30811  | 8.69E-13 | 1.11E-11 | 515 | 513 |
| IQSEC3    | 0.308182 | 8.58E-13 | 1.10E-11 | 515 | 511 |
| CD300E    | 0.308307 | 8.39E-13 | 1.08E-11 | 515 | 463 |
| ITGAV     | 0.308669 | 7.87E-13 | 1.01E-11 | 515 | 515 |
| EXOG      | 0.308759 | 7.74E-13 | 9.96E-12 | 515 | 515 |
| KLHL14    | 0.309056 | 7.34E-13 | 9.46E-12 | 515 | 503 |
| MAPK11    | 0.309282 | 7.05E-13 | 9.09E-12 | 515 | 515 |
| SKAP2     | 0.309398 | 6.91E-13 | 8.91E-12 | 515 | 515 |
| SETDB2    | 0.309804 | 6.42E-13 | 8.30E-12 | 515 | 515 |
| ARRDC4    | 0.309877 | 6.34E-13 | 8.19E-12 | 515 | 515 |
| RECQL     | 0.309911 | 6.30E-13 | 8.15E-12 | 515 | 515 |
| NEXN      | 0.309966 | 6.24E-13 | 8.08E-12 | 515 | 515 |
| SAA1      | 0.31053  | 5.64E-13 | 7.31E-12 | 515 | 513 |
| MOBKL2B   | 0.310583 | 5.59E-13 | 7.24E-12 | 515 | 515 |
| NKAPL     | 0.310781 | 5.39E-13 | 6.99E-12 | 515 | 507 |
| SSTR2     | 0.310811 | 5.36E-13 | 6.96E-12 | 515 | 515 |
| RGL1      | 0.310985 | 5.20E-13 | 6.75E-12 | 515 | 515 |
| ZNFX1     | 0.310998 | 5.19E-13 | 6.74E-12 | 515 | 515 |
| IL33      | 0.311155 | 5.04E-13 | 6.56E-12 | 515 | 515 |
| HECA      | 0.311586 | 4.67E-13 | 6.07E-12 | 515 | 515 |
| DKK2      | 0.311627 | 4.63E-13 | 6.03E-12 | 515 | 515 |
| C21orf96  | 0.311841 | 4.46E-13 | 5.81E-12 | 515 | 355 |
| BNIP2     | 0.311887 | 4.42E-13 | 5.77E-12 | 515 | 515 |
| RAB31     | 0.311984 | 4.34E-13 | 5.67E-12 | 515 | 515 |
| PDZRN3    | 0.312021 | 4.31E-13 | 5.64E-12 | 515 | 515 |
| FGF7      | 0.312155 | 4.21E-13 | 5.50E-12 | 515 | 515 |
| GPR85     | 0.312198 | 4.18E-13 | 5.47E-12 | 515 | 514 |
| ATP10A    | 0.31226  | 4.13E-13 | 5.41E-12 | 515 | 515 |
| FOXN2     | 0.312335 | 4.08E-13 | 5.34E-12 | 515 | 515 |
| C2orf65   | 0.312345 | 4.07E-13 | 5.33E-12 | 515 | 511 |
| SCARF1    | 0.31238  | 4.04E-13 | 5.30E-12 | 515 | 515 |
| RIPK2     | 0.312542 | 3.93E-13 | 5.15E-12 | 515 | 515 |
| ATG3      | 0.312604 | 3.88E-13 | 5.10E-12 | 515 | 515 |
| MRGPRF    | 0.312622 | 3.87E-13 | 5.09E-12 | 515 | 515 |
| NCK1      | 0.312955 | 3.64E-13 | 4.79E-12 | 515 | 515 |
| CARD11    | 0.312997 | 3.62E-13 | 4.76E-12 | 515 | 515 |
| OTUD1     | 0.313036 | 3.59E-13 | 4.73E-12 | 515 | 515 |
| GYG1      | 0.313055 | 3.58E-13 | 4.71E-12 | 515 | 515 |
| RASA2     | 0.313149 | 3.52E-13 | 4.64E-12 | 515 | 515 |
| C3orf59   | 0.313154 | 3.51E-13 | 4.64E-12 | 515 | 515 |
| BCL2L14   | 0.313428 | 3.34E-13 | 4.41E-12 | 515 | 515 |
| KIF17     | 0.313472 | 3.32E-13 | 4.38E-12 | 515 | 515 |
| FAM46C    | 0.313895 | 3.07E-13 | 4.06E-12 | 515 | 515 |
| LOC440896 | 0.313973 | 3.03E-13 | 4.01E-12 | 515 | 366 |
| ZNF781    | 0.314015 | 3.01E-13 | 3.98E-12 | 515 | 515 |
| RASL12    | 0.314212 | 2.90E-13 | 3.84E-12 | 515 | 515 |
| ALPK1     | 0.314219 | 2.90E-13 | 3.84E-12 | 515 | 515 |
| RAP2C     | 0.314381 | 2.81E-13 | 3.73E-12 | 515 | 515 |
| MOBKL2C   | 0.314424 | 2.79E-13 | 3.71E-12 | 515 | 515 |
| HS3ST3A1  | 0.314439 | 2.78E-13 | 3.70E-12 | 515 | 513 |
| C21orf91  | 0.314594 | 2.71E-13 | 3.60E-12 | 515 | 515 |
| ICOSLG    | 0.314819 | 2.60E-13 | 3.46E-12 | 515 | 515 |

|           |          |          |          |     |     |
|-----------|----------|----------|----------|-----|-----|
| SH3BGRL3  | 0.314876 | 2.57E-13 | 3.42E-12 | 515 | 515 |
| OSBPL11   | 0.315048 | 2.49E-13 | 3.32E-12 | 515 | 515 |
| LRRC4C    | 0.315253 | 2.40E-13 | 3.20E-12 | 515 | 512 |
| RECK      | 0.315887 | 2.14E-13 | 2.85E-12 | 515 | 515 |
| PM20D1    | 0.315959 | 2.11E-13 | 2.82E-12 | 515 | 436 |
| ADA       | 0.316517 | 1.90E-13 | 2.54E-12 | 515 | 515 |
| CPPED1    | 0.316533 | 1.90E-13 | 2.54E-12 | 515 | 515 |
| C22orf34  | 0.316584 | 1.88E-13 | 2.52E-12 | 515 | 470 |
| ANXA1     | 0.316786 | 1.81E-13 | 2.43E-12 | 515 | 515 |
| DCK       | 0.316793 | 1.81E-13 | 2.43E-12 | 515 | 515 |
| VAMP1     | 0.316851 | 1.79E-13 | 2.40E-12 | 515 | 515 |
| FGFR10P2  | 0.317111 | 1.71E-13 | 2.29E-12 | 515 | 515 |
| GYPE      | 0.317229 | 1.67E-13 | 2.24E-12 | 515 | 504 |
| IDS       | 0.317335 | 1.64E-13 | 2.20E-12 | 515 | 515 |
| SAMD4A    | 0.317383 | 1.62E-13 | 2.18E-12 | 515 | 515 |
| C9orf46   | 0.317536 | 1.58E-13 | 2.13E-12 | 515 | 515 |
| C6orf105  | 0.317573 | 1.57E-13 | 2.11E-12 | 515 | 513 |
| FAM102B   | 0.317575 | 1.57E-13 | 2.11E-12 | 515 | 515 |
| ZYX       | 0.317687 | 1.54E-13 | 2.07E-12 | 515 | 515 |
| PTPN1     | 0.31774  | 1.52E-13 | 2.05E-12 | 515 | 515 |
| CC2D2B    | 0.317925 | 1.47E-13 | 1.99E-12 | 515 | 503 |
| ICAM1     | 0.317968 | 1.46E-13 | 1.97E-12 | 515 | 515 |
| GSTM5     | 0.318045 | 1.44E-13 | 1.94E-12 | 515 | 514 |
| MX1       | 0.318337 | 1.36E-13 | 1.85E-12 | 515 | 515 |
| NIN       | 0.318399 | 1.35E-13 | 1.83E-12 | 515 | 515 |
| MMP2      | 0.318453 | 1.33E-13 | 1.81E-12 | 515 | 515 |
| PALM2-AKA | 0.318832 | 1.24E-13 | 1.69E-12 | 515 | 515 |
| GNAO1     | 0.31888  | 1.23E-13 | 1.68E-12 | 515 | 515 |
| NLRP6     | 0.318887 | 1.23E-13 | 1.67E-12 | 515 | 496 |
| GDF5      | 0.318909 | 1.22E-13 | 1.67E-12 | 515 | 505 |
| EIF4E3    | 0.318981 | 1.21E-13 | 1.65E-12 | 515 | 515 |
| EHD4      | 0.319507 | 1.10E-13 | 1.50E-12 | 515 | 515 |
| ENPP2     | 0.31968  | 1.06E-13 | 1.45E-12 | 515 | 515 |
| SLC2A3    | 0.319728 | 1.05E-13 | 1.44E-12 | 515 | 515 |
| MYO9B     | 0.319872 | 1.02E-13 | 1.40E-12 | 515 | 515 |
| LIPG      | 0.320027 | 9.95E-14 | 1.36E-12 | 515 | 515 |
| IL1RN     | 0.320352 | 9.37E-14 | 1.29E-12 | 515 | 515 |
| ASPHD2    | 0.320352 | 9.37E-14 | 1.29E-12 | 515 | 515 |
| SHD       | 0.320626 | 8.90E-14 | 1.22E-12 | 515 | 380 |
| GLI1      | 0.320746 | 8.71E-14 | 1.20E-12 | 515 | 514 |
| ATP1A3    | 0.320749 | 8.70E-14 | 1.20E-12 | 515 | 512 |
| HHEX      | 0.320954 | 8.37E-14 | 1.15E-12 | 515 | 515 |
| CSK       | 0.321316 | 7.83E-14 | 1.08E-12 | 515 | 515 |
| HDAC9     | 0.321483 | 7.59E-14 | 1.05E-12 | 515 | 515 |
| SH3KBP1   | 0.321598 | 7.43E-14 | 1.03E-12 | 515 | 515 |
| PLCL1     | 0.321742 | 7.23E-14 | 9.99E-13 | 515 | 515 |
| MAL       | 0.321792 | 7.16E-14 | 9.91E-13 | 515 | 515 |
| EMILIN1   | 0.321928 | 6.98E-14 | 9.66E-13 | 515 | 515 |
| ESYT1     | 0.322151 | 6.70E-14 | 9.27E-13 | 515 | 515 |
| CHRDL1    | 0.322235 | 6.59E-14 | 9.14E-13 | 515 | 514 |
| VENTX     | 0.322263 | 6.56E-14 | 9.10E-13 | 515 | 515 |
| MOBKL2A   | 0.322368 | 6.43E-14 | 8.92E-13 | 515 | 515 |
| CEP120    | 0.32253  | 6.24E-14 | 8.66E-13 | 515 | 515 |
| SAA2      | 0.322617 | 6.14E-14 | 8.53E-13 | 515 | 508 |



|          |          |          |          |     |     |
|----------|----------|----------|----------|-----|-----|
| TIFA     | 0.322922 | 5.79E-14 | 8.06E-13 | 515 | 515 |
| TNS3     | 0.323161 | 5.54E-14 | 7.71E-13 | 515 | 515 |
| TMEM71   | 0.323231 | 5.47E-14 | 7.61E-13 | 515 | 515 |
| PYCARD   | 0.32357  | 5.13E-14 | 7.15E-13 | 515 | 515 |
| LTF      | 0.323677 | 5.03E-14 | 7.01E-13 | 515 | 514 |
| LIME1    | 0.323775 | 4.93E-14 | 6.89E-13 | 515 | 515 |
| COLEC12  | 0.32488  | 4.00E-14 | 5.60E-13 | 515 | 515 |
| IFIT1    | 0.324886 | 4.00E-14 | 5.60E-13 | 515 | 515 |
| KIAA0922 | 0.325244 | 3.74E-14 | 5.24E-13 | 515 | 515 |
| CHI3L2   | 0.325295 | 3.70E-14 | 5.19E-13 | 515 | 515 |
| CYP7B1   | 0.325604 | 3.49E-14 | 4.90E-13 | 515 | 515 |
| HDX      | 0.325664 | 3.45E-14 | 4.85E-13 | 515 | 515 |
| ZFP36L2  | 0.325922 | 3.29E-14 | 4.62E-13 | 515 | 515 |
| LAMA2    | 0.32605  | 3.21E-14 | 4.51E-13 | 515 | 515 |
| IGFL2    | 0.326519 | 2.93E-14 | 4.13E-13 | 515 | 501 |
| UTS2D    | 0.326566 | 2.91E-14 | 4.10E-13 | 515 | 446 |
| XIRP1    | 0.326592 | 2.89E-14 | 4.08E-13 | 515 | 509 |
| KLF6     | 0.326685 | 2.84E-14 | 4.01E-13 | 515 | 515 |
| HGF      | 0.326941 | 2.71E-14 | 3.82E-13 | 515 | 515 |
| GBP3     | 0.327384 | 2.49E-14 | 3.52E-13 | 515 | 515 |
| CCDC152  | 0.327472 | 2.45E-14 | 3.46E-13 | 515 | 514 |
| SYNPO2   | 0.327492 | 2.44E-14 | 3.45E-13 | 515 | 515 |
| C10orf55 | 0.327554 | 2.41E-14 | 3.41E-13 | 515 | 510 |
| GRK6     | 0.327798 | 2.30E-14 | 3.26E-13 | 515 | 515 |
| UNC45B   | 0.327808 | 2.29E-14 | 3.25E-13 | 515 | 491 |
| TBC1D2B  | 0.327963 | 2.23E-14 | 3.16E-13 | 515 | 515 |
| ZBTB46   | 0.328722 | 1.92E-14 | 2.74E-13 | 515 | 515 |
| COL6A3   | 0.328885 | 1.87E-14 | 2.66E-13 | 515 | 515 |
| PPP1R2P1 | 0.328922 | 1.85E-14 | 2.64E-13 | 515 | 500 |
| NBN      | 0.329014 | 1.82E-14 | 2.60E-13 | 515 | 515 |
| LITAF    | 0.329242 | 1.74E-14 | 2.49E-13 | 515 | 515 |
| CNTLN    | 0.329298 | 1.72E-14 | 2.46E-13 | 515 | 515 |
| LAIR2    | 0.32968  | 1.60E-14 | 2.29E-13 | 515 | 473 |
| TDRD7    | 0.329866 | 1.54E-14 | 2.21E-13 | 515 | 515 |
| CMTM3    | 0.329998 | 1.51E-14 | 2.16E-13 | 515 | 515 |
| AURKC    | 0.330019 | 1.50E-14 | 2.15E-13 | 515 | 513 |
| YPEL4    | 0.330359 | 1.40E-14 | 2.01E-13 | 515 | 515 |
| PAPD4    | 0.330403 | 1.39E-14 | 2.00E-13 | 515 | 515 |
| ART4     | 0.330643 | 1.33E-14 | 1.91E-13 | 515 | 493 |
| PRRX1    | 0.330865 | 1.27E-14 | 1.83E-13 | 515 | 515 |
| C13orf31 | 0.330931 | 1.26E-14 | 1.81E-13 | 515 | 515 |
| LYST     | 0.331    | 1.24E-14 | 1.79E-13 | 515 | 515 |
| CD160    | 0.3312   | 1.19E-14 | 1.72E-13 | 515 | 514 |
| ZNF385A  | 0.331239 | 1.18E-14 | 1.71E-13 | 515 | 515 |
| TRAFD1   | 0.331597 | 1.11E-14 | 1.59E-13 | 515 | 515 |
| IL5RA    | 0.33169  | 1.09E-14 | 1.57E-13 | 515 | 485 |
| PLB1     | 0.33174  | 1.07E-14 | 1.55E-13 | 515 | 515 |
| MAN1C1   | 0.331793 | 1.06E-14 | 1.54E-13 | 515 | 515 |
| FAM26E   | 0.332422 | 9.42E-15 | 1.36E-13 | 515 | 515 |
| RHEBL1   | 0.332651 | 9.01E-15 | 1.31E-13 | 515 | 515 |
| 3-Mar    | 0.333013 | 8.39E-15 | 1.22E-13 | 515 | 515 |
| C5orf62  | 0.333058 | 8.32E-15 | 1.21E-13 | 515 | 515 |
| TGFB3    | 0.333361 | 7.84E-15 | 1.14E-13 | 515 | 515 |
| IL13     | 0.333364 | 7.84E-15 | 1.14E-13 | 515 | 329 |

|           |          |          |          |     |     |
|-----------|----------|----------|----------|-----|-----|
| LCNL1     | 0.333569 | 7.53E-15 | 1.10E-13 | 515 | 428 |
| KLF17     | 0.333808 | 7.18E-15 | 1.05E-13 | 515 | 471 |
| TMEM176B  | 0.333979 | 6.95E-15 | 1.01E-13 | 515 | 515 |
| SECTM1    | 0.333985 | 6.94E-15 | 1.01E-13 | 515 | 515 |
| TGFBI     | 0.334132 | 6.74E-15 | 9.84E-14 | 515 | 515 |
| CPZ       | 0.334205 | 6.65E-15 | 9.71E-14 | 515 | 515 |
| HSPA7     | 0.334377 | 6.43E-15 | 9.40E-14 | 515 | 515 |
| RAP1A     | 0.334383 | 6.42E-15 | 9.39E-14 | 515 | 515 |
| BNC2      | 0.334572 | 6.19E-15 | 9.06E-14 | 515 | 515 |
| C12orf4   | 0.334941 | 5.75E-15 | 8.43E-14 | 515 | 515 |
| PTPLAD2   | 0.335058 | 5.62E-15 | 8.25E-14 | 515 | 515 |
| TCF4      | 0.335286 | 5.38E-15 | 7.90E-14 | 515 | 515 |
| CRB2      | 0.335622 | 5.03E-15 | 7.40E-14 | 515 | 482 |
| FRMD4A    | 0.33587  | 4.79E-15 | 7.05E-14 | 515 | 515 |
| TNFSF18   | 0.336101 | 4.58E-15 | 6.74E-14 | 515 | 449 |
| CDH23     | 0.336165 | 4.52E-15 | 6.66E-14 | 515 | 515 |
| SV2B      | 0.336226 | 4.47E-15 | 6.59E-14 | 515 | 514 |
| SLFN5     | 0.336397 | 4.32E-15 | 6.38E-14 | 515 | 515 |
| IFI27     | 0.336679 | 4.08E-15 | 6.03E-14 | 515 | 515 |
| LNPEP     | 0.33671  | 4.06E-15 | 6.00E-14 | 515 | 515 |
| LOC100272 | 0.336885 | 3.92E-15 | 5.80E-14 | 515 | 509 |
| IPCEF1    | 0.337216 | 3.67E-15 | 5.44E-14 | 515 | 515 |
| DARC      | 0.337268 | 3.64E-15 | 5.39E-14 | 515 | 513 |
| LOC374443 | 0.338142 | 3.06E-15 | 4.53E-14 | 515 | 515 |
| ARSB      | 0.33852  | 2.84E-15 | 4.21E-14 | 515 | 515 |
| CCRL1     | 0.338837 | 2.66E-15 | 3.95E-14 | 515 | 515 |
| NFATC1    | 0.338948 | 2.60E-15 | 3.87E-14 | 515 | 515 |
| MAN2B1    | 0.33904  | 2.56E-15 | 3.81E-14 | 515 | 515 |
| TSPAN2    | 0.339518 | 2.32E-15 | 3.46E-14 | 515 | 515 |
| LSAMP     | 0.339553 | 2.31E-15 | 3.44E-14 | 515 | 515 |
| IRAK4     | 0.339719 | 2.23E-15 | 3.33E-14 | 515 | 515 |
| MRAS      | 0.340055 | 2.09E-15 | 3.12E-14 | 515 | 515 |
| TNFSF12   | 0.340233 | 2.01E-15 | 3.01E-14 | 515 | 515 |
| TSHZ3     | 0.340238 | 2.01E-15 | 3.01E-14 | 515 | 515 |
| TMEM51    | 0.340357 | 1.96E-15 | 2.94E-14 | 515 | 515 |
| NIPAL4    | 0.340472 | 1.92E-15 | 2.88E-14 | 515 | 508 |
| CCL1      | 0.340654 | 1.85E-15 | 2.78E-14 | 515 | 296 |
| FLJ37543  | 0.340813 | 1.79E-15 | 2.69E-14 | 515 | 328 |
| PIK3IP1   | 0.340914 | 1.76E-15 | 2.64E-14 | 515 | 515 |
| RORA      | 0.341176 | 1.67E-15 | 2.51E-14 | 515 | 515 |
| FAR2      | 0.341284 | 1.63E-15 | 2.46E-14 | 515 | 515 |
| ASGR2     | 0.341512 | 1.56E-15 | 2.35E-14 | 515 | 513 |
| IFIT5     | 0.341532 | 1.55E-15 | 2.34E-14 | 515 | 515 |
| APOL1     | 0.341539 | 1.55E-15 | 2.34E-14 | 515 | 515 |
| HAS2      | 0.341822 | 1.46E-15 | 2.21E-14 | 515 | 515 |
| MCTP1     | 0.341984 | 1.42E-15 | 2.14E-14 | 515 | 515 |
| LILRA3    | 0.342591 | 1.25E-15 | 1.90E-14 | 515 | 492 |
| FCHSD2    | 0.342637 | 1.24E-15 | 1.88E-14 | 515 | 515 |
| STX1B     | 0.342882 | 1.18E-15 | 1.79E-14 | 515 | 515 |
| TMEM55A   | 0.342941 | 1.17E-15 | 1.77E-14 | 515 | 515 |
| COL19A1   | 0.343019 | 1.15E-15 | 1.74E-14 | 515 | 436 |
| DENND2D   | 0.343377 | 1.07E-15 | 1.62E-14 | 515 | 515 |
| TCN2      | 0.343866 | 9.68E-16 | 1.47E-14 | 515 | 515 |
| EPHB6     | 0.344081 | 9.27E-16 | 1.41E-14 | 515 | 515 |

|          |          |          |          |     |     |
|----------|----------|----------|----------|-----|-----|
| LYN      | 0.344188 | 9.07E-16 | 1.38E-14 | 515 | 515 |
| TNFSF14  | 0.344225 | 9.00E-16 | 1.37E-14 | 515 | 512 |
| C6orf97  | 0.34499  | 7.71E-16 | 1.18E-14 | 515 | 515 |
| TRAF3    | 0.345172 | 7.43E-16 | 1.13E-14 | 515 | 515 |
| NAV3     | 0.345233 | 7.33E-16 | 1.12E-14 | 515 | 515 |
| PHF11    | 0.345329 | 7.19E-16 | 1.10E-14 | 515 | 515 |
| WTAP     | 0.345352 | 7.16E-16 | 1.10E-14 | 515 | 515 |
| TPSB2    | 0.345439 | 7.03E-16 | 1.08E-14 | 515 | 515 |
| STAT2    | 0.345795 | 6.54E-16 | 1.00E-14 | 515 | 515 |
| TNFAIP6  | 0.345882 | 6.42E-16 | 9.86E-15 | 515 | 515 |
| RNF213   | 0.346024 | 6.24E-16 | 9.58E-15 | 515 | 515 |
| MYO7A    | 0.346073 | 6.18E-16 | 9.49E-15 | 515 | 515 |
| TRIM38   | 0.346139 | 6.10E-16 | 9.37E-15 | 515 | 515 |
| CYB5R4   | 0.346154 | 6.08E-16 | 9.35E-15 | 515 | 515 |
| KIF21B   | 0.346167 | 6.06E-16 | 9.33E-15 | 515 | 515 |
| CCDC80   | 0.346239 | 5.97E-16 | 9.20E-15 | 515 | 515 |
| NAT8B    | 0.346286 | 5.92E-16 | 9.12E-15 | 515 | 459 |
| CXorf57  | 0.346898 | 5.22E-16 | 8.05E-15 | 515 | 514 |
| ANGPTL1  | 0.346903 | 5.21E-16 | 8.05E-15 | 515 | 514 |
| MOBKL1B  | 0.346948 | 5.16E-16 | 7.98E-15 | 515 | 515 |
| RAB37    | 0.347199 | 4.91E-16 | 7.59E-15 | 515 | 515 |
| AFAP1L2  | 0.347281 | 4.82E-16 | 7.47E-15 | 515 | 515 |
| ZDHC14   | 0.347318 | 4.79E-16 | 7.42E-15 | 515 | 515 |
| ZNF671   | 0.347391 | 4.72E-16 | 7.31E-15 | 515 | 515 |
| CASP8    | 0.347895 | 4.25E-16 | 6.60E-15 | 515 | 515 |
| SELP     | 0.347946 | 4.21E-16 | 6.53E-15 | 515 | 515 |
| RENBP    | 0.348054 | 4.11E-16 | 6.39E-15 | 515 | 515 |
| CH25H    | 0.348205 | 3.99E-16 | 6.20E-15 | 515 | 515 |
| ASAM     | 0.348409 | 3.82E-16 | 5.96E-15 | 515 | 515 |
| C19orf66 | 0.348708 | 3.60E-16 | 5.61E-15 | 515 | 515 |
| NFKBID   | 0.348909 | 3.45E-16 | 5.38E-15 | 515 | 515 |
| ISLR     | 0.349062 | 3.34E-16 | 5.22E-15 | 515 | 515 |
| ZNF366   | 0.349094 | 3.32E-16 | 5.19E-15 | 515 | 514 |
| SLC36A1  | 0.349253 | 3.21E-16 | 5.02E-15 | 515 | 515 |
| C21orf7  | 0.349356 | 3.14E-16 | 4.92E-15 | 515 | 515 |
| ADRB2    | 0.349569 | 3.01E-16 | 4.71E-15 | 515 | 515 |
| DPPA4    | 0.349768 | 2.89E-16 | 4.53E-15 | 515 | 366 |
| MSX2P1   | 0.350409 | 2.53E-16 | 3.97E-15 | 515 | 431 |
| HLA-J    | 0.35125  | 2.12E-16 | 3.33E-15 | 515 | 514 |
| FM03     | 0.35161  | 1.97E-16 | 3.09E-15 | 515 | 515 |
| ST3GAL2  | 0.351689 | 1.94E-16 | 3.05E-15 | 515 | 515 |
| HAMP     | 0.351785 | 1.90E-16 | 2.99E-15 | 515 | 505 |
| EPS15    | 0.352107 | 1.77E-16 | 2.80E-15 | 515 | 515 |
| FAP      | 0.352214 | 1.74E-16 | 2.74E-15 | 515 | 515 |
| S1PR1    | 0.35232  | 1.70E-16 | 2.68E-15 | 515 | 515 |
| ICAM2    | 0.3524   | 1.67E-16 | 2.64E-15 | 515 | 515 |
| CASP4    | 0.352507 | 1.63E-16 | 2.58E-15 | 515 | 515 |
| IKBKE    | 0.352514 | 1.63E-16 | 2.58E-15 | 515 | 515 |
| PDPN     | 0.352593 | 1.60E-16 | 2.54E-15 | 515 | 515 |
| HERC6    | 0.35266  | 1.58E-16 | 2.50E-15 | 515 | 515 |
| NFKB1    | 0.352745 | 1.55E-16 | 2.46E-15 | 515 | 515 |
| NMT2     | 0.352927 | 1.49E-16 | 2.37E-15 | 515 | 515 |
| ARRB2    | 0.353723 | 1.26E-16 | 2.01E-15 | 515 | 515 |
| HRH2     | 0.354268 | 1.13E-16 | 1.79E-15 | 515 | 515 |

|           |          |          |          |     |     |
|-----------|----------|----------|----------|-----|-----|
| DPT       | 0.354268 | 1.13E-16 | 1.79E-15 | 515 | 515 |
| LUM       | 0.354274 | 1.13E-16 | 1.79E-15 | 515 | 515 |
| PIM1      | 0.354334 | 1.11E-16 | 1.77E-15 | 515 | 515 |
| IFNGR1    | 0.354908 | 9.86E-17 | 1.57E-15 | 515 | 515 |
| ALPK2     | 0.355019 | 9.63E-17 | 1.54E-15 | 515 | 511 |
| PPM1K     | 0.355023 | 9.62E-17 | 1.54E-15 | 515 | 515 |
| HSH2D     | 0.355062 | 9.54E-17 | 1.53E-15 | 515 | 515 |
| KCNA6     | 0.355409 | 8.87E-17 | 1.42E-15 | 515 | 497 |
| CNOT6L    | 0.355432 | 8.82E-17 | 1.41E-15 | 515 | 515 |
| PARP11    | 0.355544 | 8.62E-17 | 1.38E-15 | 515 | 515 |
| PRR5L     | 0.355667 | 8.40E-17 | 1.35E-15 | 515 | 515 |
| LRRN3     | 0.355714 | 8.31E-17 | 1.33E-15 | 515 | 514 |
| BCL2      | 0.355807 | 8.15E-17 | 1.31E-15 | 515 | 515 |
| PDLIM3    | 0.35612  | 7.63E-17 | 1.23E-15 | 515 | 515 |
| CD97      | 0.356235 | 7.44E-17 | 1.20E-15 | 515 | 515 |
| LAYN      | 0.356769 | 6.65E-17 | 1.07E-15 | 515 | 515 |
| PML       | 0.356785 | 6.62E-17 | 1.07E-15 | 515 | 515 |
| HMHA1     | 0.357224 | 6.03E-17 | 9.73E-16 | 515 | 515 |
| ARAP2     | 0.358136 | 4.97E-17 | 8.03E-16 | 515 | 515 |
| C2orf89   | 0.358286 | 4.81E-17 | 7.78E-16 | 515 | 515 |
| MICAL1    | 0.3587   | 4.40E-17 | 7.13E-16 | 515 | 515 |
| MGAT1     | 0.358869 | 4.25E-17 | 6.88E-16 | 515 | 515 |
| SLC18A1   | 0.358969 | 4.16E-17 | 6.74E-16 | 515 | 362 |
| DTX3L     | 0.359129 | 4.02E-17 | 6.52E-16 | 515 | 515 |
| IL23R     | 0.359451 | 3.75E-17 | 6.09E-16 | 515 | 408 |
| KCNH4     | 0.359877 | 3.42E-17 | 5.56E-16 | 515 | 480 |
| PLA2G5    | 0.359903 | 3.40E-17 | 5.53E-16 | 515 | 514 |
| DERL3     | 0.35992  | 3.39E-17 | 5.52E-16 | 515 | 515 |
| IL17A     | 0.359931 | 3.38E-17 | 5.51E-16 | 515 | 237 |
| C10orf125 | 0.360235 | 3.17E-17 | 5.16E-16 | 515 | 515 |
| KIAA1274  | 0.360722 | 2.85E-17 | 4.65E-16 | 515 | 515 |
| GBP7      | 0.361014 | 2.68E-17 | 4.38E-16 | 515 | 294 |
| STAC      | 0.361311 | 2.51E-17 | 4.11E-16 | 515 | 515 |
| PSAP      | 0.361391 | 2.47E-17 | 4.04E-16 | 515 | 515 |
| OTOA      | 0.361837 | 2.24E-17 | 3.67E-16 | 515 | 514 |
| MANEA     | 0.361898 | 2.21E-17 | 3.63E-16 | 515 | 515 |
| ENPP6     | 0.36247  | 1.96E-17 | 3.21E-16 | 515 | 503 |
| KIAA1432  | 0.362654 | 1.88E-17 | 3.09E-16 | 515 | 515 |
| SNX2      | 0.36266  | 1.88E-17 | 3.08E-16 | 515 | 515 |
| EPB41L3   | 0.362695 | 1.86E-17 | 3.06E-16 | 515 | 515 |
| AKAP2     | 0.362743 | 1.84E-17 | 3.03E-16 | 515 | 515 |
| CRHBP     | 0.362787 | 1.83E-17 | 3.01E-16 | 515 | 470 |
| MDGA1     | 0.362991 | 1.75E-17 | 2.88E-16 | 515 | 515 |
| CD300LB   | 0.363005 | 1.74E-17 | 2.87E-16 | 515 | 515 |
| BATF3     | 0.363027 | 1.73E-17 | 2.86E-16 | 515 | 515 |
| SMTNL1    | 0.363251 | 1.65E-17 | 2.73E-16 | 515 | 500 |
| ADAMTSL4  | 0.36329  | 1.64E-17 | 2.71E-16 | 515 | 515 |
| AKAP7     | 0.363312 | 1.63E-17 | 2.70E-16 | 515 | 515 |
| TBXAS1    | 0.363458 | 1.58E-17 | 2.62E-16 | 515 | 515 |
| PNRC1     | 0.363545 | 1.55E-17 | 2.57E-16 | 515 | 515 |
| C20orf118 | 0.36364  | 1.52E-17 | 2.52E-16 | 515 | 515 |
| TMEM106A  | 0.363663 | 1.51E-17 | 2.51E-16 | 515 | 515 |
| DHRS9     | 0.363936 | 1.42E-17 | 2.36E-16 | 515 | 515 |
| ATP6VOD2  | 0.364022 | 1.40E-17 | 2.32E-16 | 515 | 515 |

|          |          |          |          |     |     |
|----------|----------|----------|----------|-----|-----|
| PPP3CC   | 0.364506 | 1.26E-17 | 2.09E-16 | 515 | 515 |
| TPSAB1   | 0.364597 | 1.23E-17 | 2.05E-16 | 515 | 514 |
| DDX60L   | 0.364913 | 1.15E-17 | 1.92E-16 | 515 | 515 |
| TLR9     | 0.36513  | 1.10E-17 | 1.83E-16 | 515 | 515 |
| CASQ1    | 0.365263 | 1.06E-17 | 1.78E-16 | 515 | 484 |
| CSF2     | 0.365444 | 1.02E-17 | 1.71E-16 | 515 | 502 |
| PARP8    | 0.365534 | 1.00E-17 | 1.68E-16 | 515 | 515 |
| CBFA2T3  | 0.365765 | 9.53E-18 | 1.60E-16 | 515 | 515 |
| CCDC102B | 0.365823 | 9.41E-18 | 1.58E-16 | 515 | 515 |
| RASA3    | 0.365876 | 9.31E-18 | 1.56E-16 | 515 | 515 |
| MS4A2    | 0.366378 | 8.33E-18 | 1.40E-16 | 515 | 513 |
| USP15    | 0.366674 | 7.81E-18 | 1.31E-16 | 515 | 515 |
| MLKL     | 0.367325 | 6.77E-18 | 1.14E-16 | 515 | 515 |
| MAP1LC3C | 0.367328 | 6.76E-18 | 1.14E-16 | 515 | 511 |
| RIN3     | 0.367472 | 6.55E-18 | 1.10E-16 | 515 | 515 |
| GRB2     | 0.367906 | 5.95E-18 | 1.00E-16 | 515 | 515 |
| PAG1     | 0.367996 | 5.83E-18 | 9.85E-17 | 515 | 515 |
| CECR6    | 0.368034 | 5.79E-18 | 9.77E-17 | 515 | 514 |
| NCEH1    | 0.368234 | 5.54E-18 | 9.36E-17 | 515 | 515 |
| CTS0     | 0.368373 | 5.37E-18 | 9.08E-17 | 515 | 515 |
| HPGDS    | 0.368494 | 5.23E-18 | 8.85E-17 | 515 | 515 |
| PECAM1   | 0.368625 | 5.08E-18 | 8.61E-17 | 515 | 515 |
| CCDC88B  | 0.368994 | 4.68E-18 | 7.94E-17 | 515 | 515 |
| CCDC88A  | 0.369095 | 4.57E-18 | 7.77E-17 | 515 | 515 |
| MYLK     | 0.369466 | 4.21E-18 | 7.16E-17 | 515 | 515 |
| CHI3L1   | 0.36967  | 4.03E-18 | 6.85E-17 | 515 | 515 |
| RNF125   | 0.369673 | 4.02E-18 | 6.85E-17 | 515 | 515 |
| CYP27A1  | 0.369768 | 3.94E-18 | 6.71E-17 | 515 | 515 |
| KCNN3    | 0.369826 | 3.89E-18 | 6.63E-17 | 515 | 515 |
| IRF2     | 0.370029 | 3.72E-18 | 6.34E-17 | 515 | 515 |
| C9orf21  | 0.370055 | 3.70E-18 | 6.31E-17 | 515 | 515 |
| CCL3L3   | 0.370482 | 3.36E-18 | 5.75E-17 | 515 | 394 |
| KCTD12   | 0.370534 | 3.32E-18 | 5.68E-17 | 515 | 515 |
| LOXL3    | 0.370685 | 3.21E-18 | 5.50E-17 | 515 | 515 |
| PXK      | 0.370965 | 3.02E-18 | 5.17E-17 | 515 | 515 |
| SFMBT2   | 0.37125  | 2.83E-18 | 4.86E-17 | 515 | 515 |
| KLRC2    | 0.371475 | 2.69E-18 | 4.62E-17 | 515 | 496 |
| FGD5     | 0.371573 | 2.63E-18 | 4.53E-17 | 515 | 515 |
| SLC29A3  | 0.37202  | 2.38E-18 | 4.10E-17 | 515 | 515 |
| C9orf72  | 0.372083 | 2.35E-18 | 4.04E-17 | 515 | 515 |
| NRXN2    | 0.372246 | 2.26E-18 | 3.90E-17 | 515 | 515 |
| ATP10D   | 0.372321 | 2.23E-18 | 3.84E-17 | 515 | 515 |
| ZEB1     | 0.372451 | 2.16E-18 | 3.73E-17 | 515 | 515 |
| SIGLECP3 | 0.372473 | 2.15E-18 | 3.72E-17 | 515 | 506 |
| MAX      | 0.372528 | 2.13E-18 | 3.68E-17 | 515 | 515 |
| C5orf40  | 0.372536 | 2.12E-18 | 3.67E-17 | 515 | 313 |
| PLCB2    | 0.372644 | 2.07E-18 | 3.59E-17 | 515 | 515 |
| COL6A6   | 0.3727   | 2.05E-18 | 3.55E-17 | 515 | 510 |
| IL34     | 0.372874 | 1.97E-18 | 3.41E-17 | 515 | 513 |
| SLFN12   | 0.373086 | 1.88E-18 | 3.26E-17 | 515 | 515 |
| HLA-DQB2 | 0.373911 | 1.56E-18 | 2.71E-17 | 515 | 515 |
| TMOD2    | 0.374532 | 1.35E-18 | 2.35E-17 | 515 | 515 |
| GPBAR1   | 0.374979 | 1.22E-18 | 2.13E-17 | 515 | 515 |
| SEMA7A   | 0.374982 | 1.22E-18 | 2.13E-17 | 515 | 515 |

|           |          |          |          |     |     |
|-----------|----------|----------|----------|-----|-----|
| SH2D3C    | 0.375152 | 1.18E-18 | 2.05E-17 | 515 | 515 |
| OSM       | 0.375261 | 1.15E-18 | 2.00E-17 | 515 | 515 |
| STK17B    | 0.375268 | 1.15E-18 | 2.00E-17 | 515 | 515 |
| FGF2      | 0.375405 | 1.11E-18 | 1.94E-17 | 515 | 515 |
| LOC389634 | 0.375428 | 1.10E-18 | 1.93E-17 | 515 | 506 |
| UBE2E2    | 0.375757 | 1.03E-18 | 1.80E-17 | 515 | 515 |
| IQGAP2    | 0.375926 | 9.87E-19 | 1.73E-17 | 515 | 515 |
| PLSCR1    | 0.376127 | 9.43E-19 | 1.65E-17 | 515 | 515 |
| AQP9      | 0.376229 | 9.21E-19 | 1.62E-17 | 515 | 515 |
| DAZL      | 0.376832 | 8.03E-19 | 1.41E-17 | 515 | 326 |
| CR1L      | 0.376926 | 7.86E-19 | 1.38E-17 | 515 | 439 |
| FAM70A    | 0.376985 | 7.75E-19 | 1.37E-17 | 515 | 515 |
| PRCP      | 0.377057 | 7.63E-19 | 1.34E-17 | 515 | 515 |
| CLEC5A    | 0.377256 | 7.29E-19 | 1.29E-17 | 515 | 515 |
| MAP7D3    | 0.377705 | 6.58E-19 | 1.16E-17 | 515 | 515 |
| ACVRL1    | 0.377706 | 6.58E-19 | 1.16E-17 | 515 | 515 |
| GCA       | 0.377865 | 6.34E-19 | 1.12E-17 | 515 | 515 |
| HLA-G     | 0.377904 | 6.29E-19 | 1.11E-17 | 515 | 515 |
| CCL11     | 0.37794  | 6.24E-19 | 1.10E-17 | 515 | 510 |
| CCL3L1    | 0.377986 | 6.17E-19 | 1.09E-17 | 515 | 505 |
| BEST1     | 0.378376 | 5.64E-19 | 1.00E-17 | 515 | 515 |
| CASP10    | 0.378897 | 5.01E-19 | 8.90E-18 | 515 | 515 |
| PARVB     | 0.379022 | 4.87E-19 | 8.65E-18 | 515 | 515 |
| NTAN1     | 0.379033 | 4.85E-19 | 8.64E-18 | 515 | 515 |
| RAB39     | 0.379133 | 4.74E-19 | 8.45E-18 | 515 | 512 |
| KIR2DL4   | 0.379246 | 4.62E-19 | 8.24E-18 | 515 | 470 |
| FLVCR2    | 0.379259 | 4.61E-19 | 8.22E-18 | 515 | 515 |
| MYD88     | 0.379585 | 4.28E-19 | 7.64E-18 | 515 | 515 |
| SIRPD     | 0.379834 | 4.04E-19 | 7.22E-18 | 515 | 377 |
| MAN1A1    | 0.380037 | 3.85E-19 | 6.89E-18 | 515 | 515 |
| GFRA2     | 0.380521 | 3.45E-19 | 6.17E-18 | 515 | 513 |
| MAT2B     | 0.380974 | 3.10E-19 | 5.56E-18 | 515 | 515 |
| MOXD1     | 0.381624 | 2.67E-19 | 4.79E-18 | 515 | 515 |
| XCRI      | 0.382074 | 2.41E-19 | 4.32E-18 | 515 | 469 |
| TICAM2    | 0.3821   | 2.39E-19 | 4.30E-18 | 515 | 512 |
| S100Z     | 0.382159 | 2.36E-19 | 4.24E-18 | 515 | 468 |
| LRFN5     | 0.382328 | 2.27E-19 | 4.08E-18 | 515 | 507 |
| RAB32     | 0.382737 | 2.06E-19 | 3.72E-18 | 515 | 515 |
| PRNP      | 0.383145 | 1.88E-19 | 3.38E-18 | 515 | 515 |
| ARPC2     | 0.383282 | 1.82E-19 | 3.28E-18 | 515 | 515 |
| LOC401463 | 0.383963 | 1.55E-19 | 2.80E-18 | 515 | 487 |
| ANK2      | 0.384087 | 1.51E-19 | 2.72E-18 | 515 | 515 |
| ZNF438    | 0.384226 | 1.46E-19 | 2.64E-18 | 515 | 515 |
| OR52N4    | 0.384342 | 1.42E-19 | 2.57E-18 | 515 | 410 |
| PTGIR     | 0.384354 | 1.41E-19 | 2.57E-18 | 515 | 515 |
| STARD5    | 0.384435 | 1.39E-19 | 2.52E-18 | 515 | 515 |
| DDX26B    | 0.384657 | 1.32E-19 | 2.39E-18 | 515 | 515 |
| CYP1B1    | 0.384756 | 1.29E-19 | 2.34E-18 | 515 | 515 |
| ANGPTL6   | 0.384847 | 1.26E-19 | 2.29E-18 | 515 | 507 |
| TMEM86A   | 0.38493  | 1.24E-19 | 2.25E-18 | 515 | 515 |
| TGFB1     | 0.384951 | 1.23E-19 | 2.24E-18 | 515 | 515 |
| GBP6      | 0.384992 | 1.22E-19 | 2.22E-18 | 515 | 510 |
| TLR2      | 0.38558  | 1.06E-19 | 1.94E-18 | 515 | 515 |
| DCN       | 0.385682 | 1.04E-19 | 1.89E-18 | 515 | 515 |

|           |          |          |          |     |     |
|-----------|----------|----------|----------|-----|-----|
| CXCL12    | 0.386203 | 9.16E-20 | 1.68E-18 | 515 | 515 |
| BTN1A1    | 0.386257 | 9.05E-20 | 1.66E-18 | 515 | 445 |
| KCNJ5     | 0.386617 | 8.31E-20 | 1.52E-18 | 515 | 515 |
| LEF1      | 0.387    | 7.60E-20 | 1.39E-18 | 515 | 515 |
| SLC16A6   | 0.387323 | 7.04E-20 | 1.29E-18 | 515 | 515 |
| BST1      | 0.387508 | 6.74E-20 | 1.24E-18 | 515 | 515 |
| ARHGAP31  | 0.387797 | 6.29E-20 | 1.16E-18 | 515 | 515 |
| CCDC141   | 0.387996 | 6.00E-20 | 1.11E-18 | 515 | 514 |
| PTK2B     | 0.388599 | 5.20E-20 | 9.59E-19 | 515 | 515 |
| RNASE2    | 0.388629 | 5.16E-20 | 9.53E-19 | 515 | 512 |
| PROX2     | 0.388712 | 5.06E-20 | 9.36E-19 | 515 | 423 |
| DNASE2B   | 0.388807 | 4.95E-20 | 9.16E-19 | 515 | 480 |
| IL12RB2   | 0.388887 | 4.86E-20 | 8.99E-19 | 515 | 512 |
| TIAM1     | 0.389017 | 4.71E-20 | 8.72E-19 | 515 | 515 |
| OGFRL1    | 0.389268 | 4.44E-20 | 8.23E-19 | 515 | 515 |
| C9orf109  | 0.389358 | 4.34E-20 | 8.06E-19 | 515 | 514 |
| TMEM26    | 0.389405 | 4.29E-20 | 7.98E-19 | 515 | 515 |
| CPA3      | 0.389554 | 4.15E-20 | 7.71E-19 | 515 | 514 |
| TNFRSF14  | 0.389813 | 3.90E-20 | 7.25E-19 | 515 | 515 |
| GNA13     | 0.389929 | 3.79E-20 | 7.06E-19 | 515 | 515 |
| CACNA2D4  | 0.39005  | 3.68E-20 | 6.87E-19 | 515 | 515 |
| VASH1     | 0.390179 | 3.57E-20 | 6.67E-19 | 515 | 515 |
| FMO1      | 0.390222 | 3.54E-20 | 6.60E-19 | 515 | 514 |
| UBE2J1    | 0.390398 | 3.39E-20 | 6.34E-19 | 515 | 515 |
| PTGER2    | 0.39044  | 3.36E-20 | 6.28E-19 | 515 | 515 |
| FXYP7     | 0.390447 | 3.35E-20 | 6.28E-19 | 515 | 473 |
| C9orf110  | 0.390554 | 3.27E-20 | 6.12E-19 | 515 | 515 |
| CMPK2     | 0.390558 | 3.26E-20 | 6.12E-19 | 515 | 515 |
| PSME1     | 0.390692 | 3.16E-20 | 5.94E-19 | 515 | 515 |
| RGS19     | 0.390926 | 2.99E-20 | 5.62E-19 | 515 | 515 |
| WISP1     | 0.3913   | 2.73E-20 | 5.14E-19 | 515 | 515 |
| CHST11    | 0.391583 | 2.55E-20 | 4.81E-19 | 515 | 515 |
| C1orf186  | 0.391684 | 2.49E-20 | 4.70E-19 | 515 | 509 |
| DNASE1L3  | 0.392074 | 2.27E-20 | 4.28E-19 | 515 | 502 |
| XRN1      | 0.392123 | 2.24E-20 | 4.24E-19 | 515 | 515 |
| QKI       | 0.392816 | 1.90E-20 | 3.59E-19 | 515 | 515 |
| CDHR1     | 0.392923 | 1.85E-20 | 3.50E-19 | 515 | 505 |
| SERPINA9  | 0.393408 | 1.65E-20 | 3.12E-19 | 515 | 361 |
| KIAA0040  | 0.393491 | 1.61E-20 | 3.06E-19 | 515 | 515 |
| DPYD      | 0.393542 | 1.59E-20 | 3.02E-19 | 515 | 515 |
| MMP12     | 0.39361  | 1.57E-20 | 2.98E-19 | 515 | 515 |
| MCHR1     | 0.393655 | 1.55E-20 | 2.95E-19 | 515 | 509 |
| CRYBB1    | 0.393757 | 1.51E-20 | 2.88E-19 | 515 | 503 |
| DDX58     | 0.39469  | 1.21E-20 | 2.30E-19 | 515 | 515 |
| CSGALNACT | 0.394917 | 1.14E-20 | 2.18E-19 | 515 | 515 |
| XCL1      | 0.39522  | 1.06E-20 | 2.03E-19 | 515 | 510 |
| ABCA1     | 0.395448 | 1.00E-20 | 1.92E-19 | 515 | 515 |
| MITF      | 0.395462 | 1.00E-20 | 1.91E-19 | 515 | 515 |
| MARCO     | 0.39553  | 9.85E-21 | 1.89E-19 | 515 | 514 |
| MEF2C     | 0.395612 | 9.65E-21 | 1.85E-19 | 515 | 515 |
| ARL6IP5   | 0.396438 | 7.89E-21 | 1.51E-19 | 515 | 515 |
| PARP12    | 0.396687 | 7.43E-21 | 1.43E-19 | 515 | 515 |
| CLEC12B   | 0.396706 | 7.40E-21 | 1.42E-19 | 515 | 443 |
| NLRP1     | 0.39673  | 7.35E-21 | 1.41E-19 | 515 | 515 |

|          |          |          |          |     |     |
|----------|----------|----------|----------|-----|-----|
| GFPT2    | 0.396823 | 7.19E-21 | 1.38E-19 | 515 | 515 |
| ERMN     | 0.39684  | 7.16E-21 | 1.38E-19 | 515 | 514 |
| LMO2     | 0.396915 | 7.03E-21 | 1.36E-19 | 515 | 515 |
| CCDC69   | 0.396932 | 7.00E-21 | 1.35E-19 | 515 | 515 |
| PKHD1L1  | 0.397008 | 6.87E-21 | 1.33E-19 | 515 | 507 |
| CORO1C   | 0.397682 | 5.83E-21 | 1.13E-19 | 515 | 515 |
| KCNA2    | 0.397888 | 5.54E-21 | 1.07E-19 | 515 | 428 |
| SH3BP1   | 0.39812  | 5.23E-21 | 1.01E-19 | 515 | 515 |
| ANXA6    | 0.39816  | 5.18E-21 | 1.01E-19 | 515 | 515 |
| CTSZ     | 0.398562 | 4.69E-21 | 9.12E-20 | 515 | 515 |
| PPARGC1B | 0.398938 | 4.28E-21 | 8.32E-20 | 515 | 513 |
| CCL21    | 0.399081 | 4.13E-21 | 8.04E-20 | 515 | 514 |
| FMO2     | 0.399193 | 4.02E-21 | 7.83E-20 | 515 | 515 |
| EA2F2    | 0.40015  | 3.18E-21 | 6.19E-20 | 515 | 515 |
| IFI27L2  | 0.400292 | 3.07E-21 | 5.98E-20 | 515 | 515 |
| IRF9     | 0.40039  | 2.99E-21 | 5.85E-20 | 515 | 515 |
| RELB     | 0.400827 | 2.69E-21 | 5.25E-20 | 515 | 515 |
| CDC42SE2 | 0.401058 | 2.54E-21 | 4.97E-20 | 515 | 515 |
| NFATC2   | 0.401091 | 2.52E-21 | 4.93E-20 | 515 | 514 |
| CAPG     | 0.401126 | 2.49E-21 | 4.89E-20 | 515 | 515 |
| NAGK     | 0.401152 | 2.48E-21 | 4.87E-20 | 515 | 515 |
| GPR15    | 0.401366 | 2.35E-21 | 4.62E-20 | 515 | 481 |
| APOB48R  | 0.401749 | 2.14E-21 | 4.21E-20 | 515 | 515 |
| CCL25    | 0.401786 | 2.12E-21 | 4.17E-20 | 515 | 426 |
| LY96     | 0.40231  | 1.86E-21 | 3.67E-20 | 515 | 515 |
| AMPD1    | 0.402418 | 1.81E-21 | 3.57E-20 | 515 | 492 |
| SSPN     | 0.402519 | 1.77E-21 | 3.49E-20 | 515 | 515 |
| CD163L1  | 0.402657 | 1.71E-21 | 3.37E-20 | 515 | 515 |
| SLC24A4  | 0.402697 | 1.69E-21 | 3.34E-20 | 515 | 511 |
| CNRIP1   | 0.402884 | 1.61E-21 | 3.19E-20 | 515 | 515 |
| HEMGN    | 0.402981 | 1.57E-21 | 3.12E-20 | 515 | 317 |
| C14orf64 | 0.403029 | 1.55E-21 | 3.09E-20 | 515 | 508 |
| AIM1     | 0.403306 | 1.45E-21 | 2.88E-20 | 515 | 515 |
| VIM      | 0.403569 | 1.36E-21 | 2.70E-20 | 515 | 515 |
| PDE1B    | 0.403626 | 1.34E-21 | 2.67E-20 | 515 | 515 |
| KIAA1755 | 0.404722 | 1.02E-21 | 2.03E-20 | 515 | 515 |
| KEL      | 0.40473  | 1.02E-21 | 2.03E-20 | 515 | 474 |
| TGM2     | 0.405585 | 8.20E-22 | 1.64E-20 | 515 | 515 |
| EGR3     | 0.405826 | 7.72E-22 | 1.54E-20 | 515 | 515 |
| OSTF1    | 0.405881 | 7.61E-22 | 1.52E-20 | 515 | 515 |
| BANK1    | 0.406071 | 7.25E-22 | 1.45E-20 | 515 | 515 |
| CD200    | 0.406515 | 6.49E-22 | 1.30E-20 | 515 | 515 |
| TMEM200A | 0.406745 | 6.12E-22 | 1.23E-20 | 515 | 515 |
| NAAA     | 0.407353 | 5.25E-22 | 1.05E-20 | 515 | 515 |
| KLF12    | 0.40809  | 4.36E-22 | 8.76E-21 | 515 | 515 |
| RNF166   | 0.408414 | 4.01E-22 | 8.08E-21 | 515 | 515 |
| ATP1A4   | 0.408432 | 3.99E-22 | 8.05E-21 | 515 | 378 |
| LYPD5    | 0.408459 | 3.97E-22 | 8.00E-21 | 515 | 515 |
| APOBEC3A | 0.408492 | 3.93E-22 | 7.94E-21 | 515 | 514 |
| MYBPC2   | 0.408539 | 3.89E-22 | 7.86E-21 | 515 | 503 |
| CAMK1G   | 0.408598 | 3.83E-22 | 7.75E-21 | 515 | 514 |
| GPR137B  | 0.408709 | 3.72E-22 | 7.54E-21 | 515 | 515 |
| HTR7     | 0.409176 | 3.31E-22 | 6.70E-21 | 515 | 513 |
| CSF1     | 0.409294 | 3.21E-22 | 6.51E-21 | 515 | 515 |



|           |          |          |          |     |     |
|-----------|----------|----------|----------|-----|-----|
| IFNAR2    | 0.409328 | 3.18E-22 | 6.46E-21 | 515 | 515 |
| SH2D1B    | 0.4095   | 3.04E-22 | 6.19E-21 | 515 | 510 |
| MYO5A     | 0.409706 | 2.89E-22 | 5.88E-21 | 515 | 515 |
| MS4A14    | 0.409929 | 2.73E-22 | 5.56E-21 | 515 | 515 |
| CCL2      | 0.410147 | 2.58E-22 | 5.26E-21 | 515 | 515 |
| C14orf182 | 0.410223 | 2.53E-22 | 5.17E-21 | 515 | 509 |
| SLFN11    | 0.410774 | 2.20E-22 | 4.49E-21 | 515 | 515 |
| HPS5      | 0.41086  | 2.15E-22 | 4.40E-21 | 515 | 515 |
| CLIC2     | 0.410972 | 2.09E-22 | 4.28E-21 | 515 | 515 |
| LPAR5     | 0.411148 | 2.00E-22 | 4.10E-21 | 515 | 515 |
| IGDCC4    | 0.411275 | 1.93E-22 | 3.97E-21 | 515 | 515 |
| AMPD3     | 0.411539 | 1.81E-22 | 3.71E-21 | 515 | 515 |
| C18orf1   | 0.411664 | 1.75E-22 | 3.60E-21 | 515 | 515 |
| ATG7      | 0.411874 | 1.66E-22 | 3.41E-21 | 515 | 515 |
| ABCA9     | 0.412417 | 1.44E-22 | 2.97E-21 | 515 | 515 |
| RCBTB2    | 0.412454 | 1.43E-22 | 2.95E-21 | 515 | 515 |
| LRRK1     | 0.413102 | 1.21E-22 | 2.50E-21 | 515 | 515 |
| NFKBIE    | 0.413288 | 1.15E-22 | 2.38E-21 | 515 | 515 |
| IL18      | 0.413521 | 1.09E-22 | 2.25E-21 | 515 | 515 |
| CEACAM4   | 0.413857 | 9.95E-23 | 2.06E-21 | 515 | 508 |
| PARP14    | 0.413958 | 9.69E-23 | 2.01E-21 | 515 | 515 |
| ERAP1     | 0.413963 | 9.68E-23 | 2.01E-21 | 515 | 515 |
| CUX2      | 0.414132 | 9.27E-23 | 1.93E-21 | 515 | 477 |
| CSTA      | 0.414298 | 8.88E-23 | 1.85E-21 | 515 | 515 |
| TNFSF10   | 0.414394 | 8.66E-23 | 1.80E-21 | 515 | 515 |
| LOC285830 | 0.414446 | 8.54E-23 | 1.78E-21 | 515 | 515 |
| ADPRH     | 0.414653 | 8.10E-23 | 1.69E-21 | 515 | 515 |
| NMI       | 0.414774 | 7.85E-23 | 1.64E-21 | 515 | 515 |
| TNFSF12-T | 0.414904 | 7.59E-23 | 1.59E-21 | 515 | 510 |
| HAAO      | 0.415361 | 6.74E-23 | 1.41E-21 | 515 | 515 |
| STAB1     | 0.415383 | 6.70E-23 | 1.40E-21 | 515 | 515 |
| CD1C      | 0.416033 | 5.66E-23 | 1.19E-21 | 515 | 515 |
| GPRIN3    | 0.416074 | 5.60E-23 | 1.17E-21 | 515 | 515 |
| OLFML1    | 0.416269 | 5.32E-23 | 1.12E-21 | 515 | 515 |
| KLRC3     | 0.416291 | 5.29E-23 | 1.11E-21 | 515 | 474 |
| RASSF5    | 0.416428 | 5.10E-23 | 1.07E-21 | 515 | 515 |
| C6orf204  | 0.41676  | 4.68E-23 | 9.87E-22 | 515 | 515 |
| SYT11     | 0.417072 | 4.31E-23 | 9.10E-22 | 515 | 515 |
| RRN3P2    | 0.417084 | 4.30E-23 | 9.08E-22 | 515 | 515 |
| LOC283663 | 0.417575 | 3.78E-23 | 8.00E-22 | 515 | 515 |
| TNIP3     | 0.417765 | 3.60E-23 | 7.62E-22 | 515 | 514 |
| PLA1A     | 0.418113 | 3.28E-23 | 6.96E-22 | 515 | 515 |
| CD1E      | 0.418842 | 2.71E-23 | 5.76E-22 | 515 | 510 |
| KCNMB1    | 0.418937 | 2.65E-23 | 5.62E-22 | 515 | 515 |
| RARRES1   | 0.419648 | 2.19E-23 | 4.66E-22 | 515 | 515 |
| C17orf66  | 0.419954 | 2.02E-23 | 4.31E-22 | 515 | 326 |
| CLNK      | 0.420287 | 1.85E-23 | 3.95E-22 | 515 | 453 |
| RAB30     | 0.420672 | 1.67E-23 | 3.57E-22 | 515 | 515 |
| DTHD1     | 0.421027 | 1.52E-23 | 3.25E-22 | 515 | 493 |
| IDO2      | 0.421192 | 1.46E-23 | 3.12E-22 | 515 | 498 |
| UBASH3B   | 0.421916 | 1.20E-23 | 2.58E-22 | 515 | 515 |
| LXN       | 0.421959 | 1.19E-23 | 2.55E-22 | 515 | 515 |
| BEND4     | 0.422009 | 1.17E-23 | 2.52E-22 | 515 | 483 |
| PMP22     | 0.422535 | 1.02E-23 | 2.19E-22 | 515 | 515 |

|           |          |          |          |     |     |
|-----------|----------|----------|----------|-----|-----|
| PSTPIP2   | 0.422605 | 1.00E-23 | 2.15E-22 | 515 | 515 |
| HDC       | 0.422706 | 9.75E-24 | 2.10E-22 | 515 | 513 |
| SMAP2     | 0.423119 | 8.74E-24 | 1.88E-22 | 515 | 515 |
| RGS10     | 0.423402 | 8.10E-24 | 1.75E-22 | 515 | 515 |
| IL21      | 0.423642 | 7.60E-24 | 1.64E-22 | 515 | 192 |
| TXLNB     | 0.423771 | 7.34E-24 | 1.59E-22 | 515 | 514 |
| EGFL6     | 0.423956 | 6.99E-24 | 1.51E-22 | 515 | 515 |
| UBA7      | 0.424535 | 5.98E-24 | 1.30E-22 | 515 | 515 |
| SIGLEC14  | 0.424852 | 5.50E-24 | 1.19E-22 | 515 | 496 |
| SLC2A5    | 0.424919 | 5.40E-24 | 1.17E-22 | 515 | 515 |
| COL29A1   | 0.425163 | 5.06E-24 | 1.10E-22 | 515 | 506 |
| GRAP      | 0.425375 | 4.78E-24 | 1.04E-22 | 515 | 515 |
| STK17A    | 0.425528 | 4.58E-24 | 9.98E-23 | 515 | 515 |
| TREML2    | 0.425555 | 4.55E-24 | 9.92E-23 | 515 | 512 |
| ARL11     | 0.42556  | 4.54E-24 | 9.92E-23 | 515 | 515 |
| IFI44     | 0.426064 | 3.97E-24 | 8.67E-23 | 515 | 515 |
| APOL2     | 0.426073 | 3.96E-24 | 8.66E-23 | 515 | 515 |
| CD44      | 0.42626  | 3.76E-24 | 8.24E-23 | 515 | 515 |
| WNT10A    | 0.426324 | 3.70E-24 | 8.11E-23 | 515 | 515 |
| SLC6A12   | 0.426624 | 3.41E-24 | 7.49E-23 | 515 | 515 |
| LYSMD2    | 0.426859 | 3.20E-24 | 7.04E-23 | 515 | 515 |
| PEA15     | 0.42694  | 3.13E-24 | 6.89E-23 | 515 | 515 |
| ENTHD1    | 0.427292 | 2.85E-24 | 6.27E-23 | 515 | 469 |
| CTSC      | 0.427725 | 2.53E-24 | 5.58E-23 | 515 | 515 |
| TBC1D4    | 0.427876 | 2.43E-24 | 5.37E-23 | 515 | 515 |
| LOC154761 | 0.428203 | 2.23E-24 | 4.92E-23 | 515 | 515 |
| CADM3     | 0.429111 | 1.74E-24 | 3.85E-23 | 515 | 513 |
| FKBP15    | 0.429309 | 1.65E-24 | 3.65E-23 | 515 | 515 |
| FAM113B   | 0.429375 | 1.62E-24 | 3.59E-23 | 515 | 515 |
| HERC5     | 0.430484 | 1.20E-24 | 2.65E-23 | 515 | 515 |
| FLJ40330  | 0.430524 | 1.18E-24 | 2.63E-23 | 515 | 515 |
| JAZF1     | 0.430625 | 1.15E-24 | 2.56E-23 | 515 | 515 |
| TNFRSF4   | 0.430928 | 1.06E-24 | 2.36E-23 | 515 | 515 |
| DAB2      | 0.431346 | 9.45E-25 | 2.10E-23 | 515 | 515 |
| WDFY4     | 0.431476 | 9.11E-25 | 2.03E-23 | 515 | 515 |
| POPDC2    | 0.431586 | 8.85E-25 | 1.98E-23 | 515 | 515 |
| TXK       | 0.431592 | 8.83E-25 | 1.97E-23 | 515 | 514 |
| CLEC1A    | 0.432039 | 7.81E-25 | 1.75E-23 | 515 | 515 |
| ANKRD22   | 0.432392 | 7.09E-25 | 1.59E-23 | 515 | 515 |
| GPR68     | 0.432835 | 6.27E-25 | 1.41E-23 | 515 | 515 |
| TYMP      | 0.433187 | 5.69E-25 | 1.28E-23 | 515 | 515 |
| ADAM6     | 0.433454 | 5.29E-25 | 1.19E-23 | 515 | 515 |
| MEOX1     | 0.433614 | 5.06E-25 | 1.14E-23 | 515 | 514 |
| TARP      | 0.433849 | 4.74E-25 | 1.07E-23 | 515 | 512 |
| APOE      | 0.43385  | 4.74E-25 | 1.07E-23 | 515 | 515 |
| NTRK1     | 0.433948 | 4.61E-25 | 1.04E-23 | 515 | 507 |
| LOC96610  | 0.434017 | 4.53E-25 | 1.02E-23 | 515 | 515 |
| C19orf35  | 0.434652 | 3.80E-25 | 8.60E-24 | 515 | 512 |
| ABCB1     | 0.434777 | 3.67E-25 | 8.31E-24 | 515 | 515 |
| BLNK      | 0.434946 | 3.50E-25 | 7.94E-24 | 515 | 515 |
| EMR4P     | 0.435068 | 3.38E-25 | 7.68E-24 | 515 | 512 |
| LYL1      | 0.4351   | 3.35E-25 | 7.63E-24 | 515 | 515 |
| CRLF3     | 0.43568  | 2.85E-25 | 6.50E-24 | 515 | 515 |
| OSTM1     | 0.4358   | 2.76E-25 | 6.29E-24 | 515 | 515 |

|          |          |          |          |     |     |
|----------|----------|----------|----------|-----|-----|
| RGS13    | 0.435833 | 2.74E-25 | 6.24E-24 | 515 | 509 |
| FAM23A   | 0.436003 | 2.61E-25 | 5.96E-24 | 515 | 513 |
| DSE      | 0.436072 | 2.56E-25 | 5.85E-24 | 515 | 515 |
| KCNMA1   | 0.436742 | 2.12E-25 | 4.86E-24 | 515 | 515 |
| GP1BA    | 0.437081 | 1.93E-25 | 4.43E-24 | 515 | 504 |
| IL1B     | 0.437744 | 1.60E-25 | 3.68E-24 | 515 | 515 |
| FAM55C   | 0.438015 | 1.49E-25 | 3.42E-24 | 515 | 515 |
| ITGAE    | 0.438174 | 1.42E-25 | 3.27E-24 | 515 | 515 |
| CTSB     | 0.438175 | 1.42E-25 | 3.27E-24 | 515 | 515 |
| ACSM5    | 0.438254 | 1.39E-25 | 3.21E-24 | 515 | 494 |
| HIVEP3   | 0.438475 | 1.31E-25 | 3.02E-24 | 515 | 515 |
| OBFC2A   | 0.438544 | 1.28E-25 | 2.96E-24 | 515 | 515 |
| KLRC4    | 0.438938 | 1.15E-25 | 2.66E-24 | 515 | 366 |
| CTSK     | 0.439034 | 1.12E-25 | 2.59E-24 | 515 | 515 |
| TRIM14   | 0.439064 | 1.11E-25 | 2.57E-24 | 515 | 515 |
| SIGLEC11 | 0.439216 | 1.06E-25 | 2.46E-24 | 515 | 509 |
| SP110    | 0.439434 | 9.98E-26 | 2.32E-24 | 515 | 515 |
| HS3ST3B1 | 0.439544 | 9.68E-26 | 2.25E-24 | 515 | 510 |
| RSAD2    | 0.43967  | 9.34E-26 | 2.18E-24 | 515 | 515 |
| TOX2     | 0.439727 | 9.19E-26 | 2.14E-24 | 515 | 515 |
| NR1H3    | 0.44032  | 7.78E-26 | 1.82E-24 | 515 | 515 |
| SH3BGRL  | 0.440336 | 7.74E-26 | 1.81E-24 | 515 | 515 |
| SIGLEC6  | 0.440827 | 6.74E-26 | 1.58E-24 | 515 | 497 |
| KAT2B    | 0.440956 | 6.50E-26 | 1.52E-24 | 515 | 515 |
| MMP9     | 0.44096  | 6.49E-26 | 1.52E-24 | 515 | 515 |
| EVL      | 0.441116 | 6.21E-26 | 1.46E-24 | 515 | 515 |
| SKAP1    | 0.441185 | 6.09E-26 | 1.43E-24 | 515 | 515 |
| LILRA5   | 0.441484 | 5.59E-26 | 1.32E-24 | 515 | 515 |
| STARD8   | 0.441697 | 5.27E-26 | 1.24E-24 | 515 | 515 |
| CARD9    | 0.442393 | 4.32E-26 | 1.02E-24 | 515 | 515 |
| TNFAIP2  | 0.442394 | 4.32E-26 | 1.02E-24 | 515 | 515 |
| CCL23    | 0.442529 | 4.16E-26 | 9.83E-25 | 515 | 504 |
| TRANK1   | 0.442594 | 4.08E-26 | 9.67E-25 | 515 | 515 |
| IL2      | 0.442642 | 4.03E-26 | 9.54E-25 | 515 | 305 |
| GIT2     | 0.443189 | 3.44E-26 | 8.18E-25 | 515 | 515 |
| ARHGAP18 | 0.443686 | 2.99E-26 | 7.11E-25 | 515 | 515 |
| C5orf58  | 0.443726 | 2.96E-26 | 7.03E-25 | 515 | 500 |
| DNAH8    | 0.443913 | 2.80E-26 | 6.67E-25 | 515 | 472 |
| DDO      | 0.444161 | 2.61E-26 | 6.23E-25 | 515 | 514 |
| TNFSF4   | 0.444218 | 2.57E-26 | 6.13E-25 | 515 | 515 |
| ADORA3   | 0.444585 | 2.31E-26 | 5.53E-25 | 515 | 515 |
| PLEKHA2  | 0.444983 | 2.06E-26 | 4.94E-25 | 515 | 515 |
| FAM65B   | 0.44573  | 1.66E-26 | 3.99E-25 | 515 | 515 |
| PSME2    | 0.445787 | 1.64E-26 | 3.93E-25 | 515 | 515 |
| BFSP2    | 0.445991 | 1.54E-26 | 3.71E-25 | 515 | 454 |
| OPTN     | 0.446294 | 1.41E-26 | 3.40E-25 | 515 | 515 |
| ANKRD55  | 0.446404 | 1.37E-26 | 3.30E-25 | 515 | 492 |
| PAPLN    | 0.446659 | 1.27E-26 | 3.07E-25 | 515 | 515 |
| TMEM119  | 0.446746 | 1.24E-26 | 3.00E-25 | 515 | 515 |
| LIPA     | 0.447095 | 1.12E-26 | 2.71E-25 | 515 | 515 |
| MAP3K14  | 0.447278 | 1.07E-26 | 2.58E-25 | 515 | 515 |
| EMR2     | 0.447449 | 1.01E-26 | 2.46E-25 | 515 | 515 |
| IFI35    | 0.447507 | 9.97E-27 | 2.42E-25 | 515 | 515 |
| IFI44L   | 0.447591 | 9.73E-27 | 2.36E-25 | 515 | 515 |

|          |          |          |          |     |     |
|----------|----------|----------|----------|-----|-----|
| BHLHE22  | 0.447885 | 8.93E-27 | 2.17E-25 | 515 | 515 |
| GRIP2    | 0.447947 | 8.78E-27 | 2.14E-25 | 515 | 484 |
| MSL3     | 0.447987 | 8.67E-27 | 2.11E-25 | 515 | 515 |
| ARHGD1B  | 0.448009 | 8.62E-27 | 2.10E-25 | 515 | 515 |
| PLXDC2   | 0.448052 | 8.51E-27 | 2.08E-25 | 515 | 515 |
| RASGEF1B | 0.448145 | 8.29E-27 | 2.03E-25 | 515 | 515 |
| ITGAD    | 0.448528 | 7.41E-27 | 1.82E-25 | 515 | 468 |
| MGC29506 | 0.449065 | 6.34E-27 | 1.56E-25 | 515 | 515 |
| GPR31    | 0.449767 | 5.17E-27 | 1.27E-25 | 515 | 282 |
| CYSLTR1  | 0.449868 | 5.02E-27 | 1.23E-25 | 515 | 515 |
| C5AR1    | 0.44988  | 5.00E-27 | 1.23E-25 | 515 | 515 |
| TSPAN33  | 0.449975 | 4.87E-27 | 1.20E-25 | 515 | 515 |
| SNAI3    | 0.450327 | 4.39E-27 | 1.08E-25 | 515 | 515 |
| FYN      | 0.45099  | 3.62E-27 | 8.94E-26 | 515 | 515 |
| C12orf35 | 0.451108 | 3.50E-27 | 8.65E-26 | 515 | 515 |
| AXL      | 0.451284 | 3.32E-27 | 8.22E-26 | 515 | 515 |
| OASL     | 0.452437 | 2.37E-27 | 5.87E-26 | 515 | 515 |
| PVALB    | 0.452672 | 2.21E-27 | 5.48E-26 | 515 | 466 |
| TREM2    | 0.453501 | 1.73E-27 | 4.30E-26 | 515 | 515 |
| NUB1     | 0.453515 | 1.72E-27 | 4.29E-26 | 515 | 515 |
| ST8SIA4  | 0.453635 | 1.66E-27 | 4.15E-26 | 515 | 515 |
| GNAI2    | 0.453652 | 1.65E-27 | 4.13E-26 | 515 | 515 |
| FPR2     | 0.453873 | 1.55E-27 | 3.87E-26 | 515 | 513 |
| CLEC9A   | 0.454874 | 1.15E-27 | 2.88E-26 | 515 | 460 |
| GNB4     | 0.454893 | 1.15E-27 | 2.87E-26 | 515 | 515 |
| TCF7     | 0.454962 | 1.12E-27 | 2.82E-26 | 515 | 515 |
| SUCNR1   | 0.455001 | 1.11E-27 | 2.79E-26 | 515 | 511 |
| SYK      | 0.455127 | 1.07E-27 | 2.69E-26 | 515 | 515 |
| RGS9     | 0.455291 | 1.02E-27 | 2.56E-26 | 515 | 514 |
| IFI16    | 0.455492 | 9.60E-28 | 2.42E-26 | 515 | 515 |
| GATA3    | 0.456034 | 8.17E-28 | 2.06E-26 | 515 | 515 |
| RELT     | 0.456174 | 7.83E-28 | 1.98E-26 | 515 | 515 |
| ARHGEF3  | 0.456327 | 7.49E-28 | 1.89E-26 | 515 | 515 |
| LGALS9   | 0.456451 | 7.21E-28 | 1.83E-26 | 515 | 515 |
| TLR6     | 0.456877 | 6.36E-28 | 1.61E-26 | 515 | 515 |
| IL12B    | 0.457372 | 5.48E-28 | 1.39E-26 | 515 | 501 |
| POU2AF1  | 0.457391 | 5.45E-28 | 1.39E-26 | 515 | 515 |
| STK4     | 0.457734 | 4.92E-28 | 1.25E-26 | 515 | 515 |
| PPM1M    | 0.458525 | 3.88E-28 | 9.89E-27 | 515 | 515 |
| RASGRP4  | 0.458864 | 3.51E-28 | 8.95E-27 | 515 | 515 |
| DBH      | 0.459129 | 3.24E-28 | 8.28E-27 | 515 | 506 |
| VPREB3   | 0.459525 | 2.87E-28 | 7.36E-27 | 515 | 513 |
| F13A1    | 0.45955  | 2.85E-28 | 7.31E-27 | 515 | 515 |
| PLCL2    | 0.459619 | 2.79E-28 | 7.17E-27 | 515 | 515 |
| PLD4     | 0.459692 | 2.73E-28 | 7.02E-27 | 515 | 515 |
| POU3F1   | 0.459964 | 2.52E-28 | 6.48E-27 | 515 | 507 |
| HLA-H    | 0.459997 | 2.49E-28 | 6.42E-27 | 515 | 515 |
| GAL3ST4  | 0.46009  | 2.42E-28 | 6.25E-27 | 515 | 515 |
| DENND1C  | 0.460275 | 2.29E-28 | 5.92E-27 | 515 | 515 |
| GHRL     | 0.460868 | 1.92E-28 | 4.96E-27 | 515 | 505 |
| C15orf27 | 0.461308 | 1.68E-28 | 4.34E-27 | 515 | 515 |
| PDE4B    | 0.461386 | 1.64E-28 | 4.25E-27 | 515 | 515 |
| MGC12916 | 0.461425 | 1.62E-28 | 4.20E-27 | 515 | 510 |
| HLA-DQB1 | 0.461538 | 1.57E-28 | 4.07E-27 | 515 | 515 |

|           |          |          |          |     |     |
|-----------|----------|----------|----------|-----|-----|
| EPB41L2   | 0.461833 | 1.43E-28 | 3.72E-27 | 515 | 515 |
| TREML1    | 0.461885 | 1.41E-28 | 3.67E-27 | 515 | 485 |
| HLA-DRB5  | 0.462033 | 1.35E-28 | 3.51E-27 | 515 | 515 |
| SAMD9     | 0.462067 | 1.33E-28 | 3.48E-27 | 515 | 515 |
| DEF6      | 0.462067 | 1.33E-28 | 3.48E-27 | 515 | 515 |
| IFIT2     | 0.462618 | 1.13E-28 | 2.95E-27 | 515 | 515 |
| APOBEC3F  | 0.462631 | 1.12E-28 | 2.95E-27 | 515 | 515 |
| CD38      | 0.462983 | 1.01E-28 | 2.65E-27 | 515 | 515 |
| PTGS1     | 0.463197 | 9.45E-29 | 2.49E-27 | 515 | 515 |
| C7orf58   | 0.464814 | 5.77E-29 | 1.52E-27 | 515 | 515 |
| PRKCH     | 0.465055 | 5.36E-29 | 1.41E-27 | 515 | 515 |
| LOC653653 | 0.465235 | 5.07E-29 | 1.34E-27 | 515 | 515 |
| MYO1G     | 0.465503 | 4.67E-29 | 1.23E-27 | 515 | 515 |
| HLA-L     | 0.465969 | 4.05E-29 | 1.07E-27 | 515 | 515 |
| KIAA1949  | 0.46617  | 3.80E-29 | 1.01E-27 | 515 | 515 |
| HLA-A     | 0.467236 | 2.74E-29 | 7.27E-28 | 515 | 515 |
| FCRL2     | 0.467969 | 2.18E-29 | 5.80E-28 | 515 | 515 |
| LHFPL2    | 0.468363 | 1.93E-29 | 5.14E-28 | 515 | 515 |
| GPSM3     | 0.468588 | 1.80E-29 | 4.80E-28 | 515 | 515 |
| C12orf59  | 0.469337 | 1.43E-29 | 3.81E-28 | 515 | 514 |
| MSC       | 0.469357 | 1.42E-29 | 3.79E-28 | 515 | 515 |
| PSMB10    | 0.469602 | 1.32E-29 | 3.52E-28 | 515 | 515 |
| RLTPR     | 0.469607 | 1.31E-29 | 3.52E-28 | 515 | 515 |
| PLCXD2    | 0.469814 | 1.23E-29 | 3.30E-28 | 515 | 515 |
| RHOG      | 0.469844 | 1.22E-29 | 3.28E-28 | 515 | 515 |
| PSMB8     | 0.471075 | 8.31E-30 | 2.24E-28 | 515 | 515 |
| LY75      | 0.471357 | 7.61E-30 | 2.05E-28 | 515 | 515 |
| GMIP      | 0.471696 | 6.84E-30 | 1.85E-28 | 515 | 515 |
| LPAR6     | 0.472124 | 5.98E-30 | 1.62E-28 | 515 | 515 |
| SOD2      | 0.472571 | 5.20E-30 | 1.41E-28 | 515 | 515 |
| PNOC      | 0.472864 | 4.74E-30 | 1.28E-28 | 515 | 512 |
| RAB39B    | 0.473007 | 4.53E-30 | 1.23E-28 | 515 | 515 |
| CCL8      | 0.473168 | 4.31E-30 | 1.17E-28 | 515 | 515 |
| S100B     | 0.47338  | 4.03E-30 | 1.10E-28 | 515 | 515 |
| MFSD1     | 0.474074 | 3.24E-30 | 8.82E-29 | 515 | 515 |
| RUFY4     | 0.47502  | 2.40E-30 | 6.55E-29 | 515 | 508 |
| NECAP2    | 0.475236 | 2.24E-30 | 6.12E-29 | 515 | 515 |
| APOC2     | 0.47525  | 2.23E-30 | 6.10E-29 | 515 | 515 |
| OAS2      | 0.475453 | 2.09E-30 | 5.73E-29 | 515 | 515 |
| TNFRSF13C | 0.475456 | 2.09E-30 | 5.73E-29 | 515 | 505 |
| SGTB      | 0.475491 | 2.07E-30 | 5.68E-29 | 515 | 515 |
| GNMB      | 0.475588 | 2.01E-30 | 5.51E-29 | 515 | 515 |
| SEMA4D    | 0.475608 | 1.99E-30 | 5.49E-29 | 515 | 515 |
| NAIP      | 0.475724 | 1.92E-30 | 5.30E-29 | 515 | 515 |
| CFP       | 0.476036 | 1.74E-30 | 4.80E-29 | 515 | 515 |
| NCR1      | 0.47644  | 1.53E-30 | 4.23E-29 | 515 | 414 |
| PIP4K2A   | 0.476583 | 1.46E-30 | 4.05E-29 | 515 | 515 |
| CPNE5     | 0.476893 | 1.32E-30 | 3.67E-29 | 515 | 515 |
| DDX60     | 0.477019 | 1.27E-30 | 3.53E-29 | 515 | 515 |
| LOC400696 | 0.477037 | 1.26E-30 | 3.52E-29 | 515 | 459 |
| LOC284749 | 0.47708  | 1.25E-30 | 3.47E-29 | 515 | 471 |
| MAF       | 0.477276 | 1.17E-30 | 3.27E-29 | 515 | 515 |
| TIMD4     | 0.477366 | 1.14E-30 | 3.18E-29 | 515 | 497 |
| EMILIN2   | 0.477588 | 1.06E-30 | 2.97E-29 | 515 | 515 |

|          |          |          |          |     |     |
|----------|----------|----------|----------|-----|-----|
| CTSW     | 0.479003 | 6.74E-31 | 1.89E-29 | 515 | 515 |
| CHIT1    | 0.479111 | 6.51E-31 | 1.83E-29 | 515 | 515 |
| AICDA    | 0.479333 | 6.07E-31 | 1.70E-29 | 515 | 429 |
| PARP9    | 0.479778 | 5.26E-31 | 1.48E-29 | 515 | 515 |
| KLRC1    | 0.480168 | 4.64E-31 | 1.31E-29 | 515 | 504 |
| ATP6V1B2 | 0.480462 | 4.22E-31 | 1.19E-29 | 515 | 515 |
| CYP4F22  | 0.480664 | 3.95E-31 | 1.12E-29 | 515 | 490 |
| APOC1    | 0.480808 | 3.77E-31 | 1.07E-29 | 515 | 515 |
| RASGRP1  | 0.480945 | 3.61E-31 | 1.02E-29 | 515 | 515 |
| DPF3     | 0.481121 | 3.41E-31 | 9.66E-30 | 515 | 513 |
| TMEM156  | 0.481338 | 3.18E-31 | 9.02E-30 | 515 | 514 |
| LACTB    | 0.481544 | 2.97E-31 | 8.45E-30 | 515 | 515 |
| KCNA3    | 0.481688 | 2.84E-31 | 8.08E-30 | 515 | 514 |
| PRAM1    | 0.481821 | 2.72E-31 | 7.75E-30 | 515 | 515 |
| RARRES3  | 0.482281 | 2.34E-31 | 6.69E-30 | 515 | 515 |
| P2RX5    | 0.482462 | 2.21E-31 | 6.31E-30 | 515 | 515 |
| CCND2    | 0.484392 | 1.18E-31 | 3.37E-30 | 515 | 515 |
| CDX1     | 0.484489 | 1.14E-31 | 3.27E-30 | 515 | 505 |
| PTPN6    | 0.484854 | 1.01E-31 | 2.91E-30 | 515 | 515 |
| SLC2A9   | 0.485061 | 9.46E-32 | 2.72E-30 | 515 | 515 |
| PRKCQ    | 0.485326 | 8.67E-32 | 2.50E-30 | 515 | 515 |
| ZCCHC18  | 0.48541  | 8.44E-32 | 2.43E-30 | 515 | 514 |
| FCER2    | 0.485488 | 8.23E-32 | 2.38E-30 | 515 | 490 |
| CCRL2    | 0.485639 | 7.83E-32 | 2.26E-30 | 515 | 515 |
| KLHDC7B  | 0.48571  | 7.65E-32 | 2.22E-30 | 515 | 515 |
| CCL13    | 0.486545 | 5.81E-32 | 1.69E-30 | 515 | 515 |
| CPVL     | 0.486653 | 5.61E-32 | 1.63E-30 | 515 | 515 |
| GTSF1L   | 0.487004 | 5.00E-32 | 1.45E-30 | 515 | 358 |
| CCL17    | 0.48707  | 4.89E-32 | 1.42E-30 | 515 | 509 |
| C14orf73 | 0.487331 | 4.49E-32 | 1.31E-30 | 515 | 505 |
| FAM49A   | 0.487801 | 3.84E-32 | 1.12E-30 | 515 | 515 |
| P2RX1    | 0.487897 | 3.72E-32 | 1.09E-30 | 515 | 515 |
| LIMD2    | 0.488    | 3.60E-32 | 1.05E-30 | 515 | 515 |
| ACP5     | 0.488448 | 3.10E-32 | 9.11E-31 | 515 | 515 |
| MICB     | 0.488515 | 3.03E-32 | 8.92E-31 | 515 | 515 |
| CASS4    | 0.488579 | 2.97E-32 | 8.74E-31 | 515 | 515 |
| IL26     | 0.48947  | 2.21E-32 | 6.52E-31 | 515 | 334 |
| MIAT     | 0.489878 | 1.93E-32 | 5.70E-31 | 515 | 515 |
| IL32     | 0.490171 | 1.75E-32 | 5.18E-31 | 515 | 515 |
| LILRB5   | 0.49061  | 1.51E-32 | 4.48E-31 | 515 | 515 |
| CD1B     | 0.491139 | 1.27E-32 | 3.76E-31 | 515 | 497 |
| CALHM2   | 0.491888 | 9.87E-33 | 2.93E-31 | 515 | 515 |
| IRF5     | 0.49202  | 9.44E-33 | 2.81E-31 | 515 | 515 |
| BMP2K    | 0.493328 | 6.09E-33 | 1.81E-31 | 515 | 515 |
| FCGR2A   | 0.493495 | 5.75E-33 | 1.72E-31 | 515 | 515 |
| TPK1     | 0.493518 | 5.71E-33 | 1.70E-31 | 515 | 515 |
| TRIM21   | 0.493525 | 5.69E-33 | 1.70E-31 | 515 | 515 |
| GPR155   | 0.494498 | 4.10E-33 | 1.23E-31 | 515 | 515 |
| FCRL5    | 0.495171 | 3.27E-33 | 9.80E-32 | 515 | 515 |
| IL7      | 0.495743 | 2.69E-33 | 8.09E-32 | 515 | 515 |
| JAKMIP1  | 0.496368 | 2.18E-33 | 6.55E-32 | 515 | 514 |
| BHLHE41  | 0.496463 | 2.11E-33 | 6.35E-32 | 515 | 515 |
| GNLY     | 0.49678  | 1.89E-33 | 5.71E-32 | 515 | 515 |
| GPR25    | 0.496966 | 1.78E-33 | 5.37E-32 | 515 | 474 |

|           |          |          |          |     |     |
|-----------|----------|----------|----------|-----|-----|
| CCDC109B  | 0.497001 | 1.75E-33 | 5.31E-32 | 515 | 515 |
| CD209     | 0.497184 | 1.65E-33 | 5.00E-32 | 515 | 515 |
| SLC2A6    | 0.497213 | 1.63E-33 | 4.96E-32 | 515 | 515 |
| IL3RA     | 0.497236 | 1.62E-33 | 4.93E-32 | 515 | 515 |
| TXNDC3    | 0.497412 | 1.53E-33 | 4.65E-32 | 515 | 483 |
| C14orf49  | 0.497532 | 1.46E-33 | 4.47E-32 | 515 | 514 |
| TM6SF1    | 0.497701 | 1.38E-33 | 4.22E-32 | 515 | 515 |
| IGJ       | 0.498082 | 1.21E-33 | 3.71E-32 | 515 | 515 |
| C4orf7    | 0.498684 | 9.88E-34 | 3.03E-32 | 515 | 466 |
| N4BP2L1   | 0.499343 | 7.88E-34 | 2.42E-32 | 515 | 515 |
| TM7SF4    | 0.499396 | 7.74E-34 | 2.38E-32 | 515 | 512 |
| SEPT6     | 0.499791 | 6.76E-34 | 2.08E-32 | 515 | 515 |
| LOC339524 | 0.500207 | 5.85E-34 | 1.81E-32 | 515 | 515 |
| TNFRSF17  | 0.500372 | 5.53E-34 | 1.71E-32 | 515 | 512 |
| SOCS1     | 0.500459 | 5.37E-34 | 1.66E-32 | 515 | 515 |
| IL27      | 0.501259 | 4.07E-34 | 1.26E-32 | 515 | 459 |
| CLEC2B    | 0.501554 | 3.68E-34 | 1.14E-32 | 515 | 515 |
| HLA-DMA   | 0.502027 | 3.12E-34 | 9.71E-33 | 515 | 515 |
| GPR132    | 0.502497 | 2.65E-34 | 8.26E-33 | 515 | 515 |
| VNN2      | 0.503185 | 2.09E-34 | 6.52E-33 | 515 | 515 |
| FAM129C   | 0.504013 | 1.57E-34 | 4.89E-33 | 515 | 499 |
| CXorf65   | 0.505162 | 1.05E-34 | 3.28E-33 | 515 | 400 |
| SPOCK2    | 0.505848 | 8.25E-35 | 2.58E-33 | 515 | 515 |
| IFIH1     | 0.505877 | 8.16E-35 | 2.56E-33 | 515 | 515 |
| NELL2     | 0.50594  | 7.99E-35 | 2.51E-33 | 515 | 514 |
| ZNF804A   | 0.506015 | 7.78E-35 | 2.45E-33 | 515 | 511 |
| APOL4     | 0.506371 | 6.87E-35 | 2.16E-33 | 515 | 515 |
| GM2A      | 0.506601 | 6.33E-35 | 2.00E-33 | 515 | 515 |
| PAX5      | 0.507236 | 5.06E-35 | 1.60E-33 | 515 | 503 |
| APOBEC3C  | 0.507318 | 4.92E-35 | 1.56E-33 | 515 | 515 |
| CFLAR     | 0.50766  | 4.36E-35 | 1.38E-33 | 515 | 515 |
| FAM115C   | 0.507945 | 3.94E-35 | 1.25E-33 | 515 | 515 |
| SIRPB1    | 0.508136 | 3.69E-35 | 1.17E-33 | 515 | 515 |
| CCL22     | 0.508479 | 3.27E-35 | 1.04E-33 | 515 | 515 |
| SLFN14    | 0.50962  | 2.18E-35 | 6.96E-34 | 515 | 429 |
| MEFV      | 0.509805 | 2.04E-35 | 6.53E-34 | 515 | 514 |
| SLC8A1    | 0.509978 | 1.92E-35 | 6.15E-34 | 515 | 515 |
| PRDM1     | 0.510151 | 1.80E-35 | 5.79E-34 | 515 | 515 |
| KIAA0125  | 0.510337 | 1.69E-35 | 5.43E-34 | 515 | 514 |
| RTP4      | 0.510606 | 1.53E-35 | 4.94E-34 | 515 | 515 |
| NAALADL1  | 0.511093 | 1.29E-35 | 4.16E-34 | 515 | 515 |
| ANKRD58   | 0.511619 | 1.07E-35 | 3.45E-34 | 515 | 514 |
| ARRDC5    | 0.511805 | 1.00E-35 | 3.24E-34 | 515 | 509 |
| HCG26     | 0.512058 | 9.14E-36 | 2.96E-34 | 515 | 515 |
| CECR1     | 0.512464 | 7.90E-36 | 2.56E-34 | 515 | 515 |
| AKAP5     | 0.512596 | 7.54E-36 | 2.45E-34 | 515 | 515 |
| GAS7      | 0.512844 | 6.89E-36 | 2.24E-34 | 515 | 515 |
| MRC1      | 0.512956 | 6.62E-36 | 2.16E-34 | 515 | 515 |
| CLEC4C    | 0.513002 | 6.51E-36 | 2.13E-34 | 515 | 357 |
| SPATC1    | 0.513525 | 5.40E-36 | 1.77E-34 | 515 | 496 |
| RGS1      | 0.514641 | 3.61E-36 | 1.18E-34 | 515 | 515 |
| MSR1      | 0.514911 | 3.27E-36 | 1.07E-34 | 515 | 515 |
| TLR1      | 0.515258 | 2.89E-36 | 9.50E-35 | 515 | 515 |
| CD14      | 0.51556  | 2.59E-36 | 8.52E-35 | 515 | 515 |

|           |          |          |          |     |     |
|-----------|----------|----------|----------|-----|-----|
| SLC37A2   | 0.515763 | 2.41E-36 | 7.94E-35 | 515 | 515 |
| ST8SIA1   | 0.515952 | 2.25E-36 | 7.42E-35 | 515 | 515 |
| POU2F2    | 0.516609 | 1.77E-36 | 5.86E-35 | 515 | 515 |
| TMEM150B  | 0.517033 | 1.52E-36 | 5.03E-35 | 515 | 513 |
| C17orf60  | 0.517067 | 1.50E-36 | 4.97E-35 | 515 | 515 |
| TMEM149   | 0.517392 | 1.33E-36 | 4.43E-35 | 515 | 515 |
| OSCAR     | 0.517897 | 1.11E-36 | 3.69E-35 | 515 | 515 |
| RAB8B     | 0.517933 | 1.09E-36 | 3.65E-35 | 515 | 515 |
| HLA-C     | 0.518197 | 9.92E-37 | 3.32E-35 | 515 | 515 |
| FCN1      | 0.518273 | 9.65E-37 | 3.23E-35 | 515 | 515 |
| ADORA2A   | 0.518501 | 8.88E-37 | 2.98E-35 | 515 | 515 |
| CD68      | 0.519793 | 5.53E-37 | 1.86E-35 | 515 | 515 |
| TNF       | 0.52008  | 4.98E-37 | 1.67E-35 | 515 | 515 |
| TNFRSF13E | 0.521207 | 3.29E-37 | 1.11E-35 | 515 | 508 |
| GPR34     | 0.521392 | 3.07E-37 | 1.04E-35 | 515 | 515 |
| SP100     | 0.521586 | 2.86E-37 | 9.66E-36 | 515 | 515 |
| FCRL6     | 0.521917 | 2.53E-37 | 8.56E-36 | 515 | 515 |
| C10orf54  | 0.522078 | 2.38E-37 | 8.08E-36 | 515 | 515 |
| IFIT3     | 0.522144 | 2.32E-37 | 7.90E-36 | 515 | 515 |
| ALOX5AP   | 0.522981 | 1.70E-37 | 5.80E-36 | 515 | 515 |
| ID01      | 0.523996 | 1.17E-37 | 3.98E-36 | 515 | 515 |
| FOLR2     | 0.524987 | 8.07E-38 | 2.76E-36 | 515 | 515 |
| KMO       | 0.525018 | 7.98E-38 | 2.73E-36 | 515 | 515 |
| FPR1      | 0.525047 | 7.89E-38 | 2.71E-36 | 515 | 515 |
| STAMBPL1  | 0.525234 | 7.36E-38 | 2.53E-36 | 515 | 515 |
| CASP5     | 0.525388 | 6.95E-38 | 2.39E-36 | 515 | 478 |
| EMP3      | 0.525766 | 6.03E-38 | 2.08E-36 | 515 | 515 |
| TSPAN32   | 0.525863 | 5.82E-38 | 2.01E-36 | 515 | 514 |
| BIRC3     | 0.526498 | 4.58E-38 | 1.59E-36 | 515 | 515 |
| NOD2      | 0.527124 | 3.62E-38 | 1.25E-36 | 515 | 515 |
| BATF2     | 0.527157 | 3.58E-38 | 1.24E-36 | 515 | 515 |
| CD79A     | 0.527271 | 3.43E-38 | 1.19E-36 | 515 | 515 |
| KCNK13    | 0.527567 | 3.07E-38 | 1.07E-36 | 515 | 514 |
| S1PR4     | 0.527762 | 2.85E-38 | 9.94E-37 | 515 | 515 |
| MEI1      | 0.528193 | 2.42E-38 | 8.46E-37 | 515 | 515 |
| FCRL4     | 0.52873  | 1.98E-38 | 6.92E-37 | 515 | 468 |
| CARD8     | 0.528823 | 1.91E-38 | 6.69E-37 | 515 | 515 |
| C19orf38  | 0.529317 | 1.58E-38 | 5.56E-37 | 515 | 515 |
| LILRA6    | 0.529471 | 1.49E-38 | 5.25E-37 | 515 | 515 |
| PTGDS     | 0.529676 | 1.38E-38 | 4.87E-37 | 515 | 515 |
| C9orf139  | 0.529948 | 1.25E-38 | 4.40E-37 | 515 | 504 |
| ABCA6     | 0.530068 | 1.19E-38 | 4.21E-37 | 515 | 515 |
| RBP5      | 0.530655 | 9.52E-39 | 3.37E-37 | 515 | 515 |
| ABI3BP    | 0.530683 | 9.42E-39 | 3.34E-37 | 515 | 515 |
| PLCG2     | 0.530913 | 8.62E-39 | 3.07E-37 | 515 | 515 |
| MATK      | 0.531231 | 7.64E-39 | 2.72E-37 | 515 | 515 |
| ITPRIPL1  | 0.531366 | 7.26E-39 | 2.59E-37 | 515 | 514 |
| HTRA4     | 0.531712 | 6.36E-39 | 2.27E-37 | 515 | 513 |
| BTN3A2    | 0.531858 | 6.01E-39 | 2.15E-37 | 515 | 515 |
| DOCK11    | 0.532266 | 5.15E-39 | 1.85E-37 | 515 | 515 |
| HLA-DQA2  | 0.532516 | 4.68E-39 | 1.68E-37 | 515 | 515 |
| C14orf139 | 0.53254  | 4.63E-39 | 1.67E-37 | 515 | 515 |
| RASGRP3   | 0.533013 | 3.86E-39 | 1.39E-37 | 515 | 515 |
| ADAP2     | 0.533044 | 3.82E-39 | 1.38E-37 | 515 | 515 |



|          |          |          |          |     |     |
|----------|----------|----------|----------|-----|-----|
| LILRA1   | 0.533271 | 3.50E-39 | 1.27E-37 | 515 | 504 |
| SIGLEC8  | 0.533648 | 3.03E-39 | 1.10E-37 | 515 | 514 |
| CCL18    | 0.534079 | 2.56E-39 | 9.32E-38 | 515 | 515 |
| PTCRA    | 0.534127 | 2.52E-39 | 9.17E-38 | 515 | 499 |
| MPP1     | 0.534242 | 2.41E-39 | 8.79E-38 | 515 | 515 |
| CLEC4E   | 0.534642 | 2.06E-39 | 7.54E-38 | 515 | 513 |
| ALOX5    | 0.535218 | 1.65E-39 | 6.05E-38 | 515 | 515 |
| C1R      | 0.535238 | 1.64E-39 | 6.01E-38 | 515 | 515 |
| C1S      | 0.535403 | 1.54E-39 | 5.65E-38 | 515 | 515 |
| GPR55    | 0.536249 | 1.11E-39 | 4.08E-38 | 515 | 512 |
| CD22     | 0.53659  | 9.71E-40 | 3.58E-38 | 515 | 515 |
| GCET2    | 0.536849 | 8.78E-40 | 3.24E-38 | 515 | 515 |
| OLR1     | 0.536933 | 8.50E-40 | 3.15E-38 | 515 | 515 |
| EGR2     | 0.537703 | 6.30E-40 | 2.33E-38 | 515 | 515 |
| XAF1     | 0.537813 | 6.03E-40 | 2.24E-38 | 515 | 515 |
| SIGLEC5  | 0.538506 | 4.60E-40 | 1.71E-38 | 515 | 515 |
| FAS      | 0.53878  | 4.13E-40 | 1.54E-38 | 515 | 515 |
| ETV7     | 0.539313 | 3.36E-40 | 1.25E-38 | 515 | 515 |
| NAPSB    | 0.539655 | 2.93E-40 | 1.10E-38 | 515 | 515 |
| C1orf38  | 0.539715 | 2.87E-40 | 1.08E-38 | 515 | 515 |
| PIM2     | 0.540046 | 2.52E-40 | 9.46E-39 | 515 | 515 |
| ZNF267   | 0.540221 | 2.35E-40 | 8.84E-39 | 515 | 515 |
| SLC12A3  | 0.540251 | 2.32E-40 | 8.76E-39 | 515 | 484 |
| CHRNA6   | 0.540641 | 1.99E-40 | 7.53E-39 | 515 | 473 |
| GRIN3A   | 0.540819 | 1.86E-40 | 7.03E-39 | 515 | 515 |
| FCRLA    | 0.541389 | 1.48E-40 | 5.62E-39 | 515 | 513 |
| FMNL1    | 0.542479 | 9.64E-41 | 3.66E-39 | 515 | 515 |
| ITGAM    | 0.542593 | 9.21E-41 | 3.51E-39 | 515 | 515 |
| CD83     | 0.542613 | 9.14E-41 | 3.49E-39 | 515 | 515 |
| KCNJ10   | 0.543016 | 7.79E-41 | 2.98E-39 | 515 | 514 |
| PLXNC1   | 0.543106 | 7.52E-41 | 2.88E-39 | 515 | 515 |
| TMEM229B | 0.543801 | 5.70E-41 | 2.19E-39 | 515 | 515 |
| HLA-DPB2 | 0.543857 | 5.58E-41 | 2.14E-39 | 515 | 508 |
| ENTPD1   | 0.544877 | 3.71E-41 | 1.43E-39 | 515 | 515 |
| CR1      | 0.545639 | 2.74E-41 | 1.06E-39 | 515 | 515 |
| VSIG4    | 0.545648 | 2.73E-41 | 1.05E-39 | 515 | 515 |
| TRIM69   | 0.545887 | 2.48E-41 | 9.60E-40 | 515 | 515 |
| VCAM1    | 0.546242 | 2.15E-41 | 8.34E-40 | 515 | 515 |
| DAPP1    | 0.546688 | 1.80E-41 | 6.99E-40 | 515 | 515 |
| CCL3     | 0.547465 | 1.32E-41 | 5.12E-40 | 515 | 515 |
| ADAM19   | 0.547944 | 1.08E-41 | 4.23E-40 | 515 | 515 |
| C15orf53 | 0.548108 | 1.01E-41 | 3.97E-40 | 515 | 370 |
| ITM2A    | 0.548309 | 9.36E-42 | 3.67E-40 | 515 | 515 |
| BTN2A2   | 0.548552 | 8.48E-42 | 3.33E-40 | 515 | 515 |
| ANKRD44  | 0.548776 | 7.75E-42 | 3.05E-40 | 515 | 515 |
| DPEP2    | 0.548897 | 7.37E-42 | 2.91E-40 | 515 | 515 |
| SIRPA    | 0.548921 | 7.30E-42 | 2.89E-40 | 515 | 515 |
| IL22RA2  | 0.549295 | 6.28E-42 | 2.48E-40 | 515 | 504 |
| PTAFR    | 0.55019  | 4.37E-42 | 1.73E-40 | 515 | 515 |
| FNBP1    | 0.550439 | 3.94E-42 | 1.57E-40 | 515 | 515 |
| CD163    | 0.550454 | 3.92E-42 | 1.56E-40 | 515 | 515 |
| EMR1     | 0.550458 | 3.91E-42 | 1.56E-40 | 515 | 513 |
| PLA2G7   | 0.551352 | 2.72E-42 | 1.09E-40 | 515 | 515 |
| CLEC4D   | 0.551745 | 2.32E-42 | 9.27E-41 | 515 | 499 |

|          |          |          |          |     |     |
|----------|----------|----------|----------|-----|-----|
| PDE6G    | 0.552004 | 2.08E-42 | 8.36E-41 | 515 | 515 |
| PPP2R2B  | 0.552469 | 1.72E-42 | 6.92E-41 | 515 | 515 |
| GZMM     | 0.552984 | 1.39E-42 | 5.62E-41 | 515 | 513 |
| GYPC     | 0.553081 | 1.34E-42 | 5.41E-41 | 515 | 515 |
| PATL2    | 0.553148 | 1.30E-42 | 5.27E-41 | 515 | 514 |
| ZBED2    | 0.553534 | 1.11E-42 | 4.51E-41 | 515 | 515 |
| HLA-DRB1 | 0.553656 | 1.06E-42 | 4.30E-41 | 515 | 515 |
| MMP25    | 0.554015 | 9.12E-43 | 3.71E-41 | 515 | 515 |
| CD300A   | 0.554133 | 8.69E-43 | 3.55E-41 | 515 | 515 |
| ARID5A   | 0.554623 | 7.10E-43 | 2.90E-41 | 515 | 515 |
| PARP15   | 0.55539  | 5.17E-43 | 2.12E-41 | 515 | 515 |
| NCF2     | 0.555769 | 4.42E-43 | 1.81E-41 | 515 | 515 |
| ZNF683   | 0.556332 | 3.50E-43 | 1.44E-41 | 515 | 515 |
| SLC1A3   | 0.556407 | 3.39E-43 | 1.40E-41 | 515 | 515 |
| WARS     | 0.556578 | 3.16E-43 | 1.31E-41 | 515 | 515 |
| CD7      | 0.557004 | 2.65E-43 | 1.10E-41 | 515 | 515 |
| HSF5     | 0.557982 | 1.76E-43 | 7.30E-42 | 515 | 451 |
| CYSLTR2  | 0.559092 | 1.11E-43 | 4.60E-42 | 515 | 513 |
| TAP2     | 0.559409 | 9.69E-44 | 4.04E-42 | 515 | 515 |
| IKZF3    | 0.559728 | 8.48E-44 | 3.54E-42 | 515 | 513 |
| CLEC2D   | 0.559803 | 8.21E-44 | 3.43E-42 | 515 | 515 |
| FAM159A  | 0.559987 | 7.60E-44 | 3.19E-42 | 515 | 514 |
| FCGR2B   | 0.560088 | 7.29E-44 | 3.06E-42 | 515 | 515 |
| LILRB3   | 0.560094 | 7.27E-44 | 3.06E-42 | 515 | 515 |
| PIK3R6   | 0.56014  | 7.13E-44 | 3.01E-42 | 515 | 515 |
| GPR82    | 0.560178 | 7.02E-44 | 2.97E-42 | 515 | 514 |
| CLEC17A  | 0.560873 | 5.24E-44 | 2.22E-42 | 515 | 486 |
| LRRC33   | 0.561324 | 4.33E-44 | 1.84E-42 | 515 | 515 |
| TMC8     | 0.561475 | 4.06E-44 | 1.73E-42 | 515 | 515 |
| AP1S2    | 0.561567 | 3.91E-44 | 1.67E-42 | 515 | 515 |
| CD300C   | 0.562986 | 2.14E-44 | 9.15E-43 | 515 | 515 |
| CD70     | 0.563065 | 2.07E-44 | 8.87E-43 | 515 | 510 |
| TD02     | 0.563316 | 1.86E-44 | 7.99E-43 | 515 | 515 |
| AKNA     | 0.56382  | 1.50E-44 | 6.46E-43 | 515 | 515 |
| PREX1    | 0.56466  | 1.05E-44 | 4.52E-43 | 515 | 515 |
| SH2B3    | 0.564831 | 9.76E-45 | 4.22E-43 | 515 | 515 |
| C8orf80  | 0.565024 | 8.99E-45 | 3.89E-43 | 515 | 513 |
| GPR84    | 0.565161 | 8.48E-45 | 3.68E-43 | 515 | 514 |
| SERPINB9 | 0.565341 | 7.85E-45 | 3.41E-43 | 515 | 515 |
| BLK      | 0.565716 | 6.69E-45 | 2.91E-43 | 515 | 510 |
| SERPING1 | 0.566275 | 5.26E-45 | 2.30E-43 | 515 | 515 |
| SRGN     | 0.566723 | 4.34E-45 | 1.90E-43 | 515 | 515 |
| NPL      | 0.567007 | 3.84E-45 | 1.68E-43 | 515 | 515 |
| MS4A7    | 0.567032 | 3.80E-45 | 1.67E-43 | 515 | 515 |
| CEACAM21 | 0.567068 | 3.74E-45 | 1.65E-43 | 515 | 515 |
| CYLD     | 0.567127 | 3.65E-45 | 1.61E-43 | 515 | 515 |
| CD101    | 0.567163 | 3.59E-45 | 1.59E-43 | 515 | 515 |
| GAPT     | 0.567381 | 3.27E-45 | 1.45E-43 | 515 | 515 |
| STK10    | 0.568398 | 2.11E-45 | 9.36E-44 | 515 | 515 |
| C1orf54  | 0.568443 | 2.07E-45 | 9.20E-44 | 515 | 515 |
| C2orf85  | 0.568897 | 1.70E-45 | 7.58E-44 | 515 | 401 |
| APOBEC3H | 0.568953 | 1.66E-45 | 7.41E-44 | 515 | 510 |
| VAV1     | 0.569043 | 1.59E-45 | 7.14E-44 | 515 | 515 |
| SSSTR3   | 0.569255 | 1.45E-45 | 6.53E-44 | 515 | 372 |

|           |          |          |          |     |     |
|-----------|----------|----------|----------|-----|-----|
| FCGR2C    | 0.569906 | 1.10E-45 | 4.93E-44 | 515 | 515 |
| ATP8B4    | 0.570015 | 1.04E-45 | 4.71E-44 | 515 | 515 |
| KLRG1     | 0.570037 | 1.04E-45 | 4.68E-44 | 515 | 515 |
| PLEKH01   | 0.570258 | 9.40E-46 | 4.26E-44 | 515 | 515 |
| SLC9A9    | 0.570507 | 8.44E-46 | 3.83E-44 | 515 | 515 |
| GLIPR2    | 0.570572 | 8.20E-46 | 3.73E-44 | 515 | 515 |
| MFNG      | 0.570586 | 8.15E-46 | 3.72E-44 | 515 | 515 |
| SIGLEC9   | 0.570802 | 7.42E-46 | 3.39E-44 | 515 | 515 |
| CD19      | 0.572093 | 4.22E-46 | 1.93E-44 | 515 | 511 |
| NCRNA0015 | 0.572516 | 3.51E-46 | 1.61E-44 | 515 | 326 |
| GIMAP8    | 0.572908 | 2.95E-46 | 1.36E-44 | 515 | 515 |
| SNX10     | 0.574055 | 1.78E-46 | 8.22E-45 | 515 | 515 |
| C1orf200  | 0.574223 | 1.65E-46 | 7.65E-45 | 515 | 426 |
| COTL1     | 0.574232 | 1.65E-46 | 7.64E-45 | 515 | 515 |
| SIGLEC1   | 0.574617 | 1.39E-46 | 6.46E-45 | 515 | 515 |
| FMNL3     | 0.574868 | 1.24E-46 | 5.80E-45 | 515 | 515 |
| INPP5D    | 0.575883 | 7.94E-47 | 3.71E-45 | 515 | 515 |
| SIGLEC7   | 0.576162 | 7.01E-47 | 3.28E-45 | 515 | 515 |
| ETS1      | 0.576535 | 5.94E-47 | 2.79E-45 | 515 | 515 |
| ZEB2      | 0.576555 | 5.89E-47 | 2.77E-45 | 515 | 515 |
| KCNAB2    | 0.576666 | 5.60E-47 | 2.64E-45 | 515 | 515 |
| LRRC25    | 0.576696 | 5.53E-47 | 2.61E-45 | 515 | 515 |
| IL9R      | 0.577026 | 4.78E-47 | 2.26E-45 | 515 | 509 |
| IL18R1    | 0.577374 | 4.09E-47 | 1.94E-45 | 515 | 515 |
| IFF01     | 0.577414 | 4.02E-47 | 1.91E-45 | 515 | 515 |
| ZNF101    | 0.577711 | 3.52E-47 | 1.68E-45 | 515 | 515 |
| TMEM140   | 0.577978 | 3.12E-47 | 1.49E-45 | 515 | 515 |
| LYZ       | 0.578069 | 3.00E-47 | 1.44E-45 | 515 | 515 |
| GBP2      | 0.578553 | 2.41E-47 | 1.16E-45 | 515 | 515 |
| CCL4L2    | 0.578789 | 2.17E-47 | 1.05E-45 | 515 | 515 |
| P2RY14    | 0.579059 | 1.92E-47 | 9.29E-46 | 515 | 515 |
| PLA2G4C   | 0.58002  | 1.25E-47 | 6.05E-46 | 515 | 515 |
| SLC02B1   | 0.580396 | 1.05E-47 | 5.12E-46 | 515 | 515 |
| CLEC12A   | 0.58072  | 9.11E-48 | 4.43E-46 | 515 | 515 |
| ITGAX     | 0.581139 | 7.54E-48 | 3.68E-46 | 515 | 515 |
| TMIGD2    | 0.581237 | 7.21E-48 | 3.53E-46 | 515 | 508 |
| RASSF2    | 0.581409 | 6.68E-48 | 3.27E-46 | 515 | 515 |
| CD274     | 0.581422 | 6.64E-48 | 3.26E-46 | 515 | 515 |
| SIRPB2    | 0.583348 | 2.77E-48 | 1.36E-46 | 515 | 515 |
| ZC3H12D   | 0.583451 | 2.64E-48 | 1.30E-46 | 515 | 514 |
| HCP5      | 0.58356  | 2.51E-48 | 1.24E-46 | 515 | 515 |
| GPR171    | 0.583617 | 2.45E-48 | 1.21E-46 | 515 | 515 |
| DUSP2     | 0.583747 | 2.31E-48 | 1.15E-46 | 515 | 515 |
| XCL2      | 0.583782 | 2.27E-48 | 1.13E-46 | 515 | 512 |
| LOC606724 | 0.584003 | 2.05E-48 | 1.03E-46 | 515 | 515 |
| GJD3      | 0.584136 | 1.93E-48 | 9.69E-47 | 515 | 515 |
| CNR2      | 0.584354 | 1.75E-48 | 8.79E-47 | 515 | 488 |
| GPR141    | 0.584917 | 1.35E-48 | 6.81E-47 | 515 | 511 |
| DOK3      | 0.585213 | 1.18E-48 | 5.96E-47 | 515 | 515 |
| RASSF4    | 0.585218 | 1.18E-48 | 5.96E-47 | 515 | 515 |
| CCR1      | 0.585371 | 1.10E-48 | 5.57E-47 | 515 | 515 |
| TNFAIP8   | 0.585489 | 1.04E-48 | 5.29E-47 | 515 | 515 |
| LRRC8C    | 0.587446 | 4.23E-49 | 2.16E-47 | 515 | 515 |
| LY86      | 0.587566 | 4.00E-49 | 2.04E-47 | 515 | 515 |

|          |          |          |          |     |     |
|----------|----------|----------|----------|-----|-----|
| PTGDR    | 0.587698 | 3.76E-49 | 1.93E-47 | 515 | 514 |
| NLRC4    | 0.588284 | 2.87E-49 | 1.48E-47 | 515 | 515 |
| CSF2RA   | 0.588379 | 2.75E-49 | 1.41E-47 | 515 | 515 |
| TNFRSF8  | 0.588659 | 2.41E-49 | 1.25E-47 | 515 | 515 |
| FCRL1    | 0.589192 | 1.88E-49 | 9.75E-48 | 515 | 500 |
| FGD3     | 0.589707 | 1.48E-49 | 7.69E-48 | 515 | 515 |
| CD74     | 0.589776 | 1.44E-49 | 7.47E-48 | 515 | 515 |
| MAFB     | 0.589781 | 1.43E-49 | 7.47E-48 | 515 | 515 |
| PIK3CD   | 0.589939 | 1.33E-49 | 6.96E-48 | 515 | 515 |
| HLA-F    | 0.590027 | 1.28E-49 | 6.70E-48 | 515 | 515 |
| RASGRP2  | 0.590077 | 1.25E-49 | 6.56E-48 | 515 | 515 |
| CD1D     | 0.590409 | 1.07E-49 | 5.64E-48 | 515 | 515 |
| SLC15A3  | 0.590939 | 8.34E-50 | 4.41E-48 | 515 | 515 |
| TYROBP   | 0.591041 | 7.96E-50 | 4.22E-48 | 515 | 515 |
| GGTA1    | 0.591599 | 6.13E-50 | 3.26E-48 | 515 | 515 |
| GLIPR1   | 0.59208  | 4.89E-50 | 2.61E-48 | 515 | 515 |
| CARD16   | 0.592286 | 4.44E-50 | 2.37E-48 | 515 | 515 |
| CLEC7A   | 0.593527 | 2.47E-50 | 1.33E-48 | 515 | 515 |
| HK3      | 0.594291 | 1.72E-50 | 9.27E-49 | 515 | 515 |
| STAT5A   | 0.594629 | 1.47E-50 | 7.92E-49 | 515 | 515 |
| MS4A4A   | 0.595402 | 1.02E-50 | 5.50E-49 | 515 | 515 |
| PTPRO    | 0.595409 | 1.02E-50 | 5.50E-49 | 515 | 515 |
| LGALS2   | 0.595788 | 8.48E-51 | 4.61E-49 | 515 | 507 |
| AIM2     | 0.596645 | 5.64E-51 | 3.07E-49 | 515 | 515 |
| LSP1     | 0.59705  | 4.65E-51 | 2.54E-49 | 515 | 515 |
| LAG3     | 0.597184 | 4.36E-51 | 2.39E-49 | 515 | 515 |
| PILRA    | 0.597204 | 4.32E-51 | 2.37E-49 | 515 | 515 |
| LAT2     | 0.597399 | 3.93E-51 | 2.17E-49 | 515 | 515 |
| MCART6   | 0.597618 | 3.54E-51 | 1.96E-49 | 515 | 514 |
| SH2D2A   | 0.597623 | 3.53E-51 | 1.96E-49 | 515 | 515 |
| TRIM22   | 0.597871 | 3.14E-51 | 1.74E-49 | 515 | 515 |
| IFI30    | 0.597958 | 3.01E-51 | 1.68E-49 | 515 | 515 |
| C11orf21 | 0.598825 | 1.99E-51 | 1.11E-49 | 515 | 513 |
| APOL6    | 0.598865 | 1.95E-51 | 1.09E-49 | 515 | 515 |
| ICAM3    | 0.599044 | 1.79E-51 | 1.00E-49 | 515 | 515 |
| HLA-DOB  | 0.599168 | 1.68E-51 | 9.48E-50 | 515 | 515 |
| DNAJC5B  | 0.599892 | 1.19E-51 | 6.71E-50 | 515 | 515 |
| P2RX7    | 0.600314 | 9.69E-52 | 5.49E-50 | 515 | 515 |
| TNFRSF1B | 0.601517 | 5.41E-52 | 3.07E-50 | 515 | 515 |
| BCL2A1   | 0.60198  | 4.32E-52 | 2.46E-50 | 515 | 515 |
| HLA-E    | 0.602345 | 3.62E-52 | 2.07E-50 | 515 | 515 |
| IL15     | 0.604056 | 1.57E-52 | 8.99E-51 | 515 | 515 |
| PRF1     | 0.604382 | 1.34E-52 | 7.69E-51 | 515 | 515 |
| JAK2     | 0.604388 | 1.33E-52 | 7.69E-51 | 515 | 515 |
| CD40     | 0.604564 | 1.22E-52 | 7.07E-51 | 515 | 515 |
| LRMP     | 0.60476  | 1.11E-52 | 6.44E-51 | 515 | 515 |
| CSF1R    | 0.604971 | 1.00E-52 | 5.83E-51 | 515 | 515 |
| TAP1     | 0.605115 | 9.34E-53 | 5.44E-51 | 515 | 515 |
| ITGB2    | 0.605622 | 7.28E-53 | 4.25E-51 | 515 | 515 |
| CTSS     | 0.605728 | 6.91E-53 | 4.05E-51 | 515 | 515 |
| FLT3LG   | 0.60739  | 3.04E-53 | 1.79E-51 | 515 | 515 |
| ADAMDEC1 | 0.607904 | 2.36E-53 | 1.39E-51 | 515 | 514 |
| FLI1     | 0.608309 | 1.93E-53 | 1.14E-51 | 515 | 515 |
| C13orf18 | 0.609151 | 1.27E-53 | 7.52E-52 | 515 | 515 |

|           |          |          |          |     |     |
|-----------|----------|----------|----------|-----|-----|
| RTN1      | 0.609663 | 9.81E-54 | 5.84E-52 | 515 | 515 |
| CXCR4     | 0.610206 | 7.48E-54 | 4.46E-52 | 515 | 515 |
| IL15RA    | 0.610647 | 6.00E-54 | 3.59E-52 | 515 | 515 |
| P2RY12    | 0.610891 | 5.31E-54 | 3.19E-52 | 515 | 506 |
| GNGT2     | 0.610934 | 5.20E-54 | 3.13E-52 | 515 | 515 |
| UBE2L6    | 0.613207 | 1.65E-54 | 9.99E-53 | 515 | 515 |
| STAT1     | 0.613308 | 1.57E-54 | 9.52E-53 | 515 | 515 |
| FGR       | 0.613317 | 1.56E-54 | 9.50E-53 | 515 | 515 |
| NLRP3     | 0.61354  | 1.40E-54 | 8.52E-53 | 515 | 515 |
| EPSTI1    | 0.613942 | 1.14E-54 | 6.97E-53 | 515 | 515 |
| FCGR1C    | 0.614438 | 8.86E-55 | 5.43E-53 | 515 | 515 |
| STAC3     | 0.614802 | 7.36E-55 | 4.53E-53 | 515 | 515 |
| RHOH      | 0.615024 | 6.58E-55 | 4.06E-53 | 515 | 515 |
| CIITA     | 0.615082 | 6.39E-55 | 3.95E-53 | 515 | 515 |
| CD8B      | 0.615236 | 5.90E-55 | 3.67E-53 | 515 | 515 |
| SAMHD1    | 0.61549  | 5.19E-55 | 3.23E-53 | 515 | 515 |
| HLA-DOA   | 0.615982 | 4.03E-55 | 2.52E-53 | 515 | 515 |
| C10orf128 | 0.616143 | 3.72E-55 | 2.33E-53 | 515 | 515 |
| PVRIG     | 0.616195 | 3.62E-55 | 2.27E-53 | 515 | 515 |
| CD33      | 0.617051 | 2.33E-55 | 1.47E-53 | 515 | 515 |
| FCGR1B    | 0.617146 | 2.22E-55 | 1.41E-53 | 515 | 515 |
| IL4I1     | 0.618216 | 1.28E-55 | 8.14E-54 | 515 | 515 |
| APOBEC3D  | 0.618598 | 1.05E-55 | 6.71E-54 | 515 | 515 |
| HLA-B     | 0.618797 | 9.51E-56 | 6.08E-54 | 515 | 515 |
| HVCN1     | 0.619039 | 8.39E-56 | 5.38E-54 | 515 | 515 |
| SUSD3     | 0.619495 | 6.63E-56 | 4.26E-54 | 515 | 515 |
| MS4A1     | 0.619587 | 6.32E-56 | 4.08E-54 | 515 | 514 |
| GZMB      | 0.619592 | 6.31E-56 | 4.08E-54 | 515 | 515 |
| FCGR1A    | 0.621107 | 2.87E-56 | 1.86E-54 | 515 | 515 |
| PLEKH02   | 0.621293 | 2.61E-56 | 1.70E-54 | 515 | 515 |
| TLR4      | 0.622329 | 1.52E-56 | 9.92E-55 | 515 | 515 |
| HLA-DQA1  | 0.623366 | 8.83E-57 | 5.78E-55 | 515 | 515 |
| CCR6      | 0.62429  | 5.43E-57 | 3.57E-55 | 515 | 515 |
| FCGR3A    | 0.624551 | 4.73E-57 | 3.12E-55 | 515 | 515 |
| STAT4     | 0.625809 | 2.44E-57 | 1.61E-55 | 515 | 515 |
| CST7      | 0.62588  | 2.35E-57 | 1.56E-55 | 515 | 515 |
| RGL4      | 0.626146 | 2.04E-57 | 1.36E-55 | 515 | 512 |
| CXCR5     | 0.626646 | 1.56E-57 | 1.05E-55 | 515 | 515 |
| HCLS1     | 0.626691 | 1.53E-57 | 1.02E-55 | 515 | 515 |
| CD79B     | 0.626798 | 1.44E-57 | 9.70E-56 | 515 | 515 |
| CD300LF   | 0.627143 | 1.20E-57 | 8.11E-56 | 515 | 515 |
| SPI1      | 0.627408 | 1.04E-57 | 7.06E-56 | 515 | 515 |
| TRPV2     | 0.627501 | 9.92E-58 | 6.74E-56 | 515 | 515 |
| JAK3      | 0.627734 | 8.76E-58 | 5.98E-56 | 515 | 515 |
| HLA-DPA1  | 0.627945 | 7.83E-58 | 5.36E-56 | 515 | 515 |
| SPIB      | 0.628241 | 6.69E-58 | 4.59E-56 | 515 | 515 |
| BTN3A1    | 0.628308 | 6.45E-58 | 4.45E-56 | 515 | 515 |
| TLR10     | 0.628557 | 5.65E-58 | 3.91E-56 | 515 | 515 |
| C1orf162  | 0.629054 | 4.33E-58 | 3.00E-56 | 515 | 515 |
| LAT       | 0.629099 | 4.22E-58 | 2.94E-56 | 515 | 515 |
| ITGA4     | 0.629439 | 3.52E-58 | 2.46E-56 | 515 | 515 |
| HLA-DPB1  | 0.629906 | 2.74E-58 | 1.92E-56 | 515 | 515 |
| BTN3A3    | 0.629924 | 2.71E-58 | 1.91E-56 | 515 | 515 |
| GNG2      | 0.629927 | 2.71E-58 | 1.91E-56 | 515 | 515 |

|           |          |          |          |     |     |
|-----------|----------|----------|----------|-----|-----|
| LST1      | 0.6302   | 2.34E-58 | 1.66E-56 | 515 | 515 |
| PTGER4    | 0.630799 | 1.70E-58 | 1.21E-56 | 515 | 515 |
| IL18BP    | 0.631116 | 1.43E-58 | 1.02E-56 | 515 | 515 |
| DOCK10    | 0.632165 | 8.10E-59 | 5.80E-57 | 515 | 515 |
| CLEC6A    | 0.632184 | 8.02E-59 | 5.77E-57 | 515 | 448 |
| STAP1     | 0.632679 | 6.13E-59 | 4.42E-57 | 515 | 514 |
| LILRA4    | 0.632751 | 5.90E-59 | 4.27E-57 | 515 | 505 |
| C5orf56   | 0.63482  | 1.91E-59 | 1.39E-57 | 515 | 515 |
| RNASE6    | 0.634894 | 1.83E-59 | 1.34E-57 | 515 | 515 |
| FAIM3     | 0.635009 | 1.72E-59 | 1.26E-57 | 515 | 515 |
| GIMAP1    | 0.635517 | 1.30E-59 | 9.58E-58 | 515 | 515 |
| CASP1     | 0.635599 | 1.25E-59 | 9.19E-58 | 515 | 515 |
| LAP3      | 0.637661 | 4.00E-60 | 2.96E-58 | 515 | 515 |
| P2RY8     | 0.637865 | 3.58E-60 | 2.66E-58 | 515 | 515 |
| SLC7A7    | 0.637889 | 3.53E-60 | 2.63E-58 | 515 | 515 |
| IL10      | 0.638627 | 2.34E-60 | 1.75E-58 | 515 | 514 |
| NCF1B     | 0.638659 | 2.30E-60 | 1.73E-58 | 515 | 514 |
| PARVG     | 0.640421 | 8.63E-61 | 6.51E-59 | 515 | 515 |
| TNFAIP3   | 0.641341 | 5.16E-61 | 3.91E-59 | 515 | 515 |
| GZMH      | 0.641526 | 4.65E-61 | 3.54E-59 | 515 | 514 |
| BCL11B    | 0.6418   | 3.99E-61 | 3.04E-59 | 515 | 515 |
| NCF4      | 0.6426   | 2.54E-61 | 1.95E-59 | 515 | 515 |
| KLRD1     | 0.642759 | 2.33E-61 | 1.79E-59 | 515 | 514 |
| NCF1C     | 0.642883 | 2.17E-61 | 1.67E-59 | 515 | 515 |
| TLR7      | 0.642887 | 2.16E-61 | 1.67E-59 | 515 | 515 |
| UBD       | 0.642899 | 2.15E-61 | 1.67E-59 | 515 | 515 |
| HCK       | 0.643263 | 1.75E-61 | 1.37E-59 | 515 | 515 |
| LAX1      | 0.643331 | 1.69E-61 | 1.32E-59 | 515 | 515 |
| ZNF80     | 0.643345 | 1.67E-61 | 1.32E-59 | 515 | 488 |
| IRF4      | 0.643841 | 1.26E-61 | 9.98E-60 | 515 | 515 |
| C1QC      | 0.643885 | 1.23E-61 | 9.77E-60 | 515 | 515 |
| AGAP2     | 0.644457 | 8.91E-62 | 7.10E-60 | 515 | 515 |
| CD180     | 0.645503 | 4.92E-62 | 3.93E-60 | 515 | 515 |
| APBB1IP   | 0.646272 | 3.17E-62 | 2.55E-60 | 515 | 515 |
| TCL1A     | 0.646447 | 2.87E-62 | 2.31E-60 | 515 | 499 |
| C16orf54  | 0.646689 | 2.50E-62 | 2.02E-60 | 515 | 515 |
| IFNG      | 0.646767 | 2.39E-62 | 1.94E-60 | 515 | 485 |
| C3AR1     | 0.646835 | 2.30E-62 | 1.88E-60 | 515 | 515 |
| B2M       | 0.646943 | 2.16E-62 | 1.77E-60 | 515 | 515 |
| NLRC5     | 0.648103 | 1.11E-62 | 9.15E-61 | 515 | 515 |
| DOCK8     | 0.648202 | 1.05E-62 | 8.67E-61 | 515 | 515 |
| CXCL11    | 0.648671 | 8.02E-63 | 6.65E-61 | 515 | 515 |
| GAB3      | 0.648705 | 7.86E-63 | 6.55E-61 | 515 | 515 |
| NFAM1     | 0.649003 | 6.62E-63 | 5.54E-61 | 515 | 515 |
| CMKLR1    | 0.649141 | 6.12E-63 | 5.14E-61 | 515 | 515 |
| FUT7      | 0.650112 | 3.49E-63 | 2.94E-61 | 515 | 515 |
| HLA-DRA   | 0.650403 | 2.95E-63 | 2.50E-61 | 515 | 515 |
| FCER1G    | 0.652229 | 1.02E-63 | 8.66E-62 | 515 | 515 |
| LOC400759 | 0.652358 | 9.44E-64 | 8.07E-62 | 515 | 514 |
| CXorf21   | 0.65307  | 6.23E-64 | 5.34E-62 | 515 | 515 |
| SAMD9L    | 0.653526 | 4.77E-64 | 4.11E-62 | 515 | 515 |
| CXCL13    | 0.653888 | 3.85E-64 | 3.33E-62 | 515 | 515 |
| PSMB9     | 0.653919 | 3.78E-64 | 3.29E-62 | 515 | 515 |
| RGS18     | 0.658095 | 3.19E-65 | 2.78E-63 | 515 | 514 |

|           |          |          |          |     |     |
|-----------|----------|----------|----------|-----|-----|
| C1QB      | 0.659896 | 1.08E-65 | 9.51E-64 | 515 | 515 |
| CAMK4     | 0.661039 | 5.45E-66 | 4.80E-64 | 515 | 512 |
| FPR3      | 0.662194 | 2.71E-66 | 2.40E-64 | 515 | 515 |
| LILRB2    | 0.662322 | 2.51E-66 | 2.23E-64 | 515 | 515 |
| GPR183    | 0.662858 | 1.81E-66 | 1.61E-64 | 515 | 515 |
| HLA-DMB   | 0.663698 | 1.09E-66 | 9.73E-65 | 515 | 515 |
| 1-Mar     | 0.664168 | 8.14E-67 | 7.33E-65 | 515 | 515 |
| RUNX3     | 0.664482 | 6.72E-67 | 6.08E-65 | 515 | 515 |
| PIK3R5    | 0.66451  | 6.61E-67 | 6.00E-65 | 515 | 515 |
| ZBTB32    | 0.664555 | 6.43E-67 | 5.87E-65 | 515 | 512 |
| PIK3CG    | 0.665025 | 4.82E-67 | 4.42E-65 | 515 | 515 |
| C1QA      | 0.665177 | 4.39E-67 | 4.04E-65 | 515 | 515 |
| CD72      | 0.665754 | 3.08E-67 | 2.85E-65 | 515 | 515 |
| HAPLN3    | 0.666484 | 1.96E-67 | 1.83E-65 | 515 | 515 |
| MPEG1     | 0.666934 | 1.49E-67 | 1.39E-65 | 515 | 515 |
| TNFSF8    | 0.668232 | 6.66E-68 | 6.25E-66 | 515 | 515 |
| ZBP1      | 0.668496 | 5.65E-68 | 5.33E-66 | 515 | 515 |
| LTB       | 0.668679 | 5.05E-68 | 4.78E-66 | 515 | 515 |
| PTPN22    | 0.669983 | 2.24E-68 | 2.13E-66 | 515 | 515 |
| IRF1      | 0.670519 | 1.60E-68 | 1.53E-66 | 515 | 515 |
| GPR114    | 0.670751 | 1.38E-68 | 1.33E-66 | 515 | 515 |
| TTC24     | 0.671631 | 7.96E-69 | 7.69E-67 | 515 | 454 |
| STX11     | 0.671928 | 6.60E-69 | 6.41E-67 | 515 | 515 |
| LY9       | 0.672213 | 5.52E-69 | 5.38E-67 | 515 | 515 |
| SLC31A2   | 0.67352  | 2.41E-69 | 2.37E-67 | 515 | 515 |
| IL7R      | 0.674172 | 1.60E-69 | 1.57E-67 | 515 | 515 |
| KLHL6     | 0.674409 | 1.37E-69 | 1.36E-67 | 515 | 515 |
| FLT3      | 0.674608 | 1.21E-69 | 1.20E-67 | 515 | 513 |
| LAIR1     | 0.675054 | 9.11E-70 | 9.10E-68 | 515 | 515 |
| CD84      | 0.675692 | 6.06E-70 | 6.08E-68 | 515 | 515 |
| MYO1F     | 0.675769 | 5.77E-70 | 5.82E-68 | 515 | 515 |
| PRKCB     | 0.675879 | 5.38E-70 | 5.46E-68 | 515 | 515 |
| TNFAIP8L2 | 0.676032 | 4.88E-70 | 4.97E-68 | 515 | 515 |
| HSD11B1   | 0.676665 | 3.25E-70 | 3.33E-68 | 515 | 515 |
| LILRB4    | 0.677324 | 2.13E-70 | 2.19E-68 | 515 | 515 |
| GIMAP2    | 0.6782   | 1.21E-70 | 1.25E-68 | 515 | 515 |
| RAC2      | 0.678974 | 7.33E-71 | 7.63E-69 | 515 | 515 |
| IL18RAP   | 0.679103 | 6.74E-71 | 7.06E-69 | 515 | 514 |
| AMICA1    | 0.679612 | 4.85E-71 | 5.10E-69 | 515 | 515 |
| NCF1      | 0.681289 | 1.63E-71 | 1.72E-69 | 515 | 515 |
| TBX21     | 0.681346 | 1.57E-71 | 1.67E-69 | 515 | 515 |
| CD52      | 0.682437 | 7.66E-72 | 8.19E-70 | 515 | 515 |
| GIMAP6    | 0.682551 | 7.11E-72 | 7.64E-70 | 515 | 515 |
| DOK2      | 0.68272  | 6.36E-72 | 6.87E-70 | 515 | 515 |
| MNDA      | 0.682977 | 5.37E-72 | 5.84E-70 | 515 | 515 |
| PPP1R16B  | 0.683291 | 4.37E-72 | 4.77E-70 | 515 | 515 |
| CD27      | 0.68394  | 2.85E-72 | 3.13E-70 | 515 | 515 |
| SIGLEC10  | 0.684973 | 1.44E-72 | 1.59E-70 | 515 | 515 |
| ABI3      | 0.684986 | 1.42E-72 | 1.58E-70 | 515 | 515 |
| PIK3AP1   | 0.685161 | 1.27E-72 | 1.42E-70 | 515 | 515 |
| KBTBD8    | 0.68614  | 6.61E-73 | 7.42E-71 | 515 | 515 |
| CXCR3     | 0.687326 | 2.99E-73 | 3.38E-71 | 515 | 515 |
| MCOLN2    | 0.688381 | 1.47E-73 | 1.67E-71 | 515 | 514 |
| CD244     | 0.68945  | 7.17E-74 | 8.19E-72 | 515 | 515 |

|           |          |          |          |     |     |
|-----------|----------|----------|----------|-----|-----|
| CD40LG    | 0.689857 | 5.45E-74 | 6.26E-72 | 515 | 514 |
| NKG7      | 0.692396 | 9.68E-75 | 1.12E-72 | 515 | 515 |
| LAPTM5    | 0.692537 | 8.80E-75 | 1.02E-72 | 515 | 515 |
| SELPLG    | 0.692575 | 8.57E-75 | 1.00E-72 | 515 | 515 |
| FERMT3    | 0.693224 | 5.49E-75 | 6.46E-73 | 515 | 515 |
| RAB33A    | 0.698651 | 1.27E-76 | 1.50E-74 | 515 | 515 |
| CORO1A    | 0.699738 | 5.93E-77 | 7.05E-75 | 515 | 515 |
| CXCL10    | 0.700787 | 2.82E-77 | 3.38E-75 | 515 | 515 |
| TRAF1     | 0.701577 | 1.61E-77 | 1.94E-75 | 515 | 515 |
| IGSF6     | 0.701953 | 1.24E-77 | 1.50E-75 | 515 | 515 |
| ARHGEF6   | 0.702079 | 1.13E-77 | 1.38E-75 | 515 | 515 |
| ITGB7     | 0.702617 | 7.69E-78 | 9.43E-76 | 515 | 515 |
| EVI2A     | 0.702906 | 6.26E-78 | 7.72E-76 | 515 | 515 |
| AIF1      | 0.704532 | 1.95E-78 | 2.42E-76 | 515 | 515 |
| HCST      | 0.70471  | 1.72E-78 | 2.15E-76 | 515 | 515 |
| CD4       | 0.705108 | 1.29E-78 | 1.62E-76 | 515 | 515 |
| EBI3      | 0.705169 | 1.23E-78 | 1.56E-76 | 515 | 514 |
| SP140     | 0.705276 | 1.14E-78 | 1.45E-76 | 515 | 515 |
| SLAMF7    | 0.705487 | 9.81E-79 | 1.26E-76 | 515 | 515 |
| CD37      | 0.705701 | 8.41E-79 | 1.08E-76 | 515 | 515 |
| IL2RA     | 0.705754 | 8.09E-79 | 1.05E-76 | 515 | 515 |
| CCL19     | 0.706275 | 5.55E-79 | 7.25E-77 | 515 | 514 |
| TLR8      | 0.706936 | 3.44E-79 | 4.52E-77 | 515 | 515 |
| FGD2      | 0.707254 | 2.73E-79 | 3.61E-77 | 515 | 515 |
| SPN       | 0.707319 | 2.60E-79 | 3.47E-77 | 515 | 515 |
| MS4A6A    | 0.708257 | 1.31E-79 | 1.76E-77 | 515 | 515 |
| FAM78A    | 0.708565 | 1.05E-79 | 1.42E-77 | 515 | 515 |
| CD200R1   | 0.708599 | 1.02E-79 | 1.39E-77 | 515 | 515 |
| FAM26F    | 0.709435 | 5.54E-80 | 7.58E-78 | 515 | 515 |
| FASLG     | 0.709837 | 4.12E-80 | 5.68E-78 | 515 | 513 |
| CYBB      | 0.709848 | 4.09E-80 | 5.68E-78 | 515 | 515 |
| SCML4     | 0.709856 | 4.07E-80 | 5.68E-78 | 515 | 514 |
| FCRL3     | 0.71017  | 3.23E-80 | 4.54E-78 | 515 | 512 |
| SLA       | 0.710547 | 2.44E-80 | 3.46E-78 | 515 | 515 |
| CXCR2P1   | 0.710577 | 2.39E-80 | 3.41E-78 | 515 | 509 |
| CLEC4A    | 0.71118  | 1.53E-80 | 2.20E-78 | 515 | 515 |
| FGL2      | 0.711639 | 1.09E-80 | 1.58E-78 | 515 | 515 |
| CCL4      | 0.713024 | 3.90E-81 | 5.68E-79 | 515 | 515 |
| LCP1      | 0.714257 | 1.55E-81 | 2.28E-79 | 515 | 515 |
| CLEC10A   | 0.714529 | 1.26E-81 | 1.87E-79 | 515 | 515 |
| WIPF1     | 0.71517  | 7.81E-82 | 1.16E-79 | 515 | 515 |
| RCS1      | 0.715558 | 5.83E-82 | 8.76E-80 | 515 | 515 |
| PDCD1     | 0.71597  | 4.27E-82 | 6.47E-80 | 515 | 515 |
| KLRB1     | 0.716198 | 3.60E-82 | 5.49E-80 | 515 | 514 |
| P2RY13    | 0.716768 | 2.34E-82 | 3.59E-80 | 515 | 515 |
| CLECL1    | 0.717581 | 1.26E-82 | 1.95E-80 | 515 | 511 |
| CD86      | 0.718098 | 8.50E-83 | 1.33E-80 | 515 | 515 |
| LOC100188 | 0.719499 | 2.91E-83 | 4.59E-81 | 515 | 515 |
| PTPRCAP   | 0.720204 | 1.70E-83 | 2.69E-81 | 515 | 515 |
| HAVCR2    | 0.720402 | 1.46E-83 | 2.33E-81 | 515 | 515 |
| WAS       | 0.721548 | 6.02E-84 | 9.70E-82 | 515 | 515 |
| GBP1      | 0.722539 | 2.79E-84 | 4.53E-82 | 515 | 515 |
| CYTH4     | 0.72293  | 2.06E-84 | 3.37E-82 | 515 | 515 |
| TNFSF13B  | 0.723053 | 1.87E-84 | 3.09E-82 | 515 | 515 |



|           |          |          |          |     |     |
|-----------|----------|----------|----------|-----|-----|
| GZMA      | 0.723627 | 1.20E-84 | 1.99E-82 | 515 | 515 |
| GMFG      | 0.724241 | 7.40E-85 | 1.24E-82 | 515 | 515 |
| ASB2      | 0.724787 | 4.82E-85 | 8.17E-83 | 515 | 515 |
| KLRK1     | 0.724823 | 4.69E-85 | 8.01E-83 | 515 | 515 |
| APOL3     | 0.725938 | 1.95E-85 | 3.36E-83 | 515 | 515 |
| NLRC3     | 0.726124 | 1.68E-85 | 2.93E-83 | 515 | 515 |
| IL16      | 0.72619  | 1.60E-85 | 2.80E-83 | 515 | 515 |
| ARHGAP25  | 0.726923 | 8.96E-86 | 1.58E-83 | 515 | 515 |
| CCL5      | 0.727424 | 6.02E-86 | 1.07E-83 | 515 | 515 |
| TNFRSF9   | 0.727927 | 4.04E-86 | 7.27E-84 | 515 | 513 |
| SEPT1     | 0.728219 | 3.20E-86 | 5.81E-84 | 515 | 515 |
| RASAL3    | 0.72879  | 2.03E-86 | 3.72E-84 | 515 | 515 |
| PLA2G2D   | 0.72879  | 2.03E-86 | 3.72E-84 | 515 | 514 |
| GVIN1     | 0.728958 | 1.77E-86 | 3.31E-84 | 515 | 515 |
| SELL      | 0.729015 | 1.69E-86 | 3.20E-84 | 515 | 515 |
| GRAP2     | 0.729263 | 1.39E-86 | 2.65E-84 | 515 | 515 |
| CXCL9     | 0.730312 | 5.99E-87 | 1.15E-84 | 515 | 515 |
| C17orf87  | 0.730567 | 4.88E-87 | 9.47E-85 | 515 | 513 |
| SLFN12L   | 0.731148 | 3.05E-87 | 5.98E-85 | 515 | 515 |
| CD69      | 0.731686 | 1.98E-87 | 3.91E-85 | 515 | 515 |
| LILRB1    | 0.731692 | 1.97E-87 | 3.91E-85 | 515 | 515 |
| ARHGAP30  | 0.731895 | 1.67E-87 | 3.37E-85 | 515 | 515 |
| NCR3      | 0.731966 | 1.58E-87 | 3.21E-85 | 515 | 513 |
| DOCK2     | 0.732055 | 1.47E-87 | 3.02E-85 | 515 | 515 |
| GIMAP7    | 0.732608 | 9.36E-88 | 1.95E-85 | 515 | 515 |
| SLAMF8    | 0.732865 | 7.59E-88 | 1.60E-85 | 515 | 515 |
| APOBEC3G  | 0.73312  | 6.17E-88 | 1.31E-85 | 515 | 515 |
| BIN2      | 0.733484 | 4.59E-88 | 9.86E-86 | 515 | 515 |
| FYB       | 0.734106 | 2.76E-88 | 6.00E-86 | 515 | 515 |
| GBP4      | 0.734442 | 2.10E-88 | 4.60E-86 | 515 | 515 |
| ABCD2     | 0.736295 | 4.56E-89 | 1.01E-86 | 515 | 514 |
| ZAP70     | 0.737511 | 1.67E-89 | 3.74E-87 | 515 | 515 |
| EOMES     | 0.738126 | 9.99E-90 | 2.27E-87 | 515 | 514 |
| CCR2      | 0.740359 | 1.54E-90 | 3.54E-88 | 515 | 515 |
| CD8A      | 0.741388 | 6.46E-91 | 1.50E-88 | 515 | 515 |
| BTK       | 0.741905 | 4.17E-91 | 9.80E-89 | 515 | 515 |
| PDCD1LG2  | 0.743847 | 7.97E-92 | 1.90E-89 | 515 | 515 |
| PSTPIP1   | 0.744596 | 4.20E-92 | 1.01E-89 | 515 | 515 |
| CCR4      | 0.74476  | 3.64E-92 | 8.88E-90 | 515 | 513 |
| GPR18     | 0.744791 | 3.55E-92 | 8.76E-90 | 515 | 515 |
| MAP4K1    | 0.747026 | 5.15E-93 | 1.29E-90 | 515 | 515 |
| CYTIP     | 0.748866 | 1.03E-93 | 2.62E-91 | 515 | 515 |
| GFI1      | 0.749466 | 6.11E-94 | 1.56E-91 | 515 | 515 |
| AOAH      | 0.750209 | 3.18E-94 | 8.24E-92 | 515 | 515 |
| ARHGAP15  | 0.750227 | 3.13E-94 | 8.22E-92 | 515 | 515 |
| IL2RG     | 0.75354  | 1.65E-95 | 4.39E-93 | 515 | 515 |
| NCKAP1L   | 0.75376  | 1.35E-95 | 3.65E-93 | 515 | 515 |
| LPXN      | 0.753879 | 1.21E-95 | 3.33E-93 | 515 | 515 |
| LOC100233 | 0.754363 | 7.86E-96 | 2.18E-93 | 515 | 514 |
| CD226     | 0.755006 | 4.40E-96 | 1.24E-93 | 515 | 515 |
| CD48      | 0.756325 | 1.33E-96 | 3.81E-94 | 515 | 515 |
| CSF2RB    | 0.758285 | 2.23E-97 | 6.47E-95 | 515 | 515 |
| SAMSN1    | 0.758945 | 1.22E-97 | 3.58E-95 | 515 | 515 |
| EVI2B     | 0.761293 | 1.39E-98 | 4.14E-96 | 515 | 515 |

|          |          |          |          |     |     |
|----------|----------|----------|----------|-----|-----|
| TFEC     | 0.761698 | 9.53E-99 | 2.89E-96 | 515 | 515 |
| GIMAP4   | 0.762778 | 3.47E-99 | 1.07E-96 | 515 | 515 |
| TBC1D10C | 0.762847 | 3.26E-99 | 1.02E-96 | 515 | 515 |
| MIR155HG | 0.764313 | #####    | 2.60E-97 | 515 | 515 |
| CD28     | 0.76433  | #####    | 2.60E-97 | 515 | 515 |
| UBASH3A  | 0.765415 | #####    | 9.46E-98 | 515 | 514 |
| C5orf20  | 0.766139 | #####    | 4.83E-98 | 515 | 508 |
| IRF8     | 0.767577 | #####    | 1.24E-98 | 515 | 515 |
| GIMAP5   | 0.768183 | #####    | 7.05E-99 | 515 | 515 |
| ARHGAP9  | 0.768382 | #####    | 5.92E-99 | 515 | 515 |
| GBP5     | 0.768692 | #####    | 4.47E-99 | 515 | 515 |
| CD5      | 0.769048 | #####    | 3.23E-99 | 515 | 515 |
| CD96     | 0.769394 | #####    | 2.35E-99 | 515 | 515 |
| SLA2     | 0.77072  | #####    | #####    | 515 | 515 |
| SLAMF6   | 0.771254 | #####    | #####    | 515 | 515 |
| CD80     | 0.771328 | #####    | #####    | 515 | 515 |
| ACAP1    | 0.771607 | #####    | #####    | 515 | 515 |
| ZNF831   | 0.772095 | #####    | #####    | 515 | 515 |
| GPR65    | 0.773215 | #####    | #####    | 515 | 515 |
| CD6      | 0.774121 | #####    | #####    | 515 | 515 |
| TIFAB    | 0.775802 | #####    | #####    | 515 | 504 |
| SAMD3    | 0.777262 | #####    | #####    | 515 | 515 |
| CD53     | 0.779708 | #####    | #####    | 515 | 515 |
| IL10RA   | 0.780063 | #####    | #####    | 515 | 515 |
| CCR7     | 0.780123 | #####    | #####    | 515 | 515 |
| ITGAL    | 0.781148 | #####    | #####    | 515 | 515 |
| IKZF1    | 0.783265 | #####    | #####    | 515 | 515 |
| CD3G     | 0.783649 | #####    | #####    | 515 | 514 |
| KIAA0748 | 0.784242 | #####    | #####    | 515 | 513 |
| GPR174   | 0.784489 | #####    | #####    | 515 | 511 |
| CRTAM    | 0.786896 | #####    | #####    | 515 | 514 |
| LCK      | 0.787327 | #####    | #####    | 515 | 515 |
| PLEK     | 0.787372 | #####    | #####    | 515 | 515 |
| IL2RB    | 0.787916 | #####    | #####    | 515 | 515 |
| GZMK     | 0.788173 | #####    | #####    | 515 | 515 |
| SNX20    | 0.796566 | #####    | #####    | 515 | 515 |
| SIT1     | 0.797735 | #####    | #####    | 515 | 514 |
| FOXP3    | 0.797866 | #####    | #####    | 515 | 515 |
| LTA      | 0.798528 | #####    | #####    | 515 | 513 |
| CCR8     | 0.798664 | #####    | #####    | 515 | 507 |
| TAGAP    | 0.800047 | #####    | #####    | 515 | 515 |
| LCP2     | 0.800569 | #####    | #####    | 515 | 515 |
| PTPN7    | 0.800939 | #####    | #####    | 515 | 515 |
| THEMIS   | 0.802601 | #####    | #####    | 515 | 515 |
| TRAF3IP3 | 0.808757 | #####    | #####    | 515 | 515 |
| P2RY10   | 0.811755 | #####    | #####    | 515 | 515 |
| IL21R    | 0.812535 | #####    | #####    | 515 | 515 |
| SASH3    | 0.8142   | #####    | #####    | 515 | 515 |
| CD3D     | 0.816331 | #####    | #####    | 515 | 515 |
| IL12RB1  | 0.817603 | #####    | #####    | 515 | 515 |
| CCR5     | 0.817767 | #####    | #####    | 515 | 515 |
| PYHIN1   | 0.81934  | #####    | #####    | 515 | 514 |
| SLAMF1   | 0.821168 | #####    | #####    | 515 | 515 |
| PTPRC    | 0.82187  | #####    | #####    | 515 | 515 |

|        |          |       |       |     |     |
|--------|----------|-------|-------|-----|-----|
| BTLA   | 0.822827 | ##### | ##### | 515 | 515 |
| CD3E   | 0.823769 | ##### | ##### | 515 | 515 |
| CXCR6  | 0.835027 | ##### | ##### | 515 | 515 |
| TRAT1  | 0.8375   | ##### | ##### | 515 | 512 |
| ITK    | 0.841443 | ##### | ##### | 515 | 515 |
| SIRPG  | 0.843745 | ##### | ##### | 515 | 515 |
| CD247  | 0.846916 | ##### | ##### | 515 | 515 |
| CTLA4  | 0.866219 | ##### | ##### | 515 | 515 |
| TIGIT  | 0.872995 | ##### | ##### | 515 | 515 |
| CD2    | 0.873187 | ##### | ##### | 515 | 515 |
| SH2D1A | 0.875741 | ##### | ##### | 515 | 514 |
| ICOS   | 1        | ##### | ##### | 515 | 515 |
